# Supplementary material for: Molecular Consequences of Peripheral Influenza A Infection on Cell Populations in the Murine Hypothalamus
Source: bioRxiv preprint, doi:10.1101/2023.03.06.530999, version 2 (2023-06-19)
Supplement: Supplemental Table 4 [file 530999_file06.xlsx]

## Sheet: GABA
gene

## Sheet: Glut
gene

## Sheet: NonN
gene
