# Supplementary material for: Molecular Consequences of Peripheral Influenza A Infection on Cell Populations in the Murine Hypothalamus
Source: bioRxiv preprint, doi:10.1101/2023.03.06.530999, version 2 (2023-06-19)
Supplement: Supplemental Table 5 [file 530999_file07.xlsx]

## Sheet: 3dpi - DEG - across all cells
genes	dpi	logFC	lfcSE	baseMean	PValue	FDR	Z	Za	stat	method	package	test	fit	sizeFactor
Mt1	3dpi	-2.3821		1998.75	9.88439e-13	2.08857e-08	-7.13211	-5.6045	819.392	pseudobulk	DESeq2	LRT	glmGamPoi	scranSumFactors
Mt2	3dpi	-2.16907		285.359	1.15588e-11	1.22119e-07	-6.78562	-5.2903	548.059	pseudobulk	DESeq2	LRT	glmGamPoi	scranSumFactors
Atp5md	3dpi	-1.80383		1356.73	5.72192e-11	3.12485e-07	-6.55083	-5.11576	421.179	pseudobulk	DESeq2	LRT	glmGamPoi	scranSumFactors
Mt3	3dpi	-2.0587		3004.16	6.60741e-11	3.12485e-07	-6.52931	-5.11576	411.284	pseudobulk	DESeq2	LRT	glmGamPoi	scranSumFactors
Cox7c	3dpi	-1.81364		2238.88	8.49478e-11	3.12485e-07	-6.49157	-5.11576	394.545	pseudobulk	DESeq2	LRT	glmGamPoi	scranSumFactors
Cst3	3dpi	-2.33431		9539.57	9.98901e-11	3.12485e-07	-6.46712	-5.11576	384.103	pseudobulk	DESeq2	LRT	glmGamPoi	scranSumFactors
Cd63	3dpi	-1.96678		794.925	1.36723e-10	3.12485e-07	-6.4195	-5.11576	364.634	pseudobulk	DESeq2	LRT	glmGamPoi	scranSumFactors
Atp1b2	3dpi	-1.73237		1129.97	1.53147e-10	3.12485e-07	-6.40221	-5.11576	357.836	pseudobulk	DESeq2	LRT	glmGamPoi	scranSumFactors
Fabp7	3dpi	-2.38758		93.3748	1.75609e-10	3.12485e-07	-6.38128	-5.11576	349.798	pseudobulk	DESeq2	LRT	glmGamPoi	scranSumFactors
Atp5k	3dpi	-2.01992		732.301	1.76836e-10	3.12485e-07	-6.38022	-5.11576	349.393	pseudobulk	DESeq2	LRT	glmGamPoi	scranSumFactors
Dbi	3dpi	-1.99446		1279.1	1.78338e-10	3.12485e-07	-6.37892	-5.11576	348.903	pseudobulk	DESeq2	LRT	glmGamPoi	scranSumFactors
Ramp2	3dpi	-1.35679		298.314	1.81922e-10	3.12485e-07	-6.37587	-5.11576	347.752	pseudobulk	DESeq2	LRT	glmGamPoi	scranSumFactors
Rps29	3dpi	-2.13136		1029.99	1.95441e-10	3.12485e-07	-6.36488	-5.11576	343.635	pseudobulk	DESeq2	LRT	glmGamPoi	scranSumFactors
Spry2	3dpi	-1.63027		266.35	2.07041e-10	3.12485e-07	-6.35603	-5.11576	340.358	pseudobulk	DESeq2	LRT	glmGamPoi	scranSumFactors
Clu	3dpi	-1.64275		1763.06	2.65408e-10	3.60266e-07	-6.31774	-5.08884	326.585	pseudobulk	DESeq2	LRT	glmGamPoi	scranSumFactors
Mdk	3dpi	-2.18084		188.868	2.728e-10	3.60266e-07	-6.3135	-5.08884	325.095	pseudobulk	DESeq2	LRT	glmGamPoi	scranSumFactors
H2-K1	3dpi	-1.7877		167.49	3.525e-10	4.23865e-07	-6.27373	-5.05792	311.506	pseudobulk	DESeq2	LRT	glmGamPoi	scranSumFactors
Gm10177	3dpi	-2.37591		110.825	3.72539e-10	4.23865e-07	-6.26512	-5.05792	308.647	pseudobulk	DESeq2	LRT	glmGamPoi	scranSumFactors
Cxcl14	3dpi	-1.74669		198.176	3.81137e-10	4.23865e-07	-6.26156	-5.05792	307.475	pseudobulk	DESeq2	LRT	glmGamPoi	scranSumFactors
Prdx1	3dpi	-1.52037		1178.58	4.24637e-10	4.41849e-07	-6.24469	-5.04998	301.98	pseudobulk	DESeq2	LRT	glmGamPoi	scranSumFactors
Id2	3dpi	-1.69621		262.289	4.49432e-10	4.41849e-07	-6.23581	-5.04998	299.133	pseudobulk	DESeq2	LRT	glmGamPoi	scranSumFactors
Tst	3dpi	-2.46889		112.416	4.79997e-10	4.41849e-07	-6.22551	-5.04998	295.864	pseudobulk	DESeq2	LRT	glmGamPoi	scranSumFactors
Rpl38	3dpi	-2.25614		1415.3	4.85083e-10	4.41849e-07	-6.22386	-5.04998	295.344	pseudobulk	DESeq2	LRT	glmGamPoi	scranSumFactors
Rpl39	3dpi	-2.08283		1004.62	5.01863e-10	4.41849e-07	-6.21852	-5.04998	293.67	pseudobulk	DESeq2	LRT	glmGamPoi	scranSumFactors
Aldoc	3dpi	-1.90567		1281.68	5.72641e-10	4.66387e-07	-6.19778	-5.03965	287.265	pseudobulk	DESeq2	LRT	glmGamPoi	scranSumFactors
Ndufa3	3dpi	-2.04332		699.168	5.7388e-10	4.66387e-07	-6.19744	-5.03965	287.161	pseudobulk	DESeq2	LRT	glmGamPoi	scranSumFactors
Etfb	3dpi	-1.59401		211.784	6.53898e-10	5.0181e-07	-6.17686	-5.02562	280.959	pseudobulk	DESeq2	LRT	glmGamPoi	scranSumFactors
Cox17	3dpi	-1.58013		619.391	6.64964e-10	5.0181e-07	-6.17421	-5.02562	280.171	pseudobulk	DESeq2	LRT	glmGamPoi	scranSumFactors
Rps21	3dpi	-1.59762		1790.13	7.39797e-10	5.12698e-07	-6.15733	-5.0215	275.212	pseudobulk	DESeq2	LRT	glmGamPoi	scranSumFactors
Apoe	3dpi	-2.13629		7213.52	7.5599e-10	5.12698e-07	-6.1539	-5.0215	274.216	pseudobulk	DESeq2	LRT	glmGamPoi	scranSumFactors
Fxyd1	3dpi	-2.39053		242.291	7.7522e-10	5.12698e-07	-6.14992	-5.0215	273.064	pseudobulk	DESeq2	LRT	glmGamPoi	scranSumFactors
Gsta4	3dpi	-1.65883		195.288	7.76447e-10	5.12698e-07	-6.14967	-5.0215	272.992	pseudobulk	DESeq2	LRT	glmGamPoi	scranSumFactors
Rpl37	3dpi	-2.01946		1555.42	8.06654e-10	5.16503e-07	-6.14361	-5.02008	271.251	pseudobulk	DESeq2	LRT	glmGamPoi	scranSumFactors
Atp5j2	3dpi	-1.45106		1863.96	9.53776e-10	5.92513e-07	-6.11696	-4.99364	263.737	pseudobulk	DESeq2	LRT	glmGamPoi	scranSumFactors
Ndufa12	3dpi	-1.35824		839.65	9.97283e-10	5.92513e-07	-6.10984	-4.99364	261.77	pseudobulk	DESeq2	LRT	glmGamPoi	scranSumFactors
Gng5	3dpi	-1.96677		225.187	1.00949e-09	5.92513e-07	-6.1079	-4.99364	261.236	pseudobulk	DESeq2	LRT	glmGamPoi	scranSumFactors
Rpl35	3dpi	-1.83149		1024.89	1.0475e-09	5.98209e-07	-6.102	-4.99179	259.62	pseudobulk	DESeq2	LRT	glmGamPoi	scranSumFactors
Pet100	3dpi	-1.40737		325.151	1.1308e-09	6.14487e-07	-6.08976	-4.98661	256.304	pseudobulk	DESeq2	LRT	glmGamPoi	scranSumFactors
Uqcr11	3dpi	-2.00592		928.893	1.13417e-09	6.14487e-07	-6.08928	-4.98661	256.176	pseudobulk	DESeq2	LRT	glmGamPoi	scranSumFactors
Ndufb1	3dpi	-1.28656		893.762	1.26029e-09	6.65746e-07	-6.07238	-4.9711	251.677	pseudobulk	DESeq2	LRT	glmGamPoi	scranSumFactors
Cyba	3dpi	-2.73283		54.5336	1.42896e-09	7.3224e-07	-6.05218	-4.95261	246.415	pseudobulk	DESeq2	LRT	glmGamPoi	scranSumFactors
Cd81	3dpi	-1.61044		4147.61	1.49194e-09	7.3224e-07	-6.04523	-4.95261	244.633	pseudobulk	DESeq2	LRT	glmGamPoi	scranSumFactors
Fjx1	3dpi	-1.45325		245.011	1.51419e-09	7.3224e-07	-6.04285	-4.95261	244.024	pseudobulk	DESeq2	LRT	glmGamPoi	scranSumFactors
Rps26	3dpi	-1.85008		1154.76	1.52672e-09	7.3224e-07	-6.04152	-4.95261	243.685	pseudobulk	DESeq2	LRT	glmGamPoi	scranSumFactors
ENSMUSG00000108943	3dpi	0.948471		661.275	1.60409e-09	7.3224e-07	6.03354	4.95261	241.665	pseudobulk	DESeq2	LRT	glmGamPoi	scranSumFactors
Naa38	3dpi	-1.70648		215.539	1.64485e-09	7.3224e-07	-6.02948	-4.95261	240.646	pseudobulk	DESeq2	LRT	glmGamPoi	scranSumFactors
Tcf25	3dpi	-1.29274		1185.36	1.72745e-09	7.3224e-07	-6.02156	-4.95261	238.667	pseudobulk	DESeq2	LRT	glmGamPoi	scranSumFactors
Ndufa1	3dpi	-2.0134		613.032	1.73174e-09	7.3224e-07	-6.02116	-4.95261	238.567	pseudobulk	DESeq2	LRT	glmGamPoi	scranSumFactors
Tmem256	3dpi	-1.08642		462.604	1.758e-09	7.3224e-07	-6.01872	-4.95261	237.963	pseudobulk	DESeq2	LRT	glmGamPoi	scranSumFactors
Ndufb3	3dpi	-1.28271		931.503	1.76208e-09	7.3224e-07	-6.01835	-4.95261	237.87	pseudobulk	DESeq2	LRT	glmGamPoi	scranSumFactors
Traf5	3dpi	-1.78769		653.433	1.76736e-09	7.3224e-07	-6.01786	-4.95261	237.75	pseudobulk	DESeq2	LRT	glmGamPoi	scranSumFactors
Atp5e	3dpi	-2.10184		911.008	1.80912e-09	7.32293e-07	-6.01408	-4.9526	236.816	pseudobulk	DESeq2	LRT	glmGamPoi	scranSumFactors
Pltp	3dpi	-2.11865		108.155	1.8368e-09	7.32293e-07	-6.01162	-4.9526	236.211	pseudobulk	DESeq2	LRT	glmGamPoi	scranSumFactors
Snrpf	3dpi	-1.31661		430.446	1.87573e-09	7.33182e-07	-6.00822	-4.95236	235.377	pseudobulk	DESeq2	LRT	glmGamPoi	scranSumFactors
Gm2a	3dpi	-1.30089		204.782	1.92224e-09	7.33182e-07	-6.00425	-4.95236	234.406	pseudobulk	DESeq2	LRT	glmGamPoi	scranSumFactors
Pglyrp3	3dpi	-2.68085		96.5214	1.94312e-09	7.33182e-07	-6.00249	-4.95236	233.979	pseudobulk	DESeq2	LRT	glmGamPoi	scranSumFactors
H2bc4	3dpi	-1.84043		142.902	2.05329e-09	7.61159e-07	-5.99353	-4.94507	231.812	pseudobulk	DESeq2	LRT	glmGamPoi	scranSumFactors
Atox1	3dpi	-1.47008		465.402	2.15342e-09	7.84514e-07	-5.98579	-4.93918	229.957	pseudobulk	DESeq2	LRT	glmGamPoi	scranSumFactors
Cldn10	3dpi	-2.32896		522.166	2.21283e-09	7.92494e-07	-5.98136	-4.93721	228.903	pseudobulk	DESeq2	LRT	glmGamPoi	scranSumFactors
Ndufab1	3dpi	-1.64094		1037.04	2.26025e-09	7.95983e-07	-5.97791	-4.93635	228.085	pseudobulk	DESeq2	LRT	glmGamPoi	scranSumFactors
Itm2a	3dpi	-1.71999		127.748	2.44813e-09	8.48018e-07	-5.96488	-4.92398	225.028	pseudobulk	DESeq2	LRT	glmGamPoi	scranSumFactors
Rpl41	3dpi	-1.5952		3160.87	2.5606e-09	8.57802e-07	-5.95754	-4.92174	223.326	pseudobulk	DESeq2	LRT	glmGamPoi	scranSumFactors
Atp5l	3dpi	-1.47363		1458	2.62291e-09	8.57802e-07	-5.95361	-4.92174	222.42	pseudobulk	DESeq2	LRT	glmGamPoi	scranSumFactors
Slc38a3	3dpi	-2.09919		141.554	2.62962e-09	8.57802e-07	-5.95319	-4.92174	222.324	pseudobulk	DESeq2	LRT	glmGamPoi	scranSumFactors
ENSMUSG00000097428	3dpi	-2.28127		145.048	2.63877e-09	8.57802e-07	-5.95262	-4.92174	222.194	pseudobulk	DESeq2	LRT	glmGamPoi	scranSumFactors
Rpl37a	3dpi	-1.57757		1492.08	2.811e-09	8.80515e-07	-5.94227	-4.91662	219.83	pseudobulk	DESeq2	LRT	glmGamPoi	scranSumFactors
Oaz1	3dpi	-1.35909		1651.79	2.82109e-09	8.80515e-07	-5.94168	-4.91662	219.697	pseudobulk	DESeq2	LRT	glmGamPoi	scranSumFactors
Rpl35a	3dpi	-1.74704		1422.65	2.83719e-09	8.80515e-07	-5.94075	-4.91662	219.485	pseudobulk	DESeq2	LRT	glmGamPoi	scranSumFactors
Mid1ip1	3dpi	-1.49057		332.552	2.87532e-09	8.80515e-07	-5.93856	-4.91662	218.99	pseudobulk	DESeq2	LRT	glmGamPoi	scranSumFactors
Bola2	3dpi	-1.59245		266.008	2.96816e-09	8.84128e-07	-5.93335	-4.91582	217.815	pseudobulk	DESeq2	LRT	glmGamPoi	scranSumFactors
S100a1	3dpi	-2.34041		199.701	2.98939e-09	8.84128e-07	-5.93218	-4.91582	217.553	pseudobulk	DESeq2	LRT	glmGamPoi	scranSumFactors
Uqcrfs1	3dpi	-1.55859		573.527	3.01265e-09	8.84128e-07	-5.93091	-4.91582	217.267	pseudobulk	DESeq2	LRT	glmGamPoi	scranSumFactors
ENSMUSG00000044285	3dpi	-2.14726		1263.3	3.08359e-09	8.92551e-07	-5.92709	-4.91396	216.413	pseudobulk	DESeq2	LRT	glmGamPoi	scranSumFactors
Gpr37l1	3dpi	-2.24391		792.531	3.27493e-09	9.32683e-07	-5.91719	-4.90533	214.217	pseudobulk	DESeq2	LRT	glmGamPoi	scranSumFactors
Rps16	3dpi	-1.7466		954.605	3.31052e-09	9.32683e-07	-5.91541	-4.90533	213.825	pseudobulk	DESeq2	LRT	glmGamPoi	scranSumFactors
Fndc7	3dpi	-1.29156		211.932	3.39694e-09	9.35015e-07	-5.91117	-4.90484	212.894	pseudobulk	DESeq2	LRT	glmGamPoi	scranSumFactors
Rplp2	3dpi	-1.69775		1564.1	3.4073e-09	9.35015e-07	-5.91066	-4.90484	212.784	pseudobulk	DESeq2	LRT	glmGamPoi	scranSumFactors
Zfp706	3dpi	-1.2603		473.679	3.48956e-09	9.45312e-07	-5.90673	-4.90269	211.925	pseudobulk	DESeq2	LRT	glmGamPoi	scranSumFactors
Ndufa5	3dpi	-1.71036		1103.83	3.53571e-09	9.4569e-07	-5.90457	-4.90262	211.454	pseudobulk	DESeq2	LRT	glmGamPoi	scranSumFactors
1700030F04Rik	3dpi	-1.0242		1401.64	3.73868e-09	9.53513e-07	-5.89536	-4.901	209.462	pseudobulk	DESeq2	LRT	glmGamPoi	scranSumFactors
Ddx3y	3dpi	-2.43335		67.0728	3.77704e-09	9.53513e-07	-5.89367	-4.901	209.099	pseudobulk	DESeq2	LRT	glmGamPoi	scranSumFactors
Tmem258	3dpi	-1.59689		518.002	3.789e-09	9.53513e-07	-5.89315	-4.901	208.987	pseudobulk	DESeq2	LRT	glmGamPoi	scranSumFactors
Cfap77	3dpi	-2.35415		2689.99	3.81177e-09	9.53513e-07	-5.89216	-4.901	208.775	pseudobulk	DESeq2	LRT	glmGamPoi	scranSumFactors
Fau	3dpi	-1.91034		2266.47	3.81554e-09	9.53513e-07	-5.892	-4.901	208.74	pseudobulk	DESeq2	LRT	glmGamPoi	scranSumFactors
Rps28	3dpi	-1.8569		730.176	3.84527e-09	9.53513e-07	-5.89072	-4.901	208.465	pseudobulk	DESeq2	LRT	glmGamPoi	scranSumFactors
ENSMUSG00000111414	3dpi	-1.72724		128.231	3.91814e-09	9.53513e-07	-5.88761	-4.901	207.802	pseudobulk	DESeq2	LRT	glmGamPoi	scranSumFactors
Selenof	3dpi	-1.08011		1197.83	3.92596e-09	9.53513e-07	-5.88728	-4.901	207.732	pseudobulk	DESeq2	LRT	glmGamPoi	scranSumFactors
Rps10	3dpi	-1.83372		1383.78	4.03891e-09	9.65495e-07	-5.88259	-4.89854	206.735	pseudobulk	DESeq2	LRT	glmGamPoi	scranSumFactors
Rpl27	3dpi	-1.88022		861.518	4.06668e-09	9.65495e-07	-5.88146	-4.89854	206.494	pseudobulk	DESeq2	LRT	glmGamPoi	scranSumFactors
Rps27rt	3dpi	-1.51596		551.36	4.14645e-09	9.68853e-07	-5.87824	-4.89786	205.814	pseudobulk	DESeq2	LRT	glmGamPoi	scranSumFactors
Ptn	3dpi	-1.27447		2855.5	4.17253e-09	9.68853e-07	-5.8772	-4.89786	205.596	pseudobulk	DESeq2	LRT	glmGamPoi	scranSumFactors
Fabp5	3dpi	-1.74018		961.346	4.30421e-09	9.78938e-07	-5.87206	-4.89583	204.514	pseudobulk	DESeq2	LRT	glmGamPoi	scranSumFactors
Vcam1	3dpi	-2.22411		130.507	4.30862e-09	9.78938e-07	-5.87189	-4.89583	204.478	pseudobulk	DESeq2	LRT	glmGamPoi	scranSumFactors
Ctsz	3dpi	-1.49036		174.368	4.39675e-09	9.88332e-07	-5.86853	-4.89395	203.776	pseudobulk	DESeq2	LRT	glmGamPoi	scranSumFactors
Krtcap2	3dpi	-1.48889		781.952	4.55479e-09	1.01183e-06	-5.86267	-4.88932	202.557	pseudobulk	DESeq2	LRT	glmGamPoi	scranSumFactors
Selenos	3dpi	-1.10012		606.99	4.59705e-09	1.01183e-06	-5.86114	-4.88932	202.24	pseudobulk	DESeq2	LRT	glmGamPoi	scranSumFactors
ENSMUSG00000083440	3dpi	-1.88767		608.362	4.77184e-09	1.03947e-06	-5.85494	-4.88401	200.961	pseudobulk	DESeq2	LRT	glmGamPoi	scranSumFactors
Rps13	3dpi	-1.63889		1043.49	4.84e-09	1.04356e-06	-5.85258	-4.88324	200.477	pseudobulk	DESeq2	LRT	glmGamPoi	scranSumFactors
Pla2g7	3dpi	-1.78291		832.735	5.04763e-09	1.07734e-06	-5.84559	-4.87696	199.05	pseudobulk	DESeq2	LRT	glmGamPoi	scranSumFactors
Ppia	3dpi	-1.98277		5256.7	5.24377e-09	1.10801e-06	-5.83925	-4.87142	197.764	pseudobulk	DESeq2	LRT	glmGamPoi	scranSumFactors
Rpl28	3dpi	-1.85988		986.088	5.43455e-09	1.12237e-06	-5.83329	-4.86887	196.565	pseudobulk	DESeq2	LRT	glmGamPoi	scranSumFactors
Rpl30	3dpi	-1.50835		1044.99	5.4609e-09	1.12237e-06	-5.83248	-4.86887	196.403	pseudobulk	DESeq2	LRT	glmGamPoi	scranSumFactors
Cox8a	3dpi	-1.662		3370.26	5.47108e-09	1.12237e-06	-5.83217	-4.86887	196.341	pseudobulk	DESeq2	LRT	glmGamPoi	scranSumFactors
Eno1	3dpi	-1.31909		1383.64	5.65229e-09	1.13982e-06	-5.82673	-4.86582	195.255	pseudobulk	DESeq2	LRT	glmGamPoi	scranSumFactors
Ndufc1	3dpi	-1.85054		930.284	5.69835e-09	1.13982e-06	-5.82538	-4.86582	194.985	pseudobulk	DESeq2	LRT	glmGamPoi	scranSumFactors
Ndufb4	3dpi	-1.95624		567.369	5.71798e-09	1.13982e-06	-5.8248	-4.86582	194.871	pseudobulk	DESeq2	LRT	glmGamPoi	scranSumFactors
Ndufb11	3dpi	-1.68313		952.06	5.79685e-09	1.14474e-06	-5.82252	-4.86497	194.417	pseudobulk	DESeq2	LRT	glmGamPoi	scranSumFactors
Tomm7	3dpi	-1.90354		572.599	6.14403e-09	1.20207e-06	-5.81279	-4.8553	192.5	pseudobulk	DESeq2	LRT	glmGamPoi	scranSumFactors
Laptm4a	3dpi	-1.07084		1095.57	6.35461e-09	1.23186e-06	-5.80715	-4.85044	191.398	pseudobulk	DESeq2	LRT	glmGamPoi	scranSumFactors
Rpl22l1	3dpi	-1.67354		1513.44	6.69795e-09	1.26718e-06	-5.79833	-4.84483	189.688	pseudobulk	DESeq2	LRT	glmGamPoi	scranSumFactors
Ndufc2	3dpi	-1.60827		1718.73	6.71001e-09	1.26718e-06	-5.79803	-4.84483	189.63	pseudobulk	DESeq2	LRT	glmGamPoi	scranSumFactors
Gstm5	3dpi	-1.81856		653.537	6.71671e-09	1.26718e-06	-5.79786	-4.84483	189.598	pseudobulk	DESeq2	LRT	glmGamPoi	scranSumFactors
Gm1043	3dpi	0.695748		1301.7	6.83296e-09	1.26944e-06	5.79498	4.84448	189.044	pseudobulk	DESeq2	LRT	glmGamPoi	scranSumFactors
Atp5mpl	3dpi	-1.78401		905.53	6.84885e-09	1.26944e-06	-5.79459	-4.84448	188.969	pseudobulk	DESeq2	LRT	glmGamPoi	scranSumFactors
Ech1	3dpi	-1.14073		219.852	6.92398e-09	1.27221e-06	-5.79276	-4.84405	188.618	pseudobulk	DESeq2	LRT	glmGamPoi	scranSumFactors
Rpl9-ps6	3dpi	-1.28898		514.809	7.07954e-09	1.28083e-06	-5.78903	-4.84271	187.904	pseudobulk	DESeq2	LRT	glmGamPoi	scranSumFactors
Mmp14	3dpi	-2.10001		70.9487	7.12014e-09	1.28083e-06	-5.78807	-4.84271	187.721	pseudobulk	DESeq2	LRT	glmGamPoi	scranSumFactors
Ndufa2	3dpi	-1.63216		855.027	7.20199e-09	1.28083e-06	-5.78615	-4.84271	187.355	pseudobulk	DESeq2	LRT	glmGamPoi	scranSumFactors
H2aj	3dpi	-1.07526		637.211	7.23697e-09	1.28083e-06	-5.78533	-4.84271	187.2	pseudobulk	DESeq2	LRT	glmGamPoi	scranSumFactors
Slc9a3r1	3dpi	-1.80958		78.266	7.274e-09	1.28083e-06	-5.78447	-4.84271	187.037	pseudobulk	DESeq2	LRT	glmGamPoi	scranSumFactors
Cox6b1	3dpi	-1.73698		1595.63	7.38815e-09	1.29018e-06	-5.78185	-4.84126	186.541	pseudobulk	DESeq2	LRT	glmGamPoi	scranSumFactors
Cd9	3dpi	-1.69607		813.653	7.5249e-09	1.30329e-06	-5.77877	-4.83925	185.958	pseudobulk	DESeq2	LRT	glmGamPoi	scranSumFactors
Rps8	3dpi	-1.71347		2539.12	7.99815e-09	1.37399e-06	-5.7685	-4.82874	184.031	pseudobulk	DESeq2	LRT	glmGamPoi	scranSumFactors
Rpl36	3dpi	-1.61802		1478.06	8.12739e-09	1.37544e-06	-5.76579	-4.82853	183.527	pseudobulk	DESeq2	LRT	glmGamPoi	scranSumFactors
Dynll1	3dpi	-1.46784		1473.78	8.1368e-09	1.37544e-06	-5.7656	-4.82853	183.491	pseudobulk	DESeq2	LRT	glmGamPoi	scranSumFactors
Rpl24	3dpi	-1.79101		1595.49	8.26065e-09	1.3853e-06	-5.76305	-4.82711	183.018	pseudobulk	DESeq2	LRT	glmGamPoi	scranSumFactors
Rpl36al	3dpi	-1.88156		767.757	8.36592e-09	1.39191e-06	-5.76091	-4.82616	182.622	pseudobulk	DESeq2	LRT	glmGamPoi	scranSumFactors
Rpl27a	3dpi	-1.6059		1582.72	8.54989e-09	1.3972e-06	-5.75724	-4.8254	181.945	pseudobulk	DESeq2	LRT	glmGamPoi	scranSumFactors
H3f3a	3dpi	-0.927074		1102.36	8.55464e-09	1.3972e-06	-5.75715	-4.8254	181.927	pseudobulk	DESeq2	LRT	glmGamPoi	scranSumFactors
Ckb	3dpi	-1.42581		4327.19	8.59612e-09	1.3972e-06	-5.75633	-4.8254	181.777	pseudobulk	DESeq2	LRT	glmGamPoi	scranSumFactors
Elob	3dpi	-1.80825		1801.52	8.71059e-09	1.405e-06	-5.7541	-4.82429	181.366	pseudobulk	DESeq2	LRT	glmGamPoi	scranSumFactors
Rps17	3dpi	-1.74161		713.934	8.80314e-09	1.40917e-06	-5.75231	-4.8237	181.039	pseudobulk	DESeq2	LRT	glmGamPoi	scranSumFactors
Rps23	3dpi	-1.67107		806.098	8.99275e-09	1.4287e-06	-5.74871	-4.82096	180.38	pseudobulk	DESeq2	LRT	glmGamPoi	scranSumFactors
Romo1	3dpi	-1.92913		551.313	9.13903e-09	1.4411e-06	-5.74598	-4.81923	179.883	pseudobulk	DESeq2	LRT	glmGamPoi	scranSumFactors
Mlc1	3dpi	-1.82481		253.064	9.38025e-09	1.46818e-06	-5.74157	-4.81552	179.083	pseudobulk	DESeq2	LRT	glmGamPoi	scranSumFactors
Ndufa6	3dpi	-1.45117		1221.44	9.50097e-09	1.47614e-06	-5.73941	-4.81444	178.692	pseudobulk	DESeq2	LRT	glmGamPoi	scranSumFactors
Mrpl30	3dpi	-1.34669		367.497	9.70986e-09	1.47904e-06	-5.73572	-4.81405	178.028	pseudobulk	DESeq2	LRT	glmGamPoi	scranSumFactors
Cox7a2	3dpi	-1.59051		1668.72	9.80544e-09	1.47904e-06	-5.73406	-4.81405	177.73	pseudobulk	DESeq2	LRT	glmGamPoi	scranSumFactors
Gm40271	3dpi	-1.9795		113.378	9.81852e-09	1.47904e-06	-5.73383	-4.81405	177.689	pseudobulk	DESeq2	LRT	glmGamPoi	scranSumFactors
Aldoa	3dpi	-1.6444		3215.35	1.00488e-08	1.47904e-06	-5.7299	-4.81405	176.985	pseudobulk	DESeq2	LRT	glmGamPoi	scranSumFactors
Hspa2	3dpi	-1.78361		75.6658	1.01598e-08	1.47904e-06	-5.72804	-4.81405	176.653	pseudobulk	DESeq2	LRT	glmGamPoi	scranSumFactors
Id3	3dpi	-2.48715		204.549	1.02396e-08	1.47904e-06	-5.72671	-4.81405	176.416	pseudobulk	DESeq2	LRT	glmGamPoi	scranSumFactors
Rps20	3dpi	-1.35955		1027.55	1.0251e-08	1.47904e-06	-5.72652	-4.81405	176.382	pseudobulk	DESeq2	LRT	glmGamPoi	scranSumFactors
Rps25	3dpi	-1.66791		851.265	1.03028e-08	1.47904e-06	-5.72567	-4.81405	176.23	pseudobulk	DESeq2	LRT	glmGamPoi	scranSumFactors
Rps27	3dpi	-1.4313		707.914	1.03061e-08	1.47904e-06	-5.72561	-4.81405	176.221	pseudobulk	DESeq2	LRT	glmGamPoi	scranSumFactors
Pon2	3dpi	-1.51056		156.9	1.04051e-08	1.47904e-06	-5.72399	-4.81405	175.932	pseudobulk	DESeq2	LRT	glmGamPoi	scranSumFactors
Zmat2	3dpi	-1.21445		631.28	1.04498e-08	1.47904e-06	-5.72326	-4.81405	175.803	pseudobulk	DESeq2	LRT	glmGamPoi	scranSumFactors
Phgdh	3dpi	-1.76755		290.452	1.05652e-08	1.47904e-06	-5.7214	-4.81405	175.473	pseudobulk	DESeq2	LRT	glmGamPoi	scranSumFactors
Atp5g2	3dpi	-1.23266		689.369	1.06393e-08	1.47904e-06	-5.72021	-4.81405	175.263	pseudobulk	DESeq2	LRT	glmGamPoi	scranSumFactors
Smdt1	3dpi	-1.36187		876.582	1.06439e-08	1.47904e-06	-5.72014	-4.81405	175.25	pseudobulk	DESeq2	LRT	glmGamPoi	scranSumFactors
Rpl36a	3dpi	-1.88878		249.632	1.06757e-08	1.47904e-06	-5.71963	-4.81405	175.16	pseudobulk	DESeq2	LRT	glmGamPoi	scranSumFactors
Snrpg	3dpi	-1.28658		404.162	1.07064e-08	1.47904e-06	-5.71914	-4.81405	175.074	pseudobulk	DESeq2	LRT	glmGamPoi	scranSumFactors
Psmb3	3dpi	-1.38757		712.794	1.07095e-08	1.47904e-06	-5.71909	-4.81405	175.065	pseudobulk	DESeq2	LRT	glmGamPoi	scranSumFactors
Dbp	3dpi	-0.858787		448.424	1.07928e-08	1.48085e-06	-5.71778	-4.8138	174.833	pseudobulk	DESeq2	LRT	glmGamPoi	scranSumFactors
Ndufa4	3dpi	-1.73355		2808.54	1.08875e-08	1.48421e-06	-5.71629	-4.81335	174.572	pseudobulk	DESeq2	LRT	glmGamPoi	scranSumFactors
Uqcc2	3dpi	-1.62915		717.501	1.11692e-08	1.49501e-06	-5.71195	-4.8119	173.809	pseudobulk	DESeq2	LRT	glmGamPoi	scranSumFactors
Uqcrq	3dpi	-1.58977		1293.8	1.1208e-08	1.49501e-06	-5.71136	-4.8119	173.706	pseudobulk	DESeq2	LRT	glmGamPoi	scranSumFactors
Mgst1	3dpi	-2.44072		148.85	1.12397e-08	1.49501e-06	-5.71088	-4.8119	173.622	pseudobulk	DESeq2	LRT	glmGamPoi	scranSumFactors
Actb	3dpi	-1.43769		6369.76	1.12497e-08	1.49501e-06	-5.71072	-4.8119	173.595	pseudobulk	DESeq2	LRT	glmGamPoi	scranSumFactors
Sdhaf4	3dpi	-1.38967		234.498	1.14557e-08	1.51286e-06	-5.70764	-4.80953	173.056	pseudobulk	DESeq2	LRT	glmGamPoi	scranSumFactors
Atp5g1	3dpi	-1.618		1778.01	1.15433e-08	1.51497e-06	-5.70634	-4.80925	172.83	pseudobulk	DESeq2	LRT	glmGamPoi	scranSumFactors
Tagln3	3dpi	-1.48701		1146.11	1.17038e-08	1.52656e-06	-5.70398	-4.80773	172.421	pseudobulk	DESeq2	LRT	glmGamPoi	scranSumFactors
Fth1	3dpi	-1.41429		6158.8	1.20444e-08	1.54663e-06	-5.6991	-4.80511	171.575	pseudobulk	DESeq2	LRT	glmGamPoi	scranSumFactors
Rps24	3dpi	-1.4216		1983.91	1.21185e-08	1.54663e-06	-5.69805	-4.80511	171.394	pseudobulk	DESeq2	LRT	glmGamPoi	scranSumFactors
Cfl1	3dpi	-1.60297		1351.12	1.22038e-08	1.54663e-06	-5.69685	-4.80511	171.188	pseudobulk	DESeq2	LRT	glmGamPoi	scranSumFactors
Spr	3dpi	-1.2603		217.685	1.22391e-08	1.54663e-06	-5.69636	-4.80511	171.103	pseudobulk	DESeq2	LRT	glmGamPoi	scranSumFactors
Ddt	3dpi	-1.81663		324.05	1.23526e-08	1.54663e-06	-5.69479	-4.80511	170.832	pseudobulk	DESeq2	LRT	glmGamPoi	scranSumFactors
Cops9	3dpi	-1.49126		500.206	1.24576e-08	1.54663e-06	-5.69334	-4.80511	170.585	pseudobulk	DESeq2	LRT	glmGamPoi	scranSumFactors
Gm10175	3dpi	-1.71536		428.136	1.24712e-08	1.54663e-06	-5.69316	-4.80511	170.553	pseudobulk	DESeq2	LRT	glmGamPoi	scranSumFactors
Fdps	3dpi	-1.47487		442.638	1.24947e-08	1.54663e-06	-5.69283	-4.80511	170.497	pseudobulk	DESeq2	LRT	glmGamPoi	scranSumFactors
Rpl32	3dpi	-1.47869		1327.8	1.25643e-08	1.54663e-06	-5.69189	-4.80511	170.335	pseudobulk	DESeq2	LRT	glmGamPoi	scranSumFactors
Tsc22d4	3dpi	-0.912387		916.019	1.26168e-08	1.54663e-06	-5.69118	-4.80511	170.213	pseudobulk	DESeq2	LRT	glmGamPoi	scranSumFactors
S100a13	3dpi	-2.01402		161.102	1.26629e-08	1.54663e-06	-5.69055	-4.80511	170.107	pseudobulk	DESeq2	LRT	glmGamPoi	scranSumFactors
G630055G22Rik	3dpi	-1.30147		196.466	1.28486e-08	1.5523e-06	-5.68807	-4.80438	169.682	pseudobulk	DESeq2	LRT	glmGamPoi	scranSumFactors
Ptma	3dpi	-1.18177		1677.29	1.28563e-08	1.5523e-06	-5.68796	-4.80438	169.665	pseudobulk	DESeq2	LRT	glmGamPoi	scranSumFactors
Rps27a	3dpi	-1.77764		1468.2	1.30182e-08	1.56293e-06	-5.68583	-4.80302	169.3	pseudobulk	DESeq2	LRT	glmGamPoi	scranSumFactors
Rpl34	3dpi	-1.51544		979.817	1.30968e-08	1.56347e-06	-5.6848	-4.80295	169.126	pseudobulk	DESeq2	LRT	glmGamPoi	scranSumFactors
Cox4i1	3dpi	-1.75421		2258.58	1.33154e-08	1.58065e-06	-5.68197	-4.80076	168.645	pseudobulk	DESeq2	LRT	glmGamPoi	scranSumFactors
Calm2	3dpi	-1.15714		4569.76	1.35096e-08	1.59473e-06	-5.67949	-4.79898	168.227	pseudobulk	DESeq2	LRT	glmGamPoi	scranSumFactors
Rdh5	3dpi	-1.73824		250.76	1.37147e-08	1.60852e-06	-5.67691	-4.79726	167.792	pseudobulk	DESeq2	LRT	glmGamPoi	scranSumFactors
Rpl18	3dpi	-1.57953		1086.09	1.37786e-08	1.60852e-06	-5.67612	-4.79726	167.658	pseudobulk	DESeq2	LRT	glmGamPoi	scranSumFactors
Vmn2r-ps21	3dpi	-1.59357		94.2483	1.39006e-08	1.61385e-06	-5.67461	-4.7966	167.404	pseudobulk	DESeq2	LRT	glmGamPoi	scranSumFactors
Cox6c	3dpi	-1.70942		2149.39	1.40229e-08	1.61914e-06	-5.67311	-4.79594	167.152	pseudobulk	DESeq2	LRT	glmGamPoi	scranSumFactors
Sox9	3dpi	-2.06295		172.542	1.42864e-08	1.63639e-06	-5.66992	-4.79382	166.618	pseudobulk	DESeq2	LRT	glmGamPoi	scranSumFactors
Chchd1	3dpi	-1.00515		425.893	1.43271e-08	1.63639e-06	-5.66943	-4.79382	166.537	pseudobulk	DESeq2	LRT	glmGamPoi	scranSumFactors
Gstm1	3dpi	-1.71568		218.665	1.44599e-08	1.63908e-06	-5.66785	-4.79349	166.273	pseudobulk	DESeq2	LRT	glmGamPoi	scranSumFactors
Grcc10	3dpi	-1.75332		562.637	1.45058e-08	1.63908e-06	-5.66731	-4.79349	166.182	pseudobulk	DESeq2	LRT	glmGamPoi	scranSumFactors
Igsf8	3dpi	-0.852226		1932.33	1.45989e-08	1.64082e-06	-5.66621	-4.79327	166	pseudobulk	DESeq2	LRT	glmGamPoi	scranSumFactors
Dynlrb1	3dpi	-1.30917		632.832	1.47395e-08	1.64786e-06	-5.66457	-4.79241	165.726	pseudobulk	DESeq2	LRT	glmGamPoi	scranSumFactors
Ptprn2	3dpi	0.697371		8895.35	1.48276e-08	1.64898e-06	5.66355	4.79228	165.557	pseudobulk	DESeq2	LRT	glmGamPoi	scranSumFactors
Hint2	3dpi	-1.0945		303.791	1.52018e-08	1.68175e-06	-5.65927	-4.78833	164.849	pseudobulk	DESeq2	LRT	glmGamPoi	scranSumFactors
Aqp4	3dpi	-2.36399		342	1.5828e-08	1.74191e-06	-5.65234	-4.78127	163.708	pseudobulk	DESeq2	LRT	glmGamPoi	scranSumFactors
Tlr3	3dpi	-2.05458		60.4534	1.62059e-08	1.76548e-06	-5.64828	-4.77857	163.044	pseudobulk	DESeq2	LRT	glmGamPoi	scranSumFactors
Rplp1	3dpi	-1.46371		2490.39	1.62093e-08	1.76548e-06	-5.64825	-4.77857	163.038	pseudobulk	DESeq2	LRT	glmGamPoi	scranSumFactors
Ndufv3	3dpi	-1.26149		776.919	1.6387e-08	1.77568e-06	-5.64637	-4.77741	162.733	pseudobulk	DESeq2	LRT	glmGamPoi	scranSumFactors
Rasgrf1	3dpi	0.593258		5325.5	1.67472e-08	1.80545e-06	5.64263	4.77406	162.125	pseudobulk	DESeq2	LRT	glmGamPoi	scranSumFactors
Ndufb7	3dpi	-1.57605		784.589	1.70553e-08	1.82934e-06	-5.63949	-4.77142	161.616	pseudobulk	DESeq2	LRT	glmGamPoi	scranSumFactors
Prdx5	3dpi	-1.40553		1145.75	1.72492e-08	1.84079e-06	-5.63754	-4.77016	161.302	pseudobulk	DESeq2	LRT	glmGamPoi	scranSumFactors
Ndufb2	3dpi	-1.26587		1112.41	1.78117e-08	1.89126e-06	-5.63201	-4.76471	160.413	pseudobulk	DESeq2	LRT	glmGamPoi	scranSumFactors
Acadl	3dpi	-1.36898		178.986	1.81633e-08	1.91895e-06	-5.62864	-4.76178	159.873	pseudobulk	DESeq2	LRT	glmGamPoi	scranSumFactors
Wdr83os	3dpi	-1.50686		397.108	1.83577e-08	1.92984e-06	-5.62681	-4.76064	159.58	pseudobulk	DESeq2	LRT	glmGamPoi	scranSumFactors
Dhrs7	3dpi	-1.51965		275.561	1.86526e-08	1.94524e-06	-5.62406	-4.75903	159.143	pseudobulk	DESeq2	LRT	glmGamPoi	scranSumFactors
Rpl18a	3dpi	-1.71122		1060.01	1.86883e-08	1.94524e-06	-5.62372	-4.75903	159.09	pseudobulk	DESeq2	LRT	glmGamPoi	scranSumFactors
Gsdme	3dpi	-0.956493		1109.08	1.90801e-08	1.96861e-06	-5.62014	-4.75662	158.522	pseudobulk	DESeq2	LRT	glmGamPoi	scranSumFactors
Gja1	3dpi	-2.15902		712.158	1.90991e-08	1.96861e-06	-5.61997	-4.75662	158.495	pseudobulk	DESeq2	LRT	glmGamPoi	scranSumFactors
Gm11808	3dpi	-1.57754		547.13	1.97945e-08	2.02607e-06	-5.61379	-4.75081	157.52	pseudobulk	DESeq2	LRT	glmGamPoi	scranSumFactors
Mrps33	3dpi	-1.3375		606.826	1.99251e-08	2.02607e-06	-5.61265	-4.75081	157.342	pseudobulk	DESeq2	LRT	glmGamPoi	scranSumFactors
Tmsb10	3dpi	-2.01414		3025.43	1.99443e-08	2.02607e-06	-5.61248	-4.75081	157.315	pseudobulk	DESeq2	LRT	glmGamPoi	scranSumFactors
Mrps14	3dpi	-1.05092		550.732	2.0255e-08	2.04196e-06	-5.60981	-4.74923	156.896	pseudobulk	DESeq2	LRT	glmGamPoi	scranSumFactors
Uqcrh	3dpi	-1.07002		1313.37	2.0294e-08	2.04196e-06	-5.60948	-4.74923	156.844	pseudobulk	DESeq2	LRT	glmGamPoi	scranSumFactors
Ubl5	3dpi	-1.82152		1070.02	2.07268e-08	2.0665e-06	-5.60582	-4.74681	156.274	pseudobulk	DESeq2	LRT	glmGamPoi	scranSumFactors
Ndufb6	3dpi	-1.52284		580.98	2.07866e-08	2.0665e-06	-5.60532	-4.74681	156.196	pseudobulk	DESeq2	LRT	glmGamPoi	scranSumFactors
Rpl29	3dpi	-1.34326		725.267	2.09837e-08	2.0665e-06	-5.60369	-4.74681	155.942	pseudobulk	DESeq2	LRT	glmGamPoi	scranSumFactors
Ndufa7	3dpi	-1.56568		1008.33	2.10429e-08	2.0665e-06	-5.6032	-4.74681	155.866	pseudobulk	DESeq2	LRT	glmGamPoi	scranSumFactors
Polr1d	3dpi	-0.843616		501.959	2.11436e-08	2.0665e-06	-5.60237	-4.74681	155.738	pseudobulk	DESeq2	LRT	glmGamPoi	scranSumFactors
Sec61g	3dpi	-1.37231		204.648	2.11568e-08	2.0665e-06	-5.60227	-4.74681	155.721	pseudobulk	DESeq2	LRT	glmGamPoi	scranSumFactors
Son	3dpi	-0.72216		4614.07	2.12224e-08	2.0665e-06	-5.60173	-4.74681	155.638	pseudobulk	DESeq2	LRT	glmGamPoi	scranSumFactors
Cox5a	3dpi	-1.46959		2094.76	2.15492e-08	2.08495e-06	-5.59908	-4.74501	155.228	pseudobulk	DESeq2	LRT	glmGamPoi	scranSumFactors
Majin	3dpi	-1.30046		129.608	2.16092e-08	2.08495e-06	-5.5986	-4.74501	155.153	pseudobulk	DESeq2	LRT	glmGamPoi	scranSumFactors
Meg3	3dpi	0.606317		101203	2.18992e-08	2.09754e-06	5.59629	4.74379	154.796	pseudobulk	DESeq2	LRT	glmGamPoi	scranSumFactors
Rpl13	3dpi	-1.82578		1612.33	2.19487e-08	2.09754e-06	-5.59589	-4.74379	154.736	pseudobulk	DESeq2	LRT	glmGamPoi	scranSumFactors
Rpl11	3dpi	-1.45898		1622.81	2.20376e-08	2.09754e-06	-5.59519	-4.74379	154.628	pseudobulk	DESeq2	LRT	glmGamPoi	scranSumFactors
Nol7	3dpi	-0.935849		482.473	2.25623e-08	2.13785e-06	-5.59111	-4.73994	154.001	pseudobulk	DESeq2	LRT	glmGamPoi	scranSumFactors
Shisa4	3dpi	-0.887541		1115.79	2.29108e-08	2.1542e-06	-5.58845	-4.73839	153.593	pseudobulk	DESeq2	LRT	glmGamPoi	scranSumFactors
Atp6v1f	3dpi	-1.6213		1058.57	2.29387e-08	2.1542e-06	-5.58824	-4.73839	153.561	pseudobulk	DESeq2	LRT	glmGamPoi	scranSumFactors
Emd	3dpi	-1.16435		183.502	2.31251e-08	2.16024e-06	-5.58683	-4.73783	153.346	pseudobulk	DESeq2	LRT	glmGamPoi	scranSumFactors
Ndufb9	3dpi	-1.44215		1140.12	2.32183e-08	2.16024e-06	-5.58613	-4.73783	153.24	pseudobulk	DESeq2	LRT	glmGamPoi	scranSumFactors
Tmem160	3dpi	-1.35254		242.99	2.33098e-08	2.16024e-06	-5.58545	-4.73783	153.136	pseudobulk	DESeq2	LRT	glmGamPoi	scranSumFactors
Phpt1	3dpi	-1.99877		236.223	2.4147e-08	2.22806e-06	-5.57931	-4.73156	152.204	pseudobulk	DESeq2	LRT	glmGamPoi	scranSumFactors
Thrsp	3dpi	-1.38379		110.965	2.42952e-08	2.23199e-06	-5.57825	-4.7312	152.043	pseudobulk	DESeq2	LRT	glmGamPoi	scranSumFactors
Polr2l	3dpi	-1.53203		299.948	2.4533e-08	2.23206e-06	-5.57655	-4.73119	151.787	pseudobulk	DESeq2	LRT	glmGamPoi	scranSumFactors
Rps15a	3dpi	-1.29388		868.518	2.46633e-08	2.23206e-06	-5.57563	-4.73119	151.648	pseudobulk	DESeq2	LRT	glmGamPoi	scranSumFactors
Mrpl14	3dpi	-1.05665		305.271	2.47794e-08	2.23206e-06	-5.57481	-4.73119	151.525	pseudobulk	DESeq2	LRT	glmGamPoi	scranSumFactors
Cox5b	3dpi	-1.87861		1700.9	2.48127e-08	2.23206e-06	-5.57458	-4.73119	151.49	pseudobulk	DESeq2	LRT	glmGamPoi	scranSumFactors
Ftl1	3dpi	-1.37296		899.956	2.49191e-08	2.23206e-06	-5.57384	-4.73119	151.378	pseudobulk	DESeq2	LRT	glmGamPoi	scranSumFactors
Gpx4	3dpi	-1.5018		1326.75	2.49297e-08	2.23206e-06	-5.57376	-4.73119	151.367	pseudobulk	DESeq2	LRT	glmGamPoi	scranSumFactors
Rpl6	3dpi	-1.34351		1667.43	2.52025e-08	2.24696e-06	-5.57187	-4.72984	151.082	pseudobulk	DESeq2	LRT	glmGamPoi	scranSumFactors
Pigbos1	3dpi	-1.46874		117.666	2.53554e-08	2.25109e-06	-5.57081	-4.72947	150.924	pseudobulk	DESeq2	LRT	glmGamPoi	scranSumFactors
Ndufb8	3dpi	-1.50142		1339.49	2.5672e-08	2.26967e-06	-5.56865	-4.7278	150.6	pseudobulk	DESeq2	LRT	glmGamPoi	scranSumFactors
Psenen	3dpi	-1.49173		670.158	2.63582e-08	2.32062e-06	-5.56405	-4.72329	149.914	pseudobulk	DESeq2	LRT	glmGamPoi	scranSumFactors
Bri3	3dpi	-0.76487		717.366	2.673e-08	2.34358e-06	-5.56161	-4.72129	149.551	pseudobulk	DESeq2	LRT	glmGamPoi	scranSumFactors
Rps6kc1	3dpi	0.728125		930.717	2.72013e-08	2.37505e-06	5.55856	4.71857	149.099	pseudobulk	DESeq2	LRT	glmGamPoi	scranSumFactors
S100b	3dpi	-1.35193		430.993	2.74556e-08	2.38739e-06	-5.55693	-4.71752	148.859	pseudobulk	DESeq2	LRT	glmGamPoi	scranSumFactors
Rpl10-ps3	3dpi	-2.49585		222.85	2.80942e-08	2.43291e-06	-5.55292	-4.71367	148.268	pseudobulk	DESeq2	LRT	glmGamPoi	scranSumFactors
Mrpl36	3dpi	-1.43598		198.58	2.82777e-08	2.43881e-06	-5.55178	-4.71318	148.1	pseudobulk	DESeq2	LRT	glmGamPoi	scranSumFactors
Ost4	3dpi	-1.19939		354.632	2.85284e-08	2.44788e-06	-5.55024	-4.71242	147.874	pseudobulk	DESeq2	LRT	glmGamPoi	scranSumFactors
Rabac1	3dpi	-1.26619		2062.15	2.86854e-08	2.44788e-06	-5.54928	-4.71242	147.733	pseudobulk	DESeq2	LRT	glmGamPoi	scranSumFactors
Snrpe	3dpi	-1.20438		487.468	2.88567e-08	2.44788e-06	-5.54824	-4.71242	147.581	pseudobulk	DESeq2	LRT	glmGamPoi	scranSumFactors
Tspyl1	3dpi	-1.26619		381.194	2.88605e-08	2.44788e-06	-5.54821	-4.71242	147.578	pseudobulk	DESeq2	LRT	glmGamPoi	scranSumFactors
Coa3	3dpi	-1.61808		532.481	2.90165e-08	2.44788e-06	-5.54727	-4.71242	147.44	pseudobulk	DESeq2	LRT	glmGamPoi	scranSumFactors
Selenop	3dpi	-1.54961		467.301	2.90997e-08	2.44788e-06	-5.54677	-4.71242	147.367	pseudobulk	DESeq2	LRT	glmGamPoi	scranSumFactors
Rpl23a	3dpi	-1.51502		333.895	2.91938e-08	2.44788e-06	-5.5462	-4.71242	147.284	pseudobulk	DESeq2	LRT	glmGamPoi	scranSumFactors
Skp1	3dpi	-1.14653		775.302	2.99222e-08	2.49227e-06	-5.54189	-4.70876	146.656	pseudobulk	DESeq2	LRT	glmGamPoi	scranSumFactors
Slc39a1	3dpi	-1.05856		210.4	3.00305e-08	2.49227e-06	-5.54126	-4.70876	146.565	pseudobulk	DESeq2	LRT	glmGamPoi	scranSumFactors
Gabarap	3dpi	-1.34595		723.044	3.01403e-08	2.49227e-06	-5.54062	-4.70876	146.472	pseudobulk	DESeq2	LRT	glmGamPoi	scranSumFactors
Uqcr10	3dpi	-1.55856		1189.58	3.02336e-08	2.49227e-06	-5.54008	-4.70876	146.393	pseudobulk	DESeq2	LRT	glmGamPoi	scranSumFactors
Gng3	3dpi	-1.46567		1466.28	3.03597e-08	2.49227e-06	-5.53935	-4.70876	146.288	pseudobulk	DESeq2	LRT	glmGamPoi	scranSumFactors
Pfn1	3dpi	-1.49171		570.625	3.04309e-08	2.49227e-06	-5.53894	-4.70876	146.228	pseudobulk	DESeq2	LRT	glmGamPoi	scranSumFactors
Tomm22	3dpi	-1.14651		501.771	3.0741e-08	2.50795e-06	-5.53716	-4.70748	145.971	pseudobulk	DESeq2	LRT	glmGamPoi	scranSumFactors
Guk1	3dpi	-1.03814		586.465	3.23258e-08	2.6225e-06	-5.52835	-4.69837	144.704	pseudobulk	DESeq2	LRT	glmGamPoi	scranSumFactors
Lcat	3dpi	-2.16433		91.5372	3.24774e-08	2.6225e-06	-5.52753	-4.69837	144.586	pseudobulk	DESeq2	LRT	glmGamPoi	scranSumFactors
Fabp3	3dpi	-1.29864		410.47	3.25175e-08	2.6225e-06	-5.52731	-4.69837	144.555	pseudobulk	DESeq2	LRT	glmGamPoi	scranSumFactors
Ndufa11	3dpi	-1.75585		1095.07	3.27584e-08	2.63188e-06	-5.52602	-4.69764	144.37	pseudobulk	DESeq2	LRT	glmGamPoi	scranSumFactors
Rbx1	3dpi	-0.867186		1027.86	3.33489e-08	2.66917e-06	-5.52288	-4.69476	143.923	pseudobulk	DESeq2	LRT	glmGamPoi	scranSumFactors
Tmbim4	3dpi	-1.06705		752.053	3.35601e-08	2.67594e-06	-5.52177	-4.69424	143.766	pseudobulk	DESeq2	LRT	glmGamPoi	scranSumFactors
Pfdn5	3dpi	-1.24981		936.35	3.39707e-08	2.69224e-06	-5.51963	-4.693	143.462	pseudobulk	DESeq2	LRT	glmGamPoi	scranSumFactors
Nfe2l2	3dpi	-1.02783		193.356	3.42042e-08	2.69224e-06	-5.51843	-4.693	143.292	pseudobulk	DESeq2	LRT	glmGamPoi	scranSumFactors
Sh3bgrl3	3dpi	-1.55752		501.168	3.43436e-08	2.69224e-06	-5.51771	-4.693	143.191	pseudobulk	DESeq2	LRT	glmGamPoi	scranSumFactors
Rps11	3dpi	-1.46043		1406.46	3.45128e-08	2.69224e-06	-5.51685	-4.693	143.068	pseudobulk	DESeq2	LRT	glmGamPoi	scranSumFactors
Ndufb10	3dpi	-1.55919		975.492	3.46723e-08	2.69224e-06	-5.51604	-4.693	142.954	pseudobulk	DESeq2	LRT	glmGamPoi	scranSumFactors
Rpl26	3dpi	-1.43907		1223.02	3.48654e-08	2.69224e-06	-5.51506	-4.693	142.816	pseudobulk	DESeq2	LRT	glmGamPoi	scranSumFactors
Dad1	3dpi	-1.43535		1177.87	3.49736e-08	2.69224e-06	-5.51452	-4.693	142.739	pseudobulk	DESeq2	LRT	glmGamPoi	scranSumFactors
ENSMUSG00000097296	3dpi	-1.49137		85.2984	3.50489e-08	2.69224e-06	-5.51414	-4.693	142.686	pseudobulk	DESeq2	LRT	glmGamPoi	scranSumFactors
Mcee	3dpi	-1.00058		248.452	3.50769e-08	2.69224e-06	-5.514	-4.693	142.666	pseudobulk	DESeq2	LRT	glmGamPoi	scranSumFactors
Timm8b	3dpi	-1.43813		608.359	3.51005e-08	2.69224e-06	-5.51388	-4.693	142.649	pseudobulk	DESeq2	LRT	glmGamPoi	scranSumFactors
Fmc1	3dpi	-1.1364		390.449	3.51661e-08	2.69224e-06	-5.51355	-4.693	142.603	pseudobulk	DESeq2	LRT	glmGamPoi	scranSumFactors
Sumo2	3dpi	-0.920514		1507.3	3.53341e-08	2.69534e-06	-5.51271	-4.69277	142.485	pseudobulk	DESeq2	LRT	glmGamPoi	scranSumFactors
Psmb5	3dpi	-1.4921		686.415	3.5589e-08	2.70502e-06	-5.51145	-4.69203	142.307	pseudobulk	DESeq2	LRT	glmGamPoi	scranSumFactors
Nedd8	3dpi	-1.28135		1084.7	3.57629e-08	2.7085e-06	-5.51059	-4.69177	142.187	pseudobulk	DESeq2	LRT	glmGamPoi	scranSumFactors
Atp5o	3dpi	-1.66291		1205.16	3.59412e-08	2.71007e-06	-5.50972	-4.69165	142.064	pseudobulk	DESeq2	LRT	glmGamPoi	scranSumFactors
Serf2	3dpi	-1.00655		1200.23	3.61364e-08	2.71007e-06	-5.50876	-4.69165	141.93	pseudobulk	DESeq2	LRT	glmGamPoi	scranSumFactors
Rhoc	3dpi	-2.03081		47.2654	3.62626e-08	2.71007e-06	-5.50815	-4.69165	141.844	pseudobulk	DESeq2	LRT	glmGamPoi	scranSumFactors
Pdpn	3dpi	-2.07004		90.2564	3.64107e-08	2.71007e-06	-5.50743	-4.69165	141.744	pseudobulk	DESeq2	LRT	glmGamPoi	scranSumFactors
Uba52	3dpi	-1.50847		1002.15	3.6425e-08	2.71007e-06	-5.50736	-4.69165	141.734	pseudobulk	DESeq2	LRT	glmGamPoi	scranSumFactors
Glmp	3dpi	-1.38433		174.163	3.69248e-08	2.73762e-06	-5.50496	-4.68958	141.399	pseudobulk	DESeq2	LRT	glmGamPoi	scranSumFactors
Rps3a1	3dpi	-1.41304		1503.74	3.71251e-08	2.74284e-06	-5.50401	-4.68919	141.266	pseudobulk	DESeq2	LRT	glmGamPoi	scranSumFactors
Tpt1	3dpi	-1.44978		1707.44	3.81251e-08	2.80691e-06	-5.49932	-4.68447	140.614	pseudobulk	DESeq2	LRT	glmGamPoi	scranSumFactors
Zfp978	3dpi	-1.68741		104.886	3.84614e-08	2.82184e-06	-5.49777	-4.68338	140.4	pseudobulk	DESeq2	LRT	glmGamPoi	scranSumFactors
Dnmt3a	3dpi	0.536823		3368.62	3.86051e-08	2.82258e-06	5.49712	4.68333	140.309	pseudobulk	DESeq2	LRT	glmGamPoi	scranSumFactors
Tomm6	3dpi	-1.7992		651.235	3.88157e-08	2.82819e-06	-5.49616	-4.68292	140.176	pseudobulk	DESeq2	LRT	glmGamPoi	scranSumFactors
Edf1	3dpi	-1.19276		1012.32	3.92974e-08	2.84632e-06	-5.49398	-4.68161	139.876	pseudobulk	DESeq2	LRT	glmGamPoi	scranSumFactors
Sparcl1	3dpi	-1.20497		2968.74	3.93338e-08	2.84632e-06	-5.49382	-4.68161	139.853	pseudobulk	DESeq2	LRT	glmGamPoi	scranSumFactors
1110008P14Rik	3dpi	-1.28677		372.594	3.95373e-08	2.84709e-06	-5.49291	-4.68155	139.727	pseudobulk	DESeq2	LRT	glmGamPoi	scranSumFactors
Btf3	3dpi	-1.52966		620.021	3.96945e-08	2.84709e-06	-5.49221	-4.68155	139.631	pseudobulk	DESeq2	LRT	glmGamPoi	scranSumFactors
ENSMUSG00000111368	3dpi	-1.15291		349.319	3.97488e-08	2.84709e-06	-5.49196	-4.68155	139.598	pseudobulk	DESeq2	LRT	glmGamPoi	scranSumFactors
Btbd17	3dpi	-2.02588		195.598	4.08385e-08	2.91526e-06	-5.48719	-4.6767	138.942	pseudobulk	DESeq2	LRT	glmGamPoi	scranSumFactors
Tmco1	3dpi	-1.00004		692.83	4.10325e-08	2.91925e-06	-5.48635	-4.67642	138.828	pseudobulk	DESeq2	LRT	glmGamPoi	scranSumFactors
Atp6v1g1	3dpi	-1.29498		696.742	4.17114e-08	2.94793e-06	-5.48345	-4.67441	138.432	pseudobulk	DESeq2	LRT	glmGamPoi	scranSumFactors
Atp6v1e1	3dpi	-0.910284		924.472	4.1849e-08	2.94793e-06	-5.48287	-4.67441	138.352	pseudobulk	DESeq2	LRT	glmGamPoi	scranSumFactors
Srp14	3dpi	-1.0574		989.22	4.18933e-08	2.94793e-06	-5.48268	-4.67441	138.327	pseudobulk	DESeq2	LRT	glmGamPoi	scranSumFactors
Tmem205	3dpi	-0.88587		373.913	4.20248e-08	2.94793e-06	-5.48212	-4.67441	138.251	pseudobulk	DESeq2	LRT	glmGamPoi	scranSumFactors
Pdlim4	3dpi	-1.96597		72.7272	4.21333e-08	2.94793e-06	-5.48167	-4.67441	138.189	pseudobulk	DESeq2	LRT	glmGamPoi	scranSumFactors
Cycs	3dpi	-1.74932		966.596	4.28645e-08	2.97025e-06	-5.47862	-4.67287	137.776	pseudobulk	DESeq2	LRT	glmGamPoi	scranSumFactors
Ubxn1	3dpi	-0.940525		412.405	4.28675e-08	2.97025e-06	-5.47861	-4.67287	137.774	pseudobulk	DESeq2	LRT	glmGamPoi	scranSumFactors
Eif5a	3dpi	-1.3529		789.101	4.28949e-08	2.97025e-06	-5.4785	-4.67287	137.759	pseudobulk	DESeq2	LRT	glmGamPoi	scranSumFactors
Tpgs1	3dpi	-1.14769		255.75	4.30145e-08	2.97025e-06	-5.47801	-4.67287	137.692	pseudobulk	DESeq2	LRT	glmGamPoi	scranSumFactors
Tmem100	3dpi	-1.8255		81.236	4.31965e-08	2.9731e-06	-5.47726	-4.67267	137.591	pseudobulk	DESeq2	LRT	glmGamPoi	scranSumFactors
Fyb	3dpi	-1.45982		206.269	4.35754e-08	2.98203e-06	-5.47571	-4.67205	137.381	pseudobulk	DESeq2	LRT	glmGamPoi	scranSumFactors
Actg1	3dpi	-1.32295		1951.43	4.3671e-08	2.98203e-06	-5.47532	-4.67205	137.329	pseudobulk	DESeq2	LRT	glmGamPoi	scranSumFactors
Higd1a	3dpi	-1.04041		684.162	4.37496e-08	2.98203e-06	-5.47501	-4.67205	137.286	pseudobulk	DESeq2	LRT	glmGamPoi	scranSumFactors
C1qc	3dpi	-2.10744		67.4114	4.39958e-08	2.98917e-06	-5.47401	-4.67156	137.152	pseudobulk	DESeq2	LRT	glmGamPoi	scranSumFactors
Rplp0	3dpi	-1.33586		542.438	4.42733e-08	2.99838e-06	-5.4729	-4.67093	137.002	pseudobulk	DESeq2	LRT	glmGamPoi	scranSumFactors
Smim12	3dpi	-0.984054		322.597	4.45924e-08	3.00371e-06	-5.47163	-4.67057	136.83	pseudobulk	DESeq2	LRT	glmGamPoi	scranSumFactors
Rpl21	3dpi	-1.58139		2168.56	4.47041e-08	3.00371e-06	-5.47118	-4.67057	136.771	pseudobulk	DESeq2	LRT	glmGamPoi	scranSumFactors
Taldo1	3dpi	-1.14313		514.643	4.47784e-08	3.00371e-06	-5.47089	-4.67057	136.731	pseudobulk	DESeq2	LRT	glmGamPoi	scranSumFactors
Rpl31	3dpi	-1.75051		411.617	4.50113e-08	3.00977e-06	-5.46997	-4.67015	136.607	pseudobulk	DESeq2	LRT	glmGamPoi	scranSumFactors
Cox6a1	3dpi	-1.14		938.168	4.56041e-08	3.03368e-06	-5.46765	-4.66853	136.296	pseudobulk	DESeq2	LRT	glmGamPoi	scranSumFactors
Nhp2	3dpi	-1.57458		112.462	4.57897e-08	3.03368e-06	-5.46693	-4.66853	136.2	pseudobulk	DESeq2	LRT	glmGamPoi	scranSumFactors
Ttll11	3dpi	0.539989		1283.17	4.57996e-08	3.03368e-06	5.46689	4.66853	136.195	pseudobulk	DESeq2	LRT	glmGamPoi	scranSumFactors
Mif	3dpi	-1.97035		1621.76	4.63549e-08	3.06087e-06	-5.46475	-4.66669	135.909	pseudobulk	DESeq2	LRT	glmGamPoi	scranSumFactors
C1qb	3dpi	-2.21327		85.0734	4.72101e-08	3.10606e-06	-5.46151	-4.66368	135.476	pseudobulk	DESeq2	LRT	glmGamPoi	scranSumFactors
Prdx3	3dpi	-1.07554		304.838	4.73333e-08	3.10606e-06	-5.46105	-4.66368	135.414	pseudobulk	DESeq2	LRT	glmGamPoi	scranSumFactors
Rpl3	3dpi	-1.45654		1719.15	4.77351e-08	3.12273e-06	-5.45955	-4.66258	135.215	pseudobulk	DESeq2	LRT	glmGamPoi	scranSumFactors
Rpl19	3dpi	-1.65295		2269.07	4.83498e-08	3.15318e-06	-5.45727	-4.66058	134.913	pseudobulk	DESeq2	LRT	glmGamPoi	scranSumFactors
Hsd17b10	3dpi	-1.44798		118.173	4.88932e-08	3.17411e-06	-5.45529	-4.65922	134.651	pseudobulk	DESeq2	LRT	glmGamPoi	scranSumFactors
Hypk	3dpi	-1.32689		555.76	4.89712e-08	3.17411e-06	-5.45501	-4.65922	134.613	pseudobulk	DESeq2	LRT	glmGamPoi	scranSumFactors
Kxd1	3dpi	-1.13319		1303.69	5.10847e-08	3.29144e-06	-5.44749	-4.65174	133.624	pseudobulk	DESeq2	LRT	glmGamPoi	scranSumFactors
Rps15	3dpi	-1.22841		1124.86	5.10928e-08	3.29144e-06	-5.44746	-4.65174	133.62	pseudobulk	DESeq2	LRT	glmGamPoi	scranSumFactors
Myl6	3dpi	-1.24572		1510.73	5.13819e-08	3.29604e-06	-5.44646	-4.65145	133.489	pseudobulk	DESeq2	LRT	glmGamPoi	scranSumFactors
Lamp1	3dpi	-1.08681		1695.1	5.14762e-08	3.29604e-06	-5.44613	-4.65145	133.446	pseudobulk	DESeq2	LRT	glmGamPoi	scranSumFactors
Bloc1s1	3dpi	-1.89419		331.142	5.16874e-08	3.29956e-06	-5.44541	-4.65123	133.351	pseudobulk	DESeq2	LRT	glmGamPoi	scranSumFactors
ENSMUSG00000072940	3dpi	-1.34781		99.0398	5.24086e-08	3.32592e-06	-5.44294	-4.64959	133.028	pseudobulk	DESeq2	LRT	glmGamPoi	scranSumFactors
Srp9	3dpi	-0.904122		580.676	5.25646e-08	3.32592e-06	-5.44241	-4.64959	132.959	pseudobulk	DESeq2	LRT	glmGamPoi	scranSumFactors
Rps7-ps3	3dpi	-1.02791		296.632	5.25725e-08	3.32592e-06	-5.44238	-4.64959	132.956	pseudobulk	DESeq2	LRT	glmGamPoi	scranSumFactors
Timm10b	3dpi	-1.00151		486.097	5.30094e-08	3.33452e-06	-5.44091	-4.64906	132.764	pseudobulk	DESeq2	LRT	glmGamPoi	scranSumFactors
Fbxo2	3dpi	-1.25733		312.649	5.30241e-08	3.33452e-06	-5.44086	-4.64906	132.757	pseudobulk	DESeq2	LRT	glmGamPoi	scranSumFactors
Cacna1b	3dpi	0.636881		3421.63	5.36033e-08	3.36094e-06	5.43892	4.64743	132.505	pseudobulk	DESeq2	LRT	glmGamPoi	scranSumFactors
Fcrla	3dpi	-2.47386		50.8998	5.44942e-08	3.40669e-06	-5.43599	-4.64464	132.124	pseudobulk	DESeq2	LRT	glmGamPoi	scranSumFactors
Metrn	3dpi	-1.73766		71.9665	5.50203e-08	3.42944e-06	-5.43427	-4.64327	131.903	pseudobulk	DESeq2	LRT	glmGamPoi	scranSumFactors
Fkbp1a	3dpi	-0.85841		1340.44	5.56442e-08	3.45812e-06	-5.43226	-4.64155	131.643	pseudobulk	DESeq2	LRT	glmGamPoi	scranSumFactors
Cox7b	3dpi	-1.06451		1813.67	5.71559e-08	3.54165e-06	-5.42748	-4.63661	131.027	pseudobulk	DESeq2	LRT	glmGamPoi	scranSumFactors
Gng13	3dpi	-1.67654		188.938	5.79417e-08	3.57985e-06	-5.42504	-4.63439	130.715	pseudobulk	DESeq2	LRT	glmGamPoi	scranSumFactors
Ndrg2	3dpi	-1.35832		964.947	5.8808e-08	3.62278e-06	-5.42239	-4.63193	130.376	pseudobulk	DESeq2	LRT	glmGamPoi	scranSumFactors
Dpm3	3dpi	-1.58533		454.21	5.95228e-08	3.64525e-06	-5.42023	-4.63065	130.101	pseudobulk	DESeq2	LRT	glmGamPoi	scranSumFactors
Svbp	3dpi	-1.11227		146.669	5.95984e-08	3.64525e-06	-5.42	-4.63065	130.072	pseudobulk	DESeq2	LRT	glmGamPoi	scranSumFactors
Timm13	3dpi	-1.06568		557.82	5.97049e-08	3.64525e-06	-5.41968	-4.63065	130.031	pseudobulk	DESeq2	LRT	glmGamPoi	scranSumFactors
Plpp3	3dpi	-1.67843		2011.43	5.98628e-08	3.64525e-06	-5.41921	-4.63065	129.971	pseudobulk	DESeq2	LRT	glmGamPoi	scranSumFactors
Txn1	3dpi	-1.24735		521.359	6.0066e-08	3.64711e-06	-5.4186	-4.63054	129.894	pseudobulk	DESeq2	LRT	glmGamPoi	scranSumFactors
ENSMUSG00000079444	3dpi	-1.35915		390.088	6.04043e-08	3.64963e-06	-5.4176	-4.6304	129.766	pseudobulk	DESeq2	LRT	glmGamPoi	scranSumFactors
Cops6	3dpi	-1.43516		393.587	6.05931e-08	3.64963e-06	-5.41704	-4.6304	129.695	pseudobulk	DESeq2	LRT	glmGamPoi	scranSumFactors
Eif1	3dpi	-1.38873		2595.04	6.06256e-08	3.64963e-06	-5.41695	-4.6304	129.683	pseudobulk	DESeq2	LRT	glmGamPoi	scranSumFactors
Ndufs5	3dpi	-1.44022		678.138	6.08135e-08	3.65054e-06	-5.41639	-4.63035	129.613	pseudobulk	DESeq2	LRT	glmGamPoi	scranSumFactors
Pgam1	3dpi	-1.40643		1334.56	6.14701e-08	3.65132e-06	-5.41447	-4.6303	129.37	pseudobulk	DESeq2	LRT	glmGamPoi	scranSumFactors
Eva1b	3dpi	-2.36735		31.3637	6.16294e-08	3.65132e-06	-5.41401	-4.6303	129.311	pseudobulk	DESeq2	LRT	glmGamPoi	scranSumFactors
Borcs6	3dpi	-1.23964		116.677	6.17006e-08	3.65132e-06	-5.4138	-4.6303	129.285	pseudobulk	DESeq2	LRT	glmGamPoi	scranSumFactors
S1pr1	3dpi	-2.38665		267.217	6.17206e-08	3.65132e-06	-5.41374	-4.6303	129.278	pseudobulk	DESeq2	LRT	glmGamPoi	scranSumFactors
Mrpl12	3dpi	-1.2859		334.08	6.18493e-08	3.65132e-06	-5.41337	-4.6303	129.23	pseudobulk	DESeq2	LRT	glmGamPoi	scranSumFactors
Rps18	3dpi	-1.08728		911.969	6.18634e-08	3.65132e-06	-5.41333	-4.6303	129.225	pseudobulk	DESeq2	LRT	glmGamPoi	scranSumFactors
Adar	3dpi	0.490653		1530.41	6.21858e-08	3.66013e-06	5.4124	4.6298	129.108	pseudobulk	DESeq2	LRT	glmGamPoi	scranSumFactors
Rpl7a	3dpi	-1.77225		435.141	6.24405e-08	3.66491e-06	-5.41167	-4.62953	129.015	pseudobulk	DESeq2	LRT	glmGamPoi	scranSumFactors
Upp2	3dpi	0.535322		5663.78	6.2843e-08	3.67832e-06	5.41052	4.62878	128.87	pseudobulk	DESeq2	LRT	glmGamPoi	scranSumFactors
H2az1	3dpi	-1.13055		1476.08	6.33566e-08	3.69814e-06	-5.40906	-4.62766	128.687	pseudobulk	DESeq2	LRT	glmGamPoi	scranSumFactors
Mrps36	3dpi	-1.14992		374.741	6.35981e-08	3.70201e-06	-5.40838	-4.62745	128.601	pseudobulk	DESeq2	LRT	glmGamPoi	scranSumFactors
ENSMUSG00000080921	3dpi	-1.25083		203.567	6.47531e-08	3.75888e-06	-5.40515	-4.62429	128.196	pseudobulk	DESeq2	LRT	glmGamPoi	scranSumFactors
Ndufb5	3dpi	-1.29046		1270.57	6.50628e-08	3.76651e-06	-5.4043	-4.62387	128.089	pseudobulk	DESeq2	LRT	glmGamPoi	scranSumFactors
Psmb1	3dpi	-1.0079		1142.96	6.60236e-08	3.81169e-06	-5.40167	-4.62139	127.76	pseudobulk	DESeq2	LRT	glmGamPoi	scranSumFactors
Ntsr2	3dpi	-1.98642		832.874	6.69184e-08	3.85282e-06	-5.39925	-4.61917	127.459	pseudobulk	DESeq2	LRT	glmGamPoi	scranSumFactors
Micos13	3dpi	-1.33039		629.829	6.71836e-08	3.85758e-06	-5.39854	-4.61891	127.371	pseudobulk	DESeq2	LRT	glmGamPoi	scranSumFactors
Nr1d1	3dpi	-0.976996		189.099	6.74635e-08	3.86315e-06	-5.3978	-4.61861	127.278	pseudobulk	DESeq2	LRT	glmGamPoi	scranSumFactors
Myl12b	3dpi	-1.33684		1025.64	6.79573e-08	3.88091e-06	-5.39649	-4.61766	127.116	pseudobulk	DESeq2	LRT	glmGamPoi	scranSumFactors
Npc2	3dpi	-1.12349		432.437	6.83649e-08	3.88257e-06	-5.39542	-4.61757	126.982	pseudobulk	DESeq2	LRT	glmGamPoi	scranSumFactors
Sem1	3dpi	-1.06838		909.846	6.84671e-08	3.88257e-06	-5.39515	-4.61757	126.949	pseudobulk	DESeq2	LRT	glmGamPoi	scranSumFactors
Myt1l	3dpi	0.512047		6419.94	6.85376e-08	3.88257e-06	5.39496	4.61757	126.926	pseudobulk	DESeq2	LRT	glmGamPoi	scranSumFactors
Mpv17l2	3dpi	-1.37868		87.7721	6.89013e-08	3.89274e-06	-5.39401	-4.61703	126.809	pseudobulk	DESeq2	LRT	glmGamPoi	scranSumFactors
Plekha6	3dpi	0.605351		1752.39	6.98468e-08	3.93127e-06	5.39156	4.61498	126.506	pseudobulk	DESeq2	LRT	glmGamPoi	scranSumFactors
Cdkn1b	3dpi	-0.955485		197.823	6.99554e-08	3.93127e-06	-5.39129	-4.61498	126.471	pseudobulk	DESeq2	LRT	glmGamPoi	scranSumFactors
Atp5j	3dpi	-1.73265		1687.27	7.17091e-08	4.01514e-06	-5.38684	-4.6106	125.923	pseudobulk	DESeq2	LRT	glmGamPoi	scranSumFactors
Polr2k	3dpi	-1.10898		363.824	7.21125e-08	4.01514e-06	-5.38583	-4.6106	125.799	pseudobulk	DESeq2	LRT	glmGamPoi	scranSumFactors
Rpl10a	3dpi	-1.22198		838.49	7.23591e-08	4.01514e-06	-5.38521	-4.6106	125.724	pseudobulk	DESeq2	LRT	glmGamPoi	scranSumFactors
N4bp2l1	3dpi	0.559752		1114.99	7.23862e-08	4.01514e-06	5.38515	4.6106	125.716	pseudobulk	DESeq2	LRT	glmGamPoi	scranSumFactors
Hmgn2	3dpi	-0.998505		478.167	7.23979e-08	4.01514e-06	-5.38512	-4.6106	125.712	pseudobulk	DESeq2	LRT	glmGamPoi	scranSumFactors
Mapk10	3dpi	0.542685		6391.36	7.30492e-08	4.03092e-06	5.3835	4.60978	125.515	pseudobulk	DESeq2	LRT	glmGamPoi	scranSumFactors
Park7	3dpi	-1.17799		878.633	7.3064e-08	4.03092e-06	-5.38347	-4.60978	125.51	pseudobulk	DESeq2	LRT	glmGamPoi	scranSumFactors
Rpl37rt	3dpi	-1.18102		329.145	7.35891e-08	4.04713e-06	-5.38218	-4.60895	125.353	pseudobulk	DESeq2	LRT	glmGamPoi	scranSumFactors
Rps4x	3dpi	-1.48504		1071.41	7.37409e-08	4.04713e-06	-5.38181	-4.60895	125.307	pseudobulk	DESeq2	LRT	glmGamPoi	scranSumFactors
Arhgdia	3dpi	-1.02092		436.135	7.39534e-08	4.04828e-06	-5.38129	-4.60889	125.244	pseudobulk	DESeq2	LRT	glmGamPoi	scranSumFactors
Eif3k	3dpi	-1.39673		601.755	7.55687e-08	4.12601e-06	-5.3774	-4.60493	124.77	pseudobulk	DESeq2	LRT	glmGamPoi	scranSumFactors
Ap2m1	3dpi	-1.12098		485.922	7.65616e-08	4.16945e-06	-5.37505	-4.60275	124.484	pseudobulk	DESeq2	LRT	glmGamPoi	scranSumFactors
Hnrnpa0	3dpi	-1.05575		564.882	7.68972e-08	4.17363e-06	-5.37426	-4.60254	124.389	pseudobulk	DESeq2	LRT	glmGamPoi	scranSumFactors
1810037I17Rik	3dpi	-1.30135		565.449	7.70334e-08	4.17363e-06	-5.37394	-4.60254	124.35	pseudobulk	DESeq2	LRT	glmGamPoi	scranSumFactors
Atp5g3	3dpi	-1.65772		1539.74	7.76535e-08	4.19646e-06	-5.3725	-4.60141	124.175	pseudobulk	DESeq2	LRT	glmGamPoi	scranSumFactors
Gm2000	3dpi	-1.30945		256.392	7.80438e-08	4.1995e-06	-5.37159	-4.60126	124.066	pseudobulk	DESeq2	LRT	glmGamPoi	scranSumFactors
Chmp5	3dpi	-0.977307		485.953	7.81072e-08	4.1995e-06	-5.37145	-4.60126	124.048	pseudobulk	DESeq2	LRT	glmGamPoi	scranSumFactors
Tpi1	3dpi	-1.4269		1214.68	7.91819e-08	4.24648e-06	-5.36898	-4.59894	123.75	pseudobulk	DESeq2	LRT	glmGamPoi	scranSumFactors
BC031181	3dpi	-0.964088		1007.52	8.00356e-08	4.2814e-06	-5.36705	-4.59723	123.517	pseudobulk	DESeq2	LRT	glmGamPoi	scranSumFactors
Pebp1	3dpi	-1.2242		1905.79	8.06061e-08	4.30103e-06	-5.36577	-4.59628	123.363	pseudobulk	DESeq2	LRT	glmGamPoi	scranSumFactors
ENSMUSG00000116358	3dpi	-1.384		2194.66	8.16198e-08	4.34045e-06	-5.36351	-4.59438	123.093	pseudobulk	DESeq2	LRT	glmGamPoi	scranSumFactors
Sergef	3dpi	0.728665		1468.62	8.17558e-08	4.34045e-06	5.36321	4.59438	123.057	pseudobulk	DESeq2	LRT	glmGamPoi	scranSumFactors
Sall2	3dpi	-1.05946		253.663	8.20424e-08	4.34475e-06	-5.36258	-4.59417	122.981	pseudobulk	DESeq2	LRT	glmGamPoi	scranSumFactors
Slc25a5	3dpi	-1.61192		628.862	8.23799e-08	4.34781e-06	-5.36184	-4.59402	122.892	pseudobulk	DESeq2	LRT	glmGamPoi	scranSumFactors
Erh	3dpi	-0.814953		679.627	8.25117e-08	4.34781e-06	-5.36155	-4.59402	122.858	pseudobulk	DESeq2	LRT	glmGamPoi	scranSumFactors
Nkain4	3dpi	-1.76697		530.681	8.31217e-08	4.36906e-06	-5.36022	-4.59301	122.699	pseudobulk	DESeq2	LRT	glmGamPoi	scranSumFactors
Mpc2	3dpi	-0.894144		1039.75	8.36564e-08	4.38625e-06	-5.35906	-4.59219	122.56	pseudobulk	DESeq2	LRT	glmGamPoi	scranSumFactors
Atp5c1	3dpi	-0.761203		1552.66	8.3889e-08	4.38756e-06	-5.35856	-4.59212	122.501	pseudobulk	DESeq2	LRT	glmGamPoi	scranSumFactors
Pgp	3dpi	-1.1038		726.552	8.43649e-08	4.40156e-06	-5.35754	-4.59146	122.379	pseudobulk	DESeq2	LRT	glmGamPoi	scranSumFactors
Atp5h	3dpi	-1.59014		1677.93	8.52282e-08	4.43564e-06	-5.35569	-4.58985	122.16	pseudobulk	DESeq2	LRT	glmGamPoi	scranSumFactors
Pfdn1	3dpi	-0.721982		1090.99	8.58817e-08	4.45724e-06	-5.35431	-4.58884	121.996	pseudobulk	DESeq2	LRT	glmGamPoi	scranSumFactors
Sparc	3dpi	-1.88179		846.261	8.60651e-08	4.45724e-06	-5.35393	-4.58884	121.95	pseudobulk	DESeq2	LRT	glmGamPoi	scranSumFactors
Atpif1	3dpi	-1.11595		2477.26	8.70793e-08	4.49348e-06	-5.35181	-4.58715	121.699	pseudobulk	DESeq2	LRT	glmGamPoi	scranSumFactors
Uqcrb	3dpi	-1.68736		1117.68	8.71902e-08	4.49348e-06	-5.35158	-4.58715	121.672	pseudobulk	DESeq2	LRT	glmGamPoi	scranSumFactors
ENSMUSG00000064337	3dpi	-1.26792		402.634	8.77114e-08	4.50935e-06	-5.3505	-4.58641	121.544	pseudobulk	DESeq2	LRT	glmGamPoi	scranSumFactors
Ppp1r3c	3dpi	-1.74106		53.9381	8.86146e-08	4.53848e-06	-5.34865	-4.58506	121.325	pseudobulk	DESeq2	LRT	glmGamPoi	scranSumFactors
H2az2	3dpi	-0.859162		387.12	8.87076e-08	4.53848e-06	-5.34846	-4.58506	121.303	pseudobulk	DESeq2	LRT	glmGamPoi	scranSumFactors
Rps19	3dpi	-1.26441		950.353	8.91394e-08	4.54083e-06	-5.34758	-4.58496	121.199	pseudobulk	DESeq2	LRT	glmGamPoi	scranSumFactors
Ppdpf	3dpi	-1.5009		266.341	8.91833e-08	4.54083e-06	-5.34749	-4.58496	121.189	pseudobulk	DESeq2	LRT	glmGamPoi	scranSumFactors
Ran	3dpi	-1.57533		732.193	8.94799e-08	4.54498e-06	-5.34689	-4.58476	121.118	pseudobulk	DESeq2	LRT	glmGamPoi	scranSumFactors
Vkorc1	3dpi	-1.5742		162.768	9.13756e-08	4.63013e-06	-5.34309	-4.58088	120.672	pseudobulk	DESeq2	LRT	glmGamPoi	scranSumFactors
Ttbk1	3dpi	0.61995		589.077	9.23862e-08	4.67014e-06	5.3411	4.57909	120.438	pseudobulk	DESeq2	LRT	glmGamPoi	scranSumFactors
ENSMUSG00000067870	3dpi	-1.57448		116.306	9.30068e-08	4.69029e-06	-5.33988	-4.57818	120.296	pseudobulk	DESeq2	LRT	glmGamPoi	scranSumFactors
Ndufs3	3dpi	-0.77499		1098.23	9.42879e-08	4.73972e-06	-5.3374	-4.57599	120.007	pseudobulk	DESeq2	LRT	glmGamPoi	scranSumFactors
Selenow	3dpi	-0.918784		1672.86	9.44356e-08	4.73972e-06	-5.33712	-4.57599	119.974	pseudobulk	DESeq2	LRT	glmGamPoi	scranSumFactors
Pcna	3dpi	-1.25889		155.132	9.46735e-08	4.74041e-06	-5.33666	-4.57596	119.92	pseudobulk	DESeq2	LRT	glmGamPoi	scranSumFactors
B2m	3dpi	-1.87754		151.218	9.55181e-08	4.77139e-06	-5.33505	-4.5746	119.733	pseudobulk	DESeq2	LRT	glmGamPoi	scranSumFactors
Kcnq1ot1	3dpi	0.657105		6236.94	9.6353e-08	4.80174e-06	5.33347	4.57327	119.549	pseudobulk	DESeq2	LRT	glmGamPoi	scranSumFactors
Chchd2	3dpi	-1.76642		2589.42	9.84952e-08	4.88684e-06	-5.32948	-4.56959	119.087	pseudobulk	DESeq2	LRT	glmGamPoi	scranSumFactors
Sat1	3dpi	-1.13662		441.721	9.85231e-08	4.88684e-06	-5.32943	-4.56959	119.081	pseudobulk	DESeq2	LRT	glmGamPoi	scranSumFactors
ENSMUSG00000101249	3dpi	-1.28505		317.158	1.00281e-07	4.96239e-06	-5.32621	-4.56637	118.71	pseudobulk	DESeq2	LRT	glmGamPoi	scranSumFactors
Msmo1	3dpi	-1.01948		1045.19	1.00612e-07	4.96572e-06	-5.32561	-4.56623	118.641	pseudobulk	DESeq2	LRT	glmGamPoi	scranSumFactors
Gabarapl2	3dpi	-1.08816		1803.44	1.00819e-07	4.96572e-06	-5.32524	-4.56623	118.598	pseudobulk	DESeq2	LRT	glmGamPoi	scranSumFactors
Rps5	3dpi	-1.4212		1227.04	1.01451e-07	4.98525e-06	-5.32411	-4.56541	118.468	pseudobulk	DESeq2	LRT	glmGamPoi	scranSumFactors
Rps14	3dpi	-1.10148		1217.32	1.02051e-07	5.0031e-06	-5.32303	-4.56466	118.345	pseudobulk	DESeq2	LRT	glmGamPoi	scranSumFactors
Psmc3	3dpi	-0.878022		503.853	1.02529e-07	5.01491e-06	-5.32218	-4.56416	118.247	pseudobulk	DESeq2	LRT	glmGamPoi	scranSumFactors
Tyrobp	3dpi	-2.1854		32.7697	1.03937e-07	5.07205e-06	-5.3197	-4.56179	117.963	pseudobulk	DESeq2	LRT	glmGamPoi	scranSumFactors
Ier5l	3dpi	-1.13417		139.003	1.04488e-07	5.08718e-06	-5.31874	-4.56116	117.853	pseudobulk	DESeq2	LRT	glmGamPoi	scranSumFactors
Polr2f	3dpi	-1.40597		394.236	1.05057e-07	5.1031e-06	-5.31775	-4.5605	117.74	pseudobulk	DESeq2	LRT	glmGamPoi	scranSumFactors
Rnd2	3dpi	-1.28389		220.237	1.06407e-07	5.14937e-06	-5.31543	-4.55861	117.475	pseudobulk	DESeq2	LRT	glmGamPoi	scranSumFactors
Rps12	3dpi	-1.18039		208.23	1.06497e-07	5.14937e-06	-5.31527	-4.55861	117.457	pseudobulk	DESeq2	LRT	glmGamPoi	scranSumFactors
Ap2s1	3dpi	-1.13371		548.521	1.07225e-07	5.15311e-06	-5.31403	-4.55846	117.316	pseudobulk	DESeq2	LRT	glmGamPoi	scranSumFactors
Mien1	3dpi	-1.35136		324.752	1.07254e-07	5.15311e-06	-5.31398	-4.55846	117.311	pseudobulk	DESeq2	LRT	glmGamPoi	scranSumFactors
Acot13	3dpi	-0.839727		478.132	1.07306e-07	5.15311e-06	-5.3139	-4.55846	117.301	pseudobulk	DESeq2	LRT	glmGamPoi	scranSumFactors
Rpp25l	3dpi	-1.43285		142.757	1.08323e-07	5.16549e-06	-5.31218	-4.55795	117.106	pseudobulk	DESeq2	LRT	glmGamPoi	scranSumFactors
Ndufa8	3dpi	-1.28561		719.658	1.08339e-07	5.16549e-06	-5.31215	-4.55795	117.102	pseudobulk	DESeq2	LRT	glmGamPoi	scranSumFactors
Rpl14	3dpi	-1.2477		1031.87	1.08494e-07	5.16549e-06	-5.31189	-4.55795	117.073	pseudobulk	DESeq2	LRT	glmGamPoi	scranSumFactors
Lsm4	3dpi	-1.15407		286.076	1.08541e-07	5.16549e-06	-5.31181	-4.55795	117.064	pseudobulk	DESeq2	LRT	glmGamPoi	scranSumFactors
Mical3	3dpi	0.487457		3216.85	1.08837e-07	5.1679e-06	5.31132	4.55785	117.008	pseudobulk	DESeq2	LRT	glmGamPoi	scranSumFactors
Slc25a18	3dpi	-1.45531		246.805	1.09626e-07	5.18323e-06	-5.31	-4.55723	116.858	pseudobulk	DESeq2	LRT	glmGamPoi	scranSumFactors
Gstp1	3dpi	-1.39856		1269.4	1.0965e-07	5.18323e-06	-5.30996	-4.55723	116.854	pseudobulk	DESeq2	LRT	glmGamPoi	scranSumFactors
Mat2b	3dpi	-0.90827		308.371	1.1048e-07	5.2108e-06	-5.30858	-4.55612	116.698	pseudobulk	DESeq2	LRT	glmGamPoi	scranSumFactors
Tnfrsf1a	3dpi	-2.39574		42.4176	1.11034e-07	5.22526e-06	-5.30767	-4.55553	116.595	pseudobulk	DESeq2	LRT	glmGamPoi	scranSumFactors
Rhoa	3dpi	-0.722066		983.648	1.11759e-07	5.24771e-06	-5.30649	-4.55463	116.461	pseudobulk	DESeq2	LRT	glmGamPoi	scranSumFactors
Mrpl20	3dpi	-1.29719		546.671	1.12372e-07	5.26478e-06	-5.30549	-4.55395	116.349	pseudobulk	DESeq2	LRT	glmGamPoi	scranSumFactors
Entpd2	3dpi	-2.14981		60.1275	1.12949e-07	5.28012e-06	-5.30455	-4.55334	116.244	pseudobulk	DESeq2	LRT	glmGamPoi	scranSumFactors
Ifitm3	3dpi	-2.93789		61.5359	1.14999e-07	5.35269e-06	-5.30127	-4.55047	115.875	pseudobulk	DESeq2	LRT	glmGamPoi	scranSumFactors
Ldhb	3dpi	-1.08471		1612.39	1.15306e-07	5.35269e-06	-5.30079	-4.55047	115.82	pseudobulk	DESeq2	LRT	glmGamPoi	scranSumFactors
Jund	3dpi	-1.40839		1053.05	1.15423e-07	5.35269e-06	-5.3006	-4.55047	115.8	pseudobulk	DESeq2	LRT	glmGamPoi	scranSumFactors
Cisd1	3dpi	-1.40014		938.139	1.15515e-07	5.35269e-06	-5.30045	-4.55047	115.783	pseudobulk	DESeq2	LRT	glmGamPoi	scranSumFactors
Taf10	3dpi	-1.37277		276.932	1.16403e-07	5.38204e-06	-5.29906	-4.54932	115.627	pseudobulk	DESeq2	LRT	glmGamPoi	scranSumFactors
Heph	3dpi	-1.1161		166.021	1.16766e-07	5.38702e-06	-5.29849	-4.54912	115.563	pseudobulk	DESeq2	LRT	glmGamPoi	scranSumFactors
Rnf7	3dpi	-1.20885		610.299	1.17103e-07	5.39083e-06	-5.29796	-4.54897	115.504	pseudobulk	DESeq2	LRT	glmGamPoi	scranSumFactors
Rnaset2a	3dpi	-1.42653		158.688	1.18751e-07	5.44976e-06	-5.29541	-4.54668	115.219	pseudobulk	DESeq2	LRT	glmGamPoi	scranSumFactors
Serpinh1	3dpi	-2.0298		48.5786	1.18899e-07	5.44976e-06	-5.29518	-4.54668	115.194	pseudobulk	DESeq2	LRT	glmGamPoi	scranSumFactors
Polr2j	3dpi	-1.07185		340.291	1.19267e-07	5.4548e-06	-5.29462	-4.54649	115.131	pseudobulk	DESeq2	LRT	glmGamPoi	scranSumFactors
Itm2b	3dpi	-1.26717		4868.54	1.20045e-07	5.4785e-06	-5.29343	-4.54558	114.999	pseudobulk	DESeq2	LRT	glmGamPoi	scranSumFactors
Pdcd10	3dpi	-0.538733		879.223	1.21113e-07	5.50269e-06	-5.29181	-4.54465	114.819	pseudobulk	DESeq2	LRT	glmGamPoi	scranSumFactors
Ctss	3dpi	-1.94398		73.901	1.21352e-07	5.50269e-06	-5.29145	-4.54465	114.778	pseudobulk	DESeq2	LRT	glmGamPoi	scranSumFactors
Gapdh	3dpi	-1.71159		1571.83	1.21356e-07	5.50269e-06	-5.29144	-4.54465	114.778	pseudobulk	DESeq2	LRT	glmGamPoi	scranSumFactors
Enho	3dpi	-1.51159		412.725	1.22039e-07	5.52123e-06	-5.29042	-4.54394	114.664	pseudobulk	DESeq2	LRT	glmGamPoi	scranSumFactors
Fis1	3dpi	-0.972281		796.494	1.22288e-07	5.52123e-06	-5.29004	-4.54394	114.623	pseudobulk	DESeq2	LRT	glmGamPoi	scranSumFactors
Ndufs7	3dpi	-1.41072		974.006	1.22957e-07	5.52581e-06	-5.28904	-4.54377	114.512	pseudobulk	DESeq2	LRT	glmGamPoi	scranSumFactors
Dock8	3dpi	-1.27905		169.076	1.23143e-07	5.52581e-06	-5.28877	-4.54377	114.481	pseudobulk	DESeq2	LRT	glmGamPoi	scranSumFactors
Vdac1	3dpi	-0.780284		1552.41	1.23209e-07	5.52581e-06	-5.28867	-4.54377	114.471	pseudobulk	DESeq2	LRT	glmGamPoi	scranSumFactors
Degs1	3dpi	-1.14289		482.93	1.23435e-07	5.52581e-06	-5.28833	-4.54377	114.433	pseudobulk	DESeq2	LRT	glmGamPoi	scranSumFactors
Snrpd2	3dpi	-1.48643		509.269	1.24093e-07	5.53467e-06	-5.28736	-4.54343	114.326	pseudobulk	DESeq2	LRT	glmGamPoi	scranSumFactors
Dctn3	3dpi	-1.29674		599.52	1.24157e-07	5.53467e-06	-5.28727	-4.54343	114.315	pseudobulk	DESeq2	LRT	glmGamPoi	scranSumFactors
Rpl10	3dpi	-1.79374		349.362	1.27258e-07	5.66096e-06	-5.28275	-4.53867	113.818	pseudobulk	DESeq2	LRT	glmGamPoi	scranSumFactors
Cavin3	3dpi	-1.70323		138.544	1.27656e-07	5.66674e-06	-5.28218	-4.53846	113.755	pseudobulk	DESeq2	LRT	glmGamPoi	scranSumFactors
Cmtm5	3dpi	-1.59451		545.701	1.29134e-07	5.72033e-06	-5.28007	-4.53647	113.523	pseudobulk	DESeq2	LRT	glmGamPoi	scranSumFactors
Mrpl11	3dpi	-1.19952		318.929	1.29735e-07	5.73251e-06	-5.27922	-4.53602	113.43	pseudobulk	DESeq2	LRT	glmGamPoi	scranSumFactors
Gjb6	3dpi	-2.00296		308.493	1.29994e-07	5.73251e-06	-5.27885	-4.53602	113.39	pseudobulk	DESeq2	LRT	glmGamPoi	scranSumFactors
1810058I24Rik	3dpi	-1.07142		185.238	1.30223e-07	5.73251e-06	-5.27853	-4.53602	113.354	pseudobulk	DESeq2	LRT	glmGamPoi	scranSumFactors
Fzd9	3dpi	-1.78076		47.3723	1.30835e-07	5.7475e-06	-5.27767	-4.53547	113.26	pseudobulk	DESeq2	LRT	glmGamPoi	scranSumFactors
Rtl8a	3dpi	-1.83814		1363.21	1.31505e-07	5.76494e-06	-5.27674	-4.53483	113.158	pseudobulk	DESeq2	LRT	glmGamPoi	scranSumFactors
Sdc4	3dpi	-1.85296		217.568	1.3224e-07	5.78518e-06	-5.27571	-4.53409	113.046	pseudobulk	DESeq2	LRT	glmGamPoi	scranSumFactors
Snu13	3dpi	-1.50829		775.195	1.32637e-07	5.79056e-06	-5.27516	-4.5339	112.986	pseudobulk	DESeq2	LRT	glmGamPoi	scranSumFactors
ENSMUSG00000102657	3dpi	0.544453		1170.01	1.34912e-07	5.87773e-06	5.27204	4.53074	112.646	pseudobulk	DESeq2	LRT	glmGamPoi	scranSumFactors
0610012G03Rik	3dpi	-1.05028		435.786	1.35822e-07	5.88441e-06	-5.27081	-4.5305	112.512	pseudobulk	DESeq2	LRT	glmGamPoi	scranSumFactors
Tm2d2	3dpi	-1.28988		580.435	1.36018e-07	5.88441e-06	-5.27055	-4.5305	112.483	pseudobulk	DESeq2	LRT	glmGamPoi	scranSumFactors
Mrpl57	3dpi	-1.21183		357.258	1.3614e-07	5.88441e-06	-5.27038	-4.5305	112.466	pseudobulk	DESeq2	LRT	glmGamPoi	scranSumFactors
Shank2	3dpi	0.738364		1898.2	1.3618e-07	5.88441e-06	5.27033	4.5305	112.46	pseudobulk	DESeq2	LRT	glmGamPoi	scranSumFactors
Tril	3dpi	-1.78381		233.738	1.3736e-07	5.9233e-06	-5.26874	-4.52911	112.288	pseudobulk	DESeq2	LRT	glmGamPoi	scranSumFactors
Ctsl	3dpi	-1.17611		1072.02	1.38155e-07	5.93409e-06	-5.26768	-4.52872	112.173	pseudobulk	DESeq2	LRT	glmGamPoi	scranSumFactors
Pttg1	3dpi	-1.32345		331.376	1.38172e-07	5.93409e-06	-5.26766	-4.52872	112.171	pseudobulk	DESeq2	LRT	glmGamPoi	scranSumFactors
Efhd2	3dpi	-0.74161		353.026	1.39034e-07	5.94877e-06	-5.26652	-4.5282	112.047	pseudobulk	DESeq2	LRT	glmGamPoi	scranSumFactors
Ndufa13	3dpi	-1.43651		1638.17	1.39257e-07	5.94877e-06	-5.26623	-4.5282	112.015	pseudobulk	DESeq2	LRT	glmGamPoi	scranSumFactors
Alkbh7	3dpi	-1.09097		166.298	1.3955e-07	5.94877e-06	-5.26584	-4.5282	111.974	pseudobulk	DESeq2	LRT	glmGamPoi	scranSumFactors
Rtl8b	3dpi	-1.46196		539.22	1.3964e-07	5.94877e-06	-5.26572	-4.5282	111.961	pseudobulk	DESeq2	LRT	glmGamPoi	scranSumFactors
Fez1	3dpi	-0.578184		1444.37	1.40572e-07	5.97123e-06	-5.2645	-4.52741	111.829	pseudobulk	DESeq2	LRT	glmGamPoi	scranSumFactors
Spock1	3dpi	0.623176		4673.89	1.40732e-07	5.97123e-06	5.26429	4.52741	111.806	pseudobulk	DESeq2	LRT	glmGamPoi	scranSumFactors
Cebpb	3dpi	-1.04912		138.883	1.44099e-07	6.10184e-06	-5.25994	-4.52283	111.338	pseudobulk	DESeq2	LRT	glmGamPoi	scranSumFactors
Shisa5	3dpi	-1.1876		193.517	1.4516e-07	6.13445e-06	-5.2586	-4.5217	111.194	pseudobulk	DESeq2	LRT	glmGamPoi	scranSumFactors
Prxl2a	3dpi	-1.05036		697.516	1.46757e-07	6.18956e-06	-5.25658	-4.51981	110.978	pseudobulk	DESeq2	LRT	glmGamPoi	scranSumFactors
Slc25a3	3dpi	-1.01514		1907.37	1.47226e-07	6.19697e-06	-5.256	-4.51956	110.915	pseudobulk	DESeq2	LRT	glmGamPoi	scranSumFactors
Mrpl17	3dpi	-1.38897		334.917	1.47837e-07	6.21031e-06	-5.25523	-4.5191	110.834	pseudobulk	DESeq2	LRT	glmGamPoi	scranSumFactors
Tceal8	3dpi	-1.32845		151.019	1.49166e-07	6.25372e-06	-5.25359	-4.51762	110.658	pseudobulk	DESeq2	LRT	glmGamPoi	scranSumFactors
AI413582	3dpi	-1.40778		204.667	1.49696e-07	6.26353e-06	-5.25293	-4.51729	110.588	pseudobulk	DESeq2	LRT	glmGamPoi	scranSumFactors
Arpc4	3dpi	-1.01061		359.913	1.5169e-07	6.33279e-06	-5.2505	-4.51496	110.329	pseudobulk	DESeq2	LRT	glmGamPoi	scranSumFactors
Rps3	3dpi	-1.35826		1181.79	1.51951e-07	6.33279e-06	-5.25018	-4.51496	110.295	pseudobulk	DESeq2	LRT	glmGamPoi	scranSumFactors
Txnl4a.1	3dpi	-0.782803		634.729	1.52453e-07	6.34121e-06	-5.24957	-4.51468	110.231	pseudobulk	DESeq2	LRT	glmGamPoi	scranSumFactors
Prdx6	3dpi	-1.0274		701.887	1.52879e-07	6.34538e-06	-5.24906	-4.51454	110.176	pseudobulk	DESeq2	LRT	glmGamPoi	scranSumFactors
Anxa5	3dpi	-1.07168		223.641	1.53264e-07	6.34538e-06	-5.24859	-4.51454	110.127	pseudobulk	DESeq2	LRT	glmGamPoi	scranSumFactors
Smim26	3dpi	-1.41156		449.311	1.53646e-07	6.34538e-06	-5.24814	-4.51454	110.078	pseudobulk	DESeq2	LRT	glmGamPoi	scranSumFactors
A2ml1	3dpi	-2.04659		104.254	1.53755e-07	6.34538e-06	-5.24801	-4.51454	110.064	pseudobulk	DESeq2	LRT	glmGamPoi	scranSumFactors
ENSMUSG00000114303	3dpi	-1.4753		113.829	1.55888e-07	6.42087e-06	-5.24547	-4.51203	109.795	pseudobulk	DESeq2	LRT	glmGamPoi	scranSumFactors
Ctnna1	3dpi	-0.64645		586.64	1.56332e-07	6.42664e-06	-5.24494	-4.51184	109.74	pseudobulk	DESeq2	LRT	glmGamPoi	scranSumFactors
Nop10	3dpi	-1.46553		663.251	1.57893e-07	6.47555e-06	-5.24311	-4.51024	109.546	pseudobulk	DESeq2	LRT	glmGamPoi	scranSumFactors
Atp5pb	3dpi	-1.10322		1631.21	1.58135e-07	6.47555e-06	-5.24283	-4.51024	109.517	pseudobulk	DESeq2	LRT	glmGamPoi	scranSumFactors
Mir703	3dpi	-2.44847		89.4665	1.59123e-07	6.49285e-06	-5.24168	-4.50967	109.396	pseudobulk	DESeq2	LRT	glmGamPoi	scranSumFactors
Hint1	3dpi	-1.39892		1904.7	1.59225e-07	6.49285e-06	-5.24156	-4.50967	109.383	pseudobulk	DESeq2	LRT	glmGamPoi	scranSumFactors
ENSMUSG00000101233	3dpi	-1.24961		91.5915	1.59479e-07	6.49285e-06	-5.24127	-4.50967	109.352	pseudobulk	DESeq2	LRT	glmGamPoi	scranSumFactors
Grpel1	3dpi	-1.35849		291.275	1.60948e-07	6.54008e-06	-5.23957	-4.50813	109.174	pseudobulk	DESeq2	LRT	glmGamPoi	scranSumFactors
Sec11c	3dpi	-1.13334		1253.03	1.61964e-07	6.5687e-06	-5.23841	-4.50721	109.052	pseudobulk	DESeq2	LRT	glmGamPoi	scranSumFactors
D630045J12Rik	3dpi	0.653219		1142.51	1.62439e-07	6.57535e-06	5.23787	4.50699	108.995	pseudobulk	DESeq2	LRT	glmGamPoi	scranSumFactors
Rps13-ps2	3dpi	-1.14399		199.691	1.64025e-07	6.61869e-06	-5.23608	-4.5056	108.807	pseudobulk	DESeq2	LRT	glmGamPoi	scranSumFactors
ENSMUSG00000097451	3dpi	0.496495		11998.7	1.64136e-07	6.61869e-06	5.23595	4.5056	108.794	pseudobulk	DESeq2	LRT	glmGamPoi	scranSumFactors
Cggbp1	3dpi	-1.07483		281.31	1.64852e-07	6.63491e-06	-5.23515	-4.50508	108.71	pseudobulk	DESeq2	LRT	glmGamPoi	scranSumFactors
Ywhaq	3dpi	-0.835686		1926.68	1.65527e-07	6.64939e-06	-5.23439	-4.50461	108.631	pseudobulk	DESeq2	LRT	glmGamPoi	scranSumFactors
Wnk2	3dpi	0.572737		2241.68	1.65861e-07	6.65018e-06	5.23402	4.50459	108.592	pseudobulk	DESeq2	LRT	glmGamPoi	scranSumFactors
Mroh5	3dpi	-1.01286		146.487	1.66241e-07	6.6524e-06	-5.2336	-4.50452	108.548	pseudobulk	DESeq2	LRT	glmGamPoi	scranSumFactors
Grid1	3dpi	0.612379		7453.91	1.66747e-07	6.6524e-06	5.23304	4.50452	108.489	pseudobulk	DESeq2	LRT	glmGamPoi	scranSumFactors
H2-T23	3dpi	-1.31876		102.781	1.66861e-07	6.6524e-06	-5.23291	-4.50452	108.476	pseudobulk	DESeq2	LRT	glmGamPoi	scranSumFactors
Selenom	3dpi	-1.17198		1529.59	1.67232e-07	6.65463e-06	-5.2325	-4.50445	108.433	pseudobulk	DESeq2	LRT	glmGamPoi	scranSumFactors
Mrfap1	3dpi	-1.28888		1202.58	1.67654e-07	6.65732e-06	-5.23203	-4.50436	108.385	pseudobulk	DESeq2	LRT	glmGamPoi	scranSumFactors
0610009B22Rik	3dpi	-1.14367		283.218	1.6793e-07	6.65732e-06	-5.23173	-4.50436	108.353	pseudobulk	DESeq2	LRT	glmGamPoi	scranSumFactors
Pmm1	3dpi	-1.01656		482.624	1.69694e-07	6.71468e-06	-5.2298	-4.50254	108.152	pseudobulk	DESeq2	LRT	glmGamPoi	scranSumFactors
Psmb4	3dpi	-1.29067		680.065	1.7011e-07	6.71853e-06	-5.22935	-4.50242	108.105	pseudobulk	DESeq2	LRT	glmGamPoi	scranSumFactors
Commd3	3dpi	-0.812697		485.354	1.72088e-07	6.78399e-06	-5.22721	-4.50036	107.883	pseudobulk	DESeq2	LRT	glmGamPoi	scranSumFactors
ENSMUSG00000118471	3dpi	-1.48205		99.5655	1.72631e-07	6.79271e-06	-5.22663	-4.50008	107.822	pseudobulk	DESeq2	LRT	glmGamPoi	scranSumFactors
Pfn2	3dpi	-0.958574		1107.17	1.73436e-07	6.81173e-06	-5.22577	-4.49949	107.733	pseudobulk	DESeq2	LRT	glmGamPoi	scranSumFactors
Ptms	3dpi	-1.03115		1176.57	1.74255e-07	6.82178e-06	-5.22489	-4.49917	107.643	pseudobulk	DESeq2	LRT	glmGamPoi	scranSumFactors
Aqp9	3dpi	-1.92911		37.2764	1.74362e-07	6.82178e-06	-5.22478	-4.49917	107.631	pseudobulk	DESeq2	LRT	glmGamPoi	scranSumFactors
Rpl7	3dpi	-1.31746		767.654	1.74661e-07	6.82178e-06	-5.22446	-4.49917	107.598	pseudobulk	DESeq2	LRT	glmGamPoi	scranSumFactors
Gm14827	3dpi	0.823809		259.258	1.76228e-07	6.87028e-06	5.22281	4.49767	107.427	pseudobulk	DESeq2	LRT	glmGamPoi	scranSumFactors
Arpc3	3dpi	-0.902661		605.923	1.77862e-07	6.89933e-06	-5.2211	-4.49677	107.251	pseudobulk	DESeq2	LRT	glmGamPoi	scranSumFactors
S100a10	3dpi	-1.35953		121.8	1.779e-07	6.89933e-06	-5.22106	-4.49677	107.247	pseudobulk	DESeq2	LRT	glmGamPoi	scranSumFactors
Emc6	3dpi	-1.32536		368.094	1.77952e-07	6.89933e-06	-5.22101	-4.49677	107.241	pseudobulk	DESeq2	LRT	glmGamPoi	scranSumFactors
Ywhah	3dpi	-1.24743		1800.99	1.78753e-07	6.91768e-06	-5.22018	-4.49621	107.156	pseudobulk	DESeq2	LRT	glmGamPoi	scranSumFactors
Eif3i	3dpi	-1.16928		465.097	1.79211e-07	6.91958e-06	-5.2197	-4.49615	107.107	pseudobulk	DESeq2	LRT	glmGamPoi	scranSumFactors
Rps6	3dpi	-1.49975		493.403	1.79457e-07	6.91958e-06	-5.21945	-4.49615	107.081	pseudobulk	DESeq2	LRT	glmGamPoi	scranSumFactors
Myh10	3dpi	0.509163		1449.08	1.80376e-07	6.93995e-06	5.2185	4.49552	106.983	pseudobulk	DESeq2	LRT	glmGamPoi	scranSumFactors
Snap91	3dpi	0.453387		3458.91	1.80642e-07	6.93995e-06	5.21823	4.49552	106.955	pseudobulk	DESeq2	LRT	glmGamPoi	scranSumFactors
Calm3	3dpi	-1.00127		1094.42	1.83016e-07	7.01839e-06	-5.21581	-4.49313	106.707	pseudobulk	DESeq2	LRT	glmGamPoi	scranSumFactors
Rpl17	3dpi	-1.37926		795.071	1.84851e-07	7.06597e-06	-5.21396	-4.49169	106.518	pseudobulk	DESeq2	LRT	glmGamPoi	scranSumFactors
Tle5	3dpi	-1.11414		1383.77	1.85132e-07	7.06597e-06	-5.21368	-4.49169	106.489	pseudobulk	DESeq2	LRT	glmGamPoi	scranSumFactors
ENSMUSG00000098202	3dpi	0.573184		2301.92	1.8526e-07	7.06597e-06	5.21355	4.49169	106.476	pseudobulk	DESeq2	LRT	glmGamPoi	scranSumFactors
Rhob	3dpi	-1.18092		482.628	1.86757e-07	7.10915e-06	-5.21206	-4.49039	106.323	pseudobulk	DESeq2	LRT	glmGamPoi	scranSumFactors
Trmt112	3dpi	-1.44894		566.271	1.87065e-07	7.10915e-06	-5.21175	-4.49039	106.292	pseudobulk	DESeq2	LRT	glmGamPoi	scranSumFactors
Bsg	3dpi	-1.291		3096.33	1.88539e-07	7.15231e-06	-5.2103	-4.4891	106.143	pseudobulk	DESeq2	LRT	glmGamPoi	scranSumFactors
S100a16	3dpi	-1.82116		270.973	1.88978e-07	7.1561e-06	-5.20987	-4.48899	106.099	pseudobulk	DESeq2	LRT	glmGamPoi	scranSumFactors
Selenoh	3dpi	-1.56323		205.906	1.89663e-07	7.16918e-06	-5.20919	-4.4886	106.031	pseudobulk	DESeq2	LRT	glmGamPoi	scranSumFactors
Rex1bd	3dpi	-1.27269		327.713	1.90304e-07	7.18057e-06	-5.20857	-4.48826	105.967	pseudobulk	DESeq2	LRT	glmGamPoi	scranSumFactors
Msrb1	3dpi	-1.10746		118.718	1.91445e-07	7.20927e-06	-5.20746	-4.48741	105.854	pseudobulk	DESeq2	LRT	glmGamPoi	scranSumFactors
Ubb	3dpi	-1.86923		8317.68	1.91747e-07	7.20927e-06	-5.20717	-4.48741	105.825	pseudobulk	DESeq2	LRT	glmGamPoi	scranSumFactors
Ssu72	3dpi	-0.741661		848.137	1.95034e-07	7.30986e-06	-5.20401	-4.48446	105.505	pseudobulk	DESeq2	LRT	glmGamPoi	scranSumFactors
Sec24b	3dpi	0.432158		1830.56	1.95249e-07	7.30986e-06	5.20381	4.48446	105.484	pseudobulk	DESeq2	LRT	glmGamPoi	scranSumFactors
Tmem179b	3dpi	-1.31079		147.702	1.95668e-07	7.30986e-06	-5.20341	-4.48446	105.444	pseudobulk	DESeq2	LRT	glmGamPoi	scranSumFactors
Spcs1	3dpi	-1.5911		1042.15	1.95816e-07	7.30986e-06	-5.20327	-4.48446	105.429	pseudobulk	DESeq2	LRT	glmGamPoi	scranSumFactors
Eif3f	3dpi	-1.22287		436.235	1.96177e-07	7.30986e-06	-5.20292	-4.48446	105.395	pseudobulk	DESeq2	LRT	glmGamPoi	scranSumFactors
A4galt	3dpi	-1.28254		143.647	1.96498e-07	7.30986e-06	-5.20262	-4.48446	105.364	pseudobulk	DESeq2	LRT	glmGamPoi	scranSumFactors
Idh1	3dpi	-0.774979		259.824	1.977e-07	7.34164e-06	-5.20149	-4.48354	105.25	pseudobulk	DESeq2	LRT	glmGamPoi	scranSumFactors
Psmb6	3dpi	-1.35932		682.805	1.98174e-07	7.34636e-06	-5.20104	-4.4834	105.205	pseudobulk	DESeq2	LRT	glmGamPoi	scranSumFactors
Hecw1	3dpi	0.546125		4102.69	2.00183e-07	7.40186e-06	5.19917	4.48179	105.016	pseudobulk	DESeq2	LRT	glmGamPoi	scranSumFactors
Atp5b	3dpi	-1.02599		1761.7	2.00653e-07	7.40186e-06	-5.19873	-4.48179	104.972	pseudobulk	DESeq2	LRT	glmGamPoi	scranSumFactors
Pomp	3dpi	-1.33158		622.465	2.00815e-07	7.40186e-06	-5.19858	-4.48179	104.956	pseudobulk	DESeq2	LRT	glmGamPoi	scranSumFactors
Selenok	3dpi	-1.1675		1859.8	2.01073e-07	7.40186e-06	-5.19834	-4.48179	104.932	pseudobulk	DESeq2	LRT	glmGamPoi	scranSumFactors
Tmem50a	3dpi	-0.915291		827.782	2.03109e-07	7.44926e-06	-5.19647	-4.48043	104.744	pseudobulk	DESeq2	LRT	glmGamPoi	scranSumFactors
Lxn	3dpi	-1.95687		101.96	2.03167e-07	7.44926e-06	-5.19642	-4.48043	104.739	pseudobulk	DESeq2	LRT	glmGamPoi	scranSumFactors
ENSMUSG00000115289	3dpi	-1.0045		579.005	2.03418e-07	7.44926e-06	-5.19619	-4.48043	104.716	pseudobulk	DESeq2	LRT	glmGamPoi	scranSumFactors
Bhlhe41	3dpi	-0.720539		643.826	2.07744e-07	7.59453e-06	-5.19227	-4.47631	104.323	pseudobulk	DESeq2	LRT	glmGamPoi	scranSumFactors
2700062C07Rik	3dpi	-1.15943		226.154	2.09177e-07	7.6222e-06	-5.19099	-4.47553	104.195	pseudobulk	DESeq2	LRT	glmGamPoi	scranSumFactors
ENSMUSG00000040904	3dpi	-1.50553		1276.24	2.09223e-07	7.6222e-06	-5.19095	-4.47553	104.191	pseudobulk	DESeq2	LRT	glmGamPoi	scranSumFactors
Glud1	3dpi	-0.535429		1785.58	2.12753e-07	7.73748e-06	-5.18783	-4.47232	103.88	pseudobulk	DESeq2	LRT	glmGamPoi	scranSumFactors
Atp6v0e	3dpi	-0.581455		686.986	2.13335e-07	7.74532e-06	-5.18733	-4.47211	103.83	pseudobulk	DESeq2	LRT	glmGamPoi	scranSumFactors
C1qbp	3dpi	-1.24085		326.378	2.17106e-07	7.86743e-06	-5.18406	-4.46876	103.505	pseudobulk	DESeq2	LRT	glmGamPoi	scranSumFactors
Sdhb	3dpi	-0.826093		1117.19	2.17619e-07	7.86743e-06	-5.18362	-4.46876	103.462	pseudobulk	DESeq2	LRT	glmGamPoi	scranSumFactors
Ica1	3dpi	0.447177		2312.49	2.17816e-07	7.86743e-06	5.18345	4.46876	103.445	pseudobulk	DESeq2	LRT	glmGamPoi	scranSumFactors
Csnk2b	3dpi	-1.35293		312.801	2.19793e-07	7.92529e-06	-5.18177	-4.46719	103.278	pseudobulk	DESeq2	LRT	glmGamPoi	scranSumFactors
Magoh	3dpi	-0.810431		264.033	2.20274e-07	7.9291e-06	-5.18136	-4.46709	103.238	pseudobulk	DESeq2	LRT	glmGamPoi	scranSumFactors
Pgk1	3dpi	-1.04957		641.378	2.20779e-07	7.93379e-06	-5.18093	-4.46696	103.196	pseudobulk	DESeq2	LRT	glmGamPoi	scranSumFactors
Ctsh	3dpi	-2.42974		38.1373	2.22785e-07	7.97112e-06	-5.17925	-4.46596	103.029	pseudobulk	DESeq2	LRT	glmGamPoi	scranSumFactors
Trappc2l	3dpi	-1.36278		434.796	2.22863e-07	7.97112e-06	-5.17918	-4.46596	103.023	pseudobulk	DESeq2	LRT	glmGamPoi	scranSumFactors
Capza2	3dpi	-0.69001		802.378	2.2295e-07	7.97112e-06	-5.17911	-4.46596	103.015	pseudobulk	DESeq2	LRT	glmGamPoi	scranSumFactors
Drap1	3dpi	-1.07459		790.663	2.2361e-07	7.98121e-06	-5.17856	-4.46569	102.961	pseudobulk	DESeq2	LRT	glmGamPoi	scranSumFactors
Ppib	3dpi	-0.689622		1774.65	2.25171e-07	8.02336e-06	-5.17726	-4.46456	102.833	pseudobulk	DESeq2	LRT	glmGamPoi	scranSumFactors
Mrps18c	3dpi	-0.912073		280.619	2.2574e-07	8.03011e-06	-5.17679	-4.46438	102.787	pseudobulk	DESeq2	LRT	glmGamPoi	scranSumFactors
Rpsa	3dpi	-1.28874		1489.49	2.27076e-07	8.06405e-06	-5.17569	-4.46348	102.678	pseudobulk	DESeq2	LRT	glmGamPoi	scranSumFactors
4930469K13Rik	3dpi	-1.18743		197.01	2.29573e-07	8.13324e-06	-5.17364	-4.46165	102.478	pseudobulk	DESeq2	LRT	glmGamPoi	scranSumFactors
Tmem14c	3dpi	-1.14048		323.972	2.29794e-07	8.13324e-06	-5.17346	-4.46165	102.46	pseudobulk	DESeq2	LRT	glmGamPoi	scranSumFactors
Chchd10	3dpi	-1.82944		1666.84	2.31078e-07	8.15251e-06	-5.17242	-4.46114	102.358	pseudobulk	DESeq2	LRT	glmGamPoi	scranSumFactors
Slc2a1	3dpi	-1.21107		251.933	2.31225e-07	8.15251e-06	-5.1723	-4.46114	102.346	pseudobulk	DESeq2	LRT	glmGamPoi	scranSumFactors
Nme1	3dpi	-1.5988		806.331	2.31542e-07	8.15251e-06	-5.17205	-4.46114	102.321	pseudobulk	DESeq2	LRT	glmGamPoi	scranSumFactors
Mrps21	3dpi	-0.836901		528.015	2.31881e-07	8.15251e-06	-5.17177	-4.46114	102.295	pseudobulk	DESeq2	LRT	glmGamPoi	scranSumFactors
Grip1	3dpi	0.648363		8454.51	2.32387e-07	8.15672e-06	5.17137	4.46103	102.255	pseudobulk	DESeq2	LRT	glmGamPoi	scranSumFactors
Chmp2a	3dpi	-1.26203		567.353	2.33519e-07	8.16787e-06	-5.17046	-4.46074	102.166	pseudobulk	DESeq2	LRT	glmGamPoi	scranSumFactors
Otub1	3dpi	-0.920942		662.92	2.33846e-07	8.16787e-06	-5.1702	-4.46074	102.14	pseudobulk	DESeq2	LRT	glmGamPoi	scranSumFactors
Mrpl42	3dpi	-0.825471		537.699	2.33865e-07	8.16787e-06	-5.17018	-4.46074	102.139	pseudobulk	DESeq2	LRT	glmGamPoi	scranSumFactors
Ypel3	3dpi	-1.06372		1354.14	2.36517e-07	8.2446e-06	-5.16807	-4.45873	101.933	pseudobulk	DESeq2	LRT	glmGamPoi	scranSumFactors
Rack1	3dpi	-1.13433		521.811	2.36842e-07	8.2446e-06	-5.16782	-4.45873	101.908	pseudobulk	DESeq2	LRT	glmGamPoi	scranSumFactors
Tenm4	3dpi	0.61579		7385.98	2.39487e-07	8.32295e-06	5.16574	4.4567	101.706	pseudobulk	DESeq2	LRT	glmGamPoi	scranSumFactors
Tmsb4x	3dpi	-1.30335		2601.14	2.40745e-07	8.35294e-06	-5.16476	-4.45593	101.61	pseudobulk	DESeq2	LRT	glmGamPoi	scranSumFactors
Iftap	3dpi	-0.626647		411.862	2.41485e-07	8.36488e-06	-5.16419	-4.45563	101.555	pseudobulk	DESeq2	LRT	glmGamPoi	scranSumFactors
Naca	3dpi	-1.34527		1357.87	2.43454e-07	8.41928e-06	-5.16267	-4.45424	101.407	pseudobulk	DESeq2	LRT	glmGamPoi	scranSumFactors
Rpl9	3dpi	-1.252		1736.06	2.45088e-07	8.46196e-06	-5.16142	-4.45315	101.286	pseudobulk	DESeq2	LRT	glmGamPoi	scranSumFactors
Polr2i	3dpi	-1.33985		277.354	2.46757e-07	8.48773e-06	-5.16015	-4.4525	101.163	pseudobulk	DESeq2	LRT	glmGamPoi	scranSumFactors
Tmem178b	3dpi	0.525936		8919.93	2.46835e-07	8.48773e-06	5.16009	4.4525	101.157	pseudobulk	DESeq2	LRT	glmGamPoi	scranSumFactors
Praf2	3dpi	-1.30353		257.623	2.4704e-07	8.48773e-06	-5.15993	-4.4525	101.142	pseudobulk	DESeq2	LRT	glmGamPoi	scranSumFactors
Uqcc3	3dpi	-1.14403		175.065	2.52337e-07	8.65565e-06	-5.15596	-4.44829	100.759	pseudobulk	DESeq2	LRT	glmGamPoi	scranSumFactors
Rps7	3dpi	-1.08406		541.945	2.52884e-07	8.66037e-06	-5.15555	-4.44817	100.72	pseudobulk	DESeq2	LRT	glmGamPoi	scranSumFactors
B4galt5	3dpi	0.577299		619.685	2.55121e-07	8.70571e-06	5.1539	4.44705	100.561	pseudobulk	DESeq2	LRT	glmGamPoi	scranSumFactors
ENSMUSG00000096006	3dpi	-1.50127		127.291	2.5524e-07	8.70571e-06	-5.15382	-4.44705	100.552	pseudobulk	DESeq2	LRT	glmGamPoi	scranSumFactors
Atp6v1d	3dpi	-0.846467		1113.99	2.55444e-07	8.70571e-06	-5.15366	-4.44705	100.538	pseudobulk	DESeq2	LRT	glmGamPoi	scranSumFactors
Mdh2	3dpi	-1.05543		1144.03	2.56863e-07	8.73995e-06	-5.15263	-4.44621	100.438	pseudobulk	DESeq2	LRT	glmGamPoi	scranSumFactors
Mrpl23-ps1	3dpi	-1.46643		127.177	2.57338e-07	8.74206e-06	-5.15228	-4.44616	100.405	pseudobulk	DESeq2	LRT	glmGamPoi	scranSumFactors
Ier3	3dpi	-1.14624		143.808	2.59078e-07	8.78704e-06	-5.15102	-4.44505	100.284	pseudobulk	DESeq2	LRT	glmGamPoi	scranSumFactors
Stmn1	3dpi	-1.43987		2903.74	2.60119e-07	8.80818e-06	-5.15027	-4.44454	100.212	pseudobulk	DESeq2	LRT	glmGamPoi	scranSumFactors
Mrps12	3dpi	-1.12085		519.508	2.62014e-07	8.84481e-06	-5.1489	-4.44364	100.082	pseudobulk	DESeq2	LRT	glmGamPoi	scranSumFactors
Lap3	3dpi	-1.11252		274.193	2.62286e-07	8.84481e-06	-5.14871	-4.44364	100.063	pseudobulk	DESeq2	LRT	glmGamPoi	scranSumFactors
Flnb	3dpi	0.525688		1974.93	2.62456e-07	8.84481e-06	5.14859	4.44364	100.051	pseudobulk	DESeq2	LRT	glmGamPoi	scranSumFactors
Arl6ip5	3dpi	-0.929765		999.44	2.63334e-07	8.86028e-06	-5.14796	-4.44327	99.9914	pseudobulk	DESeq2	LRT	glmGamPoi	scranSumFactors
Rnf227	3dpi	-1.28761		1143.18	2.64066e-07	8.86882e-06	-5.14744	-4.44306	99.9417	pseudobulk	DESeq2	LRT	glmGamPoi	scranSumFactors
Pdcd5	3dpi	-1.08129		460.569	2.64428e-07	8.86882e-06	-5.14718	-4.44306	99.9172	pseudobulk	DESeq2	LRT	glmGamPoi	scranSumFactors
Mrpl52	3dpi	-1.06711		578.789	2.65584e-07	8.89025e-06	-5.14636	-4.44254	99.8391	pseudobulk	DESeq2	LRT	glmGamPoi	scranSumFactors
ENSMUSG00000070392	3dpi	-1.9864		40.9181	2.65908e-07	8.89025e-06	-5.14613	-4.44254	99.8173	pseudobulk	DESeq2	LRT	glmGamPoi	scranSumFactors
Rnf5	3dpi	-1.07816		212.756	2.6759e-07	8.93234e-06	-5.14495	-4.44153	99.7045	pseudobulk	DESeq2	LRT	glmGamPoi	scranSumFactors
Hras	3dpi	-1.18234		672.572	2.68195e-07	8.93843e-06	-5.14453	-4.44138	99.6641	pseudobulk	DESeq2	LRT	glmGamPoi	scranSumFactors
Yif1b	3dpi	-1.12158		292.487	2.69411e-07	8.96481e-06	-5.14368	-4.44074	99.5833	pseudobulk	DESeq2	LRT	glmGamPoi	scranSumFactors
Irak4	3dpi	-0.827927		207.965	2.7023e-07	8.97793e-06	-5.14311	-4.44043	99.5291	pseudobulk	DESeq2	LRT	glmGamPoi	scranSumFactors
Dgcr6	3dpi	-0.961594		338.537	2.71293e-07	8.9991e-06	-5.14237	-4.43992	99.4591	pseudobulk	DESeq2	LRT	glmGamPoi	scranSumFactors
Pla2g12a	3dpi	-0.78074		243.095	2.72077e-07	9.01094e-06	-5.14183	-4.43964	99.4077	pseudobulk	DESeq2	LRT	glmGamPoi	scranSumFactors
Atxn7l3b	3dpi	-0.914907		1051.41	2.73166e-07	9.03286e-06	-5.14108	-4.43912	99.3365	pseudobulk	DESeq2	LRT	glmGamPoi	scranSumFactors
CYTB	3dpi	-1.5883		273.677	2.76042e-07	9.11148e-06	-5.13911	-4.43725	99.15	pseudobulk	DESeq2	LRT	glmGamPoi	scranSumFactors
Rtraf	3dpi	-1.03668		532.357	2.76406e-07	9.11148e-06	-5.13886	-4.43725	99.1266	pseudobulk	DESeq2	LRT	glmGamPoi	scranSumFactors
Cstb	3dpi	-1.46565		255.153	2.78765e-07	9.16777e-06	-5.13727	-4.43593	98.9755	pseudobulk	DESeq2	LRT	glmGamPoi	scranSumFactors
Mrpl18	3dpi	-0.919272		381.291	2.79169e-07	9.16777e-06	-5.13699	-4.43593	98.9498	pseudobulk	DESeq2	LRT	glmGamPoi	scranSumFactors
Nme2	3dpi	-1.33851		480.712	2.79714e-07	9.16777e-06	-5.13663	-4.43593	98.9152	pseudobulk	DESeq2	LRT	glmGamPoi	scranSumFactors
Orai1	3dpi	-1.01425		156.768	2.79849e-07	9.16777e-06	-5.13654	-4.43593	98.9067	pseudobulk	DESeq2	LRT	glmGamPoi	scranSumFactors
Mrpl55	3dpi	-1.07189		317.494	2.80698e-07	9.18135e-06	-5.13597	-4.43561	98.8529	pseudobulk	DESeq2	LRT	glmGamPoi	scranSumFactors
Kcnj16	3dpi	-1.60721		90.3736	2.81419e-07	9.19069e-06	-5.13548	-4.43539	98.8074	pseudobulk	DESeq2	LRT	glmGamPoi	scranSumFactors
Alyref	3dpi	-1.16163		170.132	2.83298e-07	9.2378e-06	-5.13423	-4.43429	98.6894	pseudobulk	DESeq2	LRT	glmGamPoi	scranSumFactors
C2cd5	3dpi	0.43007		2477.25	2.84753e-07	9.27094e-06	5.13327	4.43351	98.5987	pseudobulk	DESeq2	LRT	glmGamPoi	scranSumFactors
Gm1673	3dpi	-1.46673		1712.52	2.85602e-07	9.28427e-06	-5.13271	-4.4332	98.5461	pseudobulk	DESeq2	LRT	glmGamPoi	scranSumFactors
Nefl	3dpi	-0.907462		604.146	2.8623e-07	9.29038e-06	-5.1323	-4.43306	98.5073	pseudobulk	DESeq2	LRT	glmGamPoi	scranSumFactors
Eloc	3dpi	-0.752042		558.808	2.87234e-07	9.30869e-06	-5.13164	-4.43264	98.4453	pseudobulk	DESeq2	LRT	glmGamPoi	scranSumFactors
Zfyve21	3dpi	-1.06876		117.935	2.88474e-07	9.33453e-06	-5.13083	-4.43204	98.3693	pseudobulk	DESeq2	LRT	glmGamPoi	scranSumFactors
Chrac1	3dpi	-1.10312		171.907	2.90773e-07	9.39327e-06	-5.12933	-4.43069	98.2292	pseudobulk	DESeq2	LRT	glmGamPoi	scranSumFactors
Snrpd3	3dpi	-1.03695		424.874	2.91453e-07	9.39327e-06	-5.12889	-4.43069	98.1879	pseudobulk	DESeq2	LRT	glmGamPoi	scranSumFactors
Rpl15	3dpi	-1.67706		250.676	2.91623e-07	9.39327e-06	-5.12878	-4.43069	98.1777	pseudobulk	DESeq2	LRT	glmGamPoi	scranSumFactors
Vps28	3dpi	-1.35336		673.968	2.92217e-07	9.39808e-06	-5.1284	-4.43058	98.1418	pseudobulk	DESeq2	LRT	glmGamPoi	scranSumFactors
Atp5d	3dpi	-1.23259		1218.84	2.93105e-07	9.41233e-06	-5.12783	-4.43025	98.0883	pseudobulk	DESeq2	LRT	glmGamPoi	scranSumFactors
Pkm	3dpi	-0.916987		2123.06	2.94709e-07	9.44947e-06	-5.1268	-4.4294	97.9922	pseudobulk	DESeq2	LRT	glmGamPoi	scranSumFactors
Cuta	3dpi	-1.25786		489.601	2.96676e-07	9.49813e-06	-5.12555	-4.42829	97.8752	pseudobulk	DESeq2	LRT	glmGamPoi	scranSumFactors
Rab9	3dpi	-0.749091		325.021	2.98359e-07	9.52754e-06	-5.12448	-4.42763	97.7758	pseudobulk	DESeq2	LRT	glmGamPoi	scranSumFactors
Tlcd1	3dpi	-1.85176		251.557	2.98497e-07	9.52754e-06	-5.12439	-4.42763	97.7677	pseudobulk	DESeq2	LRT	glmGamPoi	scranSumFactors
Cox7a2l	3dpi	-0.861306		709.956	3.00741e-07	9.58469e-06	-5.12298	-4.42634	97.6363	pseudobulk	DESeq2	LRT	glmGamPoi	scranSumFactors
Hsd17b11	3dpi	-0.91349		238.106	3.01751e-07	9.60239e-06	-5.12235	-4.42594	97.5774	pseudobulk	DESeq2	LRT	glmGamPoi	scranSumFactors
Rnaset2b	3dpi	-1.15609		222.193	3.03459e-07	9.64223e-06	-5.12129	-4.42504	97.4785	pseudobulk	DESeq2	LRT	glmGamPoi	scranSumFactors
D430041D05Rik	3dpi	0.590084		2455.83	3.09054e-07	9.80333e-06	5.11784	4.42147	97.1589	pseudobulk	DESeq2	LRT	glmGamPoi	scranSumFactors
Sncb	3dpi	-1.20459		1471.11	3.09457e-07	9.80333e-06	-5.11759	-4.42147	97.1362	pseudobulk	DESeq2	LRT	glmGamPoi	scranSumFactors
Fkbp3	3dpi	-1.14383		1294.09	3.10195e-07	9.80401e-06	-5.11715	-4.42145	97.0946	pseudobulk	DESeq2	LRT	glmGamPoi	scranSumFactors
Slc25a4	3dpi	-1.21686		2440.7	3.11009e-07	9.80401e-06	-5.11665	-4.42145	97.0489	pseudobulk	DESeq2	LRT	glmGamPoi	scranSumFactors
Tomm5	3dpi	-1.10036		402.648	3.11085e-07	9.80401e-06	-5.1166	-4.42145	97.0446	pseudobulk	DESeq2	LRT	glmGamPoi	scranSumFactors
Vdac2	3dpi	-0.961284		1147.05	3.11334e-07	9.80401e-06	-5.11645	-4.42145	97.0306	pseudobulk	DESeq2	LRT	glmGamPoi	scranSumFactors
Sec61b	3dpi	-1.43371		333.779	3.12296e-07	9.81967e-06	-5.11587	-4.42111	96.9768	pseudobulk	DESeq2	LRT	glmGamPoi	scranSumFactors
Tmem128	3dpi	-0.823863		467.385	3.13287e-07	9.83618e-06	-5.11527	-4.42074	96.9216	pseudobulk	DESeq2	LRT	glmGamPoi	scranSumFactors
Tma7	3dpi	-1.01644		922.854	3.15185e-07	9.8811e-06	-5.11413	-4.41976	96.8164	pseudobulk	DESeq2	LRT	glmGamPoi	scranSumFactors
S100a6	3dpi	-2.48326		129.474	3.17906e-07	9.95164e-06	-5.11251	-4.41822	96.6668	pseudobulk	DESeq2	LRT	glmGamPoi	scranSumFactors
Eif2s2	3dpi	-0.884934		998.582	3.2006e-07	1.00042e-05	-5.11123	-4.41708	96.5495	pseudobulk	DESeq2	LRT	glmGamPoi	scranSumFactors
Dbx2	3dpi	-1.55967		219.012	3.23382e-07	1.00931e-05	-5.10928	-4.41517	96.3703	pseudobulk	DESeq2	LRT	glmGamPoi	scranSumFactors
Arf5	3dpi	-0.708826		1185.19	3.26254e-07	1.01678e-05	-5.10761	-4.41357	96.217	pseudobulk	DESeq2	LRT	glmGamPoi	scranSumFactors
Rpl23	3dpi	-1.4018		1659.37	3.27258e-07	1.01723e-05	-5.10703	-4.41348	96.1639	pseudobulk	DESeq2	LRT	glmGamPoi	scranSumFactors
Sfr1	3dpi	-1.10316		596.247	3.27361e-07	1.01723e-05	-5.10697	-4.41348	96.1585	pseudobulk	DESeq2	LRT	glmGamPoi	scranSumFactors
Pfdn4	3dpi	-0.815923		371.269	3.29669e-07	1.02289e-05	-5.10564	-4.41228	96.0369	pseudobulk	DESeq2	LRT	glmGamPoi	scranSumFactors
ENSMUSG00000110040	3dpi	-0.857199		356.348	3.36923e-07	1.0389e-05	-5.10153	-4.40891	95.6613	pseudobulk	DESeq2	LRT	glmGamPoi	scranSumFactors
ENSMUSG00000064339	3dpi	-1.05989		1707.7	3.3709e-07	1.0389e-05	-5.10143	-4.40891	95.6528	pseudobulk	DESeq2	LRT	glmGamPoi	scranSumFactors
Gm15459	3dpi	1.1387		161.7	3.37134e-07	1.0389e-05	5.10141	4.40891	95.6506	pseudobulk	DESeq2	LRT	glmGamPoi	scranSumFactors
Aurkaip1	3dpi	-1.38336		447.468	3.37293e-07	1.0389e-05	-5.10132	-4.40891	95.6424	pseudobulk	DESeq2	LRT	glmGamPoi	scranSumFactors
Srp19	3dpi	-0.85209		542.036	3.37717e-07	1.0389e-05	-5.10108	-4.40891	95.6208	pseudobulk	DESeq2	LRT	glmGamPoi	scranSumFactors
Rpl8	3dpi	-1.33412		1767.34	3.37778e-07	1.0389e-05	-5.10105	-4.40891	95.6177	pseudobulk	DESeq2	LRT	glmGamPoi	scranSumFactors
ENSMUSG00000052188	3dpi	-1.81786		406.432	3.39381e-07	1.04231e-05	-5.10015	-4.4082	95.5362	pseudobulk	DESeq2	LRT	glmGamPoi	scranSumFactors
Asic2	3dpi	0.725081		21809	3.41275e-07	1.04661e-05	5.0991	4.40731	95.4405	pseudobulk	DESeq2	LRT	glmGamPoi	scranSumFactors
Bag1	3dpi	-1.04212		371.522	3.41833e-07	1.0468e-05	-5.09879	-4.40727	95.4124	pseudobulk	DESeq2	LRT	glmGamPoi	scranSumFactors
Atp13a5	3dpi	-1.4884		268.239	3.43522e-07	1.05045e-05	-5.09786	-4.40652	95.3278	pseudobulk	DESeq2	LRT	glmGamPoi	scranSumFactors
Nat8f7	3dpi	-1.80511		46.2984	3.51726e-07	1.07399e-05	-5.09338	-4.40172	94.9232	pseudobulk	DESeq2	LRT	glmGamPoi	scranSumFactors
Tceal1	3dpi	-1.42177		310.38	3.53239e-07	1.07705e-05	-5.09257	-4.4011	94.8498	pseudobulk	DESeq2	LRT	glmGamPoi	scranSumFactors
Rraga	3dpi	-1.30728		550.566	3.56922e-07	1.08671e-05	-5.09061	-4.39916	94.6727	pseudobulk	DESeq2	LRT	glmGamPoi	scranSumFactors
Gpcpd1	3dpi	-0.4287		1986.64	3.58119e-07	1.08878e-05	-5.08997	-4.39875	94.6156	pseudobulk	DESeq2	LRT	glmGamPoi	scranSumFactors
Them6	3dpi	-1.12499		190.529	3.58886e-07	1.08955e-05	-5.08956	-4.39859	94.5791	pseudobulk	DESeq2	LRT	glmGamPoi	scranSumFactors
Rer1	3dpi	-0.990357		574.812	3.61264e-07	1.09281e-05	-5.08831	-4.39794	94.4665	pseudobulk	DESeq2	LRT	glmGamPoi	scranSumFactors
ENSMUSG00000081604	3dpi	-1.20773		349.597	3.61278e-07	1.09281e-05	-5.0883	-4.39794	94.4658	pseudobulk	DESeq2	LRT	glmGamPoi	scranSumFactors
Prelid3b	3dpi	-1.11823		165.939	3.61513e-07	1.09281e-05	-5.08818	-4.39794	94.4548	pseudobulk	DESeq2	LRT	glmGamPoi	scranSumFactors
ENSMUSG00000109362	3dpi	0.602648		1329.92	3.66128e-07	1.1037e-05	5.08577	4.39579	94.239	pseudobulk	DESeq2	LRT	glmGamPoi	scranSumFactors
Mpdu1	3dpi	-0.758991		271.968	3.66157e-07	1.1037e-05	-5.08576	-4.39579	94.2376	pseudobulk	DESeq2	LRT	glmGamPoi	scranSumFactors
Mllt11	3dpi	-0.865968		1126.03	3.68008e-07	1.10769e-05	-5.0848	-4.39501	94.152	pseudobulk	DESeq2	LRT	glmGamPoi	scranSumFactors
Zrsr2	3dpi	-0.764714		345.994	3.70284e-07	1.11296e-05	-5.08363	-4.39398	94.0473	pseudobulk	DESeq2	LRT	glmGamPoi	scranSumFactors
Eef1b2	3dpi	-1.26843		910.579	3.729e-07	1.11923e-05	-5.0823	-4.39276	93.928	pseudobulk	DESeq2	LRT	glmGamPoi	scranSumFactors
Slc22a14	3dpi	0.480402		1202.53	3.74486e-07	1.12165e-05	5.08149	4.39229	93.856	pseudobulk	DESeq2	LRT	glmGamPoi	scranSumFactors
Rpl4	3dpi	-1.10303		582.772	3.74769e-07	1.12165e-05	-5.08135	-4.39229	93.8432	pseudobulk	DESeq2	LRT	glmGamPoi	scranSumFactors
Ttc9b	3dpi	-1.36574		203.779	3.8235e-07	1.14257e-05	-5.07754	-4.38827	93.5047	pseudobulk	DESeq2	LRT	glmGamPoi	scranSumFactors
Rab3a	3dpi	-1.17541		1243.49	3.83352e-07	1.14257e-05	-5.07704	-4.38827	93.4605	pseudobulk	DESeq2	LRT	glmGamPoi	scranSumFactors
ENSMUSG00000089840	3dpi	-1.89253		62.455	3.8338e-07	1.14257e-05	-5.07703	-4.38827	93.4593	pseudobulk	DESeq2	LRT	glmGamPoi	scranSumFactors
Hspe1	3dpi	-1.52755		833.457	3.84208e-07	1.14343e-05	-5.07662	-4.3881	93.4229	pseudobulk	DESeq2	LRT	glmGamPoi	scranSumFactors
Hectd4	3dpi	0.432598		2682.48	3.85206e-07	1.14478e-05	5.07613	4.38785	93.3792	pseudobulk	DESeq2	LRT	glmGamPoi	scranSumFactors
Rps9	3dpi	-1.30687		1115.21	3.86214e-07	1.14503e-05	-5.07563	-4.3878	93.3351	pseudobulk	DESeq2	LRT	glmGamPoi	scranSumFactors
Dhrs3	3dpi	-1.90869		76.0378	3.86374e-07	1.14503e-05	-5.07555	-4.3878	93.3281	pseudobulk	DESeq2	LRT	glmGamPoi	scranSumFactors
ENSMUSG00000118125	3dpi	-1.17413		269.203	3.93462e-07	1.16441e-05	-5.07209	-4.38415	93.0223	pseudobulk	DESeq2	LRT	glmGamPoi	scranSumFactors
Nutf2-ps1	3dpi	-1.32256		95.1938	3.96881e-07	1.17288e-05	-5.07045	-4.38257	92.877	pseudobulk	DESeq2	LRT	glmGamPoi	scranSumFactors
Swi5	3dpi	-0.926976		822.122	3.9837e-07	1.17564e-05	-5.06974	-4.38206	92.8142	pseudobulk	DESeq2	LRT	glmGamPoi	scranSumFactors
Uggt2	3dpi	0.40391		1839.17	3.99078e-07	1.17608e-05	5.0694	4.38198	92.7844	pseudobulk	DESeq2	LRT	glmGamPoi	scranSumFactors
Slc4a4	3dpi	-1.18288		3622.73	4.00468e-07	1.17854e-05	-5.06874	-4.38152	92.7262	pseudobulk	DESeq2	LRT	glmGamPoi	scranSumFactors
Gpx8	3dpi	-2.17769		25.3499	4.01279e-07	1.17928e-05	-5.06835	-4.38138	92.6923	pseudobulk	DESeq2	LRT	glmGamPoi	scranSumFactors
Sypl	3dpi	-0.741864		608.289	4.02556e-07	1.18139e-05	-5.06775	-4.38099	92.6391	pseudobulk	DESeq2	LRT	glmGamPoi	scranSumFactors
Pex2	3dpi	-0.762689		334.061	4.04488e-07	1.18495e-05	-5.06683	-4.38034	92.559	pseudobulk	DESeq2	LRT	glmGamPoi	scranSumFactors
Frmd4a	3dpi	0.535819		20426.1	4.04889e-07	1.18495e-05	5.06664	4.38034	92.5424	pseudobulk	DESeq2	LRT	glmGamPoi	scranSumFactors
Tnfaip8	3dpi	-1.73489		172.727	4.14937e-07	1.21267e-05	-5.06197	-4.3753	92.1332	pseudobulk	DESeq2	LRT	glmGamPoi	scranSumFactors
Mrpl54	3dpi	-1.17024		303.347	4.16922e-07	1.21679e-05	-5.06106	-4.37456	92.0538	pseudobulk	DESeq2	LRT	glmGamPoi	scranSumFactors
ENSMUSG00000117461	3dpi	-1.22459		163.274	4.22292e-07	1.23076e-05	-5.05862	-4.37207	91.841	pseudobulk	DESeq2	LRT	glmGamPoi	scranSumFactors
Srrm3	3dpi	0.451142		2171.95	4.22988e-07	1.23109e-05	5.05831	4.37201	91.8136	pseudobulk	DESeq2	LRT	glmGamPoi	scranSumFactors
Sec62	3dpi	-1.01221		2505.73	4.25489e-07	1.23667e-05	-5.05719	-4.37102	91.7158	pseudobulk	DESeq2	LRT	glmGamPoi	scranSumFactors
Higd2a	3dpi	-1.04816		711.049	4.27622e-07	1.24116e-05	-5.05623	-4.37023	91.6328	pseudobulk	DESeq2	LRT	glmGamPoi	scranSumFactors
Polr2e	3dpi	-1.10353		279.598	4.36518e-07	1.26381e-05	-5.0523	-4.36628	91.2921	pseudobulk	DESeq2	LRT	glmGamPoi	scranSumFactors
Atg101	3dpi	-1.15292		149.074	4.37037e-07	1.26381e-05	-5.05207	-4.36628	91.2725	pseudobulk	DESeq2	LRT	glmGamPoi	scranSumFactors
Eif1ad	3dpi	-0.9778		131.327	4.37221e-07	1.26381e-05	-5.05199	-4.36628	91.2655	pseudobulk	DESeq2	LRT	glmGamPoi	scranSumFactors
Nudc	3dpi	-1.05871		707.733	4.41199e-07	1.27357e-05	-5.05026	-4.3646	91.116	pseudobulk	DESeq2	LRT	glmGamPoi	scranSumFactors
Phyhipl	3dpi	-0.693256		1347.05	4.44054e-07	1.27884e-05	-5.04903	-4.3637	91.0097	pseudobulk	DESeq2	LRT	glmGamPoi	scranSumFactors
Atp6v0c	3dpi	-1.25269		8280.34	4.44234e-07	1.27884e-05	-5.04895	-4.3637	91.003	pseudobulk	DESeq2	LRT	glmGamPoi	scranSumFactors
Gng11	3dpi	-1.95103		322.612	4.47246e-07	1.28569e-05	-5.04766	-4.36253	90.8917	pseudobulk	DESeq2	LRT	glmGamPoi	scranSumFactors
Esd	3dpi	-1.06014		540.519	4.4783e-07	1.28569e-05	-5.04741	-4.36253	90.8703	pseudobulk	DESeq2	LRT	glmGamPoi	scranSumFactors
Hcfc1r1	3dpi	-1.43204		710.825	4.49045e-07	1.28743e-05	-5.0469	-4.36223	90.8257	pseudobulk	DESeq2	LRT	glmGamPoi	scranSumFactors
Crip2	3dpi	-1.43067		223.154	4.50154e-07	1.28886e-05	-5.04642	-4.36199	90.7851	pseudobulk	DESeq2	LRT	glmGamPoi	scranSumFactors
Sap18b	3dpi	-1.4637		177.602	4.53014e-07	1.29529e-05	-5.04521	-4.3609	90.6811	pseudobulk	DESeq2	LRT	glmGamPoi	scranSumFactors
Gstp2	3dpi	-0.805597		262.156	4.56075e-07	1.30228e-05	-5.04393	-4.35972	90.5705	pseudobulk	DESeq2	LRT	glmGamPoi	scranSumFactors
Cd52	3dpi	-1.39317		71.5687	4.60013e-07	1.31175e-05	-5.04228	-4.35814	90.4296	pseudobulk	DESeq2	LRT	glmGamPoi	scranSumFactors
Gamt	3dpi	-1.43363		137.342	4.67101e-07	1.32861e-05	-5.03936	-4.35534	90.1794	pseudobulk	DESeq2	LRT	glmGamPoi	scranSumFactors
Psmc5	3dpi	-0.992144		791.511	4.67779e-07	1.32861e-05	-5.03908	-4.35534	90.1557	pseudobulk	DESeq2	LRT	glmGamPoi	scranSumFactors
Rheb	3dpi	-0.691184		1213.33	4.67811e-07	1.32861e-05	-5.03907	-4.35534	90.1545	pseudobulk	DESeq2	LRT	glmGamPoi	scranSumFactors
Shroom2	3dpi	-0.689767		417.72	4.68458e-07	1.32866e-05	-5.0388	-4.35533	90.1319	pseudobulk	DESeq2	LRT	glmGamPoi	scranSumFactors
Mfge8	3dpi	-2.00366		221.2	4.72195e-07	1.33746e-05	-5.03728	-4.35388	90.0022	pseudobulk	DESeq2	LRT	glmGamPoi	scranSumFactors
Ube2m	3dpi	-0.933443		788.851	4.74867e-07	1.34323e-05	-5.0362	-4.35294	89.9102	pseudobulk	DESeq2	LRT	glmGamPoi	scranSumFactors
ENSMUSG00000114036	3dpi	-0.857681		349.783	4.75519e-07	1.34328e-05	-5.03594	-4.35293	89.8879	pseudobulk	DESeq2	LRT	glmGamPoi	scranSumFactors
Nkx6-2	3dpi	-1.65245		336.402	4.76614e-07	1.34457e-05	-5.0355	-4.35272	89.8504	pseudobulk	DESeq2	LRT	glmGamPoi	scranSumFactors
Scand1	3dpi	-1.31572		576.811	4.7945e-07	1.35077e-05	-5.03436	-4.35171	89.7538	pseudobulk	DESeq2	LRT	glmGamPoi	scranSumFactors
Got1	3dpi	-0.862502		973.535	4.8314e-07	1.35885e-05	-5.03289	-4.35041	89.6291	pseudobulk	DESeq2	LRT	glmGamPoi	scranSumFactors
Sox8	3dpi	-1.08622		373.361	4.83602e-07	1.35885e-05	-5.03271	-4.35041	89.6135	pseudobulk	DESeq2	LRT	glmGamPoi	scranSumFactors
Supt4a	3dpi	-1.09378		272.545	4.8428e-07	1.35894e-05	-5.03244	-4.35039	89.5908	pseudobulk	DESeq2	LRT	glmGamPoi	scranSumFactors
Mgst3	3dpi	-1.1978		522.185	4.85194e-07	1.3597e-05	-5.03208	-4.35027	89.5602	pseudobulk	DESeq2	LRT	glmGamPoi	scranSumFactors
Ndufv2	3dpi	-0.689208		1139.29	4.85893e-07	1.35986e-05	-5.0318	-4.35024	89.5368	pseudobulk	DESeq2	LRT	glmGamPoi	scranSumFactors
Pyurf	3dpi	-1.41763		116.404	4.8921e-07	1.36661e-05	-5.0305	-4.34916	89.4264	pseudobulk	DESeq2	LRT	glmGamPoi	scranSumFactors
Gm15500	3dpi	-1.21345		251.947	4.89599e-07	1.36661e-05	-5.03034	-4.34916	89.4134	pseudobulk	DESeq2	LRT	glmGamPoi	scranSumFactors
Tuba1a	3dpi	-1.41709		1594.38	4.92576e-07	1.3731e-05	-5.02918	-4.34812	89.3152	pseudobulk	DESeq2	LRT	glmGamPoi	scranSumFactors
Glrx5	3dpi	-1.10296		361.996	4.93419e-07	1.37364e-05	-5.02885	-4.34803	89.2875	pseudobulk	DESeq2	LRT	glmGamPoi	scranSumFactors
Uqcrc1	3dpi	-0.594139		798.21	4.97684e-07	1.38369e-05	-5.0272	-4.34643	89.1482	pseudobulk	DESeq2	LRT	glmGamPoi	scranSumFactors
Eif1b	3dpi	-1.15561		913.05	5.01948e-07	1.39371e-05	-5.02557	-4.34485	89.0102	pseudobulk	DESeq2	LRT	glmGamPoi	scranSumFactors
Vapa	3dpi	-0.66138		1573	5.08075e-07	1.40887e-05	-5.02324	-4.34247	88.8144	pseudobulk	DESeq2	LRT	glmGamPoi	scranSumFactors
Tubb4b	3dpi	-1.43499		1076.1	5.09709e-07	1.41124e-05	-5.02262	-4.34211	88.7627	pseudobulk	DESeq2	LRT	glmGamPoi	scranSumFactors
Dicer1	3dpi	0.479597		1106.24	5.10264e-07	1.41124e-05	5.02241	4.34211	88.7451	pseudobulk	DESeq2	LRT	glmGamPoi	scranSumFactors
Tprgl	3dpi	-1.13393		488.045	5.1255e-07	1.41571e-05	-5.02155	-4.34141	88.6731	pseudobulk	DESeq2	LRT	glmGamPoi	scranSumFactors
F3	3dpi	-1.83168		717.937	5.15645e-07	1.42181e-05	-5.0204	-4.34047	88.5762	pseudobulk	DESeq2	LRT	glmGamPoi	scranSumFactors
Scoc	3dpi	-0.984103		763.652	5.16782e-07	1.42181e-05	-5.01998	-4.34047	88.5408	pseudobulk	DESeq2	LRT	glmGamPoi	scranSumFactors
Llph	3dpi	-1.17542		238.826	5.17022e-07	1.42181e-05	-5.01989	-4.34047	88.5333	pseudobulk	DESeq2	LRT	glmGamPoi	scranSumFactors
Myorg	3dpi	-1.57604		55.5324	5.1745e-07	1.42181e-05	-5.01973	-4.34047	88.5201	pseudobulk	DESeq2	LRT	glmGamPoi	scranSumFactors
ENSMUSG00000110741	3dpi	-0.744127		796.6	5.21734e-07	1.43172e-05	-5.01814	-4.33894	88.3876	pseudobulk	DESeq2	LRT	glmGamPoi	scranSumFactors
Arpc5	3dpi	-0.724019		426.774	5.23359e-07	1.43432e-05	-5.01755	-4.33854	88.3377	pseudobulk	DESeq2	LRT	glmGamPoi	scranSumFactors
Ube2e3	3dpi	-0.565146		951.1	5.24477e-07	1.43552e-05	-5.01714	-4.33836	88.3034	pseudobulk	DESeq2	LRT	glmGamPoi	scranSumFactors
Ramac	3dpi	-1.221		394.037	5.25381e-07	1.43613e-05	-5.0168	-4.33826	88.2758	pseudobulk	DESeq2	LRT	glmGamPoi	scranSumFactors
Smim15	3dpi	-1.27681		124.039	5.2637e-07	1.43621e-05	-5.01644	-4.33825	88.2457	pseudobulk	DESeq2	LRT	glmGamPoi	scranSumFactors
Ramp1	3dpi	-1.60055		397.842	5.26768e-07	1.43621e-05	-5.0163	-4.33825	88.2335	pseudobulk	DESeq2	LRT	glmGamPoi	scranSumFactors
Klhl9	3dpi	-1.03207		304.27	5.2994e-07	1.44198e-05	-5.01514	-4.33737	88.1374	pseudobulk	DESeq2	LRT	glmGamPoi	scranSumFactors
Mrpl51	3dpi	-1.0165		343.612	5.30251e-07	1.44198e-05	-5.01503	-4.33737	88.128	pseudobulk	DESeq2	LRT	glmGamPoi	scranSumFactors
Speer6-ps1	3dpi	-1.54585		91.6799	5.34274e-07	1.45105e-05	-5.01358	-4.33599	88.007	pseudobulk	DESeq2	LRT	glmGamPoi	scranSumFactors
ENSMUSG00000107478	3dpi	-0.731718		652.117	5.35562e-07	1.45269e-05	-5.01311	-4.33574	87.9685	pseudobulk	DESeq2	LRT	glmGamPoi	scranSumFactors
Rps2	3dpi	-1.27139		1686.75	5.42176e-07	1.46874e-05	-5.01075	-4.33332	87.7725	pseudobulk	DESeq2	LRT	glmGamPoi	scranSumFactors
Anapc13	3dpi	-1.4121		220.839	5.44759e-07	1.47267e-05	-5.00984	-4.33274	87.6967	pseudobulk	DESeq2	LRT	glmGamPoi	scranSumFactors
Ppp1ca	3dpi	-1.00106		396.347	5.45022e-07	1.47267e-05	-5.00974	-4.33274	87.689	pseudobulk	DESeq2	LRT	glmGamPoi	scranSumFactors
Mrpl13	3dpi	-0.750008		294.548	5.48623e-07	1.47903e-05	-5.00848	-4.33179	87.584	pseudobulk	DESeq2	LRT	glmGamPoi	scranSumFactors
Mdh1	3dpi	-1.13861		2762.3	5.48774e-07	1.47903e-05	-5.00842	-4.33179	87.5796	pseudobulk	DESeq2	LRT	glmGamPoi	scranSumFactors
ENSMUSG00000105255	3dpi	-1.31256		308.494	5.56307e-07	1.49742e-05	-5.0058	-4.32907	87.3628	pseudobulk	DESeq2	LRT	glmGamPoi	scranSumFactors
Ufc1	3dpi	-0.595928		469.75	5.60244e-07	1.5061e-05	-5.00444	-4.32779	87.2508	pseudobulk	DESeq2	LRT	glmGamPoi	scranSumFactors
Sf3b5	3dpi	-1.37857		326.838	5.62116e-07	1.50921e-05	-5.0038	-4.32734	87.1979	pseudobulk	DESeq2	LRT	glmGamPoi	scranSumFactors
Stmn3	3dpi	-1.01544		4711.35	5.64601e-07	1.51396e-05	-5.00295	-4.32665	87.1279	pseudobulk	DESeq2	LRT	glmGamPoi	scranSumFactors
Dnajb9	3dpi	-1.03625		299.474	5.67321e-07	1.51933e-05	-5.00202	-4.32587	87.0518	pseudobulk	DESeq2	LRT	glmGamPoi	scranSumFactors
Tmem108	3dpi	0.459993		3520.58	5.71456e-07	1.52846e-05	5.00062	4.32455	86.9368	pseudobulk	DESeq2	LRT	glmGamPoi	scranSumFactors
Anapc11	3dpi	-0.941514		435.99	5.72682e-07	1.52891e-05	-5.00021	-4.32448	86.9029	pseudobulk	DESeq2	LRT	glmGamPoi	scranSumFactors
Gclm	3dpi	-0.602075		984.824	5.73071e-07	1.52891e-05	-5.00008	-4.32448	86.8922	pseudobulk	DESeq2	LRT	glmGamPoi	scranSumFactors
Unc79	3dpi	0.502231		3898.54	5.76981e-07	1.5374e-05	4.99877	4.32326	86.7847	pseudobulk	DESeq2	LRT	glmGamPoi	scranSumFactors
2310010J17Rik	3dpi	-1.49574		64.1548	5.81072e-07	1.54635e-05	-4.9974	-4.32198	86.6731	pseudobulk	DESeq2	LRT	glmGamPoi	scranSumFactors
Pdap1	3dpi	-0.887439		361.946	5.84487e-07	1.55348e-05	-4.99627	-4.32096	86.5807	pseudobulk	DESeq2	LRT	glmGamPoi	scranSumFactors
Nudt19	3dpi	-0.900794		193.449	5.85826e-07	1.55397e-05	-4.99583	-4.3209	86.5446	pseudobulk	DESeq2	LRT	glmGamPoi	scranSumFactors
Gtf2h5	3dpi	-0.67287		826.242	5.86975e-07	1.55397e-05	-4.99545	-4.3209	86.5138	pseudobulk	DESeq2	LRT	glmGamPoi	scranSumFactors
Pcbp1	3dpi	-1.27081		415.945	5.87535e-07	1.55397e-05	-4.99527	-4.3209	86.4987	pseudobulk	DESeq2	LRT	glmGamPoi	scranSumFactors
Lamtor1	3dpi	-0.793163		384.602	5.87611e-07	1.55397e-05	-4.99525	-4.3209	86.4967	pseudobulk	DESeq2	LRT	glmGamPoi	scranSumFactors
Atp6v1g2	3dpi	-0.907965		592.035	5.88748e-07	1.55503e-05	-4.99487	-4.32075	86.4663	pseudobulk	DESeq2	LRT	glmGamPoi	scranSumFactors
Pde10a	3dpi	0.668653		5833.64	5.90585e-07	1.55744e-05	4.99427	4.3204	86.4172	pseudobulk	DESeq2	LRT	glmGamPoi	scranSumFactors
ENSMUSG00000108112	3dpi	-0.770784		351.722	5.91133e-07	1.55744e-05	-4.99409	-4.3204	86.4026	pseudobulk	DESeq2	LRT	glmGamPoi	scranSumFactors
Yif1a	3dpi	-1.15164		162.266	5.91874e-07	1.55745e-05	-4.99385	-4.3204	86.3829	pseudobulk	DESeq2	LRT	glmGamPoi	scranSumFactors
Vps29	3dpi	-0.765464		949.796	5.95135e-07	1.56408e-05	-4.99279	-4.31946	86.2965	pseudobulk	DESeq2	LRT	glmGamPoi	scranSumFactors
Smim19	3dpi	-1.02539		682.963	5.9755e-07	1.56848e-05	-4.99201	-4.31885	86.2329	pseudobulk	DESeq2	LRT	glmGamPoi	scranSumFactors
Clec16a	3dpi	0.415552		1332.96	5.98328e-07	1.56857e-05	4.99176	4.31883	86.2125	pseudobulk	DESeq2	LRT	glmGamPoi	scranSumFactors
Ugp2	3dpi	-0.647497		698.256	5.99154e-07	1.56879e-05	-4.99149	-4.3188	86.1908	pseudobulk	DESeq2	LRT	glmGamPoi	scranSumFactors
Tspan3	3dpi	-0.942936		2017.79	6.08181e-07	1.59045e-05	-4.9886	-4.31577	85.9563	pseudobulk	DESeq2	LRT	glmGamPoi	scranSumFactors
Gcsh	3dpi	-1.1646		231.053	6.11318e-07	1.59668e-05	-4.98761	-4.31491	85.8757	pseudobulk	DESeq2	LRT	glmGamPoi	scranSumFactors
Aph1a	3dpi	-0.559469		471.155	6.14044e-07	1.60182e-05	-4.98675	-4.3142	85.8061	pseudobulk	DESeq2	LRT	glmGamPoi	scranSumFactors
Cmpk1	3dpi	-0.713249		605.609	6.15286e-07	1.60308e-05	-4.98636	-4.31403	85.7745	pseudobulk	DESeq2	LRT	glmGamPoi	scranSumFactors
Tuba1b	3dpi	-1.47037		1767.6	6.17655e-07	1.60727e-05	-4.98561	-4.31345	85.7145	pseudobulk	DESeq2	LRT	glmGamPoi	scranSumFactors
Tmem238	3dpi	-1.12937		99.4149	6.20512e-07	1.61272e-05	-4.98472	-4.3127	85.6424	pseudobulk	DESeq2	LRT	glmGamPoi	scranSumFactors
Bex3	3dpi	-1.40148		1577.02	6.21456e-07	1.61319e-05	-4.98443	-4.31264	85.6187	pseudobulk	DESeq2	LRT	glmGamPoi	scranSumFactors
Kcnh1	3dpi	0.711572		873.532	6.24283e-07	1.61854e-05	4.98355	4.31191	85.5478	pseudobulk	DESeq2	LRT	glmGamPoi	scranSumFactors
Abhd3	3dpi	-0.881273		581.732	6.38351e-07	1.65211e-05	-4.97924	-4.30737	85.2009	pseudobulk	DESeq2	LRT	glmGamPoi	scranSumFactors
Fzd2	3dpi	-1.90541		126.651	6.38794e-07	1.65211e-05	-4.9791	-4.30737	85.1901	pseudobulk	DESeq2	LRT	glmGamPoi	scranSumFactors
Trmt10a	3dpi	-0.811117		193.384	6.39916e-07	1.65299e-05	-4.97876	-4.30725	85.1628	pseudobulk	DESeq2	LRT	glmGamPoi	scranSumFactors
Spc24	3dpi	-1.29826		86.4308	6.42818e-07	1.65845e-05	-4.97789	-4.30652	85.0925	pseudobulk	DESeq2	LRT	glmGamPoi	scranSumFactors
Hnrnph2	3dpi	-0.747647		564.531	6.44711e-07	1.65981e-05	-4.97732	-4.30634	85.0469	pseudobulk	DESeq2	LRT	glmGamPoi	scranSumFactors
Tbca	3dpi	-0.829202		916.191	6.44915e-07	1.65981e-05	-4.97726	-4.30634	85.042	pseudobulk	DESeq2	LRT	glmGamPoi	scranSumFactors
Hmox2	3dpi	-0.529329		823.65	6.5044e-07	1.67059e-05	-4.97561	-4.3049	84.9097	pseudobulk	DESeq2	LRT	glmGamPoi	scranSumFactors
Agt	3dpi	-2.04355		851.247	6.50685e-07	1.67059e-05	-4.97553	-4.3049	84.9039	pseudobulk	DESeq2	LRT	glmGamPoi	scranSumFactors
BC029722	3dpi	-1.01419		255.551	6.56442e-07	1.68263e-05	-4.97383	-4.30331	84.7675	pseudobulk	DESeq2	LRT	glmGamPoi	scranSumFactors
Efcab8	3dpi	-1.0125		280.649	6.57456e-07	1.68263e-05	-4.97353	-4.30331	84.7436	pseudobulk	DESeq2	LRT	glmGamPoi	scranSumFactors
Rnasek	3dpi	-1.30812		963.318	6.57763e-07	1.68263e-05	-4.97344	-4.30331	84.7364	pseudobulk	DESeq2	LRT	glmGamPoi	scranSumFactors
Rras	3dpi	-1.68285		37.2381	6.58697e-07	1.68298e-05	-4.97316	-4.30327	84.7145	pseudobulk	DESeq2	LRT	glmGamPoi	scranSumFactors
Map1lc3a	3dpi	-1.36742		1053.14	6.60879e-07	1.68652e-05	-4.97252	-4.3028	84.6633	pseudobulk	DESeq2	LRT	glmGamPoi	scranSumFactors
Med31	3dpi	-0.850238		372.853	6.64596e-07	1.69396e-05	-4.97143	-4.30183	84.5767	pseudobulk	DESeq2	LRT	glmGamPoi	scranSumFactors
Ctif	3dpi	0.690748		1799.04	6.76213e-07	1.72149e-05	4.96807	4.29825	84.3095	pseudobulk	DESeq2	LRT	glmGamPoi	scranSumFactors
Prelid1	3dpi	-1.4058		299.218	6.78144e-07	1.72433e-05	-4.96752	-4.29789	84.2656	pseudobulk	DESeq2	LRT	glmGamPoi	scranSumFactors
Aip	3dpi	-1.16556		254.416	6.80325e-07	1.72501e-05	-4.9669	-4.2978	84.2162	pseudobulk	DESeq2	LRT	glmGamPoi	scranSumFactors
ENSMUSG00000113105	3dpi	-1.13367		105.065	6.80509e-07	1.72501e-05	-4.96685	-4.2978	84.212	pseudobulk	DESeq2	LRT	glmGamPoi	scranSumFactors
Zfp36l1	3dpi	-1.73912		166.184	6.80859e-07	1.72501e-05	-4.96675	-4.2978	84.2041	pseudobulk	DESeq2	LRT	glmGamPoi	scranSumFactors
Rims1	3dpi	0.530997		11605.3	6.839e-07	1.73063e-05	4.96588	4.29708	84.1356	pseudobulk	DESeq2	LRT	glmGamPoi	scranSumFactors
Unc80	3dpi	0.428536		5323.82	6.84753e-07	1.73072e-05	4.96564	4.29707	84.1164	pseudobulk	DESeq2	LRT	glmGamPoi	scranSumFactors
Lsm6	3dpi	-0.893557		361.679	6.90682e-07	1.74362e-05	-4.96397	-4.29542	83.984	pseudobulk	DESeq2	LRT	glmGamPoi	scranSumFactors
Matn4	3dpi	-1.29952		255.67	6.96821e-07	1.75702e-05	-4.96225	-4.29372	83.8483	pseudobulk	DESeq2	LRT	glmGamPoi	scranSumFactors
Ccdc124	3dpi	-1.26021		273.955	7.00109e-07	1.76097e-05	-4.96133	-4.29322	83.7762	pseudobulk	DESeq2	LRT	glmGamPoi	scranSumFactors
Fundc2	3dpi	-1.16825		222.03	7.00571e-07	1.76097e-05	-4.96121	-4.29322	83.7661	pseudobulk	DESeq2	LRT	glmGamPoi	scranSumFactors
Rps27l	3dpi	-1.24214		171.512	7.00887e-07	1.76097e-05	-4.96112	-4.29322	83.7592	pseudobulk	DESeq2	LRT	glmGamPoi	scranSumFactors
Pigp	3dpi	-0.752245		540.108	7.0267e-07	1.76335e-05	-4.96062	-4.29292	83.7203	pseudobulk	DESeq2	LRT	glmGamPoi	scranSumFactors
C1qa	3dpi	-2.28786		89.22	7.04466e-07	1.76576e-05	-4.96013	-4.29262	83.6813	pseudobulk	DESeq2	LRT	glmGamPoi	scranSumFactors
Shank3	3dpi	0.674234		1126.51	7.06726e-07	1.76814e-05	4.95951	4.29232	83.6323	pseudobulk	DESeq2	LRT	glmGamPoi	scranSumFactors
Ubc	3dpi	-1.338		1765.08	7.0709e-07	1.76814e-05	-4.95941	-4.29232	83.6244	pseudobulk	DESeq2	LRT	glmGamPoi	scranSumFactors
Glul	3dpi	-1.26041		1181.47	7.11669e-07	1.77749e-05	-4.95815	-4.29115	83.5258	pseudobulk	DESeq2	LRT	glmGamPoi	scranSumFactors
Gstt1	3dpi	-1.03621		133.857	7.15289e-07	1.784e-05	-4.95717	-4.29034	83.4483	pseudobulk	DESeq2	LRT	glmGamPoi	scranSumFactors
Ebp	3dpi	-1.19562		199.067	7.15964e-07	1.784e-05	-4.95698	-4.29034	83.4339	pseudobulk	DESeq2	LRT	glmGamPoi	scranSumFactors
Sncg	3dpi	-1.89326		122.205	7.17679e-07	1.78617e-05	-4.95652	-4.29007	83.3974	pseudobulk	DESeq2	LRT	glmGamPoi	scranSumFactors
Insig1	3dpi	-0.899088		642.68	7.19107e-07	1.78762e-05	-4.95613	-4.28989	83.3671	pseudobulk	DESeq2	LRT	glmGamPoi	scranSumFactors
Cib1	3dpi	-1.3976		55.5503	7.20342e-07	1.78857e-05	-4.9558	-4.28977	83.341	pseudobulk	DESeq2	LRT	glmGamPoi	scranSumFactors
Atp8a2	3dpi	0.549237		3464.34	7.21183e-07	1.78857e-05	4.95557	4.28977	83.3232	pseudobulk	DESeq2	LRT	glmGamPoi	scranSumFactors
Ppp1r13b	3dpi	0.471815		1514.77	7.22895e-07	1.79071e-05	4.95511	4.28951	83.287	pseudobulk	DESeq2	LRT	glmGamPoi	scranSumFactors
Fcgrt	3dpi	-2.7		53.3542	7.23866e-07	1.79102e-05	-4.95485	-4.28947	83.2666	pseudobulk	DESeq2	LRT	glmGamPoi	scranSumFactors
Trio	3dpi	0.502872		3779.65	7.30889e-07	1.80628e-05	4.95297	4.28758	83.1197	pseudobulk	DESeq2	LRT	glmGamPoi	scranSumFactors
Ndufs8	3dpi	-1.51832		356.84	7.33933e-07	1.81001e-05	-4.95216	-4.28712	83.0565	pseudobulk	DESeq2	LRT	glmGamPoi	scranSumFactors
Npm1	3dpi	-1.00682		945.86	7.34114e-07	1.81001e-05	-4.95211	-4.28712	83.0527	pseudobulk	DESeq2	LRT	glmGamPoi	scranSumFactors
Arf1	3dpi	-0.899619		918.548	7.35507e-07	1.81134e-05	-4.95175	-4.28696	83.0239	pseudobulk	DESeq2	LRT	glmGamPoi	scranSumFactors
Cx3cr1	3dpi	-0.628204		316.971	7.36931e-07	1.81232e-05	-4.95137	-4.28684	82.9945	pseudobulk	DESeq2	LRT	glmGamPoi	scranSumFactors
Phlda3	3dpi	-1.44305		279.329	7.37623e-07	1.81232e-05	-4.95119	-4.28684	82.9803	pseudobulk	DESeq2	LRT	glmGamPoi	scranSumFactors
Qdpr	3dpi	-1.2976		822	7.45597e-07	1.82979e-05	-4.94909	-4.28471	82.8172	pseudobulk	DESeq2	LRT	glmGamPoi	scranSumFactors
Ier5	3dpi	-1.15017		81.8206	7.49353e-07	1.83687e-05	-4.94812	-4.28385	82.741	pseudobulk	DESeq2	LRT	glmGamPoi	scranSumFactors
Nudt9	3dpi	-0.936031		302.884	7.58359e-07	1.85679e-05	-4.94579	-4.28145	82.5603	pseudobulk	DESeq2	LRT	glmGamPoi	scranSumFactors
4930431F10Rik	3dpi	-2.56674		26.2322	7.62083e-07	1.86346e-05	-4.94484	-4.28065	82.4862	pseudobulk	DESeq2	LRT	glmGamPoi	scranSumFactors
Elof1	3dpi	-1.06005		262.332	7.62847e-07	1.86346e-05	-4.94464	-4.28065	82.4711	pseudobulk	DESeq2	LRT	glmGamPoi	scranSumFactors
Rab5if	3dpi	-0.799805		502.039	7.69933e-07	1.8786e-05	-4.94284	-4.27885	82.3316	pseudobulk	DESeq2	LRT	glmGamPoi	scranSumFactors
Tcn2	3dpi	-1.25234		77.8798	7.7397e-07	1.88627e-05	-4.94182	-4.27794	82.2527	pseudobulk	DESeq2	LRT	glmGamPoi	scranSumFactors
Ccdc80	3dpi	-1.54917		42.7469	7.7879e-07	1.89444e-05	-4.94061	-4.27698	82.1592	pseudobulk	DESeq2	LRT	glmGamPoi	scranSumFactors
Cacybp	3dpi	-1.18269		659.313	7.79115e-07	1.89444e-05	-4.94053	-4.27698	82.153	pseudobulk	DESeq2	LRT	glmGamPoi	scranSumFactors
COX3	3dpi	-1.25883		426.799	7.84131e-07	1.90445e-05	-4.93928	-4.27581	82.0564	pseudobulk	DESeq2	LRT	glmGamPoi	scranSumFactors
Gadd45gip1	3dpi	-1.2732		378.319	7.85678e-07	1.90601e-05	-4.93889	-4.27563	82.0268	pseudobulk	DESeq2	LRT	glmGamPoi	scranSumFactors
ENSMUSG00000086364	3dpi	-1.02308		119.555	7.90517e-07	1.91365e-05	-4.93769	-4.27473	81.9345	pseudobulk	DESeq2	LRT	glmGamPoi	scranSumFactors
Rimbp2	3dpi	0.70488		2070.88	7.91011e-07	1.91365e-05	4.93757	4.27473	81.9252	pseudobulk	DESeq2	LRT	glmGamPoi	scranSumFactors
Cdc14b	3dpi	0.406589		1309.01	7.91544e-07	1.91365e-05	4.93744	4.27473	81.915	pseudobulk	DESeq2	LRT	glmGamPoi	scranSumFactors
Adh5	3dpi	-0.967078		218.563	7.98967e-07	1.92739e-05	-4.93562	-4.27314	81.775	pseudobulk	DESeq2	LRT	glmGamPoi	scranSumFactors
Fkbp2	3dpi	-1.0876		1428.95	7.99049e-07	1.92739e-05	-4.9356	-4.27314	81.7735	pseudobulk	DESeq2	LRT	glmGamPoi	scranSumFactors
Nmnat2	3dpi	0.467822		3115.31	8.02069e-07	1.93246e-05	4.93486	4.27255	81.7169	pseudobulk	DESeq2	LRT	glmGamPoi	scranSumFactors
Bcas3os1	3dpi	-0.98305		247.715	8.10395e-07	1.9486e-05	-4.93285	-4.2707	81.5623	pseudobulk	DESeq2	LRT	glmGamPoi	scranSumFactors
Pigyl	3dpi	-1.37542		285.761	8.10609e-07	1.9486e-05	-4.9328	-4.2707	81.5584	pseudobulk	DESeq2	LRT	glmGamPoi	scranSumFactors
Hepacam	3dpi	-1.02864		911.027	8.19006e-07	1.96655e-05	-4.93078	-4.26866	81.4044	pseudobulk	DESeq2	LRT	glmGamPoi	scranSumFactors
Banf1	3dpi	-1.39764		143.932	8.23774e-07	1.97575e-05	-4.92965	-4.26761	81.3178	pseudobulk	DESeq2	LRT	glmGamPoi	scranSumFactors
Jazf1	3dpi	0.656141		2807.27	8.24842e-07	1.97598e-05	4.9294	4.26759	81.2984	pseudobulk	DESeq2	LRT	glmGamPoi	scranSumFactors
Tob1	3dpi	-0.826847		389.198	8.2574e-07	1.97598e-05	-4.92918	-4.26759	81.2822	pseudobulk	DESeq2	LRT	glmGamPoi	scranSumFactors
Aak1	3dpi	0.453238		4001.25	8.30224e-07	1.98446e-05	4.92813	4.26663	81.2015	pseudobulk	DESeq2	LRT	glmGamPoi	scranSumFactors
Gm9803	3dpi	-1.50486		167.763	8.37191e-07	1.99885e-05	-4.92649	-4.26502	81.0771	pseudobulk	DESeq2	LRT	glmGamPoi	scranSumFactors
Mtus2	3dpi	0.573885		2331.52	8.38752e-07	2.00032e-05	4.92613	4.26486	81.0494	pseudobulk	DESeq2	LRT	glmGamPoi	scranSumFactors
Rida	3dpi	-0.876227		178.336	8.40522e-07	2.00134e-05	-4.92572	-4.26474	81.018	pseudobulk	DESeq2	LRT	glmGamPoi	scranSumFactors
Zfp428	3dpi	-1.2952		222.122	8.41075e-07	2.00134e-05	-4.92559	-4.26474	81.0083	pseudobulk	DESeq2	LRT	glmGamPoi	scranSumFactors
Psmb10	3dpi	-1.15221		244.64	8.42215e-07	2.0018e-05	-4.92532	-4.26469	80.9881	pseudobulk	DESeq2	LRT	glmGamPoi	scranSumFactors
Mrpl28	3dpi	-1.07132		276.374	8.45252e-07	2.00676e-05	-4.92462	-4.26414	80.9346	pseudobulk	DESeq2	LRT	glmGamPoi	scranSumFactors
Ppp1r11	3dpi	-1.05746		561.833	8.47653e-07	2.0102e-05	-4.92406	-4.26375	80.8925	pseudobulk	DESeq2	LRT	glmGamPoi	scranSumFactors
Tmem147	3dpi	-1.12279		886.432	8.50039e-07	2.0136e-05	-4.92351	-4.26338	80.8508	pseudobulk	DESeq2	LRT	glmGamPoi	scranSumFactors
Cdkn2d	3dpi	-1.24219		254.345	8.56603e-07	2.02535e-05	-4.92201	-4.26208	80.7367	pseudobulk	DESeq2	LRT	glmGamPoi	scranSumFactors
Mtln	3dpi	-0.828696		365.928	8.57173e-07	2.02535e-05	-4.92188	-4.26208	80.7268	pseudobulk	DESeq2	LRT	glmGamPoi	scranSumFactors
Txn2	3dpi	-0.775512		398.709	8.57874e-07	2.02535e-05	-4.92172	-4.26208	80.7147	pseudobulk	DESeq2	LRT	glmGamPoi	scranSumFactors
Acot1	3dpi	-1.35098		57.5765	8.61127e-07	2.03076e-05	-4.92098	-4.26148	80.6586	pseudobulk	DESeq2	LRT	glmGamPoi	scranSumFactors
Safb2	3dpi	0.511616		990.42	8.66548e-07	2.04127e-05	4.91975	4.26033	80.5657	pseudobulk	DESeq2	LRT	glmGamPoi	scranSumFactors
Slc7a10	3dpi	-1.85899		611.879	8.73857e-07	2.05455e-05	-4.91811	-4.25888	80.4415	pseudobulk	DESeq2	LRT	glmGamPoi	scranSumFactors
Bhlhe40	3dpi	-0.759019		196.049	8.74134e-07	2.05455e-05	-4.91804	-4.25888	80.4369	pseudobulk	DESeq2	LRT	glmGamPoi	scranSumFactors
Hey1	3dpi	-1.17784		72.9668	8.89295e-07	2.08787e-05	-4.91468	-4.25528	80.1831	pseudobulk	DESeq2	LRT	glmGamPoi	scranSumFactors
Tmed10	3dpi	-0.616395		1252.18	8.90593e-07	2.08859e-05	-4.91439	-4.2552	80.1617	pseudobulk	DESeq2	LRT	glmGamPoi	scranSumFactors
Psma7	3dpi	-0.99474		874.733	8.91767e-07	2.08903e-05	-4.91413	-4.25516	80.1423	pseudobulk	DESeq2	LRT	glmGamPoi	scranSumFactors
Xpo6	3dpi	0.447276		1010.36	8.97214e-07	2.09749e-05	4.91294	4.25425	80.0526	pseudobulk	DESeq2	LRT	glmGamPoi	scranSumFactors
Jakmip3	3dpi	0.43071		1157.29	8.9797e-07	2.09749e-05	4.91277	4.25425	80.0402	pseudobulk	DESeq2	LRT	glmGamPoi	scranSumFactors
Apex1	3dpi	-1.2301		180.477	8.98359e-07	2.09749e-05	-4.91269	-4.25425	80.0339	pseudobulk	DESeq2	LRT	glmGamPoi	scranSumFactors
Atp6v0e2	3dpi	-0.934513		823.874	8.99417e-07	2.09765e-05	-4.91246	-4.25424	80.0165	pseudobulk	DESeq2	LRT	glmGamPoi	scranSumFactors
Slc8b1	3dpi	-1.54152		55.7705	9.01621e-07	2.10047e-05	-4.91198	-4.25393	79.9805	pseudobulk	DESeq2	LRT	glmGamPoi	scranSumFactors
COX2	3dpi	-1.40835		272.735	9.09795e-07	2.11718e-05	-4.91021	-4.25216	79.848	pseudobulk	DESeq2	LRT	glmGamPoi	scranSumFactors
Commd1	3dpi	-0.77091		238.633	9.1355e-07	2.12358e-05	-4.9094	-4.25148	79.7875	pseudobulk	DESeq2	LRT	glmGamPoi	scranSumFactors
Hsbp1	3dpi	-1.09778		736.788	9.19266e-07	2.13452e-05	-4.90818	-4.25033	79.696	pseudobulk	DESeq2	LRT	glmGamPoi	scranSumFactors
Reep5	3dpi	-0.635335		1716.1	9.21767e-07	2.13638e-05	-4.90764	-4.25014	79.6562	pseudobulk	DESeq2	LRT	glmGamPoi	scranSumFactors
Dchs2	3dpi	0.646322		551.447	9.22112e-07	2.13638e-05	4.90757	4.25014	79.6508	pseudobulk	DESeq2	LRT	glmGamPoi	scranSumFactors
ENSMUSG00000102070	3dpi	-1.33979		251.688	9.23103e-07	2.13638e-05	-4.90736	-4.25014	79.635	pseudobulk	DESeq2	LRT	glmGamPoi	scranSumFactors
Pmp22	3dpi	-1.57376		213.355	9.2546e-07	2.13949e-05	-4.90686	-4.24981	79.5977	pseudobulk	DESeq2	LRT	glmGamPoi	scranSumFactors
Prxl2b	3dpi	-1.07702		294.031	9.29285e-07	2.14599e-05	-4.90605	-4.24913	79.5373	pseudobulk	DESeq2	LRT	glmGamPoi	scranSumFactors
ENSMUSG00000112237	3dpi	-1.03844		96.006	9.31931e-07	2.14975e-05	-4.90549	-4.24874	79.4957	pseudobulk	DESeq2	LRT	glmGamPoi	scranSumFactors
ENSMUSG00000101111	3dpi	-1.23267		421.385	9.36988e-07	2.15906e-05	-4.90443	-4.24777	79.4166	pseudobulk	DESeq2	LRT	glmGamPoi	scranSumFactors
COX1	3dpi	-1.41027		554.574	9.3813e-07	2.15933e-05	-4.90419	-4.24774	79.3988	pseudobulk	DESeq2	LRT	glmGamPoi	scranSumFactors
Trappc6b	3dpi	-0.63028		869.768	9.48272e-07	2.1803e-05	-4.90208	-4.24558	79.2419	pseudobulk	DESeq2	LRT	glmGamPoi	scranSumFactors
Calca	3dpi	-1.91631		94.9737	9.51061e-07	2.18434e-05	-4.9015	-4.24516	79.1991	pseudobulk	DESeq2	LRT	glmGamPoi	scranSumFactors
Bola3	3dpi	-0.856804		258.487	9.53029e-07	2.18648e-05	-4.9011	-4.24494	79.1689	pseudobulk	DESeq2	LRT	glmGamPoi	scranSumFactors
Arhgap26	3dpi	0.53589		2647.01	9.6364e-07	2.20616e-05	4.89892	4.24293	79.0078	pseudobulk	DESeq2	LRT	glmGamPoi	scranSumFactors
Serpine2	3dpi	-0.997433		1246.83	9.64593e-07	2.20616e-05	-4.89873	-4.24293	78.9934	pseudobulk	DESeq2	LRT	glmGamPoi	scranSumFactors
Ccdc85b	3dpi	-1.04734		621.857	9.64739e-07	2.20616e-05	-4.8987	-4.24293	78.9912	pseudobulk	DESeq2	LRT	glmGamPoi	scranSumFactors
Sco2	3dpi	-1.39264		169.885	9.67055e-07	2.20671e-05	-4.89823	-4.24288	78.9563	pseudobulk	DESeq2	LRT	glmGamPoi	scranSumFactors
Lncpint	3dpi	0.498492		7710.47	9.67662e-07	2.20671e-05	4.8981	4.24288	78.9472	pseudobulk	DESeq2	LRT	glmGamPoi	scranSumFactors
Gm10275	3dpi	-1.27806		223.914	9.68754e-07	2.20671e-05	-4.89788	-4.24288	78.9308	pseudobulk	DESeq2	LRT	glmGamPoi	scranSumFactors
Htra2	3dpi	-0.65998		372.573	9.69229e-07	2.20671e-05	-4.89779	-4.24288	78.9237	pseudobulk	DESeq2	LRT	glmGamPoi	scranSumFactors
Pgls	3dpi	-0.855906		301.822	9.70202e-07	2.20671e-05	-4.89759	-4.24288	78.9091	pseudobulk	DESeq2	LRT	glmGamPoi	scranSumFactors
Ccdc190	3dpi	-2.16252		105.478	9.78249e-07	2.22262e-05	-4.89596	-4.24127	78.7892	pseudobulk	DESeq2	LRT	glmGamPoi	scranSumFactors
Ndufa9	3dpi	-0.751097		399.437	9.80147e-07	2.22454e-05	-4.89558	-4.24107	78.761	pseudobulk	DESeq2	LRT	glmGamPoi	scranSumFactors
Atxn7l1	3dpi	0.565486		1702.79	9.81772e-07	2.22584e-05	4.89526	4.24094	78.737	pseudobulk	DESeq2	LRT	glmGamPoi	scranSumFactors
Cox14	3dpi	-1.04083		506.28	9.90147e-07	2.24242e-05	-4.89359	-4.23928	78.6139	pseudobulk	DESeq2	LRT	glmGamPoi	scranSumFactors
Aplp1	3dpi	-0.91304		3140.72	9.96074e-07	2.25343e-05	-4.89241	-4.23818	78.5275	pseudobulk	DESeq2	LRT	glmGamPoi	scranSumFactors
Hmgb2	3dpi	-1.49759		43.7392	9.97342e-07	2.25389e-05	-4.89216	-4.23813	78.5091	pseudobulk	DESeq2	LRT	glmGamPoi	scranSumFactors
Abhd15	3dpi	-0.962579		552.25	1.00176e-06	2.26145e-05	-4.89129	-4.23738	78.4452	pseudobulk	DESeq2	LRT	glmGamPoi	scranSumFactors
Tspan31	3dpi	-1.05622		240.973	1.00544e-06	2.26733e-05	-4.89057	-4.2368	78.3923	pseudobulk	DESeq2	LRT	glmGamPoi	scranSumFactors
Paics	3dpi	-0.748587		280.073	1.01344e-06	2.28295e-05	-4.88901	-4.23525	78.2778	pseudobulk	DESeq2	LRT	glmGamPoi	scranSumFactors
Vwa1	3dpi	-1.06054		145.188	1.01814e-06	2.29108e-05	-4.8881	-4.23445	78.2111	pseudobulk	DESeq2	LRT	glmGamPoi	scranSumFactors
G0s2	3dpi	-1.29145		171.944	1.01978e-06	2.29233e-05	-4.88778	-4.23433	78.1879	pseudobulk	DESeq2	LRT	glmGamPoi	scranSumFactors
Epb41l4b	3dpi	0.629924		1850.43	1.02362e-06	2.29853e-05	4.88704	4.23372	78.1337	pseudobulk	DESeq2	LRT	glmGamPoi	scranSumFactors
Snrpc	3dpi	-0.75308		257.016	1.0272e-06	2.30412e-05	-4.88635	-4.23318	78.0834	pseudobulk	DESeq2	LRT	glmGamPoi	scranSumFactors
Pdxp	3dpi	-1.09724		558.623	1.03177e-06	2.3119e-05	-4.88548	-4.23242	78.0196	pseudobulk	DESeq2	LRT	glmGamPoi	scranSumFactors
Cd302	3dpi	-1.19518		214.989	1.03513e-06	2.31697e-05	-4.88484	-4.23193	77.9729	pseudobulk	DESeq2	LRT	glmGamPoi	scranSumFactors
Lfng	3dpi	-1.92588		136.71	1.03825e-06	2.32107e-05	-4.88425	-4.23153	77.9295	pseudobulk	DESeq2	LRT	glmGamPoi	scranSumFactors
Gnai2	3dpi	-0.785656		714.32	1.03915e-06	2.32107e-05	-4.88408	-4.23153	77.9171	pseudobulk	DESeq2	LRT	glmGamPoi	scranSumFactors
Spink10	3dpi	0.46626		815.132	1.04182e-06	2.32186e-05	4.88357	4.23145	77.8803	pseudobulk	DESeq2	LRT	glmGamPoi	scranSumFactors
Micos10	3dpi	-0.555897		885.135	1.04195e-06	2.32186e-05	-4.88355	-4.23145	77.8784	pseudobulk	DESeq2	LRT	glmGamPoi	scranSumFactors
E130102H24Rik	3dpi	-0.530233		438.941	1.04316e-06	2.32186e-05	-4.88332	-4.23145	77.8618	pseudobulk	DESeq2	LRT	glmGamPoi	scranSumFactors
ENSMUSG00000112089	3dpi	-1.17699		70.4533	1.04477e-06	2.32186e-05	-4.88301	-4.23145	77.8396	pseudobulk	DESeq2	LRT	glmGamPoi	scranSumFactors
ENSMUSG00000089989	3dpi	-0.930346		460.867	1.045e-06	2.32186e-05	-4.88297	-4.23145	77.8365	pseudobulk	DESeq2	LRT	glmGamPoi	scranSumFactors
Bad	3dpi	-0.881406		183.704	1.04832e-06	2.3268e-05	-4.88234	-4.23098	77.7909	pseudobulk	DESeq2	LRT	glmGamPoi	scranSumFactors
Bag5	3dpi	-1.0612		191.669	1.0498e-06	2.32763e-05	-4.88207	-4.2309	77.7707	pseudobulk	DESeq2	LRT	glmGamPoi	scranSumFactors
Eif3h	3dpi	-0.671993		738.764	1.05716e-06	2.34149e-05	-4.88069	-4.22956	77.6705	pseudobulk	DESeq2	LRT	glmGamPoi	scranSumFactors
Tubb5	3dpi	-1.30543		1308.99	1.06091e-06	2.34458e-05	-4.87999	-4.22926	77.6198	pseudobulk	DESeq2	LRT	glmGamPoi	scranSumFactors
Miga1	3dpi	0.500572		1058.45	1.06172e-06	2.34458e-05	4.87984	4.22926	77.6088	pseudobulk	DESeq2	LRT	glmGamPoi	scranSumFactors
Idh3b	3dpi	-0.951894		932.435	1.06188e-06	2.34458e-05	-4.87981	-4.22926	77.6066	pseudobulk	DESeq2	LRT	glmGamPoi	scranSumFactors
ENSMUSG00000114150	3dpi	-1.00938		508.297	1.06476e-06	2.34847e-05	-4.87928	-4.22889	77.5679	pseudobulk	DESeq2	LRT	glmGamPoi	scranSumFactors
Tmem86a	3dpi	-1.13243		84.6486	1.06947e-06	2.3564e-05	-4.87841	-4.22813	77.5048	pseudobulk	DESeq2	LRT	glmGamPoi	scranSumFactors
Iscu	3dpi	-1.02935		935.822	1.07123e-06	2.35781e-05	-4.87808	-4.228	77.4813	pseudobulk	DESeq2	LRT	glmGamPoi	scranSumFactors
Slit1	3dpi	0.809071		955.599	1.07307e-06	2.35941e-05	4.87774	4.22784	77.4568	pseudobulk	DESeq2	LRT	glmGamPoi	scranSumFactors
Rnf208	3dpi	-0.976341		438.576	1.07552e-06	2.3614e-05	-4.87729	-4.22765	77.4242	pseudobulk	DESeq2	LRT	glmGamPoi	scranSumFactors
Lsm8	3dpi	-0.863151		194.518	1.07621e-06	2.3614e-05	-4.87717	-4.22765	77.415	pseudobulk	DESeq2	LRT	glmGamPoi	scranSumFactors
Pcnx2	3dpi	0.460242		1207.09	1.08405e-06	2.37615e-05	4.87573	4.22625	77.3113	pseudobulk	DESeq2	LRT	glmGamPoi	scranSumFactors
Ralgps1	3dpi	0.508287		2618.09	1.09263e-06	2.39246e-05	4.87418	4.22471	77.1989	pseudobulk	DESeq2	LRT	glmGamPoi	scranSumFactors
Rdh14	3dpi	-0.831474		316.147	1.09659e-06	2.39846e-05	-4.87346	-4.22415	77.1474	pseudobulk	DESeq2	LRT	glmGamPoi	scranSumFactors
Coq7	3dpi	-0.988695		257.771	1.09764e-06	2.39846e-05	-4.87327	-4.22415	77.1337	pseudobulk	DESeq2	LRT	glmGamPoi	scranSumFactors
Psmg4	3dpi	-0.895342		131.597	1.1021e-06	2.40571e-05	-4.87247	-4.22347	77.076	pseudobulk	DESeq2	LRT	glmGamPoi	scranSumFactors
Vtn	3dpi	-4.41565		200.001	1.10979e-06	2.42001e-05	-4.8711	-4.22213	76.977	pseudobulk	DESeq2	LRT	glmGamPoi	scranSumFactors
Cirbp	3dpi	-0.838007		1170.07	1.13015e-06	2.46187e-05	-4.86751	-4.21827	76.7189	pseudobulk	DESeq2	LRT	glmGamPoi	scranSumFactors
Rfk	3dpi	-0.91866		123.491	1.13178e-06	2.46287e-05	-4.86722	-4.21818	76.6985	pseudobulk	DESeq2	LRT	glmGamPoi	scranSumFactors
Gm5617	3dpi	-1.56626		61.3629	1.13662e-06	2.46995e-05	-4.86638	-4.21753	76.638	pseudobulk	DESeq2	LRT	glmGamPoi	scranSumFactors
Srm	3dpi	-0.903188		187.171	1.13737e-06	2.46995e-05	-4.86625	-4.21753	76.6287	pseudobulk	DESeq2	LRT	glmGamPoi	scranSumFactors
Eno1b	3dpi	-1.04543		137.531	1.14174e-06	2.4769e-05	-4.86549	-4.21689	76.5744	pseudobulk	DESeq2	LRT	glmGamPoi	scranSumFactors
Gjb1	3dpi	-1.59791		160.655	1.14994e-06	2.4894e-05	-4.86407	-4.21576	76.4732	pseudobulk	DESeq2	LRT	glmGamPoi	scranSumFactors
Znrd2	3dpi	-1.26482		139.904	1.15089e-06	2.4894e-05	-4.86391	-4.21576	76.4616	pseudobulk	DESeq2	LRT	glmGamPoi	scranSumFactors
Tspo	3dpi	-1.84827		34.5814	1.15104e-06	2.4894e-05	-4.86388	-4.21576	76.4597	pseudobulk	DESeq2	LRT	glmGamPoi	scranSumFactors
Syf2	3dpi	-0.832073		260.175	1.15765e-06	2.50115e-05	-4.86275	-4.2147	76.3787	pseudobulk	DESeq2	LRT	glmGamPoi	scranSumFactors
Ppargc1b	3dpi	0.496033		712.251	1.16787e-06	2.52063e-05	4.86101	4.21294	76.2548	pseudobulk	DESeq2	LRT	glmGamPoi	scranSumFactors
Exosc4	3dpi	-0.90759		221.927	1.17364e-06	2.52872e-05	-4.86004	-4.21222	76.1852	pseudobulk	DESeq2	LRT	glmGamPoi	scranSumFactors
Mrpl34	3dpi	-1.52183		254.887	1.1741e-06	2.52872e-05	-4.85996	-4.21222	76.1797	pseudobulk	DESeq2	LRT	glmGamPoi	scranSumFactors
Pofut2	3dpi	-0.86087		254.435	1.1752e-06	2.52872e-05	-4.85977	-4.21222	76.1665	pseudobulk	DESeq2	LRT	glmGamPoi	scranSumFactors
Dlgap4	3dpi	0.50132		1456.53	1.18312e-06	2.54316e-05	4.85844	4.21093	76.072	pseudobulk	DESeq2	LRT	glmGamPoi	scranSumFactors
Idi1	3dpi	-0.862559		277.799	1.18756e-06	2.55012e-05	-4.8577	-4.21032	76.0192	pseudobulk	DESeq2	LRT	glmGamPoi	scranSumFactors
Mrpl43	3dpi	-0.9552		385.097	1.18973e-06	2.55071e-05	-4.85734	-4.21027	75.9936	pseudobulk	DESeq2	LRT	glmGamPoi	scranSumFactors
Atp1a2	3dpi	-1.63979		2746.45	1.19025e-06	2.55071e-05	-4.85725	-4.21027	75.9874	pseudobulk	DESeq2	LRT	glmGamPoi	scranSumFactors
H1f10	3dpi	-1.58815		193.976	1.2006e-06	2.57027e-05	-4.85554	-4.20854	75.8659	pseudobulk	DESeq2	LRT	glmGamPoi	scranSumFactors
Tmed7	3dpi	-0.583295		430.526	1.20731e-06	2.58204e-05	-4.85443	-4.20751	75.7875	pseudobulk	DESeq2	LRT	glmGamPoi	scranSumFactors
Mrps34	3dpi	-1.09845		842.601	1.21311e-06	2.59106e-05	-4.85348	-4.20672	75.7204	pseudobulk	DESeq2	LRT	glmGamPoi	scranSumFactors
Akr1a1	3dpi	-0.673467		935.651	1.21501e-06	2.59106e-05	-4.85317	-4.20672	75.6985	pseudobulk	DESeq2	LRT	glmGamPoi	scranSumFactors
Eci1	3dpi	-0.839532		194.638	1.21521e-06	2.59106e-05	-4.85314	-4.20672	75.6961	pseudobulk	DESeq2	LRT	glmGamPoi	scranSumFactors
Pfdn6	3dpi	-1.21185		375.755	1.22285e-06	2.60155e-05	-4.8519	-4.2058	75.6084	pseudobulk	DESeq2	LRT	glmGamPoi	scranSumFactors
ENSMUSG00000114615	3dpi	-1.63866		81.2836	1.2231e-06	2.60155e-05	-4.85186	-4.2058	75.6056	pseudobulk	DESeq2	LRT	glmGamPoi	scranSumFactors
Use1	3dpi	-0.822884		366.68	1.22382e-06	2.60155e-05	-4.85174	-4.2058	75.5972	pseudobulk	DESeq2	LRT	glmGamPoi	scranSumFactors
Glo1	3dpi	-1.56109		136.344	1.22644e-06	2.60448e-05	-4.85132	-4.20555	75.5674	pseudobulk	DESeq2	LRT	glmGamPoi	scranSumFactors
Hsd11b1	3dpi	-1.70205		99.9552	1.23438e-06	2.61619e-05	-4.85004	-4.20454	75.4771	pseudobulk	DESeq2	LRT	glmGamPoi	scranSumFactors
Abhd17a	3dpi	-0.841038		339.804	1.23492e-06	2.61619e-05	-4.84995	-4.20454	75.471	pseudobulk	DESeq2	LRT	glmGamPoi	scranSumFactors
Heatr5b	3dpi	0.478957		630.991	1.23566e-06	2.61619e-05	4.84983	4.20454	75.4626	pseudobulk	DESeq2	LRT	glmGamPoi	scranSumFactors
Ppwd1	3dpi	-0.58918		506.79	1.23902e-06	2.62066e-05	-4.84929	-4.20415	75.4247	pseudobulk	DESeq2	LRT	glmGamPoi	scranSumFactors
Psma6	3dpi	-0.951915		626.327	1.24387e-06	2.62829e-05	-4.84852	-4.20349	75.3702	pseudobulk	DESeq2	LRT	glmGamPoi	scranSumFactors
Eid1	3dpi	-0.8578		1005.57	1.24614e-06	2.63047e-05	-4.84816	-4.2033	75.3447	pseudobulk	DESeq2	LRT	glmGamPoi	scranSumFactors
Sptbn4	3dpi	0.497461		2146.07	1.25184e-06	2.63855e-05	4.84725	4.20261	75.281	pseudobulk	DESeq2	LRT	glmGamPoi	scranSumFactors
Camk2n2	3dpi	-1.16773		1012.98	1.25261e-06	2.63855e-05	-4.84713	-4.20261	75.2724	pseudobulk	DESeq2	LRT	glmGamPoi	scranSumFactors
D030024E09Rik	3dpi	-1.12738		90.8426	1.25372e-06	2.63855e-05	-4.84695	-4.20261	75.2601	pseudobulk	DESeq2	LRT	glmGamPoi	scranSumFactors
Arhgef19	3dpi	-1.50799		75.2438	1.25839e-06	2.64576e-05	-4.84621	-4.20199	75.2082	pseudobulk	DESeq2	LRT	glmGamPoi	scranSumFactors
Mrpl27	3dpi	-0.665767		386.719	1.26232e-06	2.65065e-05	-4.8456	-4.20157	75.1649	pseudobulk	DESeq2	LRT	glmGamPoi	scranSumFactors
Arl2	3dpi	-0.855523		600.57	1.26323e-06	2.65065e-05	-4.84545	-4.20157	75.1548	pseudobulk	DESeq2	LRT	glmGamPoi	scranSumFactors
Acsl3	3dpi	-0.689114		2187.43	1.2716e-06	2.66556e-05	-4.84414	-4.2003	75.0629	pseudobulk	DESeq2	LRT	glmGamPoi	scranSumFactors
ENSMUSG00000104710	3dpi	-0.888752		214.726	1.27602e-06	2.67219e-05	-4.84345	-4.19974	75.0146	pseudobulk	DESeq2	LRT	glmGamPoi	scranSumFactors
Ipw	3dpi	0.402312		14251.8	1.28355e-06	2.6838e-05	4.84228	4.19876	74.9329	pseudobulk	DESeq2	LRT	glmGamPoi	scranSumFactors
Sqor	3dpi	-1.38945		49.7374	1.28411e-06	2.6838e-05	-4.8422	-4.19876	74.9268	pseudobulk	DESeq2	LRT	glmGamPoi	scranSumFactors
Fhod3	3dpi	0.568117		1768.39	1.28955e-06	2.69037e-05	4.84136	4.19821	74.8682	pseudobulk	DESeq2	LRT	glmGamPoi	scranSumFactors
Olig1	3dpi	-1.45966		482.191	1.2898e-06	2.69037e-05	-4.84132	-4.19821	74.8655	pseudobulk	DESeq2	LRT	glmGamPoi	scranSumFactors
Gm10131	3dpi	-0.948504		146.147	1.2917e-06	2.69169e-05	-4.84103	-4.1981	74.845	pseudobulk	DESeq2	LRT	glmGamPoi	scranSumFactors
Kcnq2	3dpi	0.443281		1267.99	1.30119e-06	2.70879e-05	4.83957	4.19666	74.7435	pseudobulk	DESeq2	LRT	glmGamPoi	scranSumFactors
Ptpmt1	3dpi	-0.791562		325.745	1.30294e-06	2.70964e-05	-4.83931	-4.19659	74.7249	pseudobulk	DESeq2	LRT	glmGamPoi	scranSumFactors
Tsen34	3dpi	-0.7223		470.986	1.30745e-06	2.70964e-05	-4.83862	-4.19659	74.677	pseudobulk	DESeq2	LRT	glmGamPoi	scranSumFactors
Slc6a6	3dpi	0.435835		1347.51	1.30745e-06	2.70964e-05	4.83862	4.19659	74.677	pseudobulk	DESeq2	LRT	glmGamPoi	scranSumFactors
ENSMUSG00000081344	3dpi	-0.988915		100.625	1.30761e-06	2.70964e-05	-4.83859	-4.19659	74.6754	pseudobulk	DESeq2	LRT	glmGamPoi	scranSumFactors
Mrps16	3dpi	-0.986561		355.841	1.30815e-06	2.70964e-05	-4.83851	-4.19659	74.6696	pseudobulk	DESeq2	LRT	glmGamPoi	scranSumFactors
Ksr2	3dpi	0.673553		3286.95	1.3093e-06	2.70964e-05	4.83834	4.19659	74.6575	pseudobulk	DESeq2	LRT	glmGamPoi	scranSumFactors
Scn1b	3dpi	-0.761793		983.999	1.31568e-06	2.7202e-05	-4.83737	-4.19571	74.5901	pseudobulk	DESeq2	LRT	glmGamPoi	scranSumFactors
Fcf1	3dpi	-0.611204		366.638	1.31721e-06	2.72069e-05	-4.83714	-4.19567	74.5741	pseudobulk	DESeq2	LRT	glmGamPoi	scranSumFactors
ENSMUSG00000086592	3dpi	-0.936058		137.408	1.32427e-06	2.7326e-05	-4.83608	-4.19468	74.5002	pseudobulk	DESeq2	LRT	glmGamPoi	scranSumFactors
Ndufs6	3dpi	-1.53734		518.918	1.32933e-06	2.74036e-05	-4.83532	-4.19403	74.4475	pseudobulk	DESeq2	LRT	glmGamPoi	scranSumFactors
Ywhab	3dpi	-0.873459		1286.3	1.35096e-06	2.78224e-05	-4.83211	-4.19059	74.2249	pseudobulk	DESeq2	LRT	glmGamPoi	scranSumFactors
Ube4b	3dpi	0.421561		1736.39	1.35791e-06	2.79383e-05	4.83108	4.18965	74.1542	pseudobulk	DESeq2	LRT	glmGamPoi	scranSumFactors
Asrgl1	3dpi	-0.868211		700.47	1.36177e-06	2.79905e-05	-4.83052	-4.18923	74.1151	pseudobulk	DESeq2	LRT	glmGamPoi	scranSumFactors
Pard6a	3dpi	-0.902733		240.684	1.37408e-06	2.82159e-05	-4.82873	-4.18741	73.9915	pseudobulk	DESeq2	LRT	glmGamPoi	scranSumFactors
Med30	3dpi	-1.06836		227.659	1.38725e-06	2.84513e-05	-4.82683	-4.18552	73.8606	pseudobulk	DESeq2	LRT	glmGamPoi	scranSumFactors
Syt14	3dpi	0.506003		1317.31	1.38823e-06	2.84513e-05	4.82669	4.18552	73.8508	pseudobulk	DESeq2	LRT	glmGamPoi	scranSumFactors
Dnajc6	3dpi	0.383886		4042.66	1.39251e-06	2.85114e-05	4.82607	4.18504	73.8086	pseudobulk	DESeq2	LRT	glmGamPoi	scranSumFactors
H2-D1	3dpi	-1.04441		451.298	1.40176e-06	2.8673e-05	-4.82475	-4.18376	73.7179	pseudobulk	DESeq2	LRT	glmGamPoi	scranSumFactors
Yipf3	3dpi	-1.01196		336.057	1.40741e-06	2.87391e-05	-4.82395	-4.18323	73.6628	pseudobulk	DESeq2	LRT	glmGamPoi	scranSumFactors
Hmg20b	3dpi	-1.12468		152.104	1.4092e-06	2.87391e-05	-4.8237	-4.18323	73.6455	pseudobulk	DESeq2	LRT	glmGamPoi	scranSumFactors
D17H6S53E	3dpi	-1.12798		107.63	1.40925e-06	2.87391e-05	-4.82369	-4.18323	73.645	pseudobulk	DESeq2	LRT	glmGamPoi	scranSumFactors
Dctpp1	3dpi	-1.37394		49.8946	1.41043e-06	2.87391e-05	-4.82353	-4.18323	73.6335	pseudobulk	DESeq2	LRT	glmGamPoi	scranSumFactors
Zfyve28	3dpi	0.555986		841.384	1.41583e-06	2.88212e-05	4.82276	4.18259	73.5813	pseudobulk	DESeq2	LRT	glmGamPoi	scranSumFactors
Aga	3dpi	-0.941824		146.411	1.42461e-06	2.89722e-05	-4.82153	-4.1814	73.4967	pseudobulk	DESeq2	LRT	glmGamPoi	scranSumFactors
Slc25a21	3dpi	-1.28121		110.444	1.43859e-06	2.92283e-05	-4.81958	-4.1794	73.3635	pseudobulk	DESeq2	LRT	glmGamPoi	scranSumFactors
ND4	3dpi	-1.52483		283.389	1.45723e-06	2.95786e-05	-4.81701	-4.17669	73.1881	pseudobulk	DESeq2	LRT	glmGamPoi	scranSumFactors
Nucks1	3dpi	-0.560033		843.641	1.46218e-06	2.96504e-05	-4.81634	-4.17613	73.142	pseudobulk	DESeq2	LRT	glmGamPoi	scranSumFactors
Sap18	3dpi	-0.998428		592.728	1.47391e-06	2.98598e-05	-4.81474	-4.17453	73.0334	pseudobulk	DESeq2	LRT	glmGamPoi	scranSumFactors
Cyp2j6	3dpi	-1.16197		289.292	1.47763e-06	2.99063e-05	-4.81424	-4.17418	72.9992	pseudobulk	DESeq2	LRT	glmGamPoi	scranSumFactors
ENSMUSG00000086686	3dpi	-1.23388		90.7901	1.48719e-06	3.00712e-05	-4.81295	-4.17293	72.9116	pseudobulk	DESeq2	LRT	glmGamPoi	scranSumFactors
Tm4sf1	3dpi	-3.03834		27.6403	1.49376e-06	3.0175e-05	-4.81207	-4.17214	72.8519	pseudobulk	DESeq2	LRT	glmGamPoi	scranSumFactors
Pde4dip	3dpi	0.376434		3895.2	1.49676e-06	3.02067e-05	4.81167	4.1719	72.8247	pseudobulk	DESeq2	LRT	glmGamPoi	scranSumFactors
Prdx2	3dpi	-1.00282		1056.58	1.50341e-06	3.03121e-05	-4.81078	-4.17111	72.7646	pseudobulk	DESeq2	LRT	glmGamPoi	scranSumFactors
Atg3	3dpi	-0.472631		796.127	1.50505e-06	3.03161e-05	-4.81056	-4.17108	72.7499	pseudobulk	DESeq2	LRT	glmGamPoi	scranSumFactors
Rnf157	3dpi	0.550446		1762.99	1.51362e-06	3.04598e-05	4.80943	4.17	72.673	pseudobulk	DESeq2	LRT	glmGamPoi	scranSumFactors
Arhgap44	3dpi	0.507875		1982.8	1.52954e-06	3.07509e-05	4.80734	4.16783	72.5316	pseudobulk	DESeq2	LRT	glmGamPoi	scranSumFactors
Ifitm1	3dpi	-4.93443		28.4109	1.53446e-06	3.08204e-05	-4.8067	-4.16732	72.4883	pseudobulk	DESeq2	LRT	glmGamPoi	scranSumFactors
Slc48a1	3dpi	-0.583808		593.382	1.53787e-06	3.08596e-05	-4.80625	-4.16703	72.4584	pseudobulk	DESeq2	LRT	glmGamPoi	scranSumFactors
Eef1e1	3dpi	-0.923666		265.874	1.54482e-06	3.09696e-05	-4.80535	-4.16622	72.3976	pseudobulk	DESeq2	LRT	glmGamPoi	scranSumFactors
Rgma	3dpi	-0.925103		716.468	1.56718e-06	3.13808e-05	-4.80247	-4.16321	72.2041	pseudobulk	DESeq2	LRT	glmGamPoi	scranSumFactors
Med19	3dpi	-0.743525		254.613	1.56972e-06	3.13808e-05	-4.80215	-4.16321	72.1822	pseudobulk	DESeq2	LRT	glmGamPoi	scranSumFactors
Tomm20	3dpi	-0.95007		853.852	1.57064e-06	3.13808e-05	-4.80203	-4.16321	72.1744	pseudobulk	DESeq2	LRT	glmGamPoi	scranSumFactors
Sacs	3dpi	0.498755		954.949	1.57127e-06	3.13808e-05	4.80195	4.16321	72.169	pseudobulk	DESeq2	LRT	glmGamPoi	scranSumFactors
Garnl3	3dpi	0.485261		2829.4	1.57846e-06	3.14948e-05	4.80104	4.16238	72.1076	pseudobulk	DESeq2	LRT	glmGamPoi	scranSumFactors
ENSMUSG00000082519	3dpi	-1.91534		41.8363	1.58616e-06	3.16184e-05	-4.80006	-4.16149	72.0423	pseudobulk	DESeq2	LRT	glmGamPoi	scranSumFactors
Nat8f1	3dpi	-1.26059		176.272	1.59668e-06	3.17982e-05	-4.79874	-4.16019	71.9536	pseudobulk	DESeq2	LRT	glmGamPoi	scranSumFactors
ENSMUSG00000086157	3dpi	-0.9285		149.511	1.60104e-06	3.18549e-05	-4.79819	-4.15978	71.9171	pseudobulk	DESeq2	LRT	glmGamPoi	scranSumFactors
Nrg3	3dpi	0.384278		46433.1	1.60307e-06	3.18654e-05	4.79794	4.15971	71.9	pseudobulk	DESeq2	LRT	glmGamPoi	scranSumFactors
Eef1a1	3dpi	-1.13286		3231.35	1.61372e-06	3.20469e-05	-4.79661	-4.15841	71.8114	pseudobulk	DESeq2	LRT	glmGamPoi	scranSumFactors
Six5	3dpi	-2.37578		16.6755	1.61677e-06	3.20773e-05	-4.79623	-4.15819	71.7861	pseudobulk	DESeq2	LRT	glmGamPoi	scranSumFactors
Tubb2b	3dpi	-1.14557		428.229	1.62379e-06	3.21864e-05	-4.79536	-4.15742	71.7281	pseudobulk	DESeq2	LRT	glmGamPoi	scranSumFactors
Bicdl1	3dpi	0.564985		1347.78	1.63221e-06	3.23179e-05	4.79433	4.15649	71.659	pseudobulk	DESeq2	LRT	glmGamPoi	scranSumFactors
Lsm3	3dpi	-0.795666		224.824	1.63348e-06	3.23179e-05	-4.79417	-4.15649	71.6486	pseudobulk	DESeq2	LRT	glmGamPoi	scranSumFactors
Sub1	3dpi	-0.992228		909.374	1.64634e-06	3.25419e-05	-4.7926	-4.15491	71.5439	pseudobulk	DESeq2	LRT	glmGamPoi	scranSumFactors
C1d	3dpi	-1.00452		443.768	1.64878e-06	3.25596e-05	-4.7923	-4.15478	71.5241	pseudobulk	DESeq2	LRT	glmGamPoi	scranSumFactors
Camta1	3dpi	0.384291		9380.74	1.65047e-06	3.25626e-05	4.7921	4.15476	71.5104	pseudobulk	DESeq2	LRT	glmGamPoi	scranSumFactors
Hmgcs1	3dpi	-0.53472		802.126	1.6542e-06	3.25897e-05	-4.79164	-4.15457	71.4804	pseudobulk	DESeq2	LRT	glmGamPoi	scranSumFactors
H4c8	3dpi	-2.31794		17.2239	1.65494e-06	3.25897e-05	-4.79156	-4.15457	71.4744	pseudobulk	DESeq2	LRT	glmGamPoi	scranSumFactors
Dohh	3dpi	-1.03115		131.085	1.65889e-06	3.26305e-05	-4.79108	-4.15429	71.4426	pseudobulk	DESeq2	LRT	glmGamPoi	scranSumFactors
Gm13889	3dpi	-0.982274		136.161	1.6601e-06	3.26305e-05	-4.79093	-4.15429	71.4329	pseudobulk	DESeq2	LRT	glmGamPoi	scranSumFactors
Hspb1	3dpi	-3.45597		27.7309	1.66427e-06	3.26822e-05	-4.79043	-4.15392	71.3995	pseudobulk	DESeq2	LRT	glmGamPoi	scranSumFactors
Msl3l2	3dpi	-1.15325		113.846	1.684e-06	3.30113e-05	-4.78806	-4.15163	71.2427	pseudobulk	DESeq2	LRT	glmGamPoi	scranSumFactors
Smpdl3a	3dpi	-1.36609		145.825	1.68415e-06	3.30113e-05	-4.78804	-4.15163	71.2414	pseudobulk	DESeq2	LRT	glmGamPoi	scranSumFactors
Plin2	3dpi	-1.37871		47.4463	1.69001e-06	3.30823e-05	-4.78735	-4.15114	71.1953	pseudobulk	DESeq2	LRT	glmGamPoi	scranSumFactors
Tusc1	3dpi	-1.42442		43.5865	1.69091e-06	3.30823e-05	-4.78724	-4.15114	71.1882	pseudobulk	DESeq2	LRT	glmGamPoi	scranSumFactors
Med28	3dpi	-1.24881		314.876	1.69343e-06	3.3101e-05	-4.78694	-4.15101	71.1684	pseudobulk	DESeq2	LRT	glmGamPoi	scranSumFactors
Snw1	3dpi	-0.621907		505.718	1.69722e-06	3.31445e-05	-4.78649	-4.15071	71.1387	pseudobulk	DESeq2	LRT	glmGamPoi	scranSumFactors
Trappc4	3dpi	-1.03376		592.69	1.70263e-06	3.32193e-05	-4.78585	-4.15019	71.0965	pseudobulk	DESeq2	LRT	glmGamPoi	scranSumFactors
0610040B10Rik	3dpi	-0.900869		132.02	1.70955e-06	3.33001e-05	-4.78504	-4.14964	71.0427	pseudobulk	DESeq2	LRT	glmGamPoi	scranSumFactors
Ppp2ca	3dpi	-0.620518		1083.01	1.70992e-06	3.33001e-05	-4.78499	-4.14964	71.0398	pseudobulk	DESeq2	LRT	glmGamPoi	scranSumFactors
Tmem218	3dpi	-0.761972		171.006	1.72821e-06	3.36254e-05	-4.78286	-4.14741	70.8988	pseudobulk	DESeq2	LRT	glmGamPoi	scranSumFactors
Plscr2	3dpi	-1.96815		25.1348	1.73612e-06	3.37481e-05	-4.78194	-4.14658	70.8384	pseudobulk	DESeq2	LRT	glmGamPoi	scranSumFactors
Ss18l2	3dpi	-1.15296		316.297	1.74321e-06	3.38549e-05	-4.78112	-4.14585	70.7845	pseudobulk	DESeq2	LRT	glmGamPoi	scranSumFactors
Cxcl12	3dpi	-2.37997		64.2178	1.74659e-06	3.38892e-05	-4.78073	-4.14562	70.7589	pseudobulk	DESeq2	LRT	glmGamPoi	scranSumFactors
Nrg2	3dpi	0.411683		2016.13	1.77233e-06	3.43571e-05	4.77779	4.14248	70.5658	pseudobulk	DESeq2	LRT	glmGamPoi	scranSumFactors
Rnase1	3dpi	-3.17291		20.2521	1.77846e-06	3.44445e-05	-4.77709	-4.1419	70.5202	pseudobulk	DESeq2	LRT	glmGamPoi	scranSumFactors
Timp4	3dpi	-0.904838		369.96	1.78151e-06	3.44718e-05	-4.77675	-4.14172	70.4977	pseudobulk	DESeq2	LRT	glmGamPoi	scranSumFactors
Bcap31	3dpi	-0.83082		856.804	1.78446e-06	3.44974e-05	-4.77642	-4.14155	70.4759	pseudobulk	DESeq2	LRT	glmGamPoi	scranSumFactors
Endog	3dpi	-1.00795		218.521	1.79447e-06	3.46591e-05	-4.77529	-4.14047	70.4022	pseudobulk	DESeq2	LRT	glmGamPoi	scranSumFactors
Clta	3dpi	-0.738228		1505.36	1.79832e-06	3.47017e-05	-4.77486	-4.14019	70.3741	pseudobulk	DESeq2	LRT	glmGamPoi	scranSumFactors
Bex2	3dpi	-1.28445		2202.88	1.80231e-06	3.47471e-05	-4.77441	-4.13989	70.3449	pseudobulk	DESeq2	LRT	glmGamPoi	scranSumFactors
Tmbim6	3dpi	-0.795522		1204.13	1.80632e-06	3.47496e-05	-4.77397	-4.13987	70.3157	pseudobulk	DESeq2	LRT	glmGamPoi	scranSumFactors
Sez6l	3dpi	0.74349		1732.27	1.80714e-06	3.47496e-05	4.77388	4.13987	70.3097	pseudobulk	DESeq2	LRT	glmGamPoi	scranSumFactors
Nsa2	3dpi	-0.95766		188.684	1.80738e-06	3.47496e-05	-4.77385	-4.13987	70.308	pseudobulk	DESeq2	LRT	glmGamPoi	scranSumFactors
Epb41l1	3dpi	0.460129		2078.75	1.81198e-06	3.47855e-05	4.77334	4.13964	70.2745	pseudobulk	DESeq2	LRT	glmGamPoi	scranSumFactors
Rap1gap2	3dpi	0.51883		1342.28	1.81254e-06	3.47855e-05	4.77328	4.13964	70.2705	pseudobulk	DESeq2	LRT	glmGamPoi	scranSumFactors
Cfl2	3dpi	-0.791314		1039.78	1.82312e-06	3.49569e-05	-4.7721	-4.13851	70.194	pseudobulk	DESeq2	LRT	glmGamPoi	scranSumFactors
Zfand6	3dpi	-0.474374		1048.61	1.82691e-06	3.49857e-05	-4.77168	-4.13832	70.1668	pseudobulk	DESeq2	LRT	glmGamPoi	scranSumFactors
Vamp2	3dpi	-0.845792		896.721	1.82793e-06	3.49857e-05	-4.77157	-4.13832	70.1595	pseudobulk	DESeq2	LRT	glmGamPoi	scranSumFactors
Tmem14a	3dpi	-0.901909		230.679	1.83183e-06	3.50179e-05	-4.77114	-4.13811	70.1315	pseudobulk	DESeq2	LRT	glmGamPoi	scranSumFactors
ENSMUSG00000091228	3dpi	-1.09432		623.209	1.83293e-06	3.50179e-05	-4.77102	-4.13811	70.1236	pseudobulk	DESeq2	LRT	glmGamPoi	scranSumFactors
Rnase4	3dpi	-1.44839		40.9766	1.83946e-06	3.51109e-05	-4.77031	-4.1375	70.077	pseudobulk	DESeq2	LRT	glmGamPoi	scranSumFactors
ND2	3dpi	-1.28093		85.6507	1.85272e-06	3.53024e-05	-4.76886	-4.13625	69.9829	pseudobulk	DESeq2	LRT	glmGamPoi	scranSumFactors
Adora2b	3dpi	-1.99144		36.9161	1.85283e-06	3.53024e-05	-4.76885	-4.13625	69.9821	pseudobulk	DESeq2	LRT	glmGamPoi	scranSumFactors
Metrnl	3dpi	-1.17303		90.2675	1.85588e-06	3.53286e-05	-4.76852	-4.13608	69.9606	pseudobulk	DESeq2	LRT	glmGamPoi	scranSumFactors
Mrps24	3dpi	-0.693594		549.5	1.86834e-06	3.55339e-05	-4.76717	-4.13475	69.873	pseudobulk	DESeq2	LRT	glmGamPoi	scranSumFactors
Ndufaf3	3dpi	-1.05193		308.073	1.88349e-06	3.57898e-05	-4.76554	-4.1331	69.7675	pseudobulk	DESeq2	LRT	glmGamPoi	scranSumFactors
Wbp2	3dpi	-0.612635		587.087	1.89578e-06	3.59624e-05	-4.76423	-4.132	69.6826	pseudobulk	DESeq2	LRT	glmGamPoi	scranSumFactors
Ropn1l	3dpi	-1.33918		100.869	1.89598e-06	3.59624e-05	-4.76421	-4.132	69.6813	pseudobulk	DESeq2	LRT	glmGamPoi	scranSumFactors
Akap9	3dpi	0.434133		2883.74	1.90429e-06	3.60875e-05	4.76333	4.1312	69.6243	pseudobulk	DESeq2	LRT	glmGamPoi	scranSumFactors
Cacna1i	3dpi	0.500293		440.878	1.90961e-06	3.6156e-05	4.76276	4.13076	69.5879	pseudobulk	DESeq2	LRT	glmGamPoi	scranSumFactors
Cryab	3dpi	-1.7569		725.288	1.91162e-06	3.61617e-05	-4.76255	-4.13073	69.5742	pseudobulk	DESeq2	LRT	glmGamPoi	scranSumFactors
Slc12a4	3dpi	-1.58916		47.6007	1.91935e-06	3.62754e-05	-4.76174	-4.13001	69.5217	pseudobulk	DESeq2	LRT	glmGamPoi	scranSumFactors
Siva1	3dpi	-0.891147		118.597	1.92463e-06	3.63427e-05	-4.76118	-4.12958	69.4859	pseudobulk	DESeq2	LRT	glmGamPoi	scranSumFactors
Ptgds	3dpi	-2.31271		12298.4	1.93119e-06	3.6434e-05	-4.76049	-4.129	69.4416	pseudobulk	DESeq2	LRT	glmGamPoi	scranSumFactors
Rsl24d1	3dpi	-0.986779		192.477	1.9342e-06	3.64583e-05	-4.76018	-4.12885	69.4214	pseudobulk	DESeq2	LRT	glmGamPoi	scranSumFactors
Soat1	3dpi	-0.751221		424.869	1.93638e-06	3.64668e-05	-4.75995	-4.1288	69.4067	pseudobulk	DESeq2	LRT	glmGamPoi	scranSumFactors
Znhit1	3dpi	-1.04003		347.407	1.94025e-06	3.64827e-05	-4.75955	-4.1287	69.3808	pseudobulk	DESeq2	LRT	glmGamPoi	scranSumFactors
Psmd8	3dpi	-0.897304		299.8	1.94068e-06	3.64827e-05	-4.75951	-4.1287	69.3779	pseudobulk	DESeq2	LRT	glmGamPoi	scranSumFactors
Surf1	3dpi	-0.832203		297.574	1.95677e-06	3.66999e-05	-4.75784	-4.12733	69.2707	pseudobulk	DESeq2	LRT	glmGamPoi	scranSumFactors
Tbc1d30	3dpi	0.584336		476.601	1.95714e-06	3.66999e-05	4.7578	4.12733	69.2683	pseudobulk	DESeq2	LRT	glmGamPoi	scranSumFactors
Calm1	3dpi	-0.975939		3908.77	1.95744e-06	3.66999e-05	-4.75777	-4.12733	69.2662	pseudobulk	DESeq2	LRT	glmGamPoi	scranSumFactors
Gabarapl1	3dpi	-0.997238		706.783	1.97047e-06	3.69113e-05	-4.75643	-4.12601	69.1802	pseudobulk	DESeq2	LRT	glmGamPoi	scranSumFactors
Smim10l1	3dpi	-0.738819		672.686	1.97618e-06	3.69855e-05	-4.75585	-4.12555	69.1427	pseudobulk	DESeq2	LRT	glmGamPoi	scranSumFactors
Rab6a	3dpi	-0.383881		1547.12	1.97868e-06	3.69898e-05	-4.75559	-4.12552	69.1263	pseudobulk	DESeq2	LRT	glmGamPoi	scranSumFactors
Tubb2a	3dpi	-1.28575		2411.29	1.97991e-06	3.69898e-05	-4.75546	-4.12552	69.1183	pseudobulk	DESeq2	LRT	glmGamPoi	scranSumFactors
Yipf4	3dpi	-0.790116		818.054	1.99037e-06	3.71525e-05	-4.7544	-4.12451	69.05	pseudobulk	DESeq2	LRT	glmGamPoi	scranSumFactors
Rrm2b	3dpi	-0.638421		541.375	2.00528e-06	3.73977e-05	-4.75289	-4.123	68.9535	pseudobulk	DESeq2	LRT	glmGamPoi	scranSumFactors
Rpl17-ps3	3dpi	-1.06578		290.301	2.02106e-06	3.76587e-05	-4.75131	-4.12139	68.8523	pseudobulk	DESeq2	LRT	glmGamPoi	scranSumFactors
Vps35l	3dpi	0.385223		1155.44	2.02673e-06	3.77311e-05	4.75074	4.12095	68.8161	pseudobulk	DESeq2	LRT	glmGamPoi	scranSumFactors
ENSMUSG00000103672	3dpi	-0.797876		147.595	2.04032e-06	3.79362e-05	-4.74939	-4.1197	68.7299	pseudobulk	DESeq2	LRT	glmGamPoi	scranSumFactors
Marcks	3dpi	-0.883989		783.494	2.04141e-06	3.79362e-05	-4.74928	-4.1197	68.723	pseudobulk	DESeq2	LRT	glmGamPoi	scranSumFactors
Dpp6	3dpi	0.528017		15973.3	2.0447e-06	3.79362e-05	4.74896	4.1197	68.7023	pseudobulk	DESeq2	LRT	glmGamPoi	scranSumFactors
Ggh	3dpi	-0.853013		284.805	2.04493e-06	3.79362e-05	-4.74893	-4.1197	68.7008	pseudobulk	DESeq2	LRT	glmGamPoi	scranSumFactors
Nkx2-2	3dpi	-1.17826		127.791	2.05947e-06	3.81406e-05	-4.7475	-4.11846	68.6096	pseudobulk	DESeq2	LRT	glmGamPoi	scranSumFactors
Tppp3	3dpi	-0.917807		274.319	2.05955e-06	3.81406e-05	-4.74749	-4.11846	68.609	pseudobulk	DESeq2	LRT	glmGamPoi	scranSumFactors
Gjb2	3dpi	-3.12198		37.9353	2.06758e-06	3.82557e-05	-4.7467	-4.11777	68.559	pseudobulk	DESeq2	LRT	glmGamPoi	scranSumFactors
Rgcc	3dpi	-1.14968		167.695	2.08117e-06	3.84734e-05	-4.74538	-4.11646	68.4748	pseudobulk	DESeq2	LRT	glmGamPoi	scranSumFactors
Tprkb	3dpi	-0.706313		748.611	2.09583e-06	3.86957e-05	-4.74396	-4.11513	68.3846	pseudobulk	DESeq2	LRT	glmGamPoi	scranSumFactors
Wdfy3	3dpi	0.383819		3447.15	2.09727e-06	3.86957e-05	4.74382	4.11513	68.3758	pseudobulk	DESeq2	LRT	glmGamPoi	scranSumFactors
Slc8a3	3dpi	0.569871		2520.54	2.09869e-06	3.86957e-05	4.74368	4.11513	68.3671	pseudobulk	DESeq2	LRT	glmGamPoi	scranSumFactors
0610009L18Rik	3dpi	-0.960824		95.8146	2.1058e-06	3.87929e-05	-4.743	-4.11455	68.3238	pseudobulk	DESeq2	LRT	glmGamPoi	scranSumFactors
Ppa1	3dpi	-0.766322		611.285	2.11296e-06	3.88801e-05	-4.74231	-4.11404	68.2802	pseudobulk	DESeq2	LRT	glmGamPoi	scranSumFactors
Rab4b	3dpi	-0.662816		357.222	2.11522e-06	3.88801e-05	-4.74209	-4.11404	68.2666	pseudobulk	DESeq2	LRT	glmGamPoi	scranSumFactors
Gm22504	3dpi	-1.60108		32.3046	2.11605e-06	3.88801e-05	-4.74201	-4.11404	68.2615	pseudobulk	DESeq2	LRT	glmGamPoi	scranSumFactors
Pin4	3dpi	-1.09259		135.416	2.12062e-06	3.89303e-05	-4.74158	-4.11374	68.2338	pseudobulk	DESeq2	LRT	glmGamPoi	scranSumFactors
Ppm1l	3dpi	0.636416		1711.76	2.12293e-06	3.89389e-05	4.74136	4.11369	68.2199	pseudobulk	DESeq2	LRT	glmGamPoi	scranSumFactors
Klhl29	3dpi	0.553168		3309.11	2.13815e-06	3.91839e-05	4.73991	4.11224	68.1285	pseudobulk	DESeq2	LRT	glmGamPoi	scranSumFactors
Med29	3dpi	-1.34415		111.692	2.14235e-06	3.9227e-05	-4.73951	-4.11199	68.1033	pseudobulk	DESeq2	LRT	glmGamPoi	scranSumFactors
Serbp1	3dpi	-0.53069		1109.67	2.14973e-06	3.93168e-05	-4.73881	-4.11146	68.0594	pseudobulk	DESeq2	LRT	glmGamPoi	scranSumFactors
D8Ertd738e	3dpi	-0.911365		484.836	2.15098e-06	3.93168e-05	-4.7387	-4.11146	68.052	pseudobulk	DESeq2	LRT	glmGamPoi	scranSumFactors
Hsp90aa1	3dpi	-1.12899		2632.52	2.15959e-06	3.94391e-05	-4.73789	-4.11074	68.0009	pseudobulk	DESeq2	LRT	glmGamPoi	scranSumFactors
Stub1	3dpi	-0.914717		1123.66	2.1616e-06	3.94391e-05	-4.7377	-4.11074	67.9891	pseudobulk	DESeq2	LRT	glmGamPoi	scranSumFactors
ENSMUSG00000095334	3dpi	-0.725966		1192.19	2.16327e-06	3.94391e-05	-4.73754	-4.11074	67.9792	pseudobulk	DESeq2	LRT	glmGamPoi	scranSumFactors
1110038F14Rik	3dpi	-0.710545		317.951	2.18378e-06	3.97715e-05	-4.73563	-4.1088	67.8587	pseudobulk	DESeq2	LRT	glmGamPoi	scranSumFactors
Zmynd8	3dpi	0.445198		3517.25	2.18527e-06	3.97715e-05	4.73549	4.1088	67.8501	pseudobulk	DESeq2	LRT	glmGamPoi	scranSumFactors
Pink1	3dpi	-0.551846		450.308	2.19453e-06	3.99056e-05	-4.73463	-4.10803	67.7962	pseudobulk	DESeq2	LRT	glmGamPoi	scranSumFactors
Rps2-ps10	3dpi	-1.26543		103.603	2.20275e-06	4.00124e-05	-4.73387	-4.10741	67.7486	pseudobulk	DESeq2	LRT	glmGamPoi	scranSumFactors
Isca1	3dpi	-0.70599		440.571	2.20677e-06	4.00124e-05	-4.7335	-4.10741	67.7254	pseudobulk	DESeq2	LRT	glmGamPoi	scranSumFactors
Rpl22	3dpi	-0.65962		514.912	2.20707e-06	4.00124e-05	-4.73348	-4.10741	67.7236	pseudobulk	DESeq2	LRT	glmGamPoi	scranSumFactors
Cldnd1	3dpi	-0.701503		460.836	2.20797e-06	4.00124e-05	-4.73339	-4.10741	67.7184	pseudobulk	DESeq2	LRT	glmGamPoi	scranSumFactors
U2af2	3dpi	-0.480536		581.02	2.21236e-06	4.00205e-05	-4.73299	-4.10736	67.6932	pseudobulk	DESeq2	LRT	glmGamPoi	scranSumFactors
Igfbp2	3dpi	-3.21713		108.99	2.21385e-06	4.00205e-05	-4.73285	-4.10736	67.6846	pseudobulk	DESeq2	LRT	glmGamPoi	scranSumFactors
Papola	3dpi	0.403092		2522.3	2.2141e-06	4.00205e-05	4.73283	4.10736	67.6831	pseudobulk	DESeq2	LRT	glmGamPoi	scranSumFactors
Fads2	3dpi	-0.83656		518.325	2.21953e-06	4.00843e-05	-4.73233	-4.10699	67.652	pseudobulk	DESeq2	LRT	glmGamPoi	scranSumFactors
Tceal6	3dpi	-1.1906		301.39	2.22433e-06	4.01366e-05	-4.7319	-4.10669	67.6246	pseudobulk	DESeq2	LRT	glmGamPoi	scranSumFactors
Cmbl	3dpi	-0.844925		129.02	2.22898e-06	4.01863e-05	-4.73147	-4.10641	67.598	pseudobulk	DESeq2	LRT	glmGamPoi	scranSumFactors
Zswim3	3dpi	0.72475		252.846	2.23848e-06	4.03231e-05	4.73061	4.10562	67.544	pseudobulk	DESeq2	LRT	glmGamPoi	scranSumFactors
Polr2d	3dpi	-0.902987		114.201	2.2434e-06	4.03775e-05	-4.73016	-4.10531	67.5161	pseudobulk	DESeq2	LRT	glmGamPoi	scranSumFactors
Nsmce4a	3dpi	-1.39822		135.586	2.25138e-06	4.04865e-05	-4.72944	-4.10469	67.471	pseudobulk	DESeq2	LRT	glmGamPoi	scranSumFactors
H3f3b	3dpi	-1.03604		2170.98	2.26301e-06	4.06119e-05	-4.7284	-4.10397	67.4057	pseudobulk	DESeq2	LRT	glmGamPoi	scranSumFactors
Pcsk2	3dpi	0.572094		4065.18	2.26384e-06	4.06119e-05	4.72832	4.10397	67.401	pseudobulk	DESeq2	LRT	glmGamPoi	scranSumFactors
Vegfb	3dpi	-0.829184		682.589	2.26412e-06	4.06119e-05	-4.7283	-4.10397	67.3995	pseudobulk	DESeq2	LRT	glmGamPoi	scranSumFactors
Ninj1	3dpi	-1.18399		133.728	2.27259e-06	4.07292e-05	-4.72754	-4.1033	67.3522	pseudobulk	DESeq2	LRT	glmGamPoi	scranSumFactors
Gm4540	3dpi	-1.18927		77.3886	2.2755e-06	4.07307e-05	-4.72728	-4.1033	67.3359	pseudobulk	DESeq2	LRT	glmGamPoi	scranSumFactors
Acot2	3dpi	-1.28721		51.8618	2.27652e-06	4.07307e-05	-4.72719	-4.1033	67.3302	pseudobulk	DESeq2	LRT	glmGamPoi	scranSumFactors
Xaf1	3dpi	-1.15664		116.356	2.28376e-06	4.08255e-05	-4.72654	-4.10276	67.2901	pseudobulk	DESeq2	LRT	glmGamPoi	scranSumFactors
Timm10	3dpi	-1.20149		171.698	2.28655e-06	4.08409e-05	-4.72629	-4.10267	67.2746	pseudobulk	DESeq2	LRT	glmGamPoi	scranSumFactors
Znrd1	3dpi	-0.75469		208.923	2.29806e-06	4.10119e-05	-4.72527	-4.1017	67.2111	pseudobulk	DESeq2	LRT	glmGamPoi	scranSumFactors
ENSMUSG00000112437	3dpi	-1.13308		1373.71	2.30789e-06	4.1127e-05	-4.72441	-4.10106	67.1572	pseudobulk	DESeq2	LRT	glmGamPoi	scranSumFactors
ENSMUSG00000095538	3dpi	-0.824874		247.699	2.31083e-06	4.1127e-05	-4.72415	-4.10106	67.1411	pseudobulk	DESeq2	LRT	glmGamPoi	scranSumFactors
Rab18	3dpi	-0.613594		560.936	2.31178e-06	4.1127e-05	-4.72406	-4.10106	67.1358	pseudobulk	DESeq2	LRT	glmGamPoi	scranSumFactors
Tbc1d10a	3dpi	-0.690772		197.998	2.3123e-06	4.1127e-05	-4.72402	-4.10106	67.133	pseudobulk	DESeq2	LRT	glmGamPoi	scranSumFactors
Egfr	3dpi	-1.54941		379.102	2.33277e-06	4.14562e-05	-4.72223	-4.09921	67.0217	pseudobulk	DESeq2	LRT	glmGamPoi	scranSumFactors
Ino80b	3dpi	-1.07931		113.682	2.3523e-06	4.17681e-05	-4.72053	-4.09747	66.9166	pseudobulk	DESeq2	LRT	glmGamPoi	scranSumFactors
Asb8	3dpi	-0.677626		375.471	2.36051e-06	4.18767e-05	-4.71982	-4.09687	66.8728	pseudobulk	DESeq2	LRT	glmGamPoi	scranSumFactors
Ormdl2	3dpi	-0.958692		150.885	2.36238e-06	4.18767e-05	-4.71966	-4.09687	66.8628	pseudobulk	DESeq2	LRT	glmGamPoi	scranSumFactors
Mtarc2	3dpi	-0.883508		492.43	2.38414e-06	4.21953e-05	-4.7178	-4.09512	66.7474	pseudobulk	DESeq2	LRT	glmGamPoi	scranSumFactors
Nktr	3dpi	0.354781		3690.32	2.38536e-06	4.21953e-05	4.71769	4.09512	66.741	pseudobulk	DESeq2	LRT	glmGamPoi	scranSumFactors
Med12l	3dpi	0.424521		3284.72	2.38787e-06	4.21953e-05	4.71748	4.09512	66.7278	pseudobulk	DESeq2	LRT	glmGamPoi	scranSumFactors
Sall3	3dpi	-1.55227		105.842	2.39e-06	4.21953e-05	-4.7173	-4.09512	66.7166	pseudobulk	DESeq2	LRT	glmGamPoi	scranSumFactors
Rptor	3dpi	0.483981		1900.59	2.39033e-06	4.21953e-05	4.71727	4.09512	66.7148	pseudobulk	DESeq2	LRT	glmGamPoi	scranSumFactors
Lamtor5	3dpi	-0.851261		328.709	2.40741e-06	4.24612e-05	-4.71582	-4.09366	66.6254	pseudobulk	DESeq2	LRT	glmGamPoi	scranSumFactors
Psmb7	3dpi	-0.523206		759.631	2.42239e-06	4.26495e-05	-4.71456	-4.09264	66.5476	pseudobulk	DESeq2	LRT	glmGamPoi	scranSumFactors
Bpgm	3dpi	-0.723105		316.531	2.42328e-06	4.26495e-05	-4.71448	-4.09264	66.543	pseudobulk	DESeq2	LRT	glmGamPoi	scranSumFactors
Gm8355	3dpi	0.987682		86.7088	2.42414e-06	4.26495e-05	4.71441	4.09264	66.5386	pseudobulk	DESeq2	LRT	glmGamPoi	scranSumFactors
Psma2	3dpi	-0.668716		1216.89	2.43101e-06	4.27349e-05	-4.71383	-4.09217	66.5031	pseudobulk	DESeq2	LRT	glmGamPoi	scranSumFactors
Cox20	3dpi	-0.721023		394.214	2.43891e-06	4.2838e-05	-4.71317	-4.09161	66.4624	pseudobulk	DESeq2	LRT	glmGamPoi	scranSumFactors
Pin1	3dpi	-1.00759		402.795	2.44362e-06	4.28797e-05	-4.71278	-4.09139	66.4383	pseudobulk	DESeq2	LRT	glmGamPoi	scranSumFactors
Scai	3dpi	0.376836		2370.63	2.44705e-06	4.28797e-05	4.71249	4.09139	66.4207	pseudobulk	DESeq2	LRT	glmGamPoi	scranSumFactors
Ednrb	3dpi	-1.58696		364.046	2.44737e-06	4.28797e-05	-4.71247	-4.09139	66.4191	pseudobulk	DESeq2	LRT	glmGamPoi	scranSumFactors
Vdac3	3dpi	-0.939144		1055.79	2.4617e-06	4.3095e-05	-4.71128	-4.09023	66.346	pseudobulk	DESeq2	LRT	glmGamPoi	scranSumFactors
Eif4a2	3dpi	-0.677984		1517.87	2.46569e-06	4.31291e-05	-4.71095	-4.09004	66.3258	pseudobulk	DESeq2	LRT	glmGamPoi	scranSumFactors
Map6	3dpi	0.529887		1329.64	2.46926e-06	4.31558e-05	4.71065	4.0899	66.3077	pseudobulk	DESeq2	LRT	glmGamPoi	scranSumFactors
Slc6a9	3dpi	-0.82306		410.306	2.47223e-06	4.3172e-05	-4.71041	-4.08981	66.2927	pseudobulk	DESeq2	LRT	glmGamPoi	scranSumFactors
Eef1a2	3dpi	-0.882348		889.212	2.47518e-06	4.31879e-05	-4.71016	-4.08973	66.2778	pseudobulk	DESeq2	LRT	glmGamPoi	scranSumFactors
Mfsd5	3dpi	-1.15759		101.567	2.48115e-06	4.32564e-05	-4.70967	-4.08936	66.2476	pseudobulk	DESeq2	LRT	glmGamPoi	scranSumFactors
5430405H02Rik	3dpi	-0.504784		444.94	2.48982e-06	4.33718e-05	-4.70896	-4.08874	66.2041	pseudobulk	DESeq2	LRT	glmGamPoi	scranSumFactors
Rbfox2	3dpi	0.470299		3837.2	2.49597e-06	4.34431e-05	4.70846	4.08836	66.1733	pseudobulk	DESeq2	LRT	glmGamPoi	scranSumFactors
Thap11	3dpi	-1.41737		74.6359	2.499e-06	4.346e-05	-4.70821	-4.08827	66.1582	pseudobulk	DESeq2	LRT	glmGamPoi	scranSumFactors
Fdx1	3dpi	-0.810474		206.927	2.50459e-06	4.35214e-05	-4.70776	-4.08794	66.1303	pseudobulk	DESeq2	LRT	glmGamPoi	scranSumFactors
Tubb4a	3dpi	-0.978358		1564.52	2.51018e-06	4.35558e-05	-4.7073	-4.08776	66.1025	pseudobulk	DESeq2	LRT	glmGamPoi	scranSumFactors
1110059G10Rik	3dpi	-0.917165		118.876	2.51069e-06	4.35558e-05	-4.70726	-4.08776	66.0999	pseudobulk	DESeq2	LRT	glmGamPoi	scranSumFactors
Arl6ip1	3dpi	-1.0979		2998.53	2.51631e-06	4.36174e-05	-4.7068	-4.08743	66.0721	pseudobulk	DESeq2	LRT	glmGamPoi	scranSumFactors
Vamp8	3dpi	-1.97357		26.4269	2.52712e-06	4.37688e-05	-4.70593	-4.08663	66.0187	pseudobulk	DESeq2	LRT	glmGamPoi	scranSumFactors
Wdr89	3dpi	-0.714179		357.305	2.52981e-06	4.3771e-05	-4.70571	-4.08662	66.0054	pseudobulk	DESeq2	LRT	glmGamPoi	scranSumFactors
Tm2d1	3dpi	-0.676711		704.058	2.53141e-06	4.3771e-05	-4.70558	-4.08662	65.9976	pseudobulk	DESeq2	LRT	glmGamPoi	scranSumFactors
Atp5a1	3dpi	-0.783027		1511.44	2.53345e-06	4.3771e-05	-4.70542	-4.08662	65.9875	pseudobulk	DESeq2	LRT	glmGamPoi	scranSumFactors
Lamtor2	3dpi	-1.02921		766.598	2.54145e-06	4.38733e-05	-4.70478	-4.08607	65.9483	pseudobulk	DESeq2	LRT	glmGamPoi	scranSumFactors
ENSMUSG00000116868	3dpi	-1.18159		79.3161	2.557e-06	4.41057e-05	-4.70353	-4.08485	65.8724	pseudobulk	DESeq2	LRT	glmGamPoi	scranSumFactors
Snrnp27	3dpi	-0.793694		393.78	2.56178e-06	4.41521e-05	-4.70315	-4.0846	65.8492	pseudobulk	DESeq2	LRT	glmGamPoi	scranSumFactors
Snrpb2	3dpi	-0.712303		181.874	2.57266e-06	4.42791e-05	-4.70228	-4.08394	65.7966	pseudobulk	DESeq2	LRT	glmGamPoi	scranSumFactors
Mea1	3dpi	-1.50255		192.984	2.57334e-06	4.42791e-05	-4.70223	-4.08394	65.7933	pseudobulk	DESeq2	LRT	glmGamPoi	scranSumFactors
Ptprq	3dpi	-1.0521		126.076	2.58516e-06	4.44407e-05	-4.7013	-4.08309	65.7364	pseudobulk	DESeq2	LRT	glmGamPoi	scranSumFactors
Prdx4	3dpi	-1.0264		299.164	2.58694e-06	4.44407e-05	-4.70115	-4.08309	65.7279	pseudobulk	DESeq2	LRT	glmGamPoi	scranSumFactors
Ube2a	3dpi	-0.645053		232.982	2.60096e-06	4.46452e-05	-4.70005	-4.08202	65.6609	pseudobulk	DESeq2	LRT	glmGamPoi	scranSumFactors
Tbcb	3dpi	-1.02515		604.372	2.60799e-06	4.47296e-05	-4.6995	-4.08159	65.6274	pseudobulk	DESeq2	LRT	glmGamPoi	scranSumFactors
Psmd6	3dpi	-0.675493		459.517	2.61362e-06	4.47834e-05	-4.69906	-4.08131	65.6007	pseudobulk	DESeq2	LRT	glmGamPoi	scranSumFactors
Adprh	3dpi	-0.959161		504.7	2.61537e-06	4.47834e-05	-4.69892	-4.08131	65.5924	pseudobulk	DESeq2	LRT	glmGamPoi	scranSumFactors
Slc2a13	3dpi	0.548721		2897.65	2.62086e-06	4.48412e-05	4.69849	4.08101	65.5664	pseudobulk	DESeq2	LRT	glmGamPoi	scranSumFactors
Cisd3	3dpi	-1.17353		156.224	2.67834e-06	4.57875e-05	-4.69406	-4.07615	65.2983	pseudobulk	DESeq2	LRT	glmGamPoi	scranSumFactors
ENSMUSG00000117604	3dpi	0.571653		750.478	2.68395e-06	4.58464e-05	4.69363	4.07585	65.2725	pseudobulk	DESeq2	LRT	glmGamPoi	scranSumFactors
Gsk3a	3dpi	-0.557538		380.798	2.68968e-06	4.59071e-05	-4.6932	-4.07554	65.2462	pseudobulk	DESeq2	LRT	glmGamPoi	scranSumFactors
Csrp1	3dpi	-1.1661		622.465	2.69505e-06	4.59381e-05	-4.69279	-4.07539	65.2216	pseudobulk	DESeq2	LRT	glmGamPoi	scranSumFactors
Ndufv1	3dpi	-1.03059		571.981	2.69585e-06	4.59381e-05	-4.69273	-4.07539	65.2179	pseudobulk	DESeq2	LRT	glmGamPoi	scranSumFactors
Prkce	3dpi	0.674975		4114.66	2.71943e-06	4.63026e-05	4.69095	4.07355	65.1107	pseudobulk	DESeq2	LRT	glmGamPoi	scranSumFactors
Trir	3dpi	-0.729078		532.433	2.7252e-06	4.63636e-05	-4.69051	-4.07324	65.0846	pseudobulk	DESeq2	LRT	glmGamPoi	scranSumFactors
Dym	3dpi	0.447557		1553.37	2.73252e-06	4.64506e-05	4.68996	4.0728	65.0516	pseudobulk	DESeq2	LRT	glmGamPoi	scranSumFactors
Ptrh2	3dpi	-0.704029		184.128	2.74187e-06	4.65721e-05	-4.68927	-4.0722	65.0096	pseudobulk	DESeq2	LRT	glmGamPoi	scranSumFactors
Nrarp	3dpi	-2.08815		61.6409	2.75277e-06	4.67197e-05	-4.68845	-4.07146	64.9609	pseudobulk	DESeq2	LRT	glmGamPoi	scranSumFactors
Nkiras1	3dpi	-0.681521		838.643	2.76439e-06	4.68793e-05	-4.68759	-4.07066	64.9091	pseudobulk	DESeq2	LRT	glmGamPoi	scranSumFactors
Cbx3	3dpi	-0.636104		918.089	2.78453e-06	4.71518e-05	-4.68611	-4.06931	64.8201	pseudobulk	DESeq2	LRT	glmGamPoi	scranSumFactors
Tiam1	3dpi	0.703582		1360.89	2.78492e-06	4.71518e-05	4.68608	4.06931	64.8183	pseudobulk	DESeq2	LRT	glmGamPoi	scranSumFactors
Scrg1	3dpi	-1.18335		179.131	2.79669e-06	4.72901e-05	-4.68521	-4.06863	64.7667	pseudobulk	DESeq2	LRT	glmGamPoi	scranSumFactors
Sycp2	3dpi	-0.602742		577.984	2.79757e-06	4.72901e-05	-4.68515	-4.06863	64.7628	pseudobulk	DESeq2	LRT	glmGamPoi	scranSumFactors
Ghitm	3dpi	-0.823444		536.005	2.81208e-06	4.74448e-05	-4.68409	-4.06787	64.6995	pseudobulk	DESeq2	LRT	glmGamPoi	scranSumFactors
Timm17b	3dpi	-0.914942		174.245	2.81338e-06	4.74448e-05	-4.68399	-4.06787	64.6938	pseudobulk	DESeq2	LRT	glmGamPoi	scranSumFactors
A230077H06Rik	3dpi	0.855806		148.989	2.81545e-06	4.74448e-05	4.68384	4.06787	64.6848	pseudobulk	DESeq2	LRT	glmGamPoi	scranSumFactors
Pnrc2	3dpi	-0.979304		112.086	2.8157e-06	4.74448e-05	-4.68383	-4.06787	64.6837	pseudobulk	DESeq2	LRT	glmGamPoi	scranSumFactors
Cbr1	3dpi	-1.13464		422.407	2.82952e-06	4.76396e-05	-4.68282	-4.06692	64.6238	pseudobulk	DESeq2	LRT	glmGamPoi	scranSumFactors
Hsp90ab1	3dpi	-1.16333		3563.52	2.83656e-06	4.77202e-05	-4.68231	-4.06652	64.5934	pseudobulk	DESeq2	LRT	glmGamPoi	scranSumFactors
Hopx	3dpi	-1.86166		120.963	2.84864e-06	4.7875e-05	-4.68144	-4.06577	64.5415	pseudobulk	DESeq2	LRT	glmGamPoi	scranSumFactors
Cideb	3dpi	-2.4618		17.6947	2.85029e-06	4.7875e-05	-4.68132	-4.06577	64.5344	pseudobulk	DESeq2	LRT	glmGamPoi	scranSumFactors
Emc7	3dpi	-0.869529		1293.97	2.86092e-06	4.80153e-05	-4.68056	-4.06508	64.489	pseudobulk	DESeq2	LRT	glmGamPoi	scranSumFactors
ENSMUSG00000113757	3dpi	-1.47546		35.9282	2.87008e-06	4.81308e-05	-4.6799	-4.06452	64.45	pseudobulk	DESeq2	LRT	glmGamPoi	scranSumFactors
Marcksl1	3dpi	-1.36854		214.835	2.88106e-06	4.82765e-05	-4.67912	-4.06382	64.4034	pseudobulk	DESeq2	LRT	glmGamPoi	scranSumFactors
Dcxr	3dpi	-1.67041		30.7142	2.89998e-06	4.85328e-05	-4.67778	-4.06258	64.3236	pseudobulk	DESeq2	LRT	glmGamPoi	scranSumFactors
Sgsm1	3dpi	0.735091		1308.27	2.90094e-06	4.85328e-05	4.67771	4.06258	64.3196	pseudobulk	DESeq2	LRT	glmGamPoi	scranSumFactors
Gpx1	3dpi	-1.5641		224.601	2.9096e-06	4.86178e-05	-4.6771	-4.06217	64.2833	pseudobulk	DESeq2	LRT	glmGamPoi	scranSumFactors
Snrpn	3dpi	-0.544121		4335.23	2.91063e-06	4.86178e-05	-4.67703	-4.06217	64.279	pseudobulk	DESeq2	LRT	glmGamPoi	scranSumFactors
Npb	3dpi	-1.50373		46.4009	2.91658e-06	4.86788e-05	-4.67661	-4.06188	64.2541	pseudobulk	DESeq2	LRT	glmGamPoi	scranSumFactors
Mpst	3dpi	-1.54062		70.7867	2.92666e-06	4.88085e-05	-4.6759	-4.06126	64.2121	pseudobulk	DESeq2	LRT	glmGamPoi	scranSumFactors
Gpr146	3dpi	-1.14338		81.5663	2.94363e-06	4.90527e-05	-4.67471	-4.0601	64.1419	pseudobulk	DESeq2	LRT	glmGamPoi	scranSumFactors
Dnajc30	3dpi	-1.04912		212.534	2.95414e-06	4.91892e-05	-4.67398	-4.05945	64.0985	pseudobulk	DESeq2	LRT	glmGamPoi	scranSumFactors
Cntnap4	3dpi	0.454958		2436.07	2.9789e-06	4.95623e-05	4.67227	4.05768	63.9973	pseudobulk	DESeq2	LRT	glmGamPoi	scranSumFactors
Ctdsp1	3dpi	-1.09254		67.3735	2.98401e-06	4.95733e-05	-4.67192	-4.05763	63.9765	pseudobulk	DESeq2	LRT	glmGamPoi	scranSumFactors
Lysmd2	3dpi	-0.720198		409.471	2.98425e-06	4.95733e-05	-4.6719	-4.05763	63.9755	pseudobulk	DESeq2	LRT	glmGamPoi	scranSumFactors
Sdhd	3dpi	-0.8195		269.15	3.01964e-06	5.01089e-05	-4.66948	-4.05512	63.8327	pseudobulk	DESeq2	LRT	glmGamPoi	scranSumFactors
Kcne1l	3dpi	-2.34495		17.6082	3.02124e-06	5.01089e-05	-4.66937	-4.05512	63.8263	pseudobulk	DESeq2	LRT	glmGamPoi	scranSumFactors
2310022B05Rik	3dpi	-1.16562		264.07	3.056e-06	5.06458e-05	-4.66702	-4.05263	63.688	pseudobulk	DESeq2	LRT	glmGamPoi	scranSumFactors
Bex1	3dpi	-1.22028		971.129	3.0649e-06	5.07478e-05	-4.66642	-4.05216	63.6529	pseudobulk	DESeq2	LRT	glmGamPoi	scranSumFactors
Cav2	3dpi	-1.12222		82.1991	3.06934e-06	5.07478e-05	-4.66612	-4.05216	63.6354	pseudobulk	DESeq2	LRT	glmGamPoi	scranSumFactors
Dmac1	3dpi	-0.827881		153.106	3.06936e-06	5.07478e-05	-4.66612	-4.05216	63.6353	pseudobulk	DESeq2	LRT	glmGamPoi	scranSumFactors
Ranbp1	3dpi	-0.955931		677.041	3.07902e-06	5.08676e-05	-4.66548	-4.0516	63.5974	pseudobulk	DESeq2	LRT	glmGamPoi	scranSumFactors
Slc6a11	3dpi	-1.23177		1817.77	3.08731e-06	5.09647e-05	-4.66492	-4.05116	63.565	pseudobulk	DESeq2	LRT	glmGamPoi	scranSumFactors
Bmpr1b	3dpi	-1.37871		430.657	3.0924e-06	5.10089e-05	-4.66459	-4.05096	63.5451	pseudobulk	DESeq2	LRT	glmGamPoi	scranSumFactors
Lrrfip1	3dpi	0.413241		1986.85	3.09685e-06	5.10425e-05	4.66429	4.0508	63.5278	pseudobulk	DESeq2	LRT	glmGamPoi	scranSumFactors
Ywhae	3dpi	-0.51979		2411.36	3.09996e-06	5.10539e-05	-4.66408	-4.05075	63.5157	pseudobulk	DESeq2	LRT	glmGamPoi	scranSumFactors
Il10rb	3dpi	-1.26003		51.763	3.11854e-06	5.13199e-05	-4.66285	-4.04953	63.4437	pseudobulk	DESeq2	LRT	glmGamPoi	scranSumFactors
ND1	3dpi	-1.45764		169.726	3.12631e-06	5.14078e-05	-4.66234	-4.04913	63.4138	pseudobulk	DESeq2	LRT	glmGamPoi	scranSumFactors
Tmem47	3dpi	-0.933487		706.499	3.13884e-06	5.15737e-05	-4.66152	-4.04838	63.3656	pseudobulk	DESeq2	LRT	glmGamPoi	scranSumFactors
Wdr7	3dpi	0.354683		2137.83	3.14861e-06	5.16566e-05	4.66088	4.048	63.3283	pseudobulk	DESeq2	LRT	glmGamPoi	scranSumFactors
Ctsa	3dpi	-0.702482		323.837	3.14878e-06	5.16566e-05	-4.66087	-4.048	63.3276	pseudobulk	DESeq2	LRT	glmGamPoi	scranSumFactors
Pdss2	3dpi	0.358664		2011.5	3.15901e-06	5.17842e-05	4.6602	4.04742	63.2887	pseudobulk	DESeq2	LRT	glmGamPoi	scranSumFactors
Dpy30	3dpi	-0.59742		492.853	3.16751e-06	5.18833e-05	-4.65965	-4.04698	63.2564	pseudobulk	DESeq2	LRT	glmGamPoi	scranSumFactors
Zmat5	3dpi	-0.52757		343.39	3.18623e-06	5.21232e-05	-4.65843	-4.0459	63.1857	pseudobulk	DESeq2	LRT	glmGamPoi	scranSumFactors
Gm10635	3dpi	-1.63325		37.8206	3.18752e-06	5.21232e-05	-4.65835	-4.0459	63.1808	pseudobulk	DESeq2	LRT	glmGamPoi	scranSumFactors
Cacna1c	3dpi	0.851647		7352.79	3.18956e-06	5.21232e-05	4.65822	4.0459	63.1731	pseudobulk	DESeq2	LRT	glmGamPoi	scranSumFactors
ENSMUSG00000117410	3dpi	0.745033		281.783	3.20925e-06	5.24045e-05	4.65695	4.04464	63.0993	pseudobulk	DESeq2	LRT	glmGamPoi	scranSumFactors
Bicral	3dpi	0.434562		2187.34	3.21529e-06	5.24626e-05	4.65656	4.04438	63.0768	pseudobulk	DESeq2	LRT	glmGamPoi	scranSumFactors
Pam16	3dpi	-0.927606		278.997	3.22414e-06	5.25665e-05	-4.656	-4.04391	63.0439	pseudobulk	DESeq2	LRT	glmGamPoi	scranSumFactors
H1f2	3dpi	-0.784307		164.016	3.24056e-06	5.27933e-05	-4.65495	-4.0429	62.9831	pseudobulk	DESeq2	LRT	glmGamPoi	scranSumFactors
Ppp1r35	3dpi	-0.929903		253.875	3.25585e-06	5.30017e-05	-4.65398	-4.04198	62.9268	pseudobulk	DESeq2	LRT	glmGamPoi	scranSumFactors
Tmed2	3dpi	-0.989347		896.104	3.2586e-06	5.30055e-05	-4.65381	-4.04196	62.9167	pseudobulk	DESeq2	LRT	glmGamPoi	scranSumFactors
Rad23a	3dpi	-0.688829		532.848	3.26443e-06	5.30595e-05	-4.65344	-4.04172	62.8953	pseudobulk	DESeq2	LRT	glmGamPoi	scranSumFactors
Nmi	3dpi	-1.10566		65.0063	3.27775e-06	5.32352e-05	-4.6526	-4.04095	62.8467	pseudobulk	DESeq2	LRT	glmGamPoi	scranSumFactors
Prkar1a	3dpi	-0.644154		1328.16	3.28807e-06	5.33617e-05	-4.65195	-4.04039	62.8091	pseudobulk	DESeq2	LRT	glmGamPoi	scranSumFactors
Gm15501	3dpi	-0.9694		280.43	3.29254e-06	5.33932e-05	-4.65167	-4.04025	62.7929	pseudobulk	DESeq2	LRT	glmGamPoi	scranSumFactors
Sf3b6	3dpi	-0.750214		723.421	3.30242e-06	5.35124e-05	-4.65105	-4.03973	62.7572	pseudobulk	DESeq2	LRT	glmGamPoi	scranSumFactors
Txnl4a	3dpi	-0.675807		387.618	3.30991e-06	5.35927e-05	-4.65059	-4.03938	62.7301	pseudobulk	DESeq2	LRT	glmGamPoi	scranSumFactors
Rnf150	3dpi	0.570845		1804.12	3.32182e-06	5.37443e-05	4.64985	4.03872	62.6873	pseudobulk	DESeq2	LRT	glmGamPoi	scranSumFactors
Get3	3dpi	-0.898536		181.544	3.32702e-06	5.37872e-05	-4.64952	-4.03853	62.6687	pseudobulk	DESeq2	LRT	glmGamPoi	scranSumFactors
Lsm5	3dpi	-0.801464		194.482	3.34036e-06	5.39457e-05	-4.6487	-4.03784	62.621	pseudobulk	DESeq2	LRT	glmGamPoi	scranSumFactors
Akap17b	3dpi	0.444667		632.718	3.34193e-06	5.39457e-05	4.6486	4.03784	62.6155	pseudobulk	DESeq2	LRT	glmGamPoi	scranSumFactors
Trrap	3dpi	0.40478		1071.89	3.35666e-06	5.41133e-05	4.64769	4.03711	62.5631	pseudobulk	DESeq2	LRT	glmGamPoi	scranSumFactors
Gpr137	3dpi	-0.612145		296.146	3.35743e-06	5.41133e-05	-4.64765	-4.03711	62.5604	pseudobulk	DESeq2	LRT	glmGamPoi	scranSumFactors
Tmem60	3dpi	-0.989425		425.229	3.36115e-06	5.41285e-05	-4.64742	-4.03705	62.5472	pseudobulk	DESeq2	LRT	glmGamPoi	scranSumFactors
Kif3c	3dpi	0.374666		1100.61	3.3635e-06	5.41285e-05	4.64727	4.03705	62.5389	pseudobulk	DESeq2	LRT	glmGamPoi	scranSumFactors
Lrrc49	3dpi	0.380165		1866.31	3.36776e-06	5.41559e-05	4.64701	4.03693	62.5238	pseudobulk	DESeq2	LRT	glmGamPoi	scranSumFactors
Gm9866	3dpi	0.533777		624.64	3.37298e-06	5.4194e-05	4.64669	4.03676	62.5054	pseudobulk	DESeq2	LRT	glmGamPoi	scranSumFactors
Cnpy2	3dpi	-1.10087		569.679	3.37708e-06	5.4194e-05	-4.64644	-4.03676	62.491	pseudobulk	DESeq2	LRT	glmGamPoi	scranSumFactors
Hmgcll1	3dpi	0.392939		1987.39	3.37783e-06	5.4194e-05	4.6464	4.03676	62.4884	pseudobulk	DESeq2	LRT	glmGamPoi	scranSumFactors
Cth	3dpi	-1.2175		56.2	3.38202e-06	5.42201e-05	-4.64614	-4.03665	62.4736	pseudobulk	DESeq2	LRT	glmGamPoi	scranSumFactors
Slc25a11	3dpi	-0.903995		377.609	3.38462e-06	5.42207e-05	-4.64598	-4.03665	62.4645	pseudobulk	DESeq2	LRT	glmGamPoi	scranSumFactors
Ctsd	3dpi	-0.912416		367.546	3.397e-06	5.43777e-05	-4.64523	-4.03597	62.4211	pseudobulk	DESeq2	LRT	glmGamPoi	scranSumFactors
9130221F21Rik	3dpi	-1.80833		53.5097	3.40032e-06	5.43896e-05	-4.64503	-4.03592	62.4095	pseudobulk	DESeq2	LRT	glmGamPoi	scranSumFactors
Atg16l1	3dpi	0.403305		1019.57	3.40336e-06	5.43939e-05	4.64484	4.0359	62.3989	pseudobulk	DESeq2	LRT	glmGamPoi	scranSumFactors
Adhfe1	3dpi	-0.988376		250.833	3.40573e-06	5.43939e-05	-4.6447	-4.0359	62.3906	pseudobulk	DESeq2	LRT	glmGamPoi	scranSumFactors
Ppp1r1b	3dpi	-1.83353		28.9401	3.41249e-06	5.44469e-05	-4.64429	-4.03567	62.3671	pseudobulk	DESeq2	LRT	glmGamPoi	scranSumFactors
Nfkbib	3dpi	-0.992595		119.27	3.4142e-06	5.44469e-05	-4.64419	-4.03567	62.3611	pseudobulk	DESeq2	LRT	glmGamPoi	scranSumFactors
Iqce	3dpi	0.4391		745.227	3.42195e-06	5.44715e-05	4.64372	4.03556	62.3343	pseudobulk	DESeq2	LRT	glmGamPoi	scranSumFactors
Cystm1	3dpi	-0.707561		689.12	3.42338e-06	5.44715e-05	-4.64363	-4.03556	62.3293	pseudobulk	DESeq2	LRT	glmGamPoi	scranSumFactors
Slc13a5	3dpi	-1.4125		90.8518	3.42348e-06	5.44715e-05	-4.64363	-4.03556	62.329	pseudobulk	DESeq2	LRT	glmGamPoi	scranSumFactors
Cox7a1	3dpi	-1.87554		24.9522	3.42955e-06	5.45269e-05	-4.64326	-4.03532	62.308	pseudobulk	DESeq2	LRT	glmGamPoi	scranSumFactors
Slc41a2	3dpi	0.593936		677.248	3.4363e-06	5.45747e-05	4.64285	4.03512	62.2846	pseudobulk	DESeq2	LRT	glmGamPoi	scranSumFactors
Srebf1	3dpi	-0.807082		257.775	3.43772e-06	5.45747e-05	-4.64277	-4.03512	62.2798	pseudobulk	DESeq2	LRT	glmGamPoi	scranSumFactors
Saysd1	3dpi	-0.635198		224.663	3.47973e-06	5.51725e-05	-4.64026	-4.03256	62.136	pseudobulk	DESeq2	LRT	glmGamPoi	scranSumFactors
Camk2n1	3dpi	-0.788037		1230.5	3.48059e-06	5.51725e-05	-4.64021	-4.03256	62.133	pseudobulk	DESeq2	LRT	glmGamPoi	scranSumFactors
Cuedc2	3dpi	-0.873235		681.964	3.49138e-06	5.52811e-05	-4.63957	-4.0321	62.0964	pseudobulk	DESeq2	LRT	glmGamPoi	scranSumFactors
Trip11	3dpi	0.413577		1670.29	3.49268e-06	5.52811e-05	4.63949	4.0321	62.092	pseudobulk	DESeq2	LRT	glmGamPoi	scranSumFactors
Commd8	3dpi	-1.02115		161.839	3.51258e-06	5.55545e-05	-4.63832	-4.03094	62.0249	pseudobulk	DESeq2	LRT	glmGamPoi	scranSumFactors
Dapk3	3dpi	-0.663959		261.554	3.52098e-06	5.56457e-05	-4.63782	-4.03055	61.9967	pseudobulk	DESeq2	LRT	glmGamPoi	scranSumFactors
Cnih1	3dpi	-0.913824		531.749	3.52503e-06	5.56681e-05	-4.63759	-4.03046	61.9831	pseudobulk	DESeq2	LRT	glmGamPoi	scranSumFactors
Hmgb1	3dpi	-0.512829		2096.8	3.53477e-06	5.57598e-05	-4.63701	-4.03007	61.9506	pseudobulk	DESeq2	LRT	glmGamPoi	scranSumFactors
Abhd12	3dpi	-0.409379		1612.08	3.53611e-06	5.57598e-05	-4.63694	-4.03007	61.9461	pseudobulk	DESeq2	LRT	glmGamPoi	scranSumFactors
Bmyc	3dpi	-0.985765		889.968	3.54501e-06	5.58583e-05	-4.63642	-4.02966	61.9164	pseudobulk	DESeq2	LRT	glmGamPoi	scranSumFactors
Dusp28	3dpi	-1.14979		96.5372	3.55011e-06	5.58971e-05	-4.63612	-4.02949	61.8995	pseudobulk	DESeq2	LRT	glmGamPoi	scranSumFactors
ENSMUSG00000111593	3dpi	-0.8764		658.191	3.56526e-06	5.60938e-05	-4.63524	-4.02867	61.8493	pseudobulk	DESeq2	LRT	glmGamPoi	scranSumFactors
Suclg1	3dpi	-0.59207		863.601	3.5753e-06	5.62098e-05	-4.63466	-4.02818	61.8162	pseudobulk	DESeq2	LRT	glmGamPoi	scranSumFactors
Eif1ax	3dpi	-0.598436		343.755	3.5863e-06	5.6341e-05	-4.63402	-4.02763	61.78	pseudobulk	DESeq2	LRT	glmGamPoi	scranSumFactors
Set	3dpi	-0.930214		1001.93	3.58988e-06	5.63552e-05	-4.63381	-4.02757	61.7683	pseudobulk	DESeq2	LRT	glmGamPoi	scranSumFactors
Tmem203	3dpi	-0.936394		89.1158	3.59957e-06	5.63977e-05	-4.63326	-4.0274	61.7365	pseudobulk	DESeq2	LRT	glmGamPoi	scranSumFactors
Mmd2	3dpi	-1.16		749.504	3.6003e-06	5.63977e-05	-4.63322	-4.0274	61.7342	pseudobulk	DESeq2	LRT	glmGamPoi	scranSumFactors
Eif6	3dpi	-0.810186		219.174	3.60059e-06	5.63977e-05	-4.6332	-4.0274	61.7332	pseudobulk	DESeq2	LRT	glmGamPoi	scranSumFactors
Iqsec3	3dpi	0.507183		1005.68	3.60509e-06	5.64264e-05	4.63294	4.02728	61.7185	pseudobulk	DESeq2	LRT	glmGamPoi	scranSumFactors
Unc50	3dpi	-0.867648		480.06	3.61918e-06	5.66049e-05	-4.63213	-4.02653	61.6726	pseudobulk	DESeq2	LRT	glmGamPoi	scranSumFactors
Eif4a1	3dpi	-0.825385		864.626	3.62249e-06	5.66149e-05	-4.63194	-4.02649	61.6619	pseudobulk	DESeq2	LRT	glmGamPoi	scranSumFactors
Fbxo42	3dpi	0.434542		953.466	3.63527e-06	5.67202e-05	4.63121	4.02606	61.6205	pseudobulk	DESeq2	LRT	glmGamPoi	scranSumFactors
2310011J03Rik	3dpi	-0.867183		169.363	3.63601e-06	5.67202e-05	-4.63117	-4.02606	61.6181	pseudobulk	DESeq2	LRT	glmGamPoi	scranSumFactors
Pfdn2	3dpi	-0.873547		820.253	3.63728e-06	5.67202e-05	-4.6311	-4.02606	61.614	pseudobulk	DESeq2	LRT	glmGamPoi	scranSumFactors
Tmem250-ps	3dpi	-0.949384		109.985	3.66431e-06	5.70995e-05	-4.62957	-4.02449	61.5271	pseudobulk	DESeq2	LRT	glmGamPoi	scranSumFactors
Trappc1	3dpi	-1.06109		171.173	3.67104e-06	5.71623e-05	-4.62919	-4.02423	61.5056	pseudobulk	DESeq2	LRT	glmGamPoi	scranSumFactors
Kif5c	3dpi	0.404605		2611.29	3.67403e-06	5.71667e-05	4.62902	4.02421	61.4961	pseudobulk	DESeq2	LRT	glmGamPoi	scranSumFactors
Fbxl20	3dpi	0.400298		1840.43	3.67854e-06	5.71946e-05	4.62876	4.0241	61.4817	pseudobulk	DESeq2	LRT	glmGamPoi	scranSumFactors
Nog	3dpi	-1.47499		33.9627	3.69411e-06	5.73946e-05	-4.62789	-4.02327	61.4322	pseudobulk	DESeq2	LRT	glmGamPoi	scranSumFactors
Fgf12	3dpi	0.478324		14488.1	3.70763e-06	5.75622e-05	4.62713	4.02259	61.3894	pseudobulk	DESeq2	LRT	glmGamPoi	scranSumFactors
Spag7	3dpi	-0.946841		228.413	3.72234e-06	5.77482e-05	-4.62631	-4.02183	61.3431	pseudobulk	DESeq2	LRT	glmGamPoi	scranSumFactors
Eef1d	3dpi	-0.51098		451.624	3.72636e-06	5.77682e-05	-4.62609	-4.02175	61.3304	pseudobulk	DESeq2	LRT	glmGamPoi	scranSumFactors
Tex264	3dpi	-0.60894		442.699	3.73423e-06	5.78478e-05	-4.62565	-4.02142	61.3057	pseudobulk	DESeq2	LRT	glmGamPoi	scranSumFactors
Trib2	3dpi	-0.695979		212.853	3.74889e-06	5.79425e-05	-4.62484	-4.02104	61.2599	pseudobulk	DESeq2	LRT	glmGamPoi	scranSumFactors
Zdhhc12	3dpi	-1.02754		72.2224	3.75057e-06	5.79425e-05	-4.62475	-4.02104	61.2547	pseudobulk	DESeq2	LRT	glmGamPoi	scranSumFactors
Anxa6	3dpi	0.458166		515.063	3.75109e-06	5.79425e-05	4.62472	4.02104	61.2531	pseudobulk	DESeq2	LRT	glmGamPoi	scranSumFactors
Bola1	3dpi	-1.22144		196.518	3.75132e-06	5.79425e-05	-4.6247	-4.02104	61.2524	pseudobulk	DESeq2	LRT	glmGamPoi	scranSumFactors
Kif26b	3dpi	0.645235		1958.74	3.79573e-06	5.85857e-05	4.62226	4.01844	61.115	pseudobulk	DESeq2	LRT	glmGamPoi	scranSumFactors
Gm5641	3dpi	-2.19684		16.15	3.80248e-06	5.86221e-05	-4.6219	-4.01829	61.0943	pseudobulk	DESeq2	LRT	glmGamPoi	scranSumFactors
Tbcc	3dpi	-1.03097		177.324	3.80415e-06	5.86221e-05	-4.62181	-4.01829	61.0891	pseudobulk	DESeq2	LRT	glmGamPoi	scranSumFactors
C1galt1c1	3dpi	-0.926872		245.224	3.80641e-06	5.86221e-05	-4.62168	-4.01829	61.0822	pseudobulk	DESeq2	LRT	glmGamPoi	scranSumFactors
Eapp	3dpi	-0.591453		387.632	3.82237e-06	5.8825e-05	-4.62081	-4.01748	61.0334	pseudobulk	DESeq2	LRT	glmGamPoi	scranSumFactors
Emc4	3dpi	-0.876215		644.566	3.82963e-06	5.88938e-05	-4.62042	-4.0172	61.0113	pseudobulk	DESeq2	LRT	glmGamPoi	scranSumFactors
Fyn	3dpi	0.389577		2134.91	3.83472e-06	5.89293e-05	4.62014	4.01706	60.9959	pseudobulk	DESeq2	LRT	glmGamPoi	scranSumFactors
Cyp2j9	3dpi	-1.36375		236.618	3.85522e-06	5.91381e-05	-4.61904	-4.01622	60.9338	pseudobulk	DESeq2	LRT	glmGamPoi	scranSumFactors
Mrpl23	3dpi	-0.733198		418.748	3.85621e-06	5.91381e-05	-4.61899	-4.01622	60.9308	pseudobulk	DESeq2	LRT	glmGamPoi	scranSumFactors
Tmem176b	3dpi	-1.50624		317.469	3.85671e-06	5.91381e-05	-4.61896	-4.01622	60.9293	pseudobulk	DESeq2	LRT	glmGamPoi	scranSumFactors
Gfap	3dpi	-2.81062		53.7936	3.88119e-06	5.94703e-05	-4.61765	-4.0149	60.8557	pseudobulk	DESeq2	LRT	glmGamPoi	scranSumFactors
ENSMUSG00000087098	3dpi	-1.31054		43.26	3.91507e-06	5.99459e-05	-4.61584	-4.01302	60.7548	pseudobulk	DESeq2	LRT	glmGamPoi	scranSumFactors
Trappc5	3dpi	-0.942599		200.059	3.93177e-06	6.01331e-05	-4.61496	-4.01229	60.7054	pseudobulk	DESeq2	LRT	glmGamPoi	scranSumFactors
Aimp1	3dpi	-0.571523		634.966	3.93298e-06	6.01331e-05	-4.61489	-4.01229	60.7018	pseudobulk	DESeq2	LRT	glmGamPoi	scranSumFactors
Srsf3	3dpi	-0.465886		966.835	3.94073e-06	6.02079e-05	-4.61448	-4.01199	60.679	pseudobulk	DESeq2	LRT	glmGamPoi	scranSumFactors
Grn	3dpi	-0.797436		154.056	3.9833e-06	6.08143e-05	-4.61225	-4.00963	60.5546	pseudobulk	DESeq2	LRT	glmGamPoi	scranSumFactors
Slitrk2	3dpi	-1.06576		198.586	3.99483e-06	6.09464e-05	-4.61165	-4.00912	60.5211	pseudobulk	DESeq2	LRT	glmGamPoi	scranSumFactors
Snx17	3dpi	-0.850727		294.396	4.01367e-06	6.11896e-05	-4.61067	-4.00818	60.4667	pseudobulk	DESeq2	LRT	glmGamPoi	scranSumFactors
Fkbp1b	3dpi	-1.10284		88.3347	4.01817e-06	6.12141e-05	-4.61044	-4.00808	60.4538	pseudobulk	DESeq2	LRT	glmGamPoi	scranSumFactors
ENSMUSG00000112278	3dpi	-0.981938		78.5769	4.02289e-06	6.12418e-05	-4.6102	-4.00797	60.4402	pseudobulk	DESeq2	LRT	glmGamPoi	scranSumFactors
Ndufs2	3dpi	-0.769523		541.336	4.07578e-06	6.19314e-05	-4.60748	-4.00533	60.2894	pseudobulk	DESeq2	LRT	glmGamPoi	scranSumFactors
Scd1	3dpi	-1.06875		108.679	4.07645e-06	6.19314e-05	-4.60745	-4.00533	60.2875	pseudobulk	DESeq2	LRT	glmGamPoi	scranSumFactors
Gnal	3dpi	0.395873		1447.42	4.07698e-06	6.19314e-05	4.60742	4.00533	60.286	pseudobulk	DESeq2	LRT	glmGamPoi	scranSumFactors
Fxyd7	3dpi	-1.12245		511.409	4.09885e-06	6.22189e-05	-4.60631	-4.00423	60.2244	pseudobulk	DESeq2	LRT	glmGamPoi	scranSumFactors
Sdhaf1	3dpi	-1.16234		123.96	4.15736e-06	6.30605e-05	-4.60336	-4.00106	60.0613	pseudobulk	DESeq2	LRT	glmGamPoi	scranSumFactors
Hspa8	3dpi	-1.47042		3688.48	4.16026e-06	6.30605e-05	-4.60321	-4.00106	60.0533	pseudobulk	DESeq2	LRT	glmGamPoi	scranSumFactors
Pqbp1	3dpi	-0.81845		238.908	4.16394e-06	6.3071e-05	-4.60303	-4.00102	60.0431	pseudobulk	DESeq2	LRT	glmGamPoi	scranSumFactors
Smim7	3dpi	-0.698132		258.615	4.17032e-06	6.31225e-05	-4.60271	-4.00082	60.0255	pseudobulk	DESeq2	LRT	glmGamPoi	scranSumFactors
Fam155a	3dpi	0.512905		31394.1	4.17672e-06	6.3174e-05	4.60239	4.00063	60.0079	pseudobulk	DESeq2	LRT	glmGamPoi	scranSumFactors
Cacna1a	3dpi	0.411175		7977.7	4.18856e-06	6.33078e-05	4.6018	4.00013	59.9754	pseudobulk	DESeq2	LRT	glmGamPoi	scranSumFactors
Epas1	3dpi	-1.17295		151.821	4.19293e-06	6.33285e-05	-4.60158	-4.00005	59.9634	pseudobulk	DESeq2	LRT	glmGamPoi	scranSumFactors
Eci2	3dpi	-0.624264		322.366	4.23036e-06	6.38483e-05	-4.59973	-3.99812	59.8615	pseudobulk	DESeq2	LRT	glmGamPoi	scranSumFactors
Cd59a	3dpi	-0.728043		387.344	4.26599e-06	6.43e-05	-4.59798	-3.99645	59.7654	pseudobulk	DESeq2	LRT	glmGamPoi	scranSumFactors
Dync1i1	3dpi	0.394709		4503.18	4.26638e-06	6.43e-05	4.59796	3.99645	59.7644	pseudobulk	DESeq2	LRT	glmGamPoi	scranSumFactors
Rpl36a-ps1	3dpi	-1.47568		45.6875	4.27016e-06	6.43111e-05	-4.59778	-3.99641	59.7542	pseudobulk	DESeq2	LRT	glmGamPoi	scranSumFactors
Gtf3a	3dpi	-0.838106		113.545	4.28062e-06	6.43874e-05	-4.59727	-3.99613	59.7262	pseudobulk	DESeq2	LRT	glmGamPoi	scranSumFactors
Pcsk1n	3dpi	-1.27914		12127.7	4.28132e-06	6.43874e-05	-4.59724	-3.99613	59.7244	pseudobulk	DESeq2	LRT	glmGamPoi	scranSumFactors
Rdm1	3dpi	-0.991929		76.0696	4.28615e-06	6.44141e-05	-4.597	-3.99603	59.7115	pseudobulk	DESeq2	LRT	glmGamPoi	scranSumFactors
Tln1	3dpi	-0.622315		382.211	4.29305e-06	6.44351e-05	-4.59667	-3.99595	59.6931	pseudobulk	DESeq2	LRT	glmGamPoi	scranSumFactors
Bsn	3dpi	0.671329		1198.31	4.29621e-06	6.44351e-05	4.59651	3.99595	59.6847	pseudobulk	DESeq2	LRT	glmGamPoi	scranSumFactors
Cct5	3dpi	-0.957303		504.749	4.29669e-06	6.44351e-05	-4.59649	-3.99595	59.6834	pseudobulk	DESeq2	LRT	glmGamPoi	scranSumFactors
Dnajc19	3dpi	-0.581479		819.103	4.33212e-06	6.49203e-05	-4.59478	-3.99417	59.5896	pseudobulk	DESeq2	LRT	glmGamPoi	scranSumFactors
Hnrnpf	3dpi	-0.44545		552.504	4.3427e-06	6.50328e-05	-4.59427	-3.99376	59.5617	pseudobulk	DESeq2	LRT	glmGamPoi	scranSumFactors
Eid2	3dpi	-1.26606		337.072	4.35113e-06	6.51128e-05	-4.59386	-3.99347	59.5396	pseudobulk	DESeq2	LRT	glmGamPoi	scranSumFactors
Bet1l	3dpi	-0.842814		215.492	4.37093e-06	6.53628e-05	-4.59292	-3.99256	59.4878	pseudobulk	DESeq2	LRT	glmGamPoi	scranSumFactors
Ank3	3dpi	0.416445		19396.8	4.37845e-06	6.5429e-05	4.59256	3.99232	59.4682	pseudobulk	DESeq2	LRT	glmGamPoi	scranSumFactors
B230219D22Rik	3dpi	-0.545157		890.733	4.3852e-06	6.54836e-05	-4.59224	-3.99213	59.4506	pseudobulk	DESeq2	LRT	glmGamPoi	scranSumFactors
Pcif1	3dpi	-0.525434		348.639	4.39289e-06	6.55522e-05	-4.59187	-3.99188	59.4307	pseudobulk	DESeq2	LRT	glmGamPoi	scranSumFactors
Scamp3	3dpi	-0.82217		299.607	4.404e-06	6.56716e-05	-4.59134	-3.99145	59.4019	pseudobulk	DESeq2	LRT	glmGamPoi	scranSumFactors
Sri	3dpi	-0.703777		338.718	4.41487e-06	6.57872e-05	-4.59083	-3.99103	59.3738	pseudobulk	DESeq2	LRT	glmGamPoi	scranSumFactors
Gm19522	3dpi	-1.11259		278.693	4.44736e-06	6.62246e-05	-4.5893	-3.98946	59.2904	pseudobulk	DESeq2	LRT	glmGamPoi	scranSumFactors
Chmp4b	3dpi	-0.525736		847.351	4.45529e-06	6.6296e-05	-4.58893	-3.9892	59.2702	pseudobulk	DESeq2	LRT	glmGamPoi	scranSumFactors
Tmem33	3dpi	-0.681635		414.759	4.46096e-06	6.63337e-05	-4.58866	-3.98907	59.2557	pseudobulk	DESeq2	LRT	glmGamPoi	scranSumFactors
ENSMUSG00000097644	3dpi	-1.13783		134.145	4.4786e-06	6.65204e-05	-4.58784	-3.9884	59.2109	pseudobulk	DESeq2	LRT	glmGamPoi	scranSumFactors
Cct7	3dpi	-0.962723		612.564	4.47982e-06	6.65204e-05	-4.58778	-3.9884	59.2078	pseudobulk	DESeq2	LRT	glmGamPoi	scranSumFactors
Lsm7	3dpi	-0.778272		815.386	4.49743e-06	6.67351e-05	-4.58696	-3.98764	59.1632	pseudobulk	DESeq2	LRT	glmGamPoi	scranSumFactors
Dscam	3dpi	0.430998		11839	4.50078e-06	6.67379e-05	4.58681	3.98763	59.1548	pseudobulk	DESeq2	LRT	glmGamPoi	scranSumFactors
Cox6a2	3dpi	-1.73523		55.8608	4.52593e-06	6.70428e-05	-4.58564	-3.98654	59.0916	pseudobulk	DESeq2	LRT	glmGamPoi	scranSumFactors
Yeats4	3dpi	-0.763464		193.353	4.52769e-06	6.70428e-05	-4.58556	-3.98654	59.0872	pseudobulk	DESeq2	LRT	glmGamPoi	scranSumFactors
Map3k13	3dpi	0.421694		1043.9	4.58542e-06	6.78226e-05	4.58291	3.9838	58.9437	pseudobulk	DESeq2	LRT	glmGamPoi	scranSumFactors
Cope	3dpi	-0.733321		642.184	4.58677e-06	6.78226e-05	-4.58285	-3.9838	58.9403	pseudobulk	DESeq2	LRT	glmGamPoi	scranSumFactors
Hnmt	3dpi	-0.688586		275.747	4.5917e-06	6.7848e-05	-4.58263	-3.98371	58.9282	pseudobulk	DESeq2	LRT	glmGamPoi	scranSumFactors
Ndufaf8	3dpi	-1.17574		177.562	4.60041e-06	6.79292e-05	-4.58223	-3.98342	58.9068	pseudobulk	DESeq2	LRT	glmGamPoi	scranSumFactors
Phkg1	3dpi	-0.92116		849.488	4.6303e-06	6.83227e-05	-4.58088	-3.98205	58.8336	pseudobulk	DESeq2	LRT	glmGamPoi	scranSumFactors
Nup210	3dpi	0.491888		466.198	4.65527e-06	6.86433e-05	4.57975	3.98094	58.7728	pseudobulk	DESeq2	LRT	glmGamPoi	scranSumFactors
Commd5	3dpi	-1.31469		41.0177	4.66697e-06	6.87678e-05	-4.57923	-3.98051	58.7445	pseudobulk	DESeq2	LRT	glmGamPoi	scranSumFactors
Smim20	3dpi	-0.614643		228.094	4.67667e-06	6.88627e-05	-4.57879	-3.98018	58.7211	pseudobulk	DESeq2	LRT	glmGamPoi	scranSumFactors
Tspyl4	3dpi	-0.96166		1529.45	4.69758e-06	6.91224e-05	-4.57786	-3.97929	58.6708	pseudobulk	DESeq2	LRT	glmGamPoi	scranSumFactors
Osbpl6	3dpi	0.377729		4043.43	4.7786e-06	7.02656e-05	4.57428	3.97538	58.4784	pseudobulk	DESeq2	LRT	glmGamPoi	scranSumFactors
Irgm1	3dpi	-1.4562		32.8673	4.79538e-06	7.04634e-05	-4.57355	-3.97472	58.439	pseudobulk	DESeq2	LRT	glmGamPoi	scranSumFactors
Scn2a	3dpi	0.397988		4497.73	4.80267e-06	7.05215e-05	4.57323	3.97452	58.4219	pseudobulk	DESeq2	LRT	glmGamPoi	scranSumFactors
Gm12185	3dpi	-1.36082		37.9174	4.82126e-06	7.07452e-05	-4.57242	-3.97377	58.3785	pseudobulk	DESeq2	LRT	glmGamPoi	scranSumFactors
Adcy5	3dpi	0.461833		820.296	4.83726e-06	7.09308e-05	4.57172	3.97314	58.3414	pseudobulk	DESeq2	LRT	glmGamPoi	scranSumFactors
Syne1	3dpi	0.389194		7100.59	4.85321e-06	7.10793e-05	4.57103	3.97264	58.3044	pseudobulk	DESeq2	LRT	glmGamPoi	scranSumFactors
Dclk2	3dpi	0.46391		1904.07	4.85604e-06	7.10793e-05	4.57091	3.97264	58.2979	pseudobulk	DESeq2	LRT	glmGamPoi	scranSumFactors
Tap2	3dpi	-0.890393		95.9568	4.86415e-06	7.10793e-05	-4.57056	-3.97264	58.2792	pseudobulk	DESeq2	LRT	glmGamPoi	scranSumFactors
ENSMUSG00000030068	3dpi	0.446902		1868.52	4.86611e-06	7.10793e-05	4.57048	3.97264	58.2747	pseudobulk	DESeq2	LRT	glmGamPoi	scranSumFactors
ENSMUSG00000021871	3dpi	-1.2609		45.123	4.86722e-06	7.10793e-05	-4.57043	-3.97264	58.2721	pseudobulk	DESeq2	LRT	glmGamPoi	scranSumFactors
Pura	3dpi	-0.493215		2286.96	4.86757e-06	7.10793e-05	-4.57042	-3.97264	58.2713	pseudobulk	DESeq2	LRT	glmGamPoi	scranSumFactors
Vps53	3dpi	0.341136		1342.81	4.88657e-06	7.13075e-05	4.5696	3.97188	58.2277	pseudobulk	DESeq2	LRT	glmGamPoi	scranSumFactors
Gpr62	3dpi	-1.00934		91.9773	4.9513e-06	7.22021e-05	-4.56684	-3.96891	58.0805	pseudobulk	DESeq2	LRT	glmGamPoi	scranSumFactors
Ttc21b	3dpi	0.394759		804.342	4.96184e-06	7.22712e-05	4.56639	3.96868	58.0567	pseudobulk	DESeq2	LRT	glmGamPoi	scranSumFactors
U2af1	3dpi	-0.482572		845.715	4.96287e-06	7.22712e-05	-4.56635	-3.96868	58.0544	pseudobulk	DESeq2	LRT	glmGamPoi	scranSumFactors
Bcan	3dpi	-1.02553		998.11	4.97645e-06	7.2419e-05	-4.56578	-3.9682	58.0239	pseudobulk	DESeq2	LRT	glmGamPoi	scranSumFactors
Mlf2	3dpi	-0.653816		1042.6	4.9892e-06	7.24922e-05	-4.56524	-3.96795	57.9953	pseudobulk	DESeq2	LRT	glmGamPoi	scranSumFactors
Calb2	3dpi	-1.50252		834.999	4.9911e-06	7.24922e-05	-4.56516	-3.96795	57.9911	pseudobulk	DESeq2	LRT	glmGamPoi	scranSumFactors
Plec	3dpi	0.474787		669.918	4.9948e-06	7.24922e-05	4.56501	3.96795	57.9828	pseudobulk	DESeq2	LRT	glmGamPoi	scranSumFactors
Clip1	3dpi	0.334519		2219.72	4.99521e-06	7.24922e-05	4.56499	3.96795	57.9819	pseudobulk	DESeq2	LRT	glmGamPoi	scranSumFactors
Rpl5	3dpi	-0.602389		560.918	5.00689e-06	7.26119e-05	-4.5645	-3.96756	57.9558	pseudobulk	DESeq2	LRT	glmGamPoi	scranSumFactors
Mapk3	3dpi	-0.78272		295.168	5.01116e-06	7.2621e-05	-4.56432	-3.96753	57.9463	pseudobulk	DESeq2	LRT	glmGamPoi	scranSumFactors
Lhfpl4	3dpi	0.416342		641.704	5.01439e-06	7.2621e-05	4.56418	3.96753	57.9391	pseudobulk	DESeq2	LRT	glmGamPoi	scranSumFactors
Coprs	3dpi	-1.07346		326.838	5.02353e-06	7.27036e-05	-4.5638	-3.96726	57.9188	pseudobulk	DESeq2	LRT	glmGamPoi	scranSumFactors
Slc39a12	3dpi	-1.45005		699.609	5.04811e-06	7.2994e-05	-4.56278	-3.96631	57.8644	pseudobulk	DESeq2	LRT	glmGamPoi	scranSumFactors
Rps27a-ps3	3dpi	-0.747938		374.483	5.05051e-06	7.2994e-05	-4.56268	-3.96631	57.8591	pseudobulk	DESeq2	LRT	glmGamPoi	scranSumFactors
Mapk14	3dpi	0.46779		1086.66	5.08876e-06	7.34966e-05	4.56109	3.96467	57.7751	pseudobulk	DESeq2	LRT	glmGamPoi	scranSumFactors
4932431P20Rik	3dpi	-1.5646		28.1316	5.09938e-06	7.35997e-05	-4.56066	-3.96434	57.7519	pseudobulk	DESeq2	LRT	glmGamPoi	scranSumFactors
Asf1a	3dpi	-0.851084		134.612	5.11264e-06	7.37406e-05	-4.56011	-3.96388	57.7231	pseudobulk	DESeq2	LRT	glmGamPoi	scranSumFactors
Pkd1	3dpi	0.410871		1678.3	5.1197e-06	7.37921e-05	4.55982	3.96372	57.7077	pseudobulk	DESeq2	LRT	glmGamPoi	scranSumFactors
Polr2g	3dpi	-0.823003		419.868	5.13074e-06	7.39008e-05	-4.55937	-3.96336	57.6838	pseudobulk	DESeq2	LRT	glmGamPoi	scranSumFactors
Nubp2	3dpi	-1.2247		48.1053	5.13712e-06	7.39111e-05	-4.55911	-3.96333	57.67	pseudobulk	DESeq2	LRT	glmGamPoi	scranSumFactors
Rnf181	3dpi	-0.484052		389.312	5.13866e-06	7.39111e-05	-4.55905	-3.96333	57.6667	pseudobulk	DESeq2	LRT	glmGamPoi	scranSumFactors
Ap5s1	3dpi	-1.14709		76.7554	5.14195e-06	7.39111e-05	-4.55891	-3.96333	57.6596	pseudobulk	DESeq2	LRT	glmGamPoi	scranSumFactors
Scn8a	3dpi	0.458894		2942.73	5.14598e-06	7.39187e-05	4.55875	3.96331	57.6509	pseudobulk	DESeq2	LRT	glmGamPoi	scranSumFactors
Wdr11	3dpi	0.486353		406.518	5.15459e-06	7.39922e-05	4.5584	3.96307	57.6323	pseudobulk	DESeq2	LRT	glmGamPoi	scranSumFactors
Vim	3dpi	-1.82826		57.8284	5.16713e-06	7.41218e-05	-4.55789	-3.96265	57.6053	pseudobulk	DESeq2	LRT	glmGamPoi	scranSumFactors
Cst6	3dpi	-1.50316		48.8366	5.17317e-06	7.41477e-05	-4.55764	-3.96257	57.5923	pseudobulk	DESeq2	LRT	glmGamPoi	scranSumFactors
Eif3g	3dpi	-0.935623		240.193	5.17595e-06	7.41477e-05	-4.55753	-3.96257	57.5864	pseudobulk	DESeq2	LRT	glmGamPoi	scranSumFactors
2700054A10Rik	3dpi	0.507814		760.138	5.18311e-06	7.41587e-05	4.55724	3.96253	57.571	pseudobulk	DESeq2	LRT	glmGamPoi	scranSumFactors
Kcnk10	3dpi	0.422525		1045.74	5.18535e-06	7.41587e-05	4.55715	3.96253	57.5663	pseudobulk	DESeq2	LRT	glmGamPoi	scranSumFactors
Uchl1	3dpi	-0.967487		3300.53	5.18725e-06	7.41587e-05	-4.55707	-3.96253	57.5622	pseudobulk	DESeq2	LRT	glmGamPoi	scranSumFactors
Aamp	3dpi	-0.812728		439.975	5.19783e-06	7.42597e-05	-4.55664	-3.96221	57.5396	pseudobulk	DESeq2	LRT	glmGamPoi	scranSumFactors
Dynll2	3dpi	-0.832431		1105.28	5.20722e-06	7.43436e-05	-4.55626	-3.96194	57.5196	pseudobulk	DESeq2	LRT	glmGamPoi	scranSumFactors
Cnbp	3dpi	-0.60218		923.021	5.23318e-06	7.46638e-05	-4.55522	-3.96091	57.4645	pseudobulk	DESeq2	LRT	glmGamPoi	scranSumFactors
St3gal3	3dpi	0.406164		1637.72	5.26538e-06	7.50725e-05	4.55393	3.95961	57.3966	pseudobulk	DESeq2	LRT	glmGamPoi	scranSumFactors
Trp53i13	3dpi	-0.880907		155.645	5.27575e-06	7.51697e-05	-4.55351	-3.9593	57.3748	pseudobulk	DESeq2	LRT	glmGamPoi	scranSumFactors
Rps23-ps1	3dpi	-0.841383		279.204	5.28017e-06	7.5182e-05	-4.55334	-3.95926	57.3655	pseudobulk	DESeq2	LRT	glmGamPoi	scranSumFactors
Avpi1	3dpi	-1.15221		99.3656	5.2863e-06	7.52185e-05	-4.55309	-3.95915	57.3527	pseudobulk	DESeq2	LRT	glmGamPoi	scranSumFactors
Blvrb	3dpi	-0.876162		96.1679	5.30124e-06	7.53804e-05	-4.5525	-3.95863	57.3215	pseudobulk	DESeq2	LRT	glmGamPoi	scranSumFactors
Gemin7	3dpi	-0.852777		209.2	5.3184e-06	7.55734e-05	-4.55182	-3.95802	57.2858	pseudobulk	DESeq2	LRT	glmGamPoi	scranSumFactors
Pigx	3dpi	-0.612294		328.039	5.33514e-06	7.57533e-05	-4.55116	-3.95745	57.2511	pseudobulk	DESeq2	LRT	glmGamPoi	scranSumFactors
Snapin	3dpi	-0.887412		284.995	5.33823e-06	7.57533e-05	-4.55104	-3.95745	57.2447	pseudobulk	DESeq2	LRT	glmGamPoi	scranSumFactors
Ppp2r5a	3dpi	-0.696482		652.703	5.34971e-06	7.58323e-05	-4.55058	-3.9572	57.221	pseudobulk	DESeq2	LRT	glmGamPoi	scranSumFactors
Nenf	3dpi	-1.10073		1393.45	5.35097e-06	7.58323e-05	-4.55054	-3.9572	57.2184	pseudobulk	DESeq2	LRT	glmGamPoi	scranSumFactors
Gde1	3dpi	-0.6886		914.112	5.35484e-06	7.58364e-05	-4.55038	-3.95719	57.2104	pseudobulk	DESeq2	LRT	glmGamPoi	scranSumFactors
Snrnp25	3dpi	-1.1409		91.5086	5.3637e-06	7.59108e-05	-4.55004	-3.95696	57.1922	pseudobulk	DESeq2	LRT	glmGamPoi	scranSumFactors
Aif1l	3dpi	-1.41978		33.9	5.3901e-06	7.61967e-05	-4.549	-3.95606	57.138	pseudobulk	DESeq2	LRT	glmGamPoi	scranSumFactors
Fh1	3dpi	-0.787076		306.777	5.39111e-06	7.61967e-05	-4.54896	-3.95606	57.136	pseudobulk	DESeq2	LRT	glmGamPoi	scranSumFactors
Ucma	3dpi	-1.82671		20.5919	5.41073e-06	7.64229e-05	-4.5482	-3.95535	57.0959	pseudobulk	DESeq2	LRT	glmGamPoi	scranSumFactors
1110004F10Rik	3dpi	-0.587667		816.598	5.41654e-06	7.64539e-05	-4.54797	-3.95525	57.0841	pseudobulk	DESeq2	LRT	glmGamPoi	scranSumFactors
Psme1	3dpi	-1.23054		327.05	5.45022e-06	7.68384e-05	-4.54667	-3.95405	57.0159	pseudobulk	DESeq2	LRT	glmGamPoi	scranSumFactors
Rpl13a	3dpi	-0.94056		661.515	5.45106e-06	7.68384e-05	-4.54663	-3.95405	57.0142	pseudobulk	DESeq2	LRT	glmGamPoi	scranSumFactors
Ankra2	3dpi	-0.579983		428.326	5.46066e-06	7.69225e-05	-4.54626	-3.95379	56.9948	pseudobulk	DESeq2	LRT	glmGamPoi	scranSumFactors
Selenbp1	3dpi	-1.19806		71.5975	5.47669e-06	7.7097e-05	-4.54565	-3.95325	56.9626	pseudobulk	DESeq2	LRT	glmGamPoi	scranSumFactors
Tcp1	3dpi	-0.659238		655.757	5.49371e-06	7.7285e-05	-4.54499	-3.95267	56.9285	pseudobulk	DESeq2	LRT	glmGamPoi	scranSumFactors
Mki67	3dpi	-1.32731		49.1784	5.50675e-06	7.74033e-05	-4.54449	-3.9523	56.9024	pseudobulk	DESeq2	LRT	glmGamPoi	scranSumFactors
Trim34a	3dpi	-1.62384		25.9125	5.51123e-06	7.74033e-05	-4.54432	-3.9523	56.8935	pseudobulk	DESeq2	LRT	glmGamPoi	scranSumFactors
Selenot	3dpi	-0.537411		631.934	5.51585e-06	7.74033e-05	-4.54415	-3.9523	56.8843	pseudobulk	DESeq2	LRT	glmGamPoi	scranSumFactors
Ric8b	3dpi	0.405531		1108.27	5.51677e-06	7.74033e-05	4.54411	3.9523	56.8825	pseudobulk	DESeq2	LRT	glmGamPoi	scranSumFactors
Tusc2	3dpi	-1.15279		216.852	5.52776e-06	7.74656e-05	-4.54369	-3.95211	56.8606	pseudobulk	DESeq2	LRT	glmGamPoi	scranSumFactors
Cyhr1	3dpi	-0.667148		773.907	5.52855e-06	7.74656e-05	-4.54366	-3.95211	56.8591	pseudobulk	DESeq2	LRT	glmGamPoi	scranSumFactors
Pop5	3dpi	-0.779566		516.573	5.54032e-06	7.75792e-05	-4.54321	-3.95176	56.8357	pseudobulk	DESeq2	LRT	glmGamPoi	scranSumFactors
Mrps23	3dpi	-0.935541		179.835	5.56489e-06	7.78716e-05	-4.54228	-3.95086	56.7872	pseudobulk	DESeq2	LRT	glmGamPoi	scranSumFactors
Zcchc14	3dpi	0.436017		914.989	5.58654e-06	7.80952e-05	4.54146	3.95017	56.7446	pseudobulk	DESeq2	LRT	glmGamPoi	scranSumFactors
Zfp36l2	3dpi	-1.01808		94.8665	5.58826e-06	7.80952e-05	-4.5414	-3.95017	56.7412	pseudobulk	DESeq2	LRT	glmGamPoi	scranSumFactors
ENSMUSG00000087199	3dpi	-1.26084		133.209	5.60285e-06	7.82473e-05	-4.54085	-3.94971	56.7127	pseudobulk	DESeq2	LRT	glmGamPoi	scranSumFactors
Slc25a39	3dpi	-1.00599		235.173	5.60895e-06	7.82808e-05	-4.54062	-3.9496	56.7007	pseudobulk	DESeq2	LRT	glmGamPoi	scranSumFactors
B430010I23Rik	3dpi	-0.82226		249.68	5.61573e-06	7.83236e-05	-4.54036	-3.94947	56.6875	pseudobulk	DESeq2	LRT	glmGamPoi	scranSumFactors
Ak1	3dpi	-0.797102		233.531	5.64517e-06	7.86823e-05	-4.53926	-3.94838	56.6303	pseudobulk	DESeq2	LRT	glmGamPoi	scranSumFactors
Idh3a	3dpi	-0.702552		502.531	5.65386e-06	7.87516e-05	-4.53894	-3.94817	56.6134	pseudobulk	DESeq2	LRT	glmGamPoi	scranSumFactors
Snapc5	3dpi	-0.737261		182.399	5.66586e-06	7.88666e-05	-4.53849	-3.94782	56.5903	pseudobulk	DESeq2	LRT	glmGamPoi	scranSumFactors
Kank1	3dpi	-1.02994		489.223	5.68702e-06	7.91091e-05	-4.5377	-3.94708	56.5495	pseudobulk	DESeq2	LRT	glmGamPoi	scranSumFactors
Shank1	3dpi	0.333677		1551.36	5.70379e-06	7.92806e-05	4.53708	3.94656	56.5173	pseudobulk	DESeq2	LRT	glmGamPoi	scranSumFactors
Ngdn	3dpi	-0.661507		232.389	5.70685e-06	7.92806e-05	-4.53697	-3.94656	56.5115	pseudobulk	DESeq2	LRT	glmGamPoi	scranSumFactors
Nav2	3dpi	0.48414		8020.66	5.71106e-06	7.92869e-05	4.53681	3.94655	56.5034	pseudobulk	DESeq2	LRT	glmGamPoi	scranSumFactors
Cyp2d22	3dpi	-1.35826		132.802	5.72997e-06	7.94559e-05	-4.53612	-3.94604	56.4673	pseudobulk	DESeq2	LRT	glmGamPoi	scranSumFactors
Mzt2	3dpi	-1.05093		121.546	5.73075e-06	7.94559e-05	-4.53609	-3.94604	56.4658	pseudobulk	DESeq2	LRT	glmGamPoi	scranSumFactors
St7	3dpi	0.351905		2147.23	5.73836e-06	7.94999e-05	4.53581	3.9459	56.4514	pseudobulk	DESeq2	LRT	glmGamPoi	scranSumFactors
Atp2b2	3dpi	0.401888		3632.07	5.74145e-06	7.94999e-05	4.53569	3.9459	56.4455	pseudobulk	DESeq2	LRT	glmGamPoi	scranSumFactors
ENSMUSG00000057580	3dpi	-0.934936		81.0297	5.76511e-06	7.97368e-05	-4.53483	-3.94519	56.4006	pseudobulk	DESeq2	LRT	glmGamPoi	scranSumFactors
Ldha	3dpi	-1.0984		483.323	5.76796e-06	7.97368e-05	-4.53472	-3.94519	56.3952	pseudobulk	DESeq2	LRT	glmGamPoi	scranSumFactors
Cdc42ep2	3dpi	-1.13651		136.573	5.76988e-06	7.97368e-05	-4.53465	-3.94519	56.3916	pseudobulk	DESeq2	LRT	glmGamPoi	scranSumFactors
ENSMUSG00000070574	3dpi	-1.19476		49.4675	5.7792e-06	7.98134e-05	-4.53431	-3.94496	56.374	pseudobulk	DESeq2	LRT	glmGamPoi	scranSumFactors
Mrpl15	3dpi	-0.62593		396.326	5.79519e-06	7.99819e-05	-4.53373	-3.94445	56.3439	pseudobulk	DESeq2	LRT	glmGamPoi	scranSumFactors
Rab1b	3dpi	-0.664359		186.244	5.83349e-06	8.041e-05	-4.53234	-3.94317	56.2722	pseudobulk	DESeq2	LRT	glmGamPoi	scranSumFactors
Sf3a2	3dpi	-0.947689		145.425	5.83381e-06	8.041e-05	-4.53232	-3.94317	56.2716	pseudobulk	DESeq2	LRT	glmGamPoi	scranSumFactors
ENSMUSG00000090117	3dpi	-0.870618		255.779	5.84044e-06	8.04488e-05	-4.53208	-3.94306	56.2592	pseudobulk	DESeq2	LRT	glmGamPoi	scranSumFactors
Aimp2	3dpi	-1.03837		132.1	5.85065e-06	8.0537e-05	-4.53172	-3.9428	56.2402	pseudobulk	DESeq2	LRT	glmGamPoi	scranSumFactors
Evi2a	3dpi	-1.48072		105.041	5.87955e-06	8.08495e-05	-4.53068	-3.94187	56.1866	pseudobulk	DESeq2	LRT	glmGamPoi	scranSumFactors
4930581F22Rik	3dpi	-0.710301		335.4	5.88101e-06	8.08495e-05	-4.53062	-3.94187	56.1839	pseudobulk	DESeq2	LRT	glmGamPoi	scranSumFactors
Cops8	3dpi	-0.642025		483.721	5.90038e-06	8.10631e-05	-4.52993	-3.94124	56.1482	pseudobulk	DESeq2	LRT	glmGamPoi	scranSumFactors
Nat8	3dpi	-2.71168		16.5637	5.93161e-06	8.14392e-05	-4.52881	-3.94012	56.0909	pseudobulk	DESeq2	LRT	glmGamPoi	scranSumFactors
Parp3	3dpi	-1.64579		43.7358	5.96266e-06	8.18123e-05	-4.52771	-3.93903	56.0342	pseudobulk	DESeq2	LRT	glmGamPoi	scranSumFactors
Ado	3dpi	-0.937806		144.98	5.98777e-06	8.21035e-05	-4.52682	-3.93818	55.9887	pseudobulk	DESeq2	LRT	glmGamPoi	scranSumFactors
Gm7135	3dpi	-0.923011		233.251	5.99395e-06	8.21349e-05	-4.5266	-3.93808	55.9775	pseudobulk	DESeq2	LRT	glmGamPoi	scranSumFactors
Slc7a11	3dpi	-1.7022		796.496	6.03505e-06	8.26446e-05	-4.52516	-3.9366	55.9035	pseudobulk	DESeq2	LRT	glmGamPoi	scranSumFactors
B230311B06Rik	3dpi	-2.40178		13.8003	6.05878e-06	8.28715e-05	-4.52433	-3.93594	55.861	pseudobulk	DESeq2	LRT	glmGamPoi	scranSumFactors
Ankrd10	3dpi	0.477411		1099.58	6.06216e-06	8.28715e-05	4.52421	3.93594	55.855	pseudobulk	DESeq2	LRT	glmGamPoi	scranSumFactors
Rpl23a-ps3	3dpi	-1.07932		86.0489	6.06458e-06	8.28715e-05	-4.52413	-3.93594	55.8507	pseudobulk	DESeq2	LRT	glmGamPoi	scranSumFactors
Cyc1	3dpi	-0.975491		918.887	6.06906e-06	8.28715e-05	-4.52397	-3.93594	55.8427	pseudobulk	DESeq2	LRT	glmGamPoi	scranSumFactors
Fbll1	3dpi	-1.26209		248.06	6.07123e-06	8.28715e-05	-4.52389	-3.93594	55.8388	pseudobulk	DESeq2	LRT	glmGamPoi	scranSumFactors
Mif4gd	3dpi	-0.956291		160.364	6.09721e-06	8.31724e-05	-4.52299	-3.93507	55.7927	pseudobulk	DESeq2	LRT	glmGamPoi	scranSumFactors
ENSMUSG00000098720	3dpi	-1.65835		50.4027	6.1018e-06	8.31813e-05	-4.52283	-3.93504	55.7845	pseudobulk	DESeq2	LRT	glmGamPoi	scranSumFactors
Snrpd1	3dpi	-0.764475		632.747	6.10837e-06	8.32172e-05	-4.5226	-3.93494	55.7729	pseudobulk	DESeq2	LRT	glmGamPoi	scranSumFactors
Mrpl58	3dpi	-0.6621		393.721	6.11263e-06	8.32216e-05	-4.52246	-3.93493	55.7654	pseudobulk	DESeq2	LRT	glmGamPoi	scranSumFactors
Ppip5k1	3dpi	0.366737		1529.68	6.14439e-06	8.36002e-05	4.52136	3.93384	55.7094	pseudobulk	DESeq2	LRT	glmGamPoi	scranSumFactors
0610010K14Rik	3dpi	-1.11984		93.3096	6.16226e-06	8.37373e-05	-4.52074	-3.93344	55.6781	pseudobulk	DESeq2	LRT	glmGamPoi	scranSumFactors
Evi2	3dpi	-0.935475		286.599	6.1624e-06	8.37373e-05	-4.52074	-3.93344	55.6778	pseudobulk	DESeq2	LRT	glmGamPoi	scranSumFactors
Pdcd6	3dpi	-0.652629		396.187	6.16792e-06	8.37585e-05	-4.52055	-3.93338	55.6682	pseudobulk	DESeq2	LRT	glmGamPoi	scranSumFactors
Fbxo9	3dpi	-0.494978		653.845	6.19714e-06	8.41013e-05	-4.51955	-3.9324	55.6172	pseudobulk	DESeq2	LRT	glmGamPoi	scranSumFactors
Atraid	3dpi	-0.729724		1070.03	6.20202e-06	8.41134e-05	-4.51938	-3.93237	55.6087	pseudobulk	DESeq2	LRT	glmGamPoi	scranSumFactors
Tmem230	3dpi	-0.644094		253.226	6.21359e-06	8.42163e-05	-4.51899	-3.93207	55.5887	pseudobulk	DESeq2	LRT	glmGamPoi	scranSumFactors
Cend1	3dpi	-1.10356		646.183	6.24858e-06	8.46059e-05	-4.5178	-3.93096	55.5282	pseudobulk	DESeq2	LRT	glmGamPoi	scranSumFactors
Rnf217	3dpi	0.440738		1008.5	6.25035e-06	8.46059e-05	4.51774	3.93096	55.5251	pseudobulk	DESeq2	LRT	glmGamPoi	scranSumFactors
Cenpx	3dpi	-0.804508		158.104	6.28617e-06	8.50363e-05	-4.51653	-3.92974	55.4637	pseudobulk	DESeq2	LRT	glmGamPoi	scranSumFactors
Sf3b4	3dpi	-0.929332		150.357	6.30355e-06	8.51784e-05	-4.51594	-3.92934	55.434	pseudobulk	DESeq2	LRT	glmGamPoi	scranSumFactors
Sfpq	3dpi	0.304174		3013.33	6.30779e-06	8.51784e-05	4.5158	3.92934	55.4267	pseudobulk	DESeq2	LRT	glmGamPoi	scranSumFactors
Rnf13	3dpi	-0.518589		1490.87	6.30876e-06	8.51784e-05	-4.51577	-3.92934	55.4251	pseudobulk	DESeq2	LRT	glmGamPoi	scranSumFactors
Vamp5	3dpi	-1.70443		69.3081	6.32174e-06	8.52579e-05	-4.51533	-3.92912	55.403	pseudobulk	DESeq2	LRT	glmGamPoi	scranSumFactors
Ints10	3dpi	0.443525		745.977	6.32272e-06	8.52579e-05	4.5153	3.92912	55.4013	pseudobulk	DESeq2	LRT	glmGamPoi	scranSumFactors
Pdgfrb	3dpi	-1.88716		137.069	6.36948e-06	8.58336e-05	-4.51374	-3.9275	55.3222	pseudobulk	DESeq2	LRT	glmGamPoi	scranSumFactors
Kcnb1	3dpi	0.517621		880.785	6.38065e-06	8.59293e-05	4.51337	3.92723	55.3034	pseudobulk	DESeq2	LRT	glmGamPoi	scranSumFactors
Adam23	3dpi	0.419466		3302.18	6.38861e-06	8.59742e-05	4.5131	3.92711	55.2901	pseudobulk	DESeq2	LRT	glmGamPoi	scranSumFactors
Cyp4f14	3dpi	-1.54238		27.6023	6.39212e-06	8.59742e-05	-4.51299	-3.92711	55.2842	pseudobulk	DESeq2	LRT	glmGamPoi	scranSumFactors
Ap1b1	3dpi	0.393928		917.879	6.40586e-06	8.61042e-05	4.51253	3.92674	55.2612	pseudobulk	DESeq2	LRT	glmGamPoi	scranSumFactors
Mrps7	3dpi	-0.79838		421.474	6.43309e-06	8.64152e-05	-4.51163	-3.92587	55.2157	pseudobulk	DESeq2	LRT	glmGamPoi	scranSumFactors
A930005H10Rik	3dpi	-0.687862		217.563	6.50643e-06	8.73448e-05	-4.50923	-3.9233	55.0944	pseudobulk	DESeq2	LRT	glmGamPoi	scranSumFactors
Cdc42	3dpi	-0.499653		2469.37	6.53928e-06	8.77302e-05	-4.50816	-3.92224	55.0405	pseudobulk	DESeq2	LRT	glmGamPoi	scranSumFactors
Nudt14	3dpi	-1.09327		58.4218	6.55397e-06	8.78715e-05	-4.50768	-3.92185	55.0166	pseudobulk	DESeq2	LRT	glmGamPoi	scranSumFactors
C1qtnf4	3dpi	-0.727837		1411.67	6.56969e-06	8.80264e-05	-4.50717	-3.92143	54.991	pseudobulk	DESeq2	LRT	glmGamPoi	scranSumFactors
Vmn2r91	3dpi	-1.6092		32.0136	6.60217e-06	8.84055e-05	-4.50613	-3.92039	54.9383	pseudobulk	DESeq2	LRT	glmGamPoi	scranSumFactors
Tmem223	3dpi	-0.904374		438.043	6.60837e-06	8.84324e-05	-4.50593	-3.92032	54.9283	pseudobulk	DESeq2	LRT	glmGamPoi	scranSumFactors
Arf6	3dpi	-1.33115		72.3788	6.61715e-06	8.8471e-05	-4.50565	-3.92021	54.9142	pseudobulk	DESeq2	LRT	glmGamPoi	scranSumFactors
ENSMUSG00000046958	3dpi	-2.38434		20.7028	6.62469e-06	8.8471e-05	-4.5054	-3.92021	54.902	pseudobulk	DESeq2	LRT	glmGamPoi	scranSumFactors
Arxes2	3dpi	-1.11345		554.957	6.62538e-06	8.8471e-05	-4.50538	-3.92021	54.9009	pseudobulk	DESeq2	LRT	glmGamPoi	scranSumFactors
B3gat3	3dpi	-0.726798		833.999	6.62998e-06	8.8471e-05	-4.50523	-3.92021	54.8935	pseudobulk	DESeq2	LRT	glmGamPoi	scranSumFactors
Rhog	3dpi	-1.3973		136.22	6.63327e-06	8.8471e-05	-4.50513	-3.92021	54.8882	pseudobulk	DESeq2	LRT	glmGamPoi	scranSumFactors
ENSMUSG00000090996	3dpi	-0.658604		751.56	6.63637e-06	8.8471e-05	-4.50503	-3.92021	54.8832	pseudobulk	DESeq2	LRT	glmGamPoi	scranSumFactors
Fam162a	3dpi	-0.459895		525.769	6.6663e-06	8.88139e-05	-4.50407	-3.91928	54.8353	pseudobulk	DESeq2	LRT	glmGamPoi	scranSumFactors
A230057D06Rik	3dpi	0.364963		11619.9	6.68452e-06	8.8956e-05	4.50349	3.91889	54.8062	pseudobulk	DESeq2	LRT	glmGamPoi	scranSumFactors
Zfp704	3dpi	0.398656		2066.18	6.68538e-06	8.8956e-05	4.50347	3.91889	54.8049	pseudobulk	DESeq2	LRT	glmGamPoi	scranSumFactors
Tbrg1	3dpi	-0.72152		246.818	6.69364e-06	8.90099e-05	-4.5032	-3.91875	54.7917	pseudobulk	DESeq2	LRT	glmGamPoi	scranSumFactors
Rxrb	3dpi	-0.61162		305.163	6.73854e-06	8.95505e-05	-4.50178	-3.91729	54.7206	pseudobulk	DESeq2	LRT	glmGamPoi	scranSumFactors
Lin7a	3dpi	0.413382		1779.95	6.76243e-06	8.98115e-05	4.50103	3.91659	54.683	pseudobulk	DESeq2	LRT	glmGamPoi	scranSumFactors
Ppp1r14a	3dpi	-1.53976		537.597	6.77494e-06	8.99212e-05	-4.50064	-3.91629	54.6633	pseudobulk	DESeq2	LRT	glmGamPoi	scranSumFactors
Ddah2	3dpi	-1.46826		55.4413	6.79403e-06	9.00978e-05	-4.50004	-3.91582	54.6334	pseudobulk	DESeq2	LRT	glmGamPoi	scranSumFactors
Tkt	3dpi	-0.762602		1042.05	6.79678e-06	9.00978e-05	-4.49996	-3.91582	54.6291	pseudobulk	DESeq2	LRT	glmGamPoi	scranSumFactors
Sod3	3dpi	-2.63041		16.4947	6.81595e-06	9.02953e-05	-4.49936	-3.91529	54.5992	pseudobulk	DESeq2	LRT	glmGamPoi	scranSumFactors
Klhl3	3dpi	0.642864		945.684	6.83438e-06	9.04698e-05	4.49878	3.91483	54.5706	pseudobulk	DESeq2	LRT	glmGamPoi	scranSumFactors
Arl6ip4	3dpi	-0.78546		454.211	6.83768e-06	9.04698e-05	-4.49868	-3.91483	54.5655	pseudobulk	DESeq2	LRT	glmGamPoi	scranSumFactors
Dll3	3dpi	-1.34044		51.7164	6.84469e-06	9.05059e-05	-4.49846	-3.91473	54.5546	pseudobulk	DESeq2	LRT	glmGamPoi	scranSumFactors
ENSMUSG00000108489	3dpi	-1.77373		78.3822	6.85724e-06	9.0615e-05	-4.49807	-3.91444	54.5352	pseudobulk	DESeq2	LRT	glmGamPoi	scranSumFactors
Celf4	3dpi	0.429813		7507.44	6.87822e-06	9.08354e-05	4.49742	3.91385	54.5028	pseudobulk	DESeq2	LRT	glmGamPoi	scranSumFactors
Sestd1	3dpi	0.581492		1028.62	6.88722e-06	9.08976e-05	4.49714	3.91369	54.4889	pseudobulk	DESeq2	LRT	glmGamPoi	scranSumFactors
Stoml2	3dpi	-0.911019		251.215	6.89462e-06	9.09384e-05	-4.49692	-3.91358	54.4775	pseudobulk	DESeq2	LRT	glmGamPoi	scranSumFactors
Mtmr7	3dpi	0.456394		1124.08	6.91442e-06	9.1112e-05	4.49631	3.91312	54.4472	pseudobulk	DESeq2	LRT	glmGamPoi	scranSumFactors
Tspan15	3dpi	-0.769531		240.89	6.91641e-06	9.1112e-05	-4.49624	-3.91312	54.4441	pseudobulk	DESeq2	LRT	glmGamPoi	scranSumFactors
Lmtk2	3dpi	0.360367		1405.7	6.92424e-06	9.11294e-05	4.496	3.91307	54.4321	pseudobulk	DESeq2	LRT	glmGamPoi	scranSumFactors
Cdipt	3dpi	-0.671932		322.646	6.92635e-06	9.11294e-05	-4.49594	-3.91307	54.4289	pseudobulk	DESeq2	LRT	glmGamPoi	scranSumFactors
Vps13d	3dpi	0.400114		1816.61	6.98486e-06	9.18419e-05	4.49415	3.91119	54.3399	pseudobulk	DESeq2	LRT	glmGamPoi	scranSumFactors
Arxes1	3dpi	-1.08315		412.763	6.9974e-06	9.19497e-05	-4.49377	-3.91091	54.321	pseudobulk	DESeq2	LRT	glmGamPoi	scranSumFactors
1500009C09Rik	3dpi	-0.887418		178.604	7.00383e-06	9.19769e-05	-4.49357	-3.91084	54.3113	pseudobulk	DESeq2	LRT	glmGamPoi	scranSumFactors
AI837181	3dpi	-1.07749		173.51	7.01922e-06	9.21218e-05	-4.4931	-3.91046	54.2881	pseudobulk	DESeq2	LRT	glmGamPoi	scranSumFactors
Ppid	3dpi	-0.722507		609.075	7.04004e-06	9.23377e-05	-4.49247	-3.90989	54.2568	pseudobulk	DESeq2	LRT	glmGamPoi	scranSumFactors
Slc27a1	3dpi	-0.708917		720.422	7.04888e-06	9.23963e-05	-4.49221	-3.90974	54.2435	pseudobulk	DESeq2	LRT	glmGamPoi	scranSumFactors
A330076H08Rik	3dpi	0.417397		5140.27	7.06007e-06	9.24856e-05	4.49187	3.9095	54.2268	pseudobulk	DESeq2	LRT	glmGamPoi	scranSumFactors
Rimkla	3dpi	0.631739		299.54	7.07804e-06	9.26636e-05	4.49133	3.90904	54.2	pseudobulk	DESeq2	LRT	glmGamPoi	scranSumFactors
Serpinb1a	3dpi	-1.60322		228.805	7.09167e-06	9.27846e-05	-4.49092	-3.90872	54.1797	pseudobulk	DESeq2	LRT	glmGamPoi	scranSumFactors
Ubald2	3dpi	-0.618672		198.553	7.12446e-06	9.31559e-05	-4.48994	-3.90776	54.1311	pseudobulk	DESeq2	LRT	glmGamPoi	scranSumFactors
Krt1	3dpi	-1.40729		70.8707	7.14063e-06	9.32841e-05	-4.48945	-3.90743	54.1072	pseudobulk	DESeq2	LRT	glmGamPoi	scranSumFactors
Gm31747	3dpi	-1.27301		40.1169	7.14749e-06	9.32841e-05	-4.48925	-3.90743	54.0971	pseudobulk	DESeq2	LRT	glmGamPoi	scranSumFactors
Grina	3dpi	-0.660998		1996.1	7.14752e-06	9.32841e-05	-4.48925	-3.90743	54.097	pseudobulk	DESeq2	LRT	glmGamPoi	scranSumFactors
Ppfia4	3dpi	0.53866		553.349	7.15248e-06	9.32912e-05	4.4891	3.90741	54.0897	pseudobulk	DESeq2	LRT	glmGamPoi	scranSumFactors
Rnf167	3dpi	-0.589928		279.193	7.16229e-06	9.33289e-05	-4.48881	-3.90731	54.0753	pseudobulk	DESeq2	LRT	glmGamPoi	scranSumFactors
Abhd11	3dpi	-0.701797		282.749	7.1642e-06	9.33289e-05	-4.48875	-3.90731	54.0725	pseudobulk	DESeq2	LRT	glmGamPoi	scranSumFactors
Hnrnpab	3dpi	-0.80741		255.39	7.17479e-06	9.34094e-05	-4.48844	-3.9071	54.0569	pseudobulk	DESeq2	LRT	glmGamPoi	scranSumFactors
Mcph1	3dpi	0.447397		1001.24	7.18785e-06	9.35217e-05	4.48805	3.90681	54.0378	pseudobulk	DESeq2	LRT	glmGamPoi	scranSumFactors
Brinp1	3dpi	0.430166		4191.49	7.21413e-06	9.38059e-05	4.48727	3.90608	53.9994	pseudobulk	DESeq2	LRT	glmGamPoi	scranSumFactors
Cdc34	3dpi	-1.20767		93.8943	7.26973e-06	9.44708e-05	-4.48563	-3.90437	53.9187	pseudobulk	DESeq2	LRT	glmGamPoi	scranSumFactors
B3galt2	3dpi	-0.547048		438.467	7.27692e-06	9.44955e-05	-4.48542	-3.90431	53.9083	pseudobulk	DESeq2	LRT	glmGamPoi	scranSumFactors
Galnt14	3dpi	0.667557		639.26	7.28058e-06	9.44955e-05	4.48532	3.90431	53.903	pseudobulk	DESeq2	LRT	glmGamPoi	scranSumFactors
Itgb5	3dpi	-1.30412		175.076	7.31726e-06	9.4907e-05	-4.48424	-3.90326	53.8503	pseudobulk	DESeq2	LRT	glmGamPoi	scranSumFactors
Crtc1	3dpi	0.548633		604.743	7.32127e-06	9.4907e-05	4.48413	3.90326	53.8445	pseudobulk	DESeq2	LRT	glmGamPoi	scranSumFactors
Smim27	3dpi	-1.54966		38.6963	7.3432e-06	9.51329e-05	-4.48349	-3.90268	53.8131	pseudobulk	DESeq2	LRT	glmGamPoi	scranSumFactors
Bod1	3dpi	-0.966269		257.042	7.39444e-06	9.56953e-05	-4.48201	-3.90125	53.7403	pseudobulk	DESeq2	LRT	glmGamPoi	scranSumFactors
Adcy6	3dpi	0.581285		329.925	7.39657e-06	9.56953e-05	4.48195	3.90125	53.7372	pseudobulk	DESeq2	LRT	glmGamPoi	scranSumFactors
ATP6	3dpi	-1.20532		248.081	7.4002e-06	9.56953e-05	-4.48184	-3.90125	53.7321	pseudobulk	DESeq2	LRT	glmGamPoi	scranSumFactors
Efnb3	3dpi	-0.531785		926.838	7.41856e-06	9.58741e-05	-4.48131	-3.9008	53.7062	pseudobulk	DESeq2	LRT	glmGamPoi	scranSumFactors
ENSMUSG00000086942	3dpi	-0.649326		572.687	7.42631e-06	9.59155e-05	-4.48109	-3.9007	53.6952	pseudobulk	DESeq2	LRT	glmGamPoi	scranSumFactors
Snapc4	3dpi	0.485744		343.617	7.4608e-06	9.63022e-05	4.4801	3.89972	53.6467	pseudobulk	DESeq2	LRT	glmGamPoi	scranSumFactors
Emp3	3dpi	-3.0441		36.7748	7.52034e-06	9.70114e-05	-4.4784	-3.89795	53.5637	pseudobulk	DESeq2	LRT	glmGamPoi	scranSumFactors
Entpd1	3dpi	-0.800993		194.325	7.52898e-06	9.70636e-05	-4.47816	-3.89782	53.5517	pseudobulk	DESeq2	LRT	glmGamPoi	scranSumFactors
1700084F23Rik	3dpi	-1.65779		23.5998	7.54141e-06	9.71647e-05	-4.47781	-3.89757	53.5344	pseudobulk	DESeq2	LRT	glmGamPoi	scranSumFactors
9330188P03Rik	3dpi	-1.39149		91.9894	7.62796e-06	9.82198e-05	-4.47537	-3.89495	53.4154	pseudobulk	DESeq2	LRT	glmGamPoi	scranSumFactors
Psmd4	3dpi	-0.618024		1269.7	7.65546e-06	9.84927e-05	-4.4746	-3.89428	53.3779	pseudobulk	DESeq2	LRT	glmGamPoi	scranSumFactors
Mtfr1l	3dpi	-0.478591		356.567	7.66111e-06	9.84927e-05	-4.47444	-3.89428	53.3702	pseudobulk	DESeq2	LRT	glmGamPoi	scranSumFactors
Tceal9	3dpi	-1.20015		525.778	7.66551e-06	9.84927e-05	-4.47432	-3.89428	53.3642	pseudobulk	DESeq2	LRT	glmGamPoi	scranSumFactors
Cspg5	3dpi	-0.700083		2313.67	7.66779e-06	9.84927e-05	-4.47426	-3.89428	53.3611	pseudobulk	DESeq2	LRT	glmGamPoi	scranSumFactors
Ptrhd1	3dpi	-0.786997		114.953	7.6923e-06	9.87474e-05	-4.47357	-3.89365	53.3279	pseudobulk	DESeq2	LRT	glmGamPoi	scranSumFactors
Prmt1	3dpi	-0.905014		656.327	7.71973e-06	9.90394e-05	-4.47281	-3.89293	53.2909	pseudobulk	DESeq2	LRT	glmGamPoi	scranSumFactors
Miat	3dpi	0.522786		2158.63	7.72797e-06	9.90457e-05	4.47258	3.89292	53.2798	pseudobulk	DESeq2	LRT	glmGamPoi	scranSumFactors
2610001J05Rik	3dpi	-1.16655		118.625	7.7296e-06	9.90457e-05	-4.47254	-3.89292	53.2776	pseudobulk	DESeq2	LRT	glmGamPoi	scranSumFactors
Tmem59l	3dpi	-1.14089		1814.38	7.78093e-06	9.9643e-05	-4.47112	-3.89146	53.2088	pseudobulk	DESeq2	LRT	glmGamPoi	scranSumFactors
Fam193b	3dpi	0.401801		1245.75	7.78644e-06	9.96533e-05	4.47097	3.89143	53.2014	pseudobulk	DESeq2	LRT	glmGamPoi	scranSumFactors
Txndc17	3dpi	-1.0634		309.617	7.79759e-06	9.97356e-05	-4.47067	-3.89123	53.1865	pseudobulk	DESeq2	LRT	glmGamPoi	scranSumFactors
Lrp10	3dpi	-0.768619		173.371	7.81715e-06	9.98905e-05	-4.47013	-3.89086	53.1605	pseudobulk	DESeq2	LRT	glmGamPoi	scranSumFactors
Rapgef1	3dpi	0.461315		1139.27	7.81916e-06	9.98905e-05	4.47008	3.89086	53.1579	pseudobulk	DESeq2	LRT	glmGamPoi	scranSumFactors
Ier3ip1	3dpi	-0.791829		515.951	7.83874e-06	0.00010008	-4.46954	-3.8904	53.1319	pseudobulk	DESeq2	LRT	glmGamPoi	scranSumFactors
Rab11b	3dpi	-0.510746		598.312	7.85785e-06	0.000100264	-4.46902	-3.88995	53.1066	pseudobulk	DESeq2	LRT	glmGamPoi	scranSumFactors
Med10	3dpi	-0.84173		156.927	7.87199e-06	0.000100372	-4.46864	-3.88969	53.088	pseudobulk	DESeq2	LRT	glmGamPoi	scranSumFactors
Mthfr	3dpi	0.485486		350.365	7.87583e-06	0.000100372	4.46853	3.88969	53.0829	pseudobulk	DESeq2	LRT	glmGamPoi	scranSumFactors
Pip4p1	3dpi	-0.800735		595.041	7.88169e-06	0.000100386	-4.46837	-3.88966	53.0752	pseudobulk	DESeq2	LRT	glmGamPoi	scranSumFactors
Pi4ka	3dpi	0.376743		3262.06	7.90399e-06	0.000100609	4.46777	3.88912	53.0459	pseudobulk	DESeq2	LRT	glmGamPoi	scranSumFactors
Usp33	3dpi	0.339749		1677.52	7.91047e-06	0.000100631	4.46759	3.88907	53.0374	pseudobulk	DESeq2	LRT	glmGamPoi	scranSumFactors
Camsap1	3dpi	0.366663		807.094	7.9375e-06	0.000100914	4.46686	3.88838	53.0021	pseudobulk	DESeq2	LRT	glmGamPoi	scranSumFactors
Fam174a	3dpi	-0.790729		668.463	7.96337e-06	0.000101182	-4.46617	-3.88774	52.9684	pseudobulk	DESeq2	LRT	glmGamPoi	scranSumFactors
Ncoa2	3dpi	0.407965		2954.31	8.0132e-06	0.000101754	4.46483	3.88637	52.9039	pseudobulk	DESeq2	LRT	glmGamPoi	scranSumFactors
Sac3d1	3dpi	-1.06776		73.945	8.03768e-06	0.000102004	-4.46418	-3.88578	52.8723	pseudobulk	DESeq2	LRT	glmGamPoi	scranSumFactors
ENSMUSG00000106536	3dpi	-0.78319		136.161	8.04884e-06	0.000102084	-4.46388	-3.88558	52.858	pseudobulk	DESeq2	LRT	glmGamPoi	scranSumFactors
Ly6c1	3dpi	-3.17147		58.7418	8.09182e-06	0.000102568	-4.46274	-3.88444	52.803	pseudobulk	DESeq2	LRT	glmGamPoi	scranSumFactors
Strap	3dpi	-0.840635		343.318	8.09778e-06	0.000102582	-4.46258	-3.8844	52.7954	pseudobulk	DESeq2	LRT	glmGamPoi	scranSumFactors
Olfr323	3dpi	-0.911463		115.757	8.13081e-06	0.000102938	-4.46171	-3.88356	52.7534	pseudobulk	DESeq2	LRT	glmGamPoi	scranSumFactors
Bloc1s5	3dpi	-0.642378		364.022	8.15046e-06	0.000103125	-4.46119	-3.88312	52.7285	pseudobulk	DESeq2	LRT	glmGamPoi	scranSumFactors
Arhgdig	3dpi	-1.11362		885.617	8.23211e-06	0.000104096	-4.45906	-3.88084	52.6258	pseudobulk	DESeq2	LRT	glmGamPoi	scranSumFactors
Adam22	3dpi	0.315738		4332.31	8.2393e-06	0.000104125	4.45887	3.88077	52.6168	pseudobulk	DESeq2	LRT	glmGamPoi	scranSumFactors
Lpar4	3dpi	-2.26936		24.4238	8.24845e-06	0.000104178	-4.45863	-3.88065	52.6054	pseudobulk	DESeq2	LRT	glmGamPoi	scranSumFactors
Golga4	3dpi	0.351684		1514.86	8.31683e-06	0.000104923	4.45686	3.87892	52.5205	pseudobulk	DESeq2	LRT	glmGamPoi	scranSumFactors
Ddit4	3dpi	-1.14419		196.591	8.31886e-06	0.000104923	-4.45681	-3.87892	52.5179	pseudobulk	DESeq2	LRT	glmGamPoi	scranSumFactors
Cox6b2	3dpi	-1.30788		91.8546	8.32236e-06	0.000104923	-4.45672	-3.87892	52.5136	pseudobulk	DESeq2	LRT	glmGamPoi	scranSumFactors
Aamdc	3dpi	-0.515867		419.825	8.33487e-06	0.000105018	-4.4564	-3.87869	52.4982	pseudobulk	DESeq2	LRT	glmGamPoi	scranSumFactors
Thra	3dpi	-0.488865		2287.64	8.40874e-06	0.000105886	-4.4545	-3.87669	52.4076	pseudobulk	DESeq2	LRT	glmGamPoi	scranSumFactors
ENSMUSG00000101448	3dpi	-1.16046		122.908	8.42122e-06	0.00010598	-4.45419	-3.87648	52.3924	pseudobulk	DESeq2	LRT	glmGamPoi	scranSumFactors
Mrpl53	3dpi	-0.772875		221.022	8.47863e-06	0.000106639	-4.45273	-3.87497	52.3227	pseudobulk	DESeq2	LRT	glmGamPoi	scranSumFactors
Tmed1	3dpi	-0.850545		210.723	8.49094e-06	0.00010673	-4.45242	-3.87476	52.3079	pseudobulk	DESeq2	LRT	glmGamPoi	scranSumFactors
Sh3bgrl	3dpi	-0.604276		368.028	8.52401e-06	0.000107082	-4.45158	-3.87396	52.268	pseudobulk	DESeq2	LRT	glmGamPoi	scranSumFactors
Lage3	3dpi	-0.664396		488.433	8.59066e-06	0.000107855	-4.44991	-3.8722	52.1884	pseudobulk	DESeq2	LRT	glmGamPoi	scranSumFactors
Ctxn2	3dpi	-0.996212		420.114	8.61837e-06	0.000108139	-4.44922	-3.87156	52.1554	pseudobulk	DESeq2	LRT	glmGamPoi	scranSumFactors
Nol3	3dpi	-0.958182		133.043	8.63331e-06	0.000108262	-4.44885	-3.87129	52.1377	pseudobulk	DESeq2	LRT	glmGamPoi	scranSumFactors
ND4L	3dpi	-1.69659		25.3933	8.65621e-06	0.000108485	-4.44828	-3.87079	52.1107	pseudobulk	DESeq2	LRT	glmGamPoi	scranSumFactors
Car10	3dpi	0.600905		8998.07	8.68557e-06	0.000108788	4.44755	3.87011	52.0761	pseudobulk	DESeq2	LRT	glmGamPoi	scranSumFactors
Il18	3dpi	-0.941817		543.306	8.71491e-06	0.000109091	-4.44682	-3.86943	52.0417	pseudobulk	DESeq2	LRT	glmGamPoi	scranSumFactors
Tmem109	3dpi	-0.661382		237.352	8.75983e-06	0.000109589	-4.44572	-3.86832	51.9893	pseudobulk	DESeq2	LRT	glmGamPoi	scranSumFactors
Dpm1	3dpi	-0.860405		520.56	8.78297e-06	0.000109798	-4.44515	-3.86785	51.9624	pseudobulk	DESeq2	LRT	glmGamPoi	scranSumFactors
Apoc1	3dpi	-1.97781		31.9201	8.78694e-06	0.000109798	-4.44506	-3.86785	51.9578	pseudobulk	DESeq2	LRT	glmGamPoi	scranSumFactors
Npepl1	3dpi	-0.972007		98.2508	8.82931e-06	0.000110227	-4.44402	-3.8669	51.9088	pseudobulk	DESeq2	LRT	glmGamPoi	scranSumFactors
Samd12	3dpi	0.341215		6250.91	8.838e-06	0.000110227	4.44381	3.8669	51.8988	pseudobulk	DESeq2	LRT	glmGamPoi	scranSumFactors
ENSMUSG00000097305	3dpi	0.537762		1212.58	8.83826e-06	0.000110227	4.4438	3.8669	51.8985	pseudobulk	DESeq2	LRT	glmGamPoi	scranSumFactors
Mrpl24	3dpi	-0.582133		326.403	8.8422e-06	0.000110227	-4.44371	-3.8669	51.8939	pseudobulk	DESeq2	LRT	glmGamPoi	scranSumFactors
Paqr6	3dpi	-1.87993		181.161	8.87894e-06	0.00011062	-4.44282	-3.86603	51.8518	pseudobulk	DESeq2	LRT	glmGamPoi	scranSumFactors
Clcn1	3dpi	0.755455		121.488	8.89006e-06	0.000110694	4.44255	3.86587	51.839	pseudobulk	DESeq2	LRT	glmGamPoi	scranSumFactors
Ifnar2	3dpi	-0.548248		300.485	8.89668e-06	0.000110711	-4.44239	-3.86583	51.8314	pseudobulk	DESeq2	LRT	glmGamPoi	scranSumFactors
Mrto4	3dpi	-1.04015		238.522	8.90529e-06	0.000110753	-4.44218	-3.86574	51.8216	pseudobulk	DESeq2	LRT	glmGamPoi	scranSumFactors
Pex16	3dpi	-0.612441		248.797	8.97244e-06	0.000111461	-4.44056	-3.86418	51.7453	pseudobulk	DESeq2	LRT	glmGamPoi	scranSumFactors
Ubqln2	3dpi	-1.1545		339.818	8.97283e-06	0.000111461	-4.44055	-3.86418	51.7449	pseudobulk	DESeq2	LRT	glmGamPoi	scranSumFactors
Pcp4	3dpi	-1.37701		1624.23	9.0059e-06	0.000111806	-4.43976	-3.86343	51.7075	pseudobulk	DESeq2	LRT	glmGamPoi	scranSumFactors
Wfdc18	3dpi	-1.91562		19.7895	9.03715e-06	0.000112124	-4.43901	-3.86274	51.6724	pseudobulk	DESeq2	LRT	glmGamPoi	scranSumFactors
Cfap298	3dpi	-0.873036		181.871	9.04211e-06	0.000112124	-4.4389	-3.86274	51.6668	pseudobulk	DESeq2	LRT	glmGamPoi	scranSumFactors
Cwc15	3dpi	-0.549606		527.848	9.06962e-06	0.000112399	-4.43824	-3.86214	51.636	pseudobulk	DESeq2	LRT	glmGamPoi	scranSumFactors
Gtf2ird1	3dpi	0.393582		1341.67	9.07943e-06	0.000112455	4.43801	3.86202	51.625	pseudobulk	DESeq2	LRT	glmGamPoi	scranSumFactors
Fbxw2	3dpi	-0.351917		861.382	9.08594e-06	0.000112466	-4.43786	-3.86199	51.6178	pseudobulk	DESeq2	LRT	glmGamPoi	scranSumFactors
Med7	3dpi	-0.667995		178.865	9.09097e-06	0.000112466	-4.43774	-3.86199	51.6122	pseudobulk	DESeq2	LRT	glmGamPoi	scranSumFactors
Igf2	3dpi	-4.03804		34.8296	9.13825e-06	0.000112985	-4.43662	-3.86087	51.5596	pseudobulk	DESeq2	LRT	glmGamPoi	scranSumFactors
Dcaf5	3dpi	0.427388		1484.11	9.15796e-06	0.000113152	4.43616	3.86051	51.5378	pseudobulk	DESeq2	LRT	glmGamPoi	scranSumFactors
Nipsnap3b	3dpi	-0.84997		103.229	9.16246e-06	0.000113152	-4.43605	-3.86051	51.5329	pseudobulk	DESeq2	LRT	glmGamPoi	scranSumFactors
Hpca	3dpi	-1.11657		289.286	9.22866e-06	0.000113903	-4.4345	-3.85889	51.4601	pseudobulk	DESeq2	LRT	glmGamPoi	scranSumFactors
ENSMUSG00000054391	3dpi	-0.742431		703.531	9.26019e-06	0.000114225	-4.43376	-3.8582	51.4256	pseudobulk	DESeq2	LRT	glmGamPoi	scranSumFactors
Sdf2l1	3dpi	-1.21057		121.104	9.28206e-06	0.000114428	-4.43326	-3.85777	51.4018	pseudobulk	DESeq2	LRT	glmGamPoi	scranSumFactors
Slc9a7	3dpi	0.373918		1414.69	9.30733e-06	0.000114673	4.43267	3.85724	51.3743	pseudobulk	DESeq2	LRT	glmGamPoi	scranSumFactors
Rnaseh2c	3dpi	-0.923614		308.955	9.36815e-06	0.000115355	-4.43127	-3.85579	51.3086	pseudobulk	DESeq2	LRT	glmGamPoi	scranSumFactors
Sgip1	3dpi	0.314837		7001.29	9.42244e-06	0.000115956	4.43002	3.85452	51.2504	pseudobulk	DESeq2	LRT	glmGamPoi	scranSumFactors
Stau2	3dpi	0.358337		4016.92	9.46236e-06	0.000116379	4.42911	3.85363	51.2078	pseudobulk	DESeq2	LRT	glmGamPoi	scranSumFactors
ENSMUSG00000087402	3dpi	-0.948277		372.226	9.49201e-06	0.000116676	-4.42843	-3.85301	51.1763	pseudobulk	DESeq2	LRT	glmGamPoi	scranSumFactors
Dusp3	3dpi	-0.417325		523.649	9.50762e-06	0.0001168	-4.42808	-3.85275	51.1598	pseudobulk	DESeq2	LRT	glmGamPoi	scranSumFactors
Arpc5l	3dpi	-0.693501		756.126	9.53225e-06	0.000117035	-4.42752	-3.85226	51.1338	pseudobulk	DESeq2	LRT	glmGamPoi	scranSumFactors
Sptan1	3dpi	0.385265		2940.13	9.54302e-06	0.000117099	4.42728	3.85212	51.1224	pseudobulk	DESeq2	LRT	glmGamPoi	scranSumFactors
ENSMUSG00000108880	3dpi	0.442048		2114.05	9.57902e-06	0.000117434	4.42646	3.85142	51.0846	pseudobulk	DESeq2	LRT	glmGamPoi	scranSumFactors
Ctla4	3dpi	-1.40015		30.6404	9.58176e-06	0.000117434	-4.4264	-3.85142	51.0817	pseudobulk	DESeq2	LRT	glmGamPoi	scranSumFactors
Hes5	3dpi	-2.17499		280.315	9.587e-06	0.000117434	-4.42628	-3.85142	51.0762	pseudobulk	DESeq2	LRT	glmGamPoi	scranSumFactors
ENSMUSG00000104208	3dpi	-0.855383		115.442	9.61286e-06	0.000117682	-4.4257	-3.8509	51.0491	pseudobulk	DESeq2	LRT	glmGamPoi	scranSumFactors
Rpl10a-ps1	3dpi	-0.728566		291.083	9.63836e-06	0.000117926	-4.42513	-3.8504	51.0225	pseudobulk	DESeq2	LRT	glmGamPoi	scranSumFactors
Gstm7	3dpi	-1.16518		95.9001	9.64749e-06	0.00011797	-4.42493	-3.85031	51.013	pseudobulk	DESeq2	LRT	glmGamPoi	scranSumFactors
Usf1	3dpi	-0.629215		179.035	9.66259e-06	0.000118086	-4.42459	-3.85007	50.9973	pseudobulk	DESeq2	LRT	glmGamPoi	scranSumFactors
Ppm1h	3dpi	0.484716		1811.13	9.6794e-06	0.000118206	4.42421	3.84982	50.9799	pseudobulk	DESeq2	LRT	glmGamPoi	scranSumFactors
Myl12a	3dpi	-1.91928		18.5407	9.68828e-06	0.000118206	-4.42402	-3.84982	50.9707	pseudobulk	DESeq2	LRT	glmGamPoi	scranSumFactors
Akap6	3dpi	0.349722		8992.64	9.68918e-06	0.000118206	4.424	3.84982	50.9698	pseudobulk	DESeq2	LRT	glmGamPoi	scranSumFactors
Tmem9b	3dpi	-0.729503		441.871	9.70227e-06	0.000118297	-4.4237	-3.84963	50.9562	pseudobulk	DESeq2	LRT	glmGamPoi	scranSumFactors
Mtss1	3dpi	0.370156		1921.04	9.71178e-06	0.000118345	4.42349	3.84953	50.9464	pseudobulk	DESeq2	LRT	glmGamPoi	scranSumFactors
Mrgprx2	3dpi	-1.36002		47.6513	9.72637e-06	0.000118454	-4.42317	-3.8493	50.9314	pseudobulk	DESeq2	LRT	glmGamPoi	scranSumFactors
Ufm1	3dpi	-0.801268		168.557	9.73532e-06	0.000118495	-4.42297	-3.84922	50.9222	pseudobulk	DESeq2	LRT	glmGamPoi	scranSumFactors
Hspb8	3dpi	-1.70235		23.8442	9.76732e-06	0.000118816	-4.42226	-3.84856	50.8893	pseudobulk	DESeq2	LRT	glmGamPoi	scranSumFactors
Btbd9	3dpi	0.444431		3030.63	9.81865e-06	0.000119372	4.42113	3.84741	50.8368	pseudobulk	DESeq2	LRT	glmGamPoi	scranSumFactors
Uqcrc2	3dpi	-0.502984		1055.31	9.85094e-06	0.000119686	-4.42042	-3.84677	50.804	pseudobulk	DESeq2	LRT	glmGamPoi	scranSumFactors
Slc1a3	3dpi	-1.2439		1914.93	9.85586e-06	0.000119686	-4.42031	-3.84677	50.799	pseudobulk	DESeq2	LRT	glmGamPoi	scranSumFactors
Arhgap5	3dpi	-0.470091		2868.27	9.88655e-06	0.00011999	-4.41964	-3.84615	50.7679	pseudobulk	DESeq2	LRT	glmGamPoi	scranSumFactors
S100a11	3dpi	-2.95496		22.0076	9.92161e-06	0.000120347	-4.41887	-3.84542	50.7325	pseudobulk	DESeq2	LRT	glmGamPoi	scranSumFactors
Tmem98	3dpi	-1.26874		88.8815	9.9547e-06	0.000120679	-4.41815	-3.84474	50.6992	pseudobulk	DESeq2	LRT	glmGamPoi	scranSumFactors
Tspan7	3dpi	-0.336107		3893.69	9.96995e-06	0.000120794	-4.41782	-3.84451	50.684	pseudobulk	DESeq2	LRT	glmGamPoi	scranSumFactors
Gm9320	3dpi	-1.35768		32.3338	9.99381e-06	0.000121014	-4.41731	-3.84406	50.6601	pseudobulk	DESeq2	LRT	glmGamPoi	scranSumFactors
Rpl12	3dpi	-0.910754		414.27	1.001e-05	0.000121141	-4.41696	-3.84381	50.644	pseudobulk	DESeq2	LRT	glmGamPoi	scranSumFactors
Jakmip1	3dpi	0.466529		2040.81	1.00341e-05	0.000121363	4.41644	3.84336	50.6199	pseudobulk	DESeq2	LRT	glmGamPoi	scranSumFactors
Kcnh7	3dpi	0.431053		6898.75	1.00425e-05	0.000121394	4.41626	3.84329	50.6117	pseudobulk	DESeq2	LRT	glmGamPoi	scranSumFactors
Nol4l	3dpi	0.483117		1217.6	1.00587e-05	0.000121522	4.41591	3.84304	50.5955	pseudobulk	DESeq2	LRT	glmGamPoi	scranSumFactors
Tm2d3	3dpi	-1.04784		979.974	1.0074e-05	0.000121573	-4.41558	-3.84293	50.5804	pseudobulk	DESeq2	LRT	glmGamPoi	scranSumFactors
Fgfr3	3dpi	-1.21724		377.949	1.00745e-05	0.000121573	-4.41557	-3.84293	50.5799	pseudobulk	DESeq2	LRT	glmGamPoi	scranSumFactors
Ostf1	3dpi	-0.752126		164.525	1.00915e-05	0.000121709	-4.4152	-3.84266	50.5631	pseudobulk	DESeq2	LRT	glmGamPoi	scranSumFactors
Tmem59	3dpi	-0.826451		2137.96	1.0121e-05	0.000121995	-4.41457	-3.84208	50.534	pseudobulk	DESeq2	LRT	glmGamPoi	scranSumFactors
Fuom	3dpi	-0.825667		374.311	1.01509e-05	0.000122286	-4.41393	-3.8415	50.5046	pseudobulk	DESeq2	LRT	glmGamPoi	scranSumFactors
Aldh2	3dpi	-0.685694		346.347	1.02188e-05	0.000123033	-4.41249	-3.84	50.4383	pseudobulk	DESeq2	LRT	glmGamPoi	scranSumFactors
Mmp16	3dpi	0.382722		4581.41	1.02294e-05	0.000123091	4.41227	3.83989	50.428	pseudobulk	DESeq2	LRT	glmGamPoi	scranSumFactors
Gid8	3dpi	-0.723689		198.828	1.02831e-05	0.000123667	-4.41113	-3.83874	50.376	pseudobulk	DESeq2	LRT	glmGamPoi	scranSumFactors
Rtn4	3dpi	-0.484629		5057.71	1.03049e-05	0.000123858	-4.41067	-3.83836	50.355	pseudobulk	DESeq2	LRT	glmGamPoi	scranSumFactors
Omg	3dpi	-0.807865		355.681	1.03503e-05	0.000124316	-4.40972	-3.83746	50.3114	pseudobulk	DESeq2	LRT	glmGamPoi	scranSumFactors
Oard1	3dpi	-0.817122		113.83	1.03547e-05	0.000124316	-4.40963	-3.83746	50.3071	pseudobulk	DESeq2	LRT	glmGamPoi	scranSumFactors
Emc10	3dpi	-0.684799		1284.51	1.04077e-05	0.00012488	-4.40853	-3.83634	50.2565	pseudobulk	DESeq2	LRT	glmGamPoi	scranSumFactors
Eif4g3	3dpi	0.329037		3553.96	1.04288e-05	0.000125063	4.40809	3.83598	50.2364	pseudobulk	DESeq2	LRT	glmGamPoi	scranSumFactors
Tasp1	3dpi	0.363723		1739.06	1.04369e-05	0.000125089	4.40792	3.83593	50.2287	pseudobulk	DESeq2	LRT	glmGamPoi	scranSumFactors
ENSMUSG00000092004	3dpi	-2.07145		14.5232	1.05016e-05	0.000125793	-4.40658	-3.83455	50.1675	pseudobulk	DESeq2	LRT	glmGamPoi	scranSumFactors
Cnn3	3dpi	-0.590958		201.626	1.05365e-05	0.00012614	-4.40586	-3.83388	50.1346	pseudobulk	DESeq2	LRT	glmGamPoi	scranSumFactors
Sccpdh	3dpi	-0.519204		623.214	1.05427e-05	0.000126142	-4.40573	-3.83387	50.1289	pseudobulk	DESeq2	LRT	glmGamPoi	scranSumFactors
Tuba4a	3dpi	-0.905676		568.757	1.05879e-05	0.000126612	-4.4048	-3.83296	50.0865	pseudobulk	DESeq2	LRT	glmGamPoi	scranSumFactors
Ddost	3dpi	-1.04619		464.09	1.07572e-05	0.000128563	-4.40136	-3.82919	49.9299	pseudobulk	DESeq2	LRT	glmGamPoi	scranSumFactors
Pcbd1	3dpi	-1.30797		189.662	1.07768e-05	0.000128692	-4.40097	-3.82895	49.912	pseudobulk	DESeq2	LRT	glmGamPoi	scranSumFactors
Clic1	3dpi	-2.13757		49.5091	1.07802e-05	0.000128692	-4.4009	-3.82895	49.9089	pseudobulk	DESeq2	LRT	glmGamPoi	scranSumFactors
Slc35a5	3dpi	-0.539281		253.24	1.08101e-05	0.000128977	-4.4003	-3.8284	49.8815	pseudobulk	DESeq2	LRT	glmGamPoi	scranSumFactors
Ifitm2	3dpi	-2.95656		23.8307	1.08312e-05	0.000129089	-4.39988	-3.82819	49.8624	pseudobulk	DESeq2	LRT	glmGamPoi	scranSumFactors
Chaserr	3dpi	-0.363549		1254.72	1.08326e-05	0.000129089	-4.39985	-3.82819	49.861	pseudobulk	DESeq2	LRT	glmGamPoi	scranSumFactors
Gm15286	3dpi	-1.58896		23.1729	1.08378e-05	0.000129089	-4.39974	-3.82819	49.8563	pseudobulk	DESeq2	LRT	glmGamPoi	scranSumFactors
Mmgt2	3dpi	-1.02581		94.7436	1.08586e-05	0.000129263	-4.39933	-3.82786	49.8375	pseudobulk	DESeq2	LRT	glmGamPoi	scranSumFactors
Cebpzos	3dpi	-1.04997		172.784	1.0926e-05	0.000129993	-4.39799	-3.82647	49.7766	pseudobulk	DESeq2	LRT	glmGamPoi	scranSumFactors
Slc2a3	3dpi	0.445071		1065.04	1.09436e-05	0.000130121	4.39764	3.82623	49.7608	pseudobulk	DESeq2	LRT	glmGamPoi	scranSumFactors
Osbpl10	3dpi	0.547396		996.989	1.09492e-05	0.000130121	4.39753	3.82623	49.7558	pseudobulk	DESeq2	LRT	glmGamPoi	scranSumFactors
Lrfn2	3dpi	0.66844		1488.38	1.09861e-05	0.000130448	4.3968	3.82561	49.7227	pseudobulk	DESeq2	LRT	glmGamPoi	scranSumFactors
Prelp	3dpi	-2.36677		32.6405	1.0989e-05	0.000130448	-4.39674	-3.82561	49.72	pseudobulk	DESeq2	LRT	glmGamPoi	scranSumFactors
ENSMUSG00000086600	3dpi	-1.64917		209.022	1.09952e-05	0.000130448	-4.39662	-3.82561	49.7145	pseudobulk	DESeq2	LRT	glmGamPoi	scranSumFactors
Cdk2ap1	3dpi	-0.570159		360.98	1.10058e-05	0.000130501	-4.39641	-3.82551	49.705	pseudobulk	DESeq2	LRT	glmGamPoi	scranSumFactors
Gm32014	3dpi	0.549801		512.489	1.10673e-05	0.000131156	4.3952	3.82428	49.6503	pseudobulk	DESeq2	LRT	glmGamPoi	scranSumFactors
ENSMUSG00000087700	3dpi	-0.764029		287.061	1.10835e-05	0.000131274	-4.39488	-3.82406	49.636	pseudobulk	DESeq2	LRT	glmGamPoi	scranSumFactors
Trem2	3dpi	-1.79451		26.9912	1.10957e-05	0.000131299	-4.39464	-3.82401	49.6251	pseudobulk	DESeq2	LRT	glmGamPoi	scranSumFactors
Ift27	3dpi	-0.784162		167.147	1.11028e-05	0.000131299	-4.3945	-3.82401	49.6189	pseudobulk	DESeq2	LRT	glmGamPoi	scranSumFactors
Gm11266	3dpi	-1.3758		208.291	1.1109e-05	0.000131299	-4.39438	-3.82401	49.6134	pseudobulk	DESeq2	LRT	glmGamPoi	scranSumFactors
Etfa	3dpi	-0.352887		802.493	1.11104e-05	0.000131299	-4.39435	-3.82401	49.6122	pseudobulk	DESeq2	LRT	glmGamPoi	scranSumFactors
Tmem97	3dpi	-0.953854		131.751	1.11397e-05	0.000131571	-4.39378	-3.8235	49.5864	pseudobulk	DESeq2	LRT	glmGamPoi	scranSumFactors
ENSMUSG00000103983	3dpi	0.601056		190.658	1.11522e-05	0.000131646	4.39353	3.82336	49.5753	pseudobulk	DESeq2	LRT	glmGamPoi	scranSumFactors
Sephs2	3dpi	-0.957423		163.953	1.11606e-05	0.000131671	-4.39337	-3.82331	49.568	pseudobulk	DESeq2	LRT	glmGamPoi	scranSumFactors
Gm10925	3dpi	-1.18888		241.927	1.11892e-05	0.000131935	-4.39282	-3.82282	49.5429	pseudobulk	DESeq2	LRT	glmGamPoi	scranSumFactors
Mark1	3dpi	0.395053		1213.43	1.12005e-05	0.000131995	4.3926	3.82271	49.533	pseudobulk	DESeq2	LRT	glmGamPoi	scranSumFactors
Golga7	3dpi	-0.57224		417.904	1.12312e-05	0.000132283	-4.392	-3.82217	49.5062	pseudobulk	DESeq2	LRT	glmGamPoi	scranSumFactors
Slc25a27	3dpi	0.310736		1632.76	1.12581e-05	0.000132526	4.39148	3.82172	49.4827	pseudobulk	DESeq2	LRT	glmGamPoi	scranSumFactors
Apod	3dpi	-1.3325		1680.38	1.13479e-05	0.000133509	-4.38975	-3.81989	49.405	pseudobulk	DESeq2	LRT	glmGamPoi	scranSumFactors
Atp1b1	3dpi	-0.662694		6363.82	1.13633e-05	0.000133615	-4.38946	-3.8197	49.3918	pseudobulk	DESeq2	LRT	glmGamPoi	scranSumFactors
Rbm3	3dpi	-0.64074		405.323	1.13724e-05	0.000133648	-4.38929	-3.81964	49.384	pseudobulk	DESeq2	LRT	glmGamPoi	scranSumFactors
Ifngr1	3dpi	-0.739264		155.935	1.14126e-05	0.000134045	-4.38852	-3.8189	49.3495	pseudobulk	DESeq2	LRT	glmGamPoi	scranSumFactors
Lgi4	3dpi	-1.42844		108.758	1.14315e-05	0.000134193	-4.38816	-3.81863	49.3334	pseudobulk	DESeq2	LRT	glmGamPoi	scranSumFactors
Cetn2	3dpi	-1.18435		128.727	1.14439e-05	0.000134194	-4.38792	-3.81863	49.3227	pseudobulk	DESeq2	LRT	glmGamPoi	scranSumFactors
Akr7a5	3dpi	-0.892039		169.773	1.14443e-05	0.000134194	-4.38791	-3.81863	49.3224	pseudobulk	DESeq2	LRT	glmGamPoi	scranSumFactors
Gatm	3dpi	-1.21128		1181.87	1.14809e-05	0.000134549	-4.38722	-3.81798	49.2912	pseudobulk	DESeq2	LRT	glmGamPoi	scranSumFactors
Hbb-b1	3dpi	-3.00848		545.522	1.15054e-05	0.000134761	-4.38676	-3.81759	49.2704	pseudobulk	DESeq2	LRT	glmGamPoi	scranSumFactors
Pnp	3dpi	-0.752912		141.296	1.15146e-05	0.000134794	-4.38658	-3.81753	49.2627	pseudobulk	DESeq2	LRT	glmGamPoi	scranSumFactors
Rab14	3dpi	-0.439928		1401.23	1.15298e-05	0.000134886	-4.38629	-3.81736	49.2498	pseudobulk	DESeq2	LRT	glmGamPoi	scranSumFactors
ENSMUSG00000043340	3dpi	-0.637917		300.107	1.15352e-05	0.000134886	-4.38619	-3.81736	49.2452	pseudobulk	DESeq2	LRT	glmGamPoi	scranSumFactors
Cct2	3dpi	-0.878129		511.31	1.15581e-05	0.000135079	-4.38576	-3.81701	49.2259	pseudobulk	DESeq2	LRT	glmGamPoi	scranSumFactors
Ckmt1	3dpi	-0.806921		848.02	1.15656e-05	0.000135092	-4.38562	-3.81699	49.2196	pseudobulk	DESeq2	LRT	glmGamPoi	scranSumFactors
Xkr4	3dpi	0.458773		14888.5	1.16081e-05	0.000135513	4.38482	3.81622	49.1838	pseudobulk	DESeq2	LRT	glmGamPoi	scranSumFactors
Ext2	3dpi	0.341456		915.609	1.16161e-05	0.000135532	4.38467	3.81618	49.1771	pseudobulk	DESeq2	LRT	glmGamPoi	scranSumFactors
4930513D17Rik	3dpi	-1.0476		63.075	1.16317e-05	0.000135567	-4.38438	-3.81612	49.164	pseudobulk	DESeq2	LRT	glmGamPoi	scranSumFactors
P2ry12	3dpi	-0.655409		340.577	1.1632e-05	0.000135567	-4.38437	-3.81612	49.1638	pseudobulk	DESeq2	LRT	glmGamPoi	scranSumFactors
Pantr2	3dpi	-1.07966		120.178	1.16401e-05	0.000135588	-4.38422	-3.81608	49.157	pseudobulk	DESeq2	LRT	glmGamPoi	scranSumFactors
Brk1	3dpi	-0.416686		721.877	1.16697e-05	0.000135857	-4.38367	-3.81559	49.1323	pseudobulk	DESeq2	LRT	glmGamPoi	scranSumFactors
Kcnn3	3dpi	0.817702		908.531	1.16917e-05	0.000136039	4.38326	3.81526	49.1139	pseudobulk	DESeq2	LRT	glmGamPoi	scranSumFactors
ENSMUSG00000110080	3dpi	-1.49846		601.764	1.17062e-05	0.000136133	-4.38299	-3.81509	49.1019	pseudobulk	DESeq2	LRT	glmGamPoi	scranSumFactors
Tbce	3dpi	0.322028		1353.81	1.17339e-05	0.000136365	4.38247	3.81467	49.0789	pseudobulk	DESeq2	LRT	glmGamPoi	scranSumFactors
Prrx1	3dpi	-1.43303		231.119	1.17391e-05	0.000136365	-4.38238	-3.81467	49.0746	pseudobulk	DESeq2	LRT	glmGamPoi	scranSumFactors
Ncbp2	3dpi	-0.552739		332.251	1.18567e-05	0.000137655	-4.38021	-3.81234	48.9778	pseudobulk	DESeq2	LRT	glmGamPoi	scranSumFactors
Sap30l	3dpi	-0.687553		229.687	1.19074e-05	0.000138168	-4.37928	-3.81143	48.9364	pseudobulk	DESeq2	LRT	glmGamPoi	scranSumFactors
Npdc1	3dpi	-0.877493		1521.05	1.1979e-05	0.000138819	-4.37797	-3.81026	48.8783	pseudobulk	DESeq2	LRT	glmGamPoi	scranSumFactors
Capns1	3dpi	-0.578317		666.594	1.19799e-05	0.000138819	-4.37795	-3.81026	48.8775	pseudobulk	DESeq2	LRT	glmGamPoi	scranSumFactors
Riok3	3dpi	0.316498		1266.84	1.19832e-05	0.000138819	4.37789	3.81026	48.8748	pseudobulk	DESeq2	LRT	glmGamPoi	scranSumFactors
Psma4	3dpi	-0.707124		506	1.20567e-05	0.000139532	-4.37656	-3.809	48.8156	pseudobulk	DESeq2	LRT	glmGamPoi	scranSumFactors
Pak1ip1	3dpi	-0.648085		333.787	1.2058e-05	0.000139532	-4.37654	-3.809	48.8146	pseudobulk	DESeq2	LRT	glmGamPoi	scranSumFactors
Eif3d	3dpi	-0.791151		222.642	1.20984e-05	0.000139822	-4.37581	-3.80848	48.7822	pseudobulk	DESeq2	LRT	glmGamPoi	scranSumFactors
Skint6	3dpi	-0.987482		95.3707	1.21009e-05	0.000139822	-4.37576	-3.80848	48.7802	pseudobulk	DESeq2	LRT	glmGamPoi	scranSumFactors
Gm17399	3dpi	0.949249		75.115	1.21029e-05	0.000139822	4.37573	3.80848	48.7786	pseudobulk	DESeq2	LRT	glmGamPoi	scranSumFactors
Rwdd1	3dpi	-0.678045		612.625	1.22196e-05	0.000141093	-4.37363	-3.80624	48.6858	pseudobulk	DESeq2	LRT	glmGamPoi	scranSumFactors
Tagln2	3dpi	-2.55766		20.4057	1.22527e-05	0.000141398	-4.37304	-3.80571	48.6597	pseudobulk	DESeq2	LRT	glmGamPoi	scranSumFactors
Nop16	3dpi	-1.10532		74.9922	1.22901e-05	0.000141752	-4.37238	-3.80509	48.6303	pseudobulk	DESeq2	LRT	glmGamPoi	scranSumFactors
Znhit3	3dpi	-0.806261		206.034	1.23233e-05	0.000142057	-4.37179	-3.80456	48.6043	pseudobulk	DESeq2	LRT	glmGamPoi	scranSumFactors
Pts	3dpi	-0.485032		306.817	1.23323e-05	0.000142084	-4.37163	-3.80451	48.5972	pseudobulk	DESeq2	LRT	glmGamPoi	scranSumFactors
Orai3	3dpi	-0.9662		64.8585	1.24271e-05	0.000143098	-4.36996	-3.80275	48.5233	pseudobulk	DESeq2	LRT	glmGamPoi	scranSumFactors
Cdc42ep4	3dpi	-0.994952		70.6988	1.24669e-05	0.000143477	-4.36926	-3.8021	48.4926	pseudobulk	DESeq2	LRT	glmGamPoi	scranSumFactors
Tmub1	3dpi	-1.03895		135.769	1.2485e-05	0.000143608	-4.36894	-3.80187	48.4786	pseudobulk	DESeq2	LRT	glmGamPoi	scranSumFactors
Prr13	3dpi	-0.74954		392.99	1.24924e-05	0.000143615	-4.36881	-3.80186	48.4729	pseudobulk	DESeq2	LRT	glmGamPoi	scranSumFactors
Cep250	3dpi	0.38679		616.34	1.25167e-05	0.00014374	4.36839	3.80164	48.4542	pseudobulk	DESeq2	LRT	glmGamPoi	scranSumFactors
Nop53	3dpi	-0.681076		185.189	1.25169e-05	0.00014374	-4.36839	-3.80164	48.4541	pseudobulk	DESeq2	LRT	glmGamPoi	scranSumFactors
Adck1	3dpi	0.480775		529.72	1.25255e-05	0.000143761	4.36823	3.80161	48.4474	pseudobulk	DESeq2	LRT	glmGamPoi	scranSumFactors
Drosha	3dpi	0.458443		636.144	1.25619e-05	0.0001441	4.3676	3.80102	48.4195	pseudobulk	DESeq2	LRT	glmGamPoi	scranSumFactors
Ackr3	3dpi	-1.14041		77.057	1.25753e-05	0.000144176	-4.36737	-3.80089	48.4093	pseudobulk	DESeq2	LRT	glmGamPoi	scranSumFactors
Cnp	3dpi	-1.08244		1038.79	1.26023e-05	0.000144407	-4.3669	-3.8005	48.3887	pseudobulk	DESeq2	LRT	glmGamPoi	scranSumFactors
Smim4	3dpi	-0.409191		473.438	1.26339e-05	0.00014469	-4.36635	-3.80001	48.3646	pseudobulk	DESeq2	LRT	glmGamPoi	scranSumFactors
Mrpl35	3dpi	-1.07097		178.719	1.26426e-05	0.000144711	-4.3662	-3.79997	48.358	pseudobulk	DESeq2	LRT	glmGamPoi	scranSumFactors
Ciao2b	3dpi	-1.00479		271.104	1.26497e-05	0.000144715	-4.36608	-3.79997	48.3525	pseudobulk	DESeq2	LRT	glmGamPoi	scranSumFactors
Myo16	3dpi	0.456094		1215.6	1.26603e-05	0.000144742	4.3659	3.79992	48.3445	pseudobulk	DESeq2	LRT	glmGamPoi	scranSumFactors
Gm14325	3dpi	-0.4877		324.872	1.26658e-05	0.000144742	-4.3658	-3.79992	48.3404	pseudobulk	DESeq2	LRT	glmGamPoi	scranSumFactors
Mrpl48	3dpi	-0.376178		664.895	1.26853e-05	0.000144886	-4.36547	-3.79967	48.3256	pseudobulk	DESeq2	LRT	glmGamPoi	scranSumFactors
Coro2a	3dpi	0.53917		459.903	1.27393e-05	0.000145425	4.36454	3.79876	48.2848	pseudobulk	DESeq2	LRT	glmGamPoi	scranSumFactors
D030047H15Rik	3dpi	-1.05309		321.81	1.27651e-05	0.000145641	-4.36409	-3.79839	48.2654	pseudobulk	DESeq2	LRT	glmGamPoi	scranSumFactors
Prn	3dpi	-0.601042		1219.67	1.27831e-05	0.000145768	-4.36378	-3.79817	48.2519	pseudobulk	DESeq2	LRT	glmGamPoi	scranSumFactors
ENSMUSG00000115423	3dpi	-2.17036		15.503	1.28003e-05	0.000145885	-4.36349	-3.79797	48.239	pseudobulk	DESeq2	LRT	glmGamPoi	scranSumFactors
Cript	3dpi	-0.485696		305.659	1.28532e-05	0.000146409	-4.36259	-3.79708	48.1995	pseudobulk	DESeq2	LRT	glmGamPoi	scranSumFactors
Arfgef3	3dpi	0.414598		1964.05	1.28626e-05	0.000146437	4.36243	3.79703	48.1924	pseudobulk	DESeq2	LRT	glmGamPoi	scranSumFactors
Plekhm3	3dpi	0.404058		1155.32	1.28732e-05	0.000146479	4.36225	3.79696	48.1845	pseudobulk	DESeq2	LRT	glmGamPoi	scranSumFactors
Mrpl50	3dpi	-0.811556		163.446	1.28828e-05	0.000146509	-4.36209	-3.79691	48.1774	pseudobulk	DESeq2	LRT	glmGamPoi	scranSumFactors
Mrpl33	3dpi	-0.664933		338.579	1.29718e-05	0.000147442	-4.36058	-3.79534	48.1115	pseudobulk	DESeq2	LRT	glmGamPoi	scranSumFactors
Tcerg1l	3dpi	0.645509		706.745	1.29871e-05	0.000147536	4.36032	3.79518	48.1003	pseudobulk	DESeq2	LRT	glmGamPoi	scranSumFactors
Plac9a	3dpi	-2.80851		16.5856	1.30149e-05	0.000147772	-4.35986	-3.79478	48.0798	pseudobulk	DESeq2	LRT	glmGamPoi	scranSumFactors
Pak3	3dpi	0.414205		4586.25	1.30294e-05	0.000147857	4.35961	3.79464	48.0692	pseudobulk	DESeq2	LRT	glmGamPoi	scranSumFactors
Ppp2r1a	3dpi	-0.596567		635.198	1.30388e-05	0.000147885	-4.35945	-3.79459	48.0623	pseudobulk	DESeq2	LRT	glmGamPoi	scranSumFactors
Pllp	3dpi	-1.28726		479.863	1.30933e-05	0.000148364	-4.35854	-3.79379	48.0224	pseudobulk	DESeq2	LRT	glmGamPoi	scranSumFactors
Pclo	3dpi	0.339136		7948.44	1.31015e-05	0.000148364	4.3584	3.79379	48.0164	pseudobulk	DESeq2	LRT	glmGamPoi	scranSumFactors
Rbms3	3dpi	0.550959		6802.35	1.31021e-05	0.000148364	4.35839	3.79379	48.016	pseudobulk	DESeq2	LRT	glmGamPoi	scranSumFactors
Rab39	3dpi	-0.917678		70.1688	1.31408e-05	0.000148722	-4.35775	-3.79319	47.9878	pseudobulk	DESeq2	LRT	glmGamPoi	scranSumFactors
Rnf187	3dpi	-0.997273		915.981	1.31884e-05	0.000149121	-4.35696	-3.79253	47.9533	pseudobulk	DESeq2	LRT	glmGamPoi	scranSumFactors
Per3	3dpi	-0.928258		87.5603	1.31901e-05	0.000149121	-4.35693	-3.79253	47.952	pseudobulk	DESeq2	LRT	glmGamPoi	scranSumFactors
Rab3gap2	3dpi	0.327452		1080.82	1.32588e-05	0.000149817	4.35579	3.79137	47.9025	pseudobulk	DESeq2	LRT	glmGamPoi	scranSumFactors
Smim1	3dpi	-1.15306		122.493	1.33189e-05	0.000150341	-4.3548	-3.7905	47.8594	pseudobulk	DESeq2	LRT	glmGamPoi	scranSumFactors
Itga1	3dpi	-0.924806		86.7753	1.33194e-05	0.000150341	-4.35479	-3.7905	47.859	pseudobulk	DESeq2	LRT	glmGamPoi	scranSumFactors
Churc1	3dpi	-0.747055		191.072	1.33398e-05	0.00015047	-4.35446	-3.79029	47.8445	pseudobulk	DESeq2	LRT	glmGamPoi	scranSumFactors
Tor1a	3dpi	-0.684038		232.633	1.33513e-05	0.00015047	-4.35427	-3.79029	47.8363	pseudobulk	DESeq2	LRT	glmGamPoi	scranSumFactors
Gm10282	3dpi	-0.822869		88.5899	1.33521e-05	0.00015047	-4.35425	-3.79029	47.8357	pseudobulk	DESeq2	LRT	glmGamPoi	scranSumFactors
Zfp148	3dpi	0.330661		2181.49	1.33755e-05	0.000150559	4.35387	3.79014	47.819	pseudobulk	DESeq2	LRT	glmGamPoi	scranSumFactors
Qk	3dpi	-0.917666		7362.17	1.33798e-05	0.000150559	-4.3538	-3.79014	47.816	pseudobulk	DESeq2	LRT	glmGamPoi	scranSumFactors
Nphp4	3dpi	0.503136		334.243	1.33815e-05	0.000150559	4.35377	3.79014	47.8148	pseudobulk	DESeq2	LRT	glmGamPoi	scranSumFactors
Tmem176a	3dpi	-1.47107		222.665	1.34441e-05	0.000151178	-4.35275	-3.78913	47.7703	pseudobulk	DESeq2	LRT	glmGamPoi	scranSumFactors
Mydgf	3dpi	-0.681837		372.644	1.34508e-05	0.000151178	-4.35264	-3.78913	47.7656	pseudobulk	DESeq2	LRT	glmGamPoi	scranSumFactors
Clic4	3dpi	-0.898103		463.269	1.34695e-05	0.000151308	-4.35234	-3.78891	47.7524	pseudobulk	DESeq2	LRT	glmGamPoi	scranSumFactors
Cops7a	3dpi	-0.616867		327.321	1.34845e-05	0.000151396	-4.35209	-3.78877	47.7418	pseudobulk	DESeq2	LRT	glmGamPoi	scranSumFactors
ENSMUSG00000091050	3dpi	-0.91981		97.9336	1.35004e-05	0.000151461	-4.35183	-3.78866	47.7306	pseudobulk	DESeq2	LRT	glmGamPoi	scranSumFactors
Gm41030	3dpi	-1.16619		41.942	1.35046e-05	0.000151461	-4.35176	-3.78866	47.7276	pseudobulk	DESeq2	LRT	glmGamPoi	scranSumFactors
ENSMUSG00000113358	3dpi	-1.08485		77.5259	1.35967e-05	0.000152413	-4.35028	-3.78711	47.6631	pseudobulk	DESeq2	LRT	glmGamPoi	scranSumFactors
Rps19bp1	3dpi	-1.02794		152.903	1.36144e-05	0.00015253	-4.34999	-3.78691	47.6507	pseudobulk	DESeq2	LRT	glmGamPoi	scranSumFactors
Rai1	3dpi	0.380178		1349.48	1.36239e-05	0.000152556	4.34984	3.78687	47.6441	pseudobulk	DESeq2	LRT	glmGamPoi	scranSumFactors
Cep350	3dpi	0.336488		2050.54	1.36406e-05	0.000152662	4.34957	3.7867	47.6325	pseudobulk	DESeq2	LRT	glmGamPoi	scranSumFactors
Cryzl2	3dpi	-1.29173		49.9329	1.36808e-05	0.000153031	-4.34892	-3.7861	47.6045	pseudobulk	DESeq2	LRT	glmGamPoi	scranSumFactors
Grhpr	3dpi	-0.857384		299.308	1.37468e-05	0.000153688	-4.34787	-3.78503	47.5589	pseudobulk	DESeq2	LRT	glmGamPoi	scranSumFactors
Trappc2	3dpi	-0.988831		213.823	1.38027e-05	0.000154192	-4.34698	-3.78422	47.5204	pseudobulk	DESeq2	LRT	glmGamPoi	scranSumFactors
4930432J09Rik	3dpi	-1.29705		45.6533	1.38065e-05	0.000154192	-4.34692	-3.78422	47.5179	pseudobulk	DESeq2	LRT	glmGamPoi	scranSumFactors
Ccser1	3dpi	0.325801		16379.6	1.38572e-05	0.000154676	4.34611	3.78344	47.4832	pseudobulk	DESeq2	LRT	glmGamPoi	scranSumFactors
Ermn	3dpi	-1.18004		428.366	1.39423e-05	0.000155545	-4.34477	-3.78205	47.4252	pseudobulk	DESeq2	LRT	glmGamPoi	scranSumFactors
Ablim2	3dpi	0.443585		1743.02	1.40009e-05	0.000156116	4.34385	3.78113	47.3855	pseudobulk	DESeq2	LRT	glmGamPoi	scranSumFactors
Myl6b	3dpi	-1.08597		50.051	1.40194e-05	0.000156239	-4.34356	-3.78094	47.3731	pseudobulk	DESeq2	LRT	glmGamPoi	scranSumFactors
Hsdl2	3dpi	-0.633972		218.096	1.40665e-05	0.000156682	-4.34282	-3.78023	47.3414	pseudobulk	DESeq2	LRT	glmGamPoi	scranSumFactors
ENSMUSG00000113029	3dpi	-1.17045		255.663	1.41208e-05	0.000157203	-4.34198	-3.77941	47.3051	pseudobulk	DESeq2	LRT	glmGamPoi	scranSumFactors
Rarres2	3dpi	-2.24725		86.5608	1.41293e-05	0.000157215	-4.34184	-3.77939	47.2994	pseudobulk	DESeq2	LRT	glmGamPoi	scranSumFactors
Cpq	3dpi	-0.748096		982.096	1.4167e-05	0.000157551	-4.34126	-3.77885	47.2743	pseudobulk	DESeq2	LRT	glmGamPoi	scranSumFactors
Dlg5	3dpi	0.404812		709.949	1.42229e-05	0.000158091	4.34039	3.778	47.2371	pseudobulk	DESeq2	LRT	glmGamPoi	scranSumFactors
Renbp	3dpi	-2.03575		25.4822	1.42402e-05	0.000158199	-4.34012	-3.77783	47.2256	pseudobulk	DESeq2	LRT	glmGamPoi	scranSumFactors
Cep120	3dpi	0.334458		918.982	1.42983e-05	0.000158682	4.33923	3.77707	47.1872	pseudobulk	DESeq2	LRT	glmGamPoi	scranSumFactors
Imp3	3dpi	-0.717717		329.16	1.42986e-05	0.000158682	-4.33922	-3.77707	47.187	pseudobulk	DESeq2	LRT	glmGamPoi	scranSumFactors
Vstm4	3dpi	-1.36745		54.8153	1.43356e-05	0.000159008	-4.33866	-3.77656	47.1628	pseudobulk	DESeq2	LRT	glmGamPoi	scranSumFactors
Ccdc152	3dpi	-1.21404		37.8496	1.43934e-05	0.000159565	-4.33777	-3.77569	47.1249	pseudobulk	DESeq2	LRT	glmGamPoi	scranSumFactors
Soga1	3dpi	0.474557		788.725	1.4421e-05	0.000159788	4.33735	3.77534	47.1069	pseudobulk	DESeq2	LRT	glmGamPoi	scranSumFactors
Smim11	3dpi	-0.839259		188.168	1.44422e-05	0.000159937	-4.33703	-3.77511	47.093	pseudobulk	DESeq2	LRT	glmGamPoi	scranSumFactors
Hdhd3	3dpi	-1.25795		34.9256	1.44496e-05	0.000159937	-4.33692	-3.77511	47.0882	pseudobulk	DESeq2	LRT	glmGamPoi	scranSumFactors
Hps4	3dpi	-0.407028		662.224	1.44637e-05	0.00016001	-4.3367	-3.775	47.079	pseudobulk	DESeq2	LRT	glmGamPoi	scranSumFactors
4933406I18Rik	3dpi	0.31889		2024.69	1.45325e-05	0.000160686	4.33566	3.77395	47.0345	pseudobulk	DESeq2	LRT	glmGamPoi	scranSumFactors
ENSMUSG00000091475	3dpi	-0.883083		158.891	1.46018e-05	0.000161368	-4.33461	-3.77289	46.9898	pseudobulk	DESeq2	LRT	glmGamPoi	scranSumFactors
Tapbp	3dpi	-0.601616		180.545	1.4613e-05	0.000161408	-4.33444	-3.77283	46.9826	pseudobulk	DESeq2	LRT	glmGamPoi	scranSumFactors
ENSMUSG00000116763	3dpi	-1.23277		89.8724	1.46304e-05	0.000161515	-4.33418	-3.77266	46.9714	pseudobulk	DESeq2	LRT	glmGamPoi	scranSumFactors
Ylpm1	3dpi	0.389265		2498.21	1.4698e-05	0.000162177	4.33317	3.77164	46.9281	pseudobulk	DESeq2	LRT	glmGamPoi	scranSumFactors
4930598N05Rik	3dpi	0.710943		411.042	1.47102e-05	0.000162226	4.33298	3.77157	46.9204	pseudobulk	DESeq2	LRT	glmGamPoi	scranSumFactors
Tanc2	3dpi	0.282644		8131.01	1.4863e-05	0.000163827	4.33071	3.76912	46.8236	pseudobulk	DESeq2	LRT	glmGamPoi	scranSumFactors
1700037H04Rik	3dpi	-0.951133		196.236	1.48876e-05	0.000164012	-4.33034	-3.76883	46.8081	pseudobulk	DESeq2	LRT	glmGamPoi	scranSumFactors
Thsd7b	3dpi	0.40458		3622.28	1.49149e-05	0.000164217	4.32994	3.76852	46.791	pseudobulk	DESeq2	LRT	glmGamPoi	scranSumFactors
Ppp1r12b	3dpi	0.380759		2659.33	1.49218e-05	0.000164217	4.32984	3.76852	46.7867	pseudobulk	DESeq2	LRT	glmGamPoi	scranSumFactors
Gpr34	3dpi	-1.34913		51.8903	1.49402e-05	0.000164335	-4.32957	-3.76834	46.7751	pseudobulk	DESeq2	LRT	glmGamPoi	scranSumFactors
B230217C12Rik	3dpi	-0.761487		336.764	1.49716e-05	0.000164534	-4.32911	-3.76804	46.7555	pseudobulk	DESeq2	LRT	glmGamPoi	scranSumFactors
Smpd1	3dpi	-0.88061		389.14	1.49739e-05	0.000164534	-4.32907	-3.76804	46.754	pseudobulk	DESeq2	LRT	glmGamPoi	scranSumFactors
Agap2	3dpi	0.570969		361.597	1.50253e-05	0.000165013	4.32832	3.76731	46.722	pseudobulk	DESeq2	LRT	glmGamPoi	scranSumFactors
Macrod2	3dpi	0.384825		18642.4	1.50915e-05	0.000165654	4.32735	3.76635	46.681	pseudobulk	DESeq2	LRT	glmGamPoi	scranSumFactors
Ftx	3dpi	0.357918		3615.96	1.5181e-05	0.00016655	4.32604	3.765	46.6257	pseudobulk	DESeq2	LRT	glmGamPoi	scranSumFactors
Acaa2	3dpi	-0.814079		98.4432	1.52027e-05	0.000166695	-4.32573	-3.76478	46.6124	pseudobulk	DESeq2	LRT	glmGamPoi	scranSumFactors
Mrps31	3dpi	-0.733043		287.321	1.52101e-05	0.000166695	-4.32562	-3.76478	46.6079	pseudobulk	DESeq2	LRT	glmGamPoi	scranSumFactors
Rpusd1	3dpi	-0.777825		180.934	1.52201e-05	0.000166719	-4.32548	-3.76475	46.6018	pseudobulk	DESeq2	LRT	glmGamPoi	scranSumFactors
Slco1c1	3dpi	-1.59277		192.756	1.53134e-05	0.000167654	-4.32413	-3.76335	46.5448	pseudobulk	DESeq2	LRT	glmGamPoi	scranSumFactors
Notch1	3dpi	-1.14014		126.899	1.54037e-05	0.000168555	-4.32284	-3.76201	46.4901	pseudobulk	DESeq2	LRT	glmGamPoi	scranSumFactors
Tmem229a	3dpi	-1.05195		205.234	1.54175e-05	0.000168618	-4.32264	-3.76191	46.4818	pseudobulk	DESeq2	LRT	glmGamPoi	scranSumFactors
Alms1-ps2	3dpi	-1.13515		67.0653	1.54753e-05	0.000169164	-4.32181	-3.76111	46.4469	pseudobulk	DESeq2	LRT	glmGamPoi	scranSumFactors
Khdrbs2	3dpi	0.353259		5049.05	1.54872e-05	0.000169206	4.32164	3.76104	46.4398	pseudobulk	DESeq2	LRT	glmGamPoi	scranSumFactors
Gramd3	3dpi	-1.05054		324.817	1.55012e-05	0.000169272	-4.32144	-3.76095	46.4314	pseudobulk	DESeq2	LRT	glmGamPoi	scranSumFactors
Tmem37	3dpi	-3.15365		9.74013	1.55175e-05	0.000169286	-4.32121	-3.76092	46.4216	pseudobulk	DESeq2	LRT	glmGamPoi	scranSumFactors
Elavl3	3dpi	0.428433		2998.82	1.55186e-05	0.000169286	4.3212	3.76092	46.421	pseudobulk	DESeq2	LRT	glmGamPoi	scranSumFactors
Eif3c	3dpi	-0.773534		741.438	1.55341e-05	0.000169302	-4.32098	-3.7609	46.4117	pseudobulk	DESeq2	LRT	glmGamPoi	scranSumFactors
Lsm2	3dpi	-0.858905		122.65	1.55361e-05	0.000169302	-4.32095	-3.7609	46.4105	pseudobulk	DESeq2	LRT	glmGamPoi	scranSumFactors
Tmem106c	3dpi	-0.955221		210.31	1.56016e-05	0.000169802	-4.32002	-3.76016	46.3714	pseudobulk	DESeq2	LRT	glmGamPoi	scranSumFactors
Smc5	3dpi	0.309635		1237.92	1.56067e-05	0.000169802	4.31995	3.76016	46.3684	pseudobulk	DESeq2	LRT	glmGamPoi	scranSumFactors
Pou2f3	3dpi	-1.30191		31.9913	1.56122e-05	0.000169802	-4.31987	-3.76016	46.3651	pseudobulk	DESeq2	LRT	glmGamPoi	scranSumFactors
Cdk2ap2	3dpi	-0.913899		156.801	1.5614e-05	0.000169802	-4.31984	-3.76016	46.364	pseudobulk	DESeq2	LRT	glmGamPoi	scranSumFactors
Gm16833	3dpi	-1.09554		80.9485	1.57155e-05	0.000170817	-4.31841	-3.75867	46.3039	pseudobulk	DESeq2	LRT	glmGamPoi	scranSumFactors
ENSMUSG00000118135	3dpi	-0.777834		584.278	1.57812e-05	0.000171443	-4.31749	-3.75776	46.2652	pseudobulk	DESeq2	LRT	glmGamPoi	scranSumFactors
Ankrd12	3dpi	0.311272		4224.5	1.58839e-05	0.00017247	4.31606	3.75626	46.2051	pseudobulk	DESeq2	LRT	glmGamPoi	scranSumFactors
Rrbp1	3dpi	-0.383831		805.78	1.59187e-05	0.000172709	-4.31558	-3.75591	46.1849	pseudobulk	DESeq2	LRT	glmGamPoi	scranSumFactors
Map7d1	3dpi	-0.347556		770.051	1.59224e-05	0.000172709	-4.31553	-3.75591	46.1827	pseudobulk	DESeq2	LRT	glmGamPoi	scranSumFactors
Ssbp1	3dpi	-0.614576		465.442	1.59363e-05	0.000172709	-4.31533	-3.75591	46.1746	pseudobulk	DESeq2	LRT	glmGamPoi	scranSumFactors
Ttc27	3dpi	0.397486		513.801	1.59386e-05	0.000172709	4.3153	3.75591	46.1733	pseudobulk	DESeq2	LRT	glmGamPoi	scranSumFactors
Nabp2	3dpi	-0.534209		375.125	1.59991e-05	0.000173276	-4.31446	-3.75509	46.1382	pseudobulk	DESeq2	LRT	glmGamPoi	scranSumFactors
Galnt18	3dpi	0.781662		1706.08	1.60269e-05	0.000173488	4.31408	3.75479	46.1222	pseudobulk	DESeq2	LRT	glmGamPoi	scranSumFactors
Dock3	3dpi	0.266987		7160.55	1.61141e-05	0.000174341	4.31288	3.75356	46.072	pseudobulk	DESeq2	LRT	glmGamPoi	scranSumFactors
Sdf2	3dpi	-0.626599		852.94	1.61222e-05	0.000174341	-4.31277	-3.75356	46.0674	pseudobulk	DESeq2	LRT	glmGamPoi	scranSumFactors
Rab27a	3dpi	0.519755		649.723	1.62697e-05	0.000175814	4.31076	3.75145	45.9833	pseudobulk	DESeq2	LRT	glmGamPoi	scranSumFactors
Ifi30	3dpi	-1.32336		30.4725	1.6275e-05	0.000175814	-4.31068	-3.75145	45.9803	pseudobulk	DESeq2	LRT	glmGamPoi	scranSumFactors
Polr2m	3dpi	-0.636301		488.98	1.62899e-05	0.000175884	-4.31048	-3.75135	45.9719	pseudobulk	DESeq2	LRT	glmGamPoi	scranSumFactors
Slc35e4	3dpi	-0.658354		142.257	1.62997e-05	0.0001759	-4.31035	-3.75133	45.9663	pseudobulk	DESeq2	LRT	glmGamPoi	scranSumFactors
Nap1l5	3dpi	-1.07397		4391.92	1.63657e-05	0.000176523	-4.30945	-3.75044	45.9291	pseudobulk	DESeq2	LRT	glmGamPoi	scranSumFactors
Hnrnpk	3dpi	-0.632191		1145.23	1.63932e-05	0.000176728	-4.30908	-3.75015	45.9136	pseudobulk	DESeq2	LRT	glmGamPoi	scranSumFactors
Hexb	3dpi	-0.600238		403.785	1.64297e-05	0.000177032	-4.30859	-3.74972	45.8931	pseudobulk	DESeq2	LRT	glmGamPoi	scranSumFactors
Gm11353	3dpi	-1.49386		27.8632	1.64692e-05	0.000177367	-4.30806	-3.74925	45.871	pseudobulk	DESeq2	LRT	glmGamPoi	scranSumFactors
Bcas2	3dpi	-0.679397		786.89	1.65516e-05	0.000178164	-4.30696	-3.74812	45.8251	pseudobulk	DESeq2	LRT	glmGamPoi	scranSumFactors
ENSMUSG00000113764	3dpi	-1.12361		43.8477	1.65669e-05	0.000178238	-4.30675	-3.74802	45.8166	pseudobulk	DESeq2	LRT	glmGamPoi	scranSumFactors
Ier2	3dpi	-1.65101		43.1	1.65797e-05	0.000178285	-4.30658	-3.74795	45.8095	pseudobulk	DESeq2	LRT	glmGamPoi	scranSumFactors
Mrps25	3dpi	-0.528629		388.046	1.66212e-05	0.000178639	-4.30603	-3.74745	45.7865	pseudobulk	DESeq2	LRT	glmGamPoi	scranSumFactors
Irx1	3dpi	-2.18359		32.9141	1.66565e-05	0.000178847	-4.30556	-3.74716	45.767	pseudobulk	DESeq2	LRT	glmGamPoi	scranSumFactors
Mrpl2	3dpi	-0.81362		271.157	1.66574e-05	0.000178847	-4.30555	-3.74716	45.7665	pseudobulk	DESeq2	LRT	glmGamPoi	scranSumFactors
Dock7	3dpi	0.372124		2647.56	1.66778e-05	0.000178975	4.30528	3.74698	45.7553	pseudobulk	DESeq2	LRT	glmGamPoi	scranSumFactors
Jakmip2	3dpi	0.296857		2798.99	1.67485e-05	0.000179643	4.30434	3.74605	45.7164	pseudobulk	DESeq2	LRT	glmGamPoi	scranSumFactors
A330023F24Rik	3dpi	0.315277		3759.81	1.67587e-05	0.000179661	4.3042	3.74602	45.7108	pseudobulk	DESeq2	LRT	glmGamPoi	scranSumFactors
Puf60	3dpi	-0.553062		702.363	1.6809e-05	0.000180109	-4.30354	-3.7454	45.6833	pseudobulk	DESeq2	LRT	glmGamPoi	scranSumFactors
Ostc	3dpi	-0.884796		655.115	1.68462e-05	0.000180415	-4.30305	-3.74497	45.663	pseudobulk	DESeq2	LRT	glmGamPoi	scranSumFactors
Rab2a	3dpi	-0.386373		2273.28	1.68651e-05	0.000180526	-4.3028	-3.74482	45.6528	pseudobulk	DESeq2	LRT	glmGamPoi	scranSumFactors
Sema4d	3dpi	0.341756		962.829	1.68996e-05	0.000180805	4.30235	3.74443	45.634	pseudobulk	DESeq2	LRT	glmGamPoi	scranSumFactors
Mapkbp1	3dpi	0.374698		795.875	1.69295e-05	0.000180979	4.30196	3.74419	45.6178	pseudobulk	DESeq2	LRT	glmGamPoi	scranSumFactors
Gcat	3dpi	-1.42484		26.414	1.69347e-05	0.000180979	-4.30189	-3.74419	45.615	pseudobulk	DESeq2	LRT	glmGamPoi	scranSumFactors
Ndfip1	3dpi	-0.899755		7572.65	1.69416e-05	0.000180979	-4.3018	-3.74419	45.6112	pseudobulk	DESeq2	LRT	glmGamPoi	scranSumFactors
Cr2	3dpi	-1.2656		66.8794	1.69818e-05	0.000181317	-4.30127	-3.74372	45.5895	pseudobulk	DESeq2	LRT	glmGamPoi	scranSumFactors
Synj1	3dpi	0.308891		1778.88	1.70292e-05	0.000181668	4.30066	3.74323	45.564	pseudobulk	DESeq2	LRT	glmGamPoi	scranSumFactors
ENSMUSG00000092595	3dpi	-0.822284		358.657	1.7032e-05	0.000181668	-4.30062	-3.74323	45.5625	pseudobulk	DESeq2	LRT	glmGamPoi	scranSumFactors
Csmd2	3dpi	0.405827		3524.86	1.7051e-05	0.00018178	4.30037	3.74308	45.5523	pseudobulk	DESeq2	LRT	glmGamPoi	scranSumFactors
ENSMUSG00000079511	3dpi	-0.718105		204.627	1.7065e-05	0.000181837	-4.30019	-3.743	45.5448	pseudobulk	DESeq2	LRT	glmGamPoi	scranSumFactors
Med21	3dpi	-0.709546		376.208	1.70756e-05	0.000181859	-4.30005	-3.74297	45.5391	pseudobulk	DESeq2	LRT	glmGamPoi	scranSumFactors
Hagh	3dpi	-0.528561		824.504	1.71017e-05	0.000182022	-4.29972	-3.74274	45.5251	pseudobulk	DESeq2	LRT	glmGamPoi	scranSumFactors
Lrrn2	3dpi	0.504605		953.006	1.71082e-05	0.000182022	4.29963	3.74274	45.5216	pseudobulk	DESeq2	LRT	glmGamPoi	scranSumFactors
Dnajc11	3dpi	0.369157		638.002	1.71348e-05	0.000182213	4.29929	3.74248	45.5074	pseudobulk	DESeq2	LRT	glmGamPoi	scranSumFactors
Nars	3dpi	-0.705218		897.829	1.71904e-05	0.000182712	-4.29857	-3.74179	45.4778	pseudobulk	DESeq2	LRT	glmGamPoi	scranSumFactors
Gm14586	3dpi	-0.99391		144.322	1.72187e-05	0.000182912	-4.29821	-3.74152	45.4628	pseudobulk	DESeq2	LRT	glmGamPoi	scranSumFactors
Mcf2l	3dpi	0.468503		1288.6	1.72294e-05	0.000182912	4.29807	3.74152	45.4571	pseudobulk	DESeq2	LRT	glmGamPoi	scranSumFactors
Lamtor3	3dpi	-0.505901		383.235	1.72351e-05	0.000182912	-4.29799	-3.74152	45.4541	pseudobulk	DESeq2	LRT	glmGamPoi	scranSumFactors
H1f0	3dpi	-1.252		180.249	1.72447e-05	0.000182922	-4.29787	-3.7415	45.449	pseudobulk	DESeq2	LRT	glmGamPoi	scranSumFactors
Traf4	3dpi	-0.895467		91.1401	1.72832e-05	0.000183239	-4.29738	-3.74107	45.4286	pseudobulk	DESeq2	LRT	glmGamPoi	scranSumFactors
ENSMUSG00000084849	3dpi	-0.925708		548.625	1.73362e-05	0.000183708	-4.2967	-3.74043	45.4007	pseudobulk	DESeq2	LRT	glmGamPoi	scranSumFactors
Rad51b	3dpi	-0.719918		211.945	1.73449e-05	0.000183708	-4.29659	-3.74043	45.3961	pseudobulk	DESeq2	LRT	glmGamPoi	scranSumFactors
Cd38	3dpi	-1.67102		140.521	1.73707e-05	0.00018389	-4.29626	-3.74018	45.3825	pseudobulk	DESeq2	LRT	glmGamPoi	scranSumFactors
ENSMUSG00000110202	3dpi	-1.03907		134.142	1.75699e-05	0.000185905	-4.29373	-3.73744	45.2785	pseudobulk	DESeq2	LRT	glmGamPoi	scranSumFactors
Prrc2b	3dpi	0.291817		1560.77	1.76846e-05	0.000187025	4.29228	3.73593	45.2193	pseudobulk	DESeq2	LRT	glmGamPoi	scranSumFactors
Hes1	3dpi	-1.31467		95.1607	1.77402e-05	0.000187519	-4.29158	-3.73526	45.1907	pseudobulk	DESeq2	LRT	glmGamPoi	scranSumFactors
[truncated: 19,141 more rows]

## Sheet: 7dpi - DEGs across all
genes	dpi	logFC	lfcSE	baseMean	PValue	FDR	Z	Za	stat	method	package	test	fit	sizeFactor
Atp5k	7dpi	-1.11715		834.311	2.29988e-09	2.96099e-05	-5.97507	-4.17645	198.575	pseudobulk	DESeq2	LRT	glmGamPoi	scranSumFactors
Uqcr11	7dpi	-1.01282		1081.13	2.80251e-09	2.96099e-05	-5.94277	-4.17645	192.384	pseudobulk	DESeq2	LRT	glmGamPoi	scranSumFactors
Cst3	7dpi	-1.15506		11212.1	4.2934e-09	3.02413e-05	-5.87247	-4.17164	179.636	pseudobulk	DESeq2	LRT	glmGamPoi	scranSumFactors
Cox7c	7dpi	-1.01641		2531.23	6.70651e-09	3.54288e-05	-5.79811	-4.13543	167.155	pseudobulk	DESeq2	LRT	glmGamPoi	scranSumFactors
Dynll1	7dpi	-1.01337		1573.14	9.85993e-09	3.64787e-05	-5.73312	-4.12872	157.026	pseudobulk	DESeq2	LRT	glmGamPoi	scranSumFactors
ENSMUSG00000112437	7dpi	-0.834879		1431.17	1.10042e-08	3.64787e-05	-5.71448	-4.12872	154.246	pseudobulk	DESeq2	LRT	glmGamPoi	scranSumFactors
Atp5md	7dpi	-0.931526		1562.21	1.34577e-08	3.64787e-05	-5.68015	-4.12872	149.268	pseudobulk	DESeq2	LRT	glmGamPoi	scranSumFactors
Ndufa3	7dpi	-0.937467		832.335	1.45523e-08	3.64787e-05	-5.66676	-4.12872	147.375	pseudobulk	DESeq2	LRT	glmGamPoi	scranSumFactors
Atp5e	7dpi	-1.0114		1074.31	1.55368e-08	3.64787e-05	-5.65553	-4.12872	145.807	pseudobulk	DESeq2	LRT	glmGamPoi	scranSumFactors
Fndc7	7dpi	-0.988396		220.039	1.77444e-08	3.74854e-05	-5.63267	-4.12246	142.672	pseudobulk	DESeq2	LRT	glmGamPoi	scranSumFactors
Chchd2	7dpi	-1.12887		2834.47	2.46505e-08	3.74854e-05	-5.57572	-4.12246	135.179	pseudobulk	DESeq2	LRT	glmGamPoi	scranSumFactors
Cox8a	7dpi	-0.853169		3866.79	2.62202e-08	3.74854e-05	-5.56497	-4.12246	133.813	pseudobulk	DESeq2	LRT	glmGamPoi	scranSumFactors
Cox6b1	7dpi	-1.04333		1771.8	2.81302e-08	3.74854e-05	-5.55269	-4.12246	132.272	pseudobulk	DESeq2	LRT	glmGamPoi	scranSumFactors
Ndufb3	7dpi	-0.840966		999.969	2.85886e-08	3.74854e-05	-5.54987	-4.12246	131.92	pseudobulk	DESeq2	LRT	glmGamPoi	scranSumFactors
Dynlrb1	7dpi	-0.796514		690.557	2.92379e-08	3.74854e-05	-5.54594	-4.12246	131.433	pseudobulk	DESeq2	LRT	glmGamPoi	scranSumFactors
Tomm7	7dpi	-0.986306		660.892	2.96198e-08	3.74854e-05	-5.54367	-4.12246	131.152	pseudobulk	DESeq2	LRT	glmGamPoi	scranSumFactors
Cox7a2	7dpi	-0.922055		1860	3.01572e-08	3.74854e-05	-5.54052	-4.12246	130.764	pseudobulk	DESeq2	LRT	glmGamPoi	scranSumFactors
Ndufs5	7dpi	-1.06408		712.242	3.53312e-08	4.14768e-05	-5.51273	-4.0991	127.389	pseudobulk	DESeq2	LRT	glmGamPoi	scranSumFactors
Uqcrq	7dpi	-0.862725		1462.97	4.1119e-08	4.57308e-05	-5.48598	-4.07644	124.231	pseudobulk	DESeq2	LRT	glmGamPoi	scranSumFactors
Cox17	7dpi	-0.818761		707.167	4.77982e-08	4.87068e-05	-5.45931	-4.06175	121.168	pseudobulk	DESeq2	LRT	glmGamPoi	scranSumFactors
Ndufab1	7dpi	-0.97339		1152.06	4.84049e-08	4.87068e-05	-5.45707	-4.06175	120.914	pseudobulk	DESeq2	LRT	glmGamPoi	scranSumFactors
ENSMUSG00000102657	7dpi	0.688646		1207.57	5.41077e-08	5.19704e-05	5.43725	4.04658	118.697	pseudobulk	DESeq2	LRT	glmGamPoi	scranSumFactors
Atp5j2	7dpi	-0.842367		2065.97	5.77622e-08	5.30684e-05	-5.42559	-4.04169	117.412	pseudobulk	DESeq2	LRT	glmGamPoi	scranSumFactors
ENSMUSG00000111846	7dpi	-0.859512		346.961	6.52968e-08	5.74911e-05	-5.40365	-4.02288	115.037	pseudobulk	DESeq2	LRT	glmGamPoi	scranSumFactors
Gm19522	7dpi	-0.99341		278.518	7.317e-08	6.18462e-05	-5.38321	-4.00565	112.87	pseudobulk	DESeq2	LRT	glmGamPoi	scranSumFactors
Txn1	7dpi	-0.842993		555.322	8.09795e-08	6.58145e-05	-5.36493	-3.99093	110.972	pseudobulk	DESeq2	LRT	glmGamPoi	scranSumFactors
Dbi	7dpi	-0.867938		1538.34	8.56802e-08	6.70559e-05	-5.35474	-3.9865	109.927	pseudobulk	DESeq2	LRT	glmGamPoi	scranSumFactors
Ndufc1	7dpi	-0.942546		1076.19	8.9992e-08	6.7915e-05	-5.34585	-3.98347	109.026	pseudobulk	DESeq2	LRT	glmGamPoi	scranSumFactors
Cycs	7dpi	-1.11254		1059.23	9.71855e-08	7.08147e-05	-5.33191	-3.97353	107.628	pseudobulk	DESeq2	LRT	glmGamPoi	scranSumFactors
Chchd10	7dpi	-1.05893		1871.23	1.04202e-07	7.12751e-05	-5.31924	-3.97199	106.374	pseudobulk	DESeq2	LRT	glmGamPoi	scranSumFactors
Serf2	7dpi	-0.703972		1257.11	1.04563e-07	7.12751e-05	-5.31861	-3.97199	106.312	pseudobulk	DESeq2	LRT	glmGamPoi	scranSumFactors
Atp5o	7dpi	-1.00146		1334.7	1.11519e-07	7.36217e-05	-5.30688	-3.96427	105.167	pseudobulk	DESeq2	LRT	glmGamPoi	scranSumFactors
Ddt	7dpi	-0.956634		371.93	1.17034e-07	7.36217e-05	-5.29807	-3.96427	104.315	pseudobulk	DESeq2	LRT	glmGamPoi	scranSumFactors
Cox5a	7dpi	-0.912387		2290.52	1.18458e-07	7.36217e-05	-5.29586	-3.96427	104.103	pseudobulk	DESeq2	LRT	glmGamPoi	scranSumFactors
Pltp	7dpi	-1.33614		119.322	1.3372e-07	7.42466e-05	-5.27367	-3.96225	101.996	pseudobulk	DESeq2	LRT	glmGamPoi	scranSumFactors
Ndufb2	7dpi	-0.85694		1185.33	1.35845e-07	7.42466e-05	-5.27078	-3.96225	101.724	pseudobulk	DESeq2	LRT	glmGamPoi	scranSumFactors
Atp5l	7dpi	-0.783924		1646.89	1.37178e-07	7.42466e-05	-5.26899	-3.96225	101.557	pseudobulk	DESeq2	LRT	glmGamPoi	scranSumFactors
1700030F04Rik	7dpi	-0.840742		1422.67	1.57347e-07	7.42466e-05	-5.24375	-3.96225	99.2267	pseudobulk	DESeq2	LRT	glmGamPoi	scranSumFactors
ENSMUSG00000104710	7dpi	-0.896726		208.226	1.60245e-07	7.42466e-05	-5.24038	-3.96225	98.9203	pseudobulk	DESeq2	LRT	glmGamPoi	scranSumFactors
Snrpg	7dpi	-0.743539		444.929	1.61665e-07	7.42466e-05	-5.23875	-3.96225	98.7724	pseudobulk	DESeq2	LRT	glmGamPoi	scranSumFactors
Uqcr10	7dpi	-0.759077		1373.17	1.62249e-07	7.42466e-05	-5.23809	-3.96225	98.7121	pseudobulk	DESeq2	LRT	glmGamPoi	scranSumFactors
Mrps33	7dpi	-0.858313		655.826	1.62283e-07	7.42466e-05	-5.23805	-3.96225	98.7086	pseudobulk	DESeq2	LRT	glmGamPoi	scranSumFactors
Itm2a	7dpi	-1.19739		136.916	1.64002e-07	7.42466e-05	-5.2361	-3.96225	98.5325	pseudobulk	DESeq2	LRT	glmGamPoi	scranSumFactors
Krtcap2	7dpi	-0.821595		877.538	1.65179e-07	7.42466e-05	-5.23478	-3.96225	98.4131	pseudobulk	DESeq2	LRT	glmGamPoi	scranSumFactors
Uqcrb	7dpi	-0.978576		1249.64	1.66519e-07	7.42466e-05	-5.23329	-3.96225	98.2783	pseudobulk	DESeq2	LRT	glmGamPoi	scranSumFactors
Sh3bgrl3	7dpi	-0.818011		569.804	1.6875e-07	7.42466e-05	-5.23083	-3.96225	98.0567	pseudobulk	DESeq2	LRT	glmGamPoi	scranSumFactors
Fabp5	7dpi	-1.08736		1057.71	1.73468e-07	7.42466e-05	-5.22573	-3.96225	97.599	pseudobulk	DESeq2	LRT	glmGamPoi	scranSumFactors
Actb	7dpi	-0.953774		6856.25	1.74379e-07	7.42466e-05	-5.22476	-3.96225	97.5122	pseudobulk	DESeq2	LRT	glmGamPoi	scranSumFactors
Mt3	7dpi	-0.736987		3767.42	1.76966e-07	7.42466e-05	-5.22204	-3.96225	97.2688	pseudobulk	DESeq2	LRT	glmGamPoi	scranSumFactors
Atp5mpl	7dpi	-0.892235		1049.38	1.82529e-07	7.42466e-05	-5.2163	-3.96225	96.7589	pseudobulk	DESeq2	LRT	glmGamPoi	scranSumFactors
Atp5g1	7dpi	-0.873166		2014.84	1.85165e-07	7.42466e-05	-5.21365	-3.96225	96.5234	pseudobulk	DESeq2	LRT	glmGamPoi	scranSumFactors
Cox5b	7dpi	-0.86337		2013.99	1.87938e-07	7.42466e-05	-5.21089	-3.96225	96.2798	pseudobulk	DESeq2	LRT	glmGamPoi	scranSumFactors
Rps29	7dpi	-0.918082		1246.24	1.9059e-07	7.42466e-05	-5.20829	-3.96225	96.0508	pseudobulk	DESeq2	LRT	glmGamPoi	scranSumFactors
Polr2f	7dpi	-0.715524		447.709	1.93084e-07	7.42466e-05	-5.20588	-3.96225	95.8387	pseudobulk	DESeq2	LRT	glmGamPoi	scranSumFactors
ENSMUSG00000098078	7dpi	-0.914209		1090.49	1.9325e-07	7.42466e-05	-5.20572	-3.96225	95.8247	pseudobulk	DESeq2	LRT	glmGamPoi	scranSumFactors
Stmn1	7dpi	-0.934366		3141.29	1.96781e-07	7.42532e-05	-5.20235	-3.96223	95.53	pseudobulk	DESeq2	LRT	glmGamPoi	scranSumFactors
Gng5	7dpi	-1.09342		256.167	2.02225e-07	7.49687e-05	-5.19728	-3.95994	95.0874	pseudobulk	DESeq2	LRT	glmGamPoi	scranSumFactors
Cops9	7dpi	-0.749656		572.023	2.21439e-07	7.92828e-05	-5.18038	-3.94656	93.6283	pseudobulk	DESeq2	LRT	glmGamPoi	scranSumFactors
Fdps	7dpi	-1.15316		458.902	2.27626e-07	7.92828e-05	-5.17523	-3.94656	93.1892	pseudobulk	DESeq2	LRT	glmGamPoi	scranSumFactors
Ndufa7	7dpi	-0.875028		1132.17	2.29166e-07	7.92828e-05	-5.17397	-3.94656	93.0821	pseudobulk	DESeq2	LRT	glmGamPoi	scranSumFactors
Fkbp1a	7dpi	-0.688934		1360.43	2.29526e-07	7.92828e-05	-5.17368	-3.94656	93.0572	pseudobulk	DESeq2	LRT	glmGamPoi	scranSumFactors
Rplp2	7dpi	-0.838025		1811.8	2.38768e-07	7.92828e-05	-5.1663	-3.94656	92.4322	pseudobulk	DESeq2	LRT	glmGamPoi	scranSumFactors
1810037I17Rik	7dpi	-0.856696		607.23	2.38923e-07	7.92828e-05	-5.16618	-3.94656	92.4219	pseudobulk	DESeq2	LRT	glmGamPoi	scranSumFactors
Ndufa1	7dpi	-0.965759		722.09	2.40126e-07	7.92828e-05	-5.16524	-3.94656	92.3427	pseudobulk	DESeq2	LRT	glmGamPoi	scranSumFactors
Ubl5	7dpi	-0.926698		1236.79	2.56866e-07	8.23961e-05	-5.15262	-3.93732	91.2852	pseudobulk	DESeq2	LRT	glmGamPoi	scranSumFactors
Romo1	7dpi	-0.987413		638.353	2.57354e-07	8.23961e-05	-5.15227	-3.93732	91.2556	pseudobulk	DESeq2	LRT	glmGamPoi	scranSumFactors
Pttg1	7dpi	-0.740038		368.105	2.87605e-07	8.95661e-05	-5.13139	-3.91725	89.5355	pseudobulk	DESeq2	LRT	glmGamPoi	scranSumFactors
Atp5j	7dpi	-0.834198		1968.05	2.88226e-07	8.95661e-05	-5.13099	-3.91725	89.5024	pseudobulk	DESeq2	LRT	glmGamPoi	scranSumFactors
Ndufb10	7dpi	-0.887267		1090.58	2.9637e-07	9.07623e-05	-5.12574	-3.91405	89.0757	pseudobulk	DESeq2	LRT	glmGamPoi	scranSumFactors
Rpl27	7dpi	-0.943632		1000.77	3.12552e-07	9.43506e-05	-5.11572	-3.90468	88.2667	pseudobulk	DESeq2	LRT	glmGamPoi	scranSumFactors
Cox4i1	7dpi	-0.870425		2619.27	3.22552e-07	9.53957e-05	-5.10977	-3.90201	87.7906	pseudobulk	DESeq2	LRT	glmGamPoi	scranSumFactors
Ndufa4	7dpi	-0.88703		3233.23	3.25043e-07	9.53957e-05	-5.10832	-3.90201	87.6746	pseudobulk	DESeq2	LRT	glmGamPoi	scranSumFactors
Polr1d	7dpi	-0.698837		506.37	3.30513e-07	9.56361e-05	-5.10516	-3.9014	87.4234	pseudobulk	DESeq2	LRT	glmGamPoi	scranSumFactors
Ndufb4	7dpi	-0.965408		663.091	3.36868e-07	9.56361e-05	-5.10156	-3.9014	87.1376	pseudobulk	DESeq2	LRT	glmGamPoi	scranSumFactors
Rps17	7dpi	-0.911939		818.026	3.40105e-07	9.56361e-05	-5.09975	-3.9014	86.9944	pseudobulk	DESeq2	LRT	glmGamPoi	scranSumFactors
Ndufb1	7dpi	-0.729977		987.472	3.55222e-07	9.56361e-05	-5.09151	-3.9014	86.3458	pseudobulk	DESeq2	LRT	glmGamPoi	scranSumFactors
Mrps36	7dpi	-0.861757		389.274	3.55771e-07	9.56361e-05	-5.09122	-3.9014	86.3228	pseudobulk	DESeq2	LRT	glmGamPoi	scranSumFactors
Cox6a1	7dpi	-0.711735		1010.18	3.62624e-07	9.56361e-05	-5.0876	-3.9014	86.0396	pseudobulk	DESeq2	LRT	glmGamPoi	scranSumFactors
Tsix	7dpi	-0.883935		1305.42	3.68656e-07	9.56361e-05	-5.08447	-3.9014	85.7954	pseudobulk	DESeq2	LRT	glmGamPoi	scranSumFactors
Tmem258	7dpi	-0.812428		593.648	3.68683e-07	9.56361e-05	-5.08446	-3.9014	85.7943	pseudobulk	DESeq2	LRT	glmGamPoi	scranSumFactors
Mrpl30	7dpi	-0.709466		413.136	3.71237e-07	9.56361e-05	-5.08314	-3.9014	85.6923	pseudobulk	DESeq2	LRT	glmGamPoi	scranSumFactors
Tagln3	7dpi	-0.951657		1245.53	3.79618e-07	9.56361e-05	-5.0789	-3.9014	85.3632	pseudobulk	DESeq2	LRT	glmGamPoi	scranSumFactors
Snrpe	7dpi	-0.774767		523.313	3.7998e-07	9.56361e-05	-5.07872	-3.9014	85.3492	pseudobulk	DESeq2	LRT	glmGamPoi	scranSumFactors
Gm10177	7dpi	-1.05097		133.961	3.80173e-07	9.56361e-05	-5.07863	-3.9014	85.3417	pseudobulk	DESeq2	LRT	glmGamPoi	scranSumFactors
Taf10	7dpi	-0.945241		294.964	3.98564e-07	9.82588e-05	-5.06964	-3.89485	84.649	pseudobulk	DESeq2	LRT	glmGamPoi	scranSumFactors
Myl6	7dpi	-0.731513		1655.04	3.99899e-07	9.82588e-05	-5.06901	-3.89485	84.6002	pseudobulk	DESeq2	LRT	glmGamPoi	scranSumFactors
Rn18s-rs5	7dpi	-1.15015		39490.6	4.10823e-07	9.90503e-05	-5.06387	-3.89291	84.2074	pseudobulk	DESeq2	LRT	glmGamPoi	scranSumFactors
Cox6c	7dpi	-0.799323		2519.16	4.12495e-07	9.90503e-05	-5.0631	-3.89291	84.1483	pseudobulk	DESeq2	LRT	glmGamPoi	scranSumFactors
ENSMUSG00000114150	7dpi	-0.776104		522.903	4.26615e-07	0.00010129	-5.05668	-3.88748	83.6604	pseudobulk	DESeq2	LRT	glmGamPoi	scranSumFactors
Cox7b	7dpi	-0.720894		1915.99	4.39073e-07	0.000103089	-5.05119	-3.8832	83.245	pseudobulk	DESeq2	LRT	glmGamPoi	scranSumFactors
Ndufb7	7dpi	-0.802271		898.598	4.5403e-07	0.00010543	-5.04479	-3.87774	82.7639	pseudobulk	DESeq2	LRT	glmGamPoi	scranSumFactors
ENSMUSG00000089729	7dpi	-0.90647		261.965	4.84698e-07	0.000110167	-5.03227	-3.86703	81.8321	pseudobulk	DESeq2	LRT	glmGamPoi	scranSumFactors
Ndufb6	7dpi	-0.949838		635.82	4.84859e-07	0.000110167	-5.03221	-3.86703	81.8274	pseudobulk	DESeq2	LRT	glmGamPoi	scranSumFactors
Ndufa2	7dpi	-0.717408		1010.81	4.96819e-07	0.000111684	-5.02754	-3.8637	81.4824	pseudobulk	DESeq2	LRT	glmGamPoi	scranSumFactors
Ndufa5	7dpi	-0.882891		1267.46	5.15065e-07	0.000113555	-5.02061	-3.85964	80.974	pseudobulk	DESeq2	LRT	glmGamPoi	scranSumFactors
Rpl38	7dpi	-0.93713		1731.29	5.15889e-07	0.000113555	-5.02031	-3.85964	80.9516	pseudobulk	DESeq2	LRT	glmGamPoi	scranSumFactors
Coa3	7dpi	-0.911608		598.126	5.4394e-07	0.000118495	-5.01013	-3.84922	80.2105	pseudobulk	DESeq2	LRT	glmGamPoi	scranSumFactors
Abhd15	7dpi	-0.656029		579.611	5.49857e-07	0.000118561	-5.00805	-3.84908	80.0598	pseudobulk	DESeq2	LRT	glmGamPoi	scranSumFactors
Erh	7dpi	-0.580088		702.89	5.81132e-07	0.000124039	-4.99738	-3.838	79.293	pseudobulk	DESeq2	LRT	glmGamPoi	scranSumFactors
Fmc1	7dpi	-0.743944		416.791	5.98558e-07	0.000126481	-4.99168	-3.83321	78.8861	pseudobulk	DESeq2	LRT	glmGamPoi	scranSumFactors
Atp5g2	7dpi	-0.769697		745.634	6.36865e-07	0.000133244	-4.97969	-3.82038	78.0377	pseudobulk	DESeq2	LRT	glmGamPoi	scranSumFactors
Atp6v1f	7dpi	-0.953848		1177.52	6.57007e-07	0.00013611	-4.97366	-3.81513	77.6149	pseudobulk	DESeq2	LRT	glmGamPoi	scranSumFactors
Fyb	7dpi	-0.833864		229.815	6.64711e-07	0.000136369	-4.9714	-3.81466	77.457	pseudobulk	DESeq2	LRT	glmGamPoi	scranSumFactors
ENSMUSG00000108563	7dpi	-0.774122		625.922	6.79702e-07	0.000138104	-4.96708	-3.81154	77.1559	pseudobulk	DESeq2	LRT	glmGamPoi	scranSumFactors
Atox1	7dpi	-0.805127		522.444	7.08806e-07	0.000142576	-4.95894	-3.80366	76.5925	pseudobulk	DESeq2	LRT	glmGamPoi	scranSumFactors
Dock8	7dpi	-0.88218		179.735	7.1927e-07	0.000142576	-4.95609	-3.80366	76.3964	pseudobulk	DESeq2	LRT	glmGamPoi	scranSumFactors
Zfp706	7dpi	-0.8035		510.915	7.23835e-07	0.000142576	-4.95486	-3.80366	76.3119	pseudobulk	DESeq2	LRT	glmGamPoi	scranSumFactors
Mrpl34	7dpi	-0.889271		283.156	7.29938e-07	0.000142576	-4.95322	-3.80366	76.1999	pseudobulk	DESeq2	LRT	glmGamPoi	scranSumFactors
Rpl23a	7dpi	-1.00047		360.477	7.35452e-07	0.000142576	-4.95176	-3.80366	76.0996	pseudobulk	DESeq2	LRT	glmGamPoi	scranSumFactors
ENSMUSG00000114036	7dpi	-0.663163		357.505	7.57143e-07	0.000144284	-4.9461	-3.80071	75.7133	pseudobulk	DESeq2	LRT	glmGamPoi	scranSumFactors
Smdt1	7dpi	-0.739573		980.677	7.61812e-07	0.000144284	-4.9449	-3.80071	75.6318	pseudobulk	DESeq2	LRT	glmGamPoi	scranSumFactors
Tyrobp	7dpi	-1.63977		34.5414	7.65304e-07	0.000144284	-4.94401	-3.80071	75.5712	pseudobulk	DESeq2	LRT	glmGamPoi	scranSumFactors
Ppia	7dpi	-0.968939		6160.4	7.74519e-07	0.000144284	-4.94168	-3.80071	75.4129	pseudobulk	DESeq2	LRT	glmGamPoi	scranSumFactors
Mdk	7dpi	-0.979385		226.811	7.78538e-07	0.000144284	-4.94067	-3.80071	75.3445	pseudobulk	DESeq2	LRT	glmGamPoi	scranSumFactors
Mrpl27	7dpi	-0.692394		373.166	7.8523e-07	0.000144284	-4.939	-3.80071	75.2315	pseudobulk	DESeq2	LRT	glmGamPoi	scranSumFactors
Mcee	7dpi	-0.658528		263.123	7.99549e-07	0.000145649	-4.93548	-3.79837	74.9935	pseudobulk	DESeq2	LRT	glmGamPoi	scranSumFactors
Etfb	7dpi	-0.666603		252.092	8.35227e-07	0.000149898	-4.92695	-3.79124	74.4212	pseudobulk	DESeq2	LRT	glmGamPoi	scranSumFactors
Polr2l	7dpi	-0.888353		333.554	8.37064e-07	0.000149898	-4.92652	-3.79124	74.3925	pseudobulk	DESeq2	LRT	glmGamPoi	scranSumFactors
ENSMUSG00000116358	7dpi	-0.875559		2383.1	8.55095e-07	0.00015184	-4.92235	-3.78804	74.1145	pseudobulk	DESeq2	LRT	glmGamPoi	scranSumFactors
Pigbos1	7dpi	-0.99066		126.2	8.7966e-07	0.000153964	-4.91681	-3.78459	73.7465	pseudobulk	DESeq2	LRT	glmGamPoi	scranSumFactors
Sec61b	7dpi	-0.895566		363.898	8.81628e-07	0.000153964	-4.91637	-3.78459	73.7176	pseudobulk	DESeq2	LRT	glmGamPoi	scranSumFactors
C1qb	7dpi	-1.55871		91.3447	9.27421e-07	0.000160634	-4.90644	-3.77403	73.0638	pseudobulk	DESeq2	LRT	glmGamPoi	scranSumFactors
P2ry12	7dpi	-0.801332		318.637	9.64703e-07	0.000165733	-4.89871	-3.76623	72.5584	pseudobulk	DESeq2	LRT	glmGamPoi	scranSumFactors
Cfl1	7dpi	-0.836202		1541.52	9.97852e-07	0.000168808	-4.89206	-3.76163	72.1275	pseudobulk	DESeq2	LRT	glmGamPoi	scranSumFactors
Ndufa12	7dpi	-0.697143		949.227	1.00228e-06	0.000168808	-4.89119	-3.76163	72.0711	pseudobulk	DESeq2	LRT	glmGamPoi	scranSumFactors
Ndufa13	7dpi	-0.771025		1843.8	1.00657e-06	0.000168808	-4.89035	-3.76163	72.0169	pseudobulk	DESeq2	LRT	glmGamPoi	scranSumFactors
Phpt1	7dpi	-0.916738		280.89	1.02989e-06	0.000169872	-4.88584	-3.76006	71.7264	pseudobulk	DESeq2	LRT	glmGamPoi	scranSumFactors
Ndufs8	7dpi	-0.76447		408.732	1.0299e-06	0.000169872	-4.88584	-3.76006	71.7264	pseudobulk	DESeq2	LRT	glmGamPoi	scranSumFactors
Wdr83os	7dpi	-0.907288		437.682	1.03703e-06	0.000169872	-4.88448	-3.76006	71.6391	pseudobulk	DESeq2	LRT	glmGamPoi	scranSumFactors
Bloc1s1	7dpi	-0.832037		395.975	1.04772e-06	0.000170303	-4.88246	-3.75943	71.5094	pseudobulk	DESeq2	LRT	glmGamPoi	scranSumFactors
ENSMUSG00000104208	7dpi	-1.07438		106.709	1.0606e-06	0.00017108	-4.88005	-3.75829	71.3553	pseudobulk	DESeq2	LRT	glmGamPoi	scranSumFactors
Gm10175	7dpi	-0.925046		486.998	1.07065e-06	0.000171394	-4.87819	-3.75783	71.2365	pseudobulk	DESeq2	LRT	glmGamPoi	scranSumFactors
Cd63	7dpi	-0.969556		930.134	1.12668e-06	0.000177738	-4.86811	-3.74872	70.597	pseudobulk	DESeq2	LRT	glmGamPoi	scranSumFactors
Pfn1	7dpi	-0.747984		653.012	1.12855e-06	0.000177738	-4.86779	-3.74872	70.5762	pseudobulk	DESeq2	LRT	glmGamPoi	scranSumFactors
Ptma	7dpi	-0.743078		1807.44	1.14096e-06	0.000177738	-4.86562	-3.74872	70.4398	pseudobulk	DESeq2	LRT	glmGamPoi	scranSumFactors
Mrps21	7dpi	-0.609408		544.775	1.14393e-06	0.000177738	-4.86511	-3.74872	70.4074	pseudobulk	DESeq2	LRT	glmGamPoi	scranSumFactors
Lxn	7dpi	-1.30331		110.922	1.17336e-06	0.00018098	-4.86008	-3.74418	70.0915	pseudobulk	DESeq2	LRT	glmGamPoi	scranSumFactors
Atp6v1g1	7dpi	-0.721314		772.965	1.20612e-06	0.000184685	-4.85463	-3.73909	69.7504	pseudobulk	DESeq2	LRT	glmGamPoi	scranSumFactors
Gm7135	7dpi	-0.735785		237.672	1.24933e-06	0.000189925	-4.84765	-3.73205	69.3164	pseudobulk	DESeq2	LRT	glmGamPoi	scranSumFactors
Rpl35	7dpi	-0.803886		1223.09	1.26082e-06	0.000190303	-4.84583	-3.73155	69.2039	pseudobulk	DESeq2	LRT	glmGamPoi	scranSumFactors
Polr2k	7dpi	-0.718946		388.35	1.28546e-06	0.000192645	-4.84199	-3.72847	68.9666	pseudobulk	DESeq2	LRT	glmGamPoi	scranSumFactors
Prdx1	7dpi	-0.777696		1344.93	1.30455e-06	0.000192886	-4.83906	-3.72816	68.7863	pseudobulk	DESeq2	LRT	glmGamPoi	scranSumFactors
Atp5h	7dpi	-0.792999		1930.85	1.30532e-06	0.000192886	-4.83894	-3.72816	68.7791	pseudobulk	DESeq2	LRT	glmGamPoi	scranSumFactors
Peak1	7dpi	-0.460436		1703.44	1.31779e-06	0.000193377	-4.83705	-3.72752	68.663	pseudobulk	DESeq2	LRT	glmGamPoi	scranSumFactors
Ramp2	7dpi	-0.559354		350.127	1.34354e-06	0.0001947	-4.8332	-3.7258	68.4274	pseudobulk	DESeq2	LRT	glmGamPoi	scranSumFactors
ENSMUSG00000118471	7dpi	-1.2887		100.487	1.34523e-06	0.0001947	-4.83295	-3.7258	68.412	pseudobulk	DESeq2	LRT	glmGamPoi	scranSumFactors
Anapc11	7dpi	-0.560454		467.396	1.3727e-06	0.000197323	-4.82893	-3.72242	68.1667	pseudobulk	DESeq2	LRT	glmGamPoi	scranSumFactors
Ost4	7dpi	-0.773774		380.413	1.41707e-06	0.000202325	-4.82259	-3.7161	67.7819	pseudobulk	DESeq2	LRT	glmGamPoi	scranSumFactors
ENSMUSG00000054391	7dpi	-0.605748		709.079	1.45351e-06	0.000206135	-4.81752	-3.71138	67.4762	pseudobulk	DESeq2	LRT	glmGamPoi	scranSumFactors
Anapc13	7dpi	-0.770972		247.691	1.49785e-06	0.000211008	-4.81152	-3.70546	67.1158	pseudobulk	DESeq2	LRT	glmGamPoi	scranSumFactors
Rpl36al	7dpi	-0.841808		914.221	1.53246e-06	0.000214453	-4.80696	-3.70135	66.8431	pseudobulk	DESeq2	LRT	glmGamPoi	scranSumFactors
Vps29	7dpi	-0.698013		939.737	1.59236e-06	0.00022137	-4.79928	-3.69329	66.3872	pseudobulk	DESeq2	LRT	glmGamPoi	scranSumFactors
ENSMUSG00000093497	7dpi	-0.773098		682.922	1.65867e-06	0.000229081	-4.7911	-3.68458	65.9051	pseudobulk	DESeq2	LRT	glmGamPoi	scranSumFactors
Ndufa11	7dpi	-0.762778		1305.28	1.6842e-06	0.000231096	-4.78804	-3.68235	65.7254	pseudobulk	DESeq2	LRT	glmGamPoi	scranSumFactors
ENSMUSG00000052291	7dpi	-0.717881		1726.99	1.71324e-06	0.000233565	-4.7846	-3.67964	65.5246	pseudobulk	DESeq2	LRT	glmGamPoi	scranSumFactors
Cd9	7dpi	-0.884728		932.58	1.74691e-06	0.000236629	-4.78069	-3.67631	65.2968	pseudobulk	DESeq2	LRT	glmGamPoi	scranSumFactors
H2bc4	7dpi	-1.30088		153.015	1.76015e-06	0.000236902	-4.77918	-3.67602	65.2086	pseudobulk	DESeq2	LRT	glmGamPoi	scranSumFactors
Ndufs3	7dpi	-0.541203		1136.58	1.79431e-06	0.000239409	-4.77531	-3.67333	64.9845	pseudobulk	DESeq2	LRT	glmGamPoi	scranSumFactors
Nop10	7dpi	-0.877764		730.714	1.80316e-06	0.000239409	-4.77432	-3.67333	64.9273	pseudobulk	DESeq2	LRT	glmGamPoi	scranSumFactors
Sec11c	7dpi	-0.781038		1324.14	1.82028e-06	0.000239409	-4.77242	-3.67333	64.8174	pseudobulk	DESeq2	LRT	glmGamPoi	scranSumFactors
Nme1	7dpi	-1.00614		882.846	1.82849e-06	0.000239409	-4.77151	-3.67333	64.7651	pseudobulk	DESeq2	LRT	glmGamPoi	scranSumFactors
Cr2	7dpi	-1.31318		64.2613	1.83542e-06	0.000239409	-4.77075	-3.67333	64.7213	pseudobulk	DESeq2	LRT	glmGamPoi	scranSumFactors
Rplp0	7dpi	-0.684686		612.308	1.85803e-06	0.000240872	-4.76828	-3.67177	64.5793	pseudobulk	DESeq2	LRT	glmGamPoi	scranSumFactors
ENSMUSG00000104302	7dpi	-0.531388		807.422	1.88556e-06	0.00024295	-4.76532	-3.66958	64.4092	pseudobulk	DESeq2	LRT	glmGamPoi	scranSumFactors
Ttc9b	7dpi	-0.882386		220.071	1.91809e-06	0.000245644	-4.76187	-3.66676	64.2118	pseudobulk	DESeq2	LRT	glmGamPoi	scranSumFactors
Cavin3	7dpi	-0.970601		155.734	1.96915e-06	0.000250145	-4.75657	-3.66211	63.9096	pseudobulk	DESeq2	LRT	glmGamPoi	scranSumFactors
S100a16	7dpi	-0.920774		314.173	1.98159e-06	0.000250145	-4.75529	-3.66211	63.8374	pseudobulk	DESeq2	LRT	glmGamPoi	scranSumFactors
Mif	7dpi	-0.925617		1916.76	1.99901e-06	0.000250145	-4.75352	-3.66211	63.737	pseudobulk	DESeq2	LRT	glmGamPoi	scranSumFactors
ENSMUSG00000087431	7dpi	-1.32067		71.0381	2.00123e-06	0.000250145	-4.7533	-3.66211	63.7243	pseudobulk	DESeq2	LRT	glmGamPoi	scranSumFactors
Ndufc2	7dpi	-0.866319		1947.57	2.01243e-06	0.000250145	-4.75217	-3.66211	63.6604	pseudobulk	DESeq2	LRT	glmGamPoi	scranSumFactors
ENSMUSG00000092625	7dpi	-0.747264		224.454	2.03645e-06	0.00025165	-4.74977	-3.66058	63.5248	pseudobulk	DESeq2	LRT	glmGamPoi	scranSumFactors
Nedd8	7dpi	-0.706526		1204.5	2.09451e-06	0.00025732	-4.74408	-3.65486	63.2044	pseudobulk	DESeq2	LRT	glmGamPoi	scranSumFactors
Vmn2r-ps21	7dpi	-0.924365		105.037	2.11442e-06	0.000258265	-4.74217	-3.65392	63.0969	pseudobulk	DESeq2	LRT	glmGamPoi	scranSumFactors
Cyba	7dpi	-1.3554		64.1134	2.12698e-06	0.000258306	-4.74097	-3.65388	63.0297	pseudobulk	DESeq2	LRT	glmGamPoi	scranSumFactors
Txnl4a.1	7dpi	-0.559688		654.69	2.16192e-06	0.000259676	-4.73767	-3.65252	62.845	pseudobulk	DESeq2	LRT	glmGamPoi	scranSumFactors
Ly6c1	7dpi	-1.9666		64.427	2.16284e-06	0.000259676	-4.73758	-3.65252	62.8402	pseudobulk	DESeq2	LRT	glmGamPoi	scranSumFactors
ENSMUSG00000110741	7dpi	-0.672561		788.325	2.18249e-06	0.000260555	-4.73575	-3.65166	62.7379	pseudobulk	DESeq2	LRT	glmGamPoi	scranSumFactors
Tmsb4x	7dpi	-0.747618		2870.81	2.24094e-06	0.00026603	-4.73039	-3.64631	62.4398	pseudobulk	DESeq2	LRT	glmGamPoi	scranSumFactors
Mrpl17	7dpi	-0.722805		378.449	2.25968e-06	0.000266756	-4.72869	-3.64561	62.3461	pseudobulk	DESeq2	LRT	glmGamPoi	scranSumFactors
Grcc10	7dpi	-0.870323		652.456	2.32179e-06	0.000272566	-4.72318	-3.64007	62.0418	pseudobulk	DESeq2	LRT	glmGamPoi	scranSumFactors
Ubb	7dpi	-1.05314		9404.72	2.44822e-06	0.000285819	-4.7124	-3.62782	61.4505	pseudobulk	DESeq2	LRT	glmGamPoi	scranSumFactors
ENSMUSG00000114359	7dpi	-0.627838		303.486	2.49573e-06	0.000287133	-4.70848	-3.62664	61.2373	pseudobulk	DESeq2	LRT	glmGamPoi	scranSumFactors
Oaz1	7dpi	-0.69487		1868.64	2.49575e-06	0.000287133	-4.70848	-3.62664	61.2372	pseudobulk	DESeq2	LRT	glmGamPoi	scranSumFactors
Tmsb10	7dpi	-0.986241		3546.28	2.51337e-06	0.000287133	-4.70704	-3.62664	61.1593	pseudobulk	DESeq2	LRT	glmGamPoi	scranSumFactors
Ndufb11	7dpi	-0.75929		1122.46	2.51382e-06	0.000287133	-4.70701	-3.62664	61.1573	pseudobulk	DESeq2	LRT	glmGamPoi	scranSumFactors
Fabp3	7dpi	-0.796037		446.793	2.56093e-06	0.000290941	-4.70322	-3.62323	60.9522	pseudobulk	DESeq2	LRT	glmGamPoi	scranSumFactors
Commd1	7dpi	-0.628417		241.091	2.5786e-06	0.000291382	-4.70181	-3.62284	60.8764	pseudobulk	DESeq2	LRT	glmGamPoi	scranSumFactors
Gsdme	7dpi	-0.541481		1200.45	2.60379e-06	0.000292089	-4.69983	-3.62222	60.7693	pseudobulk	DESeq2	LRT	glmGamPoi	scranSumFactors
ENSMUSG00000085754	7dpi	-0.794441		179.953	2.61584e-06	0.000292089	-4.69889	-3.62222	60.7185	pseudobulk	DESeq2	LRT	glmGamPoi	scranSumFactors
Uqcrfs1	7dpi	-0.809115		653.924	2.62633e-06	0.000292089	-4.69807	-3.62222	60.6745	pseudobulk	DESeq2	LRT	glmGamPoi	scranSumFactors
Fabp7	7dpi	-1.61326		101.596	2.67538e-06	0.000295944	-4.69429	-3.61882	60.4714	pseudobulk	DESeq2	LRT	glmGamPoi	scranSumFactors
ENSMUSG00000108880	7dpi	0.504601		2106.8	2.70101e-06	0.000295944	4.69234	3.61882	60.367	pseudobulk	DESeq2	LRT	glmGamPoi	scranSumFactors
Arpc3	7dpi	-0.633837		630.982	2.703e-06	0.000295944	-4.69219	-3.61882	60.3589	pseudobulk	DESeq2	LRT	glmGamPoi	scranSumFactors
Ptn	7dpi	-0.744824		3136.44	2.73943e-06	0.000298386	-4.68945	-3.6167	60.2126	pseudobulk	DESeq2	LRT	glmGamPoi	scranSumFactors
Pglyrp3	7dpi	-0.968206		122.743	2.76972e-06	0.000300138	-4.6872	-3.61518	60.0926	pseudobulk	DESeq2	LRT	glmGamPoi	scranSumFactors
ENSMUSG00000098202	7dpi	0.52334		2191.22	2.80863e-06	0.000302488	4.68434	3.61316	59.9407	pseudobulk	DESeq2	LRT	glmGamPoi	scranSumFactors
Cuta	7dpi	-0.736028		537.153	2.82285e-06	0.000302488	-4.68331	-3.61316	59.8857	pseudobulk	DESeq2	LRT	glmGamPoi	scranSumFactors
ENSMUSG00000093383	7dpi	-0.823794		1595.5	2.83435e-06	0.000302488	-4.68247	-3.61316	59.8415	pseudobulk	DESeq2	LRT	glmGamPoi	scranSumFactors
1110008P14Rik	7dpi	-0.827496		401.77	2.8534e-06	0.000302991	-4.6811	-3.61273	59.7688	pseudobulk	DESeq2	LRT	glmGamPoi	scranSumFactors
Calm2	7dpi	-0.66626		4998.2	2.91026e-06	0.000307484	-4.67705	-3.60891	59.5549	pseudobulk	DESeq2	LRT	glmGamPoi	scranSumFactors
Thrsp	7dpi	-0.803409		122.581	2.96809e-06	0.000312033	-4.67302	-3.6051	59.3423	pseudobulk	DESeq2	LRT	glmGamPoi	scranSumFactors
Usp50	7dpi	-0.593383		668.029	3.00884e-06	0.000313946	-4.67022	-3.60351	59.1954	pseudobulk	DESeq2	LRT	glmGamPoi	scranSumFactors
4930480K15Rik	7dpi	-0.731171		160.324	3.03891e-06	0.000313946	-4.66817	-3.60351	59.0884	pseudobulk	DESeq2	LRT	glmGamPoi	scranSumFactors
Elob	7dpi	-0.80336		2142.76	3.04235e-06	0.000313946	-4.66794	-3.60351	59.0762	pseudobulk	DESeq2	LRT	glmGamPoi	scranSumFactors
Uqcc2	7dpi	-0.714829		847.73	3.05273e-06	0.000313946	-4.66724	-3.60351	59.0396	pseudobulk	DESeq2	LRT	glmGamPoi	scranSumFactors
Enho	7dpi	-0.673827		483.105	3.06057e-06	0.000313946	-4.66671	-3.60351	59.0121	pseudobulk	DESeq2	LRT	glmGamPoi	scranSumFactors
Park7	7dpi	-0.66875		964.89	3.1524e-06	0.000321804	-4.66063	-3.59708	58.6953	pseudobulk	DESeq2	LRT	glmGamPoi	scranSumFactors
Gabarap	7dpi	-0.748803		804.68	3.20825e-06	0.00032593	-4.65702	-3.59377	58.5078	pseudobulk	DESeq2	LRT	glmGamPoi	scranSumFactors
Gabarapl2	7dpi	-0.731527		1909.99	3.23621e-06	0.000327198	-4.65523	-3.59276	58.4153	pseudobulk	DESeq2	LRT	glmGamPoi	scranSumFactors
Naa38	7dpi	-0.81742		251.393	3.27001e-06	0.000329041	-4.65309	-3.59129	58.3047	pseudobulk	DESeq2	LRT	glmGamPoi	scranSumFactors
Rps13	7dpi	-0.825385		1200.41	3.29897e-06	0.000330381	-4.65127	-3.59023	58.211	pseudobulk	DESeq2	LRT	glmGamPoi	scranSumFactors
Miat	7dpi	0.540993		2113.04	3.38477e-06	0.000335947	4.64597	3.58588	57.9389	pseudobulk	DESeq2	LRT	glmGamPoi	scranSumFactors
Tmco1	7dpi	-0.593377		746.382	3.41002e-06	0.000335947	-4.64444	-3.58588	57.8604	pseudobulk	DESeq2	LRT	glmGamPoi	scranSumFactors
Far1os	7dpi	-0.666282		243.243	3.4142e-06	0.000335947	-4.64419	-3.58588	57.8474	pseudobulk	DESeq2	LRT	glmGamPoi	scranSumFactors
Mrpl36	7dpi	-0.7619		223.859	3.41813e-06	0.000335947	-4.64395	-3.58588	57.8352	pseudobulk	DESeq2	LRT	glmGamPoi	scranSumFactors
Ndufb8	7dpi	-0.77635		1523.69	3.52936e-06	0.000345273	-4.63733	-3.57873	57.4978	pseudobulk	DESeq2	LRT	glmGamPoi	scranSumFactors
Atp5g3	7dpi	-0.780286		1798.07	3.60174e-06	0.00035073	-4.63313	-3.57463	57.2848	pseudobulk	DESeq2	LRT	glmGamPoi	scranSumFactors
ENSMUSG00000112169	7dpi	0.611558		218.053	3.63969e-06	0.000350771	4.63096	3.57459	57.175	pseudobulk	DESeq2	LRT	glmGamPoi	scranSumFactors
Mrpl14	7dpi	-0.596079		333.019	3.64013e-06	0.000350771	-4.63094	-3.57459	57.1738	pseudobulk	DESeq2	LRT	glmGamPoi	scranSumFactors
Cmss1	7dpi	-0.520061		1755.33	3.65196e-06	0.000350771	-4.63027	-3.57459	57.1398	pseudobulk	DESeq2	LRT	glmGamPoi	scranSumFactors
Sumo2	7dpi	-0.569525		1604.01	3.69477e-06	0.000353277	-4.62785	-3.57273	57.0181	pseudobulk	DESeq2	LRT	glmGamPoi	scranSumFactors
ENSMUSG00000086067	7dpi	-0.645749		485.121	3.71768e-06	0.000353867	-4.62657	-3.57229	56.9536	pseudobulk	DESeq2	LRT	glmGamPoi	scranSumFactors
Eif5a	7dpi	-0.828584		861.221	3.78887e-06	0.000356608	-4.62264	-3.57027	56.7561	pseudobulk	DESeq2	LRT	glmGamPoi	scranSumFactors
Cldn10	7dpi	-0.905944		649.362	3.80208e-06	0.000356608	-4.62192	-3.57027	56.7199	pseudobulk	DESeq2	LRT	glmGamPoi	scranSumFactors
Dad1	7dpi	-0.836922		1303.65	3.8198e-06	0.000356608	-4.62095	-3.57027	56.6716	pseudobulk	DESeq2	LRT	glmGamPoi	scranSumFactors
Sem1	7dpi	-0.600048		993.76	3.82682e-06	0.000356608	-4.62057	-3.57027	56.6525	pseudobulk	DESeq2	LRT	glmGamPoi	scranSumFactors
Tpt1	7dpi	-0.765604		1929.18	3.8352e-06	0.000356608	-4.62012	-3.57027	56.6298	pseudobulk	DESeq2	LRT	glmGamPoi	scranSumFactors
Uqcrh	7dpi	-0.604111		1433.34	3.84775e-06	0.000356608	-4.61944	-3.57027	56.5959	pseudobulk	DESeq2	LRT	glmGamPoi	scranSumFactors
Psmb5	7dpi	-0.819945		770.999	3.9258e-06	0.000362253	-4.61527	-3.56616	56.3879	pseudobulk	DESeq2	LRT	glmGamPoi	scranSumFactors
4930469K13Rik	7dpi	-0.785111		210.309	3.97237e-06	0.000364958	-4.61282	-3.56421	56.266	pseudobulk	DESeq2	LRT	glmGamPoi	scranSumFactors
Calm1	7dpi	-0.72245		4044.67	3.9932e-06	0.000365283	-4.61174	-3.56397	56.212	pseudobulk	DESeq2	LRT	glmGamPoi	scranSumFactors
4930455C13Rik	7dpi	-0.857439		120.448	4.0114e-06	0.000365366	-4.61079	-3.56391	56.1651	pseudobulk	DESeq2	LRT	glmGamPoi	scranSumFactors
ENSMUSG00000043340	7dpi	-0.538938		299.631	4.07885e-06	0.000368853	-4.60732	-3.56142	55.9934	pseudobulk	DESeq2	LRT	glmGamPoi	scranSumFactors
Tbcb	7dpi	-0.780269		623.318	4.0846e-06	0.000368853	-4.60703	-3.56142	55.979	pseudobulk	DESeq2	LRT	glmGamPoi	scranSumFactors
Ndufs6	7dpi	-0.754218		597.683	4.12358e-06	0.000370461	-4.60505	-3.56028	55.8814	pseudobulk	DESeq2	LRT	glmGamPoi	scranSumFactors
Ywhah	7dpi	-0.835354		1921.98	4.13747e-06	0.000370461	-4.60435	-3.56028	55.8469	pseudobulk	DESeq2	LRT	glmGamPoi	scranSumFactors
Pde4d	7dpi	0.386172		17904.5	4.16589e-06	0.000371432	4.60293	3.55959	55.7767	pseudobulk	DESeq2	LRT	glmGamPoi	scranSumFactors
Cryab	7dpi	-1.34515		759.435	4.31137e-06	0.000382788	-4.59578	-3.55167	55.4257	pseudobulk	DESeq2	LRT	glmGamPoi	scranSumFactors
Prdx5	7dpi	-0.734331		1294.26	4.33374e-06	0.000383164	-4.5947	-3.55142	55.3729	pseudobulk	DESeq2	LRT	glmGamPoi	scranSumFactors
Pet100	7dpi	-0.682762		372.675	4.36814e-06	0.000384597	-4.59305	-3.55043	55.2924	pseudobulk	DESeq2	LRT	glmGamPoi	scranSumFactors
Rnase1	7dpi	-3.02118		19.8774	4.42255e-06	0.000387771	-4.59047	-3.54827	55.1666	pseudobulk	DESeq2	LRT	glmGamPoi	scranSumFactors
Grik2	7dpi	0.439401		22090.3	4.44273e-06	0.000387931	4.58952	3.54816	55.1203	pseudobulk	DESeq2	LRT	glmGamPoi	scranSumFactors
ENSMUSG00000079444	7dpi	-0.694385		441.563	4.50941e-06	0.000390568	-4.58641	-3.54638	54.9693	pseudobulk	DESeq2	LRT	glmGamPoi	scranSumFactors
Sec61g	7dpi	-0.827787		224.228	4.50989e-06	0.000390568	-4.58638	-3.54638	54.9682	pseudobulk	DESeq2	LRT	glmGamPoi	scranSumFactors
Tspoap1	7dpi	0.494859		1506.89	4.57172e-06	0.000394306	4.58354	3.54387	54.8304	pseudobulk	DESeq2	LRT	glmGamPoi	scranSumFactors
Gm53055	7dpi	-0.95799		95.0474	4.63067e-06	0.000397374	-4.58086	-3.54182	54.701	pseudobulk	DESeq2	LRT	glmGamPoi	scranSumFactors
Lysmd4	7dpi	-0.604282		682.091	4.65133e-06	0.000397374	-4.57993	-3.54182	54.6561	pseudobulk	DESeq2	LRT	glmGamPoi	scranSumFactors
ENSMUSG00000094962	7dpi	-0.700346		231.46	4.66371e-06	0.000397374	-4.57937	-3.54182	54.6294	pseudobulk	DESeq2	LRT	glmGamPoi	scranSumFactors
Rhoa	7dpi	-0.5384		1004.92	4.78918e-06	0.000406426	-4.57382	-3.53588	54.3624	pseudobulk	DESeq2	LRT	glmGamPoi	scranSumFactors
Serf1	7dpi	-0.814297		106.264	4.81823e-06	0.000407256	-4.57255	-3.53534	54.3017	pseudobulk	DESeq2	LRT	glmGamPoi	scranSumFactors
ENSMUSG00000099478	7dpi	-0.846421		343.643	4.87086e-06	0.000410064	-4.57027	-3.53352	54.1928	pseudobulk	DESeq2	LRT	glmGamPoi	scranSumFactors
Vkorc1	7dpi	-0.946875		179.928	4.91797e-06	0.000411146	-4.56826	-3.53282	54.0965	pseudobulk	DESeq2	LRT	glmGamPoi	scranSumFactors
Pigyl	7dpi	-0.644459		328.792	4.92262e-06	0.000411146	-4.56806	-3.53282	54.0871	pseudobulk	DESeq2	LRT	glmGamPoi	scranSumFactors
H3f3a	7dpi	-0.578187		1172.63	5.04764e-06	0.000419928	-4.5628	-3.52723	53.8369	pseudobulk	DESeq2	LRT	glmGamPoi	scranSumFactors
Tomm6	7dpi	-0.8597		762.831	5.07977e-06	0.000420944	-4.56147	-3.52659	53.7737	pseudobulk	DESeq2	LRT	glmGamPoi	scranSumFactors
Snrpd2	7dpi	-0.804637		573.304	5.14055e-06	0.000422711	-4.55897	-3.52548	53.6555	pseudobulk	DESeq2	LRT	glmGamPoi	scranSumFactors
Atp5d	7dpi	-0.642243		1363.54	5.1663e-06	0.000422711	-4.55792	-3.52548	53.6059	pseudobulk	DESeq2	LRT	glmGamPoi	scranSumFactors
Ier5l	7dpi	-0.894813		142.919	5.19407e-06	0.000422711	-4.55679	-3.52548	53.5528	pseudobulk	DESeq2	LRT	glmGamPoi	scranSumFactors
ENSMUSG00000099407	7dpi	-1.09197		77.2201	5.19716e-06	0.000422711	-4.55667	-3.52548	53.5468	pseudobulk	DESeq2	LRT	glmGamPoi	scranSumFactors
Mgst1	7dpi	-0.945335		186.043	5.20112e-06	0.000422711	-4.55651	-3.52548	53.5393	pseudobulk	DESeq2	LRT	glmGamPoi	scranSumFactors
Skp1	7dpi	-0.6804		842.915	5.36323e-06	0.000434217	-4.55005	-3.51836	53.2358	pseudobulk	DESeq2	LRT	glmGamPoi	scranSumFactors
Flnb	7dpi	0.371852		1804.48	5.42038e-06	0.00043637	4.54782	3.51705	53.1313	pseudobulk	DESeq2	LRT	glmGamPoi	scranSumFactors
4930598N05Rik	7dpi	0.745189		405.262	5.43113e-06	0.00043637	4.54741	3.51705	53.1117	pseudobulk	DESeq2	LRT	glmGamPoi	scranSumFactors
Psmb3	7dpi	-0.714298		806.414	5.45827e-06	0.000436889	-4.54636	-3.51674	53.0627	pseudobulk	DESeq2	LRT	glmGamPoi	scranSumFactors
Ppp1r11	7dpi	-0.814816		578.641	5.48743e-06	0.000437565	-4.54523	-3.51632	53.0103	pseudobulk	DESeq2	LRT	glmGamPoi	scranSumFactors
Tardbp	7dpi	0.386296		1091.25	5.53162e-06	0.000439431	4.54354	3.5152	52.9315	pseudobulk	DESeq2	LRT	glmGamPoi	scranSumFactors
Ddx3y	7dpi	-0.883951		84.7763	5.62017e-06	0.000444793	-4.5402	-3.51197	52.7757	pseudobulk	DESeq2	LRT	glmGamPoi	scranSumFactors
Mrpl35	7dpi	-0.759955		187.268	5.6879e-06	0.000448474	-4.53767	-3.50978	52.6584	pseudobulk	DESeq2	LRT	glmGamPoi	scranSumFactors
Nrg3os	7dpi	-0.784107		2178.99	5.80553e-06	0.000454384	-4.53335	-3.5063	52.4586	pseudobulk	DESeq2	LRT	glmGamPoi	scranSumFactors
H2az1	7dpi	-0.646888		1613.33	5.82369e-06	0.000454384	-4.53269	-3.5063	52.4281	pseudobulk	DESeq2	LRT	glmGamPoi	scranSumFactors
Fxyd1	7dpi	-0.992329		297.444	5.82736e-06	0.000454384	-4.53256	-3.5063	52.422	pseudobulk	DESeq2	LRT	glmGamPoi	scranSumFactors
Tmbim4	7dpi	-0.620038		816.718	5.89845e-06	0.000457139	-4.53	-3.50469	52.3039	pseudobulk	DESeq2	LRT	glmGamPoi	scranSumFactors
Timm8b	7dpi	-0.678895		701.624	5.90596e-06	0.000457139	-4.52973	-3.50469	52.2916	pseudobulk	DESeq2	LRT	glmGamPoi	scranSumFactors
Gpx1	7dpi	-0.79325		257.215	5.9676e-06	0.000458604	-4.52753	-3.50384	52.1907	pseudobulk	DESeq2	LRT	glmGamPoi	scranSumFactors
ENSMUSG00000109083	7dpi	-1.7048		21.9834	5.9683e-06	0.000458604	-4.52751	-3.50384	52.1895	pseudobulk	DESeq2	LRT	glmGamPoi	scranSumFactors
Gm11149	7dpi	-0.513838		570.407	6.06569e-06	0.00046295	-4.52409	-3.50133	52.0326	pseudobulk	DESeq2	LRT	glmGamPoi	scranSumFactors
ENSMUSG00000115289	7dpi	-0.721723		603.124	6.06868e-06	0.00046295	-4.52398	-3.50133	52.0278	pseudobulk	DESeq2	LRT	glmGamPoi	scranSumFactors
Mrps14	7dpi	-0.60699		597.887	6.11217e-06	0.000464591	-4.52247	-3.50038	51.9587	pseudobulk	DESeq2	LRT	glmGamPoi	scranSumFactors
Gm9645	7dpi	-0.736356		167.283	6.27352e-06	0.000473915	-4.51696	-3.49508	51.7072	pseudobulk	DESeq2	LRT	glmGamPoi	scranSumFactors
Aip	7dpi	-0.701261		276.251	6.27969e-06	0.000473915	-4.51675	-3.49508	51.6977	pseudobulk	DESeq2	LRT	glmGamPoi	scranSumFactors
C530005A16Rik	7dpi	-0.692884		148.589	6.31316e-06	0.000474435	-4.51562	-3.49479	51.6465	pseudobulk	DESeq2	LRT	glmGamPoi	scranSumFactors
Gng13	7dpi	-0.672294		227.445	6.33149e-06	0.000474435	-4.51501	-3.49479	51.6186	pseudobulk	DESeq2	LRT	glmGamPoi	scranSumFactors
Gm15614	7dpi	-0.525383		477.402	6.37138e-06	0.000475737	-4.51368	-3.49406	51.5582	pseudobulk	DESeq2	LRT	glmGamPoi	scranSumFactors
Tmem256	7dpi	-0.489233		523.287	6.51939e-06	0.000483355	-4.5088	-3.48981	51.3378	pseudobulk	DESeq2	LRT	glmGamPoi	scranSumFactors
Rnf7	7dpi	-0.57558		692.02	6.53344e-06	0.000483355	-4.50835	-3.48981	51.3172	pseudobulk	DESeq2	LRT	glmGamPoi	scranSumFactors
Arfip1.1	7dpi	-0.587722		2281.32	6.54203e-06	0.000483355	-4.50807	-3.48981	51.3046	pseudobulk	DESeq2	LRT	glmGamPoi	scranSumFactors
Rtraf	7dpi	-0.636747		571.574	6.56722e-06	0.000483526	-4.50725	-3.48972	51.2678	pseudobulk	DESeq2	LRT	glmGamPoi	scranSumFactors
Ywhaq	7dpi	-0.474068		2064.05	6.64417e-06	0.000485765	-4.50478	-3.48849	51.1564	pseudobulk	DESeq2	LRT	glmGamPoi	scranSumFactors
ENSMUSG00000111368	7dpi	-0.747467		373.541	6.65668e-06	0.000485765	-4.50438	-3.48849	51.1385	pseudobulk	DESeq2	LRT	glmGamPoi	scranSumFactors
Chmp2a	7dpi	-0.69497		629.547	6.66659e-06	0.000485765	-4.50406	-3.48849	51.1243	pseudobulk	DESeq2	LRT	glmGamPoi	scranSumFactors
Ramac	7dpi	-0.714906		431.455	6.74094e-06	0.000489494	-4.50171	-3.48644	51.0185	pseudobulk	DESeq2	LRT	glmGamPoi	scranSumFactors
Sdhb	7dpi	-0.577912		1159.27	6.8308e-06	0.000493999	-4.49889	-3.48399	50.8924	pseudobulk	DESeq2	LRT	glmGamPoi	scranSumFactors
Leng9	7dpi	-0.578238		260.553	6.87282e-06	0.000493999	-4.49759	-3.48399	50.8341	pseudobulk	DESeq2	LRT	glmGamPoi	scranSumFactors
Nell1os	7dpi	-0.816279		282.515	6.87311e-06	0.000493999	-4.49758	-3.48399	50.8337	pseudobulk	DESeq2	LRT	glmGamPoi	scranSumFactors
Chmp5	7dpi	-0.670314		509.949	6.90566e-06	0.000494656	-4.49658	-3.48363	50.7888	pseudobulk	DESeq2	LRT	glmGamPoi	scranSumFactors
Hmgb1	7dpi	-0.475149		2060.03	6.93266e-06	0.000494912	-4.49575	-3.4835	50.7517	pseudobulk	DESeq2	LRT	glmGamPoi	scranSumFactors
Rsf1os1	7dpi	-0.700522		288.247	7.00925e-06	0.000498695	-4.49341	-3.48146	50.6475	pseudobulk	DESeq2	LRT	glmGamPoi	scranSumFactors
Map1lc3a	7dpi	-0.737558		1180.07	7.14904e-06	0.000505245	-4.4892	-3.47796	50.4607	pseudobulk	DESeq2	LRT	glmGamPoi	scranSumFactors
Swi5	7dpi	-0.519838		888.943	7.14913e-06	0.000505245	-4.4892	-3.47796	50.4606	pseudobulk	DESeq2	LRT	glmGamPoi	scranSumFactors
ENSMUSG00000086942	7dpi	-0.602635		563.619	7.2774e-06	0.000508487	-4.48541	-3.47625	50.2928	pseudobulk	DESeq2	LRT	glmGamPoi	scranSumFactors
Tomm22	7dpi	-0.623346		553.871	7.28003e-06	0.000508487	-4.48533	-3.47625	50.2894	pseudobulk	DESeq2	LRT	glmGamPoi	scranSumFactors
Rnaset2b	7dpi	-0.818302		233.733	7.29351e-06	0.000508487	-4.48494	-3.47625	50.272	pseudobulk	DESeq2	LRT	glmGamPoi	scranSumFactors
S100a1	7dpi	-0.812879		254.682	7.31159e-06	0.000508487	-4.48441	-3.47625	50.2487	pseudobulk	DESeq2	LRT	glmGamPoi	scranSumFactors
Mrpl23-ps1	7dpi	-0.784101		143.391	7.31532e-06	0.000508487	-4.4843	-3.47625	50.2439	pseudobulk	DESeq2	LRT	glmGamPoi	scranSumFactors
Selplg	7dpi	-1.10514		72.7617	7.37636e-06	0.000511049	-4.48253	-3.4749	50.1657	pseudobulk	DESeq2	LRT	glmGamPoi	scranSumFactors
C1qa	7dpi	-1.37989		99.6402	7.45212e-06	0.000513332	-4.48035	-3.4737	50.0697	pseudobulk	DESeq2	LRT	glmGamPoi	scranSumFactors
ENSMUSG00000110803	7dpi	-0.655963		1023.55	7.4579e-06	0.000513332	-4.48018	-3.4737	50.0624	pseudobulk	DESeq2	LRT	glmGamPoi	scranSumFactors
Ss18l2	7dpi	-0.680903		344.301	7.49164e-06	0.00051398	-4.47922	-3.47336	50.0201	pseudobulk	DESeq2	LRT	glmGamPoi	scranSumFactors
Snrpf	7dpi	-0.607281		494.38	7.60692e-06	0.000518955	-4.47596	-3.47078	49.877	pseudobulk	DESeq2	LRT	glmGamPoi	scranSumFactors
ENSMUSG00000110202	7dpi	-0.934423		133.831	7.61328e-06	0.000518955	-4.47578	-3.47078	49.8692	pseudobulk	DESeq2	LRT	glmGamPoi	scranSumFactors
ENSMUSG00000106218	7dpi	-0.605859		925.692	7.69416e-06	0.000519808	-4.47352	-3.47034	49.7703	pseudobulk	DESeq2	LRT	glmGamPoi	scranSumFactors
Zmat2	7dpi	-0.609827		709.513	7.69906e-06	0.000519808	-4.47339	-3.47034	49.7644	pseudobulk	DESeq2	LRT	glmGamPoi	scranSumFactors
Ctsz	7dpi	-0.704643		201.845	7.70842e-06	0.000519808	-4.47313	-3.47034	49.7531	pseudobulk	DESeq2	LRT	glmGamPoi	scranSumFactors
ENSMUSG00000103393	7dpi	-0.508108		548.269	7.72418e-06	0.000519808	-4.47269	-3.47034	49.734	pseudobulk	DESeq2	LRT	glmGamPoi	scranSumFactors
ENSMUSG00000108943	7dpi	0.512783		532.156	7.75537e-06	0.00052025	4.47183	3.47011	49.6964	pseudobulk	DESeq2	LRT	glmGamPoi	scranSumFactors
Mrpl42	7dpi	-0.580466		557.481	7.79633e-06	0.000521342	-4.4707	-3.46954	49.6472	pseudobulk	DESeq2	LRT	glmGamPoi	scranSumFactors
Mrpl20	7dpi	-0.75039		602.105	7.98001e-06	0.00053068	-4.46572	-3.46477	49.4305	pseudobulk	DESeq2	LRT	glmGamPoi	scranSumFactors
Higd2a	7dpi	-0.658627		760.829	7.98619e-06	0.00053068	-4.46555	-3.46477	49.4233	pseudobulk	DESeq2	LRT	glmGamPoi	scranSumFactors
Edf1	7dpi	-0.652213		1119.73	8.10617e-06	0.000535971	-4.46236	-3.4621	49.2849	pseudobulk	DESeq2	LRT	glmGamPoi	scranSumFactors
Btf3	7dpi	-0.894279		688.37	8.11655e-06	0.000535971	-4.46209	-3.4621	49.2731	pseudobulk	DESeq2	LRT	glmGamPoi	scranSumFactors
Lsm4	7dpi	-0.624212		316.149	8.15496e-06	0.00053683	-4.46107	-3.46167	49.2293	pseudobulk	DESeq2	LRT	glmGamPoi	scranSumFactors
ENSMUSG00000111414	7dpi	-0.908299		146.879	8.21821e-06	0.000539242	-4.45942	-3.46047	49.1578	pseudobulk	DESeq2	LRT	glmGamPoi	scranSumFactors
Ndufb5	7dpi	-0.677338		1424.06	8.24263e-06	0.000539242	-4.45878	-3.46047	49.1304	pseudobulk	DESeq2	LRT	glmGamPoi	scranSumFactors
Rpl39	7dpi	-0.760215		1255.79	8.27971e-06	0.000539995	-4.45782	-3.46009	49.0889	pseudobulk	DESeq2	LRT	glmGamPoi	scranSumFactors
ENSMUSG00000114988	7dpi	-0.893212		77.6598	8.33392e-06	0.00054043	-4.45642	-3.45987	49.0286	pseudobulk	DESeq2	LRT	glmGamPoi	scranSumFactors
Timm13	7dpi	-0.474174		630.897	8.33828e-06	0.00054043	-4.45631	-3.45987	49.0238	pseudobulk	DESeq2	LRT	glmGamPoi	scranSumFactors
Polr2j	7dpi	-0.530319		379.196	8.3631e-06	0.00054043	-4.45567	-3.45987	48.9964	pseudobulk	DESeq2	LRT	glmGamPoi	scranSumFactors
Hmgn2	7dpi	-0.546923		521.375	8.39548e-06	0.000540869	-4.45484	-3.45965	48.9607	pseudobulk	DESeq2	LRT	glmGamPoi	scranSumFactors
ENSMUSG00000108489	7dpi	-1.19495		84.8996	8.4818e-06	0.00054332	-4.45265	-3.45844	48.8665	pseudobulk	DESeq2	LRT	glmGamPoi	scranSumFactors
Smim26	7dpi	-0.745338		506.789	8.48495e-06	0.00054332	-4.45257	-3.45844	48.8631	pseudobulk	DESeq2	LRT	glmGamPoi	scranSumFactors
ENSMUSG00000107962	7dpi	-1.22636		50.5005	8.55393e-06	0.000546082	-4.45083	-3.45707	48.7886	pseudobulk	DESeq2	LRT	glmGamPoi	scranSumFactors
Hcfc1r1	7dpi	-0.800926		793.378	8.61479e-06	0.000548311	-4.44931	-3.45597	48.7234	pseudobulk	DESeq2	LRT	glmGamPoi	scranSumFactors
Rab9	7dpi	-0.532951		334.904	8.70149e-06	0.000551597	-4.44716	-3.45436	48.6315	pseudobulk	DESeq2	LRT	glmGamPoi	scranSumFactors
Mien1	7dpi	-0.804017		356.904	8.71863e-06	0.000551597	-4.44673	-3.45436	48.6135	pseudobulk	DESeq2	LRT	glmGamPoi	scranSumFactors
Hspb1	7dpi	-1.81643		31.6372	8.80996e-06	0.000555711	-4.44449	-3.45236	48.518	pseudobulk	DESeq2	LRT	glmGamPoi	scranSumFactors
Idi1	7dpi	-0.676679		283.531	8.85695e-06	0.000557012	-4.44335	-3.45173	48.4694	pseudobulk	DESeq2	LRT	glmGamPoi	scranSumFactors
ENSMUSG00000115333	7dpi	-1.13618		44.9714	9.02187e-06	0.000565701	-4.43938	-3.44755	48.3009	pseudobulk	DESeq2	LRT	glmGamPoi	scranSumFactors
Cops6	7dpi	-0.780903		441.687	9.09715e-06	0.000568733	-4.43759	-3.4461	48.2251	pseudobulk	DESeq2	LRT	glmGamPoi	scranSumFactors
ENSMUSG00000109781	7dpi	-0.899136		75.3657	9.19515e-06	0.000573164	-4.43528	-3.44401	48.1276	pseudobulk	DESeq2	LRT	glmGamPoi	scranSumFactors
Atp5pb	7dpi	-0.674155		1759.88	9.29349e-06	0.00057624	-4.43299	-3.44256	48.0309	pseudobulk	DESeq2	LRT	glmGamPoi	scranSumFactors
Scand1	7dpi	-0.646443		655.674	9.29903e-06	0.00057624	-4.43286	-3.44256	48.0255	pseudobulk	DESeq2	LRT	glmGamPoi	scranSumFactors
Mrpl55	7dpi	-0.726763		335.995	9.51308e-06	0.000587781	-4.42795	-3.43719	47.8193	pseudobulk	DESeq2	LRT	glmGamPoi	scranSumFactors
ENSMUSG00000110576	7dpi	-1.56823		28.6216	9.54547e-06	0.000588062	-4.42722	-3.43706	47.7885	pseudobulk	DESeq2	LRT	glmGamPoi	scranSumFactors
Dctn3	7dpi	-0.762615		658.335	9.63351e-06	0.000591168	-4.42524	-3.43563	47.7056	pseudobulk	DESeq2	LRT	glmGamPoi	scranSumFactors
ENSMUSG00000081670	7dpi	-0.813028		154.181	9.65801e-06	0.000591168	-4.42469	-3.43563	47.6826	pseudobulk	DESeq2	LRT	glmGamPoi	scranSumFactors
Amy1	7dpi	0.426598		1683.97	9.69725e-06	0.000591168	4.42382	3.43563	47.646	pseudobulk	DESeq2	LRT	glmGamPoi	scranSumFactors
Mpc2	7dpi	-0.570934		1099.15	9.70779e-06	0.000591168	-4.42358	-3.43563	47.6362	pseudobulk	DESeq2	LRT	glmGamPoi	scranSumFactors
Clta	7dpi	-0.570418		1530.37	9.79291e-06	0.000593211	-4.4217	-3.4347	47.5575	pseudobulk	DESeq2	LRT	glmGamPoi	scranSumFactors
C1qc	7dpi	-1.5248		71.856	9.80683e-06	0.000593211	-4.42139	-3.4347	47.5448	pseudobulk	DESeq2	LRT	glmGamPoi	scranSumFactors
Rab5if	7dpi	-0.615126		512.158	9.82555e-06	0.000593211	-4.42098	-3.4347	47.5276	pseudobulk	DESeq2	LRT	glmGamPoi	scranSumFactors
ENSMUSG00000109157	7dpi	-0.654316		429.8	9.86084e-06	0.000593645	-4.4202	-3.4345	47.4953	pseudobulk	DESeq2	LRT	glmGamPoi	scranSumFactors
Mrpl12	7dpi	-0.658122		375.957	1.00665e-05	0.000603288	-4.41574	-3.43013	47.3099	pseudobulk	DESeq2	LRT	glmGamPoi	scranSumFactors
Ovgp1	7dpi	1.06487		128.732	1.00781e-05	0.000603288	4.41549	3.43013	47.2995	pseudobulk	DESeq2	LRT	glmGamPoi	scranSumFactors
Clcn1	7dpi	0.740268		117.19	1.0169e-05	0.000606465	4.41355	3.42871	47.2191	pseudobulk	DESeq2	LRT	glmGamPoi	scranSumFactors
Ifngr2	7dpi	-0.66198		281.105	1.01886e-05	0.000606465	-4.41313	-3.42871	47.2018	pseudobulk	DESeq2	LRT	glmGamPoi	scranSumFactors
Rpl28	7dpi	-0.777655		1189.41	1.02235e-05	0.000606832	-4.41239	-3.42854	47.1712	pseudobulk	DESeq2	LRT	glmGamPoi	scranSumFactors
ENSMUSG00000101559	7dpi	-1.30373		32.0824	1.04667e-05	0.000618372	-4.4073	-3.42343	46.9612	pseudobulk	DESeq2	LRT	glmGamPoi	scranSumFactors
Srp14	7dpi	-0.601805		1077.27	1.04764e-05	0.000618372	-4.4071	-3.42343	46.9529	pseudobulk	DESeq2	LRT	glmGamPoi	scranSumFactors
Snu13	7dpi	-0.833626		870.33	1.05999e-05	0.000623917	-4.40456	-3.421	46.8485	pseudobulk	DESeq2	LRT	glmGamPoi	scranSumFactors
ENSMUSG00000105255	7dpi	-0.970722		323.326	1.07348e-05	0.000630101	-4.40182	-3.41832	46.7361	pseudobulk	DESeq2	LRT	glmGamPoi	scranSumFactors
Cwc15	7dpi	-0.554563		512.125	1.09882e-05	0.000643189	-4.39675	-3.41272	46.5292	pseudobulk	DESeq2	LRT	glmGamPoi	scranSumFactors
ENSMUSG00000097451	7dpi	0.319642		10873.4	1.10372e-05	0.000643781	4.39579	3.41247	46.4898	pseudobulk	DESeq2	LRT	glmGamPoi	scranSumFactors
Sfr1	7dpi	-0.726875		634.165	1.10592e-05	0.000643781	-4.39535	-3.41247	46.4722	pseudobulk	DESeq2	LRT	glmGamPoi	scranSumFactors
Tuba1a	7dpi	-0.797183		1776.74	1.11327e-05	0.000646275	-4.39392	-3.41141	46.4137	pseudobulk	DESeq2	LRT	glmGamPoi	scranSumFactors
Pigf	7dpi	-0.53501		265.148	1.11716e-05	0.000646762	-4.39316	-3.41121	46.3828	pseudobulk	DESeq2	LRT	glmGamPoi	scranSumFactors
Mllt11	7dpi	-0.593537		1174.82	1.1224e-05	0.000648019	-4.39214	-3.41068	46.3415	pseudobulk	DESeq2	LRT	glmGamPoi	scranSumFactors
Hspe1	7dpi	-0.866407		931.486	1.12835e-05	0.00064968	-4.39099	-3.40998	46.2948	pseudobulk	DESeq2	LRT	glmGamPoi	scranSumFactors
ENSMUSG00000044285	7dpi	-0.835447		1562.71	1.13165e-05	0.000649806	-4.39036	-3.40993	46.2691	pseudobulk	DESeq2	LRT	glmGamPoi	scranSumFactors
Ndufb9	7dpi	-0.651459		1325.67	1.14344e-05	0.000654799	-4.3881	-3.40784	46.1778	pseudobulk	DESeq2	LRT	glmGamPoi	scranSumFactors
Atp5c1	7dpi	-0.476303		1631.09	1.14994e-05	0.000656739	-4.38687	-3.40703	46.128	pseudobulk	DESeq2	LRT	glmGamPoi	scranSumFactors
Ubc	7dpi	-0.655777		2009.82	1.15733e-05	0.000657623	-4.38547	-3.40666	46.0717	pseudobulk	DESeq2	LRT	glmGamPoi	scranSumFactors
Dcx	7dpi	0.411179		956.718	1.15771e-05	0.000657623	4.3854	3.40666	46.0688	pseudobulk	DESeq2	LRT	glmGamPoi	scranSumFactors
ENSMUSG00000081604	7dpi	-0.629523		390.534	1.16469e-05	0.000659817	-4.38409	-3.40575	46.016	pseudobulk	DESeq2	LRT	glmGamPoi	scranSumFactors
ENSMUSG00000106375	7dpi	-0.958086		86.2823	1.17708e-05	0.000665048	-4.38179	-3.4036	45.9233	pseudobulk	DESeq2	LRT	glmGamPoi	scranSumFactors
Gm12709	7dpi	-0.787442		342.712	1.18223e-05	0.000666178	-4.38084	-3.40313	45.8851	pseudobulk	DESeq2	LRT	glmGamPoi	scranSumFactors
Ccr9	7dpi	-0.694941		227.794	1.19217e-05	0.000667417	-4.37901	-3.40263	45.8118	pseudobulk	DESeq2	LRT	glmGamPoi	scranSumFactors
Ndufv3	7dpi	-0.554269		895.58	1.20004e-05	0.000667417	-4.37758	-3.40263	45.7543	pseudobulk	DESeq2	LRT	glmGamPoi	scranSumFactors
Rps27l	7dpi	-0.687569		189.916	1.2003e-05	0.000667417	-4.37753	-3.40263	45.7524	pseudobulk	DESeq2	LRT	glmGamPoi	scranSumFactors
Slirp	7dpi	-0.902816		394.775	1.20273e-05	0.000667417	-4.37709	-3.40263	45.7347	pseudobulk	DESeq2	LRT	glmGamPoi	scranSumFactors
Cx3cr1	7dpi	-0.538043		316.071	1.20341e-05	0.000667417	-4.37697	-3.40263	45.7298	pseudobulk	DESeq2	LRT	glmGamPoi	scranSumFactors
H1f0	7dpi	-0.720578		198.359	1.20442e-05	0.000667417	-4.37679	-3.40263	45.7225	pseudobulk	DESeq2	LRT	glmGamPoi	scranSumFactors
Smim15	7dpi	-0.787134		134.821	1.20654e-05	0.000667417	-4.3764	-3.40263	45.7072	pseudobulk	DESeq2	LRT	glmGamPoi	scranSumFactors
Cisd1	7dpi	-0.701719		1067.73	1.21685e-05	0.000671365	-4.37455	-3.40101	45.6329	pseudobulk	DESeq2	LRT	glmGamPoi	scranSumFactors
Pla2g12a	7dpi	-0.553723		251.145	1.2381e-05	0.000681312	-4.37077	-3.39699	45.4822	pseudobulk	DESeq2	LRT	glmGamPoi	scranSumFactors
Rps10	7dpi	-0.746711		1675.8	1.26356e-05	0.000691736	-4.36632	-3.39283	45.3055	pseudobulk	DESeq2	LRT	glmGamPoi	scranSumFactors
Eif1	7dpi	-0.729605		2925.68	1.26359e-05	0.000691736	-4.36632	-3.39283	45.3053	pseudobulk	DESeq2	LRT	glmGamPoi	scranSumFactors
Rpl30	7dpi	-0.755723		1196.02	1.28019e-05	0.00069901	-4.36346	-3.38997	45.1923	pseudobulk	DESeq2	LRT	glmGamPoi	scranSumFactors
Arpc4	7dpi	-0.648632		382.83	1.28435e-05	0.000699473	-4.36276	-3.38979	45.1643	pseudobulk	DESeq2	LRT	glmGamPoi	scranSumFactors
Snrpd3	7dpi	-0.55384		467.059	1.32267e-05	0.000718491	-4.35632	-3.38242	44.9106	pseudobulk	DESeq2	LRT	glmGamPoi	scranSumFactors
Rps6	7dpi	-0.837428		552.33	1.33063e-05	0.000720964	-4.35501	-3.38148	44.859	pseudobulk	DESeq2	LRT	glmGamPoi	scranSumFactors
Eif1ax	7dpi	-0.453769		348.05	1.33626e-05	0.000722162	-4.35408	-3.38102	44.8227	pseudobulk	DESeq2	LRT	glmGamPoi	scranSumFactors
Nipsnap3b	7dpi	-0.74601		103.183	1.35152e-05	0.000728548	-4.35159	-3.3786	44.7252	pseudobulk	DESeq2	LRT	glmGamPoi	scranSumFactors
Tspyl1	7dpi	-0.736456		418.941	1.35501e-05	0.000728569	-4.35103	-3.3786	44.7031	pseudobulk	DESeq2	LRT	glmGamPoi	scranSumFactors
Gm1673	7dpi	-0.819135		1915.07	1.36957e-05	0.000734526	-4.34868	-3.37636	44.6115	pseudobulk	DESeq2	LRT	glmGamPoi	scranSumFactors
1810058I24Rik	7dpi	-0.624154		201.035	1.37318e-05	0.000734601	-4.34811	-3.37633	44.589	pseudobulk	DESeq2	LRT	glmGamPoi	scranSumFactors
9630028H03Rik	7dpi	-0.681992		378.664	1.38398e-05	0.000738132	-4.34639	-3.37501	44.5219	pseudobulk	DESeq2	LRT	glmGamPoi	scranSumFactors
Gm38505	7dpi	-1.31828		297.59	1.38677e-05	0.000738132	-4.34595	-3.37501	44.5047	pseudobulk	DESeq2	LRT	glmGamPoi	scranSumFactors
Gng11	7dpi	-1.35838		347.102	1.40844e-05	0.000747782	-4.34254	-3.37143	44.3724	pseudobulk	DESeq2	LRT	glmGamPoi	scranSumFactors
ENSMUSG00000117604	7dpi	0.485921		703.898	1.42327e-05	0.000753763	4.34024	3.36924	44.2832	pseudobulk	DESeq2	LRT	glmGamPoi	scranSumFactors
ENSMUSG00000099811	7dpi	-0.76807		94.7097	1.4327e-05	0.000756862	-4.33879	-3.36811	44.227	pseudobulk	DESeq2	LRT	glmGamPoi	scranSumFactors
Ube2e3	7dpi	-0.461943		952.24	1.44981e-05	0.000763175	-4.33618	-3.36582	44.1261	pseudobulk	DESeq2	LRT	glmGamPoi	scranSumFactors
Acot13	7dpi	-0.559509		500.2	1.45692e-05	0.000763175	-4.3351	-3.36582	44.0846	pseudobulk	DESeq2	LRT	glmGamPoi	scranSumFactors
Mrps25	7dpi	-0.534313		376.522	1.45755e-05	0.000763175	-4.33501	-3.36582	44.0809	pseudobulk	DESeq2	LRT	glmGamPoi	scranSumFactors
Cstb	7dpi	-0.7301		291.84	1.4591e-05	0.000763175	-4.33477	-3.36582	44.0719	pseudobulk	DESeq2	LRT	glmGamPoi	scranSumFactors
Nol7	7dpi	-0.524193		522.201	1.47128e-05	0.000767644	-4.33295	-3.36421	44.0015	pseudobulk	DESeq2	LRT	glmGamPoi	scranSumFactors
Ptms	7dpi	-0.527453		1300.33	1.48069e-05	0.000770653	-4.33154	-3.36313	43.9475	pseudobulk	DESeq2	LRT	glmGamPoi	scranSumFactors
Gm10635	7dpi	-1.2861		39.3202	1.48586e-05	0.00077112	-4.33077	-3.36296	43.918	pseudobulk	DESeq2	LRT	glmGamPoi	scranSumFactors
0610009B22Rik	7dpi	-0.767623		300.711	1.48893e-05	0.00077112	-4.33032	-3.36296	43.9006	pseudobulk	DESeq2	LRT	glmGamPoi	scranSumFactors
ENSMUSG00000086364	7dpi	-0.779146		123.157	1.49254e-05	0.00077112	-4.32979	-3.36296	43.8801	pseudobulk	DESeq2	LRT	glmGamPoi	scranSumFactors
ENSMUSG00000082519	7dpi	-1.27929		45.3722	1.50479e-05	0.00077435	-4.32799	-3.3618	43.811	pseudobulk	DESeq2	LRT	glmGamPoi	scranSumFactors
Eloc	7dpi	-0.511844		579.814	1.50612e-05	0.00077435	-4.32779	-3.3618	43.8036	pseudobulk	DESeq2	LRT	glmGamPoi	scranSumFactors
Bola2	7dpi	-0.691567		314.502	1.51411e-05	0.00077657	-4.32663	-3.36101	43.7589	pseudobulk	DESeq2	LRT	glmGamPoi	scranSumFactors
Ndufa8	7dpi	-0.742932		792.197	1.52503e-05	0.000776913	-4.32504	-3.36089	43.6984	pseudobulk	DESeq2	LRT	glmGamPoi	scranSumFactors
Mrpl54	7dpi	-0.586808		340.268	1.52538e-05	0.000776913	-4.32499	-3.36089	43.6964	pseudobulk	DESeq2	LRT	glmGamPoi	scranSumFactors
ENSMUSG00000090117	7dpi	-0.86872		248.95	1.52581e-05	0.000776913	-4.32493	-3.36089	43.6941	pseudobulk	DESeq2	LRT	glmGamPoi	scranSumFactors
Ndufaf2	7dpi	-0.430225		837.445	1.54121e-05	0.00078287	-4.32271	-3.35878	43.6095	pseudobulk	DESeq2	LRT	glmGamPoi	scranSumFactors
Lamtor5	7dpi	-0.607366		340.586	1.54656e-05	0.0007837	-4.32195	-3.35849	43.5804	pseudobulk	DESeq2	LRT	glmGamPoi	scranSumFactors
Rpl10-ps3	7dpi	-1.07776		271.133	1.55068e-05	0.000783912	-4.32136	-3.35841	43.558	pseudobulk	DESeq2	LRT	glmGamPoi	scranSumFactors
Myl12b	7dpi	-0.755945		1136.6	1.56123e-05	0.00078736	-4.31987	-3.3572	43.5011	pseudobulk	DESeq2	LRT	glmGamPoi	scranSumFactors
Fundc2	7dpi	-0.655258		244.102	1.57815e-05	0.000788695	-4.31749	-3.35673	43.4107	pseudobulk	DESeq2	LRT	glmGamPoi	scranSumFactors
Sub1	7dpi	-0.725688		943.661	1.57847e-05	0.000788695	-4.31744	-3.35673	43.409	pseudobulk	DESeq2	LRT	glmGamPoi	scranSumFactors
Acp1	7dpi	-0.580115		1510.09	1.57852e-05	0.000788695	-4.31744	-3.35673	43.4087	pseudobulk	DESeq2	LRT	glmGamPoi	scranSumFactors
Mtln	7dpi	-0.697392		367.823	1.58181e-05	0.000788695	-4.31698	-3.35673	43.3913	pseudobulk	DESeq2	LRT	glmGamPoi	scranSumFactors
Psenen	7dpi	-0.718869		772.326	1.58254e-05	0.000788695	-4.31687	-3.35673	43.3874	pseudobulk	DESeq2	LRT	glmGamPoi	scranSumFactors
Ftx	7dpi	0.314421		3455.16	1.58707e-05	0.000789091	4.31624	3.35659	43.3635	pseudobulk	DESeq2	LRT	glmGamPoi	scranSumFactors
Rgs10	7dpi	-0.670838		359.134	1.59416e-05	0.000790757	-4.31526	-3.35601	43.3262	pseudobulk	DESeq2	LRT	glmGamPoi	scranSumFactors
Ppa1	7dpi	-0.610992		619.004	1.61557e-05	0.0007995	-4.31231	-3.35297	43.2147	pseudobulk	DESeq2	LRT	glmGamPoi	scranSumFactors
ENSMUSG00000087556	7dpi	-0.581818		213.995	1.65096e-05	0.000813003	-4.30752	-3.34833	43.034	pseudobulk	DESeq2	LRT	glmGamPoi	scranSumFactors
Gm11808	7dpi	-0.564192		667.921	1.65306e-05	0.000813003	-4.30724	-3.34833	43.0234	pseudobulk	DESeq2	LRT	glmGamPoi	scranSumFactors
Gm960	7dpi	0.512626		241.127	1.6544e-05	0.000813003	4.30706	3.34833	43.0167	pseudobulk	DESeq2	LRT	glmGamPoi	scranSumFactors
Lsm3	7dpi	-0.637489		227.651	1.66919e-05	0.000818369	-4.30509	-3.34651	42.9427	pseudobulk	DESeq2	LRT	glmGamPoi	scranSumFactors
Shisa5	7dpi	-0.734325		209.254	1.68669e-05	0.000825035	-4.30278	-3.34426	42.8561	pseudobulk	DESeq2	LRT	glmGamPoi	scranSumFactors
Banf1	7dpi	-0.741945		162.049	1.70558e-05	0.000832347	-4.30031	-3.34181	42.7638	pseudobulk	DESeq2	LRT	glmGamPoi	scranSumFactors
ENSMUSG00000095438	7dpi	-0.715554		119.596	1.71107e-05	0.000833102	-4.2996	-3.34156	42.7372	pseudobulk	DESeq2	LRT	glmGamPoi	scranSumFactors
ENSMUSG00000102349	7dpi	-0.585189		1030.08	1.74944e-05	0.000849432	-4.29468	-3.33616	42.5539	pseudobulk	DESeq2	LRT	glmGamPoi	scranSumFactors
Gm31763	7dpi	-0.570103		217.486	1.75265e-05	0.000849432	-4.29428	-3.33616	42.5388	pseudobulk	DESeq2	LRT	glmGamPoi	scranSumFactors
Ech1	7dpi	-0.503015		250.64	1.7586e-05	0.000850364	-4.29352	-3.33586	42.5108	pseudobulk	DESeq2	LRT	glmGamPoi	scranSumFactors
ENSMUSG00000113105	7dpi	-0.936561		106.556	1.7724e-05	0.000855082	-4.29179	-3.33432	42.4464	pseudobulk	DESeq2	LRT	glmGamPoi	scranSumFactors
Taldo1	7dpi	-0.606273		570.48	1.77909e-05	0.000856355	-4.29095	-3.33391	42.4154	pseudobulk	DESeq2	LRT	glmGamPoi	scranSumFactors
ENSMUSG00000113907	7dpi	-0.704772		287.176	1.78948e-05	0.000859399	-4.28966	-3.33292	42.3675	pseudobulk	DESeq2	LRT	glmGamPoi	scranSumFactors
ENSMUSG00000104647	7dpi	-0.851949		252.196	1.79377e-05	0.000859506	-4.28913	-3.33288	42.3478	pseudobulk	DESeq2	LRT	glmGamPoi	scranSumFactors
Anxa10	7dpi	-1.00689		50.4054	1.80791e-05	0.000864321	-4.28738	-3.33133	42.2833	pseudobulk	DESeq2	LRT	glmGamPoi	scranSumFactors
ENSMUSG00000045178	7dpi	-1.09702		88.872	1.81511e-05	0.000865804	-4.2865	-3.33085	42.2507	pseudobulk	DESeq2	LRT	glmGamPoi	scranSumFactors
Olfr1511	7dpi	-1.62888		44.9855	1.8233e-05	0.000866461	-4.2855	-3.33064	42.2138	pseudobulk	DESeq2	LRT	glmGamPoi	scranSumFactors
ENSMUSG00000070392	7dpi	-1.15756		46.1223	1.82655e-05	0.000866461	-4.2851	-3.33064	42.1992	pseudobulk	DESeq2	LRT	glmGamPoi	scranSumFactors
1700024B18Rik	7dpi	-0.74119		690.455	1.82879e-05	0.000866461	-4.28483	-3.33064	42.1892	pseudobulk	DESeq2	LRT	glmGamPoi	scranSumFactors
Fjx1	7dpi	-0.705741		281.86	1.83741e-05	0.000866766	-4.28378	-3.33054	42.1506	pseudobulk	DESeq2	LRT	glmGamPoi	scranSumFactors
Glmp	7dpi	-0.71246		197.288	1.84523e-05	0.000866766	-4.28284	-3.33054	42.1159	pseudobulk	DESeq2	LRT	glmGamPoi	scranSumFactors
4930587E11Rik	7dpi	-0.595784		200.034	1.84666e-05	0.000866766	-4.28267	-3.33054	42.1095	pseudobulk	DESeq2	LRT	glmGamPoi	scranSumFactors
Cfap77	7dpi	-0.910357		3350.03	1.84895e-05	0.000866766	-4.28239	-3.33054	42.0994	pseudobulk	DESeq2	LRT	glmGamPoi	scranSumFactors
Gtf2h5	7dpi	-0.452021		854.04	1.85266e-05	0.000866766	-4.28195	-3.33054	42.083	pseudobulk	DESeq2	LRT	glmGamPoi	scranSumFactors
Nme2	7dpi	-0.783427		529.361	1.85559e-05	0.000866766	-4.28159	-3.33054	42.0701	pseudobulk	DESeq2	LRT	glmGamPoi	scranSumFactors
Tceal8	7dpi	-0.706554		169.189	1.85815e-05	0.000866766	-4.28129	-3.33054	42.0588	pseudobulk	DESeq2	LRT	glmGamPoi	scranSumFactors
Xpo6	7dpi	0.37963		955.863	1.87637e-05	0.00086913	4.27912	3.32979	41.9791	pseudobulk	DESeq2	LRT	glmGamPoi	scranSumFactors
Spcs1	7dpi	-0.856519		1180.52	1.87643e-05	0.00086913	-4.27911	-3.32979	41.9788	pseudobulk	DESeq2	LRT	glmGamPoi	scranSumFactors
Qdpr	7dpi	-0.833471		887.076	1.87676e-05	0.00086913	-4.27907	-3.32979	41.9774	pseudobulk	DESeq2	LRT	glmGamPoi	scranSumFactors
Rps11	7dpi	-0.689765		1623.88	1.88086e-05	0.00086913	-4.27858	-3.32979	41.9595	pseudobulk	DESeq2	LRT	glmGamPoi	scranSumFactors
Sec24b	7dpi	0.306266		1693.38	1.88564e-05	0.00086913	4.27802	3.32979	41.9389	pseudobulk	DESeq2	LRT	glmGamPoi	scranSumFactors
Hint1	7dpi	-0.71388		2160.29	1.88789e-05	0.00086913	-4.27775	-3.32979	41.9291	pseudobulk	DESeq2	LRT	glmGamPoi	scranSumFactors
Adar	7dpi	0.325447		1392.99	1.91819e-05	0.000880185	4.27421	3.32626	41.7994	pseudobulk	DESeq2	LRT	glmGamPoi	scranSumFactors
Sap18b	7dpi	-0.78174		200.414	1.92024e-05	0.000880185	-4.27397	-3.32626	41.7907	pseudobulk	DESeq2	LRT	glmGamPoi	scranSumFactors
Nup210	7dpi	0.407929		437.774	1.93651e-05	0.000885723	4.27209	3.32452	41.7221	pseudobulk	DESeq2	LRT	glmGamPoi	scranSumFactors
Naca	7dpi	-0.704909		1527.83	1.96366e-05	0.000894554	-4.26898	-3.32175	41.6092	pseudobulk	DESeq2	LRT	glmGamPoi	scranSumFactors
Mzt1	7dpi	-0.422252		452.732	1.96428e-05	0.000894554	-4.26891	-3.32175	41.6066	pseudobulk	DESeq2	LRT	glmGamPoi	scranSumFactors
Lap3	7dpi	-0.713924		293.309	1.97261e-05	0.000896412	-4.26797	-3.32117	41.5723	pseudobulk	DESeq2	LRT	glmGamPoi	scranSumFactors
Npc2	7dpi	-0.556746		484.27	1.98769e-05	0.000901328	-4.26627	-3.31964	41.5106	pseudobulk	DESeq2	LRT	glmGamPoi	scranSumFactors
ENSMUSG00000116590	7dpi	-0.480523		681.407	1.99568e-05	0.000903013	-4.26537	-3.31912	41.4782	pseudobulk	DESeq2	LRT	glmGamPoi	scranSumFactors
ENSMUSG00000110209	7dpi	-1.05614		79.3546	2.00449e-05	0.000905062	-4.26439	-3.31849	41.4425	pseudobulk	DESeq2	LRT	glmGamPoi	scranSumFactors
Gm17597	7dpi	0.751132		91.4331	2.00932e-05	0.000905307	4.26385	3.31841	41.4231	pseudobulk	DESeq2	LRT	glmGamPoi	scranSumFactors
Ipw	7dpi	0.30553		13338.6	2.08158e-05	0.000935871	4.25596	3.30913	41.1384	pseudobulk	DESeq2	LRT	glmGamPoi	scranSumFactors
Ssu72	7dpi	-0.451271		893.269	2.09337e-05	0.000936974	-4.25469	-3.3088	41.093	pseudobulk	DESeq2	LRT	glmGamPoi	scranSumFactors
Ndufa6	7dpi	-0.599071		1442.83	2.09572e-05	0.000936974	-4.25444	-3.3088	41.084	pseudobulk	DESeq2	LRT	glmGamPoi	scranSumFactors
Vapa	7dpi	-0.426981		1633.39	2.09734e-05	0.000936974	-4.25427	-3.3088	41.0778	pseudobulk	DESeq2	LRT	glmGamPoi	scranSumFactors
Ramp1	7dpi	-0.643089		477.137	2.1083e-05	0.000939729	-4.2531	-3.30798	41.036	pseudobulk	DESeq2	LRT	glmGamPoi	scranSumFactors
Rps25	7dpi	-0.757769		1001.1	2.1124e-05	0.000939729	-4.25267	-3.30798	41.0204	pseudobulk	DESeq2	LRT	glmGamPoi	scranSumFactors
Snrnp27	7dpi	-0.60411		402.522	2.12505e-05	0.000943369	-4.25133	-3.30689	40.9726	pseudobulk	DESeq2	LRT	glmGamPoi	scranSumFactors
Psmb1	7dpi	-0.577289		1239.13	2.13796e-05	0.000947112	-4.24997	-3.30578	40.9241	pseudobulk	DESeq2	LRT	glmGamPoi	scranSumFactors
Pomp	7dpi	-0.771007		686.384	2.1428e-05	0.000947271	-4.24947	-3.30574	40.906	pseudobulk	DESeq2	LRT	glmGamPoi	scranSumFactors
Gsta4	7dpi	-0.63838		236.718	2.16515e-05	0.000954874	-4.24714	-3.3035	40.823	pseudobulk	DESeq2	LRT	glmGamPoi	scranSumFactors
Rpl18	7dpi	-0.662601		1290.46	2.16963e-05	0.000954874	-4.24668	-3.3035	40.8066	pseudobulk	DESeq2	LRT	glmGamPoi	scranSumFactors
P2ry14	7dpi	-0.669846		1509.2	2.17634e-05	0.000954874	-4.24599	-3.3035	40.7819	pseudobulk	DESeq2	LRT	glmGamPoi	scranSumFactors
ENSMUSG00000116823	7dpi	-0.989851		50.2974	2.17808e-05	0.000954874	-4.24581	-3.3035	40.7755	pseudobulk	DESeq2	LRT	glmGamPoi	scranSumFactors
ENSMUSG00000085822	7dpi	-0.673971		269.674	2.1905e-05	0.000958333	-4.24453	-3.30248	40.7301	pseudobulk	DESeq2	LRT	glmGamPoi	scranSumFactors
Shisa3	7dpi	-0.888412		327.008	2.20178e-05	0.000961278	-4.24338	-3.30162	40.6892	pseudobulk	DESeq2	LRT	glmGamPoi	scranSumFactors
Tmem14a	7dpi	-0.594543		242.793	2.21063e-05	0.000962039	-4.24248	-3.3014	40.6573	pseudobulk	DESeq2	LRT	glmGamPoi	scranSumFactors
Selenok	7dpi	-0.640985		2053.04	2.21263e-05	0.000962039	-4.24228	-3.3014	40.65	pseudobulk	DESeq2	LRT	glmGamPoi	scranSumFactors
Mrfap1	7dpi	-0.710672		1336.03	2.24816e-05	0.000971316	-4.2387	-3.29871	40.5234	pseudobulk	DESeq2	LRT	glmGamPoi	scranSumFactors
Fam83d	7dpi	2.1061		19.2845	2.25166e-05	0.000971316	4.23835	3.29871	40.511	pseudobulk	DESeq2	LRT	glmGamPoi	scranSumFactors
Rps21	7dpi	-0.584761		2179.2	2.25185e-05	0.000971316	-4.23833	-3.29871	40.5103	pseudobulk	DESeq2	LRT	glmGamPoi	scranSumFactors
Rhoc	7dpi	-0.943764		56.1267	2.25235e-05	0.000971316	-4.23828	-3.29871	40.5086	pseudobulk	DESeq2	LRT	glmGamPoi	scranSumFactors
Serpine3	7dpi	-1.06682		81.286	2.27115e-05	0.000974257	-4.23642	-3.29786	40.4426	pseudobulk	DESeq2	LRT	glmGamPoi	scranSumFactors
Gpr34	7dpi	-1.48174		49.3039	2.27126e-05	0.000974257	-4.23641	-3.29786	40.4422	pseudobulk	DESeq2	LRT	glmGamPoi	scranSumFactors
Rpl37a	7dpi	-0.612506		1796.44	2.27301e-05	0.000974257	-4.23623	-3.29786	40.4361	pseudobulk	DESeq2	LRT	glmGamPoi	scranSumFactors
Snap91	7dpi	0.303236		3169.14	2.29264e-05	0.000977902	4.2343	3.29681	40.368	pseudobulk	DESeq2	LRT	glmGamPoi	scranSumFactors
Tmem160	7dpi	-0.536708		286.739	2.29265e-05	0.000977902	-4.2343	-3.29681	40.3679	pseudobulk	DESeq2	LRT	glmGamPoi	scranSumFactors
Ccdc85a	7dpi	0.478381		4673.12	2.29539e-05	0.000977902	4.23403	3.29681	40.3585	pseudobulk	DESeq2	LRT	glmGamPoi	scranSumFactors
Immp1l	7dpi	-0.425658		1217.3	2.35689e-05	0.00100208	-4.22808	-3.28994	40.1496	pseudobulk	DESeq2	LRT	glmGamPoi	scranSumFactors
ENSMUSG00000117942	7dpi	0.67771		177.753	2.37044e-05	0.00100582	4.22679	3.28889	40.1044	pseudobulk	DESeq2	LRT	glmGamPoi	scranSumFactors
Rex1bd	7dpi	-0.659314		367.97	2.39974e-05	0.00101534	-4.22403	-3.28624	40.0076	pseudobulk	DESeq2	LRT	glmGamPoi	scranSumFactors
Tmem100	7dpi	-0.935256		94.0207	2.40249e-05	0.00101534	-4.22377	-3.28624	39.9987	pseudobulk	DESeq2	LRT	glmGamPoi	scranSumFactors
Ubxn1	7dpi	-0.491245		450.886	2.41077e-05	0.00101608	-4.223	-3.28604	39.9716	pseudobulk	DESeq2	LRT	glmGamPoi	scranSumFactors
Rpl27a	7dpi	-0.710441		1865.1	2.41749e-05	0.00101608	-4.22237	-3.28604	39.9497	pseudobulk	DESeq2	LRT	glmGamPoi	scranSumFactors
Rbx1	7dpi	-0.457666		1115.06	2.41867e-05	0.00101608	-4.22226	-3.28604	39.9459	pseudobulk	DESeq2	LRT	glmGamPoi	scranSumFactors
Uba52	7dpi	-0.621741		1188.72	2.49355e-05	0.00104546	-4.21538	-3.278	39.7069	pseudobulk	DESeq2	LRT	glmGamPoi	scranSumFactors
Znrd2	7dpi	-0.699106		155.371	2.54393e-05	0.00106447	-4.21087	-3.27291	39.5508	pseudobulk	DESeq2	LRT	glmGamPoi	scranSumFactors
Flt1	7dpi	-1.0897		96.9418	2.554e-05	0.00106657	-4.20997	-3.27235	39.52	pseudobulk	DESeq2	LRT	glmGamPoi	scranSumFactors
Plin4	7dpi	4.29748		102.155	2.56068e-05	0.00106725	4.20938	3.27217	39.4997	pseudobulk	DESeq2	LRT	glmGamPoi	scranSumFactors
Alkbh7	7dpi	-0.610573		182.154	2.57228e-05	0.00106857	-4.20836	-3.27182	39.4645	pseudobulk	DESeq2	LRT	glmGamPoi	scranSumFactors
Rpl31	7dpi	-0.810316		484.177	2.57396e-05	0.00106857	-4.20822	-3.27182	39.4594	pseudobulk	DESeq2	LRT	glmGamPoi	scranSumFactors
ENSMUSG00000104677	7dpi	-0.634082		184.766	2.58263e-05	0.00107007	-4.20745	-3.27142	39.4332	pseudobulk	DESeq2	LRT	glmGamPoi	scranSumFactors
Tusc2	7dpi	-0.755117		231.567	2.60262e-05	0.00107624	-4.20571	-3.2698	39.3733	pseudobulk	DESeq2	LRT	glmGamPoi	scranSumFactors
Hsd17b10	7dpi	-0.750568		133.793	2.70361e-05	0.00111547	-4.19709	-3.25966	39.0784	pseudobulk	DESeq2	LRT	glmGamPoi	scranSumFactors
Phyhd1	7dpi	1.48331		179.891	2.70804e-05	0.00111547	4.19672	3.25966	39.0657	pseudobulk	DESeq2	LRT	glmGamPoi	scranSumFactors
Brk1	7dpi	-0.378261		709.911	2.75414e-05	0.00113225	-4.1929	-3.25542	38.9356	pseudobulk	DESeq2	LRT	glmGamPoi	scranSumFactors
Slc9a3r1	7dpi	-0.737583		94.753	2.76675e-05	0.00113365	-4.19186	-3.25507	38.9004	pseudobulk	DESeq2	LRT	glmGamPoi	scranSumFactors
Speer6-ps1	7dpi	-0.74523		105.73	2.76826e-05	0.00113365	-4.19174	-3.25507	38.8962	pseudobulk	DESeq2	LRT	glmGamPoi	scranSumFactors
Glrx2	7dpi	-0.448786		551.612	2.78163e-05	0.00113595	-4.19065	-3.25449	38.8591	pseudobulk	DESeq2	LRT	glmGamPoi	scranSumFactors
Prelid3b	7dpi	-0.735615		176.834	2.78464e-05	0.00113595	-4.1904	-3.25449	38.8508	pseudobulk	DESeq2	LRT	glmGamPoi	scranSumFactors
Sf3b5	7dpi	-0.735747		367.314	2.79182e-05	0.00113668	-4.18982	-3.25431	38.831	pseudobulk	DESeq2	LRT	glmGamPoi	scranSumFactors
ENSMUSG00000097911	7dpi	0.592154		2810.82	2.80066e-05	0.00113809	4.1891	3.25396	38.8067	pseudobulk	DESeq2	LRT	glmGamPoi	scranSumFactors
ENSMUSG00000086157	7dpi	-0.621555		157.253	2.82248e-05	0.00114475	-4.18734	-3.2523	38.7471	pseudobulk	DESeq2	LRT	glmGamPoi	scranSumFactors
Brinp3	7dpi	0.339363		10970.3	2.84684e-05	0.00115243	4.18538	3.2504	38.6812	pseudobulk	DESeq2	LRT	glmGamPoi	scranSumFactors
Dusp3	7dpi	-0.414299		509.588	2.87953e-05	0.00116343	-4.18279	-3.2477	38.5938	pseudobulk	DESeq2	LRT	glmGamPoi	scranSumFactors
Ftl1	7dpi	-0.580416		1052.98	2.89703e-05	0.00116827	-4.18141	-3.24652	38.5475	pseudobulk	DESeq2	LRT	glmGamPoi	scranSumFactors
Atpif1	7dpi	-0.554357		2769.07	2.91253e-05	0.00116858	-4.1802	-3.24644	38.5067	pseudobulk	DESeq2	LRT	glmGamPoi	scranSumFactors
A430090L17Rik	7dpi	-0.833503		81.4236	2.91695e-05	0.00116858	-4.17986	-3.24644	38.4951	pseudobulk	DESeq2	LRT	glmGamPoi	scranSumFactors
Got1	7dpi	-0.543469		1029.23	2.91906e-05	0.00116858	-4.17969	-3.24644	38.4896	pseudobulk	DESeq2	LRT	glmGamPoi	scranSumFactors
Ly6a	7dpi	-1.45781		34.518	2.92234e-05	0.00116858	-4.17944	-3.24644	38.481	pseudobulk	DESeq2	LRT	glmGamPoi	scranSumFactors
ENSMUSG00000114303	7dpi	-0.697406		131.398	2.92545e-05	0.00116858	-4.17919	-3.24644	38.4729	pseudobulk	DESeq2	LRT	glmGamPoi	scranSumFactors
Slc25a5	7dpi	-0.788834		727.078	2.94019e-05	0.00117225	-4.17805	-3.24555	38.4346	pseudobulk	DESeq2	LRT	glmGamPoi	scranSumFactors
Eif2s2	7dpi	-0.542854		1061.5	2.94766e-05	0.00117301	-4.17747	-3.24536	38.4152	pseudobulk	DESeq2	LRT	glmGamPoi	scranSumFactors
Mrps12	7dpi	-0.678608		561.961	2.95447e-05	0.00117351	-4.17695	-3.24524	38.3976	pseudobulk	DESeq2	LRT	glmGamPoi	scranSumFactors
Rpl36a	7dpi	-0.785515		301.667	2.96216e-05	0.00117385	-4.17636	-3.24516	38.3778	pseudobulk	DESeq2	LRT	glmGamPoi	scranSumFactors
Dpm3	7dpi	-0.671726		539.35	2.96881e-05	0.00117385	-4.17585	-3.24516	38.3607	pseudobulk	DESeq2	LRT	glmGamPoi	scranSumFactors
Efhd2	7dpi	-0.509386		365.334	2.97525e-05	0.00117385	-4.17535	-3.24516	38.3442	pseudobulk	DESeq2	LRT	glmGamPoi	scranSumFactors
Mrpl52	7dpi	-0.663549		621.427	2.97755e-05	0.00117385	-4.17518	-3.24516	38.3384	pseudobulk	DESeq2	LRT	glmGamPoi	scranSumFactors
Irak4	7dpi	-0.528648		219.045	2.99594e-05	0.0011789	-4.17377	-3.24394	38.2915	pseudobulk	DESeq2	LRT	glmGamPoi	scranSumFactors
Hcrt	7dpi	-3.95594		789.997	3.00394e-05	0.00117985	-4.17317	-3.24371	38.2712	pseudobulk	DESeq2	LRT	glmGamPoi	scranSumFactors
Ccdc7b	7dpi	-0.679923		147.377	3.01794e-05	0.00118316	-4.17211	-3.24291	38.2359	pseudobulk	DESeq2	LRT	glmGamPoi	scranSumFactors
Chchd1	7dpi	-0.51397		469.319	3.03317e-05	0.00118693	-4.17096	-3.242	38.1977	pseudobulk	DESeq2	LRT	glmGamPoi	scranSumFactors
Pfdn1	7dpi	-0.375897		1168.8	3.04343e-05	0.00118874	-4.17019	-3.24157	38.172	pseudobulk	DESeq2	LRT	glmGamPoi	scranSumFactors
ENSMUSG00000118604	7dpi	0.517631		2017.78	3.08188e-05	0.00120154	4.16733	3.23852	38.0769	pseudobulk	DESeq2	LRT	glmGamPoi	scranSumFactors
Psmb6	7dpi	-0.68648		774.38	3.09758e-05	0.00120543	-4.16617	-3.23759	38.0384	pseudobulk	DESeq2	LRT	glmGamPoi	scranSumFactors
Ier5	7dpi	-0.733224		87.9347	3.12555e-05	0.00121269	-4.16412	-3.23588	37.9705	pseudobulk	DESeq2	LRT	glmGamPoi	scranSumFactors
Nkiras1	7dpi	-0.533601		848.76	3.1277e-05	0.00121269	-4.16396	-3.23588	37.9653	pseudobulk	DESeq2	LRT	glmGamPoi	scranSumFactors
Cnpy2	7dpi	-0.796641		595.025	3.14279e-05	0.00121442	-4.16286	-3.23547	37.9289	pseudobulk	DESeq2	LRT	glmGamPoi	scranSumFactors
ENSMUSG00000113358	7dpi	-0.815408		80.4111	3.14652e-05	0.00121442	-4.16259	-3.23547	37.92	pseudobulk	DESeq2	LRT	glmGamPoi	scranSumFactors
ENSMUSG00000097330	7dpi	-0.519432		254.029	3.14942e-05	0.00121442	-4.16238	-3.23547	37.913	pseudobulk	DESeq2	LRT	glmGamPoi	scranSumFactors
Cldn5	7dpi	-2.02791		29.5995	3.16679e-05	0.0012189	-4.16113	-3.23442	37.8715	pseudobulk	DESeq2	LRT	glmGamPoi	scranSumFactors
Sugt1	7dpi	-0.350095		753.135	3.20819e-05	0.00123163	-4.15816	-3.23145	37.7737	pseudobulk	DESeq2	LRT	glmGamPoi	scranSumFactors
Uqcc3	7dpi	-0.560312		196.564	3.21154e-05	0.00123163	-4.15792	-3.23145	37.7658	pseudobulk	DESeq2	LRT	glmGamPoi	scranSumFactors
Med19	7dpi	-0.590413		257.685	3.26245e-05	0.00124673	-4.15433	-3.22797	37.6476	pseudobulk	DESeq2	LRT	glmGamPoi	scranSumFactors
Dhrs7	7dpi	-0.619289		327.777	3.26272e-05	0.00124673	-4.15431	-3.22797	37.647	pseudobulk	DESeq2	LRT	glmGamPoi	scranSumFactors
Tceal1	7dpi	-0.769794		348.593	3.27265e-05	0.00124827	-4.15361	-3.22761	37.6242	pseudobulk	DESeq2	LRT	glmGamPoi	scranSumFactors
Nyap2	7dpi	0.403861		2546.65	3.30872e-05	0.00125762	4.15111	3.22548	37.542	pseudobulk	DESeq2	LRT	glmGamPoi	scranSumFactors
Eif3k	7dpi	-0.691423		686.369	3.30905e-05	0.00125762	-4.15108	-3.22548	37.5413	pseudobulk	DESeq2	LRT	glmGamPoi	scranSumFactors
Rps27a	7dpi	-0.681891		1792.98	3.33456e-05	0.00126504	-4.14933	-3.2238	37.4837	pseudobulk	DESeq2	LRT	glmGamPoi	scranSumFactors
Pdcd5	7dpi	-0.681768		493.265	3.34487e-05	0.00126668	-4.14862	-3.22342	37.4607	pseudobulk	DESeq2	LRT	glmGamPoi	scranSumFactors
Pla2g7	7dpi	-0.786627		991.409	3.36384e-05	0.00126983	-4.14732	-3.22271	37.4184	pseudobulk	DESeq2	LRT	glmGamPoi	scranSumFactors
Rpgrip1	7dpi	-0.622726		364.025	3.3655e-05	0.00126983	-4.14721	-3.22271	37.4147	pseudobulk	DESeq2	LRT	glmGamPoi	scranSumFactors
Prdx6	7dpi	-0.513416		778.775	3.37123e-05	0.00126983	-4.14682	-3.22271	37.402	pseudobulk	DESeq2	LRT	glmGamPoi	scranSumFactors
Actg1	7dpi	-0.667917		2208.14	3.38495e-05	0.00127273	-4.14589	-3.22206	37.3717	pseudobulk	DESeq2	LRT	glmGamPoi	scranSumFactors
Lysmd2	7dpi	-0.562717		415.156	3.40873e-05	0.00127939	-4.14429	-3.22056	37.3194	pseudobulk	DESeq2	LRT	glmGamPoi	scranSumFactors
S100a10	7dpi	-0.767154		135.248	3.42237e-05	0.00128224	-4.14337	-3.21993	37.2896	pseudobulk	DESeq2	LRT	glmGamPoi	scranSumFactors
Prdx3	7dpi	-0.555895		337.812	3.44002e-05	0.00128657	-4.14219	-3.21896	37.2513	pseudobulk	DESeq2	LRT	glmGamPoi	scranSumFactors
Bet1	7dpi	-0.478869		258.827	3.45423e-05	0.0012896	-4.14125	-3.21828	37.2206	pseudobulk	DESeq2	LRT	glmGamPoi	scranSumFactors
Rpl41	7dpi	-0.576657		3855.31	3.46885e-05	0.00129278	-4.14028	-3.21758	37.1892	pseudobulk	DESeq2	LRT	glmGamPoi	scranSumFactors
Smim10l1	7dpi	-0.482694		701.503	3.50422e-05	0.00130366	-4.13795	-3.21517	37.1138	pseudobulk	DESeq2	LRT	glmGamPoi	scranSumFactors
Vmn2r-ps25	7dpi	-0.739378		110.934	3.51462e-05	0.00130523	-4.13727	-3.21483	37.0918	pseudobulk	DESeq2	LRT	glmGamPoi	scranSumFactors
Psmd8	7dpi	-0.524062		321.494	3.55174e-05	0.0013167	-4.13486	-3.21232	37.0139	pseudobulk	DESeq2	LRT	glmGamPoi	scranSumFactors
Esd	7dpi	-0.697099		573.762	3.58062e-05	0.00132333	-4.133	-3.21087	36.9539	pseudobulk	DESeq2	LRT	glmGamPoi	scranSumFactors
Hypk	7dpi	-0.641415		633.796	3.58214e-05	0.00132333	-4.1329	-3.21087	36.9508	pseudobulk	DESeq2	LRT	glmGamPoi	scranSumFactors
Sf3b6	7dpi	-0.590691		733.57	3.58993e-05	0.00132389	-4.1324	-3.21075	36.9347	pseudobulk	DESeq2	LRT	glmGamPoi	scranSumFactors
Commd3	7dpi	-0.47551		516.678	3.59893e-05	0.00132452	-4.13183	-3.21061	36.9162	pseudobulk	DESeq2	LRT	glmGamPoi	scranSumFactors
Insr	7dpi	0.307169		1596.37	3.60419e-05	0.00132452	4.13149	3.21061	36.9054	pseudobulk	DESeq2	LRT	glmGamPoi	scranSumFactors
Zfp428	7dpi	-0.706216		247.463	3.6378e-05	0.00133456	-4.12936	-3.20844	36.8368	pseudobulk	DESeq2	LRT	glmGamPoi	scranSumFactors
Ndfip2	7dpi	-0.399864		1366.72	3.64491e-05	0.00133485	-4.12891	-3.20838	36.8224	pseudobulk	DESeq2	LRT	glmGamPoi	scranSumFactors
Kcnh7	7dpi	0.306131		6385.41	3.68452e-05	0.00134701	4.12642	3.20577	36.7427	pseudobulk	DESeq2	LRT	glmGamPoi	scranSumFactors
Arrdc2	7dpi	1.89584		203.252	3.69087e-05	0.00134701	4.12603	3.20577	36.73	pseudobulk	DESeq2	LRT	glmGamPoi	scranSumFactors
Rpl26	7dpi	-0.58002		1449.66	3.7154e-05	0.00135362	-4.1245	-3.20436	36.6812	pseudobulk	DESeq2	LRT	glmGamPoi	scranSumFactors
Cacybp	7dpi	-0.810255		698.52	3.73254e-05	0.00135752	-4.12344	-3.20353	36.6473	pseudobulk	DESeq2	LRT	glmGamPoi	scranSumFactors
Mrpl15	7dpi	-0.470743		402.093	3.74047e-05	0.00135807	-4.12295	-3.20342	36.6317	pseudobulk	DESeq2	LRT	glmGamPoi	scranSumFactors
Calm3	7dpi	-0.488054		1214.73	3.75276e-05	0.0013602	-4.1222	-3.20297	36.6076	pseudobulk	DESeq2	LRT	glmGamPoi	scranSumFactors
Mgst3	7dpi	-0.575885		590.613	3.78019e-05	0.0013678	-4.12052	-3.20136	36.5541	pseudobulk	DESeq2	LRT	glmGamPoi	scranSumFactors
ENSMUSG00000115923	7dpi	-0.846526		168.618	3.79285e-05	0.00137003	-4.11975	-3.20089	36.5296	pseudobulk	DESeq2	LRT	glmGamPoi	scranSumFactors
Gm19016	7dpi	-1.00518		101.517	3.80232e-05	0.00137111	-4.11917	-3.20067	36.5113	pseudobulk	DESeq2	LRT	glmGamPoi	scranSumFactors
ENSMUSG00000085439	7dpi	-0.41048		407.424	3.81414e-05	0.00137303	-4.11846	-3.20026	36.4885	pseudobulk	DESeq2	LRT	glmGamPoi	scranSumFactors
8030451O07Rik	7dpi	-0.994866		67.5789	3.85378e-05	0.00138262	-4.11608	-3.19825	36.4128	pseudobulk	DESeq2	LRT	glmGamPoi	scranSumFactors
Bccip	7dpi	-0.461954		314.416	3.85389e-05	0.00138262	-4.11607	-3.19825	36.4126	pseudobulk	DESeq2	LRT	glmGamPoi	scranSumFactors
ENSMUSG00000116588	7dpi	-1.34399		23.1936	3.90438e-05	0.00139836	-4.11307	-3.19499	36.3174	pseudobulk	DESeq2	LRT	glmGamPoi	scranSumFactors
Mat2b	7dpi	-0.497476		334.111	3.93109e-05	0.00140555	-4.11149	-3.19351	36.2676	pseudobulk	DESeq2	LRT	glmGamPoi	scranSumFactors
Coprs	7dpi	-0.666613		350.703	3.99903e-05	0.00142742	-4.10754	-3.18905	36.1427	pseudobulk	DESeq2	LRT	glmGamPoi	scranSumFactors
Fastkd2	7dpi	-0.485765		249.089	4.01336e-05	0.00142975	-4.10671	-3.18858	36.1167	pseudobulk	DESeq2	LRT	glmGamPoi	scranSumFactors
Gamt	7dpi	-0.918406		149.102	4.01931e-05	0.00142975	-4.10637	-3.18858	36.1059	pseudobulk	DESeq2	LRT	glmGamPoi	scranSumFactors
Ppdpf	7dpi	-0.678171		310.999	4.03603e-05	0.00142975	-4.10541	-3.18858	36.0757	pseudobulk	DESeq2	LRT	glmGamPoi	scranSumFactors
Gnpda2	7dpi	-0.533593		262.836	4.03862e-05	0.00142975	-4.10526	-3.18858	36.0711	pseudobulk	DESeq2	LRT	glmGamPoi	scranSumFactors
Myo5a	7dpi	0.31043		2531.37	4.03939e-05	0.00142975	4.10522	3.18858	36.0697	pseudobulk	DESeq2	LRT	glmGamPoi	scranSumFactors
Rplp1	7dpi	-0.574194		2969.51	4.06011e-05	0.00142986	-4.10403	-3.18855	36.0325	pseudobulk	DESeq2	LRT	glmGamPoi	scranSumFactors
Rdh5	7dpi	-0.760341		298.505	4.06432e-05	0.00142986	-4.10379	-3.18855	36.025	pseudobulk	DESeq2	LRT	glmGamPoi	scranSumFactors
Hras	7dpi	-0.660647		740.795	4.06666e-05	0.00142986	-4.10366	-3.18855	36.0208	pseudobulk	DESeq2	LRT	glmGamPoi	scranSumFactors
Rack1	7dpi	-0.618		575.33	4.06676e-05	0.00142986	-4.10365	-3.18855	36.0206	pseudobulk	DESeq2	LRT	glmGamPoi	scranSumFactors
Tmem205	7dpi	-0.47739		405.305	4.0789e-05	0.00143175	-4.10296	-3.18817	35.999	pseudobulk	DESeq2	LRT	glmGamPoi	scranSumFactors
ENSMUSG00000109854	7dpi	-0.679181		184.874	4.09669e-05	0.00143551	-4.10196	-3.18741	35.9674	pseudobulk	DESeq2	LRT	glmGamPoi	scranSumFactors
Meg3	7dpi	0.347249		88595	4.10321e-05	0.00143551	4.10159	3.18741	35.9559	pseudobulk	DESeq2	LRT	glmGamPoi	scranSumFactors
Txndc17	7dpi	-0.841079		317.378	4.12398e-05	0.00144039	-4.10042	-3.18643	35.9193	pseudobulk	DESeq2	LRT	glmGamPoi	scranSumFactors
Rpl23	7dpi	-0.605441		1939.08	4.13775e-05	0.00144104	-4.09965	-3.1863	35.8952	pseudobulk	DESeq2	LRT	glmGamPoi	scranSumFactors
Mdh2	7dpi	-0.656362		1226.63	4.13947e-05	0.00144104	-4.09955	-3.1863	35.8922	pseudobulk	DESeq2	LRT	glmGamPoi	scranSumFactors
ENSMUSG00000113895	7dpi	-0.661693		207.967	4.18282e-05	0.00145374	-4.09714	-3.18376	35.8168	pseudobulk	DESeq2	LRT	glmGamPoi	scranSumFactors
Smim8	7dpi	-0.605063		202.067	4.24249e-05	0.00147205	-4.09386	-3.18014	35.7145	pseudobulk	DESeq2	LRT	glmGamPoi	scranSumFactors
H2bu2	7dpi	-0.710396		320.32	4.25309e-05	0.00147258	-4.09328	-3.18003	35.6965	pseudobulk	DESeq2	LRT	glmGamPoi	scranSumFactors
Tomm5	7dpi	-0.547379		449.265	4.26306e-05	0.00147258	-4.09274	-3.18003	35.6796	pseudobulk	DESeq2	LRT	glmGamPoi	scranSumFactors
Ccdc73	7dpi	-0.518948		279.818	4.26492e-05	0.00147258	-4.09264	-3.18003	35.6765	pseudobulk	DESeq2	LRT	glmGamPoi	scranSumFactors
Pin4	7dpi	-0.62734		147.702	4.27982e-05	0.00147309	-4.09183	-3.17993	35.6513	pseudobulk	DESeq2	LRT	glmGamPoi	scranSumFactors
Mdh1	7dpi	-0.66501		3010.18	4.28492e-05	0.00147309	-4.09155	-3.17993	35.6428	pseudobulk	DESeq2	LRT	glmGamPoi	scranSumFactors
ENSMUSG00000111593	7dpi	-0.596741		688.205	4.28751e-05	0.00147309	-4.09141	-3.17993	35.6384	pseudobulk	DESeq2	LRT	glmGamPoi	scranSumFactors
Arf5	7dpi	-0.431392		1244.51	4.29427e-05	0.00147309	-4.09105	-3.17993	35.6271	pseudobulk	DESeq2	LRT	glmGamPoi	scranSumFactors
Bex3	7dpi	-0.78614		1756.47	4.31226e-05	0.00147686	-4.09008	-3.17919	35.597	pseudobulk	DESeq2	LRT	glmGamPoi	scranSumFactors
Dnajc19	7dpi	-0.443228		828.527	4.33017e-05	0.00147878	-4.08912	-3.17882	35.5672	pseudobulk	DESeq2	LRT	glmGamPoi	scranSumFactors
Rpl24	7dpi	-0.694905		1945.9	4.33642e-05	0.00147878	-4.08878	-3.17882	35.5568	pseudobulk	DESeq2	LRT	glmGamPoi	scranSumFactors
Lrrtm4	7dpi	0.409722		36816.8	4.33886e-05	0.00147878	4.08865	3.17882	35.5527	pseudobulk	DESeq2	LRT	glmGamPoi	scranSumFactors
Cox20	7dpi	-0.579685		398.168	4.34872e-05	0.00147897	-4.08813	-3.17878	35.5364	pseudobulk	DESeq2	LRT	glmGamPoi	scranSumFactors
Fkbp2	7dpi	-0.671328		1537.39	4.3534e-05	0.00147897	-4.08788	-3.17878	35.5287	pseudobulk	DESeq2	LRT	glmGamPoi	scranSumFactors
Dock2	7dpi	-0.673942		150.898	4.37248e-05	0.00148306	-4.08686	-3.17798	35.4973	pseudobulk	DESeq2	LRT	glmGamPoi	scranSumFactors
Pclo	7dpi	0.294364		7592.6	4.39285e-05	0.00148758	4.08578	3.17709	35.4639	pseudobulk	DESeq2	LRT	glmGamPoi	scranSumFactors
Ggh	7dpi	-0.600685		295.707	4.42468e-05	0.00149597	-4.08411	-3.17546	35.4121	pseudobulk	DESeq2	LRT	glmGamPoi	scranSumFactors
Eef1akmt1	7dpi	-0.549818		390.116	4.44767e-05	0.0014999	-4.0829	-3.1747	35.375	pseudobulk	DESeq2	LRT	glmGamPoi	scranSumFactors
Kndc1	7dpi	0.4702		931.676	4.45052e-05	0.0014999	4.08275	3.1747	35.3704	pseudobulk	DESeq2	LRT	glmGamPoi	scranSumFactors
ENSMUSG00000085456	7dpi	-0.462995		1258.92	4.45893e-05	0.00150034	-4.08232	-3.17462	35.3569	pseudobulk	DESeq2	LRT	glmGamPoi	scranSumFactors
ENSMUSG00000118125	7dpi	-0.57453		303.274	4.47163e-05	0.00150223	-4.08165	-3.17425	35.3365	pseudobulk	DESeq2	LRT	glmGamPoi	scranSumFactors
Cox14	7dpi	-0.574869		553.538	4.481e-05	0.00150299	-4.08117	-3.17411	35.3215	pseudobulk	DESeq2	LRT	glmGamPoi	scranSumFactors
Ccdc124	7dpi	-0.673371		305.686	4.52904e-05	0.00151669	-4.07869	-3.17147	35.2453	pseudobulk	DESeq2	LRT	glmGamPoi	scranSumFactors
Acr	7dpi	0.984255		118.245	4.5444e-05	0.00151943	4.0779	3.17095	35.2212	pseudobulk	DESeq2	LRT	glmGamPoi	scranSumFactors
ENSMUSG00000084917	7dpi	-1.08443		67.5887	4.56603e-05	0.00152425	-4.0768	-3.17003	35.1873	pseudobulk	DESeq2	LRT	glmGamPoi	scranSumFactors
Atp1b2	7dpi	-0.532395		1429.15	4.58737e-05	0.00152687	-4.07571	-3.16953	35.154	pseudobulk	DESeq2	LRT	glmGamPoi	scranSumFactors
Rps12	7dpi	-0.546426		236.478	4.58833e-05	0.00152687	-4.07566	-3.16953	35.1525	pseudobulk	DESeq2	LRT	glmGamPoi	scranSumFactors
BC031181	7dpi	-0.554013		1088.36	4.67983e-05	0.00155277	-4.07107	-3.16464	35.012	pseudobulk	DESeq2	LRT	glmGamPoi	scranSumFactors
4930586N03Rik	7dpi	-0.640407		139.958	4.70113e-05	0.00155277	-4.07001	-3.16464	34.9797	pseudobulk	DESeq2	LRT	glmGamPoi	scranSumFactors
Ank3	7dpi	0.284887		17910.9	4.70164e-05	0.00155277	4.06998	3.16464	34.9789	pseudobulk	DESeq2	LRT	glmGamPoi	scranSumFactors
Gpx4	7dpi	-0.638165		1564.98	4.70257e-05	0.00155277	-4.06994	-3.16464	34.9775	pseudobulk	DESeq2	LRT	glmGamPoi	scranSumFactors
Mrpl58	7dpi	-0.557806		393.642	4.70291e-05	0.00155277	-4.06992	-3.16464	34.977	pseudobulk	DESeq2	LRT	glmGamPoi	scranSumFactors
Med31	7dpi	-0.556167		391.667	4.73045e-05	0.00155943	-4.06856	-3.16339	34.9356	pseudobulk	DESeq2	LRT	glmGamPoi	scranSumFactors
Ptbp2	7dpi	0.327693		2344.24	4.74985e-05	0.00156185	4.06761	3.16294	34.9065	pseudobulk	DESeq2	LRT	glmGamPoi	scranSumFactors
Rarres1	7dpi	-1.5291		17.7398	4.75605e-05	0.00156185	-4.0673	-3.16294	34.8973	pseudobulk	DESeq2	LRT	glmGamPoi	scranSumFactors
Atp6v1d	7dpi	-0.568481		1164.61	4.75999e-05	0.00156185	-4.06711	-3.16294	34.8914	pseudobulk	DESeq2	LRT	glmGamPoi	scranSumFactors
Svbp	7dpi	-0.615633		161.211	4.78401e-05	0.0015673	-4.06594	-3.16192	34.8558	pseudobulk	DESeq2	LRT	glmGamPoi	scranSumFactors
Gm16833	7dpi	-0.706185		86.4338	4.81783e-05	0.00157385	-4.06429	-3.16071	34.8059	pseudobulk	DESeq2	LRT	glmGamPoi	scranSumFactors
Eif1b	7dpi	-0.714106		985.612	4.81889e-05	0.00157385	-4.06424	-3.16071	34.8043	pseudobulk	DESeq2	LRT	glmGamPoi	scranSumFactors
Supt4a	7dpi	-0.611192		298.362	4.83382e-05	0.00157629	-4.06352	-3.16026	34.7824	pseudobulk	DESeq2	LRT	glmGamPoi	scranSumFactors
Psma6	7dpi	-0.567618		672.134	4.84576e-05	0.00157775	-4.06294	-3.15999	34.765	pseudobulk	DESeq2	LRT	glmGamPoi	scranSumFactors
Pebp1	7dpi	-0.650108		2123.32	4.87367e-05	0.00158439	-4.0616	-3.15876	34.7244	pseudobulk	DESeq2	LRT	glmGamPoi	scranSumFactors
Rras	7dpi	-0.988793		41.6077	4.91618e-05	0.00159381	-4.05958	-3.15704	34.6631	pseudobulk	DESeq2	LRT	glmGamPoi	scranSumFactors
Sdf2l1	7dpi	-0.871759		127.036	4.92462e-05	0.00159381	-4.05918	-3.15704	34.651	pseudobulk	DESeq2	LRT	glmGamPoi	scranSumFactors
Atg3	7dpi	-0.386056		793.948	4.93956e-05	0.00159381	-4.05847	-3.15704	34.6297	pseudobulk	DESeq2	LRT	glmGamPoi	scranSumFactors
Papola	7dpi	0.269741		2327.83	4.9408e-05	0.00159381	4.05841	3.15704	34.6279	pseudobulk	DESeq2	LRT	glmGamPoi	scranSumFactors
Psma2	7dpi	-0.495382		1240.84	4.95374e-05	0.00159381	-4.0578	-3.15704	34.6095	pseudobulk	DESeq2	LRT	glmGamPoi	scranSumFactors
ENSMUSG00000111160	7dpi	-0.894259		175.971	4.95621e-05	0.00159381	-4.05768	-3.15704	34.6059	pseudobulk	DESeq2	LRT	glmGamPoi	scranSumFactors
Tbkbp1	7dpi	0.474006		326.664	4.95854e-05	0.00159381	4.05757	3.15704	34.6026	pseudobulk	DESeq2	LRT	glmGamPoi	scranSumFactors
ENSMUSG00000096006	7dpi	-0.686249		148.262	4.96298e-05	0.00159381	-4.05736	-3.15704	34.5963	pseudobulk	DESeq2	LRT	glmGamPoi	scranSumFactors
Oxt	7dpi	-4.09935		37.3965	4.97327e-05	0.00159455	-4.05688	-3.1569	34.5817	pseudobulk	DESeq2	LRT	glmGamPoi	scranSumFactors
Hnrnpm	7dpi	0.32423		1276.25	4.98037e-05	0.00159455	4.05655	3.1569	34.5717	pseudobulk	DESeq2	LRT	glmGamPoi	scranSumFactors
Tmed5	7dpi	-0.470355		538.74	4.99107e-05	0.00159556	-4.05604	-3.15672	34.5566	pseudobulk	DESeq2	LRT	glmGamPoi	scranSumFactors
Cetn2	7dpi	-0.810629		136.67	5.01858e-05	0.00160036	-4.05476	-3.15584	34.5179	pseudobulk	DESeq2	LRT	glmGamPoi	scranSumFactors
Mid1ip1	7dpi	-0.791519		376.467	5.02737e-05	0.00160036	-4.05435	-3.15584	34.5056	pseudobulk	DESeq2	LRT	glmGamPoi	scranSumFactors
Hnrnpa0	7dpi	-0.572747		619.869	5.02881e-05	0.00160036	-4.05428	-3.15584	34.5036	pseudobulk	DESeq2	LRT	glmGamPoi	scranSumFactors
ENSMUSG00000100341	7dpi	-2.08946		36.7574	5.07196e-05	0.00160721	-4.05229	-3.1546	34.4436	pseudobulk	DESeq2	LRT	glmGamPoi	scranSumFactors
Gm31747	7dpi	-0.986701		41.4531	5.07271e-05	0.00160721	-4.05225	-3.1546	34.4425	pseudobulk	DESeq2	LRT	glmGamPoi	scranSumFactors
Vcam1	7dpi	-0.930399		159.576	5.07977e-05	0.00160721	-4.05193	-3.1546	34.4328	pseudobulk	DESeq2	LRT	glmGamPoi	scranSumFactors
Rnaseh2c	7dpi	-0.62258		324.679	5.09096e-05	0.00160721	-4.05141	-3.1546	34.4173	pseudobulk	DESeq2	LRT	glmGamPoi	scranSumFactors
Vdac2	7dpi	-0.572585		1231.75	5.0943e-05	0.00160721	-4.05126	-3.1546	34.4127	pseudobulk	DESeq2	LRT	glmGamPoi	scranSumFactors
Mfsd2a	7dpi	1.08684		156.032	5.09597e-05	0.00160721	4.05118	3.1546	34.4104	pseudobulk	DESeq2	LRT	glmGamPoi	scranSumFactors
A930005H10Rik	7dpi	-0.468135		224.897	5.12011e-05	0.00161241	-4.05008	-3.15365	34.3773	pseudobulk	DESeq2	LRT	glmGamPoi	scranSumFactors
Apoe	7dpi	-0.572259		9553.8	5.20791e-05	0.00163763	-4.04609	-3.14912	34.2582	pseudobulk	DESeq2	LRT	glmGamPoi	scranSumFactors
ENSMUSG00000106536	7dpi	-0.739916		133.897	5.25223e-05	0.00164911	-4.04411	-3.14708	34.199	pseudobulk	DESeq2	LRT	glmGamPoi	scranSumFactors
Gstp1	7dpi	-0.762688		1421.65	5.27612e-05	0.00165415	-4.04305	-3.14619	34.1673	pseudobulk	DESeq2	LRT	glmGamPoi	scranSumFactors
Cyp2d36-ps	7dpi	-1.39975		91.8333	5.29472e-05	0.00165752	-4.04222	-3.14559	34.1428	pseudobulk	DESeq2	LRT	glmGamPoi	scranSumFactors
Hecw1	7dpi	0.309406		3628.99	5.31357e-05	0.00166096	4.04139	3.14498	34.118	pseudobulk	DESeq2	LRT	glmGamPoi	scranSumFactors
Ubald2	7dpi	-0.553061		196.455	5.36562e-05	0.00167244	-4.0391	-3.14297	34.0501	pseudobulk	DESeq2	LRT	glmGamPoi	scranSumFactors
Selenoh	7dpi	-0.775913		236.93	5.36661e-05	0.00167244	-4.03906	-3.14297	34.0488	pseudobulk	DESeq2	LRT	glmGamPoi	scranSumFactors
Rpl23a-ps3	7dpi	-0.712739		91.3978	5.37403e-05	0.00167244	-4.03873	-3.14297	34.0392	pseudobulk	DESeq2	LRT	glmGamPoi	scranSumFactors
Ywhae	7dpi	-0.387355		2436.22	5.46142e-05	0.00169714	-4.03495	-3.13867	33.9271	pseudobulk	DESeq2	LRT	glmGamPoi	scranSumFactors
Ndufv2	7dpi	-0.450056		1183.67	5.49422e-05	0.00170482	-4.03354	-3.13735	33.8855	pseudobulk	DESeq2	LRT	glmGamPoi	scranSumFactors
Rpl15	7dpi	-1.01628		277.411	5.52032e-05	0.00171041	-4.03243	-3.13639	33.8526	pseudobulk	DESeq2	LRT	glmGamPoi	scranSumFactors
Hacd4	7dpi	-0.622483		159.827	5.53427e-05	0.00171222	-4.03184	-3.13608	33.8351	pseudobulk	DESeq2	LRT	glmGamPoi	scranSumFactors
Fkbp3	7dpi	-0.654557		1415.51	5.6149e-05	0.00173463	-4.02844	-3.13227	33.7351	pseudobulk	DESeq2	LRT	glmGamPoi	scranSumFactors
Clu	7dpi	-0.543854		2188.83	5.63479e-05	0.00173588	-4.02761	-3.13205	33.7106	pseudobulk	DESeq2	LRT	glmGamPoi	scranSumFactors
Adcy10	7dpi	-0.415814		301.714	5.63538e-05	0.00173588	-4.02758	-3.13205	33.7099	pseudobulk	DESeq2	LRT	glmGamPoi	scranSumFactors
Ndufa9	7dpi	-0.484379		417.549	5.64734e-05	0.00173703	-4.02708	-3.13186	33.6952	pseudobulk	DESeq2	LRT	glmGamPoi	scranSumFactors
Pir	7dpi	-0.660077		179.303	5.69534e-05	0.00174651	-4.02509	-3.13026	33.6368	pseudobulk	DESeq2	LRT	glmGamPoi	scranSumFactors
1700027A15Rik	7dpi	-1.04329		40.5912	5.69722e-05	0.00174651	-4.02501	-3.13026	33.6345	pseudobulk	DESeq2	LRT	glmGamPoi	scranSumFactors
Nalcn	7dpi	0.314231		5102.18	5.70296e-05	0.00174651	4.02478	3.13026	33.6276	pseudobulk	DESeq2	LRT	glmGamPoi	scranSumFactors
ENSMUSG00000111004	7dpi	-1.1946		35.2358	5.71242e-05	0.00174688	-4.02439	-3.1302	33.6162	pseudobulk	DESeq2	LRT	glmGamPoi	scranSumFactors
Fam155a	7dpi	0.372956		28851.3	5.73223e-05	0.00174808	4.02357	3.13	33.5923	pseudobulk	DESeq2	LRT	glmGamPoi	scranSumFactors
Aurkaip1	7dpi	-0.616445		519.577	5.73291e-05	0.00174808	-4.02354	-3.13	33.5915	pseudobulk	DESeq2	LRT	glmGamPoi	scranSumFactors
ENSMUSG00000115693	7dpi	-0.659772		102.619	5.75319e-05	0.00175174	-4.02271	-3.12938	33.5672	pseudobulk	DESeq2	LRT	glmGamPoi	scranSumFactors
ENSMUSG00000108801	7dpi	-0.632149		332.17	5.81294e-05	0.00176441	-4.02028	-3.12726	33.496	pseudobulk	DESeq2	LRT	glmGamPoi	scranSumFactors
Tmem230	7dpi	-0.439206		260.987	5.84625e-05	0.00176441	-4.01893	-3.12726	33.4568	pseudobulk	DESeq2	LRT	glmGamPoi	scranSumFactors
Gpr183	7dpi	-1.41163		26.7183	5.84823e-05	0.00176441	-4.01885	-3.12726	33.4544	pseudobulk	DESeq2	LRT	glmGamPoi	scranSumFactors
ENSMUSG00000089699	7dpi	-0.581143		511.098	5.86362e-05	0.00176441	-4.01823	-3.12726	33.4364	pseudobulk	DESeq2	LRT	glmGamPoi	scranSumFactors
ENSMUSG00000113885	7dpi	-0.958737		105.189	5.86652e-05	0.00176441	-4.01812	-3.12726	33.433	pseudobulk	DESeq2	LRT	glmGamPoi	scranSumFactors
Yipf4	7dpi	-0.490785		861.989	5.86862e-05	0.00176441	-4.01803	-3.12726	33.4305	pseudobulk	DESeq2	LRT	glmGamPoi	scranSumFactors
Cmtm5	7dpi	-0.80651		627.198	5.87978e-05	0.00176441	-4.01758	-3.12726	33.4175	pseudobulk	DESeq2	LRT	glmGamPoi	scranSumFactors
Glo1	7dpi	-0.792875		156.216	5.88698e-05	0.00176441	-4.0173	-3.12726	33.4091	pseudobulk	DESeq2	LRT	glmGamPoi	scranSumFactors
Emc6	7dpi	-0.732502		409.52	5.89188e-05	0.00176441	-4.0171	-3.12726	33.4034	pseudobulk	DESeq2	LRT	glmGamPoi	scranSumFactors
Dtymk	7dpi	-0.429938		417.7	5.89397e-05	0.00176441	-4.01702	-3.12726	33.4009	pseudobulk	DESeq2	LRT	glmGamPoi	scranSumFactors
Nudc	7dpi	-0.641901		762.06	5.8947e-05	0.00176441	-4.01699	-3.12726	33.4001	pseudobulk	DESeq2	LRT	glmGamPoi	scranSumFactors
Ndufs7	7dpi	-0.61181		1138.38	5.90135e-05	0.00176441	-4.01672	-3.12726	33.3924	pseudobulk	DESeq2	LRT	glmGamPoi	scranSumFactors
Rec114	7dpi	-0.542563		155.211	5.90337e-05	0.00176441	-4.01664	-3.12726	33.39	pseudobulk	DESeq2	LRT	glmGamPoi	scranSumFactors
ENSMUSG00000078489	7dpi	-0.499099		1043.96	5.92013e-05	0.00176653	-4.01597	-3.12691	33.3706	pseudobulk	DESeq2	LRT	glmGamPoi	scranSumFactors
Git2	7dpi	0.32166		959.62	5.93651e-05	0.00176653	4.01532	3.12691	33.3516	pseudobulk	DESeq2	LRT	glmGamPoi	scranSumFactors
Slc25a3	7dpi	-0.56219		2080.03	5.9439e-05	0.00176653	-4.01503	-3.12691	33.3431	pseudobulk	DESeq2	LRT	glmGamPoi	scranSumFactors
S100b	7dpi	-0.740256		481.9	5.95064e-05	0.00176653	-4.01476	-3.12691	33.3353	pseudobulk	DESeq2	LRT	glmGamPoi	scranSumFactors
Ninj1	7dpi	-0.763305		143.434	5.95223e-05	0.00176653	-4.0147	-3.12691	33.3335	pseudobulk	DESeq2	LRT	glmGamPoi	scranSumFactors
Mrpl51	7dpi	-0.59874		371.081	6.02019e-05	0.00178274	-4.01202	-3.12422	33.2558	pseudobulk	DESeq2	LRT	glmGamPoi	scranSumFactors
Arhgap24	7dpi	0.4572		2119.6	6.02375e-05	0.00178274	4.01188	3.12422	33.2517	pseudobulk	DESeq2	LRT	glmGamPoi	scranSumFactors
Cdc42	7dpi	-0.396891		2473.53	6.03871e-05	0.00178467	-4.01129	-3.12391	33.2348	pseudobulk	DESeq2	LRT	glmGamPoi	scranSumFactors
Timm17a	7dpi	-0.52802		709.791	6.07204e-05	0.00179202	-4.00999	-3.1227	33.1971	pseudobulk	DESeq2	LRT	glmGamPoi	scranSumFactors
Rpl22l1	7dpi	-0.659186		1828.6	6.08942e-05	0.00179464	-4.00932	-3.12227	33.1776	pseudobulk	DESeq2	LRT	glmGamPoi	scranSumFactors
ENSMUSG00000106457	7dpi	-0.716456		105.85	6.18083e-05	0.00181904	-4.0058	-3.11829	33.076	pseudobulk	DESeq2	LRT	glmGamPoi	scranSumFactors
Ckb	7dpi	-0.538986		5174.37	6.20196e-05	0.00182272	-4.00499	-3.11769	33.0527	pseudobulk	DESeq2	LRT	glmGamPoi	scranSumFactors
Ctsh	7dpi	-1.25238		44.572	6.24328e-05	0.00182998	-4.00342	-3.11652	33.0075	pseudobulk	DESeq2	LRT	glmGamPoi	scranSumFactors
Snx3	7dpi	-0.445774		957.736	6.24397e-05	0.00182998	-4.0034	-3.11652	33.0068	pseudobulk	DESeq2	LRT	glmGamPoi	scranSumFactors
ENSMUSG00000086805	7dpi	-0.528215		328.861	6.31738e-05	0.00184893	-4.00063	-3.11348	32.9273	pseudobulk	DESeq2	LRT	glmGamPoi	scranSumFactors
Lrrc19	7dpi	-0.630357		247.189	6.40553e-05	0.00187213	-3.99735	-3.1098	32.8333	pseudobulk	DESeq2	LRT	glmGamPoi	scranSumFactors
Tma7	7dpi	-0.561007		1006.74	6.44161e-05	0.00187916	-3.99602	-3.10869	32.7953	pseudobulk	DESeq2	LRT	glmGamPoi	scranSumFactors
Rsf1os2	7dpi	-0.570361		195.829	6.46255e-05	0.00187916	-3.99525	-3.10869	32.7733	pseudobulk	DESeq2	LRT	glmGamPoi	scranSumFactors
Slc25a4	7dpi	-0.703441		2676.96	6.46793e-05	0.00187916	-3.99505	-3.10869	32.7677	pseudobulk	DESeq2	LRT	glmGamPoi	scranSumFactors
Mccc2	7dpi	0.328774		708.427	6.46944e-05	0.00187916	3.995	3.10869	32.7661	pseudobulk	DESeq2	LRT	glmGamPoi	scranSumFactors
Cntnap5a	7dpi	0.421535		11712.5	6.47403e-05	0.00187916	3.99483	3.10869	32.7613	pseudobulk	DESeq2	LRT	glmGamPoi	scranSumFactors
Zc3h15	7dpi	-0.448663		1326.33	6.55643e-05	0.00190046	-3.99183	-3.10536	32.6758	pseudobulk	DESeq2	LRT	glmGamPoi	scranSumFactors
Mrps18c	7dpi	-0.5067		303.223	6.57201e-05	0.00190237	-3.99127	-3.10507	32.6598	pseudobulk	DESeq2	LRT	glmGamPoi	scranSumFactors
Capza2	7dpi	-0.402112		845.662	6.65578e-05	0.00192399	-3.98827	-3.10172	32.5744	pseudobulk	DESeq2	LRT	glmGamPoi	scranSumFactors
Slc39a1	7dpi	-0.479426		237.231	6.70354e-05	0.00193368	-3.98657	-3.10023	32.5263	pseudobulk	DESeq2	LRT	glmGamPoi	scranSumFactors
Mrpl18	7dpi	-0.550782		407.767	6.70763e-05	0.00193368	-3.98643	-3.10023	32.5222	pseudobulk	DESeq2	LRT	glmGamPoi	scranSumFactors
Rps23	7dpi	-0.669979		971.039	6.7252e-05	0.00193611	-3.9858	-3.09986	32.5046	pseudobulk	DESeq2	LRT	glmGamPoi	scranSumFactors
ENSMUSG00000097634	7dpi	-0.754361		127.628	6.74734e-05	0.00193984	-3.98502	-3.09929	32.4825	pseudobulk	DESeq2	LRT	glmGamPoi	scranSumFactors
Nsdhl	7dpi	-0.545195		318.14	6.77498e-05	0.00194514	-3.98405	-3.09848	32.455	pseudobulk	DESeq2	LRT	glmGamPoi	scranSumFactors
ENSMUSG00000040904	7dpi	-0.75639		1460.2	6.81392e-05	0.00195366	-3.98269	-3.09719	32.4165	pseudobulk	DESeq2	LRT	glmGamPoi	scranSumFactors
Nfu1	7dpi	-0.496161		553.218	6.84622e-05	0.00195858	-3.98157	-3.09644	32.3847	pseudobulk	DESeq2	LRT	glmGamPoi	scranSumFactors
Rps6kc1	7dpi	0.382142		783.981	6.8532e-05	0.00195858	3.98133	3.09644	32.3779	pseudobulk	DESeq2	LRT	glmGamPoi	scranSumFactors
Slc2a13	7dpi	0.282064		2533.97	6.8617e-05	0.00195858	3.98103	3.09644	32.3696	pseudobulk	DESeq2	LRT	glmGamPoi	scranSumFactors
Eif3i	7dpi	-0.63601		513.857	6.86816e-05	0.00195858	-3.98081	-3.09644	32.3633	pseudobulk	DESeq2	LRT	glmGamPoi	scranSumFactors
Hr	7dpi	1.48903		184.033	6.89748e-05	0.00196235	3.97979	3.09587	32.3347	pseudobulk	DESeq2	LRT	glmGamPoi	scranSumFactors
Gzmc	7dpi	-1.05529		32.9166	6.90499e-05	0.00196235	-3.97954	-3.09587	32.3274	pseudobulk	DESeq2	LRT	glmGamPoi	scranSumFactors
Hspb11	7dpi	-0.477973		330.592	6.90924e-05	0.00196235	-3.97939	-3.09587	32.3233	pseudobulk	DESeq2	LRT	glmGamPoi	scranSumFactors
Ran	7dpi	-0.809087		836.755	6.93875e-05	0.00196809	-3.97838	-3.09501	32.2948	pseudobulk	DESeq2	LRT	glmGamPoi	scranSumFactors
ENSMUSG00000085842	7dpi	-0.911733		54.6723	6.99732e-05	0.00198058	-3.97638	-3.09313	32.2386	pseudobulk	DESeq2	LRT	glmGamPoi	scranSumFactors
Ostc	7dpi	-0.733297		661.267	7.00152e-05	0.00198058	-3.97623	-3.09313	32.2345	pseudobulk	DESeq2	LRT	glmGamPoi	scranSumFactors
Dpy30	7dpi	-0.501165		492.449	7.11689e-05	0.0020105	-3.97234	-3.08868	32.1254	pseudobulk	DESeq2	LRT	glmGamPoi	scranSumFactors
Rps26	7dpi	-0.597754		1459.11	7.12635e-05	0.0020105	-3.97203	-3.08868	32.1166	pseudobulk	DESeq2	LRT	glmGamPoi	scranSumFactors
Aimp1	7dpi	-0.422562		644.308	7.1363e-05	0.00201063	-3.9717	-3.08866	32.1072	pseudobulk	DESeq2	LRT	glmGamPoi	scranSumFactors
Zfp931	7dpi	-0.549517		180.992	7.15545e-05	0.00201334	-3.97106	-3.08826	32.0894	pseudobulk	DESeq2	LRT	glmGamPoi	scranSumFactors
Gm13872	7dpi	-1.72576		12.8538	7.1836e-05	0.00201857	-3.97012	-3.08749	32.0632	pseudobulk	DESeq2	LRT	glmGamPoi	scranSumFactors
Pcna	7dpi	-0.677804		172.796	7.20083e-05	0.00202073	-3.96955	-3.08717	32.0473	pseudobulk	DESeq2	LRT	glmGamPoi	scranSumFactors
ENSMUSG00000101904	7dpi	0.413894		299.201	7.24608e-05	0.00202864	3.96806	3.08601	32.0056	pseudobulk	DESeq2	LRT	glmGamPoi	scranSumFactors
Gabrr2	7dpi	1.60094		137.447	7.24823e-05	0.00202864	3.96799	3.08601	32.0036	pseudobulk	DESeq2	LRT	glmGamPoi	scranSumFactors
Slc16a4	7dpi	-0.753119		158.242	7.29866e-05	0.00203934	-3.96633	-3.08444	31.9575	pseudobulk	DESeq2	LRT	glmGamPoi	scranSumFactors
1700010K23Rik	7dpi	-0.891534		47.5255	7.31495e-05	0.00203934	-3.9658	-3.08444	31.9427	pseudobulk	DESeq2	LRT	glmGamPoi	scranSumFactors
Pakap.1	7dpi	0.445426		1664.54	7.31541e-05	0.00203934	3.96579	3.08444	31.9423	pseudobulk	DESeq2	LRT	glmGamPoi	scranSumFactors
ENSMUSG00000112410	7dpi	-0.888174		198.375	7.34495e-05	0.00204305	-3.96483	-3.0839	31.9156	pseudobulk	DESeq2	LRT	glmGamPoi	scranSumFactors
Man2a2	7dpi	0.320507		818.311	7.34808e-05	0.00204305	3.96472	3.0839	31.9127	pseudobulk	DESeq2	LRT	glmGamPoi	scranSumFactors
Prr13	7dpi	-0.588538		398.89	7.37932e-05	0.00204905	-3.96371	-3.08303	31.8846	pseudobulk	DESeq2	LRT	glmGamPoi	scranSumFactors
Gpcpd1	7dpi	-0.335081		1986.37	7.47465e-05	0.00207279	-3.96065	-3.0796	31.7995	pseudobulk	DESeq2	LRT	glmGamPoi	scranSumFactors
Pop5	7dpi	-0.594082		527.614	7.48718e-05	0.00207342	-3.96025	-3.07951	31.7885	pseudobulk	DESeq2	LRT	glmGamPoi	scranSumFactors
Rpl10a	7dpi	-0.595244		947.752	7.49654e-05	0.00207342	-3.95995	-3.07951	31.7802	pseudobulk	DESeq2	LRT	glmGamPoi	scranSumFactors
Scn2a	7dpi	0.264897		4152.03	7.52202e-05	0.00207775	3.95914	3.07889	31.7577	pseudobulk	DESeq2	LRT	glmGamPoi	scranSumFactors
Sdcbp	7dpi	-0.381606		465.588	7.59238e-05	0.00209445	-3.95692	-3.0765	31.6962	pseudobulk	DESeq2	LRT	glmGamPoi	scranSumFactors
ENSMUSG00000086165	7dpi	0.973209		38.2389	7.6133e-05	0.0020945	3.95626	3.07649	31.6781	pseudobulk	DESeq2	LRT	glmGamPoi	scranSumFactors
Tceal9	7dpi	-0.867285		551.041	7.61758e-05	0.0020945	-3.95612	-3.07649	31.6743	pseudobulk	DESeq2	LRT	glmGamPoi	scranSumFactors
ENSMUSG00000110183	7dpi	-0.826769		56.6364	7.62231e-05	0.0020945	-3.95598	-3.07649	31.6702	pseudobulk	DESeq2	LRT	glmGamPoi	scranSumFactors
Rpl13	7dpi	-0.737139		1955.43	7.63328e-05	0.00209479	-3.95563	-3.07645	31.6608	pseudobulk	DESeq2	LRT	glmGamPoi	scranSumFactors
Sncb	7dpi	-0.563989		1671.51	7.67605e-05	0.00210379	-3.9543	-3.07517	31.6239	pseudobulk	DESeq2	LRT	glmGamPoi	scranSumFactors
Dclk1	7dpi	0.28913		6390.08	7.68731e-05	0.00210415	3.95395	3.07512	31.6142	pseudobulk	DESeq2	LRT	glmGamPoi	scranSumFactors
Klk6	7dpi	-1.30112		79.5155	7.71523e-05	0.00210906	-3.95308	-3.07443	31.5904	pseudobulk	DESeq2	LRT	glmGamPoi	scranSumFactors
D030068K23Rik	7dpi	-0.513878		539.795	7.73549e-05	0.00211097	-3.95245	-3.07416	31.5731	pseudobulk	DESeq2	LRT	glmGamPoi	scranSumFactors
Chrm3	7dpi	0.58309		5267.02	7.75054e-05	0.00211097	3.95199	3.07416	31.5603	pseudobulk	DESeq2	LRT	glmGamPoi	scranSumFactors
Mpdu1	7dpi	-0.482184		285.201	7.75766e-05	0.00211097	-3.95177	-3.07416	31.5542	pseudobulk	DESeq2	LRT	glmGamPoi	scranSumFactors
Rpl5	7dpi	-0.471107		565.699	7.76218e-05	0.00211097	-3.95163	-3.07416	31.5504	pseudobulk	DESeq2	LRT	glmGamPoi	scranSumFactors
Id2	7dpi	-0.532525		329.86	7.80486e-05	0.00211877	-3.95031	-3.07306	31.5143	pseudobulk	DESeq2	LRT	glmGamPoi	scranSumFactors
Rps28	7dpi	-0.666563		906.035	7.8217e-05	0.00211877	-3.9498	-3.07306	31.5002	pseudobulk	DESeq2	LRT	glmGamPoi	scranSumFactors
Msmo1	7dpi	-0.717934		1094.59	7.82975e-05	0.00211877	-3.94955	-3.07306	31.4934	pseudobulk	DESeq2	LRT	glmGamPoi	scranSumFactors
Olfr477	7dpi	-1.33822		27.1693	7.83094e-05	0.00211877	-3.94952	-3.07306	31.4924	pseudobulk	DESeq2	LRT	glmGamPoi	scranSumFactors
Sac3d1	7dpi	-0.856942		75.5194	7.86722e-05	0.00212586	-3.94841	-3.07206	31.462	pseudobulk	DESeq2	LRT	glmGamPoi	scranSumFactors
Timm10	7dpi	-0.674931		189.224	7.88042e-05	0.00212671	-3.94801	-3.07194	31.451	pseudobulk	DESeq2	LRT	glmGamPoi	scranSumFactors
Pigp	7dpi	-0.488541		564.119	7.89239e-05	0.00212722	-3.94764	-3.07187	31.4411	pseudobulk	DESeq2	LRT	glmGamPoi	scranSumFactors
ENSMUSG00000086324	7dpi	-0.667694		127.973	7.90694e-05	0.00212843	-3.9472	-3.0717	31.429	pseudobulk	DESeq2	LRT	glmGamPoi	scranSumFactors
Ranbp1	7dpi	-0.624376		715.535	7.94234e-05	0.00213524	-3.94613	-3.07075	31.3997	pseudobulk	DESeq2	LRT	glmGamPoi	scranSumFactors
Ppfia2	7dpi	0.405567		7114.75	7.95276e-05	0.00213532	3.94582	3.07074	31.3911	pseudobulk	DESeq2	LRT	glmGamPoi	scranSumFactors
ENSMUSG00000097090	7dpi	-0.566346		600.955	7.9684e-05	0.00213681	-3.94535	-3.07053	31.3782	pseudobulk	DESeq2	LRT	glmGamPoi	scranSumFactors
ENSMUSG00000104097	7dpi	-0.768707		136.31	7.98372e-05	0.0021382	-3.94489	-3.07033	31.3656	pseudobulk	DESeq2	LRT	glmGamPoi	scranSumFactors
4933413L06Rik	7dpi	-0.881517		228.217	7.99835e-05	0.00213941	-3.94445	-3.07016	31.3536	pseudobulk	DESeq2	LRT	glmGamPoi	scranSumFactors
Gng3	7dpi	-0.619703		1727.06	8.01962e-05	0.00214238	-3.94381	-3.06975	31.3362	pseudobulk	DESeq2	LRT	glmGamPoi	scranSumFactors
Cd320	7dpi	-0.660354		228.238	8.04239e-05	0.00214562	-3.94313	-3.0693	31.3176	pseudobulk	DESeq2	LRT	glmGamPoi	scranSumFactors
Wipi2	7dpi	0.350312		589.706	8.05203e-05	0.00214562	3.94285	3.0693	31.3098	pseudobulk	DESeq2	LRT	glmGamPoi	scranSumFactors
ENSMUSG00000083440	7dpi	-0.653101		761.382	8.08008e-05	0.00214924	-3.94201	-3.06879	31.287	pseudobulk	DESeq2	LRT	glmGamPoi	scranSumFactors
Cldnd1	7dpi	-0.517225		470.896	8.08598e-05	0.00214924	-3.94184	-3.06879	31.2823	pseudobulk	DESeq2	LRT	glmGamPoi	scranSumFactors
ENSMUSG00000097089	7dpi	-0.679968		106.162	8.12247e-05	0.00215623	-3.94076	-3.06782	31.2528	pseudobulk	DESeq2	LRT	glmGamPoi	scranSumFactors
Ercc6l2	7dpi	0.302559		729.318	8.19022e-05	0.00217149	3.93876	3.06572	31.1986	pseudobulk	DESeq2	LRT	glmGamPoi	scranSumFactors
1700024B05Rik	7dpi	-0.692768		166.2	8.29916e-05	0.00219761	-3.93559	-3.06214	31.1124	pseudobulk	DESeq2	LRT	glmGamPoi	scranSumFactors
Mrpl13	7dpi	-0.445779		311.499	8.34994e-05	0.00220829	-3.93413	-3.06069	31.0727	pseudobulk	DESeq2	LRT	glmGamPoi	scranSumFactors
Hif3a	7dpi	1.95749		361.971	8.38969e-05	0.00221428	3.93299	3.05988	31.0418	pseudobulk	DESeq2	LRT	glmGamPoi	scranSumFactors
Srp19	7dpi	-0.502324		578.273	8.39354e-05	0.00221428	-3.93288	-3.05988	31.0388	pseudobulk	DESeq2	LRT	glmGamPoi	scranSumFactors
Znhit1	7dpi	-0.607148		376.084	8.4253e-05	0.00221989	-3.93197	-3.05912	31.0142	pseudobulk	DESeq2	LRT	glmGamPoi	scranSumFactors
Rps24	7dpi	-0.513154		2387.48	8.44165e-05	0.00222142	-3.9315	-3.05891	31.0016	pseudobulk	DESeq2	LRT	glmGamPoi	scranSumFactors
H2aj	7dpi	-0.409366		736.205	8.47197e-05	0.00222458	-3.93064	-3.05849	30.9783	pseudobulk	DESeq2	LRT	glmGamPoi	scranSumFactors
ENSMUSG00000104053	7dpi	-0.734078		96.4853	8.47469e-05	0.00222458	-3.93056	-3.05849	30.9763	pseudobulk	DESeq2	LRT	glmGamPoi	scranSumFactors
Coq7	7dpi	-0.550935		280.391	8.50775e-05	0.00223009	-3.92963	-3.05775	30.951	pseudobulk	DESeq2	LRT	glmGamPoi	scranSumFactors
Polr3k	7dpi	-0.472292		231.698	8.52081e-05	0.00223009	-3.92926	-3.05775	30.941	pseudobulk	DESeq2	LRT	glmGamPoi	scranSumFactors
Ccdc85b	7dpi	-0.595283		677.271	8.53635e-05	0.00223009	-3.92882	-3.05775	30.9292	pseudobulk	DESeq2	LRT	glmGamPoi	scranSumFactors
Ralgapa2	7dpi	0.411082		2626.91	8.53908e-05	0.00223009	3.92874	3.05775	30.9271	pseudobulk	DESeq2	LRT	glmGamPoi	scranSumFactors
Orai1	7dpi	-0.53722		172.298	8.54843e-05	0.00223009	-3.92848	-3.05775	30.92	pseudobulk	DESeq2	LRT	glmGamPoi	scranSumFactors
Pfn2	7dpi	-0.557119		1193.09	8.57576e-05	0.00223345	-3.92771	-3.05729	30.8993	pseudobulk	DESeq2	LRT	glmGamPoi	scranSumFactors
Akap17b	7dpi	0.320528		585.723	8.58248e-05	0.00223345	3.92752	3.05729	30.8943	pseudobulk	DESeq2	LRT	glmGamPoi	scranSumFactors
Csnk2b	7dpi	-0.629624		359.629	8.65016e-05	0.0022483	-3.92563	-3.05531	30.8434	pseudobulk	DESeq2	LRT	glmGamPoi	scranSumFactors
Bhlhe41	7dpi	-0.431178		678.647	8.72663e-05	0.00226531	-3.92352	-3.05305	30.7864	pseudobulk	DESeq2	LRT	glmGamPoi	scranSumFactors
St13	7dpi	-0.477955		1406.1	8.73706e-05	0.00226531	-3.92323	-3.05305	30.7787	pseudobulk	DESeq2	LRT	glmGamPoi	scranSumFactors
Tm2d2	7dpi	-0.636671		657.604	8.75824e-05	0.00226802	-3.92264	-3.05269	30.7631	pseudobulk	DESeq2	LRT	glmGamPoi	scranSumFactors
Aldoa	7dpi	-0.632546		3894.32	8.77248e-05	0.00226893	-3.92225	-3.05257	30.7526	pseudobulk	DESeq2	LRT	glmGamPoi	scranSumFactors
Fam177a	7dpi	-0.443195		555.042	8.81746e-05	0.00227597	-3.92102	-3.05164	30.7195	pseudobulk	DESeq2	LRT	glmGamPoi	scranSumFactors
Zfhx4	7dpi	0.499598		2556.81	8.82125e-05	0.00227597	3.92092	3.05164	30.7168	pseudobulk	DESeq2	LRT	glmGamPoi	scranSumFactors
Iqch	7dpi	-0.630886		116.489	8.86098e-05	0.00228161	-3.91983	-3.05089	30.6878	pseudobulk	DESeq2	LRT	glmGamPoi	scranSumFactors
Rexo2	7dpi	-0.546515		438.371	8.8647e-05	0.00228161	-3.91973	-3.05089	30.6851	pseudobulk	DESeq2	LRT	glmGamPoi	scranSumFactors
Asf1a	7dpi	-0.544109		141.98	8.93914e-05	0.00229797	-3.91772	-3.04875	30.6312	pseudobulk	DESeq2	LRT	glmGamPoi	scranSumFactors
Jund	7dpi	-0.668869		1210.57	8.98544e-05	0.00230706	-3.91647	-3.04756	30.5979	pseudobulk	DESeq2	LRT	glmGamPoi	scranSumFactors
Ccdc80	7dpi	-0.869625		48.0644	9.01712e-05	0.00231239	-3.91562	-3.04687	30.5752	pseudobulk	DESeq2	LRT	glmGamPoi	scranSumFactors
A330076H08Rik	7dpi	0.306399		4783.53	9.08969e-05	0.00232817	3.91369	3.04482	30.5237	pseudobulk	DESeq2	LRT	glmGamPoi	scranSumFactors
Gm19951	7dpi	-1.0393		41.8162	9.10793e-05	0.00233002	-3.9132	-3.04458	30.5108	pseudobulk	DESeq2	LRT	glmGamPoi	scranSumFactors
Lsm6	7dpi	-0.539695		385.676	9.15405e-05	0.00233899	-3.91199	-3.04343	30.4784	pseudobulk	DESeq2	LRT	glmGamPoi	scranSumFactors
Sap18	7dpi	-0.661386		626.247	9.17927e-05	0.0023426	-3.91132	-3.04296	30.4607	pseudobulk	DESeq2	LRT	glmGamPoi	scranSumFactors
Ntrk3	7dpi	0.294042		4962.5	9.20274e-05	0.00234576	3.9107	3.04256	30.4444	pseudobulk	DESeq2	LRT	glmGamPoi	scranSumFactors
Alyref	7dpi	-0.640402		187.463	9.23773e-05	0.00235184	-3.90979	-3.04178	30.42	pseudobulk	DESeq2	LRT	glmGamPoi	scranSumFactors
Rheb	7dpi	-0.437637		1265.77	9.31744e-05	0.00236928	-3.90771	-3.03956	30.365	pseudobulk	DESeq2	LRT	glmGamPoi	scranSumFactors
Eef1e1	7dpi	-0.580505		282.41	9.33424e-05	0.00236981	-3.90728	-3.03949	30.3535	pseudobulk	DESeq2	LRT	glmGamPoi	scranSumFactors
Cfap54	7dpi	0.480996		686.406	9.3482e-05	0.00236981	3.90692	3.03949	30.3439	pseudobulk	DESeq2	LRT	glmGamPoi	scranSumFactors
Vps28	7dpi	-0.736087		753.332	9.35317e-05	0.00236981	-3.90679	-3.03949	30.3405	pseudobulk	DESeq2	LRT	glmGamPoi	scranSumFactors
Ifitm1	7dpi	-1.99225		33.547	9.37692e-05	0.00237298	-3.90617	-3.03909	30.3243	pseudobulk	DESeq2	LRT	glmGamPoi	scranSumFactors
Rps16	7dpi	-0.611794		1182.28	9.40523e-05	0.0023773	-3.90544	-3.03854	30.305	pseudobulk	DESeq2	LRT	glmGamPoi	scranSumFactors
Rpl18a	7dpi	-0.638616		1296.07	9.44929e-05	0.00238558	-3.90431	-3.03749	30.2751	pseudobulk	DESeq2	LRT	glmGamPoi	scranSumFactors
Tsc1	7dpi	0.320874		1342.62	9.58245e-05	0.00241002	3.90093	3.03442	30.1859	pseudobulk	DESeq2	LRT	glmGamPoi	scranSumFactors
Gm2087	7dpi	-0.838478		96.3837	9.59527e-05	0.00241002	-3.9006	-3.03442	30.1773	pseudobulk	DESeq2	LRT	glmGamPoi	scranSumFactors
Gstm5	7dpi	-0.702395		799.024	9.59559e-05	0.00241002	-3.9006	-3.03442	30.1771	pseudobulk	DESeq2	LRT	glmGamPoi	scranSumFactors
Rps7	7dpi	-0.581131		597.013	9.60269e-05	0.00241002	-3.90042	-3.03442	30.1724	pseudobulk	DESeq2	LRT	glmGamPoi	scranSumFactors
Syt14	7dpi	0.344117		1200.38	9.61049e-05	0.00241002	3.90022	3.03442	30.1672	pseudobulk	DESeq2	LRT	glmGamPoi	scranSumFactors
Cd59a	7dpi	-0.54419		395.709	9.61453e-05	0.00241002	-3.90012	-3.03442	30.1646	pseudobulk	DESeq2	LRT	glmGamPoi	scranSumFactors
Fcor	7dpi	-0.741861		82.2253	9.6417e-05	0.00241185	-3.89944	-3.03419	30.1466	pseudobulk	DESeq2	LRT	glmGamPoi	scranSumFactors
Eif4a1	7dpi	-0.582578		895.692	9.64465e-05	0.00241185	-3.89936	-3.03419	30.1446	pseudobulk	DESeq2	LRT	glmGamPoi	scranSumFactors
Gjb1	7dpi	-0.865167		182.18	9.68171e-05	0.00241825	-3.89843	-3.03339	30.1202	pseudobulk	DESeq2	LRT	glmGamPoi	scranSumFactors
Gm38691	7dpi	-0.794601		58.8304	9.7112e-05	0.00242242	-3.8977	-3.03287	30.1009	pseudobulk	DESeq2	LRT	glmGamPoi	scranSumFactors
Rps9	7dpi	-0.613728		1276.44	9.7213e-05	0.00242242	-3.89744	-3.03287	30.0943	pseudobulk	DESeq2	LRT	glmGamPoi	scranSumFactors
Tspyl5	7dpi	-0.583122		230.743	9.73559e-05	0.00242307	-3.89709	-3.03279	30.0849	pseudobulk	DESeq2	LRT	glmGamPoi	scranSumFactors
Guk1	7dpi	-0.549044		645.159	9.74686e-05	0.00242307	-3.89681	-3.03279	30.0776	pseudobulk	DESeq2	LRT	glmGamPoi	scranSumFactors
B230303A05Rik	7dpi	0.349643		5679.74	9.87076e-05	0.0024482	3.89375	3.02967	29.9973	pseudobulk	DESeq2	LRT	glmGamPoi	scranSumFactors
ENSMUSG00000107525	7dpi	-0.935969		63.7806	9.8735e-05	0.0024482	-3.89368	-3.02967	29.9956	pseudobulk	DESeq2	LRT	glmGamPoi	scranSumFactors
Spata5	7dpi	0.282206		920.963	9.89684e-05	0.0024482	3.89311	3.02967	29.9806	pseudobulk	DESeq2	LRT	glmGamPoi	scranSumFactors
Kxd1	7dpi	-0.545462		1466.17	9.91843e-05	0.0024482	-3.89258	-3.02967	29.9668	pseudobulk	DESeq2	LRT	glmGamPoi	scranSumFactors
Ctsl	7dpi	-0.620343		1191.99	9.92075e-05	0.0024482	-3.89252	-3.02967	29.9653	pseudobulk	DESeq2	LRT	glmGamPoi	scranSumFactors
Mpst	7dpi	-0.833211		80.1799	9.92359e-05	0.0024482	-3.89245	-3.02967	29.9635	pseudobulk	DESeq2	LRT	glmGamPoi	scranSumFactors
Ift22	7dpi	-0.606801		328.836	9.92906e-05	0.0024482	-3.89232	-3.02967	29.96	pseudobulk	DESeq2	LRT	glmGamPoi	scranSumFactors
Kcnq1	7dpi	-0.440127		1278.26	9.98248e-05	0.00245157	-3.89102	-3.02926	29.926	pseudobulk	DESeq2	LRT	glmGamPoi	scranSumFactors
Unc79	7dpi	0.279422		3470.85	9.98436e-05	0.00245157	3.89097	3.02926	29.9248	pseudobulk	DESeq2	LRT	glmGamPoi	scranSumFactors
Akirin1	7dpi	-0.390127		455.741	9.98708e-05	0.00245157	-3.89091	-3.02926	29.9231	pseudobulk	DESeq2	LRT	glmGamPoi	scranSumFactors
Mrpl46	7dpi	-0.659472		190.041	9.98914e-05	0.00245157	-3.89086	-3.02926	29.9218	pseudobulk	DESeq2	LRT	glmGamPoi	scranSumFactors
Cd59b	7dpi	-0.645853		152.323	0.00010001	0.00245163	-3.89057	-3.02925	29.9143	pseudobulk	DESeq2	LRT	glmGamPoi	scranSumFactors
Commd8	7dpi	-0.637693		173.093	0.000100903	0.00247002	-3.88841	-3.02699	29.858	pseudobulk	DESeq2	LRT	glmGamPoi	scranSumFactors
Mrpl32	7dpi	-0.653832		378.945	0.000101021	0.00247002	-3.88813	-3.02699	29.8506	pseudobulk	DESeq2	LRT	glmGamPoi	scranSumFactors
S100a13	7dpi	-0.812114		197.361	0.00010111	0.00247002	-3.88791	-3.02699	29.845	pseudobulk	DESeq2	LRT	glmGamPoi	scranSumFactors
1700016K05Rik	7dpi	-0.915025		54.1137	0.000101895	0.00248631	-3.88603	-3.025	29.7962	pseudobulk	DESeq2	LRT	glmGamPoi	scranSumFactors
Tst	7dpi	-1.23847		132.287	0.000102105	0.00248663	-3.88554	-3.02496	29.7832	pseudobulk	DESeq2	LRT	glmGamPoi	scranSumFactors
Tbca	7dpi	-0.463329		983.135	0.000102144	0.00248663	-3.88544	-3.02496	29.7808	pseudobulk	DESeq2	LRT	glmGamPoi	scranSumFactors
E130102H24Rik	7dpi	-0.335383		451.713	0.000102878	0.00250162	-3.8837	-3.02314	29.7356	pseudobulk	DESeq2	LRT	glmGamPoi	scranSumFactors
Mrps31	7dpi	-0.640743		286.281	0.000103219	0.00250447	-3.8829	-3.0228	29.7147	pseudobulk	DESeq2	LRT	glmGamPoi	scranSumFactors
Smim12	7dpi	-0.496976		355.891	0.000103232	0.00250447	-3.88287	-3.0228	29.7139	pseudobulk	DESeq2	LRT	glmGamPoi	scranSumFactors
Ifitm3	7dpi	-1.57456		70.7435	0.000104141	0.00252103	-3.88074	-3.02081	29.6587	pseudobulk	DESeq2	LRT	glmGamPoi	scranSumFactors
Eps8l2	7dpi	-1.2253		35.5243	0.000104153	0.00252103	-3.88071	-3.02081	29.658	pseudobulk	DESeq2	LRT	glmGamPoi	scranSumFactors
Chd2	7dpi	0.249864		2536.68	0.000104728	0.00253204	3.87937	3.01949	29.6234	pseudobulk	DESeq2	LRT	glmGamPoi	scranSumFactors
Gemin7	7dpi	-0.623202		215.88	0.000105009	0.00253593	-3.87872	-3.01902	29.6065	pseudobulk	DESeq2	LRT	glmGamPoi	scranSumFactors
Glrx5	7dpi	-0.553374		403.478	0.00010524	0.00253861	-3.87818	-3.0187	29.5927	pseudobulk	DESeq2	LRT	glmGamPoi	scranSumFactors
1700080N15Rik	7dpi	-0.53481		171.139	0.000106542	0.00256708	-3.87519	-3.01532	29.5155	pseudobulk	DESeq2	LRT	glmGamPoi	scranSumFactors
Sdhaf4	7dpi	-0.66723		268.567	0.000107117	0.00257612	-3.87388	-3.01425	29.4818	pseudobulk	DESeq2	LRT	glmGamPoi	scranSumFactors
Ypel3	7dpi	-0.453561		1540.35	0.000107161	0.00257612	-3.87378	-3.01425	29.4792	pseudobulk	DESeq2	LRT	glmGamPoi	scranSumFactors
ENSMUSG00000110532	7dpi	-0.929731		69.9199	0.000107377	0.0025784	-3.87329	-3.01399	29.4665	pseudobulk	DESeq2	LRT	glmGamPoi	scranSumFactors
Mecom	7dpi	-1.19468		83.6535	0.000107677	0.00258267	-3.87261	-3.01348	29.4491	pseudobulk	DESeq2	LRT	glmGamPoi	scranSumFactors
4930557K07Rik	7dpi	-0.4862		249.359	0.000108386	0.00259164	-3.87101	-3.01243	29.408	pseudobulk	DESeq2	LRT	glmGamPoi	scranSumFactors
Lrrc4	7dpi	-0.337004		674.776	0.000108517	0.00259164	-3.87071	-3.01243	29.4005	pseudobulk	DESeq2	LRT	glmGamPoi	scranSumFactors
Glp2r	7dpi	-0.554376		689.079	0.000108555	0.00259164	-3.87063	-3.01243	29.3983	pseudobulk	DESeq2	LRT	glmGamPoi	scranSumFactors
Grid1	7dpi	0.348443		6511.38	0.000108664	0.00259164	3.87038	3.01243	29.392	pseudobulk	DESeq2	LRT	glmGamPoi	scranSumFactors
Ell	7dpi	0.365766		422.608	0.000108665	0.00259164	3.87038	3.01243	29.392	pseudobulk	DESeq2	LRT	glmGamPoi	scranSumFactors
Gm14172	7dpi	-0.592321		232.279	0.000109331	0.00260347	-3.86889	-3.01105	29.3537	pseudobulk	DESeq2	LRT	glmGamPoi	scranSumFactors
Kynu	7dpi	-0.790309		57.8478	0.000109407	0.00260347	-3.86872	-3.01105	29.3494	pseudobulk	DESeq2	LRT	glmGamPoi	scranSumFactors
ENSMUSG00000101872	7dpi	-0.734656		67.9683	0.000109978	0.00261411	-3.86745	-3.00981	29.3169	pseudobulk	DESeq2	LRT	glmGamPoi	scranSumFactors
Ppp2r3c	7dpi	-0.392032		291.802	0.000110559	0.00262498	-3.86617	-3.00855	29.284	pseudobulk	DESeq2	LRT	glmGamPoi	scranSumFactors
Pax6os1	7dpi	-0.659459		190.882	0.000111403	0.00264204	-3.86431	-3.00658	29.2366	pseudobulk	DESeq2	LRT	glmGamPoi	scranSumFactors
Cdkn2d	7dpi	-0.649403		284.547	0.000111876	0.00265028	-3.86328	-3.00563	29.2102	pseudobulk	DESeq2	LRT	glmGamPoi	scranSumFactors
ENSMUSG00000085792	7dpi	-0.695158		75.4389	0.000112164	0.00265349	-3.86265	-3.00527	29.1942	pseudobulk	DESeq2	LRT	glmGamPoi	scranSumFactors
H2-K1	7dpi	-0.488708		216.224	0.000112262	0.00265349	-3.86244	-3.00527	29.1888	pseudobulk	DESeq2	LRT	glmGamPoi	scranSumFactors
2610203C22Rik	7dpi	-1.21113		52.2849	0.00011274	0.0026618	-3.8614	-3.00431	29.1624	pseudobulk	DESeq2	LRT	glmGamPoi	scranSumFactors
Bcas3os1	7dpi	-0.422263		279.023	0.000113101	0.00266734	-3.86062	-3.00368	29.1425	pseudobulk	DESeq2	LRT	glmGamPoi	scranSumFactors
Ndufa10	7dpi	-0.407432		893.13	0.000113735	0.00267664	-3.85925	-3.00262	29.1078	pseudobulk	DESeq2	LRT	glmGamPoi	scranSumFactors
Rfk	7dpi	-0.543117		132.338	0.000113748	0.00267664	-3.85922	-3.00262	29.107	pseudobulk	DESeq2	LRT	glmGamPoi	scranSumFactors
Brip1os	7dpi	-0.468156		598.595	0.000114024	0.00268012	-3.85863	-3.00223	29.092	pseudobulk	DESeq2	LRT	glmGamPoi	scranSumFactors
Psmc2	7dpi	-0.492912		612.679	0.000114259	0.00268268	-3.85813	-3.00194	29.0792	pseudobulk	DESeq2	LRT	glmGamPoi	scranSumFactors
Astn1	7dpi	0.296459		4111.57	0.000114629	0.00268821	3.85734	3.00131	29.0592	pseudobulk	DESeq2	LRT	glmGamPoi	scranSumFactors
Ube2a	7dpi	-0.419598		241.397	0.000114749	0.00268821	-3.85708	-3.00131	29.0527	pseudobulk	DESeq2	LRT	glmGamPoi	scranSumFactors
ENSMUSG00000114696	7dpi	-0.744425		65.6918	0.000115083	0.00269305	-3.85637	-3.00076	29.0347	pseudobulk	DESeq2	LRT	glmGamPoi	scranSumFactors
Gm14305	7dpi	-0.57503		203.607	0.000115282	0.00269471	-3.85595	-3.00057	29.024	pseudobulk	DESeq2	LRT	glmGamPoi	scranSumFactors
Nxt1	7dpi	-0.652049		135.755	0.000115669	0.00270078	-3.85513	-2.99989	29.0032	pseudobulk	DESeq2	LRT	glmGamPoi	scranSumFactors
Hmgcs1	7dpi	-0.530233		780.78	0.000115954	0.00270444	-3.85453	-2.99948	28.988	pseudobulk	DESeq2	LRT	glmGamPoi	scranSumFactors
Anxa5	7dpi	-0.634683		242.467	0.000116197	0.00270638	-3.85401	-2.99926	28.975	pseudobulk	DESeq2	LRT	glmGamPoi	scranSumFactors
Bex2	7dpi	-0.775633		2404.44	0.000116293	0.00270638	-3.85381	-2.99926	28.9699	pseudobulk	DESeq2	LRT	glmGamPoi	scranSumFactors
A230057D06Rik	7dpi	0.27692		10915.9	0.000116512	0.00270679	3.85335	2.99921	28.9582	pseudobulk	DESeq2	LRT	glmGamPoi	scranSumFactors
Thsd7b	7dpi	0.362642		3462.22	0.000116567	0.00270679	3.85324	2.99921	28.9553	pseudobulk	DESeq2	LRT	glmGamPoi	scranSumFactors
Rbm15	7dpi	-0.428292		225.724	0.000117443	0.00271706	-3.8514	-2.99806	28.909	pseudobulk	DESeq2	LRT	glmGamPoi	scranSumFactors
Avpi1	7dpi	-0.641609		109.269	0.000117449	0.00271706	-3.85139	-2.99806	28.9087	pseudobulk	DESeq2	LRT	glmGamPoi	scranSumFactors
B430010I23Rik	7dpi	-0.519119		263.155	0.000117494	0.00271706	-3.8513	-2.99806	28.9063	pseudobulk	DESeq2	LRT	glmGamPoi	scranSumFactors
Lhfpl4	7dpi	0.328225		602.317	0.000117524	0.00271706	3.85124	2.99806	28.9048	pseudobulk	DESeq2	LRT	glmGamPoi	scranSumFactors
Angpt2	7dpi	-0.648364		134.11	0.000117901	0.00271913	-3.85045	-2.99783	28.885	pseudobulk	DESeq2	LRT	glmGamPoi	scranSumFactors
Med29	7dpi	-0.768771		123.877	0.000118079	0.00271913	-3.85008	-2.99783	28.8757	pseudobulk	DESeq2	LRT	glmGamPoi	scranSumFactors
Gpx8	7dpi	-1.04014		30.0523	0.000118185	0.00271913	-3.84986	-2.99783	28.8701	pseudobulk	DESeq2	LRT	glmGamPoi	scranSumFactors
Rbmxl1	7dpi	-0.539549		328.259	0.000118299	0.00271913	-3.84962	-2.99783	28.8642	pseudobulk	DESeq2	LRT	glmGamPoi	scranSumFactors
Scp2	7dpi	-0.361274		352.325	0.000118346	0.00271913	-3.84953	-2.99783	28.8617	pseudobulk	DESeq2	LRT	glmGamPoi	scranSumFactors
Golga7	7dpi	-0.420872		424.004	0.000118385	0.00271913	-3.84945	-2.99783	28.8597	pseudobulk	DESeq2	LRT	glmGamPoi	scranSumFactors
Gabarapl1	7dpi	-0.509138		779.032	0.000118721	0.00272218	-3.84875	-2.99748	28.8422	pseudobulk	DESeq2	LRT	glmGamPoi	scranSumFactors
Dscam	7dpi	0.315841		10998.5	0.000118776	0.00272218	3.84864	2.99748	28.8394	pseudobulk	DESeq2	LRT	glmGamPoi	scranSumFactors
Pfdn5	7dpi	-0.492004		1095.92	0.000119173	0.00272768	-3.84782	-2.99687	28.8188	pseudobulk	DESeq2	LRT	glmGamPoi	scranSumFactors
Rdh14	7dpi	-0.520833		333.759	0.000119274	0.00272768	-3.84761	-2.99687	28.8135	pseudobulk	DESeq2	LRT	glmGamPoi	scranSumFactors
ENSMUSG00000108112	7dpi	-0.351977		384.068	0.000119718	0.00273489	-3.8467	-2.99606	28.7906	pseudobulk	DESeq2	LRT	glmGamPoi	scranSumFactors
Yif1a	7dpi	-0.577042		181.607	0.000120243	0.00274109	-3.84563	-2.99537	28.7637	pseudobulk	DESeq2	LRT	glmGamPoi	scranSumFactors
Rpl6	7dpi	-0.647404		1904.48	0.000120275	0.00274109	-3.84556	-2.99537	28.762	pseudobulk	DESeq2	LRT	glmGamPoi	scranSumFactors
Cd302	7dpi	-0.618377		240.267	0.000120379	0.00274109	-3.84535	-2.99537	28.7567	pseudobulk	DESeq2	LRT	glmGamPoi	scranSumFactors
Myl9	7dpi	-1.64781		19.8888	0.000120732	0.00274617	-3.84463	-2.99481	28.7387	pseudobulk	DESeq2	LRT	glmGamPoi	scranSumFactors
Ints6l	7dpi	0.378617		1035.19	0.000121533	0.0027614	3.84301	2.99312	28.6981	pseudobulk	DESeq2	LRT	glmGamPoi	scranSumFactors
Txndc9	7dpi	-0.514359		424.833	0.000123023	0.00278966	-3.84002	-2.99001	28.6232	pseudobulk	DESeq2	LRT	glmGamPoi	scranSumFactors
Cggbp1	7dpi	-0.537363		313.12	0.00012304	0.00278966	-3.83999	-2.99001	28.6223	pseudobulk	DESeq2	LRT	glmGamPoi	scranSumFactors
Psmd6	7dpi	-0.476127		471.93	0.000123676	0.00280108	-3.83872	-2.98876	28.5907	pseudobulk	DESeq2	LRT	glmGamPoi	scranSumFactors
Mir703	7dpi	-0.900828		112.602	0.00012473	0.00282192	-3.83664	-2.9865	28.5387	pseudobulk	DESeq2	LRT	glmGamPoi	scranSumFactors
Sorcs3	7dpi	0.376007		3956.12	0.000124874	0.00282214	3.83636	2.98647	28.5317	pseudobulk	DESeq2	LRT	glmGamPoi	scranSumFactors
Rpl35a	7dpi	-0.586511		1774.61	0.000125593	0.00283362	-3.83494	-2.98523	28.4965	pseudobulk	DESeq2	LRT	glmGamPoi	scranSumFactors
A330023F24Rik	7dpi	0.252389		3567.36	0.000125649	0.00283362	3.83483	2.98523	28.4938	pseudobulk	DESeq2	LRT	glmGamPoi	scranSumFactors
D030024E09Rik	7dpi	-0.684767		98.3586	0.000126278	0.00284173	-3.83361	-2.98436	28.4633	pseudobulk	DESeq2	LRT	glmGamPoi	scranSumFactors
Them4	7dpi	-0.387247		309.012	0.000126278	0.00284173	-3.83361	-2.98436	28.4633	pseudobulk	DESeq2	LRT	glmGamPoi	scranSumFactors
ENSMUSG00000118291	7dpi	-0.816988		69.3798	0.000126897	0.00285262	-3.8324	-2.98319	28.4334	pseudobulk	DESeq2	LRT	glmGamPoi	scranSumFactors
Tubb4b	7dpi	-0.746622		1218.53	0.00012739	0.00285896	-3.83145	-2.98251	28.4097	pseudobulk	DESeq2	LRT	glmGamPoi	scranSumFactors
ENSMUSG00000085709	7dpi	-0.93506		112.49	0.000127516	0.00285896	-3.83121	-2.98251	28.4037	pseudobulk	DESeq2	LRT	glmGamPoi	scranSumFactors
Rps19bp1	7dpi	-0.663467		162.89	0.000127585	0.00285896	-3.83107	-2.98251	28.4004	pseudobulk	DESeq2	LRT	glmGamPoi	scranSumFactors
Pfdn6	7dpi	-0.567203		427.023	0.000128213	0.00287	-3.82987	-2.98133	28.3704	pseudobulk	DESeq2	LRT	glmGamPoi	scranSumFactors
ENSMUSG00000086681	7dpi	-0.650609		82.3772	0.000128748	0.00287892	-3.82884	-2.98038	28.345	pseudobulk	DESeq2	LRT	glmGamPoi	scranSumFactors
Pmp22	7dpi	-0.943083		236.322	0.000129195	0.00288586	-3.82799	-2.97964	28.3239	pseudobulk	DESeq2	LRT	glmGamPoi	scranSumFactors
Lamtor2	7dpi	-0.608981		827.924	0.00012944	0.00288827	-3.82752	-2.97939	28.3124	pseudobulk	DESeq2	LRT	glmGamPoi	scranSumFactors
Rps5	7dpi	-0.618009		1433.64	0.00012962	0.00288924	-3.82718	-2.97928	28.3039	pseudobulk	DESeq2	LRT	glmGamPoi	scranSumFactors
Cdkn1a	7dpi	2.60655		117.871	0.00012989	0.0028922	3.82667	2.97897	28.2913	pseudobulk	DESeq2	LRT	glmGamPoi	scranSumFactors
Actr2	7dpi	-0.240603		1450.57	0.000130434	0.00290127	-3.82564	-2.97801	28.2658	pseudobulk	DESeq2	LRT	glmGamPoi	scranSumFactors
Metrn	7dpi	-0.722862		86.5756	0.000130899	0.00290855	-3.82476	-2.97724	28.2442	pseudobulk	DESeq2	LRT	glmGamPoi	scranSumFactors
Ly86	7dpi	-1.45798		67.9706	0.000131492	0.00291865	-3.82365	-2.97618	28.2168	pseudobulk	DESeq2	LRT	glmGamPoi	scranSumFactors
Lrrc4c	7dpi	0.29338		29894.2	0.000132175	0.00293074	3.82237	2.97491	28.1853	pseudobulk	DESeq2	LRT	glmGamPoi	scranSumFactors
Dennd6b	7dpi	0.396359		719.389	0.000132359	0.00293175	3.82203	2.97481	28.1768	pseudobulk	DESeq2	LRT	glmGamPoi	scranSumFactors
Tctex1d2	7dpi	-0.468159		293.175	0.000132537	0.0029326	-3.8217	-2.97472	28.1687	pseudobulk	DESeq2	LRT	glmGamPoi	scranSumFactors
Hnrnpu	7dpi	0.299278		3244.4	0.0001331	0.0029384	3.82065	2.97411	28.143	pseudobulk	DESeq2	LRT	glmGamPoi	scranSumFactors
Grpel1	7dpi	-0.695657		329.306	0.000133101	0.0029384	-3.82065	-2.97411	28.1429	pseudobulk	DESeq2	LRT	glmGamPoi	scranSumFactors
Lmbr1	7dpi	0.320655		1462.25	0.000133216	0.0029384	3.82044	2.97411	28.1377	pseudobulk	DESeq2	LRT	glmGamPoi	scranSumFactors
Rpl10	7dpi	-0.824383		412.418	0.000133683	0.00294252	-3.81957	-2.97368	28.1165	pseudobulk	DESeq2	LRT	glmGamPoi	scranSumFactors
ENSMUSG00000114934	7dpi	-1.38782		16.8982	0.000133684	0.00294252	-3.81957	-2.97368	28.1164	pseudobulk	DESeq2	LRT	glmGamPoi	scranSumFactors
Ap2s1	7dpi	-0.514861		622.529	0.000133821	0.00294252	-3.81932	-2.97368	28.1103	pseudobulk	DESeq2	LRT	glmGamPoi	scranSumFactors
ENSMUSG00000111910	7dpi	-0.959583		49.1774	0.000135117	0.00296795	-3.81694	-2.97104	28.0519	pseudobulk	DESeq2	LRT	glmGamPoi	scranSumFactors
H1f10	7dpi	-0.691375		229.333	0.000135785	0.00297952	-3.81572	-2.96984	28.0221	pseudobulk	DESeq2	LRT	glmGamPoi	scranSumFactors
Serbp1	7dpi	-0.378387		1127.82	0.00013622	0.00298597	-3.81493	-2.96918	28.0027	pseudobulk	DESeq2	LRT	glmGamPoi	scranSumFactors
ENSMUSG00000107478	7dpi	-0.428173		689.4	0.000136915	0.00299807	-3.81368	-2.96794	27.972	pseudobulk	DESeq2	LRT	glmGamPoi	scranSumFactors
Serpinb1a	7dpi	-1.51296		226.483	0.00013781	0.00301455	-3.81207	-2.96625	27.9327	pseudobulk	DESeq2	LRT	glmGamPoi	scranSumFactors
Shprh	7dpi	0.264989		1212.12	0.000138814	0.00303339	3.81027	2.96433	27.8889	pseudobulk	DESeq2	LRT	glmGamPoi	scranSumFactors
Mrpl33	7dpi	-0.544195		340.607	0.000139718	0.00304732	-3.80867	-2.96292	27.8499	pseudobulk	DESeq2	LRT	glmGamPoi	scranSumFactors
Atg101	7dpi	-0.614531		165.16	0.00013974	0.00304732	-3.80863	-2.96292	27.8489	pseudobulk	DESeq2	LRT	glmGamPoi	scranSumFactors
Wnt6	7dpi	-2.03644		21.6769	0.000139949	0.00304872	-3.80826	-2.96278	27.8399	pseudobulk	DESeq2	LRT	glmGamPoi	scranSumFactors
Set	7dpi	-0.62778		1052.13	0.000141039	0.00306932	-3.80634	-2.96071	27.7932	pseudobulk	DESeq2	LRT	glmGamPoi	scranSumFactors
Slc2a3	7dpi	0.337208		991.506	0.000141591	0.00307566	3.80537	2.96007	27.7698	pseudobulk	DESeq2	LRT	glmGamPoi	scranSumFactors
Dgcr6	7dpi	-0.427981		378.929	0.000141622	0.00307566	-3.80532	-2.96007	27.7685	pseudobulk	DESeq2	LRT	glmGamPoi	scranSumFactors
Vmn2r1	7dpi	0.993685		58.8007	0.000141813	0.00307663	3.80499	2.95998	27.7604	pseudobulk	DESeq2	LRT	glmGamPoi	scranSumFactors
Srp9	7dpi	-0.490091		629.482	0.000142893	0.0030969	-3.80311	-2.95795	27.7148	pseudobulk	DESeq2	LRT	glmGamPoi	scranSumFactors
Hmgcll1	7dpi	0.259112		1834.21	0.000143204	0.00309953	3.80257	2.95769	27.7018	pseudobulk	DESeq2	LRT	glmGamPoi	scranSumFactors
Brd8dc	7dpi	0.594232		123.655	0.000143308	0.00309953	3.80239	2.95769	27.6975	pseudobulk	DESeq2	LRT	glmGamPoi	scranSumFactors
Nr1d1	7dpi	-0.577923		203.845	0.000143725	0.00310538	-3.80167	-2.95711	27.68	pseudobulk	DESeq2	LRT	glmGamPoi	scranSumFactors
Cct5	7dpi	-0.632664		532.586	0.000144456	0.00311098	-3.80041	-2.95655	27.6497	pseudobulk	DESeq2	LRT	glmGamPoi	scranSumFactors
Fau	7dpi	-0.640799		2855.14	0.00014446	0.00311098	-3.8004	-2.95655	27.6495	pseudobulk	DESeq2	LRT	glmGamPoi	scranSumFactors
Nhp2	7dpi	-0.671923		133.108	0.000144518	0.00311098	-3.80031	-2.95655	27.6471	pseudobulk	DESeq2	LRT	glmGamPoi	scranSumFactors
Cd81	7dpi	-0.569743		5082.3	0.000144617	0.00311098	-3.80014	-2.95655	27.643	pseudobulk	DESeq2	LRT	glmGamPoi	scranSumFactors
Dohh	7dpi	-0.600689		141.88	0.000144721	0.00311098	-3.79996	-2.95655	27.6387	pseudobulk	DESeq2	LRT	glmGamPoi	scranSumFactors
Ccser1	7dpi	0.251875		15475.8	0.000144974	0.00311155	3.79953	2.9565	27.6282	pseudobulk	DESeq2	LRT	glmGamPoi	scranSumFactors
Pmepa1	7dpi	-0.466162		534.69	0.000145087	0.00311155	-3.79933	-2.9565	27.6236	pseudobulk	DESeq2	LRT	glmGamPoi	scranSumFactors
Tmem60	7dpi	-0.605957		455.196	0.000145189	0.00311155	-3.79916	-2.9565	27.6194	pseudobulk	DESeq2	LRT	glmGamPoi	scranSumFactors
Rpp25l	7dpi	-0.698184		163.583	0.00014546	0.00311419	-3.7987	-2.95624	27.6082	pseudobulk	DESeq2	LRT	glmGamPoi	scranSumFactors
Mrpl28	7dpi	-0.646026		298.074	0.00014596	0.00312105	-3.79784	-2.95556	27.5877	pseudobulk	DESeq2	LRT	glmGamPoi	scranSumFactors
Nans	7dpi	-0.783628		72.8921	0.000146075	0.00312105	-3.79765	-2.95556	27.583	pseudobulk	DESeq2	LRT	glmGamPoi	scranSumFactors
Slit1	7dpi	0.354714		768.566	0.000147158	0.00314046	3.79582	2.95364	27.5388	pseudobulk	DESeq2	LRT	glmGamPoi	scranSumFactors
ENSMUSG00000096936	7dpi	0.781288		193.007	0.000147639	0.00314046	3.79501	2.95364	27.5194	pseudobulk	DESeq2	LRT	glmGamPoi	scranSumFactors
ENSMUSG00000097060	7dpi	-0.776526		55.4558	0.000148123	0.00314046	-3.79419	-2.95364	27.4998	pseudobulk	DESeq2	LRT	glmGamPoi	scranSumFactors
Aimp2	7dpi	-0.569048		144.463	0.000148133	0.00314046	-3.79418	-2.95364	27.4994	pseudobulk	DESeq2	LRT	glmGamPoi	scranSumFactors
Rptor	7dpi	0.265575		1695.54	0.000148337	0.00314046	3.79384	2.95364	27.4912	pseudobulk	DESeq2	LRT	glmGamPoi	scranSumFactors
Nav1	7dpi	0.291235		3014.87	0.000148366	0.00314046	3.79379	2.95364	27.4901	pseudobulk	DESeq2	LRT	glmGamPoi	scranSumFactors
Gm20616	7dpi	-0.571769		118.115	0.000148375	0.00314046	-3.79377	-2.95364	27.4897	pseudobulk	DESeq2	LRT	glmGamPoi	scranSumFactors
Ube2v2	7dpi	-0.431734		1118.9	0.000148414	0.00314046	-3.79371	-2.95364	27.4881	pseudobulk	DESeq2	LRT	glmGamPoi	scranSumFactors
Taf11	7dpi	-0.491587		346.732	0.000148421	0.00314046	-3.7937	-2.95364	27.4879	pseudobulk	DESeq2	LRT	glmGamPoi	scranSumFactors
Med21	7dpi	-0.567503		380.084	0.000148809	0.00314046	-3.79305	-2.95364	27.4723	pseudobulk	DESeq2	LRT	glmGamPoi	scranSumFactors
Psmc5	7dpi	-0.560737		858.946	0.000148812	0.00314046	-3.79304	-2.95364	27.4722	pseudobulk	DESeq2	LRT	glmGamPoi	scranSumFactors
Mapk10	7dpi	0.282917		5604.26	0.000149025	0.00314046	3.79269	2.95364	27.4636	pseudobulk	DESeq2	LRT	glmGamPoi	scranSumFactors
Abr	7dpi	0.255827		2954.13	0.000149064	0.00314046	3.79262	2.95364	27.4621	pseudobulk	DESeq2	LRT	glmGamPoi	scranSumFactors
Cmtm8	7dpi	-1.28828		19.1505	0.000149135	0.00314046	-3.79251	-2.95364	27.4592	pseudobulk	DESeq2	LRT	glmGamPoi	scranSumFactors
ENSMUSG00000104206	7dpi	-0.496961		522.525	0.000149655	0.00314046	-3.79164	-2.95364	27.4385	pseudobulk	DESeq2	LRT	glmGamPoi	scranSumFactors
ENSMUSG00000046958	7dpi	-2.01894		21.083	0.000149681	0.00314046	-3.7916	-2.95364	27.4375	pseudobulk	DESeq2	LRT	glmGamPoi	scranSumFactors
Dynlt3	7dpi	-0.430847		375.262	0.000149706	0.00314046	-3.79156	-2.95364	27.4365	pseudobulk	DESeq2	LRT	glmGamPoi	scranSumFactors
ENSMUSG00000110007	7dpi	-0.751276		59.9478	0.000149748	0.00314046	-3.79149	-2.95364	27.4348	pseudobulk	DESeq2	LRT	glmGamPoi	scranSumFactors
Glod4	7dpi	-0.278868		1187.3	0.000149808	0.00314046	-3.79139	-2.95364	27.4324	pseudobulk	DESeq2	LRT	glmGamPoi	scranSumFactors
Ccdc167	7dpi	-0.44882		193.174	0.000150489	0.00315162	-3.79026	-2.95255	27.4054	pseudobulk	DESeq2	LRT	glmGamPoi	scranSumFactors
Micos13	7dpi	-0.687546		709.734	0.000151611	0.00317197	-3.78842	-2.95056	27.3612	pseudobulk	DESeq2	LRT	glmGamPoi	scranSumFactors
Tubb5	7dpi	-0.678067		1472.14	0.000152537	0.00318819	-3.7869	-2.94899	27.3251	pseudobulk	DESeq2	LRT	glmGamPoi	scranSumFactors
Grp	7dpi	-0.712894		88.9344	0.000153386	0.00320276	-3.78552	-2.94758	27.2921	pseudobulk	DESeq2	LRT	glmGamPoi	scranSumFactors
Sim1	7dpi	0.610254		484.679	0.000153565	0.00320334	3.78523	2.94752	27.2852	pseudobulk	DESeq2	LRT	glmGamPoi	scranSumFactors
Leprot	7dpi	-0.48281		180.085	0.000153788	0.00320483	-3.78487	-2.94738	27.2766	pseudobulk	DESeq2	LRT	glmGamPoi	scranSumFactors
2810001G20Rik	7dpi	-0.481643		261.714	0.000154115	0.00320848	-3.78434	-2.94702	27.264	pseudobulk	DESeq2	LRT	glmGamPoi	scranSumFactors
Asic2	7dpi	0.390504		18461.1	0.000154339	0.00320997	3.78398	2.94688	27.2554	pseudobulk	DESeq2	LRT	glmGamPoi	scranSumFactors
Cntnap5b	7dpi	0.444179		4572.68	0.000154857	0.00321758	3.78315	2.94615	27.2355	pseudobulk	DESeq2	LRT	glmGamPoi	scranSumFactors
ENSMUSG00000104784	7dpi	-0.5155		239.66	0.000157141	0.00326184	-3.7795	-2.94192	27.1489	pseudobulk	DESeq2	LRT	glmGamPoi	scranSumFactors
Rpl19	7dpi	-0.672829		2722.63	0.000157297	0.00326187	-3.77926	-2.94192	27.143	pseudobulk	DESeq2	LRT	glmGamPoi	scranSumFactors
Med28	7dpi	-0.678624		350.096	0.000157892	0.00327099	-3.77832	-2.94105	27.1207	pseudobulk	DESeq2	LRT	glmGamPoi	scranSumFactors
ENSMUSG00000102784	7dpi	-0.445242		218.694	0.000159587	0.00330287	-3.77566	-2.93805	27.0577	pseudobulk	DESeq2	LRT	glmGamPoi	scranSumFactors
Tmem176b	7dpi	-0.920323		349.127	0.000160295	0.00331428	-3.77455	-2.93698	27.0316	pseudobulk	DESeq2	LRT	glmGamPoi	scranSumFactors
Gm10684	7dpi	-0.778947		841.751	0.000161411	0.00333408	-3.77282	-2.93513	26.9907	pseudobulk	DESeq2	LRT	glmGamPoi	scranSumFactors
Csmd3	7dpi	0.23562		21740.1	0.000161842	0.00333974	3.77216	2.9346	26.975	pseudobulk	DESeq2	LRT	glmGamPoi	scranSumFactors
Gm8797	7dpi	-0.81689		63.4426	0.000162406	0.0033481	-3.77129	-2.93383	26.9546	pseudobulk	DESeq2	LRT	glmGamPoi	scranSumFactors
Fam227b	7dpi	-0.646477		114.464	0.000162915	0.00335533	-3.77051	-2.93316	26.9361	pseudobulk	DESeq2	LRT	glmGamPoi	scranSumFactors
1110038F14Rik	7dpi	-0.532556		324.532	0.000163158	0.00335706	-3.77014	-2.933	26.9274	pseudobulk	DESeq2	LRT	glmGamPoi	scranSumFactors
Rps20	7dpi	-0.492422		1229.07	0.000163568	0.00335788	-3.76951	-2.93292	26.9126	pseudobulk	DESeq2	LRT	glmGamPoi	scranSumFactors
Slc6a6	7dpi	0.289131		1236.37	0.000163666	0.00335788	3.76936	2.93292	26.9091	pseudobulk	DESeq2	LRT	glmGamPoi	scranSumFactors
Mrpl24	7dpi	-0.440521		330.286	0.000163675	0.00335788	-3.76935	-2.93292	26.9088	pseudobulk	DESeq2	LRT	glmGamPoi	scranSumFactors
Twf1	7dpi	-0.397637		254.132	0.000164039	0.00336208	-3.76879	-2.93253	26.8958	pseudobulk	DESeq2	LRT	glmGamPoi	scranSumFactors
Magef1	7dpi	-0.593398		273.594	0.000164827	0.00337496	-3.7676	-2.93135	26.8676	pseudobulk	DESeq2	LRT	glmGamPoi	scranSumFactors
ENSMUSG00000020992	7dpi	-0.504484		144.917	0.000165349	0.00338237	-3.76681	-2.93067	26.8491	pseudobulk	DESeq2	LRT	glmGamPoi	scranSumFactors
2310011J03Rik	7dpi	-0.68618		172.787	0.000165676	0.00338578	-3.76631	-2.93035	26.8375	pseudobulk	DESeq2	LRT	glmGamPoi	scranSumFactors
Gm40271	7dpi	-0.590156		146.042	0.000166231	0.00339385	-3.76548	-2.92961	26.8179	pseudobulk	DESeq2	LRT	glmGamPoi	scranSumFactors
Rer1	7dpi	-0.595708		617.713	0.000166682	0.00339976	-3.7648	-2.92907	26.802	pseudobulk	DESeq2	LRT	glmGamPoi	scranSumFactors
Hnrnpf	7dpi	-0.321196		557.387	0.000166993	0.00340157	-3.76433	-2.92891	26.7911	pseudobulk	DESeq2	LRT	glmGamPoi	scranSumFactors
Coro1a	7dpi	-0.436758		216.415	0.000167093	0.00340157	-3.76419	-2.92891	26.7876	pseudobulk	DESeq2	LRT	glmGamPoi	scranSumFactors
Arf1	7dpi	-0.551302		977.775	0.000167368	0.0034039	-3.76377	-2.92869	26.7779	pseudobulk	DESeq2	LRT	glmGamPoi	scranSumFactors
Ado	7dpi	-0.533788		156.718	0.000169739	0.00344881	-3.76026	-2.92462	26.6956	pseudobulk	DESeq2	LRT	glmGamPoi	scranSumFactors
Ccdc82	7dpi	0.38372		1042.97	0.00017015	0.00345383	3.75965	2.92416	26.6815	pseudobulk	DESeq2	LRT	glmGamPoi	scranSumFactors
H2aw	7dpi	-0.764798		89.4985	0.000170345	0.00345448	-3.75936	-2.9241	26.6748	pseudobulk	DESeq2	LRT	glmGamPoi	scranSumFactors
Trappc4	7dpi	-0.639944		635.309	0.000171055	0.00346122	-3.75832	-2.9235	26.6506	pseudobulk	DESeq2	LRT	glmGamPoi	scranSumFactors
Psmd10	7dpi	-0.654388		95.8186	0.000171246	0.00346122	-3.75805	-2.9235	26.6441	pseudobulk	DESeq2	LRT	glmGamPoi	scranSumFactors
1700123O20Rik	7dpi	-0.723167		114.478	0.000171365	0.00346122	-3.75787	-2.9235	26.64	pseudobulk	DESeq2	LRT	glmGamPoi	scranSumFactors
Efhc2	7dpi	0.563749		136.097	0.00017148	0.00346122	3.7577	2.9235	26.6361	pseudobulk	DESeq2	LRT	glmGamPoi	scranSumFactors
Mageb18	7dpi	-0.493984		199.354	0.000171497	0.00346122	-3.75768	-2.9235	26.6355	pseudobulk	DESeq2	LRT	glmGamPoi	scranSumFactors
ENSMUSG00000067870	7dpi	-0.668169		137.928	0.000171867	0.0034645	-3.75714	-2.9232	26.6229	pseudobulk	DESeq2	LRT	glmGamPoi	scranSumFactors
Mrps11	7dpi	-0.55487		178.045	0.000171987	0.0034645	-3.75696	-2.9232	26.6189	pseudobulk	DESeq2	LRT	glmGamPoi	scranSumFactors
Sycp2	7dpi	-0.345669		605.156	0.000172637	0.00347361	-3.75602	-2.92239	26.5969	pseudobulk	DESeq2	LRT	glmGamPoi	scranSumFactors
Gm9833	7dpi	0.52951		124.12	0.000172768	0.00347361	3.75583	2.92239	26.5924	pseudobulk	DESeq2	LRT	glmGamPoi	scranSumFactors
Cpsf4	7dpi	0.414126		290.883	0.000173032	0.00347561	3.75545	2.92221	26.5836	pseudobulk	DESeq2	LRT	glmGamPoi	scranSumFactors
1700047A11Rik	7dpi	-0.870419		46.3267	0.000173375	0.0034792	-3.75495	-2.92188	26.572	pseudobulk	DESeq2	LRT	glmGamPoi	scranSumFactors
Prdx2	7dpi	-0.610052		1133.8	0.000173567	0.00347974	-3.75467	-2.92184	26.5656	pseudobulk	DESeq2	LRT	glmGamPoi	scranSumFactors
Sorbs2os	7dpi	-0.627607		470.319	0.000173794	0.00348059	-3.75435	-2.92176	26.558	pseudobulk	DESeq2	LRT	glmGamPoi	scranSumFactors
Cep19	7dpi	-0.534122		450.636	0.000173939	0.00348059	-3.75414	-2.92176	26.5531	pseudobulk	DESeq2	LRT	glmGamPoi	scranSumFactors
ENSMUSG00000087086	7dpi	-0.793317		215.334	0.000175953	0.00351582	-3.75125	-2.91862	26.4862	pseudobulk	DESeq2	LRT	glmGamPoi	scranSumFactors
Itgad	7dpi	2.81318		130.448	0.000176119	0.00351582	3.75102	2.91862	26.4807	pseudobulk	DESeq2	LRT	glmGamPoi	scranSumFactors
Arfgef3	7dpi	0.280746		1811.73	0.000176786	0.00351582	3.75007	2.91862	26.4587	pseudobulk	DESeq2	LRT	glmGamPoi	scranSumFactors
Lratd2	7dpi	-0.914711		39.7031	0.000176796	0.00351582	-3.75005	-2.91862	26.4584	pseudobulk	DESeq2	LRT	glmGamPoi	scranSumFactors
Lhcgr	7dpi	-1.07298		36.7971	0.000176891	0.00351582	-3.74992	-2.91862	26.4553	pseudobulk	DESeq2	LRT	glmGamPoi	scranSumFactors
ENSMUSG00000097428	7dpi	-0.722102		188.108	0.000176986	0.00351582	-3.74979	-2.91862	26.4522	pseudobulk	DESeq2	LRT	glmGamPoi	scranSumFactors
Bmx	7dpi	-1.0946		26.045	0.000177089	0.00351582	-3.74964	-2.91862	26.4488	pseudobulk	DESeq2	LRT	glmGamPoi	scranSumFactors
Rassf9	7dpi	-2.02093		12.5114	0.000177168	0.00351582	-3.74953	-2.91862	26.4462	pseudobulk	DESeq2	LRT	glmGamPoi	scranSumFactors
ENSMUSG00000115433	7dpi	-1.00436		47.1551	0.000177197	0.00351582	-3.74949	-2.91862	26.4452	pseudobulk	DESeq2	LRT	glmGamPoi	scranSumFactors
Ap1s1	7dpi	-0.519117		404.744	0.000177372	0.00351598	-3.74924	-2.91861	26.4395	pseudobulk	DESeq2	LRT	glmGamPoi	scranSumFactors
D17H6S53E	7dpi	-0.585889		119.571	0.000177577	0.00351676	-3.74895	-2.91854	26.4328	pseudobulk	DESeq2	LRT	glmGamPoi	scranSumFactors
Rpl32	7dpi	-0.524489		1609.33	0.000178304	0.00352785	-3.74792	-2.91756	26.4091	pseudobulk	DESeq2	LRT	glmGamPoi	scranSumFactors
Chl1	7dpi	0.313084		3163.89	0.000178811	0.00353322	3.74721	2.91708	26.3927	pseudobulk	DESeq2	LRT	glmGamPoi	scranSumFactors
Rpl7a	7dpi	-0.697343		529.065	0.00017891	0.00353322	-3.74707	-2.91708	26.3895	pseudobulk	DESeq2	LRT	glmGamPoi	scranSumFactors
ENSMUSG00000086584	7dpi	-0.656668		84.9152	0.000179127	0.00353421	-3.74677	-2.917	26.3824	pseudobulk	DESeq2	LRT	glmGamPoi	scranSumFactors
Rnaset2a	7dpi	-0.757059		179.395	0.00017981	0.00354438	-3.74581	-2.9161	26.3604	pseudobulk	DESeq2	LRT	glmGamPoi	scranSumFactors
ENSMUSG00000115337	7dpi	-0.441467		555.322	0.000180794	0.00356044	-3.74444	-2.91469	26.3288	pseudobulk	DESeq2	LRT	glmGamPoi	scranSumFactors
Cdkn1b	7dpi	-0.474238		218.44	0.000182443	0.00358957	-3.74216	-2.91214	26.2763	pseudobulk	DESeq2	LRT	glmGamPoi	scranSumFactors
Pa2g4	7dpi	-0.474235		318.782	0.000182762	0.00359251	-3.74172	-2.91189	26.2662	pseudobulk	DESeq2	LRT	glmGamPoi	scranSumFactors
Fcer1g	7dpi	-1.21124		42.6318	0.000183385	0.00359931	-3.74087	-2.9113	26.2465	pseudobulk	DESeq2	LRT	glmGamPoi	scranSumFactors
ENSMUSG00000110147	7dpi	-1.22973		52.7661	0.000183449	0.00359931	-3.74078	-2.9113	26.2445	pseudobulk	DESeq2	LRT	glmGamPoi	scranSumFactors
ENSMUSG00000115918	7dpi	-0.566245		104.465	0.000184073	0.0036082	-3.73993	-2.91053	26.2249	pseudobulk	DESeq2	LRT	glmGamPoi	scranSumFactors
Fcrls	7dpi	-1.90826		21.7074	0.00018492	0.00362144	-3.73877	-2.90938	26.1984	pseudobulk	DESeq2	LRT	glmGamPoi	scranSumFactors
Cenpp	7dpi	-0.346381		577.647	0.000185908	0.00363743	-3.73743	-2.908	26.1677	pseudobulk	DESeq2	LRT	glmGamPoi	scranSumFactors
Dut	7dpi	-0.502593		224.784	0.000186555	0.0036443	-3.73656	-2.90741	26.1477	pseudobulk	DESeq2	LRT	glmGamPoi	scranSumFactors
4933433G19Rik	7dpi	-0.55001		167.696	0.000186709	0.0036443	-3.73635	-2.90741	26.143	pseudobulk	DESeq2	LRT	glmGamPoi	scranSumFactors
Rpl34	7dpi	-0.498312		1204.8	0.000186777	0.0036443	-3.73626	-2.90741	26.1409	pseudobulk	DESeq2	LRT	glmGamPoi	scranSumFactors
Synpr	7dpi	0.347353		1640.12	0.000186953	0.00364438	3.73602	2.90741	26.1354	pseudobulk	DESeq2	LRT	glmGamPoi	scranSumFactors
Rps6-ps4	7dpi	-0.584414		252.769	0.000187579	0.0036532	-3.73518	-2.90665	26.1162	pseudobulk	DESeq2	LRT	glmGamPoi	scranSumFactors
4732471J01Rik	7dpi	0.343462		1822.95	0.000187813	0.0036544	3.73487	2.90655	26.109	pseudobulk	DESeq2	LRT	glmGamPoi	scranSumFactors
ENSMUSG00000108704	7dpi	-0.538037		180.825	0.000188122	0.00365705	-3.73445	-2.90632	26.0996	pseudobulk	DESeq2	LRT	glmGamPoi	scranSumFactors
ENSMUSG00000091908	7dpi	-0.644751		181.37	0.000189012	0.00366998	-3.73327	-2.90522	26.0724	pseudobulk	DESeq2	LRT	glmGamPoi	scranSumFactors
Vta1	7dpi	-0.275623		739.399	0.000189135	0.00366998	-3.7331	-2.90522	26.0687	pseudobulk	DESeq2	LRT	glmGamPoi	scranSumFactors
Ggct	7dpi	-0.498975		166.338	0.000189591	0.00367336	-3.7325	-2.90493	26.0549	pseudobulk	DESeq2	LRT	glmGamPoi	scranSumFactors
Lsm2	7dpi	-0.636053		126.025	0.000189656	0.00367336	-3.73241	-2.90493	26.0529	pseudobulk	DESeq2	LRT	glmGamPoi	scranSumFactors
Cox7a1	7dpi	-1.06446		28.2714	0.000190216	0.00368083	-3.73167	-2.90429	26.0359	pseudobulk	DESeq2	LRT	glmGamPoi	scranSumFactors
Ier3ip1	7dpi	-0.545855		535.464	0.000190535	0.00368362	-3.73125	-2.90406	26.0263	pseudobulk	DESeq2	LRT	glmGamPoi	scranSumFactors
Nr2f2	7dpi	-0.818947		699.583	0.000190895	0.00368581	-3.73077	-2.90387	26.0155	pseudobulk	DESeq2	LRT	glmGamPoi	scranSumFactors
Pgp	7dpi	-0.516838		818.863	0.000190997	0.00368581	-3.73064	-2.90387	26.0124	pseudobulk	DESeq2	LRT	glmGamPoi	scranSumFactors
Fkbp1b	7dpi	-0.608926		96.7956	0.000191414	0.00369048	-3.73009	-2.90347	25.9999	pseudobulk	DESeq2	LRT	glmGamPoi	scranSumFactors
[truncated: 20,045 more rows]

## Sheet: 23dpi - DEG - across all
genes	dpi	logFC	lfcSE	baseMean	PValue	FDR	Z	Za	stat	method	package	test	fit	sizeFactor
[truncated: 21,160 more rows]

[truncated: 6 more sheets: GABA - DEG - across celltype, Glut - DEG - across celltype, NonN - DEG - across celltype, GABA - DEG - across cellcluster, Glut - DEG - across cellcluster, NonN - DEG - across cellcluster]
