# Supplementary material for: Molecular Consequences of Peripheral Influenza A Infection on Cell Populations in the Murine Hypothalamus
Source: bioRxiv preprint, doi:10.1101/2023.03.06.530999, version 2 (2023-06-19)
Supplement: Supplemental Table 7 [file 530999_file09.xlsx]

## Sheet: reactome.ct
ID	Description	GeneRatio	BgRatio	pvalue	p.adjust	qvalue	geneID	Count	dpi	cluster_id
R-MMU-1799339	SRP-dependent cotranslational protein targeting to membrane	39/94	88/8846	1.23113e-56	6.57424e-54	4.63942e-54	Rpl24/Rps5/Rpl35/Rps24/Rpl13/Rpl3/Rps29/Rps8/Rpl14/Rpsa/Rpl7/Rplp1/Rps15a/Rpl28/Rpl19/Rpl9/Rps3/Rpl30/Rpl6/Rps2/Rpl11/Rplp2/Rpl27/Rps14/Rpl23/Rpl34/Rpl18a/Rps21/Rpl8/Rps11/Rps4x/Rps27rt/Rps27/Rps13/Rpl38/Rps20/Rpl27a/Rpl37a/Rpl37	39	3dpi	NonN_8
R-MMU-975956	Nonsense Mediated Decay (NMD) independent of the Exon Junction Complex (EJC)	39/94	90/8846	3.82e-56	1.01994e-53	7.19768e-54	Rpl24/Rps5/Rpl35/Rps24/Rpl13/Rpl3/Rps29/Rps8/Rpl14/Rpsa/Rpl7/Rplp1/Rps15a/Rpl28/Rpl19/Rpl9/Rps3/Rpl30/Rpl6/Rps2/Rpl11/Rplp2/Rpl27/Rps14/Rpl23/Rpl34/Rpl18a/Rps21/Rpl8/Rps11/Rps4x/Rps27rt/Rps27/Rps13/Rpl38/Rps20/Rpl27a/Rpl37a/Rpl37	39	3dpi	NonN_8
R-MMU-72689	Formation of a pool of free 40S subunits	39/94	97/8846	1.56339e-54	2.78284e-52	1.96384e-52	Rpl24/Rps5/Rpl35/Rps24/Rpl13/Rpl3/Rps29/Rps8/Rpl14/Rpsa/Rpl7/Rplp1/Rps15a/Rpl28/Rpl19/Rpl9/Rps3/Rpl30/Rpl6/Rps2/Rpl11/Rplp2/Rpl27/Rps14/Rpl23/Rpl34/Rpl18a/Rps21/Rpl8/Rps11/Rps4x/Rps27rt/Rps27/Rps13/Rpl38/Rps20/Rpl27a/Rpl37a/Rpl37	39	3dpi	NonN_8
R-MMU-156827	L13a-mediated translational silencing of Ceruloplasmin expression	39/94	107/8846	1.77668e-52	2.37187e-50	1.67382e-50	Rpl24/Rps5/Rpl35/Rps24/Rpl13/Rpl3/Rps29/Rps8/Rpl14/Rpsa/Rpl7/Rplp1/Rps15a/Rpl28/Rpl19/Rpl9/Rps3/Rpl30/Rpl6/Rps2/Rpl11/Rplp2/Rpl27/Rps14/Rpl23/Rpl34/Rpl18a/Rps21/Rpl8/Rps11/Rps4x/Rps27rt/Rps27/Rps13/Rpl38/Rps20/Rpl27a/Rpl37a/Rpl37	39	3dpi	NonN_8
R-MMU-72706	GTP hydrolysis and joining of the 60S ribosomal subunit	39/94	108/8846	2.76384e-52	2.95178e-50	2.08306e-50	Rpl24/Rps5/Rpl35/Rps24/Rpl13/Rpl3/Rps29/Rps8/Rpl14/Rpsa/Rpl7/Rplp1/Rps15a/Rpl28/Rpl19/Rpl9/Rps3/Rpl30/Rpl6/Rps2/Rpl11/Rplp2/Rpl27/Rps14/Rpl23/Rpl34/Rpl18a/Rps21/Rpl8/Rps11/Rps4x/Rps27rt/Rps27/Rps13/Rpl38/Rps20/Rpl27a/Rpl37a/Rpl37	39	3dpi	NonN_8
R-MMU-927802	Nonsense-Mediated Decay (NMD)	39/94	110/8846	6.58614e-52	5.02429e-50	3.54562e-50	Rpl24/Rps5/Rpl35/Rps24/Rpl13/Rpl3/Rps29/Rps8/Rpl14/Rpsa/Rpl7/Rplp1/Rps15a/Rpl28/Rpl19/Rpl9/Rps3/Rpl30/Rpl6/Rps2/Rpl11/Rplp2/Rpl27/Rps14/Rpl23/Rpl34/Rpl18a/Rps21/Rpl8/Rps11/Rps4x/Rps27rt/Rps27/Rps13/Rpl38/Rps20/Rpl27a/Rpl37a/Rpl37	39	3dpi	NonN_8
R-MMU-975957	Nonsense Mediated Decay (NMD) enhanced by the Exon Junction Complex (EJC)	39/94	110/8846	6.58614e-52	5.02429e-50	3.54562e-50	Rpl24/Rps5/Rpl35/Rps24/Rpl13/Rpl3/Rps29/Rps8/Rpl14/Rpsa/Rpl7/Rplp1/Rps15a/Rpl28/Rpl19/Rpl9/Rps3/Rpl30/Rpl6/Rps2/Rpl11/Rplp2/Rpl27/Rps14/Rpl23/Rpl34/Rpl18a/Rps21/Rpl8/Rps11/Rps4x/Rps27rt/Rps27/Rps13/Rpl38/Rps20/Rpl27a/Rpl37a/Rpl37	39	3dpi	NonN_8
R-MMU-72613	Eukaryotic Translation Initiation	39/94	115/8846	5.30548e-51	3.14792e-49	2.22147e-49	Rpl24/Rps5/Rpl35/Rps24/Rpl13/Rpl3/Rps29/Rps8/Rpl14/Rpsa/Rpl7/Rplp1/Rps15a/Rpl28/Rpl19/Rpl9/Rps3/Rpl30/Rpl6/Rps2/Rpl11/Rplp2/Rpl27/Rps14/Rpl23/Rpl34/Rpl18a/Rps21/Rpl8/Rps11/Rps4x/Rps27rt/Rps27/Rps13/Rpl38/Rps20/Rpl27a/Rpl37a/Rpl37	39	3dpi	NonN_8
R-MMU-72737	Cap-dependent Translation Initiation	39/94	115/8846	5.30548e-51	3.14792e-49	2.22147e-49	Rpl24/Rps5/Rpl35/Rps24/Rpl13/Rpl3/Rps29/Rps8/Rpl14/Rpsa/Rpl7/Rplp1/Rps15a/Rpl28/Rpl19/Rpl9/Rps3/Rpl30/Rpl6/Rps2/Rpl11/Rplp2/Rpl27/Rps14/Rpl23/Rpl34/Rpl18a/Rps21/Rpl8/Rps11/Rps4x/Rps27rt/Rps27/Rps13/Rpl38/Rps20/Rpl27a/Rpl37a/Rpl37	39	3dpi	NonN_8
R-MMU-6791226	Major pathway of rRNA processing in the nucleolus and cytosol	39/94	171/8846	2.68563e-43	1.1951e-41	8.43381e-42	Rpl24/Rps5/Rpl35/Rps24/Rpl13/Rpl3/Rps29/Rps8/Rpl14/Rpsa/Rpl7/Rplp1/Rps15a/Rpl28/Rpl19/Rpl9/Rps3/Rpl30/Rpl6/Rps2/Rpl11/Rplp2/Rpl27/Rps14/Rpl23/Rpl34/Rpl18a/Rps21/Rpl8/Rps11/Rps4x/Rps27rt/Rps27/Rps13/Rpl38/Rps20/Rpl27a/Rpl37a/Rpl37	39	3dpi	NonN_8
R-MMU-72312	rRNA processing	39/94	171/8846	2.68563e-43	1.1951e-41	8.43381e-42	Rpl24/Rps5/Rpl35/Rps24/Rpl13/Rpl3/Rps29/Rps8/Rpl14/Rpsa/Rpl7/Rplp1/Rps15a/Rpl28/Rpl19/Rpl9/Rps3/Rpl30/Rpl6/Rps2/Rpl11/Rplp2/Rpl27/Rps14/Rpl23/Rpl34/Rpl18a/Rps21/Rpl8/Rps11/Rps4x/Rps27rt/Rps27/Rps13/Rpl38/Rps20/Rpl27a/Rpl37a/Rpl37	39	3dpi	NonN_8
R-MMU-8868773	rRNA processing in the nucleus and cytosol	39/94	171/8846	2.68563e-43	1.1951e-41	8.43381e-42	Rpl24/Rps5/Rpl35/Rps24/Rpl13/Rpl3/Rps29/Rps8/Rpl14/Rpsa/Rpl7/Rplp1/Rps15a/Rpl28/Rpl19/Rpl9/Rps3/Rpl30/Rpl6/Rps2/Rpl11/Rplp2/Rpl27/Rps14/Rpl23/Rpl34/Rpl18a/Rps21/Rpl8/Rps11/Rps4x/Rps27rt/Rps27/Rps13/Rpl38/Rps20/Rpl27a/Rpl37a/Rpl37	39	3dpi	NonN_8
R-MMU-72766	Translation	39/94	220/8846	1.1211e-38	4.60515e-37	3.24984e-37	Rpl24/Rps5/Rpl35/Rps24/Rpl13/Rpl3/Rps29/Rps8/Rpl14/Rpsa/Rpl7/Rplp1/Rps15a/Rpl28/Rpl19/Rpl9/Rps3/Rpl30/Rpl6/Rps2/Rpl11/Rplp2/Rpl27/Rps14/Rpl23/Rpl34/Rpl18a/Rps21/Rpl8/Rps11/Rps4x/Rps27rt/Rps27/Rps13/Rpl38/Rps20/Rpl27a/Rpl37a/Rpl37	39	3dpi	NonN_8
R-MMU-72695	Formation of the ternary complex, and subsequently, the 43S complex	16/94	50/8846	2.56546e-20	9.78539e-19	6.90552e-19	Rps5/Rps24/Rps29/Rps8/Rpsa/Rps15a/Rps3/Rps2/Rps14/Rps21/Rps11/Rps4x/Rps27rt/Rps27/Rps13/Rps20	16	3dpi	NonN_8
R-MMU-72649	Translation initiation complex formation	16/94	57/8846	2.84522e-19	9.49592e-18	6.70124e-18	Rps5/Rps24/Rps29/Rps8/Rpsa/Rps15a/Rps3/Rps2/Rps14/Rps21/Rps11/Rps4x/Rps27rt/Rps27/Rps13/Rps20	16	3dpi	NonN_8
R-MMU-72702	Ribosomal scanning and start codon recognition	16/94	57/8846	2.84522e-19	9.49592e-18	6.70124e-18	Rps5/Rps24/Rps29/Rps8/Rpsa/Rps15a/Rps3/Rps2/Rps14/Rps21/Rps11/Rps4x/Rps27rt/Rps27/Rps13/Rps20	16	3dpi	NonN_8
R-MMU-72662	Activation of the mRNA upon binding of the cap-binding complex and eIFs, and subsequent binding to 43S	16/94	58/8846	3.89634e-19	1.22391e-17	8.63709e-18	Rps5/Rps24/Rps29/Rps8/Rpsa/Rps15a/Rps3/Rps2/Rps14/Rps21/Rps11/Rps4x/Rps27rt/Rps27/Rps13/Rps20	16	3dpi	NonN_8
R-MMU-163200	Respiratory electron transport, ATP synthesis by chemiosmotic coupling, and heat production by uncoupling proteins.	10/94	116/8846	3.6486e-07	1.08242e-05	7.63858e-06	Cox5a/Cox4i1/Cox8a/Atp5j/Cox6b1/Ndufa7/Uqcrq/Ndufa4/Atp5j2/Ndufc2	10	3dpi	NonN_8
R-MMU-1428517	The citric acid (TCA) cycle and respiratory electron transport	11/94	167/8846	1.39191e-06	3.91201e-05	2.76069e-05	Cox5a/Cox4i1/Bsg/Cox8a/Atp5j/Cox6b1/Ndufa7/Uqcrq/Ndufa4/Atp5j2/Ndufc2	11	3dpi	NonN_8
R-MMU-611105	Respiratory electron transport	8/94	92/8846	5.39002e-06	0.000143913	0.000101559	Cox5a/Cox4i1/Cox8a/Cox6b1/Ndufa7/Uqcrq/Ndufa4/Ndufc2	8	3dpi	NonN_8
R-MMU-5626467	RHO GTPases activate IQGAPs	4/94	14/8846	1.10335e-05	0.000280565	0.000197994	Actb/Cdc42/Calm1/Calm2	4	3dpi	NonN_8
R-MMU-9711123	Cellular response to chemical stress	9/94	139/8846	1.5453e-05	0.000375087	0.000264698	Gstp1/Cox5a/Cox4i1/Prdx1/Cox8a/Ubb/Cox6b1/Rps27a/Ndufa4	9	3dpi	NonN_8
R-MMU-2262752	Cellular responses to stress	16/94	499/8846	6.32982e-05	0.00146962	0.00103711	Hsp90ab1/Gstp1/Cox5a/Cox4i1/Epas1/Prdx1/Cox8a/H3f3b/Elob/Ubb/Atp6v0c/Dynll1/Cox6b1/Tuba1a/Rps27a/Ndufa4	16	3dpi	NonN_8
R-MMU-5628897	TP53 Regulates Metabolic Genes	6/94	70/8846	9.29964e-05	0.00206917	0.00146021	Cox5a/Cox4i1/Prdx1/Cox8a/Cox6b1/Ndufa4	6	3dpi	NonN_8
R-MMU-9707564	Cytoprotection by HMOX1	7/94	107/8846	0.000134219	0.00286691	0.00202317	Cox5a/Cox4i1/Cox8a/Ubb/Cox6b1/Rps27a/Ndufa4	7	3dpi	NonN_8
R-MMU-9648002	RAS processing	4/94	26/8846	0.000149443	0.00306933	0.00216602	Ubb/Calm1/Rps27a/Calm2	4	3dpi	NonN_8
R-MMU-425561	Sodium/Calcium exchangers	3/94	12/8846	0.000238504	0.00471709	0.00332883	Slc8a3/Calm1/Calm2	3	3dpi	NonN_8
R-MMU-418359	Reduction of cytosolic Ca++ levels	3/94	14/8846	0.000388573	0.00741065	0.00522967	Slc8a3/Calm1/Calm2	3	3dpi	NonN_8
R-MMU-5663220	RHO GTPases Activate Formins	7/94	131/8846	0.000467326	0.00860524	0.00607269	Actb/Cdc42/Diaph2/Dynll1/Rps27rt/Rps27/Tuba1a	7	3dpi	NonN_8
R-MMU-9646399	Aggrephagy	4/94	36/8846	0.000542902	0.00966366	0.00681961	Ubb/Dynll1/Tuba1a/Rps27a	4	3dpi	NonN_8
R-MMU-5627123	RHO GTPases activate PAKs	3/94	18/8846	0.000844648	0.0145497	0.0102677	Cdc42/Calm1/Calm2	3	3dpi	NonN_8
R-MMU-8876725	Protein methylation	3/94	19/8846	0.000995329	0.0161062	0.0113661	Rps2/Calm1/Calm2	3	3dpi	NonN_8
R-MMU-9705462	Inactivation of CSF3 (G-CSF) signaling	3/94	19/8846	0.000995329	0.0161062	0.0113661	Elob/Ubb/Rps27a	3	3dpi	NonN_8
R-MMU-195258	RHO GTPase Effectors	10/94	304/8846	0.00139133	0.0218521	0.015421	Actb/Cdc42/Diaph2/H3f3b/Dynll1/Rps27rt/Rps27/Tuba1a/Calm1/Calm2	10	3dpi	NonN_8
R-MMU-9674555	Signaling by CSF3 (G-CSF)	3/94	23/8846	0.00176403	0.026914	0.0189931	Elob/Ubb/Rps27a	3	3dpi	NonN_8
R-MMU-983712	Ion channel transport	7/94	170/8846	0.00215296	0.0316384	0.0223272	Atp1a2/Atp8a2/Ubb/Atp6v0c/Calm1/Rps27a/Calm2	7	3dpi	NonN_8
R-MMU-5578775	Ion homeostasis	4/94	52/8846	0.00219218	0.0316384	0.0223272	Atp1a2/Slc8a3/Calm1/Calm2	4	3dpi	NonN_8
R-MMU-418360	Platelet calcium homeostasis	3/94	25/8846	0.00225603	0.0317032	0.0223729	Slc8a3/Calm1/Calm2	3	3dpi	NonN_8
R-MMU-936837	Ion transport by P-type ATPases	4/94	53/8846	0.00235207	0.0322052	0.0227271	Atp1a2/Atp8a2/Calm1/Calm2	4	3dpi	NonN_8
R-MMU-3700989	Transcriptional Regulation by TP53	9/94	282/8846	0.00297382	0.0397006	0.0280166	Cox5a/Cox4i1/Prdx1/Cox8a/Elob/Ubb/Cox6b1/Rps27a/Ndufa4	9	3dpi	NonN_8
R-MMU-182971	EGFR downregulation	3/94	30/8846	0.00383264	0.0499178	0.0352269	Cdc42/Ubb/Rps27a	3	3dpi	NonN_8
R-MMU-168928	DDX58/IFIH1-mediated induction of interferon-alpha/beta	3/94	31/8846	0.00421093	0.0535389	0.0377822	Hsp90ab1/Ubb/Rps27a	3	3dpi	NonN_8
R-MMU-9663891	Selective autophagy	4/94	63/8846	0.00441414	0.0540394	0.0381354	Ubb/Dynll1/Tuba1a/Rps27a	4	3dpi	NonN_8
R-MMU-451306	Ionotropic activity of kainate receptors	2/94	10/8846	0.00475628	0.0540394	0.0381354	Calm1/Calm2	2	3dpi	NonN_8
R-MMU-451308	Activation of Ca-permeable Kainate Receptor	2/94	10/8846	0.00475628	0.0540394	0.0381354	Calm1/Calm2	2	3dpi	NonN_8
R-MMU-5689877	Josephin domain DUBs	2/94	10/8846	0.00475628	0.0540394	0.0381354	Ubb/Rps27a	2	3dpi	NonN_8
R-MMU-9708530	Regulation of BACH1 activity	2/94	10/8846	0.00475628	0.0540394	0.0381354	Ubb/Rps27a	2	3dpi	NonN_8
R-MMU-1234176	Oxygen-dependent proline hydroxylation of Hypoxia-inducible Factor Alpha	4/94	65/8846	0.0049371	0.0548559	0.0387116	Epas1/Elob/Ubb/Rps27a	4	3dpi	NonN_8
R-MMU-5696394	DNA Damage Recognition in GG-NER	3/94	33/8846	0.00503359	0.0548559	0.0387116	Actb/Ubb/Rps27a	3	3dpi	NonN_8
R-MMU-3134975	Regulation of innate immune responses to cytosolic DNA	2/94	11/8846	0.00577317	0.059286	0.0418379	Ubb/Rps27a	2	3dpi	NonN_8
R-MMU-438064	Post NMDA receptor activation events	2/94	11/8846	0.00577317	0.059286	0.0418379	Calm1/Calm2	2	3dpi	NonN_8
R-MMU-5684264	MAP3K8 (TPL2)-dependent MAPK1/3 activation	2/94	11/8846	0.00577317	0.059286	0.0418379	Ubb/Rps27a	2	3dpi	NonN_8
R-MMU-1234174	Cellular response to hypoxia	4/94	69/8846	0.00610466	0.0615073	0.0434055	Epas1/Elob/Ubb/Rps27a	4	3dpi	NonN_8
R-MMU-203615	eNOS activation	2/94	12/8846	0.0068801	0.0633444	0.0447019	Calm1/Calm2	2	3dpi	NonN_8
R-MMU-209543	p75NTR recruits signalling complexes	2/94	12/8846	0.0068801	0.0633444	0.0447019	Ubb/Rps27a	2	3dpi	NonN_8
R-MMU-209560	NF-kB is activated and signals survival	2/94	12/8846	0.0068801	0.0633444	0.0447019	Ubb/Rps27a	2	3dpi	NonN_8
R-MMU-937039	IRAK1 recruits IKK complex	2/94	12/8846	0.0068801	0.0633444	0.0447019	Ubb/Rps27a	2	3dpi	NonN_8
R-MMU-975144	IRAK1 recruits IKK complex upon TLR7/8 or 9 stimulation	2/94	12/8846	0.0068801	0.0633444	0.0447019	Ubb/Rps27a	2	3dpi	NonN_8
R-MMU-5687128	MAPK6/MAPK4 signaling	4/94	72/8846	0.0070919	0.0641877	0.0452971	Cdc42/Ubb/Septin7/Rps27a	4	3dpi	NonN_8
R-MMU-1168372	Downstream signaling events of B Cell Receptor (BCR)	4/94	74/8846	0.00780553	0.0653348	0.0461066	Ubb/Calm1/Rps27a/Calm2	4	3dpi	NonN_8
R-MMU-8852276	The role of GTSE1 in G2/M progression after G2 checkpoint	4/94	74/8846	0.00780553	0.0653348	0.0461066	Hsp90ab1/Ubb/Tuba1a/Rps27a	4	3dpi	NonN_8
R-MMU-205043	NRIF signals cell death from the nucleus	2/94	13/8846	0.00807509	0.0653348	0.0461066	Ubb/Rps27a	2	3dpi	NonN_8
R-MMU-2173791	TGF-beta receptor signaling in EMT (epithelial to mesenchymal transition)	2/94	13/8846	0.00807509	0.0653348	0.0461066	Ubb/Rps27a	2	3dpi	NonN_8
R-MMU-936440	Negative regulators of DDX58/IFIH1 signaling	2/94	13/8846	0.00807509	0.0653348	0.0461066	Ubb/Rps27a	2	3dpi	NonN_8
R-MMU-9706369	Negative regulation of FLT3	2/94	13/8846	0.00807509	0.0653348	0.0461066	Ubb/Rps27a	2	3dpi	NonN_8
R-MMU-975163	IRAK2 mediated activation of TAK1 complex upon TLR7/8 or 9 stimulation	2/94	13/8846	0.00807509	0.0653348	0.0461066	Ubb/Rps27a	2	3dpi	NonN_8
R-MMU-110312	Translesion synthesis by REV1	2/94	14/8846	0.00935617	0.0693916	0.0489694	Ubb/Rps27a	2	3dpi	NonN_8
R-MMU-2173788	Downregulation of TGF-beta receptor signaling	2/94	14/8846	0.00935617	0.0693916	0.0489694	Ubb/Rps27a	2	3dpi	NonN_8
R-MMU-2559585	Oncogene Induced Senescence	2/94	14/8846	0.00935617	0.0693916	0.0489694	Ubb/Rps27a	2	3dpi	NonN_8
R-MMU-532668	N-glycan trimming in the ER and Calnexin/Calreticulin cycle	2/94	14/8846	0.00935617	0.0693916	0.0489694	Ubb/Rps27a	2	3dpi	NonN_8
R-MMU-8978934	Metabolism of cofactors	2/94	14/8846	0.00935617	0.0693916	0.0489694	Calm1/Calm2	2	3dpi	NonN_8
R-MMU-937072	TRAF6-mediated induction of TAK1 complex within TLR4 complex	2/94	14/8846	0.00935617	0.0693916	0.0489694	Ubb/Rps27a	2	3dpi	NonN_8
R-MMU-1295596	Spry regulation of FGF signaling	2/94	15/8846	0.0107214	0.0725996	0.0512333	Ubb/Rps27a	2	3dpi	NonN_8
R-MMU-193639	p75NTR signals via NF-kB	2/94	15/8846	0.0107214	0.0725996	0.0512333	Ubb/Rps27a	2	3dpi	NonN_8
R-MMU-5655862	Translesion synthesis by POLK	2/94	15/8846	0.0107214	0.0725996	0.0512333	Ubb/Rps27a	2	3dpi	NonN_8
R-MMU-5656121	Translesion synthesis by POLI	2/94	15/8846	0.0107214	0.0725996	0.0512333	Ubb/Rps27a	2	3dpi	NonN_8
R-MMU-70221	Glycogen breakdown (glycogenolysis)	2/94	15/8846	0.0107214	0.0725996	0.0512333	Calm1/Calm2	2	3dpi	NonN_8
R-MMU-936964	Activation of IRF3/IRF7 mediated by TBK1/IKK epsilon	2/94	15/8846	0.0107214	0.0725996	0.0512333	Ubb/Rps27a	2	3dpi	NonN_8
R-MMU-9006934	Signaling by Receptor Tyrosine Kinases	10/94	406/8846	0.0107404	0.0725996	0.0512333	Actb/Ptn/Cdc42/Ntrk3/Ubb/Atp6v0c/Rap1a/Calm1/Rps27a/Calm2	10	3dpi	NonN_8
R-MMU-5683057	MAPK family signaling cascades	8/94	288/8846	0.0113309	0.0756338	0.0533745	Actb/Cdc42/Ubb/Rap1a/Septin7/Calm1/Rps27a/Calm2	8	3dpi	NonN_8
R-MMU-2565942	Regulation of PLK1 Activity at G2/M Transition	4/94	83/8846	0.011599	0.0764498	0.0539504	Ubb/Dynll1/Tuba1a/Rps27a	4	3dpi	NonN_8
R-MMU-177929	Signaling by EGFR	3/94	45/8846	0.0119468	0.0764498	0.0539504	Cdc42/Ubb/Rps27a	3	3dpi	NonN_8
R-MMU-111931	PKA-mediated phosphorylation of CREB	2/94	16/8846	0.012169	0.0764498	0.0539504	Calm1/Calm2	2	3dpi	NonN_8
R-MMU-163615	PKA activation	2/94	16/8846	0.012169	0.0764498	0.0539504	Calm1/Calm2	2	3dpi	NonN_8
R-MMU-202131	Metabolism of nitric oxide: NOS3 activation and regulation	2/94	16/8846	0.012169	0.0764498	0.0539504	Calm1/Calm2	2	3dpi	NonN_8
R-MMU-2467813	Separation of Sister Chromatids	6/94	181/8846	0.0124537	0.077329	0.0545708	Ubb/Dynll1/Rps27rt/Rps27/Tuba1a/Rps27a	6	3dpi	NonN_8
R-MMU-168643	Nucleotide-binding domain, leucine rich repeat containing receptor (NLR) signaling pathways	3/94	46/8846	0.0126835	0.0778507	0.054939	Hsp90ab1/Ubb/Rps27a	3	3dpi	NonN_8
R-MMU-110320	Translesion Synthesis by POLH	2/94	17/8846	0.0136969	0.0812684	0.0573509	Ubb/Rps27a	2	3dpi	NonN_8
R-MMU-2173795	Downregulation of SMAD2/3:SMAD4 transcriptional activity	2/94	17/8846	0.0136969	0.0812684	0.0573509	Ubb/Rps27a	2	3dpi	NonN_8
R-MMU-6804760	Regulation of TP53 Activity through Methylation	2/94	17/8846	0.0136969	0.0812684	0.0573509	Ubb/Rps27a	2	3dpi	NonN_8
R-MMU-5607764	CLEC7A (Dectin-1) signaling	4/94	89/8846	0.0146902	0.0842479	0.0594535	Ubb/Calm1/Rps27a/Calm2	4	3dpi	NonN_8
R-MMU-163210	Formation of ATP by chemiosmotic coupling	2/94	18/8846	0.0153035	0.0842479	0.0594535	Atp5j/Atp5j2	2	3dpi	NonN_8
R-MMU-1980143	Signaling by NOTCH1	2/94	18/8846	0.0153035	0.0842479	0.0594535	Ubb/Rps27a	2	3dpi	NonN_8
R-MMU-376176	Signaling by ROBO receptors	2/94	18/8846	0.0153035	0.0842479	0.0594535	Ubb/Rps27a	2	3dpi	NonN_8
R-MMU-8949613	Cristae formation	2/94	18/8846	0.0153035	0.0842479	0.0594535	Atp5j/Atp5j2	2	3dpi	NonN_8
R-MMU-9012852	Signaling by NOTCH3	2/94	18/8846	0.0153035	0.0842479	0.0594535	Ubb/Rps27a	2	3dpi	NonN_8
R-MMU-9013507	NOTCH3 Activation and Transmission of Signal to the Nucleus	2/94	18/8846	0.0153035	0.0842479	0.0594535	Ubb/Rps27a	2	3dpi	NonN_8
R-MMU-3371497	HSP90 chaperone cycle for steroid hormone receptors (SHR) in the presence of ligand	3/94	50/8846	0.0158868	0.086567	0.0610901	Hsp90ab1/Dynll1/Tuba1a	3	3dpi	NonN_8
R-MMU-4420097	VEGFA-VEGFR2 Pathway	4/94	92/8846	0.0164136	0.088534	0.0624782	Actb/Cdc42/Calm1/Calm2	4	3dpi	NonN_8
R-MMU-4641263	Regulation of FZD by ubiquitination	2/94	19/8846	0.0169868	0.0889307	0.0627581	Ubb/Rps27a	2	3dpi	NonN_8
R-MMU-5696397	Gap-filling DNA repair synthesis and ligation in GG-NER	2/94	19/8846	0.0169868	0.0889307	0.0627581	Ubb/Rps27a	2	3dpi	NonN_8
R-MMU-6807004	Negative regulation of MET activity	2/94	19/8846	0.0169868	0.0889307	0.0627581	Ubb/Rps27a	2	3dpi	NonN_8
R-MMU-450321	JNK (c-Jun kinases) phosphorylation and activation mediated by activated human TAK1	2/94	20/8846	0.0187451	0.0944328	0.0666409	Ubb/Rps27a	2	3dpi	NonN_8
R-MMU-8982491	Glycogen metabolism	2/94	20/8846	0.0187451	0.0944328	0.0666409	Calm1/Calm2	2	3dpi	NonN_8
R-MMU-912631	Regulation of signaling by CBL	2/94	20/8846	0.0187451	0.0944328	0.0666409	Ubb/Rps27a	2	3dpi	NonN_8
R-MMU-937041	IKK complex recruitment mediated by RIP1	2/94	20/8846	0.0187451	0.0944328	0.0666409	Ubb/Rps27a	2	3dpi	NonN_8
R-MMU-2672351	Stimuli-sensing channels	4/94	97/8846	0.0195585	0.0976098	0.0688829	Ubb/Calm1/Rps27a/Calm2	4	3dpi	NonN_8
R-MMU-983705	Signaling by the B Cell Receptor (BCR)	4/94	98/8846	0.0202291	0.0981065	0.0692334	Ubb/Calm1/Rps27a/Calm2	4	3dpi	NonN_8
R-MMU-917937	Iron uptake and transport	3/94	55/8846	0.0204746	0.0981065	0.0692334	Ubb/Atp6v0c/Rps27a	3	3dpi	NonN_8
R-MMU-2173789	TGF-beta receptor signaling activates SMADs	2/94	21/8846	0.0205766	0.0981065	0.0692334	Ubb/Rps27a	2	3dpi	NonN_8
R-MMU-438066	Unblocking of NMDA receptors, glutamate binding and activation	2/94	21/8846	0.0205766	0.0981065	0.0692334	Calm1/Calm2	2	3dpi	NonN_8
R-MMU-450302	activated TAK1 mediates p38 MAPK activation	2/94	21/8846	0.0205766	0.0981065	0.0692334	Ubb/Rps27a	2	3dpi	NonN_8
R-MMU-194138	Signaling by VEGF	4/94	100/8846	0.0216126	0.102134	0.0720756	Actb/Cdc42/Calm1/Calm2	4	3dpi	NonN_8
R-MMU-2173796	SMAD2/SMAD3:SMAD4 heterotrimer regulates transcription	2/94	22/8846	0.0224797	0.104444	0.0737058	Ubb/Rps27a	2	3dpi	NonN_8
R-MMU-2029482	Regulation of actin dynamics for phagocytic cup formation	3/94	57/8846	0.0224926	0.104444	0.0737058	Hsp90ab1/Actb/Cdc42	3	3dpi	NonN_8
R-MMU-174048	APC/C:Cdc20 mediated degradation of Cyclin B	2/94	23/8846	0.0244526	0.111604	0.0787589	Ubb/Rps27a	2	3dpi	NonN_8
R-MMU-210991	Basigin interactions	2/94	23/8846	0.0244526	0.111604	0.0787589	Bsg/Ppia	2	3dpi	NonN_8
R-MMU-68882	Mitotic Anaphase	6/94	213/8846	0.025624	0.115959	0.0818322	Ubb/Dynll1/Rps27rt/Rps27/Tuba1a/Rps27a	6	3dpi	NonN_8
R-MMU-9648025	EML4 and NUDC in mitotic spindle formation	4/94	106/8846	0.0261059	0.11634	0.0821011	Dynll1/Rps27rt/Rps27/Tuba1a	4	3dpi	NonN_8
R-MMU-2555396	Mitotic Metaphase and Anaphase	6/94	214/8846	0.0261439	0.11634	0.0821011	Ubb/Dynll1/Rps27rt/Rps27/Tuba1a/Rps27a	6	3dpi	NonN_8
R-MMU-8863795	Downregulation of ERBB2 signaling	2/94	24/8846	0.0264937	0.116923	0.082512	Ubb/Rps27a	2	3dpi	NonN_8
R-MMU-5621481	C-type lectin receptors (CLRs)	4/94	107/8846	0.0269053	0.117766	0.0831071	Ubb/Calm1/Rps27a/Calm2	4	3dpi	NonN_8
R-MMU-111933	Calmodulin induced events	2/94	25/8846	0.0286014	0.122185	0.0862256	Calm1/Calm2	2	3dpi	NonN_8
R-MMU-111997	CaM pathway	2/94	25/8846	0.0286014	0.122185	0.0862256	Calm1/Calm2	2	3dpi	NonN_8
R-MMU-179409	APC-Cdc20 mediated degradation of Nek2A	2/94	25/8846	0.0286014	0.122185	0.0862256	Ubb/Rps27a	2	3dpi	NonN_8
R-MMU-1489509	DAG and IP3 signaling	2/94	26/8846	0.0307739	0.129138	0.0911324	Calm1/Calm2	2	3dpi	NonN_8
R-MMU-5576891	Cardiac conduction	4/94	114/8846	0.0329124	0.129138	0.0911324	Atp1a2/Slc8a3/Calm1/Calm2	4	3dpi	NonN_8
R-MMU-110314	Recognition of DNA damage by PCNA-containing replication complex	2/94	27/8846	0.0330098	0.129138	0.0911324	Ubb/Rps27a	2	3dpi	NonN_8
R-MMU-111996	Ca-dependent events	2/94	27/8846	0.0330098	0.129138	0.0911324	Calm1/Calm2	2	3dpi	NonN_8
R-MMU-1855204	Synthesis of IP3 and IP4 in the cytosol	2/94	27/8846	0.0330098	0.129138	0.0911324	Calm1/Calm2	2	3dpi	NonN_8
R-MMU-2871809	FCERI mediated Ca+2 mobilization	2/94	27/8846	0.0330098	0.129138	0.0911324	Calm1/Calm2	2	3dpi	NonN_8
R-MMU-445989	TAK1 activates NFkB by phosphorylation and activation of IKKs complex	2/94	27/8846	0.0330098	0.129138	0.0911324	Ubb/Rps27a	2	3dpi	NonN_8
R-MMU-5213460	RIPK1-mediated regulated necrosis	2/94	27/8846	0.0330098	0.129138	0.0911324	Ubb/Rps27a	2	3dpi	NonN_8
R-MMU-5654732	Negative regulation of FGFR3 signaling	2/94	27/8846	0.0330098	0.129138	0.0911324	Ubb/Rps27a	2	3dpi	NonN_8
R-MMU-5675482	Regulation of necroptotic cell death	2/94	27/8846	0.0330098	0.129138	0.0911324	Ubb/Rps27a	2	3dpi	NonN_8
R-MMU-114608	Platelet degranulation	4/94	115/8846	0.0338296	0.129138	0.0911324	Aldoa/Sparc/Calm1/Calm2	4	3dpi	NonN_8
R-MMU-2454202	Fc epsilon receptor (FCERI) signaling	4/94	116/8846	0.0347618	0.129138	0.0911324	Ubb/Calm1/Rps27a/Calm2	4	3dpi	NonN_8
R-MMU-1592230	Mitochondrial biogenesis	2/94	28/8846	0.0353074	0.129138	0.0911324	Atp5j/Atp5j2	2	3dpi	NonN_8
R-MMU-1834949	Cytosolic sensors of pathogen-associated DNA	2/94	28/8846	0.0353074	0.129138	0.0911324	Ubb/Rps27a	2	3dpi	NonN_8
R-MMU-2514859	Inactivation, recovery and regulation of the phototransduction cascade	2/94	28/8846	0.0353074	0.129138	0.0911324	Calm1/Calm2	2	3dpi	NonN_8
R-MMU-445355	Smooth Muscle Contraction	2/94	28/8846	0.0353074	0.129138	0.0911324	Calm1/Calm2	2	3dpi	NonN_8
R-MMU-451326	Activation of kainate receptors upon glutamate binding	2/94	28/8846	0.0353074	0.129138	0.0911324	Calm1/Calm2	2	3dpi	NonN_8
R-MMU-5218920	VEGFR2 mediated vascular permeability	2/94	28/8846	0.0353074	0.129138	0.0911324	Calm1/Calm2	2	3dpi	NonN_8
R-MMU-5357956	TNFR1-induced NFkappaB signaling pathway	2/94	28/8846	0.0353074	0.129138	0.0911324	Ubb/Rps27a	2	3dpi	NonN_8
R-MMU-5689896	Ovarian tumor domain proteases	2/94	28/8846	0.0353074	0.129138	0.0911324	Ubb/Rps27a	2	3dpi	NonN_8
R-MMU-9607240	FLT3 Signaling	2/94	28/8846	0.0353074	0.129138	0.0911324	Ubb/Rps27a	2	3dpi	NonN_8
R-MMU-2500257	Resolution of Sister Chromatid Cohesion	4/94	117/8846	0.0357088	0.129718	0.0915413	Dynll1/Rps27rt/Rps27/Tuba1a	4	3dpi	NonN_8
R-MMU-1632852	Macroautophagy	4/94	118/8846	0.0366707	0.129763	0.0915735	Ubb/Dynll1/Tuba1a/Rps27a	4	3dpi	NonN_8
R-MMU-9612973	Autophagy	4/94	118/8846	0.0366707	0.129763	0.0915735	Ubb/Dynll1/Tuba1a/Rps27a	4	3dpi	NonN_8
R-MMU-1236394	Signaling by ERBB4	2/94	29/8846	0.0376653	0.129763	0.0915735	Ubb/Rps27a	2	3dpi	NonN_8
R-MMU-2514856	The phototransduction cascade	2/94	29/8846	0.0376653	0.129763	0.0915735	Calm1/Calm2	2	3dpi	NonN_8
R-MMU-3769402	Deactivation of the beta-catenin transactivating complex	2/94	29/8846	0.0376653	0.129763	0.0915735	Ubb/Rps27a	2	3dpi	NonN_8
R-MMU-5656169	Termination of translesion DNA synthesis	2/94	29/8846	0.0376653	0.129763	0.0915735	Ubb/Rps27a	2	3dpi	NonN_8
R-MMU-8866652	Synthesis of active ubiquitin: roles of E1 and E2 enzymes	2/94	29/8846	0.0376653	0.129763	0.0915735	Ubb/Rps27a	2	3dpi	NonN_8
R-MMU-917729	Endosomal Sorting Complex Required For Transport (ESCRT)	2/94	29/8846	0.0376653	0.129763	0.0915735	Ubb/Rps27a	2	3dpi	NonN_8
R-MMU-418346	Platelet homeostasis	3/94	70/8846	0.0381543	0.130429	0.0920434	Slc8a3/Calm1/Calm2	3	3dpi	NonN_8
R-MMU-69275	G2/M Transition	5/94	175/8846	0.0383471	0.130429	0.0920434	Hsp90ab1/Ubb/Dynll1/Tuba1a/Rps27a	5	3dpi	NonN_8
R-MMU-76005	Response to elevated platelet cytosolic Ca2+	4/94	120/8846	0.0386392	0.130591	0.0921575	Aldoa/Sparc/Calm1/Calm2	4	3dpi	NonN_8
R-MMU-3858494	Beta-catenin independent WNT signaling	4/94	121/8846	0.0396459	0.131311	0.0926661	Ubb/Calm1/Rps27a/Calm2	4	3dpi	NonN_8
R-MMU-453274	Mitotic G2-G2/M phases	5/94	177/8846	0.0399594	0.131311	0.0926661	Hsp90ab1/Ubb/Dynll1/Tuba1a/Rps27a	5	3dpi	NonN_8
R-MMU-442755	Activation of NMDA receptors and postsynaptic events	2/94	30/8846	0.040082	0.131311	0.0926661	Calm1/Calm2	2	3dpi	NonN_8
R-MMU-5654726	Negative regulation of FGFR1 signaling	2/94	30/8846	0.040082	0.131311	0.0926661	Ubb/Rps27a	2	3dpi	NonN_8
R-MMU-5654733	Negative regulation of FGFR4 signaling	2/94	30/8846	0.040082	0.131311	0.0926661	Ubb/Rps27a	2	3dpi	NonN_8
R-MMU-983231	Factors involved in megakaryocyte development and platelet production	4/94	122/8846	0.0406675	0.132418	0.0934466	Cdc42/Kif26b/H3f3b/Tuba1a	4	3dpi	NonN_8
R-MMU-5696399	Global Genome Nucleotide Excision Repair (GG-NER)	3/94	73/8846	0.0423865	0.136352	0.096223	Actb/Ubb/Rps27a	3	3dpi	NonN_8
R-MMU-6806834	Signaling by MET	3/94	73/8846	0.0423865	0.136352	0.096223	Ubb/Rap1a/Rps27a	3	3dpi	NonN_8
R-MMU-76002	Platelet activation, signaling and aggregation	6/94	241/8846	0.0429335	0.137284	0.0968812	Aldoa/Sparc/Cdc42/Rap1a/Calm1/Calm2	6	3dpi	NonN_8
R-MMU-168638	NOD1/2 Signaling Pathway	2/94	32/8846	0.0450855	0.141621	0.0999418	Ubb/Rps27a	2	3dpi	NonN_8
R-MMU-418990	Adherens junctions interactions	2/94	32/8846	0.0450855	0.141621	0.0999418	Actb/Cdh18	2	3dpi	NonN_8
R-MMU-5654727	Negative regulation of FGFR2 signaling	2/94	32/8846	0.0450855	0.141621	0.0999418	Ubb/Rps27a	2	3dpi	NonN_8
R-MMU-2173793	Transcriptional activity of SMAD2/SMAD3:SMAD4 heterotrimer	2/94	33/8846	0.0476695	0.14546	0.102651	Ubb/Rps27a	2	3dpi	NonN_8
R-MMU-3299685	Detoxification of Reactive Oxygen Species	2/94	33/8846	0.0476695	0.14546	0.102651	Gstp1/Prdx1	2	3dpi	NonN_8
R-MMU-5357905	Regulation of TNFR1 signaling	2/94	33/8846	0.0476695	0.14546	0.102651	Ubb/Rps27a	2	3dpi	NonN_8
R-MMU-5576892	Phase 0 - rapid depolarisation	2/94	33/8846	0.0476695	0.14546	0.102651	Calm1/Calm2	2	3dpi	NonN_8
R-MMU-6783310	Fanconi Anemia Pathway	2/94	33/8846	0.0476695	0.14546	0.102651	Ubb/Rps27a	2	3dpi	NonN_8
R-MMU-2029480	Fcgamma receptor (FCGR) dependent phagocytosis	3/94	77/8846	0.0483807	0.146791	0.10359	Hsp90ab1/Actb/Cdc42	3	3dpi	NonN_8
R-MMU-5673000	RAF activation	2/94	34/8846	0.0503064	0.150076	0.105908	Calm1/Calm2	2	3dpi	NonN_8
R-MMU-6804757	Regulation of TP53 Degradation	2/94	34/8846	0.0503064	0.150076	0.105908	Ubb/Rps27a	2	3dpi	NonN_8
R-MMU-6806003	Regulation of TP53 Expression and Degradation	2/94	34/8846	0.0503064	0.150076	0.105908	Ubb/Rps27a	2	3dpi	NonN_8
R-MMU-112043	PLC beta mediated events	2/94	35/8846	0.0529949	0.154641	0.109129	Calm1/Calm2	2	3dpi	NonN_8
R-MMU-437239	Recycling pathway of L1	2/94	35/8846	0.0529949	0.154641	0.109129	Actb/Tuba1a	2	3dpi	NonN_8
R-MMU-5663213	RHO GTPases Activate WASPs and WAVEs	2/94	35/8846	0.0529949	0.154641	0.109129	Actb/Cdc42	2	3dpi	NonN_8
R-MMU-5689901	Metalloprotease DUBs	2/94	35/8846	0.0529949	0.154641	0.109129	Ubb/Rps27a	2	3dpi	NonN_8
R-MMU-8856828	Clathrin-mediated endocytosis	4/94	134/8846	0.054092	0.156984	0.110783	Actb/Dnajc6/Ubb/Rps27a	4	3dpi	NonN_8
R-MMU-422475	Axon guidance	6/94	256/8846	0.0546642	0.157788	0.11135	Hsp90ab1/Actb/Cdc42/Ubb/Tuba1a/Rps27a	6	3dpi	NonN_8
R-MMU-9675108	Nervous system development	6/94	257/8846	0.0555093	0.158307	0.111717	Hsp90ab1/Actb/Cdc42/Ubb/Tuba1a/Rps27a	6	3dpi	NonN_8
R-MMU-110313	Translesion synthesis by Y family DNA polymerases bypasses lesions on DNA template	2/94	36/8846	0.0557335	0.158307	0.111717	Ubb/Rps27a	2	3dpi	NonN_8
R-MMU-5696400	Dual Incision in GG-NER	2/94	36/8846	0.0557335	0.158307	0.111717	Ubb/Rps27a	2	3dpi	NonN_8
R-MMU-5673001	RAF/MAP kinase cascade	6/94	259/8846	0.0572233	0.161679	0.114096	Actb/Ubb/Rap1a/Calm1/Rps27a/Calm2	6	3dpi	NonN_8
R-MMU-3928662	EPHB-mediated forward signaling	2/94	37/8846	0.058521	0.163614	0.115462	Actb/Cdc42	2	3dpi	NonN_8
R-MMU-5654741	Signaling by FGFR3	2/94	37/8846	0.058521	0.163614	0.115462	Ubb/Rps27a	2	3dpi	NonN_8
R-MMU-5684996	MAPK1/MAPK3 signaling	6/94	265/8846	0.0625562	0.173985	0.12278	Actb/Ubb/Rap1a/Calm1/Rps27a/Calm2	6	3dpi	NonN_8
R-MMU-157118	Signaling by NOTCH	2/94	39/8846	0.0642371	0.175013	0.123506	Ubb/Rps27a	2	3dpi	NonN_8
R-MMU-5654743	Signaling by FGFR4	2/94	39/8846	0.0642371	0.175013	0.123506	Ubb/Rps27a	2	3dpi	NonN_8
R-MMU-5674135	MAP2K and MAPK activation	2/94	39/8846	0.0642371	0.175013	0.123506	Actb/Rap1a	2	3dpi	NonN_8
R-MMU-5696395	Formation of Incision Complex in GG-NER	2/94	39/8846	0.0642371	0.175013	0.123506	Ubb/Rps27a	2	3dpi	NonN_8
R-MMU-112040	G-protein mediated events	2/94	40/8846	0.0671633	0.178434	0.12592	Calm1/Calm2	2	3dpi	NonN_8
R-MMU-190828	Gap junction trafficking	2/94	40/8846	0.0671633	0.178434	0.12592	Actb/Tuba1a	2	3dpi	NonN_8
R-MMU-421270	Cell-cell junction organization	2/94	40/8846	0.0671633	0.178434	0.12592	Actb/Cdh18	2	3dpi	NonN_8
R-MMU-512988	Interleukin-3, Interleukin-5 and GM-CSF signaling	2/94	40/8846	0.0671633	0.178434	0.12592	Ubb/Rps27a	2	3dpi	NonN_8
R-MMU-5675221	Negative regulation of MAPK pathway	2/94	40/8846	0.0671633	0.178434	0.12592	Ubb/Rps27a	2	3dpi	NonN_8
R-MMU-69231	Cyclin D associated events in G1	2/94	41/8846	0.0701331	0.183708	0.129642	Ubb/Rps27a	2	3dpi	NonN_8
R-MMU-69236	G1 Phase	2/94	41/8846	0.0701331	0.183708	0.129642	Ubb/Rps27a	2	3dpi	NonN_8
R-MMU-141424	Amplification of signal from the kinetochores	3/94	90/8846	0.0705244	0.183708	0.129642	Dynll1/Rps27rt/Rps27	3	3dpi	NonN_8
R-MMU-141444	Amplification of signal from unattached kinetochores via a MAD2 inhibitory signal	3/94	90/8846	0.0705244	0.183708	0.129642	Dynll1/Rps27rt/Rps27	3	3dpi	NonN_8
R-MMU-1227986	Signaling by ERBB2	2/94	42/8846	0.0731453	0.186888	0.131886	Ubb/Rps27a	2	3dpi	NonN_8
R-MMU-157858	Gap junction trafficking and regulation	2/94	42/8846	0.0731453	0.186888	0.131886	Actb/Tuba1a	2	3dpi	NonN_8
R-MMU-4086398	Ca2+ pathway	2/94	42/8846	0.0731453	0.186888	0.131886	Calm1/Calm2	2	3dpi	NonN_8
R-MMU-75893	TNF signaling	2/94	42/8846	0.0731453	0.186888	0.131886	Ubb/Rps27a	2	3dpi	NonN_8
R-MMU-5689603	UCH proteinases	3/94	93/8846	0.0761847	0.191034	0.134812	Actb/Ubb/Rps27a	3	3dpi	NonN_8
R-MMU-8848021	Signaling by PTK6	2/94	43/8846	0.0761988	0.191034	0.134812	Ubb/Rps27a	2	3dpi	NonN_8
R-MMU-9006927	Signaling by Non-Receptor Tyrosine Kinases	2/94	43/8846	0.0761988	0.191034	0.134812	Ubb/Rps27a	2	3dpi	NonN_8
R-MMU-9035034	RHOF GTPase cycle	2/94	43/8846	0.0761988	0.191034	0.134812	Actb/Diaph2	2	3dpi	NonN_8
R-MMU-2559582	Senescence-Associated Secretory Phenotype (SASP)	3/94	95/8846	0.0800669	0.199793	0.140993	H3f3b/Ubb/Rps27a	3	3dpi	NonN_8
R-MMU-73893	DNA Damage Bypass	2/94	45/8846	0.0824246	0.20472	0.14447	Ubb/Rps27a	2	3dpi	NonN_8
R-MMU-1483249	Inositol phosphate metabolism	2/94	46/8846	0.0855947	0.210634	0.148644	Calm1/Calm2	2	3dpi	NonN_8
R-MMU-5654736	Signaling by FGFR1	2/94	46/8846	0.0855947	0.210634	0.148644	Ubb/Rps27a	2	3dpi	NonN_8
R-MMU-5696398	Nucleotide Excision Repair	3/94	99/8846	0.0880844	0.215766	0.152266	Actb/Ubb/Rps27a	3	3dpi	NonN_8
R-MMU-5218859	Regulated Necrosis	2/94	47/8846	0.0888013	0.216529	0.152804	Ubb/Rps27a	2	3dpi	NonN_8
R-MMU-198933	Immunoregulatory interactions between a Lymphoid and a non-Lymphoid cell	3/94	100/8846	0.0901402	0.217805	0.153704	Cd81/B2m/Ifitm3	3	3dpi	NonN_8
R-MMU-425393	Transport of inorganic cations/anions and amino acids/oligopeptides	3/94	100/8846	0.0901402	0.217805	0.153704	Slc8a3/Calm1/Calm2	3	3dpi	NonN_8
R-MMU-6811436	COPI-independent Golgi-to-ER retrograde traffic	2/94	48/8846	0.0920433	0.220409	0.155542	Dynll1/Tuba1a	2	3dpi	NonN_8
R-MMU-8866654	E3 ubiquitin ligases ubiquitinate target proteins	2/94	48/8846	0.0920433	0.220409	0.155542	Ubb/Rps27a	2	3dpi	NonN_8
R-MMU-6781823	Formation of TC-NER Pre-Incision Complex	2/94	50/8846	0.0986295	0.228793	0.161458	Ubb/Rps27a	2	3dpi	NonN_8
R-MMU-75815	Ubiquitin-dependent degradation of Cyclin D	2/94	50/8846	0.0986295	0.228793	0.161458	Ubb/Rps27a	2	3dpi	NonN_8
R-MMU-397014	Muscle contraction	4/94	166/8846	0.100094	0.228793	0.161458	Atp1a2/Slc8a3/Calm1/Calm2	4	3dpi	NonN_8
R-MMU-5610787	Hedgehog 'off' state	3/94	105/8846	0.100717	0.228793	0.161458	Ubb/Tuba1a/Rps27a	3	3dpi	NonN_8
R-MMU-112308	Presynaptic depolarization and calcium channel opening	1/94	10/8846	0.101372	0.228793	0.161458	Cacnb4	1	3dpi	NonN_8
R-MMU-73614	Pyrimidine salvage	1/94	10/8846	0.101372	0.228793	0.161458	Upp2	1	3dpi	NonN_8
R-MMU-844456	The NLRP3 inflammasome	1/94	10/8846	0.101372	0.228793	0.161458	Hsp90ab1	1	3dpi	NonN_8
R-MMU-8964058	HDL remodeling	1/94	10/8846	0.101372	0.228793	0.161458	Pltp	1	3dpi	NonN_8
R-MMU-349425	Autodegradation of the E3 ubiquitin ligase COP1	2/94	51/8846	0.101971	0.228793	0.161458	Ubb/Rps27a	2	3dpi	NonN_8
R-MMU-448424	Interleukin-17 signaling	2/94	51/8846	0.101971	0.228793	0.161458	Ubb/Rps27a	2	3dpi	NonN_8
R-MMU-450294	MAP kinase activation	2/94	51/8846	0.101971	0.228793	0.161458	Ubb/Rps27a	2	3dpi	NonN_8
R-MMU-69601	Ubiquitin Mediated Degradation of Phosphorylated Cdc25A	2/94	51/8846	0.101971	0.228793	0.161458	Ubb/Rps27a	2	3dpi	NonN_8
R-MMU-69610	p53-Independent DNA Damage Response	2/94	51/8846	0.101971	0.228793	0.161458	Ubb/Rps27a	2	3dpi	NonN_8
R-MMU-69613	p53-Independent G1/S DNA damage checkpoint	2/94	51/8846	0.101971	0.228793	0.161458	Ubb/Rps27a	2	3dpi	NonN_8
R-MMU-8939902	Regulation of RUNX2 expression and activity	2/94	51/8846	0.101971	0.228793	0.161458	Ubb/Rps27a	2	3dpi	NonN_8
R-MMU-2559580	Oxidative Stress Induced Senescence	3/94	107/8846	0.105082	0.231498	0.163367	H3f3b/Ubb/Rps27a	3	3dpi	NonN_8
R-MMU-69618	Mitotic Spindle Checkpoint	3/94	107/8846	0.105082	0.231498	0.163367	Dynll1/Rps27rt/Rps27	3	3dpi	NonN_8
R-MMU-8932339	ROS sensing by NFE2L2	2/94	52/8846	0.105345	0.231498	0.163367	Ubb/Rps27a	2	3dpi	NonN_8
R-MMU-8941858	Regulation of RUNX3 expression and activity	2/94	52/8846	0.105345	0.231498	0.163367	Ubb/Rps27a	2	3dpi	NonN_8
R-MMU-983189	Kinesins	2/94	52/8846	0.105345	0.231498	0.163367	Kif26b/Tuba1a	2	3dpi	NonN_8
R-MMU-170834	Signaling by TGF-beta Receptor Complex	2/94	53/8846	0.108748	0.236062	0.166588	Ubb/Rps27a	2	3dpi	NonN_8
R-MMU-450408	AUF1 (hnRNP D0) binds and destabilizes mRNA	2/94	53/8846	0.108748	0.236062	0.166588	Ubb/Rps27a	2	3dpi	NonN_8
R-MMU-8854050	FBXL7 down-regulates AURKA during mitotic entry and in early mitosis	2/94	53/8846	0.108748	0.236062	0.166588	Ubb/Rps27a	2	3dpi	NonN_8
R-MMU-389359	CD28 dependent Vav1 pathway	1/94	11/8846	0.110932	0.237902	0.167887	Cdc42	1	3dpi	NonN_8
R-MMU-418885	DCC mediated attractive signaling	1/94	11/8846	0.110932	0.237902	0.167887	Cdc42	1	3dpi	NonN_8
R-MMU-73621	Pyrimidine catabolism	1/94	11/8846	0.110932	0.237902	0.167887	Upp2	1	3dpi	NonN_8
R-MMU-4641257	Degradation of AXIN	2/94	54/8846	0.11218	0.239617	0.169097	Ubb/Rps27a	2	3dpi	NonN_8
R-MMU-112316	Neuronal System	6/94	311/8846	0.112902	0.240199	0.169507	Cacnb4/Stxbp1/Ntrk3/Kcnb2/Calm1/Calm2	6	3dpi	NonN_8
R-MMU-5610780	Degradation of GLI1 by the proteasome	2/94	55/8846	0.115641	0.242165	0.170895	Ubb/Rps27a	2	3dpi	NonN_8
R-MMU-5620924	Intraflagellar transport	2/94	55/8846	0.115641	0.242165	0.170895	Dynll1/Tuba1a	2	3dpi	NonN_8
R-MMU-6799198	Complex I biogenesis	2/94	55/8846	0.115641	0.242165	0.170895	Ndufa7/Ndufc2	2	3dpi	NonN_8
R-MMU-69541	Stabilization of p53	2/94	55/8846	0.115641	0.242165	0.170895	Ubb/Rps27a	2	3dpi	NonN_8
R-MMU-4641258	Degradation of DVL	2/94	56/8846	0.119129	0.245616	0.173331	Ubb/Rps27a	2	3dpi	NonN_8
R-MMU-5607761	Dectin-1 mediated noncanonical NF-kB signaling	2/94	56/8846	0.119129	0.245616	0.173331	Ubb/Rps27a	2	3dpi	NonN_8
R-MMU-5610785	GLI3 is processed to GLI3R by the proteasome	2/94	56/8846	0.119129	0.245616	0.173331	Ubb/Rps27a	2	3dpi	NonN_8
R-MMU-5676590	NIK-->noncanonical NF-kB signaling	2/94	56/8846	0.119129	0.245616	0.173331	Ubb/Rps27a	2	3dpi	NonN_8
R-MMU-170968	Frs2-mediated activation	1/94	12/8846	0.120391	0.246317	0.173825	Rap1a	1	3dpi	NonN_8
R-MMU-2162123	Synthesis of Prostaglandins (PG) and Thromboxanes (TX)	1/94	12/8846	0.120391	0.246317	0.173825	Ptgds	1	3dpi	NonN_8
R-MMU-2142753	Arachidonic acid metabolism	2/94	57/8846	0.122643	0.248073	0.175064	Ptgds/Gpx4	2	3dpi	NonN_8
R-MMU-5685942	HDR through Homologous Recombination (HRR)	2/94	57/8846	0.122643	0.248073	0.175064	Ubb/Rps27a	2	3dpi	NonN_8
R-MMU-68827	CDT1 association with the CDC6:ORC:origin complex	2/94	57/8846	0.122643	0.248073	0.175064	Ubb/Rps27a	2	3dpi	NonN_8
R-MMU-187577	SCF(Skp2)-mediated degradation of p27/p21	2/94	59/8846	0.129746	0.259153	0.182884	Ubb/Rps27a	2	3dpi	NonN_8
R-MMU-6782210	Gap-filling DNA repair synthesis and ligation in TC-NER	2/94	59/8846	0.129746	0.259153	0.182884	Ubb/Rps27a	2	3dpi	NonN_8
R-MMU-3371568	Attenuation phase	1/94	13/8846	0.129751	0.259153	0.182884	Hsp90ab1	1	3dpi	NonN_8
R-MMU-8939211	ESR-mediated signaling	4/94	183/8846	0.130062	0.259153	0.182884	Hsp90ab1/H3f3b/Calm1/Calm2	4	3dpi	NonN_8
R-MMU-6782135	Dual incision in TC-NER	2/94	60/8846	0.133333	0.263703	0.186094	Ubb/Rps27a	2	3dpi	NonN_8
R-MMU-9707587	Regulation of HMOX1 expression and activity	2/94	60/8846	0.133333	0.263703	0.186094	Ubb/Rps27a	2	3dpi	NonN_8
R-MMU-4608870	Asymmetric localization of PCP proteins	2/94	61/8846	0.136943	0.268002	0.189128	Ubb/Rps27a	2	3dpi	NonN_8
R-MMU-5358346	Hedgehog ligand biogenesis	2/94	61/8846	0.136943	0.268002	0.189128	Ubb/Rps27a	2	3dpi	NonN_8
R-MMU-169893	Prolonged ERK activation events	1/94	14/8846	0.139012	0.268002	0.189128	Rap1a	1	3dpi	NonN_8
R-MMU-392517	Rap1 signalling	1/94	14/8846	0.139012	0.268002	0.189128	Rap1a	1	3dpi	NonN_8
R-MMU-399954	Sema3A PAK dependent Axon repulsion	1/94	14/8846	0.139012	0.268002	0.189128	Hsp90ab1	1	3dpi	NonN_8
R-MMU-622312	Inflammasomes	1/94	14/8846	0.139012	0.268002	0.189128	Hsp90ab1	1	3dpi	NonN_8
R-MMU-112315	Transmission across Chemical Synapses	4/94	188/8846	0.139522	0.268002	0.189128	Cacnb4/Stxbp1/Calm1/Calm2	4	3dpi	NonN_8
R-MMU-68877	Mitotic Prometaphase	4/94	188/8846	0.139522	0.268002	0.189128	Dynll1/Rps27rt/Rps27/Tuba1a	4	3dpi	NonN_8
R-MMU-1169091	Activation of NF-kappaB in B cells	2/94	62/8846	0.140574	0.268095	0.189194	Ubb/Rps27a	2	3dpi	NonN_8
R-MMU-8878166	Transcriptional regulation by RUNX2	2/94	62/8846	0.140574	0.268095	0.189194	Ubb/Rps27a	2	3dpi	NonN_8
R-MMU-168164	Toll Like Receptor 3 (TLR3) Cascade	2/94	63/8846	0.144227	0.268352	0.189375	Ubb/Rps27a	2	3dpi	NonN_8
R-MMU-174084	Autodegradation of Cdh1 by Cdh1:APC/C	2/94	63/8846	0.144227	0.268352	0.189375	Ubb/Rps27a	2	3dpi	NonN_8
R-MMU-373760	L1CAM interactions	2/94	63/8846	0.144227	0.268352	0.189375	Actb/Tuba1a	2	3dpi	NonN_8
R-MMU-5693565	Recruitment and ATM-mediated phosphorylation of repair and signaling proteins at DNA double strand breaks	2/94	63/8846	0.144227	0.268352	0.189375	Ubb/Rps27a	2	3dpi	NonN_8
R-MMU-69563	p53-Dependent G1 DNA Damage Response	2/94	63/8846	0.144227	0.268352	0.189375	Ubb/Rps27a	2	3dpi	NonN_8
R-MMU-69580	p53-Dependent G1/S DNA damage checkpoint	2/94	63/8846	0.144227	0.268352	0.189375	Ubb/Rps27a	2	3dpi	NonN_8
R-MMU-9033241	Peroxisomal protein import	2/94	63/8846	0.144227	0.268352	0.189375	Ubb/Rps27a	2	3dpi	NonN_8
R-MMU-8856688	Golgi-to-ER retrograde transport	3/94	124/8846	0.144974	0.268806	0.189695	Kif26b/Dynll1/Tuba1a	3	3dpi	NonN_8
R-MMU-5693606	DNA Double Strand Break Response	2/94	64/8846	0.147899	0.269832	0.190419	Ubb/Rps27a	2	3dpi	NonN_8
R-MMU-264642	Acetylcholine Neurotransmitter Release Cycle	1/94	15/8846	0.148175	0.269832	0.190419	Stxbp1	1	3dpi	NonN_8
R-MMU-354194	GRB2:SOS provides linkage to MAPK signaling for Integrins	1/94	15/8846	0.148175	0.269832	0.190419	Rap1a	1	3dpi	NonN_8
R-MMU-372708	p130Cas linkage to MAPK signaling for integrins	1/94	15/8846	0.148175	0.269832	0.190419	Rap1a	1	3dpi	NonN_8
R-MMU-168142	Toll Like Receptor 10 (TLR10) Cascade	2/94	65/8846	0.151591	0.269832	0.190419	Ubb/Rps27a	2	3dpi	NonN_8
R-MMU-168176	Toll Like Receptor 5 (TLR5) Cascade	2/94	65/8846	0.151591	0.269832	0.190419	Ubb/Rps27a	2	3dpi	NonN_8
R-MMU-204998	Cell death signalling via NRAGE, NRIF and NADE	2/94	65/8846	0.151591	0.269832	0.190419	Ubb/Rps27a	2	3dpi	NonN_8
R-MMU-2682334	EPH-Ephrin signaling	2/94	65/8846	0.151591	0.269832	0.190419	Actb/Cdc42	2	3dpi	NonN_8
R-MMU-446728	Cell junction organization	2/94	65/8846	0.151591	0.269832	0.190419	Actb/Cdh18	2	3dpi	NonN_8
R-MMU-69615	G1/S DNA Damage Checkpoints	2/94	65/8846	0.151591	0.269832	0.190419	Ubb/Rps27a	2	3dpi	NonN_8
R-MMU-8939236	RUNX1 regulates transcription of genes involved in differentiation of HSCs	2/94	65/8846	0.151591	0.269832	0.190419	Ubb/Rps27a	2	3dpi	NonN_8
R-MMU-975871	MyD88 cascade initiated on plasma membrane	2/94	65/8846	0.151591	0.269832	0.190419	Ubb/Rps27a	2	3dpi	NonN_8
R-MMU-5357801	Programmed Cell Death	3/94	127/8846	0.152478	0.270133	0.190632	Ubb/Dynll1/Rps27a	3	3dpi	NonN_8
R-MMU-166058	MyD88:MAL(TIRAP) cascade initiated on plasma membrane	2/94	66/8846	0.155301	0.270133	0.190632	Ubb/Rps27a	2	3dpi	NonN_8
R-MMU-168179	Toll Like Receptor TLR1:TLR2 Cascade	2/94	66/8846	0.155301	0.270133	0.190632	Ubb/Rps27a	2	3dpi	NonN_8
R-MMU-168188	Toll Like Receptor TLR6:TLR2 Cascade	2/94	66/8846	0.155301	0.270133	0.190632	Ubb/Rps27a	2	3dpi	NonN_8
R-MMU-181438	Toll Like Receptor 2 (TLR2) Cascade	2/94	66/8846	0.155301	0.270133	0.190632	Ubb/Rps27a	2	3dpi	NonN_8
R-MMU-5658442	Regulation of RAS by GAPs	2/94	66/8846	0.155301	0.270133	0.190632	Ubb/Rps27a	2	3dpi	NonN_8
R-MMU-68867	Assembly of the pre-replicative complex	2/94	66/8846	0.155301	0.270133	0.190632	Ubb/Rps27a	2	3dpi	NonN_8
R-MMU-190840	Microtubule-dependent trafficking of connexons from Golgi to the plasma membrane	1/94	16/8846	0.157242	0.271947	0.191912	Tuba1a	1	3dpi	NonN_8
R-MMU-174154	APC/C:Cdc20 mediated degradation of Securin	2/94	67/8846	0.159029	0.271947	0.191912	Ubb/Rps27a	2	3dpi	NonN_8
R-MMU-5654738	Signaling by FGFR2	2/94	67/8846	0.159029	0.271947	0.191912	Ubb/Rps27a	2	3dpi	NonN_8
R-MMU-8948751	Regulation of PTEN stability and activity	2/94	67/8846	0.159029	0.271947	0.191912	Ubb/Rps27a	2	3dpi	NonN_8
R-MMU-9009391	Extra-nuclear estrogen signaling	2/94	67/8846	0.159029	0.271947	0.191912	Calm1/Calm2	2	3dpi	NonN_8
R-MMU-69620	Cell Cycle Checkpoints	5/94	270/8846	0.1594	0.271947	0.191912	Ubb/Dynll1/Rps27rt/Rps27/Rps27a	5	3dpi	NonN_8
R-MMU-111885	Opioid Signalling	2/94	68/8846	0.162773	0.273628	0.193098	Calm1/Calm2	2	3dpi	NonN_8
R-MMU-380259	Loss of Nlp from mitotic centrosomes	2/94	68/8846	0.162773	0.273628	0.193098	Dynll1/Tuba1a	2	3dpi	NonN_8
R-MMU-380284	Loss of proteins required for interphase microtubule organization from the centrosome	2/94	68/8846	0.162773	0.273628	0.193098	Dynll1/Tuba1a	2	3dpi	NonN_8
R-MMU-8852135	Protein ubiquitination	2/94	68/8846	0.162773	0.273628	0.193098	Ubb/Rps27a	2	3dpi	NonN_8
R-MMU-190872	Transport of connexons to the plasma membrane	1/94	17/8846	0.166214	0.273628	0.193098	Tuba1a	1	3dpi	NonN_8
R-MMU-201556	Signaling by ALK	1/94	17/8846	0.166214	0.273628	0.193098	Ptn	1	3dpi	NonN_8
R-MMU-446353	Cell-extracellular matrix interactions	1/94	17/8846	0.166214	0.273628	0.193098	Actb	1	3dpi	NonN_8
R-MMU-8964616	G beta:gamma signalling through CDC42	1/94	17/8846	0.166214	0.273628	0.193098	Cdc42	1	3dpi	NonN_8
R-MMU-9018677	Biosynthesis of DHA-derived SPMs	1/94	17/8846	0.166214	0.273628	0.193098	Gpx4	1	3dpi	NonN_8
R-MMU-68949	Orc1 removal from chromatin	2/94	69/8846	0.166534	0.273628	0.193098	Ubb/Rps27a	2	3dpi	NonN_8
R-MMU-69202	Cyclin E associated events during G1/S transition	2/94	69/8846	0.166534	0.273628	0.193098	Ubb/Rps27a	2	3dpi	NonN_8
R-MMU-975138	TRAF6 mediated induction of NFkB and MAP kinases upon TLR7/8 or 9 activation	2/94	69/8846	0.166534	0.273628	0.193098	Ubb/Rps27a	2	3dpi	NonN_8
R-MMU-6781827	Transcription-Coupled Nucleotide Excision Repair (TC-NER)	2/94	70/8846	0.17031	0.27812	0.196269	Ubb/Rps27a	2	3dpi	NonN_8
R-MMU-975155	MyD88 dependent cascade initiated on endosome	2/94	70/8846	0.17031	0.27812	0.196269	Ubb/Rps27a	2	3dpi	NonN_8
R-MMU-166520	Signaling by NTRKs	2/94	71/8846	0.1741	0.27827	0.196374	Ntrk3/Rap1a	2	3dpi	NonN_8
R-MMU-168181	Toll Like Receptor 7/8 (TLR7/8) Cascade	2/94	71/8846	0.1741	0.27827	0.196374	Ubb/Rps27a	2	3dpi	NonN_8
R-MMU-69656	Cyclin A:Cdk2-associated events at S phase entry	2/94	71/8846	0.1741	0.27827	0.196374	Ubb/Rps27a	2	3dpi	NonN_8
R-MMU-8854518	AURKA Activation by TPX2	2/94	71/8846	0.1741	0.27827	0.196374	Dynll1/Tuba1a	2	3dpi	NonN_8
R-MMU-114452	Activation of BH3-only proteins	1/94	18/8846	0.175091	0.27827	0.196374	Dynll1	1	3dpi	NonN_8
R-MMU-181429	Serotonin Neurotransmitter Release Cycle	1/94	18/8846	0.175091	0.27827	0.196374	Stxbp1	1	3dpi	NonN_8
R-MMU-181430	Norepinephrine Neurotransmitter Release Cycle	1/94	18/8846	0.175091	0.27827	0.196374	Stxbp1	1	3dpi	NonN_8
R-MMU-888590	GABA synthesis, release, reuptake and degradation	1/94	18/8846	0.175091	0.27827	0.196374	Stxbp1	1	3dpi	NonN_8
R-MMU-9018678	Biosynthesis of specialized proresolving mediators (SPMs)	1/94	18/8846	0.175091	0.27827	0.196374	Gpx4	1	3dpi	NonN_8
R-MMU-5358351	Signaling by Hedgehog	3/94	136/8846	0.175696	0.278403	0.196468	Ubb/Tuba1a/Rps27a	3	3dpi	NonN_8
R-MMU-174184	Cdc20:Phospho-APC/C mediated degradation of Cyclin A	2/94	72/8846	0.177904	0.280239	0.197763	Ubb/Rps27a	2	3dpi	NonN_8
R-MMU-69017	CDK-mediated phosphorylation and removal of Cdc6	2/94	72/8846	0.177904	0.280239	0.197763	Ubb/Rps27a	2	3dpi	NonN_8
R-MMU-174178	APC/C:Cdh1 mediated degradation of Cdc20 and other APC/C:Cdh1 targeted proteins in late mitosis/early G1	2/94	73/8846	0.181722	0.284573	0.200822	Ubb/Rps27a	2	3dpi	NonN_8
R-MMU-179419	APC:Cdc20 mediated degradation of cell cycle proteins prior to satisfation of the cell cycle checkpoint	2/94	73/8846	0.181722	0.284573	0.200822	Ubb/Rps27a	2	3dpi	NonN_8
R-MMU-388844	Receptor-type tyrosine-protein phosphatases	1/94	19/8846	0.183875	0.287103	0.202607	Ntrk3	1	3dpi	NonN_8
R-MMU-168138	Toll Like Receptor 9 (TLR9) Cascade	2/94	75/8846	0.189393	0.293147	0.206873	Ubb/Rps27a	2	3dpi	NonN_8
R-MMU-176409	APC/C:Cdc20 mediated degradation of mitotic proteins	2/94	75/8846	0.189393	0.293147	0.206873	Ubb/Rps27a	2	3dpi	NonN_8
R-MMU-2871837	FCERI mediated NF-kB activation	2/94	75/8846	0.189393	0.293147	0.206873	Ubb/Rps27a	2	3dpi	NonN_8
R-MMU-176814	Activation of APC/C and APC/C:Cdc20 mediated degradation of mitotic proteins	2/94	76/8846	0.193246	0.297387	0.209865	Ubb/Rps27a	2	3dpi	NonN_8
R-MMU-195253	Degradation of beta-catenin by the destruction complex	2/94	76/8846	0.193246	0.297387	0.209865	Ubb/Rps27a	2	3dpi	NonN_8
R-MMU-8951664	Neddylation	4/94	216/8846	0.197102	0.299875	0.211621	Epas1/Elob/Ubb/Rps27a	4	3dpi	NonN_8
R-MMU-380270	Recruitment of mitotic centrosome proteins and complexes	2/94	77/8846	0.197109	0.299875	0.211621	Dynll1/Tuba1a	2	3dpi	NonN_8
R-MMU-380287	Centrosome maturation	2/94	77/8846	0.197109	0.299875	0.211621	Dynll1/Tuba1a	2	3dpi	NonN_8
R-MMU-8878159	Transcriptional regulation by RUNX3	2/94	77/8846	0.197109	0.299875	0.211621	Ubb/Rps27a	2	3dpi	NonN_8
R-MMU-9013418	RHOBTB2 GTPase cycle	1/94	21/8846	0.201165	0.305177	0.215362	Hsp90ab1	1	3dpi	NonN_8
R-MMU-190236	Signaling by FGFR	2/94	79/8846	0.204864	0.308161	0.217468	Ubb/Rps27a	2	3dpi	NonN_8
R-MMU-6804756	Regulation of TP53 Activity through Phosphorylation	2/94	79/8846	0.204864	0.308161	0.217468	Ubb/Rps27a	2	3dpi	NonN_8
R-MMU-9006936	Signaling by TGFB family members	2/94	79/8846	0.204864	0.308161	0.217468	Ubb/Rps27a	2	3dpi	NonN_8
R-MMU-193704	p75 NTR receptor-mediated signalling	2/94	80/8846	0.208754	0.312254	0.220357	Ubb/Rps27a	2	3dpi	NonN_8
R-MMU-5632684	Hedgehog 'on' state	2/94	80/8846	0.208754	0.312254	0.220357	Ubb/Rps27a	2	3dpi	NonN_8
R-MMU-3371571	HSF1-dependent transactivation	1/94	22/8846	0.209674	0.312754	0.22071	Hsp90ab1	1	3dpi	NonN_8
R-MMU-1852241	Organelle biogenesis and maintenance	4/94	222/8846	0.210306	0.312823	0.220758	Dynll1/Atp5j/Tuba1a/Atp5j2	4	3dpi	NonN_8
R-MMU-69002	DNA Replication Pre-Initiation	2/94	81/8846	0.212652	0.315434	0.222601	Ubb/Rps27a	2	3dpi	NonN_8
R-MMU-166166	MyD88-independent TLR4 cascade	2/94	82/8846	0.216558	0.317335	0.223942	Ubb/Rps27a	2	3dpi	NonN_8
R-MMU-450531	Regulation of mRNA stability by proteins that bind AU-rich elements	2/94	82/8846	0.216558	0.317335	0.223942	Ubb/Rps27a	2	3dpi	NonN_8
R-MMU-937061	TRIF(TICAM1)-mediated TLR4 signaling	2/94	82/8846	0.216558	0.317335	0.223942	Ubb/Rps27a	2	3dpi	NonN_8
R-MMU-68886	M Phase	6/94	380/8846	0.21658	0.317335	0.223942	Ubb/Dynll1/Rps27rt/Rps27/Tuba1a/Rps27a	6	3dpi	NonN_8
R-MMU-212676	Dopamine Neurotransmitter Release Cycle	1/94	23/8846	0.218093	0.317335	0.223942	Stxbp1	1	3dpi	NonN_8
R-MMU-373752	Netrin-1 signaling	1/94	23/8846	0.218093	0.317335	0.223942	Cdc42	1	3dpi	NonN_8
R-MMU-8956321	Nucleotide salvage	1/94	23/8846	0.218093	0.317335	0.223942	Upp2	1	3dpi	NonN_8
R-MMU-425407	SLC-mediated transmembrane transport	4/94	226/8846	0.219248	0.318149	0.224516	Bsg/Slc8a3/Calm1/Calm2	4	3dpi	NonN_8
R-MMU-195721	Signaling by WNT	4/94	227/8846	0.2215	0.320545	0.226208	Ubb/Calm1/Rps27a/Calm2	4	3dpi	NonN_8
R-MMU-174143	APC/C-mediated degradation of cell cycle proteins	2/94	84/8846	0.224389	0.322107	0.22731	Ubb/Rps27a	2	3dpi	NonN_8
R-MMU-202424	Downstream TCR signaling	2/94	84/8846	0.224389	0.322107	0.22731	Ubb/Rps27a	2	3dpi	NonN_8
R-MMU-453276	Regulation of mitotic cell cycle	2/94	84/8846	0.224389	0.322107	0.22731	Ubb/Rps27a	2	3dpi	NonN_8
R-MMU-210500	Glutamate Neurotransmitter Release Cycle	1/94	24/8846	0.226424	0.324156	0.228756	Stxbp1	1	3dpi	NonN_8
R-MMU-1500931	Cell-Cell communication	2/94	85/8846	0.228313	0.325987	0.230048	Actb/Cdh18	2	3dpi	NonN_8
R-MMU-4086400	PCP/CE pathway	2/94	86/8846	0.232242	0.330701	0.233375	Ubb/Rps27a	2	3dpi	NonN_8
R-MMU-9006931	Signaling by Nuclear Receptors	4/94	232/8846	0.232853	0.330701	0.233375	Hsp90ab1/H3f3b/Calm1/Calm2	4	3dpi	NonN_8
R-MMU-525793	Myogenesis	1/94	25/8846	0.234666	0.332392	0.234568	Cdc42	1	3dpi	NonN_8
R-MMU-2187338	Visual phototransduction	2/94	87/8846	0.236176	0.333645	0.235452	Calm1/Calm2	2	3dpi	NonN_8
R-MMU-380320	Recruitment of NuMA to mitotic centrosomes	2/94	88/8846	0.240113	0.338313	0.238746	Dynll1/Tuba1a	2	3dpi	NonN_8
R-MMU-1236977	Endosomal/Vacuolar pathway	1/94	26/8846	0.242822	0.338556	0.238918	B2m	1	3dpi	NonN_8
R-MMU-187687	Signalling to ERKs	1/94	26/8846	0.242822	0.338556	0.238918	Rap1a	1	3dpi	NonN_8
R-MMU-77387	Insulin receptor recycling	1/94	26/8846	0.242822	0.338556	0.238918	Atp6v0c	1	3dpi	NonN_8
R-MMU-8963899	Plasma lipoprotein remodeling	1/94	26/8846	0.242822	0.338556	0.238918	Pltp	1	3dpi	NonN_8
R-MMU-69052	Switching of origins to a post-replicative state	2/94	89/8846	0.244054	0.339388	0.239505	Ubb/Rps27a	2	3dpi	NonN_8
R-MMU-2559583	Cellular Senescence	3/94	162/8846	0.24733	0.341317	0.240866	H3f3b/Ubb/Rps27a	3	3dpi	NonN_8
R-MMU-5250913	Positive epigenetic regulation of rRNA expression	2/94	90/8846	0.247998	0.341317	0.240866	Actb/H3f3b	2	3dpi	NonN_8
R-MMU-5250924	B-WICH complex positively regulates rRNA expression	2/94	90/8846	0.247998	0.341317	0.240866	Actb/H3f3b	2	3dpi	NonN_8
R-MMU-6807878	COPI-mediated anterograde transport	2/94	90/8846	0.247998	0.341317	0.240866	Dynll1/Tuba1a	2	3dpi	NonN_8
R-MMU-354192	Integrin signaling	1/94	27/8846	0.250892	0.34265	0.241807	Rap1a	1	3dpi	NonN_8
R-MMU-8955332	Carboxyterminal post-translational modifications of tubulin	1/94	27/8846	0.250892	0.34265	0.241807	Tuba1a	1	3dpi	NonN_8
R-MMU-9668328	Sealing of the nuclear envelope (NE) by ESCRT-III	1/94	27/8846	0.250892	0.34265	0.241807	Tuba1a	1	3dpi	NonN_8
R-MMU-6811434	COPI-dependent Golgi-to-ER retrograde traffic	2/94	91/8846	0.251944	0.34321	0.242202	Kif26b/Tuba1a	2	3dpi	NonN_8
R-MMU-70268	Pyruvate metabolism	1/94	28/8846	0.258876	0.351756	0.248233	Bsg	1	3dpi	NonN_8
R-MMU-9020702	Interleukin-1 signaling	2/94	94/8846	0.263793	0.357526	0.252305	Ubb/Rps27a	2	3dpi	NonN_8
R-MMU-2022928	HS-GAG biosynthesis	1/94	29/8846	0.266777	0.359234	0.25351	Hs3st4	1	3dpi	NonN_8
R-MMU-397795	G-protein beta:gamma signalling	1/94	29/8846	0.266777	0.359234	0.25351	Cdc42	1	3dpi	NonN_8
R-MMU-5620912	Anchoring of the basal body to the plasma membrane	2/94	95/8846	0.267744	0.359234	0.25351	Dynll1/Tuba1a	2	3dpi	NonN_8
R-MMU-5668541	TNFR2 non-canonical NF-kB pathway	2/94	95/8846	0.267744	0.359234	0.25351	Ubb/Rps27a	2	3dpi	NonN_8
R-MMU-8856825	Cargo recognition for clathrin-mediated endocytosis	2/94	96/8846	0.271695	0.363622	0.256607	Ubb/Rps27a	2	3dpi	NonN_8
R-MMU-9006925	Intracellular signaling by second messengers	4/94	249/8846	0.27244	0.363708	0.256667	Ubb/Calm1/Rps27a/Calm2	4	3dpi	NonN_8
R-MMU-69278	Cell Cycle, Mitotic	7/94	496/8846	0.274389	0.364759	0.257409	Hsp90ab1/Ubb/Dynll1/Rps27rt/Rps27/Tuba1a/Rps27a	7	3dpi	NonN_8
R-MMU-381676	Glucagon-like Peptide-1 (GLP1) regulates insulin secretion	1/94	30/8846	0.274594	0.364759	0.257409	Rap1a	1	3dpi	NonN_8
R-MMU-166016	Toll Like Receptor 4 (TLR4) Cascade	2/94	97/8846	0.275646	0.365248	0.257754	Ubb/Rps27a	2	3dpi	NonN_8
R-MMU-917977	Transferrin endocytosis and recycling	1/94	31/8846	0.282328	0.373176	0.263349	Atp6v0c	1	3dpi	NonN_8
R-MMU-382556	ABC-family proteins mediated transport	2/94	99/8846	0.283544	0.373859	0.263831	Ubb/Rps27a	2	3dpi	NonN_8
R-MMU-446203	Asparagine N-linked glycosylation	4/94	254/8846	0.284316	0.373953	0.263898	Ubb/Dynll1/Tuba1a/Rps27a	4	3dpi	NonN_8
R-MMU-190861	Gap junction assembly	1/94	32/8846	0.289981	0.37753	0.266422	Tuba1a	1	3dpi	NonN_8
R-MMU-389356	CD28 co-stimulation	1/94	32/8846	0.289981	0.37753	0.266422	Cdc42	1	3dpi	NonN_8
R-MMU-9706574	RHOBTB GTPase Cycle	1/94	32/8846	0.289981	0.37753	0.266422	Hsp90ab1	1	3dpi	NonN_8
R-MMU-977606	Regulation of Complement cascade	1/94	32/8846	0.289981	0.37753	0.266422	Cd81	1	3dpi	NonN_8
R-MMU-6811442	Intra-Golgi and retrograde Golgi-to-ER traffic	3/94	177/8846	0.290571	0.37753	0.266422	Kif26b/Dynll1/Tuba1a	3	3dpi	NonN_8
R-MMU-202403	TCR signaling	2/94	102/8846	0.295379	0.380996	0.268868	Ubb/Rps27a	2	3dpi	NonN_8
R-MMU-69206	G1/S Transition	2/94	102/8846	0.295379	0.380996	0.268868	Ubb/Rps27a	2	3dpi	NonN_8
R-MMU-9609507	Protein localization	2/94	102/8846	0.295379	0.380996	0.268868	Ubb/Rps27a	2	3dpi	NonN_8
R-MMU-156590	Glutathione conjugation	1/94	33/8846	0.297554	0.381956	0.269545	Gstp1	1	3dpi	NonN_8
R-MMU-432720	Lysosome Vesicle Biogenesis	1/94	33/8846	0.297554	0.381956	0.269545	Dnajc6	1	3dpi	NonN_8
R-MMU-71387	Metabolism of carbohydrates	4/94	262/8846	0.30348	0.386923	0.27305	Aldoa/Hs3st4/Calm1/Calm2	4	3dpi	NonN_8
R-MMU-114604	GPVI-mediated activation cascade	1/94	34/8846	0.305046	0.386923	0.27305	Cdc42	1	3dpi	NonN_8
R-MMU-2173782	Binding and Uptake of Ligands by Scavenger Receptors	1/94	34/8846	0.305046	0.386923	0.27305	Sparc	1	3dpi	NonN_8
R-MMU-70263	Gluconeogenesis	1/94	34/8846	0.305046	0.386923	0.27305	Aldoa	1	3dpi	NonN_8
R-MMU-9013424	RHOV GTPase cycle	1/94	34/8846	0.305046	0.386923	0.27305	Cdc42	1	3dpi	NonN_8
R-MMU-2132295	MHC class II antigen presentation	2/94	105/8846	0.307188	0.388716	0.274316	Dynll1/Tuba1a	2	3dpi	NonN_8
R-MMU-1236974	ER-Phagosome pathway	1/94	35/8846	0.312459	0.391674	0.276403	B2m	1	3dpi	NonN_8
R-MMU-76009	Platelet Aggregation (Plug Formation)	1/94	35/8846	0.312459	0.391674	0.276403	Rap1a	1	3dpi	NonN_8
R-MMU-8956319	Nucleobase catabolism	1/94	35/8846	0.312459	0.391674	0.276403	Upp2	1	3dpi	NonN_8
R-MMU-9013420	RHOU GTPase cycle	1/94	35/8846	0.312459	0.391674	0.276403	Cdc42	1	3dpi	NonN_8
R-MMU-446652	Interleukin-1 family signaling	2/94	107/8846	0.315041	0.393986	0.278034	Ubb/Rps27a	2	3dpi	NonN_8
R-MMU-202733	Cell surface interactions at the vascular wall	2/94	108/8846	0.318961	0.397028	0.280181	Bsg/Ppia	2	3dpi	NonN_8
R-MMU-212165	Epigenetic regulation of gene expression	2/94	108/8846	0.318961	0.397028	0.280181	Actb/H3f3b	2	3dpi	NonN_8
R-MMU-1222556	ROS and RNS production in phagocytes	1/94	36/8846	0.319794	0.39714	0.28026	Atp6v0c	1	3dpi	NonN_8
R-MMU-8878171	Transcriptional regulation by RUNX1	3/94	188/8846	0.322658	0.39911	0.281651	H3f3b/Ubb/Rps27a	3	3dpi	NonN_8
R-MMU-6807070	PTEN Regulation	2/94	109/8846	0.322876	0.39911	0.281651	Ubb/Rps27a	2	3dpi	NonN_8
R-MMU-8875878	MET promotes cell motility	1/94	37/8846	0.327052	0.403339	0.284635	Rap1a	1	3dpi	NonN_8
R-MMU-5693567	HDR through Homologous Recombination (HRR) or Single Strand Annealing (SSA)	2/94	111/8846	0.330689	0.406884	0.287137	Ubb/Rps27a	2	3dpi	NonN_8
R-MMU-109606	Intrinsic Pathway for Apoptosis	1/94	38/8846	0.334233	0.410299	0.289547	Dynll1	1	3dpi	NonN_8
R-MMU-5693538	Homology Directed Repair	2/94	114/8846	0.342363	0.417401	0.294559	Ubb/Rps27a	2	3dpi	NonN_8
R-MMU-69239	Synthesis of DNA	2/94	114/8846	0.342363	0.417401	0.294559	Ubb/Rps27a	2	3dpi	NonN_8
R-MMU-8957275	Post-translational protein phosphorylation	2/94	114/8846	0.342363	0.417401	0.294559	Cst3/Igfbp7	2	3dpi	NonN_8
R-MMU-9018519	Estrogen-dependent gene expression	2/94	115/8846	0.34624	0.421167	0.297216	Hsp90ab1/H3f3b	2	3dpi	NonN_8
R-MMU-9696264	RND3 GTPase cycle	1/94	40/8846	0.348368	0.422792	0.298363	Ckb	1	3dpi	NonN_8
R-MMU-1266738	Developmental Biology	6/94	454/8846	0.352165	0.426431	0.300931	Hsp90ab1/Actb/Cdc42/Ubb/Tuba1a/Rps27a	6	3dpi	NonN_8
R-MMU-166658	Complement cascade	1/94	41/8846	0.355324	0.429283	0.302943	Cd81	1	3dpi	NonN_8
R-MMU-1296072	Voltage gated Potassium channels	1/94	42/8846	0.362206	0.434647	0.306729	Kcnb2	1	3dpi	NonN_8
R-MMU-6796648	TP53 Regulates Transcription of DNA Repair Genes	1/94	42/8846	0.362206	0.434647	0.306729	Elob	1	3dpi	NonN_8
R-MMU-983170	Antigen Presentation: Folding, assembly and peptide loading of class I MHC	1/94	42/8846	0.362206	0.434647	0.306729	B2m	1	3dpi	NonN_8
R-MMU-381426	Regulation of Insulin-like Growth Factor (IGF) transport and uptake by Insulin-like Growth Factor Binding Proteins (IGFBPs)	2/94	120/8846	0.365516	0.437636	0.308838	Cst3/Igfbp7	2	3dpi	NonN_8
R-MMU-73887	Death Receptor Signalling	2/94	121/8846	0.369347	0.441233	0.311377	Ubb/Rps27a	2	3dpi	NonN_8
R-MMU-69306	DNA Replication	2/94	122/8846	0.373169	0.444804	0.313897	Ubb/Rps27a	2	3dpi	NonN_8
R-MMU-3000178	ECM proteoglycans	1/94	44/8846	0.375754	0.446887	0.315367	Sparc	1	3dpi	NonN_8
R-MMU-112314	Neurotransmitter receptors and postsynaptic signal transmission	2/94	123/8846	0.376981	0.447351	0.315694	Calm1/Calm2	2	3dpi	NonN_8
R-MMU-168898	Toll-like Receptor Cascades	2/94	126/8846	0.388363	0.458818	0.323786	Ubb/Rps27a	2	3dpi	NonN_8
R-MMU-453279	Mitotic G1 phase and G1/S transition	2/94	126/8846	0.388363	0.458818	0.323786	Ubb/Rps27a	2	3dpi	NonN_8
R-MMU-373755	Semaphorin interactions	1/94	47/8846	0.395543	0.464219	0.327598	Hsp90ab1	1	3dpi	NonN_8
R-MMU-9013405	RHOD GTPase cycle	1/94	47/8846	0.395543	0.464219	0.327598	Diaph2	1	3dpi	NonN_8
R-MMU-9013409	RHOJ GTPase cycle	1/94	47/8846	0.395543	0.464219	0.327598	Cdc42	1	3dpi	NonN_8
R-MMU-112310	Neurotransmitter release cycle	1/94	48/8846	0.402	0.470763	0.332216	Stxbp1	1	3dpi	NonN_8
R-MMU-1638091	Heparan sulfate/heparin (HS-GAG) metabolism	1/94	51/8846	0.420966	0.49082	0.34637	Hs3st4	1	3dpi	NonN_8
R-MMU-71406	Pyruvate metabolism and Citric Acid (TCA) cycle	1/94	51/8846	0.420966	0.49082	0.34637	Bsg	1	3dpi	NonN_8
R-MMU-432722	Golgi Associated Vesicle Biogenesis	1/94	52/8846	0.427155	0.496951	0.350697	Dnajc6	1	3dpi	NonN_8
R-MMU-2424491	DAP12 signaling	1/94	53/8846	0.433278	0.49972	0.352651	B2m	1	3dpi	NonN_8
R-MMU-9013406	RHOQ GTPase cycle	1/94	53/8846	0.433278	0.49972	0.352651	Cdc42	1	3dpi	NonN_8
R-MMU-9639288	Amino acids regulate mTORC1	1/94	53/8846	0.433278	0.49972	0.352651	Atp6v0c	1	3dpi	NonN_8
R-MMU-9711097	Cellular response to starvation	1/94	53/8846	0.433278	0.49972	0.352651	Atp6v0c	1	3dpi	NonN_8
R-MMU-5693532	DNA Double-Strand Break Repair	2/94	140/8846	0.440203	0.506613	0.357515	Ubb/Rps27a	2	3dpi	NonN_8
R-MMU-69242	S Phase	2/94	141/8846	0.443817	0.509222	0.359356	Ubb/Rps27a	2	3dpi	NonN_8
R-MMU-112382	Formation of RNA Pol II elongation complex	1/94	55/8846	0.445331	0.509222	0.359356	Elob	1	3dpi	NonN_8
R-MMU-75955	RNA Polymerase II Transcription Elongation	1/94	55/8846	0.445331	0.509222	0.359356	Elob	1	3dpi	NonN_8
R-MMU-199977	ER to Golgi Anterograde Transport	2/94	142/8846	0.447419	0.510517	0.36027	Dynll1/Tuba1a	2	3dpi	NonN_8
R-MMU-9012999	RHO GTPase cycle	5/94	413/8846	0.448768	0.510964	0.360586	Hsp90ab1/Ckb/Actb/Cdc42/Diaph2	5	3dpi	NonN_8
R-MMU-5633007	Regulation of TP53 Activity	2/94	143/8846	0.451008	0.512422	0.361614	Ubb/Rps27a	2	3dpi	NonN_8
R-MMU-388841	Costimulation by the CD28 family	1/94	57/8846	0.45713	0.518274	0.365745	Cdc42	1	3dpi	NonN_8
R-MMU-187037	Signaling by NTRK1 (TRKA)	1/94	59/8846	0.46868	0.529123	0.373401	Rap1a	1	3dpi	NonN_8
R-MMU-422356	Regulation of insulin secretion	1/94	59/8846	0.46868	0.529123	0.373401	Rap1a	1	3dpi	NonN_8
R-MMU-174824	Plasma lipoprotein assembly, remodeling, and clearance	1/94	60/8846	0.474364	0.532219	0.375585	Pltp	1	3dpi	NonN_8
R-MMU-2995410	Nuclear Envelope (NE) Reassembly	1/94	60/8846	0.474364	0.532219	0.375585	Tuba1a	1	3dpi	NonN_8
R-MMU-5688426	Deubiquitination	3/94	241/8846	0.474412	0.532219	0.375585	Actb/Ubb/Rps27a	3	3dpi	NonN_8
R-MMU-201681	TCF dependent signaling in response to WNT	2/94	150/8846	0.475761	0.532613	0.375863	Ubb/Rps27a	2	3dpi	NonN_8
R-MMU-70171	Glycolysis	1/94	61/8846	0.479988	0.536221	0.378409	Aldoa	1	3dpi	NonN_8
R-MMU-69481	G2/M Checkpoints	2/94	152/8846	0.482711	0.538137	0.379762	Ubb/Rps27a	2	3dpi	NonN_8
R-MMU-2172127	DAP12 interactions	1/94	62/8846	0.485552	0.539054	0.380408	B2m	1	3dpi	NonN_8
R-MMU-427413	NoRC negatively regulates rRNA expression	1/94	62/8846	0.485552	0.539054	0.380408	H3f3b	1	3dpi	NonN_8
R-MMU-6794362	Protein-protein interactions at synapses	1/94	63/8846	0.491057	0.542908	0.383129	Ntrk3	1	3dpi	NonN_8
R-MMU-73728	RNA Polymerase I Promoter Opening	1/94	63/8846	0.491057	0.542908	0.383129	H3f3b	1	3dpi	NonN_8
R-MMU-983169	Class I MHC mediated antigen processing & presentation	4/94	342/8846	0.495352	0.546525	0.385681	B2m/Elob/Ubb/Rps27a	4	3dpi	NonN_8
R-MMU-427359	SIRT1 negatively regulates rRNA expression	1/94	64/8846	0.496504	0.546667	0.385781	H3f3b	1	3dpi	NonN_8
R-MMU-5250941	Negative epigenetic regulation of rRNA expression	1/94	65/8846	0.501894	0.551463	0.389166	H3f3b	1	3dpi	NonN_8
R-MMU-5625886	Activated PKN1 stimulates transcription of AR (androgen receptor) regulated genes KLK2 and KLK3	1/94	66/8846	0.507226	0.556178	0.392493	H3f3b	1	3dpi	NonN_8
R-MMU-199992	trans-Golgi Network Vesicle Budding	1/94	68/8846	0.517721	0.565364	0.398976	Dnajc6	1	3dpi	NonN_8
R-MMU-9013408	RHOG GTPase cycle	1/94	68/8846	0.517721	0.565364	0.398976	Cdc42	1	3dpi	NonN_8
R-MMU-196854	Metabolism of vitamins and cofactors	2/94	165/8846	0.526493	0.57377	0.404908	Calm1/Calm2	2	3dpi	NonN_8
R-MMU-216083	Integrin cell surface interactions	1/94	70/8846	0.527996	0.574236	0.405236	Bsg	1	3dpi	NonN_8
R-MMU-8978868	Fatty acid metabolism	2/94	167/8846	0.533008	0.577382	0.407457	Ptgds/Gpx4	2	3dpi	NonN_8
R-MMU-3214858	RMTs methylate histone arginines	1/94	71/8846	0.533051	0.577382	0.407457	Rps2	1	3dpi	NonN_8
R-MMU-74752	Signaling by Insulin receptor	1/94	72/8846	0.538053	0.58162	0.410448	Atp6v0c	1	3dpi	NonN_8
R-MMU-948021	Transport to the Golgi and subsequent modification	2/94	170/8846	0.542667	0.585423	0.413131	Dynll1/Tuba1a	2	3dpi	NonN_8
R-MMU-212300	PRC2 methylates histones and DNA	1/94	74/8846	0.547899	0.589875	0.416273	H3f3b	1	3dpi	NonN_8
R-MMU-425366	Transport of bile salts and organic acids, metal ions and amine compounds	1/94	76/8846	0.557537	0.597841	0.421894	Bsg	1	3dpi	NonN_8
R-MMU-674695	RNA Polymerase II Pre-transcription Events	1/94	76/8846	0.557537	0.597841	0.421894	Elob	1	3dpi	NonN_8
R-MMU-163685	Integration of energy metabolism	1/94	77/8846	0.562279	0.601718	0.42463	Rap1a	1	3dpi	NonN_8
R-MMU-5689880	Ub-specific processing proteases	2/94	179/8846	0.570818	0.609265	0.429957	Ubb/Rps27a	2	3dpi	NonN_8
R-MMU-8936459	RUNX1 regulates genes involved in megakaryocyte differentiation and platelet function	1/94	79/8846	0.571614	0.609265	0.429957	H3f3b	1	3dpi	NonN_8
R-MMU-70326	Glucose metabolism	1/94	80/8846	0.576207	0.612938	0.432548	Aldoa	1	3dpi	NonN_8
R-MMU-9013404	RAC2 GTPase cycle	1/94	81/8846	0.580752	0.616544	0.435093	Cdc42	1	3dpi	NonN_8
R-MMU-983168	Antigen processing: Ubiquitination & Proteasome degradation	3/94	283/8846	0.583276	0.617995	0.436117	Elob/Ubb/Rps27a	3	3dpi	NonN_8
R-MMU-3371556	Cellular response to heat stress	1/94	82/8846	0.585248	0.618856	0.436725	Hsp90ab1	1	3dpi	NonN_8
R-MMU-5625740	RHO GTPases activate PKNs	1/94	84/8846	0.594098	0.626973	0.442453	H3f3b	1	3dpi	NonN_8
R-MMU-9013423	RAC3 GTPase cycle	1/94	85/8846	0.598452	0.630322	0.444817	Cdc42	1	3dpi	NonN_8
R-MMU-5617833	Cilium Assembly	2/94	194/8846	0.614943	0.64564	0.455626	Dynll1/Tuba1a	2	3dpi	NonN_8
R-MMU-73772	RNA Polymerase I Promoter Escape	1/94	89/8846	0.615413	0.64564	0.455626	H3f3b	1	3dpi	NonN_8
R-MMU-73894	DNA Repair	3/94	298/8846	0.618615	0.647726	0.457098	Actb/Ubb/Rps27a	3	3dpi	NonN_8
R-MMU-156580	Phase II - Conjugation of compounds	1/94	92/8846	0.627667	0.655918	0.462879	Gstp1	1	3dpi	NonN_8
R-MMU-1236975	Antigen processing-Cross presentation	1/94	93/8846	0.631665	0.658807	0.464918	B2m	1	3dpi	NonN_8
R-MMU-15869	Metabolism of nucleotides	1/94	95/8846	0.639534	0.665714	0.469792	Upp2	1	3dpi	NonN_8
R-MMU-211859	Biological oxidations	2/94	204/8846	0.642412	0.667409	0.470988	Hsp90ab1/Gstp1	2	3dpi	NonN_8
R-MMU-1296071	Potassium Channels	1/94	97/8846	0.647237	0.671116	0.473604	Kcnb2	1	3dpi	NonN_8
R-MMU-109581	Apoptosis	1/94	100/8846	0.658487	0.681457	0.480902	Dynll1	1	3dpi	NonN_8
R-MMU-5578749	Transcriptional regulation by small RNAs	1/94	105/8846	0.676453	0.697347	0.492116	H3f3b	1	3dpi	NonN_8
R-MMU-73854	RNA Polymerase I Promoter Clearance	1/94	105/8846	0.676453	0.697347	0.492116	H3f3b	1	3dpi	NonN_8
R-MMU-73864	RNA Polymerase I Transcription	1/94	106/8846	0.679933	0.699584	0.493694	H3f3b	1	3dpi	NonN_8
R-MMU-211945	Phase I - Functionalization of compounds	1/94	107/8846	0.683375	0.701773	0.495239	Hsp90ab1	1	3dpi	NonN_8
R-MMU-1257604	PIP3 activates AKT signaling	2/94	223/8846	0.690371	0.707597	0.499349	Ubb/Rps27a	2	3dpi	NonN_8
R-MMU-211000	Gene Silencing by RNA	1/94	113/8846	0.703273	0.71944	0.507707	H3f3b	1	3dpi	NonN_8
R-MMU-1630316	Glycosaminoglycan metabolism	1/94	118/8846	0.718906	0.734026	0.518	Hs3st4	1	3dpi	NonN_8
R-MMU-1474228	Degradation of the extracellular matrix	1/94	119/8846	0.721933	0.735711	0.519189	Bsg	1	3dpi	NonN_8
R-MMU-449147	Signaling by Interleukins	2/94	254/8846	0.757282	0.770264	0.543573	Ubb/Rps27a	2	3dpi	NonN_8
R-MMU-1474244	Extracellular matrix organization	2/94	256/8846	0.761144	0.77272	0.545306	Bsg/Sparc	2	3dpi	NonN_8
R-MMU-9013148	CDC42 GTPase cycle	1/94	138/8846	0.773695	0.783972	0.553246	Cdc42	1	3dpi	NonN_8
R-MMU-1280215	Cytokine Signaling in Immune system	3/94	381/8846	0.7769	0.785729	0.554486	Elob/Ubb/Rps27a	3	3dpi	NonN_8
R-MMU-418594	G alpha (i) signalling events	2/94	268/8846	0.783227	0.79063	0.557945	Calm1/Calm2	2	3dpi	NonN_8
R-MMU-9013149	RAC1 GTPase cycle	1/94	166/8846	0.83308	0.839367	0.592339	Cdc42	1	3dpi	NonN_8
R-MMU-3247509	Chromatin modifying enzymes	1/94	201/8846	0.886061	0.889392	0.627641	Rps2	1	3dpi	NonN_8
R-MMU-4839726	Chromatin organization	1/94	201/8846	0.886061	0.889392	0.627641	Rps2	1	3dpi	NonN_8
R-MMU-71291	Metabolism of amino acids and derivatives	1/94	248/8846	0.931937	0.933685	0.658899	Ckb	1	3dpi	NonN_8
R-MMU-9709957	Sensory Perception	2/94	456/8846	0.958535	0.958535	0.676435	Calm1/Calm2	2	3dpi	NonN_8
R-MMU-1799339	SRP-dependent cotranslational protein targeting to membrane	17/40	88/8846	1.32581e-24	3.77974e-22	3.19563e-22	Rpl24/Rpl13/Rpl3/Rps3a1/Rps3/Rpl30/Rpl11/Rps26/Rps14/Rpl23/Rpl34/Rps21/Rps10/Rps13/Rpl10/Rpl38/Rpl27a	17	3dpi	NonN_7
R-MMU-975956	Nonsense Mediated Decay (NMD) independent of the Exon Junction Complex (EJC)	17/40	90/8846	2.0105e-24	3.77974e-22	3.19563e-22	Rpl24/Rpl13/Rpl3/Rps3a1/Rps3/Rpl30/Rpl11/Rps26/Rps14/Rpl23/Rpl34/Rps21/Rps10/Rps13/Rpl10/Rpl38/Rpl27a	17	3dpi	NonN_7
R-MMU-72689	Formation of a pool of free 40S subunits	17/40	97/8846	7.99016e-24	1.00143e-21	8.46676e-22	Rpl24/Rpl13/Rpl3/Rps3a1/Rps3/Rpl30/Rpl11/Rps26/Rps14/Rpl23/Rpl34/Rps21/Rps10/Rps13/Rpl10/Rpl38/Rpl27a	17	3dpi	NonN_7
R-MMU-156827	L13a-mediated translational silencing of Ceruloplasmin expression	17/40	107/8846	4.7873e-23	4.24495e-21	3.58895e-21	Rpl24/Rpl13/Rpl3/Rps3a1/Rps3/Rpl30/Rpl11/Rps26/Rps14/Rpl23/Rpl34/Rps21/Rps10/Rps13/Rpl10/Rpl38/Rpl27a	17	3dpi	NonN_7
R-MMU-72706	GTP hydrolysis and joining of the 60S ribosomal subunit	17/40	108/8846	5.66752e-23	4.24495e-21	3.58895e-21	Rpl24/Rpl13/Rpl3/Rps3a1/Rps3/Rpl30/Rpl11/Rps26/Rps14/Rpl23/Rpl34/Rps21/Rps10/Rps13/Rpl10/Rpl38/Rpl27a	17	3dpi	NonN_7
R-MMU-927802	Nonsense-Mediated Decay (NMD)	17/40	110/8846	7.90283e-23	4.24495e-21	3.58895e-21	Rpl24/Rpl13/Rpl3/Rps3a1/Rps3/Rpl30/Rpl11/Rps26/Rps14/Rpl23/Rpl34/Rps21/Rps10/Rps13/Rpl10/Rpl38/Rpl27a	17	3dpi	NonN_7
R-MMU-975957	Nonsense Mediated Decay (NMD) enhanced by the Exon Junction Complex (EJC)	17/40	110/8846	7.90283e-23	4.24495e-21	3.58895e-21	Rpl24/Rpl13/Rpl3/Rps3a1/Rps3/Rpl30/Rpl11/Rps26/Rps14/Rpl23/Rpl34/Rps21/Rps10/Rps13/Rpl10/Rpl38/Rpl27a	17	3dpi	NonN_7
R-MMU-72613	Eukaryotic Translation Initiation	17/40	115/8846	1.76394e-22	7.36935e-21	6.23053e-21	Rpl24/Rpl13/Rpl3/Rps3a1/Rps3/Rpl30/Rpl11/Rps26/Rps14/Rpl23/Rpl34/Rps21/Rps10/Rps13/Rpl10/Rpl38/Rpl27a	17	3dpi	NonN_7
R-MMU-72737	Cap-dependent Translation Initiation	17/40	115/8846	1.76394e-22	7.36935e-21	6.23053e-21	Rpl24/Rpl13/Rpl3/Rps3a1/Rps3/Rpl30/Rpl11/Rps26/Rps14/Rpl23/Rpl34/Rps21/Rps10/Rps13/Rpl10/Rpl38/Rpl27a	17	3dpi	NonN_7
R-MMU-6791226	Major pathway of rRNA processing in the nucleolus and cytosol	17/40	171/8846	1.98562e-19	6.22161e-18	5.26015e-18	Rpl24/Rpl13/Rpl3/Rps3a1/Rps3/Rpl30/Rpl11/Rps26/Rps14/Rpl23/Rpl34/Rps21/Rps10/Rps13/Rpl10/Rpl38/Rpl27a	17	3dpi	NonN_7
R-MMU-72312	rRNA processing	17/40	171/8846	1.98562e-19	6.22161e-18	5.26015e-18	Rpl24/Rpl13/Rpl3/Rps3a1/Rps3/Rpl30/Rpl11/Rps26/Rps14/Rpl23/Rpl34/Rps21/Rps10/Rps13/Rpl10/Rpl38/Rpl27a	17	3dpi	NonN_7
R-MMU-8868773	rRNA processing in the nucleus and cytosol	17/40	171/8846	1.98562e-19	6.22161e-18	5.26015e-18	Rpl24/Rpl13/Rpl3/Rps3a1/Rps3/Rpl30/Rpl11/Rps26/Rps14/Rpl23/Rpl34/Rps21/Rps10/Rps13/Rpl10/Rpl38/Rpl27a	17	3dpi	NonN_7
R-MMU-72766	Translation	17/40	220/8846	1.53609e-17	4.44283e-16	3.75626e-16	Rpl24/Rpl13/Rpl3/Rps3a1/Rps3/Rpl30/Rpl11/Rps26/Rps14/Rpl23/Rpl34/Rps21/Rps10/Rps13/Rpl10/Rpl38/Rpl27a	17	3dpi	NonN_7
R-MMU-72695	Formation of the ternary complex, and subsequently, the 43S complex	7/40	50/8846	1.92793e-09	5.17788e-08	4.37772e-08	Rps3a1/Rps3/Rps26/Rps14/Rps21/Rps10/Rps13	7	3dpi	NonN_7
R-MMU-72649	Translation initiation complex formation	7/40	57/8846	4.98728e-09	1.17201e-07	9.90893e-08	Rps3a1/Rps3/Rps26/Rps14/Rps21/Rps10/Rps13	7	3dpi	NonN_7
R-MMU-72702	Ribosomal scanning and start codon recognition	7/40	57/8846	4.98728e-09	1.17201e-07	9.90893e-08	Rps3a1/Rps3/Rps26/Rps14/Rps21/Rps10/Rps13	7	3dpi	NonN_7
R-MMU-72662	Activation of the mRNA upon binding of the cap-binding complex and eIFs, and subsequent binding to 43S	7/40	58/8846	5.65323e-09	1.25036e-07	1.05714e-07	Rps3a1/Rps3/Rps26/Rps14/Rps21/Rps10/Rps13	7	3dpi	NonN_7
R-MMU-611105	Respiratory electron transport	5/40	92/8846	5.38367e-05	0.00112459	0.000950801	Cox8a/Cox7c/Cox6b1/Ndufb9/Uqcrq	5	3dpi	NonN_7
R-MMU-163200	Respiratory electron transport, ATP synthesis by chemiosmotic coupling, and heat production by uncoupling proteins.	5/40	116/8846	0.000162202	0.00320989	0.00271385	Cox8a/Cox7c/Cox6b1/Ndufb9/Uqcrq	5	3dpi	NonN_7
R-MMU-9646399	Aggrephagy	3/40	36/8846	0.000551513	0.0103685	0.00876616	Tubb4b/Ubb/Tuba1a	3	3dpi	NonN_7
R-MMU-1428517	The citric acid (TCA) cycle and respiratory electron transport	5/40	167/8846	0.000870745	0.0155905	0.0131812	Cox8a/Cox7c/Cox6b1/Ndufb9/Uqcrq	5	3dpi	NonN_7
R-MMU-9707564	Cytoprotection by HMOX1	4/40	107/8846	0.0013229	0.0226096	0.0191157	Cox8a/Cox7c/Ubb/Cox6b1	4	3dpi	NonN_7
R-MMU-190840	Microtubule-dependent trafficking of connexons from Golgi to the plasma membrane	2/40	16/8846	0.00229853	0.037576	0.0317692	Tubb4b/Tuba1a	2	3dpi	NonN_7
R-MMU-190872	Transport of connexons to the plasma membrane	2/40	17/8846	0.00259757	0.0406953	0.0344065	Tubb4b/Tuba1a	2	3dpi	NonN_7
R-MMU-9663891	Selective autophagy	3/40	63/8846	0.0028192	0.04214	0.0356279	Tubb4b/Ubb/Tuba1a	3	3dpi	NonN_7
R-MMU-1980143	Signaling by NOTCH1	2/40	18/8846	0.00291393	0.04214	0.0356279	Ubb/Maml2	2	3dpi	NonN_7
R-MMU-9705462	Inactivation of CSF3 (G-CSF) signaling	2/40	19/8846	0.00324746	0.0452239	0.0382352	Elob/Ubb	2	3dpi	NonN_7
R-MMU-9711123	Cellular response to chemical stress	4/40	139/8846	0.00344114	0.0462096	0.0390686	Cox8a/Cox7c/Ubb/Cox6b1	4	3dpi	NonN_7
R-MMU-5628897	TP53 Regulates Metabolic Genes	3/40	70/8846	0.00380225	0.0492982	0.0416799	Cox8a/Cox7c/Cox6b1	3	3dpi	NonN_7
R-MMU-8852276	The role of GTSE1 in G2/M progression after G2 checkpoint	3/40	74/8846	0.00444692	0.0557348	0.0471218	Tubb4b/Ubb/Tuba1a	3	3dpi	NonN_7
R-MMU-9674555	Signaling by CSF3 (G-CSF)	2/40	23/8846	0.00475019	0.0576152	0.0487116	Elob/Ubb	2	3dpi	NonN_7
R-MMU-2565942	Regulation of PLK1 Activity at G2/M Transition	3/40	83/8846	0.0061289	0.0699947	0.0591781	Tubb4b/Ubb/Tuba1a	3	3dpi	NonN_7
R-MMU-2262752	Cellular responses to stress	7/40	499/8846	0.00640365	0.0699947	0.0591781	Tubb4b/Cox8a/Cox7c/Elob/Ubb/Cox6b1/Tuba1a	7	3dpi	NonN_7
R-MMU-8955332	Carboxyterminal post-translational modifications of tubulin	2/40	27/8846	0.00651547	0.0699947	0.0591781	Tubb4b/Tuba1a	2	3dpi	NonN_7
R-MMU-9668328	Sealing of the nuclear envelope (NE) by ESCRT-III	2/40	27/8846	0.00651547	0.0699947	0.0591781	Tubb4b/Tuba1a	2	3dpi	NonN_7
R-MMU-3700989	Transcriptional Regulation by TP53	5/40	282/8846	0.00838679	0.0875953	0.0740588	Cox8a/Cox7c/Elob/Ubb/Cox6b1	5	3dpi	NonN_7
R-MMU-190861	Gap junction assembly	2/40	32/8846	0.00907691	0.092241	0.0779865	Tubb4b/Tuba1a	2	3dpi	NonN_7
R-MMU-437239	Recycling pathway of L1	2/40	35/8846	0.0107961	0.106825	0.0903167	Tubb4b/Tuba1a	2	3dpi	NonN_7
R-MMU-5610787	Hedgehog 'off' state	3/40	105/8846	0.0116786	0.112593	0.0951936	Tubb4b/Ubb/Tuba1a	3	3dpi	NonN_7
R-MMU-157118	Signaling by NOTCH	2/40	39/8846	0.0132933	0.124957	0.105647	Ubb/Maml2	2	3dpi	NonN_7
R-MMU-190828	Gap junction trafficking	2/40	40/8846	0.0139533	0.127962	0.108188	Tubb4b/Tuba1a	2	3dpi	NonN_7
R-MMU-157858	Gap junction trafficking and regulation	2/40	42/8846	0.0153152	0.136489	0.115397	Tubb4b/Tuba1a	2	3dpi	NonN_7
R-MMU-1632852	Macroautophagy	3/40	118/8846	0.0159721	0.136489	0.115397	Tubb4b/Ubb/Tuba1a	3	3dpi	NonN_7
R-MMU-9612973	Autophagy	3/40	118/8846	0.0159721	0.136489	0.115397	Tubb4b/Ubb/Tuba1a	3	3dpi	NonN_7
R-MMU-6811436	COPI-independent Golgi-to-ER retrograde traffic	2/40	48/8846	0.0197262	0.164823	0.139352	Tubb4b/Tuba1a	2	3dpi	NonN_7
R-MMU-3371497	HSP90 chaperone cycle for steroid hormone receptors (SHR) in the presence of ligand	2/40	50/8846	0.0213015	0.174117	0.14721	Tubb4b/Tuba1a	2	3dpi	NonN_7
R-MMU-983189	Kinesins	2/40	52/8846	0.0229277	0.181802	0.153707	Tubb4b/Tuba1a	2	3dpi	NonN_7
R-MMU-5358351	Signaling by Hedgehog	3/40	136/8846	0.0232087	0.181802	0.153707	Tubb4b/Ubb/Tuba1a	3	3dpi	NonN_7
R-MMU-5620924	Intraflagellar transport	2/40	55/8846	0.0254601	0.195367	0.165176	Tubb4b/Tuba1a	2	3dpi	NonN_7
R-MMU-2142753	Arachidonic acid metabolism	2/40	57/8846	0.027209	0.204612	0.172992	Ptgds/Gpx4	2	3dpi	NonN_7
R-MMU-2995410	Nuclear Envelope (NE) Reassembly	2/40	60/8846	0.0299209	0.220594	0.186504	Tubb4b/Tuba1a	2	3dpi	NonN_7
R-MMU-373760	L1CAM interactions	2/40	63/8846	0.0327363	0.236709	0.200129	Tubb4b/Tuba1a	2	3dpi	NonN_7
R-MMU-1234176	Oxygen-dependent proline hydroxylation of Hypoxia-inducible Factor Alpha	2/40	65/8846	0.0346691	0.245954	0.207946	Elob/Ubb	2	3dpi	NonN_7
R-MMU-380259	Loss of Nlp from mitotic centrosomes	2/40	68/8846	0.0376499	0.247232	0.209026	Tubb4b/Tuba1a	2	3dpi	NonN_7
R-MMU-380284	Loss of proteins required for interphase microtubule organization from the centrosome	2/40	68/8846	0.0376499	0.247232	0.209026	Tubb4b/Tuba1a	2	3dpi	NonN_7
R-MMU-1234174	Cellular response to hypoxia	2/40	69/8846	0.0386648	0.247232	0.209026	Elob/Ubb	2	3dpi	NonN_7
R-MMU-8978868	Fatty acid metabolism	3/40	167/8846	0.0392215	0.247232	0.209026	Ptgds/Gpx4/Dbi	3	3dpi	NonN_7
R-MMU-8854518	AURKA Activation by TPX2	2/40	71/8846	0.0407259	0.247232	0.209026	Tubb4b/Tuba1a	2	3dpi	NonN_7
R-MMU-69275	G2/M Transition	3/40	175/8846	0.0440741	0.247232	0.209026	Tubb4b/Ubb/Tuba1a	3	3dpi	NonN_7
R-MMU-2122947	NOTCH1 Intracellular Domain Regulates Transcription	1/40	10/8846	0.0443312	0.247232	0.209026	Maml2	1	3dpi	NonN_7
R-MMU-3000480	Scavenging by Class A Receptors	1/40	10/8846	0.0443312	0.247232	0.209026	Apoe	1	3dpi	NonN_7
R-MMU-5689877	Josephin domain DUBs	1/40	10/8846	0.0443312	0.247232	0.209026	Ubb	1	3dpi	NonN_7
R-MMU-8941856	RUNX3 regulates NOTCH signaling	1/40	10/8846	0.0443312	0.247232	0.209026	Maml2	1	3dpi	NonN_7
R-MMU-8964058	HDL remodeling	1/40	10/8846	0.0443312	0.247232	0.209026	Apoe	1	3dpi	NonN_7
R-MMU-9708530	Regulation of BACH1 activity	1/40	10/8846	0.0443312	0.247232	0.209026	Ubb	1	3dpi	NonN_7
R-MMU-453274	Mitotic G2-G2/M phases	3/40	177/8846	0.0453325	0.247232	0.209026	Tubb4b/Ubb/Tuba1a	3	3dpi	NonN_7
R-MMU-380270	Recruitment of mitotic centrosome proteins and complexes	2/40	77/8846	0.0471516	0.247232	0.209026	Tubb4b/Tuba1a	2	3dpi	NonN_7
R-MMU-380287	Centrosome maturation	2/40	77/8846	0.0471516	0.247232	0.209026	Tubb4b/Tuba1a	2	3dpi	NonN_7
R-MMU-8878159	Transcriptional regulation by RUNX3	2/40	77/8846	0.0471516	0.247232	0.209026	Ubb/Maml2	2	3dpi	NonN_7
R-MMU-2467813	Separation of Sister Chromatids	3/40	181/8846	0.0479031	0.247232	0.209026	Tubb4b/Ubb/Tuba1a	3	3dpi	NonN_7
R-MMU-3134975	Regulation of innate immune responses to cytosolic DNA	1/40	11/8846	0.0486574	0.247232	0.209026	Ubb	1	3dpi	NonN_7
R-MMU-5684264	MAP3K8 (TPL2)-dependent MAPK1/3 activation	1/40	11/8846	0.0486574	0.247232	0.209026	Ubb	1	3dpi	NonN_7
R-MMU-8963888	Chylomicron assembly	1/40	11/8846	0.0486574	0.247232	0.209026	Apoe	1	3dpi	NonN_7
R-MMU-8963901	Chylomicron remodeling	1/40	11/8846	0.0486574	0.247232	0.209026	Apoe	1	3dpi	NonN_7
R-MMU-209543	p75NTR recruits signalling complexes	1/40	12/8846	0.0529646	0.252085	0.213129	Ubb	1	3dpi	NonN_7
R-MMU-209560	NF-kB is activated and signals survival	1/40	12/8846	0.0529646	0.252085	0.213129	Ubb	1	3dpi	NonN_7
R-MMU-2162123	Synthesis of Prostaglandins (PG) and Thromboxanes (TX)	1/40	12/8846	0.0529646	0.252085	0.213129	Ptgds	1	3dpi	NonN_7
R-MMU-937039	IRAK1 recruits IKK complex	1/40	12/8846	0.0529646	0.252085	0.213129	Ubb	1	3dpi	NonN_7
R-MMU-975144	IRAK1 recruits IKK complex upon TLR7/8 or 9 stimulation	1/40	12/8846	0.0529646	0.252085	0.213129	Ubb	1	3dpi	NonN_7
R-MMU-170670	Adenylate cyclase inhibitory pathway	1/40	13/8846	0.0572527	0.252351	0.213354	Gnai2	1	3dpi	NonN_7
R-MMU-205043	NRIF signals cell death from the nucleus	1/40	13/8846	0.0572527	0.252351	0.213354	Ubb	1	3dpi	NonN_7
R-MMU-2173791	TGF-beta receptor signaling in EMT (epithelial to mesenchymal transition)	1/40	13/8846	0.0572527	0.252351	0.213354	Ubb	1	3dpi	NonN_7
R-MMU-936440	Negative regulators of DDX58/IFIH1 signaling	1/40	13/8846	0.0572527	0.252351	0.213354	Ubb	1	3dpi	NonN_7
R-MMU-9706369	Negative regulation of FLT3	1/40	13/8846	0.0572527	0.252351	0.213354	Ubb	1	3dpi	NonN_7
R-MMU-975163	IRAK2 mediated activation of TAK1 complex upon TLR7/8 or 9 stimulation	1/40	13/8846	0.0572527	0.252351	0.213354	Ubb	1	3dpi	NonN_7
R-MMU-380320	Recruitment of NuMA to mitotic centrosomes	2/40	88/8846	0.0598145	0.252351	0.213354	Tubb4b/Tuba1a	2	3dpi	NonN_7
R-MMU-110312	Translesion synthesis by REV1	1/40	14/8846	0.0615219	0.252351	0.213354	Ubb	1	3dpi	NonN_7
R-MMU-2173788	Downregulation of TGF-beta receptor signaling	1/40	14/8846	0.0615219	0.252351	0.213354	Ubb	1	3dpi	NonN_7
R-MMU-2559585	Oncogene Induced Senescence	1/40	14/8846	0.0615219	0.252351	0.213354	Ubb	1	3dpi	NonN_7
R-MMU-532668	N-glycan trimming in the ER and Calnexin/Calreticulin cycle	1/40	14/8846	0.0615219	0.252351	0.213354	Ubb	1	3dpi	NonN_7
R-MMU-937072	TRAF6-mediated induction of TAK1 complex within TLR4 complex	1/40	14/8846	0.0615219	0.252351	0.213354	Ubb	1	3dpi	NonN_7
R-MMU-6807878	COPI-mediated anterograde transport	2/40	90/8846	0.0622311	0.252351	0.213354	Tubb4b/Tuba1a	2	3dpi	NonN_7
R-MMU-6811434	COPI-dependent Golgi-to-ER retrograde traffic	2/40	91/8846	0.0634519	0.252351	0.213354	Tubb4b/Tuba1a	2	3dpi	NonN_7
R-MMU-1295596	Spry regulation of FGF signaling	1/40	15/8846	0.0657723	0.252351	0.213354	Ubb	1	3dpi	NonN_7
R-MMU-193639	p75NTR signals via NF-kB	1/40	15/8846	0.0657723	0.252351	0.213354	Ubb	1	3dpi	NonN_7
R-MMU-5655862	Translesion synthesis by POLK	1/40	15/8846	0.0657723	0.252351	0.213354	Ubb	1	3dpi	NonN_7
R-MMU-5656121	Translesion synthesis by POLI	1/40	15/8846	0.0657723	0.252351	0.213354	Ubb	1	3dpi	NonN_7
R-MMU-936964	Activation of IRF3/IRF7 mediated by TBK1/IKK epsilon	1/40	15/8846	0.0657723	0.252351	0.213354	Ubb	1	3dpi	NonN_7
R-MMU-5620912	Anchoring of the basal body to the plasma membrane	2/40	95/8846	0.0684164	0.259844	0.219689	Tubb4b/Tuba1a	2	3dpi	NonN_7
R-MMU-68882	Mitotic Anaphase	3/40	213/8846	0.0709709	0.265767	0.224696	Tubb4b/Ubb/Tuba1a	3	3dpi	NonN_7
R-MMU-2555396	Mitotic Metaphase and Anaphase	3/40	214/8846	0.0717609	0.265767	0.224696	Tubb4b/Ubb/Tuba1a	3	3dpi	NonN_7
R-MMU-110320	Translesion Synthesis by POLH	1/40	17/8846	0.0742168	0.265767	0.224696	Ubb	1	3dpi	NonN_7
R-MMU-2173795	Downregulation of SMAD2/3:SMAD4 transcriptional activity	1/40	17/8846	0.0742168	0.265767	0.224696	Ubb	1	3dpi	NonN_7
R-MMU-6804760	Regulation of TP53 Activity through Methylation	1/40	17/8846	0.0742168	0.265767	0.224696	Ubb	1	3dpi	NonN_7
R-MMU-9018677	Biosynthesis of DHA-derived SPMs	1/40	17/8846	0.0742168	0.265767	0.224696	Gpx4	1	3dpi	NonN_7
R-MMU-376176	Signaling by ROBO receptors	1/40	18/8846	0.078411	0.270384	0.2286	Ubb	1	3dpi	NonN_7
R-MMU-9012852	Signaling by NOTCH3	1/40	18/8846	0.078411	0.270384	0.2286	Ubb	1	3dpi	NonN_7
R-MMU-9013507	NOTCH3 Activation and Transmission of Signal to the Nucleus	1/40	18/8846	0.078411	0.270384	0.2286	Ubb	1	3dpi	NonN_7
R-MMU-9018678	Biosynthesis of specialized proresolving mediators (SPMs)	1/40	18/8846	0.078411	0.270384	0.2286	Gpx4	1	3dpi	NonN_7
R-MMU-2132295	MHC class II antigen presentation	2/40	105/8846	0.0813629	0.270384	0.2286	Tubb4b/Tuba1a	2	3dpi	NonN_7
R-MMU-4641263	Regulation of FZD by ubiquitination	1/40	19/8846	0.0825868	0.270384	0.2286	Ubb	1	3dpi	NonN_7
R-MMU-5696397	Gap-filling DNA repair synthesis and ligation in GG-NER	1/40	19/8846	0.0825868	0.270384	0.2286	Ubb	1	3dpi	NonN_7
R-MMU-6807004	Negative regulation of MET activity	1/40	19/8846	0.0825868	0.270384	0.2286	Ubb	1	3dpi	NonN_7
R-MMU-8963898	Plasma lipoprotein assembly	1/40	19/8846	0.0825868	0.270384	0.2286	Apoe	1	3dpi	NonN_7
R-MMU-9648025	EML4 and NUDC in mitotic spindle formation	2/40	106/8846	0.0826972	0.270384	0.2286	Tubb4b/Tuba1a	2	3dpi	NonN_7
R-MMU-202733	Cell surface interactions at the vascular wall	2/40	108/8846	0.0853861	0.271798	0.229796	Ppia/Mif	2	3dpi	NonN_7
R-MMU-392170	ADP signalling through P2Y purinoceptor 12	1/40	20/8846	0.0867441	0.271798	0.229796	Gnai2	1	3dpi	NonN_7
R-MMU-450321	JNK (c-Jun kinases) phosphorylation and activation mediated by activated human TAK1	1/40	20/8846	0.0867441	0.271798	0.229796	Ubb	1	3dpi	NonN_7
R-MMU-912631	Regulation of signaling by CBL	1/40	20/8846	0.0867441	0.271798	0.229796	Ubb	1	3dpi	NonN_7
R-MMU-937041	IKK complex recruitment mediated by RIP1	1/40	20/8846	0.0867441	0.271798	0.229796	Ubb	1	3dpi	NonN_7
R-MMU-2173789	TGF-beta receptor signaling activates SMADs	1/40	21/8846	0.090883	0.277821	0.234888	Ubb	1	3dpi	NonN_7
R-MMU-400042	Adrenaline,noradrenaline inhibits insulin secretion	1/40	21/8846	0.090883	0.277821	0.234888	Gnai2	1	3dpi	NonN_7
R-MMU-450302	activated TAK1 mediates p38 MAPK activation	1/40	21/8846	0.090883	0.277821	0.234888	Ubb	1	3dpi	NonN_7
R-MMU-2173796	SMAD2/SMAD3:SMAD4 heterotrimer regulates transcription	1/40	22/8846	0.0950037	0.285771	0.241609	Ubb	1	3dpi	NonN_7
R-MMU-350054	Notch-HLH transcription pathway	1/40	22/8846	0.0950037	0.285771	0.241609	Maml2	1	3dpi	NonN_7
R-MMU-2500257	Resolution of Sister Chromatid Cohesion	2/40	117/8846	0.0978076	0.291124	0.246135	Tubb4b/Tuba1a	2	3dpi	NonN_7
R-MMU-174048	APC/C:Cdc20 mediated degradation of Cyclin B	1/40	23/8846	0.0991061	0.291124	0.246135	Ubb	1	3dpi	NonN_7
R-MMU-210991	Basigin interactions	1/40	23/8846	0.0991061	0.291124	0.246135	Ppia	1	3dpi	NonN_7
R-MMU-8863795	Downregulation of ERBB2 signaling	1/40	24/8846	0.10319	0.300772	0.254292	Ubb	1	3dpi	NonN_7
R-MMU-983231	Factors involved in megakaryocyte development and platelet production	2/40	122/8846	0.10492	0.303116	0.256274	Tubb4b/Tuba1a	2	3dpi	NonN_7
R-MMU-446203	Asparagine N-linked glycosylation	3/40	254/8846	0.106503	0.303116	0.256274	Tubb4b/Ubb/Tuba1a	3	3dpi	NonN_7
R-MMU-179409	APC-Cdc20 mediated degradation of Nek2A	1/40	25/8846	0.107257	0.303116	0.256274	Ubb	1	3dpi	NonN_7
R-MMU-8856688	Golgi-to-ER retrograde transport	2/40	124/8846	0.107805	0.303116	0.256274	Tubb4b/Tuba1a	2	3dpi	NonN_7
R-MMU-422475	Axon guidance	3/40	256/8846	0.108391	0.303116	0.256274	Tubb4b/Ubb/Tuba1a	3	3dpi	NonN_7
R-MMU-9675108	Nervous system development	3/40	257/8846	0.10934	0.303116	0.256274	Tubb4b/Ubb/Tuba1a	3	3dpi	NonN_7
R-MMU-8963899	Plasma lipoprotein remodeling	1/40	26/8846	0.111305	0.303116	0.256274	Apoe	1	3dpi	NonN_7
R-MMU-9648002	RAS processing	1/40	26/8846	0.111305	0.303116	0.256274	Ubb	1	3dpi	NonN_7
R-MMU-110314	Recognition of DNA damage by PCNA-containing replication complex	1/40	27/8846	0.115335	0.303116	0.256274	Ubb	1	3dpi	NonN_7
R-MMU-445989	TAK1 activates NFkB by phosphorylation and activation of IKKs complex	1/40	27/8846	0.115335	0.303116	0.256274	Ubb	1	3dpi	NonN_7
R-MMU-5213460	RIPK1-mediated regulated necrosis	1/40	27/8846	0.115335	0.303116	0.256274	Ubb	1	3dpi	NonN_7
R-MMU-5654732	Negative regulation of FGFR3 signaling	1/40	27/8846	0.115335	0.303116	0.256274	Ubb	1	3dpi	NonN_7
R-MMU-5675482	Regulation of necroptotic cell death	1/40	27/8846	0.115335	0.303116	0.256274	Ubb	1	3dpi	NonN_7
R-MMU-5663220	RHO GTPases Activate Formins	2/40	131/8846	0.118067	0.303116	0.256274	Tubb4b/Tuba1a	2	3dpi	NonN_7
R-MMU-1834949	Cytosolic sensors of pathogen-associated DNA	1/40	28/8846	0.119348	0.303116	0.256274	Ubb	1	3dpi	NonN_7
R-MMU-5357956	TNFR1-induced NFkappaB signaling pathway	1/40	28/8846	0.119348	0.303116	0.256274	Ubb	1	3dpi	NonN_7
R-MMU-5689896	Ovarian tumor domain proteases	1/40	28/8846	0.119348	0.303116	0.256274	Ubb	1	3dpi	NonN_7
R-MMU-9607240	FLT3 Signaling	1/40	28/8846	0.119348	0.303116	0.256274	Ubb	1	3dpi	NonN_7
R-MMU-1236394	Signaling by ERBB4	1/40	29/8846	0.123343	0.303116	0.256274	Ubb	1	3dpi	NonN_7
R-MMU-3769402	Deactivation of the beta-catenin transactivating complex	1/40	29/8846	0.123343	0.303116	0.256274	Ubb	1	3dpi	NonN_7
R-MMU-5656169	Termination of translesion DNA synthesis	1/40	29/8846	0.123343	0.303116	0.256274	Ubb	1	3dpi	NonN_7
R-MMU-8866652	Synthesis of active ubiquitin: roles of E1 and E2 enzymes	1/40	29/8846	0.123343	0.303116	0.256274	Ubb	1	3dpi	NonN_7
R-MMU-8964043	Plasma lipoprotein clearance	1/40	29/8846	0.123343	0.303116	0.256274	Apoe	1	3dpi	NonN_7
R-MMU-917729	Endosomal Sorting Complex Required For Transport (ESCRT)	1/40	29/8846	0.123343	0.303116	0.256274	Ubb	1	3dpi	NonN_7
R-MMU-182971	EGFR downregulation	1/40	30/8846	0.12732	0.306873	0.25945	Ubb	1	3dpi	NonN_7
R-MMU-5654726	Negative regulation of FGFR1 signaling	1/40	30/8846	0.12732	0.306873	0.25945	Ubb	1	3dpi	NonN_7
R-MMU-5654733	Negative regulation of FGFR4 signaling	1/40	30/8846	0.12732	0.306873	0.25945	Ubb	1	3dpi	NonN_7
R-MMU-168928	DDX58/IFIH1-mediated induction of interferon-alpha/beta	1/40	31/8846	0.131279	0.312411	0.264133	Ubb	1	3dpi	NonN_7
R-MMU-392518	Signal amplification	1/40	31/8846	0.131279	0.312411	0.264133	Gnai2	1	3dpi	NonN_7
R-MMU-199977	ER to Golgi Anterograde Transport	2/40	142/8846	0.134667	0.315796	0.266995	Tubb4b/Tuba1a	2	3dpi	NonN_7
R-MMU-168638	NOD1/2 Signaling Pathway	1/40	32/8846	0.135221	0.315796	0.266995	Ubb	1	3dpi	NonN_7
R-MMU-5654727	Negative regulation of FGFR2 signaling	1/40	32/8846	0.135221	0.315796	0.266995	Ubb	1	3dpi	NonN_7
R-MMU-2173793	Transcriptional activity of SMAD2/SMAD3:SMAD4 heterotrimer	1/40	33/8846	0.139146	0.317084	0.268083	Ubb	1	3dpi	NonN_7
R-MMU-5357905	Regulation of TNFR1 signaling	1/40	33/8846	0.139146	0.317084	0.268083	Ubb	1	3dpi	NonN_7
R-MMU-5696394	DNA Damage Recognition in GG-NER	1/40	33/8846	0.139146	0.317084	0.268083	Ubb	1	3dpi	NonN_7
R-MMU-6783310	Fanconi Anemia Pathway	1/40	33/8846	0.139146	0.317084	0.268083	Ubb	1	3dpi	NonN_7
R-MMU-2173782	Binding and Uptake of Ligands by Scavenger Receptors	1/40	34/8846	0.143053	0.320166	0.270689	Apoe	1	3dpi	NonN_7
R-MMU-6804757	Regulation of TP53 Degradation	1/40	34/8846	0.143053	0.320166	0.270689	Ubb	1	3dpi	NonN_7
R-MMU-6806003	Regulation of TP53 Expression and Degradation	1/40	34/8846	0.143053	0.320166	0.270689	Ubb	1	3dpi	NonN_7
R-MMU-5689901	Metalloprotease DUBs	1/40	35/8846	0.146943	0.326926	0.276405	Ubb	1	3dpi	NonN_7
R-MMU-110313	Translesion synthesis by Y family DNA polymerases bypasses lesions on DNA template	1/40	36/8846	0.150816	0.32969	0.278741	Ubb	1	3dpi	NonN_7
R-MMU-5696400	Dual Incision in GG-NER	1/40	36/8846	0.150816	0.32969	0.278741	Ubb	1	3dpi	NonN_7
R-MMU-77289	Mitochondrial Fatty Acid Beta-Oxidation	1/40	36/8846	0.150816	0.32969	0.278741	Dbi	1	3dpi	NonN_7
R-MMU-5654741	Signaling by FGFR3	1/40	37/8846	0.154671	0.336164	0.284215	Ubb	1	3dpi	NonN_7
R-MMU-5654743	Signaling by FGFR4	1/40	39/8846	0.162331	0.343225	0.290185	Ubb	1	3dpi	NonN_7
R-MMU-5696395	Formation of Incision Complex in GG-NER	1/40	39/8846	0.162331	0.343225	0.290185	Ubb	1	3dpi	NonN_7
R-MMU-977444	GABA B receptor activation	1/40	39/8846	0.162331	0.343225	0.290185	Gnai2	1	3dpi	NonN_7
R-MMU-991365	Activation of GABAB receptors	1/40	39/8846	0.162331	0.343225	0.290185	Gnai2	1	3dpi	NonN_7
R-MMU-112040	G-protein mediated events	1/40	40/8846	0.166136	0.343225	0.290185	Gnai2	1	3dpi	NonN_7
R-MMU-512988	Interleukin-3, Interleukin-5 and GM-CSF signaling	1/40	40/8846	0.166136	0.343225	0.290185	Ubb	1	3dpi	NonN_7
R-MMU-5675221	Negative regulation of MAPK pathway	1/40	40/8846	0.166136	0.343225	0.290185	Ubb	1	3dpi	NonN_7
R-MMU-9696264	RND3 GTPase cycle	1/40	40/8846	0.166136	0.343225	0.290185	Ckb	1	3dpi	NonN_7
R-MMU-975634	Retinoid metabolism and transport	1/40	40/8846	0.166136	0.343225	0.290185	Apoe	1	3dpi	NonN_7
R-MMU-69231	Cyclin D associated events in G1	1/40	41/8846	0.169923	0.347235	0.293575	Ubb	1	3dpi	NonN_7
R-MMU-69236	G1 Phase	1/40	41/8846	0.169923	0.347235	0.293575	Ubb	1	3dpi	NonN_7
R-MMU-1227986	Signaling by ERBB2	1/40	42/8846	0.173694	0.349246	0.295276	Ubb	1	3dpi	NonN_7
R-MMU-6796648	TP53 Regulates Transcription of DNA Repair Genes	1/40	42/8846	0.173694	0.349246	0.295276	Elob	1	3dpi	NonN_7
R-MMU-75893	TNF signaling	1/40	42/8846	0.173694	0.349246	0.295276	Ubb	1	3dpi	NonN_7
R-MMU-8848021	Signaling by PTK6	1/40	43/8846	0.177449	0.353019	0.298465	Ubb	1	3dpi	NonN_7
R-MMU-9006927	Signaling by Non-Receptor Tyrosine Kinases	1/40	43/8846	0.177449	0.353019	0.298465	Ubb	1	3dpi	NonN_7
R-MMU-948021	Transport to the Golgi and subsequent modification	2/40	170/8846	0.178984	0.3542	0.299463	Tubb4b/Tuba1a	2	3dpi	NonN_7
R-MMU-6806667	Metabolism of fat-soluble vitamins	1/40	44/8846	0.181186	0.356681	0.301561	Apoe	1	3dpi	NonN_7
R-MMU-177929	Signaling by EGFR	1/40	45/8846	0.184907	0.360234	0.304565	Ubb	1	3dpi	NonN_7
R-MMU-73893	DNA Damage Bypass	1/40	45/8846	0.184907	0.360234	0.304565	Ubb	1	3dpi	NonN_7
R-MMU-168643	Nucleotide-binding domain, leucine rich repeat containing receptor (NLR) signaling pathways	1/40	46/8846	0.188612	0.363682	0.30748	Ubb	1	3dpi	NonN_7
R-MMU-5654736	Signaling by FGFR1	1/40	46/8846	0.188612	0.363682	0.30748	Ubb	1	3dpi	NonN_7
R-MMU-6811442	Intra-Golgi and retrograde Golgi-to-ER traffic	2/40	177/8846	0.190412	0.365281	0.308832	Tubb4b/Tuba1a	2	3dpi	NonN_7
R-MMU-5218859	Regulated Necrosis	1/40	47/8846	0.1923	0.367029	0.31031	Ubb	1	3dpi	NonN_7
R-MMU-8866654	E3 ubiquitin ligases ubiquitinate target proteins	1/40	48/8846	0.195972	0.372148	0.314638	Ubb	1	3dpi	NonN_7
R-MMU-6781823	Formation of TC-NER Pre-Incision Complex	1/40	50/8846	0.203266	0.372299	0.314766	Ubb	1	3dpi	NonN_7
R-MMU-75815	Ubiquitin-dependent degradation of Cyclin D	1/40	50/8846	0.203266	0.372299	0.314766	Ubb	1	3dpi	NonN_7
R-MMU-349425	Autodegradation of the E3 ubiquitin ligase COP1	1/40	51/8846	0.20689	0.372299	0.314766	Ubb	1	3dpi	NonN_7
R-MMU-350562	Regulation of ornithine decarboxylase (ODC)	1/40	51/8846	0.20689	0.372299	0.314766	Oaz1	1	3dpi	NonN_7
R-MMU-448424	Interleukin-17 signaling	1/40	51/8846	0.20689	0.372299	0.314766	Ubb	1	3dpi	NonN_7
R-MMU-450294	MAP kinase activation	1/40	51/8846	0.20689	0.372299	0.314766	Ubb	1	3dpi	NonN_7
R-MMU-69601	Ubiquitin Mediated Degradation of Phosphorylated Cdc25A	1/40	51/8846	0.20689	0.372299	0.314766	Ubb	1	3dpi	NonN_7
R-MMU-69610	p53-Independent DNA Damage Response	1/40	51/8846	0.20689	0.372299	0.314766	Ubb	1	3dpi	NonN_7
R-MMU-69613	p53-Independent G1/S DNA damage checkpoint	1/40	51/8846	0.20689	0.372299	0.314766	Ubb	1	3dpi	NonN_7
R-MMU-8939902	Regulation of RUNX2 expression and activity	1/40	51/8846	0.20689	0.372299	0.314766	Ubb	1	3dpi	NonN_7
R-MMU-68877	Mitotic Prometaphase	2/40	188/8846	0.208572	0.372299	0.314766	Tubb4b/Tuba1a	2	3dpi	NonN_7
R-MMU-8932339	ROS sensing by NFE2L2	1/40	52/8846	0.210497	0.372299	0.314766	Ubb	1	3dpi	NonN_7
R-MMU-8941858	Regulation of RUNX3 expression and activity	1/40	52/8846	0.210497	0.372299	0.314766	Ubb	1	3dpi	NonN_7
R-MMU-170834	Signaling by TGF-beta Receptor Complex	1/40	53/8846	0.214088	0.372299	0.314766	Ubb	1	3dpi	NonN_7
R-MMU-450408	AUF1 (hnRNP D0) binds and destabilizes mRNA	1/40	53/8846	0.214088	0.372299	0.314766	Ubb	1	3dpi	NonN_7
R-MMU-8854050	FBXL7 down-regulates AURKA during mitotic entry and in early mitosis	1/40	53/8846	0.214088	0.372299	0.314766	Ubb	1	3dpi	NonN_7
R-MMU-4641257	Degradation of AXIN	1/40	54/8846	0.217663	0.372299	0.314766	Ubb	1	3dpi	NonN_7
R-MMU-5617833	Cilium Assembly	2/40	194/8846	0.21856	0.372299	0.314766	Tubb4b/Tuba1a	2	3dpi	NonN_7
R-MMU-112382	Formation of RNA Pol II elongation complex	1/40	55/8846	0.221222	0.372299	0.314766	Elob	1	3dpi	NonN_7
R-MMU-5610780	Degradation of GLI1 by the proteasome	1/40	55/8846	0.221222	0.372299	0.314766	Ubb	1	3dpi	NonN_7
R-MMU-6799198	Complex I biogenesis	1/40	55/8846	0.221222	0.372299	0.314766	Ndufb9	1	3dpi	NonN_7
R-MMU-69541	Stabilization of p53	1/40	55/8846	0.221222	0.372299	0.314766	Ubb	1	3dpi	NonN_7
R-MMU-75955	RNA Polymerase II Transcription Elongation	1/40	55/8846	0.221222	0.372299	0.314766	Elob	1	3dpi	NonN_7
R-MMU-917937	Iron uptake and transport	1/40	55/8846	0.221222	0.372299	0.314766	Ubb	1	3dpi	NonN_7
R-MMU-977443	GABA receptor activation	1/40	55/8846	0.221222	0.372299	0.314766	Gnai2	1	3dpi	NonN_7
R-MMU-4641258	Degradation of DVL	1/40	56/8846	0.224766	0.372299	0.314766	Ubb	1	3dpi	NonN_7
R-MMU-5607761	Dectin-1 mediated noncanonical NF-kB signaling	1/40	56/8846	0.224766	0.372299	0.314766	Ubb	1	3dpi	NonN_7
R-MMU-5610785	GLI3 is processed to GLI3R by the proteasome	1/40	56/8846	0.224766	0.372299	0.314766	Ubb	1	3dpi	NonN_7
R-MMU-5676590	NIK-->noncanonical NF-kB signaling	1/40	56/8846	0.224766	0.372299	0.314766	Ubb	1	3dpi	NonN_7
R-MMU-5685942	HDR through Homologous Recombination (HRR)	1/40	57/8846	0.228294	0.372767	0.315162	Ubb	1	3dpi	NonN_7
R-MMU-68827	CDT1 association with the CDC6:ORC:origin complex	1/40	57/8846	0.228294	0.372767	0.315162	Ubb	1	3dpi	NonN_7
R-MMU-187577	SCF(Skp2)-mediated degradation of p27/p21	1/40	59/8846	0.235302	0.372767	0.315162	Ubb	1	3dpi	NonN_7
R-MMU-351202	Metabolism of polyamines	1/40	59/8846	0.235302	0.372767	0.315162	Oaz1	1	3dpi	NonN_7
R-MMU-422356	Regulation of insulin secretion	1/40	59/8846	0.235302	0.372767	0.315162	Gnai2	1	3dpi	NonN_7
R-MMU-6782210	Gap-filling DNA repair synthesis and ligation in TC-NER	1/40	59/8846	0.235302	0.372767	0.315162	Ubb	1	3dpi	NonN_7
R-MMU-174824	Plasma lipoprotein assembly, remodeling, and clearance	1/40	60/8846	0.238783	0.372767	0.315162	Apoe	1	3dpi	NonN_7
R-MMU-6782135	Dual incision in TC-NER	1/40	60/8846	0.238783	0.372767	0.315162	Ubb	1	3dpi	NonN_7
R-MMU-9707587	Regulation of HMOX1 expression and activity	1/40	60/8846	0.238783	0.372767	0.315162	Ubb	1	3dpi	NonN_7
R-MMU-4608870	Asymmetric localization of PCP proteins	1/40	61/8846	0.242249	0.372767	0.315162	Ubb	1	3dpi	NonN_7
R-MMU-5358346	Hedgehog ligand biogenesis	1/40	61/8846	0.242249	0.372767	0.315162	Ubb	1	3dpi	NonN_7
R-MMU-1169091	Activation of NF-kappaB in B cells	1/40	62/8846	0.245699	0.372767	0.315162	Ubb	1	3dpi	NonN_7
R-MMU-8878166	Transcriptional regulation by RUNX2	1/40	62/8846	0.245699	0.372767	0.315162	Ubb	1	3dpi	NonN_7
R-MMU-68886	M Phase	3/40	380/8846	0.245708	0.372767	0.315162	Tubb4b/Ubb/Tuba1a	3	3dpi	NonN_7
R-MMU-168164	Toll Like Receptor 3 (TLR3) Cascade	1/40	63/8846	0.249134	0.372767	0.315162	Ubb	1	3dpi	NonN_7
R-MMU-174084	Autodegradation of Cdh1 by Cdh1:APC/C	1/40	63/8846	0.249134	0.372767	0.315162	Ubb	1	3dpi	NonN_7
R-MMU-5693565	Recruitment and ATM-mediated phosphorylation of repair and signaling proteins at DNA double strand breaks	1/40	63/8846	0.249134	0.372767	0.315162	Ubb	1	3dpi	NonN_7
R-MMU-69563	p53-Dependent G1 DNA Damage Response	1/40	63/8846	0.249134	0.372767	0.315162	Ubb	1	3dpi	NonN_7
R-MMU-69580	p53-Dependent G1/S DNA damage checkpoint	1/40	63/8846	0.249134	0.372767	0.315162	Ubb	1	3dpi	NonN_7
R-MMU-9033241	Peroxisomal protein import	1/40	63/8846	0.249134	0.372767	0.315162	Ubb	1	3dpi	NonN_7
R-MMU-5693606	DNA Double Strand Break Response	1/40	64/8846	0.252554	0.372767	0.315162	Ubb	1	3dpi	NonN_7
R-MMU-8951664	Neddylation	2/40	216/8846	0.255508	0.372767	0.315162	Elob/Ubb	2	3dpi	NonN_7
R-MMU-168142	Toll Like Receptor 10 (TLR10) Cascade	1/40	65/8846	0.255958	0.372767	0.315162	Ubb	1	3dpi	NonN_7
R-MMU-168176	Toll Like Receptor 5 (TLR5) Cascade	1/40	65/8846	0.255958	0.372767	0.315162	Ubb	1	3dpi	NonN_7
R-MMU-204998	Cell death signalling via NRAGE, NRIF and NADE	1/40	65/8846	0.255958	0.372767	0.315162	Ubb	1	3dpi	NonN_7
R-MMU-69615	G1/S DNA Damage Checkpoints	1/40	65/8846	0.255958	0.372767	0.315162	Ubb	1	3dpi	NonN_7
R-MMU-8939236	RUNX1 regulates transcription of genes involved in differentiation of HSCs	1/40	65/8846	0.255958	0.372767	0.315162	Ubb	1	3dpi	NonN_7
R-MMU-975871	MyD88 cascade initiated on plasma membrane	1/40	65/8846	0.255958	0.372767	0.315162	Ubb	1	3dpi	NonN_7
R-MMU-166058	MyD88:MAL(TIRAP) cascade initiated on plasma membrane	1/40	66/8846	0.259347	0.372767	0.315162	Ubb	1	3dpi	NonN_7
R-MMU-168179	Toll Like Receptor TLR1:TLR2 Cascade	1/40	66/8846	0.259347	0.372767	0.315162	Ubb	1	3dpi	NonN_7
R-MMU-168188	Toll Like Receptor TLR6:TLR2 Cascade	1/40	66/8846	0.259347	0.372767	0.315162	Ubb	1	3dpi	NonN_7
R-MMU-181438	Toll Like Receptor 2 (TLR2) Cascade	1/40	66/8846	0.259347	0.372767	0.315162	Ubb	1	3dpi	NonN_7
R-MMU-5658442	Regulation of RAS by GAPs	1/40	66/8846	0.259347	0.372767	0.315162	Ubb	1	3dpi	NonN_7
R-MMU-68867	Assembly of the pre-replicative complex	1/40	66/8846	0.259347	0.372767	0.315162	Ubb	1	3dpi	NonN_7
R-MMU-174154	APC/C:Cdc20 mediated degradation of Securin	1/40	67/8846	0.262722	0.372767	0.315162	Ubb	1	3dpi	NonN_7
R-MMU-5654738	Signaling by FGFR2	1/40	67/8846	0.262722	0.372767	0.315162	Ubb	1	3dpi	NonN_7
R-MMU-8948751	Regulation of PTEN stability and activity	1/40	67/8846	0.262722	0.372767	0.315162	Ubb	1	3dpi	NonN_7
R-MMU-9009391	Extra-nuclear estrogen signaling	1/40	67/8846	0.262722	0.372767	0.315162	Gnai2	1	3dpi	NonN_7
R-MMU-1852241	Organelle biogenesis and maintenance	2/40	222/8846	0.265635	0.373308	0.315618	Tubb4b/Tuba1a	2	3dpi	NonN_7
R-MMU-111885	Opioid Signalling	1/40	68/8846	0.266081	0.373308	0.315618	Gnai2	1	3dpi	NonN_7
R-MMU-8852135	Protein ubiquitination	1/40	68/8846	0.266081	0.373308	0.315618	Ubb	1	3dpi	NonN_7
R-MMU-68949	Orc1 removal from chromatin	1/40	69/8846	0.269425	0.373815	0.316048	Ubb	1	3dpi	NonN_7
R-MMU-69202	Cyclin E associated events during G1/S transition	1/40	69/8846	0.269425	0.373815	0.316048	Ubb	1	3dpi	NonN_7
R-MMU-975138	TRAF6 mediated induction of NFkB and MAP kinases upon TLR7/8 or 9 activation	1/40	69/8846	0.269425	0.373815	0.316048	Ubb	1	3dpi	NonN_7
R-MMU-6781827	Transcription-Coupled Nucleotide Excision Repair (TC-NER)	1/40	70/8846	0.272755	0.375662	0.317609	Ubb	1	3dpi	NonN_7
R-MMU-975155	MyD88 dependent cascade initiated on endosome	1/40	70/8846	0.272755	0.375662	0.317609	Ubb	1	3dpi	NonN_7
R-MMU-168181	Toll Like Receptor 7/8 (TLR7/8) Cascade	1/40	71/8846	0.27607	0.376873	0.318633	Ubb	1	3dpi	NonN_7
R-MMU-69656	Cyclin A:Cdk2-associated events at S phase entry	1/40	71/8846	0.27607	0.376873	0.318633	Ubb	1	3dpi	NonN_7
R-MMU-174184	Cdc20:Phospho-APC/C mediated degradation of Cyclin A	1/40	72/8846	0.27937	0.376873	0.318633	Ubb	1	3dpi	NonN_7
R-MMU-5687128	MAPK6/MAPK4 signaling	1/40	72/8846	0.27937	0.376873	0.318633	Ubb	1	3dpi	NonN_7
R-MMU-69017	CDK-mediated phosphorylation and removal of Cdc6	1/40	72/8846	0.27937	0.376873	0.318633	Ubb	1	3dpi	NonN_7
R-MMU-174178	APC/C:Cdh1 mediated degradation of Cdc20 and other APC/C:Cdh1 targeted proteins in late mitosis/early G1	1/40	73/8846	0.282655	0.376873	0.318633	Ubb	1	3dpi	NonN_7
R-MMU-179419	APC:Cdc20 mediated degradation of cell cycle proteins prior to satisfation of the cell cycle checkpoint	1/40	73/8846	0.282655	0.376873	0.318633	Ubb	1	3dpi	NonN_7
R-MMU-5696399	Global Genome Nucleotide Excision Repair (GG-NER)	1/40	73/8846	0.282655	0.376873	0.318633	Ubb	1	3dpi	NonN_7
R-MMU-6806834	Signaling by MET	1/40	73/8846	0.282655	0.376873	0.318633	Ubb	1	3dpi	NonN_7
R-MMU-1168372	Downstream signaling events of B Cell Receptor (BCR)	1/40	74/8846	0.285926	0.379887	0.321181	Ubb	1	3dpi	NonN_7
R-MMU-168138	Toll Like Receptor 9 (TLR9) Cascade	1/40	75/8846	0.289182	0.380183	0.321431	Ubb	1	3dpi	NonN_7
R-MMU-176409	APC/C:Cdc20 mediated degradation of mitotic proteins	1/40	75/8846	0.289182	0.380183	0.321431	Ubb	1	3dpi	NonN_7
R-MMU-2871837	FCERI mediated NF-kB activation	1/40	75/8846	0.289182	0.380183	0.321431	Ubb	1	3dpi	NonN_7
R-MMU-176814	Activation of APC/C and APC/C:Cdc20 mediated degradation of mitotic proteins	1/40	76/8846	0.292423	0.380454	0.32166	Ubb	1	3dpi	NonN_7
R-MMU-195253	Degradation of beta-catenin by the destruction complex	1/40	76/8846	0.292423	0.380454	0.32166	Ubb	1	3dpi	NonN_7
R-MMU-674695	RNA Polymerase II Pre-transcription Events	1/40	76/8846	0.292423	0.380454	0.32166	Elob	1	3dpi	NonN_7
R-MMU-163685	Integration of energy metabolism	1/40	77/8846	0.295651	0.383326	0.324089	Gnai2	1	3dpi	NonN_7
R-MMU-190236	Signaling by FGFR	1/40	79/8846	0.302062	0.387629	0.327727	Ubb	1	3dpi	NonN_7
R-MMU-6804756	Regulation of TP53 Activity through Phosphorylation	1/40	79/8846	0.302062	0.387629	0.327727	Ubb	1	3dpi	NonN_7
R-MMU-9006936	Signaling by TGFB family members	1/40	79/8846	0.302062	0.387629	0.327727	Ubb	1	3dpi	NonN_7
R-MMU-193704	p75 NTR receptor-mediated signalling	1/40	80/8846	0.305247	0.38906	0.328936	Ubb	1	3dpi	NonN_7
R-MMU-5632684	Hedgehog 'on' state	1/40	80/8846	0.305247	0.38906	0.328936	Ubb	1	3dpi	NonN_7
R-MMU-69002	DNA Replication Pre-Initiation	1/40	81/8846	0.308417	0.390505	0.330158	Ubb	1	3dpi	NonN_7
R-MMU-71291	Metabolism of amino acids and derivatives	2/40	248/8846	0.309494	0.390505	0.330158	Oaz1/Ckb	2	3dpi	NonN_7
R-MMU-166166	MyD88-independent TLR4 cascade	1/40	82/8846	0.311573	0.390505	0.330158	Ubb	1	3dpi	NonN_7
R-MMU-450531	Regulation of mRNA stability by proteins that bind AU-rich elements	1/40	82/8846	0.311573	0.390505	0.330158	Ubb	1	3dpi	NonN_7
R-MMU-937061	TRIF(TICAM1)-mediated TLR4 signaling	1/40	82/8846	0.311573	0.390505	0.330158	Ubb	1	3dpi	NonN_7
R-MMU-174143	APC/C-mediated degradation of cell cycle proteins	1/40	84/8846	0.317843	0.394419	0.333467	Ubb	1	3dpi	NonN_7
R-MMU-202424	Downstream TCR signaling	1/40	84/8846	0.317843	0.394419	0.333467	Ubb	1	3dpi	NonN_7
R-MMU-453276	Regulation of mitotic cell cycle	1/40	84/8846	0.317843	0.394419	0.333467	Ubb	1	3dpi	NonN_7
R-MMU-4086400	PCP/CE pathway	1/40	86/8846	0.324057	0.400808	0.338869	Ubb	1	3dpi	NonN_7
R-MMU-2187338	Visual phototransduction	1/40	87/8846	0.327144	0.403299	0.340975	Apoe	1	3dpi	NonN_7
R-MMU-5607764	CLEC7A (Dectin-1) signaling	1/40	89/8846	0.333276	0.408181	0.345103	Ubb	1	3dpi	NonN_7
R-MMU-69052	Switching of origins to a post-replicative state	1/40	89/8846	0.333276	0.408181	0.345103	Ubb	1	3dpi	NonN_7
R-MMU-1266738	Developmental Biology	3/40	454/8846	0.337962	0.412577	0.348819	Tubb4b/Ubb/Tuba1a	3	3dpi	NonN_7
R-MMU-5689603	UCH proteinases	1/40	93/8846	0.345376	0.420264	0.355318	Ubb	1	3dpi	NonN_7
R-MMU-9020702	Interleukin-1 signaling	1/40	94/8846	0.348368	0.422537	0.35724	Ubb	1	3dpi	NonN_7
R-MMU-2559582	Senescence-Associated Secretory Phenotype (SASP)	1/40	95/8846	0.351346	0.423417	0.357984	Ubb	1	3dpi	NonN_7
R-MMU-5668541	TNFR2 non-canonical NF-kB pathway	1/40	95/8846	0.351346	0.423417	0.357984	Ubb	1	3dpi	NonN_7
R-MMU-8856825	Cargo recognition for clathrin-mediated endocytosis	1/40	96/8846	0.354311	0.425626	0.359852	Ubb	1	3dpi	NonN_7
R-MMU-166016	Toll Like Receptor 4 (TLR4) Cascade	1/40	97/8846	0.357263	0.426447	0.360546	Ubb	1	3dpi	NonN_7
R-MMU-2672351	Stimuli-sensing channels	1/40	97/8846	0.357263	0.426447	0.360546	Ubb	1	3dpi	NonN_7
R-MMU-983705	Signaling by the B Cell Receptor (BCR)	1/40	98/8846	0.360201	0.428594	0.362361	Ubb	1	3dpi	NonN_7
R-MMU-382556	ABC-family proteins mediated transport	1/40	99/8846	0.363127	0.429358	0.363007	Ubb	1	3dpi	NonN_7
R-MMU-5696398	Nucleotide Excision Repair	1/40	99/8846	0.363127	0.429358	0.363007	Ubb	1	3dpi	NonN_7
R-MMU-983168	Antigen processing: Ubiquitination & Proteasome degradation	2/40	283/8846	0.367768	0.433482	0.366493	Elob/Ubb	2	3dpi	NonN_7
R-MMU-202403	TCR signaling	1/40	102/8846	0.371825	0.434181	0.367085	Ubb	1	3dpi	NonN_7
R-MMU-69206	G1/S Transition	1/40	102/8846	0.371825	0.434181	0.367085	Ubb	1	3dpi	NonN_7
R-MMU-9609507	Protein localization	1/40	102/8846	0.371825	0.434181	0.367085	Ubb	1	3dpi	NonN_7
R-MMU-2559580	Oxidative Stress Induced Senescence	1/40	107/8846	0.386066	0.446648	0.377625	Ubb	1	3dpi	NonN_7
R-MMU-446652	Interleukin-1 family signaling	1/40	107/8846	0.386066	0.446648	0.377625	Ubb	1	3dpi	NonN_7
R-MMU-5621481	C-type lectin receptors (CLRs)	1/40	107/8846	0.386066	0.446648	0.377625	Ubb	1	3dpi	NonN_7
R-MMU-69278	Cell Cycle, Mitotic	3/40	496/8846	0.390691	0.450364	0.380767	Tubb4b/Ubb/Tuba1a	3	3dpi	NonN_7
R-MMU-6807070	PTEN Regulation	1/40	109/8846	0.391673	0.450364	0.380767	Ubb	1	3dpi	NonN_7
R-MMU-5693567	HDR through Homologous Recombination (HRR) or Single Strand Annealing (SSA)	1/40	111/8846	0.397231	0.455362	0.384993	Ubb	1	3dpi	NonN_7
R-MMU-195258	RHO GTPase Effectors	2/40	304/8846	0.40192	0.459212	0.388248	Tubb4b/Tuba1a	2	3dpi	NonN_7
R-MMU-5693538	Homology Directed Repair	1/40	114/8846	0.405475	0.459212	0.388248	Ubb	1	3dpi	NonN_7
R-MMU-69239	Synthesis of DNA	1/40	114/8846	0.405475	0.459212	0.388248	Ubb	1	3dpi	NonN_7
R-MMU-8957275	Post-translational protein phosphorylation	1/40	114/8846	0.405475	0.459212	0.388248	Apoe	1	3dpi	NonN_7
R-MMU-2454202	Fc epsilon receptor (FCERI) signaling	1/40	116/8846	0.41091	0.46397	0.39227	Ubb	1	3dpi	NonN_7
R-MMU-418555	G alpha (s) signalling events	1/40	118/8846	0.416296	0.468644	0.396222	Tshr	1	3dpi	NonN_7
R-MMU-381426	Regulation of Insulin-like Growth Factor (IGF) transport and uptake by Insulin-like Growth Factor Binding Proteins (IGFBPs)	1/40	120/8846	0.421634	0.473237	0.400105	Apoe	1	3dpi	NonN_7
R-MMU-3858494	Beta-catenin independent WNT signaling	1/40	121/8846	0.424285	0.473387	0.400232	Ubb	1	3dpi	NonN_7
R-MMU-73887	Death Receptor Signalling	1/40	121/8846	0.424285	0.473387	0.400232	Ubb	1	3dpi	NonN_7
R-MMU-69306	DNA Replication	1/40	122/8846	0.426925	0.474922	0.40153	Ubb	1	3dpi	NonN_7
R-MMU-112314	Neurotransmitter receptors and postsynaptic signal transmission	1/40	123/8846	0.429552	0.476435	0.402809	Gnai2	1	3dpi	NonN_7
R-MMU-168898	Toll-like Receptor Cascades	1/40	126/8846	0.437365	0.482255	0.40773	Ubb	1	3dpi	NonN_7
R-MMU-453279	Mitotic G1 phase and G1/S transition	1/40	126/8846	0.437365	0.482255	0.40773	Ubb	1	3dpi	NonN_7
R-MMU-5357801	Programmed Cell Death	1/40	127/8846	0.439946	0.483683	0.408937	Ubb	1	3dpi	NonN_7
R-MMU-8856828	Clathrin-mediated endocytosis	1/40	134/8846	0.457691	0.501726	0.424192	Ubb	1	3dpi	NonN_7
R-MMU-983169	Class I MHC mediated antigen processing & presentation	2/40	342/8846	0.461536	0.50447	0.426511	Elob/Ubb	2	3dpi	NonN_7
R-MMU-5693532	DNA Double-Strand Break Repair	1/40	140/8846	0.472465	0.514918	0.435345	Ubb	1	3dpi	NonN_7
R-MMU-69242	S Phase	1/40	141/8846	0.474889	0.516064	0.436314	Ubb	1	3dpi	NonN_7
R-MMU-5633007	Regulation of TP53 Activity	1/40	143/8846	0.479704	0.519794	0.439468	Ubb	1	3dpi	NonN_7
R-MMU-201681	TCF dependent signaling in response to WNT	1/40	150/8846	0.49622	0.536145	0.453292	Ubb	1	3dpi	NonN_7
R-MMU-69481	G2/M Checkpoints	1/40	152/8846	0.500844	0.539591	0.456205	Ubb	1	3dpi	NonN_7
R-MMU-1280215	Cytokine Signaling in Immune system	2/40	381/8846	0.519188	0.557756	0.471563	Elob/Ubb	2	3dpi	NonN_7
R-MMU-2559583	Cellular Senescence	1/40	162/8846	0.523351	0.560627	0.47399	Ubb	1	3dpi	NonN_7
R-MMU-196854	Metabolism of vitamins and cofactors	1/40	165/8846	0.529908	0.566038	0.478565	Apoe	1	3dpi	NonN_7
R-MMU-983712	Ion channel transport	1/40	170/8846	0.540642	0.575867	0.486876	Ubb	1	3dpi	NonN_7
R-MMU-5689880	Ub-specific processing proteases	1/40	179/8846	0.559363	0.594125	0.502312	Ubb	1	3dpi	NonN_7
R-MMU-8939211	ESR-mediated signaling	1/40	183/8846	0.567443	0.60101	0.508132	Gnai2	1	3dpi	NonN_7
R-MMU-112315	Transmission across Chemical Synapses	1/40	188/8846	0.577339	0.608066	0.514098	Gnai2	1	3dpi	NonN_7
R-MMU-8878171	Transcriptional regulation by RUNX1	1/40	188/8846	0.577339	0.608066	0.514098	Ubb	1	3dpi	NonN_7
R-MMU-1257604	PIP3 activates AKT signaling	1/40	223/8846	0.640694	0.672907	0.56892	Ubb	1	3dpi	NonN_7
R-MMU-195721	Signaling by WNT	1/40	227/8846	0.647316	0.677968	0.573198	Ubb	1	3dpi	NonN_7
R-MMU-9006931	Signaling by Nuclear Receptors	1/40	232/8846	0.655426	0.684556	0.578768	Gnai2	1	3dpi	NonN_7
R-MMU-5688426	Deubiquitination	1/40	241/8846	0.669568	0.695463	0.58799	Ubb	1	3dpi	NonN_7
R-MMU-76002	Platelet activation, signaling and aggregation	1/40	241/8846	0.669568	0.695463	0.58799	Gnai2	1	3dpi	NonN_7
R-MMU-9006925	Intracellular signaling by second messengers	1/40	249/8846	0.681663	0.706075	0.596962	Ubb	1	3dpi	NonN_7
R-MMU-449147	Signaling by Interleukins	1/40	254/8846	0.689002	0.711716	0.601731	Ubb	1	3dpi	NonN_7
R-MMU-5673001	RAF/MAP kinase cascade	1/40	259/8846	0.696176	0.717156	0.60633	Ubb	1	3dpi	NonN_7
R-MMU-5684996	MAPK1/MAPK3 signaling	1/40	265/8846	0.704571	0.723822	0.611966	Ubb	1	3dpi	NonN_7
R-MMU-418594	G alpha (i) signalling events	1/40	268/8846	0.708684	0.726063	0.613861	Gnai2	1	3dpi	NonN_7
R-MMU-69620	Cell Cycle Checkpoints	1/40	270/8846	0.711395	0.72686	0.614534	Ubb	1	3dpi	NonN_7
R-MMU-5683057	MAPK family signaling cascades	1/40	288/8846	0.73471	0.748647	0.632955	Ubb	1	3dpi	NonN_7
R-MMU-373076	Class A/1 (Rhodopsin-like receptors)	1/40	297/8846	0.745668	0.756924	0.639952	Tshr	1	3dpi	NonN_7
R-MMU-73894	DNA Repair	1/40	298/8846	0.746858	0.756924	0.639952	Ubb	1	3dpi	NonN_7
R-MMU-112316	Neuronal System	1/40	311/8846	0.761843	0.770034	0.651037	Gnai2	1	3dpi	NonN_7
R-MMU-500792	GPCR ligand binding	1/40	380/8846	0.828	0.834659	0.705675	Tshr	1	3dpi	NonN_7
R-MMU-9006934	Signaling by Receptor Tyrosine Kinases	1/40	406/8846	0.847955	0.852489	0.72075	Ubb	1	3dpi	NonN_7
R-MMU-9012999	RHO GTPase cycle	1/40	413/8846	0.85293	0.855204	0.723045	Ckb	1	3dpi	NonN_7
R-MMU-9709957	Sensory Perception	1/40	456/8846	0.880184	0.880184	0.744165	Apoe	1	3dpi	NonN_7
R-MMU-1799339	SRP-dependent cotranslational protein targeting to membrane	10/89	88/8846	1.5084e-08	4.94632e-06	3.61298e-06	Rps24/Rpl13/Rps8/Rplp1/Rpl19/Rpl9/Uba52/Rpl6/Rpl11/Rpl27a	10	3dpi	NonN_6
R-MMU-975956	Nonsense Mediated Decay (NMD) independent of the Exon Junction Complex (EJC)	10/89	90/8846	1.88073e-08	4.94632e-06	3.61298e-06	Rps24/Rpl13/Rps8/Rplp1/Rpl19/Rpl9/Uba52/Rpl6/Rpl11/Rpl27a	10	3dpi	NonN_6
R-MMU-72689	Formation of a pool of free 40S subunits	10/89	97/8846	3.9045e-08	6.84588e-06	5.00049e-06	Rps24/Rpl13/Rps8/Rplp1/Rpl19/Rpl9/Uba52/Rpl6/Rpl11/Rpl27a	10	3dpi	NonN_6
R-MMU-156827	L13a-mediated translational silencing of Ceruloplasmin expression	10/89	107/8846	1.00515e-07	9.83641e-06	7.18489e-06	Rps24/Rpl13/Rps8/Rplp1/Rpl19/Rpl9/Uba52/Rpl6/Rpl11/Rpl27a	10	3dpi	NonN_6
R-MMU-72706	GTP hydrolysis and joining of the 60S ribosomal subunit	10/89	108/8846	1.09869e-07	9.83641e-06	7.18489e-06	Rps24/Rpl13/Rps8/Rplp1/Rpl19/Rpl9/Uba52/Rpl6/Rpl11/Rpl27a	10	3dpi	NonN_6
R-MMU-927802	Nonsense-Mediated Decay (NMD)	10/89	110/8846	1.30903e-07	9.83641e-06	7.18489e-06	Rps24/Rpl13/Rps8/Rplp1/Rpl19/Rpl9/Uba52/Rpl6/Rpl11/Rpl27a	10	3dpi	NonN_6
R-MMU-975957	Nonsense Mediated Decay (NMD) enhanced by the Exon Junction Complex (EJC)	10/89	110/8846	1.30903e-07	9.83641e-06	7.18489e-06	Rps24/Rpl13/Rps8/Rplp1/Rpl19/Rpl9/Uba52/Rpl6/Rpl11/Rpl27a	10	3dpi	NonN_6
R-MMU-72613	Eukaryotic Translation Initiation	10/89	115/8846	1.99716e-07	1.16723e-05	8.52589e-06	Rps24/Rpl13/Rps8/Rplp1/Rpl19/Rpl9/Uba52/Rpl6/Rpl11/Rpl27a	10	3dpi	NonN_6
R-MMU-72737	Cap-dependent Translation Initiation	10/89	115/8846	1.99716e-07	1.16723e-05	8.52589e-06	Rps24/Rpl13/Rps8/Rplp1/Rpl19/Rpl9/Uba52/Rpl6/Rpl11/Rpl27a	10	3dpi	NonN_6
R-MMU-1679131	Trafficking and processing of endosomal TLR	4/89	12/8846	4.45657e-06	0.000234416	0.000171226	Ctsb/Lgmn/Ctss/Unc93b1	4	3dpi	NonN_6
R-MMU-6794361	Neurexins and neuroligins	5/89	28/8846	7.53783e-06	0.000286669	0.000209394	Dlgap1/Nlgn1/Lrrtm4/Grm5/Epb41l2	5	3dpi	NonN_6
R-MMU-6791226	Major pathway of rRNA processing in the nucleolus and cytosol	10/89	171/8846	7.62997e-06	0.000286669	0.000209394	Rps24/Rpl13/Rps8/Rplp1/Rpl19/Rpl9/Uba52/Rpl6/Rpl11/Rpl27a	10	3dpi	NonN_6
R-MMU-72312	rRNA processing	10/89	171/8846	7.62997e-06	0.000286669	0.000209394	Rps24/Rpl13/Rps8/Rplp1/Rpl19/Rpl9/Uba52/Rpl6/Rpl11/Rpl27a	10	3dpi	NonN_6
R-MMU-8868773	rRNA processing in the nucleus and cytosol	10/89	171/8846	7.62997e-06	0.000286669	0.000209394	Rps24/Rpl13/Rps8/Rplp1/Rpl19/Rpl9/Uba52/Rpl6/Rpl11/Rpl27a	10	3dpi	NonN_6
R-MMU-72766	Translation	11/89	220/8846	1.16559e-05	0.000408734	0.000298555	Rps24/Rpl13/Rps8/Rplp1/Rpl19/Rpl9/Uba52/Rpl6/Rpl11/Eef1a1/Rpl27a	11	3dpi	NonN_6
R-MMU-2672351	Stimuli-sensing channels	7/89	97/8846	5.07212e-05	0.00166746	0.00121798	Asic2/Uba52/Ubb/Wnk2/Calm2/Unc79/Unc80	7	3dpi	NonN_6
R-MMU-166786	Creation of C4 and C2 activators	3/89	12/8846	0.00020284	0.00627611	0.00458431	C1qb/C1qc/C1qa	3	3dpi	NonN_6
R-MMU-168898	Toll-like Receptor Cascades	7/89	126/8846	0.000263462	0.00768541	0.00561372	Ctsb/Uba52/Ubb/Lgmn/Ctss/Unc93b1/Mapk10	7	3dpi	NonN_6
R-MMU-977606	Regulation of Complement cascade	4/89	32/8846	0.00027761	0.00768541	0.00561372	Cd81/C1qb/C1qc/C1qa	4	3dpi	NonN_6
R-MMU-6794362	Protein-protein interactions at synapses	5/89	63/8846	0.000408808	0.0107517	0.00785343	Dlgap1/Nlgn1/Lrrtm4/Grm5/Epb41l2	5	3dpi	NonN_6
R-MMU-166663	Initial triggering of complement	3/89	18/8846	0.000720169	0.0166882	0.0121897	C1qb/C1qc/C1qa	3	3dpi	NonN_6
R-MMU-376176	Signaling by ROBO receptors	3/89	18/8846	0.000720169	0.0166882	0.0121897	Robo1/Uba52/Ubb	3	3dpi	NonN_6
R-MMU-166658	Complement cascade	4/89	41/8846	0.000729713	0.0166882	0.0121897	Cd81/C1qb/C1qc/C1qa	4	3dpi	NonN_6
R-MMU-450321	JNK (c-Jun kinases) phosphorylation and activation mediated by activated human TAK1	3/89	20/8846	0.000991586	0.0216843	0.0158391	Uba52/Ubb/Mapk10	3	3dpi	NonN_6
R-MMU-422475	Axon guidance	9/89	256/8846	0.00104281	0.0216843	0.0158391	Robo1/Actb/Uba52/Numb/Dab1/Ptprc/Ubb/Dok6/Pak3	9	3dpi	NonN_6
R-MMU-9675108	Nervous system development	9/89	257/8846	0.00107185	0.0216843	0.0158391	Robo1/Actb/Uba52/Numb/Dab1/Ptprc/Ubb/Dok6/Pak3	9	3dpi	NonN_6
R-MMU-983712	Ion channel transport	7/89	170/8846	0.00156991	0.0305843	0.0223399	Asic2/Uba52/Ubb/Wnk2/Calm2/Unc79/Unc80	7	3dpi	NonN_6
R-MMU-9648002	RAS processing	3/89	26/8846	0.00216509	0.0406728	0.0297089	Uba52/Ubb/Calm2	3	3dpi	NonN_6
R-MMU-8856828	Clathrin-mediated endocytosis	6/89	134/8846	0.00224431	0.0407071	0.029734	Actb/Snap91/Uba52/Pacsin2/Ubb/Amph	6	3dpi	NonN_6
R-MMU-5683057	MAPK family signaling cascades	9/89	288/8846	0.00235409	0.0412751	0.0301489	Actb/Uba52/Ksr2/Ubb/Rap1a/Rasgrp3/Rasgrf1/Calm2/Pak3	9	3dpi	NonN_6
R-MMU-76002	Platelet activation, signaling and aggregation	8/89	241/8846	0.00285291	0.0484074	0.0353586	Aldoa/Sparc/Fcer1g/Dgki/Rap1a/Rapgef4/Tmsb4x/Calm2	8	3dpi	NonN_6
R-MMU-202403	TCR signaling	5/89	102/8846	0.00356582	0.0586132	0.0428133	Uba52/Ptprc/Ubb/Fyb/Pak3	5	3dpi	NonN_6
R-MMU-112316	Neuronal System	9/89	311/8846	0.00393166	0.0612034	0.0447053	Dlgap1/Cacna1b/Nlgn1/Gabrb3/Lrrtm4/Grm5/Calm2/Epb41l2/Rims1	9	3dpi	NonN_6
R-MMU-5689877	Josephin domain DUBs	2/89	10/8846	0.00427405	0.0612034	0.0447053	Uba52/Ubb	2	3dpi	NonN_6
R-MMU-9708530	Regulation of BACH1 activity	2/89	10/8846	0.00427405	0.0612034	0.0447053	Uba52/Ubb	2	3dpi	NonN_6
R-MMU-5696394	DNA Damage Recognition in GG-NER	3/89	33/8846	0.00431878	0.0612034	0.0447053	Actb/Uba52/Ubb	3	3dpi	NonN_6
R-MMU-5621481	C-type lectin receptors (CLRs)	5/89	107/8846	0.00437654	0.0612034	0.0447053	Uba52/Fcer1g/Ubb/Calm2/Pak3	5	3dpi	NonN_6
R-MMU-5673001	RAF/MAP kinase cascade	8/89	259/8846	0.00442154	0.0612034	0.0447053	Actb/Uba52/Ksr2/Ubb/Rap1a/Rasgrp3/Rasgrf1/Calm2	8	3dpi	NonN_6
R-MMU-5684996	MAPK1/MAPK3 signaling	8/89	265/8846	0.00507056	0.0665812	0.0486334	Actb/Uba52/Ksr2/Ubb/Rap1a/Rasgrp3/Rasgrf1/Calm2	8	3dpi	NonN_6
R-MMU-3134975	Regulation of innate immune responses to cytosolic DNA	2/89	11/8846	0.00518979	0.0665812	0.0486334	Uba52/Ubb	2	3dpi	NonN_6
R-MMU-5684264	MAP3K8 (TPL2)-dependent MAPK1/3 activation	2/89	11/8846	0.00518979	0.0665812	0.0486334	Uba52/Ubb	2	3dpi	NonN_6
R-MMU-2454202	Fc epsilon receptor (FCERI) signaling	5/89	116/8846	0.00615442	0.0692437	0.0505783	Uba52/Fcer1g/Ubb/Mapk10/Calm2	5	3dpi	NonN_6
R-MMU-209543	p75NTR recruits signalling complexes	2/89	12/8846	0.00618718	0.0692437	0.0505783	Uba52/Ubb	2	3dpi	NonN_6
R-MMU-209560	NF-kB is activated and signals survival	2/89	12/8846	0.00618718	0.0692437	0.0505783	Uba52/Ubb	2	3dpi	NonN_6
R-MMU-2162123	Synthesis of Prostaglandins (PG) and Thromboxanes (TX)	2/89	12/8846	0.00618718	0.0692437	0.0505783	Ptgds/Tbxas1	2	3dpi	NonN_6
R-MMU-937039	IRAK1 recruits IKK complex	2/89	12/8846	0.00618718	0.0692437	0.0505783	Uba52/Ubb	2	3dpi	NonN_6
R-MMU-975144	IRAK1 recruits IKK complex upon TLR7/8 or 9 stimulation	2/89	12/8846	0.00618718	0.0692437	0.0505783	Uba52/Ubb	2	3dpi	NonN_6
R-MMU-1168372	Downstream signaling events of B Cell Receptor (BCR)	4/89	74/8846	0.00644788	0.0706581	0.0516114	Uba52/Ubb/Rasgrp3/Calm2	4	3dpi	NonN_6
R-MMU-5674135	MAP2K and MAPK activation	3/89	39/8846	0.00692737	0.0707618	0.0516871	Actb/Ksr2/Rap1a	3	3dpi	NonN_6
R-MMU-205043	NRIF signals cell death from the nucleus	2/89	13/8846	0.00726452	0.0707618	0.0516871	Uba52/Ubb	2	3dpi	NonN_6
R-MMU-2173791	TGF-beta receptor signaling in EMT (epithelial to mesenchymal transition)	2/89	13/8846	0.00726452	0.0707618	0.0516871	Uba52/Ubb	2	3dpi	NonN_6
R-MMU-936440	Negative regulators of DDX58/IFIH1 signaling	2/89	13/8846	0.00726452	0.0707618	0.0516871	Uba52/Ubb	2	3dpi	NonN_6
R-MMU-9706369	Negative regulation of FLT3	2/89	13/8846	0.00726452	0.0707618	0.0516871	Uba52/Ubb	2	3dpi	NonN_6
R-MMU-975163	IRAK2 mediated activation of TAK1 complex upon TLR7/8 or 9 stimulation	2/89	13/8846	0.00726452	0.0707618	0.0516871	Uba52/Ubb	2	3dpi	NonN_6
R-MMU-110312	Translesion synthesis by REV1	2/89	14/8846	0.00842015	0.0726066	0.0530346	Uba52/Ubb	2	3dpi	NonN_6
R-MMU-2173788	Downregulation of TGF-beta receptor signaling	2/89	14/8846	0.00842015	0.0726066	0.0530346	Uba52/Ubb	2	3dpi	NonN_6
R-MMU-2559585	Oncogene Induced Senescence	2/89	14/8846	0.00842015	0.0726066	0.0530346	Uba52/Ubb	2	3dpi	NonN_6
R-MMU-392517	Rap1 signalling	2/89	14/8846	0.00842015	0.0726066	0.0530346	Rap1a/Rapgef4	2	3dpi	NonN_6
R-MMU-532668	N-glycan trimming in the ER and Calnexin/Calreticulin cycle	2/89	14/8846	0.00842015	0.0726066	0.0530346	Uba52/Ubb	2	3dpi	NonN_6
R-MMU-5626467	RHO GTPases activate IQGAPs	2/89	14/8846	0.00842015	0.0726066	0.0530346	Actb/Calm2	2	3dpi	NonN_6
R-MMU-937072	TRAF6-mediated induction of TAK1 complex within TLR4 complex	2/89	14/8846	0.00842015	0.0726066	0.0530346	Uba52/Ubb	2	3dpi	NonN_6
R-MMU-1295596	Spry regulation of FGF signaling	2/89	15/8846	0.00965242	0.0769268	0.0561903	Uba52/Ubb	2	3dpi	NonN_6
R-MMU-193639	p75NTR signals via NF-kB	2/89	15/8846	0.00965242	0.0769268	0.0561903	Uba52/Ubb	2	3dpi	NonN_6
R-MMU-5655862	Translesion synthesis by POLK	2/89	15/8846	0.00965242	0.0769268	0.0561903	Uba52/Ubb	2	3dpi	NonN_6
R-MMU-5656121	Translesion synthesis by POLI	2/89	15/8846	0.00965242	0.0769268	0.0561903	Uba52/Ubb	2	3dpi	NonN_6
R-MMU-936964	Activation of IRF3/IRF7 mediated by TBK1/IKK epsilon	2/89	15/8846	0.00965242	0.0769268	0.0561903	Uba52/Ubb	2	3dpi	NonN_6
R-MMU-110320	Translesion Synthesis by POLH	2/89	17/8846	0.0123404	0.094073	0.0687146	Uba52/Ubb	2	3dpi	NonN_6
R-MMU-2173795	Downregulation of SMAD2/3:SMAD4 transcriptional activity	2/89	17/8846	0.0123404	0.094073	0.0687146	Uba52/Ubb	2	3dpi	NonN_6
R-MMU-6804760	Regulation of TP53 Activity through Methylation	2/89	17/8846	0.0123404	0.094073	0.0687146	Uba52/Ubb	2	3dpi	NonN_6
R-MMU-1980143	Signaling by NOTCH1	2/89	18/8846	0.0137929	0.0993845	0.0725942	Uba52/Ubb	2	3dpi	NonN_6
R-MMU-5627123	RHO GTPases activate PAKs	2/89	18/8846	0.0137929	0.0993845	0.0725942	Calm2/Pak3	2	3dpi	NonN_6
R-MMU-9012852	Signaling by NOTCH3	2/89	18/8846	0.0137929	0.0993845	0.0725942	Uba52/Ubb	2	3dpi	NonN_6
R-MMU-9013507	NOTCH3 Activation and Transmission of Signal to the Nucleus	2/89	18/8846	0.0137929	0.0993845	0.0725942	Uba52/Ubb	2	3dpi	NonN_6
R-MMU-448424	Interleukin-17 signaling	3/89	51/8846	0.0144801	0.100701	0.0735558	Uba52/Ubb/Mapk10	3	3dpi	NonN_6
R-MMU-450294	MAP kinase activation	3/89	51/8846	0.0144801	0.100701	0.0735558	Uba52/Ubb/Mapk10	3	3dpi	NonN_6
R-MMU-4641263	Regulation of FZD by ubiquitination	2/89	19/8846	0.0153157	0.100701	0.0735558	Uba52/Ubb	2	3dpi	NonN_6
R-MMU-5696397	Gap-filling DNA repair synthesis and ligation in GG-NER	2/89	19/8846	0.0153157	0.100701	0.0735558	Uba52/Ubb	2	3dpi	NonN_6
R-MMU-6807004	Negative regulation of MET activity	2/89	19/8846	0.0153157	0.100701	0.0735558	Uba52/Ubb	2	3dpi	NonN_6
R-MMU-8876725	Protein methylation	2/89	19/8846	0.0153157	0.100701	0.0735558	Eef1a1/Calm2	2	3dpi	NonN_6
R-MMU-9705462	Inactivation of CSF3 (G-CSF) signaling	2/89	19/8846	0.0153157	0.100701	0.0735558	Uba52/Ubb	2	3dpi	NonN_6
R-MMU-983705	Signaling by the B Cell Receptor (BCR)	4/89	98/8846	0.0168845	0.105872	0.0773328	Uba52/Ubb/Rasgrp3/Calm2	4	3dpi	NonN_6
R-MMU-202433	Generation of second messenger molecules	2/89	20/8846	0.0169073	0.105872	0.0773328	Fyb/Pak3	2	3dpi	NonN_6
R-MMU-912631	Regulation of signaling by CBL	2/89	20/8846	0.0169073	0.105872	0.0773328	Uba52/Ubb	2	3dpi	NonN_6
R-MMU-937041	IKK complex recruitment mediated by RIP1	2/89	20/8846	0.0169073	0.105872	0.0773328	Uba52/Ubb	2	3dpi	NonN_6
R-MMU-5610780	Degradation of GLI1 by the proteasome	3/89	55/8846	0.0177263	0.108419	0.0791932	Uba52/Numb/Ubb	3	3dpi	NonN_6
R-MMU-917937	Iron uptake and transport	3/89	55/8846	0.0177263	0.108419	0.0791932	Fth1/Uba52/Ubb	3	3dpi	NonN_6
R-MMU-2173789	TGF-beta receptor signaling activates SMADs	2/89	21/8846	0.0185661	0.110975	0.0810602	Uba52/Ubb	2	3dpi	NonN_6
R-MMU-450302	activated TAK1 mediates p38 MAPK activation	2/89	21/8846	0.0185661	0.110975	0.0810602	Uba52/Ubb	2	3dpi	NonN_6
R-MMU-2142753	Arachidonic acid metabolism	3/89	57/8846	0.0194892	0.115183	0.0841344	Ptgds/Tbxas1/Ltc4s	3	3dpi	NonN_6
R-MMU-2173796	SMAD2/SMAD3:SMAD4 heterotrimer regulates transcription	2/89	22/8846	0.0202907	0.118588	0.0866211	Uba52/Ubb	2	3dpi	NonN_6
R-MMU-2132295	MHC class II antigen presentation	4/89	105/8846	0.0211976	0.12073	0.088186	Ctsb/Lgmn/Capza2/Ctss	4	3dpi	NonN_6
R-MMU-5610787	Hedgehog 'off' state	4/89	105/8846	0.0211976	0.12073	0.088186	Uba52/Numb/Dync2h1/Ubb	4	3dpi	NonN_6
R-MMU-422356	Regulation of insulin secretion	3/89	59/8846	0.0213459	0.12073	0.088186	Cacna1c/Rap1a/Rapgef4	3	3dpi	NonN_6
R-MMU-174048	APC/C:Cdc20 mediated degradation of Cyclin B	2/89	23/8846	0.0220796	0.120978	0.0883669	Uba52/Ubb	2	3dpi	NonN_6
R-MMU-210991	Basigin interactions	2/89	23/8846	0.0220796	0.120978	0.0883669	Ppia/Slc7a8	2	3dpi	NonN_6
R-MMU-9674555	Signaling by CSF3 (G-CSF)	2/89	23/8846	0.0220796	0.120978	0.0883669	Uba52/Ubb	2	3dpi	NonN_6
R-MMU-2559580	Oxidative Stress Induced Senescence	4/89	107/8846	0.0225431	0.120997	0.0883806	Uba52/H3f3b/Ubb/Mapk10	4	3dpi	NonN_6
R-MMU-9707564	Cytoprotection by HMOX1	4/89	107/8846	0.0225431	0.120997	0.0883806	Uba52/Lrpprc/Cox8a/Ubb	4	3dpi	NonN_6
R-MMU-8863795	Downregulation of ERBB2 signaling	2/89	24/8846	0.0239314	0.127151	0.0928757	Uba52/Ubb	2	3dpi	NonN_6
R-MMU-168164	Toll Like Receptor 3 (TLR3) Cascade	3/89	63/8846	0.0253406	0.133292	0.0973614	Uba52/Ubb/Mapk10	3	3dpi	NonN_6
R-MMU-179409	APC-Cdc20 mediated degradation of Nek2A	2/89	25/8846	0.0258446	0.134597	0.0983146	Uba52/Ubb	2	3dpi	NonN_6
R-MMU-168142	Toll Like Receptor 10 (TLR10) Cascade	3/89	65/8846	0.0274787	0.135354	0.0988676	Uba52/Ubb/Mapk10	3	3dpi	NonN_6
R-MMU-168176	Toll Like Receptor 5 (TLR5) Cascade	3/89	65/8846	0.0274787	0.135354	0.0988676	Uba52/Ubb/Mapk10	3	3dpi	NonN_6
R-MMU-975871	MyD88 cascade initiated on plasma membrane	3/89	65/8846	0.0274787	0.135354	0.0988676	Uba52/Ubb/Mapk10	3	3dpi	NonN_6
R-MMU-114608	Platelet degranulation	4/89	115/8846	0.0284407	0.135354	0.0988676	Aldoa/Sparc/Tmsb4x/Calm2	4	3dpi	NonN_6
R-MMU-166058	MyD88:MAL(TIRAP) cascade initiated on plasma membrane	3/89	66/8846	0.0285829	0.135354	0.0988676	Uba52/Ubb/Mapk10	3	3dpi	NonN_6
R-MMU-168179	Toll Like Receptor TLR1:TLR2 Cascade	3/89	66/8846	0.0285829	0.135354	0.0988676	Uba52/Ubb/Mapk10	3	3dpi	NonN_6
R-MMU-168188	Toll Like Receptor TLR6:TLR2 Cascade	3/89	66/8846	0.0285829	0.135354	0.0988676	Uba52/Ubb/Mapk10	3	3dpi	NonN_6
R-MMU-181438	Toll Like Receptor 2 (TLR2) Cascade	3/89	66/8846	0.0285829	0.135354	0.0988676	Uba52/Ubb/Mapk10	3	3dpi	NonN_6
R-MMU-110314	Recognition of DNA damage by PCNA-containing replication complex	2/89	27/8846	0.0298499	0.135354	0.0988676	Uba52/Ubb	2	3dpi	NonN_6
R-MMU-2871809	FCERI mediated Ca+2 mobilization	2/89	27/8846	0.0298499	0.135354	0.0988676	Fcer1g/Calm2	2	3dpi	NonN_6
R-MMU-354192	Integrin signaling	2/89	27/8846	0.0298499	0.135354	0.0988676	Rap1a/Rapgef4	2	3dpi	NonN_6
R-MMU-445989	TAK1 activates NFkB by phosphorylation and activation of IKKs complex	2/89	27/8846	0.0298499	0.135354	0.0988676	Uba52/Ubb	2	3dpi	NonN_6
R-MMU-5213460	RIPK1-mediated regulated necrosis	2/89	27/8846	0.0298499	0.135354	0.0988676	Uba52/Ubb	2	3dpi	NonN_6
R-MMU-5654732	Negative regulation of FGFR3 signaling	2/89	27/8846	0.0298499	0.135354	0.0988676	Uba52/Ubb	2	3dpi	NonN_6
R-MMU-5675482	Regulation of necroptotic cell death	2/89	27/8846	0.0298499	0.135354	0.0988676	Uba52/Ubb	2	3dpi	NonN_6
R-MMU-1834949	Cytosolic sensors of pathogen-associated DNA	2/89	28/8846	0.0319392	0.136859	0.0999667	Uba52/Ubb	2	3dpi	NonN_6
R-MMU-445355	Smooth Muscle Contraction	2/89	28/8846	0.0319392	0.136859	0.0999667	Tpm3/Calm2	2	3dpi	NonN_6
R-MMU-5218920	VEGFR2 mediated vascular permeability	2/89	28/8846	0.0319392	0.136859	0.0999667	Calm2/Pak3	2	3dpi	NonN_6
R-MMU-5357956	TNFR1-induced NFkappaB signaling pathway	2/89	28/8846	0.0319392	0.136859	0.0999667	Uba52/Ubb	2	3dpi	NonN_6
R-MMU-5689896	Ovarian tumor domain proteases	2/89	28/8846	0.0319392	0.136859	0.0999667	Uba52/Ubb	2	3dpi	NonN_6
R-MMU-9607240	FLT3 Signaling	2/89	28/8846	0.0319392	0.136859	0.0999667	Uba52/Ubb	2	3dpi	NonN_6
R-MMU-975138	TRAF6 mediated induction of NFkB and MAP kinases upon TLR7/8 or 9 activation	3/89	69/8846	0.0320352	0.136859	0.0999667	Uba52/Ubb/Mapk10	3	3dpi	NonN_6
R-MMU-76005	Response to elevated platelet cytosolic Ca2+	4/89	120/8846	0.0325525	0.136859	0.0999667	Aldoa/Sparc/Tmsb4x/Calm2	4	3dpi	NonN_6
R-MMU-975155	MyD88 dependent cascade initiated on endosome	3/89	70/8846	0.0332325	0.136859	0.0999667	Uba52/Ubb/Mapk10	3	3dpi	NonN_6
R-MMU-1236394	Signaling by ERBB4	2/89	29/8846	0.0340845	0.136859	0.0999667	Uba52/Ubb	2	3dpi	NonN_6
R-MMU-2871796	FCERI mediated MAPK activation	2/89	29/8846	0.0340845	0.136859	0.0999667	Fcer1g/Mapk10	2	3dpi	NonN_6
R-MMU-3769402	Deactivation of the beta-catenin transactivating complex	2/89	29/8846	0.0340845	0.136859	0.0999667	Uba52/Ubb	2	3dpi	NonN_6
R-MMU-5656169	Termination of translesion DNA synthesis	2/89	29/8846	0.0340845	0.136859	0.0999667	Uba52/Ubb	2	3dpi	NonN_6
R-MMU-8866652	Synthesis of active ubiquitin: roles of E1 and E2 enzymes	2/89	29/8846	0.0340845	0.136859	0.0999667	Uba52/Ubb	2	3dpi	NonN_6
R-MMU-917729	Endosomal Sorting Complex Required For Transport (ESCRT)	2/89	29/8846	0.0340845	0.136859	0.0999667	Uba52/Ubb	2	3dpi	NonN_6
R-MMU-168181	Toll Like Receptor 7/8 (TLR7/8) Cascade	3/89	71/8846	0.0344529	0.13729	0.100282	Uba52/Ubb/Mapk10	3	3dpi	NonN_6
R-MMU-5687128	MAPK6/MAPK4 signaling	3/89	72/8846	0.0356964	0.139312	0.101758	Uba52/Ubb/Pak3	3	3dpi	NonN_6
R-MMU-182971	EGFR downregulation	2/89	30/8846	0.0362846	0.139312	0.101758	Uba52/Ubb	2	3dpi	NonN_6
R-MMU-381676	Glucagon-like Peptide-1 (GLP1) regulates insulin secretion	2/89	30/8846	0.0362846	0.139312	0.101758	Rap1a/Rapgef4	2	3dpi	NonN_6
R-MMU-5654726	Negative regulation of FGFR1 signaling	2/89	30/8846	0.0362846	0.139312	0.101758	Uba52/Ubb	2	3dpi	NonN_6
R-MMU-5654733	Negative regulation of FGFR4 signaling	2/89	30/8846	0.0362846	0.139312	0.101758	Uba52/Ubb	2	3dpi	NonN_6
R-MMU-5696399	Global Genome Nucleotide Excision Repair (GG-NER)	3/89	73/8846	0.0369628	0.139874	0.102169	Actb/Uba52/Ubb	3	3dpi	NonN_6
R-MMU-6806834	Signaling by MET	3/89	73/8846	0.0369628	0.139874	0.102169	Uba52/Ubb/Rap1a	3	3dpi	NonN_6
R-MMU-1266738	Developmental Biology	9/89	454/8846	0.0383242	0.142753	0.104273	Robo1/Actb/Uba52/Numb/Dab1/Ptprc/Ubb/Dok6/Pak3	9	3dpi	NonN_6
R-MMU-168928	DDX58/IFIH1-mediated induction of interferon-alpha/beta	2/89	31/8846	0.038538	0.142753	0.104273	Uba52/Ubb	2	3dpi	NonN_6
R-MMU-420499	Class C/3 (Metabotropic glutamate/pheromone receptors)	2/89	31/8846	0.038538	0.142753	0.104273	Grm5/Grm7	2	3dpi	NonN_6
R-MMU-168138	Toll Like Receptor 9 (TLR9) Cascade	3/89	75/8846	0.0395644	0.14452	0.105563	Uba52/Ubb/Mapk10	3	3dpi	NonN_6
R-MMU-2871837	FCERI mediated NF-kB activation	3/89	75/8846	0.0395644	0.14452	0.105563	Uba52/Fcer1g/Ubb	3	3dpi	NonN_6
R-MMU-168638	NOD1/2 Signaling Pathway	2/89	32/8846	0.0408435	0.147149	0.107483	Uba52/Ubb	2	3dpi	NonN_6
R-MMU-5654727	Negative regulation of FGFR2 signaling	2/89	32/8846	0.0408435	0.147149	0.107483	Uba52/Ubb	2	3dpi	NonN_6
R-MMU-163685	Integration of energy metabolism	3/89	77/8846	0.0422568	0.150485	0.10992	Cacna1c/Rap1a/Rapgef4	3	3dpi	NonN_6
R-MMU-2173793	Transcriptional activity of SMAD2/SMAD3:SMAD4 heterotrimer	2/89	33/8846	0.0432	0.150485	0.10992	Uba52/Ubb	2	3dpi	NonN_6
R-MMU-5357905	Regulation of TNFR1 signaling	2/89	33/8846	0.0432	0.150485	0.10992	Uba52/Ubb	2	3dpi	NonN_6
R-MMU-5576892	Phase 0 - rapid depolarisation	2/89	33/8846	0.0432	0.150485	0.10992	Cacna1c/Calm2	2	3dpi	NonN_6
R-MMU-6783310	Fanconi Anemia Pathway	2/89	33/8846	0.0432	0.150485	0.10992	Uba52/Ubb	2	3dpi	NonN_6
R-MMU-2173782	Binding and Uptake of Ligands by Scavenger Receptors	2/89	34/8846	0.0456061	0.155771	0.113781	Apoe/Sparc	2	3dpi	NonN_6
R-MMU-6804757	Regulation of TP53 Degradation	2/89	34/8846	0.0456061	0.155771	0.113781	Uba52/Ubb	2	3dpi	NonN_6
R-MMU-6806003	Regulation of TP53 Expression and Degradation	2/89	34/8846	0.0456061	0.155771	0.113781	Uba52/Ubb	2	3dpi	NonN_6
R-MMU-5632684	Hedgehog 'on' state	3/89	80/8846	0.0464643	0.157679	0.115175	Uba52/Numb/Ubb	3	3dpi	NonN_6
R-MMU-5358351	Signaling by Hedgehog	4/89	136/8846	0.0479495	0.158993	0.116134	Uba52/Numb/Dync2h1/Ubb	4	3dpi	NonN_6
R-MMU-437239	Recycling pathway of L1	2/89	35/8846	0.0480606	0.158993	0.116134	Actb/Numb	2	3dpi	NonN_6
R-MMU-5689901	Metalloprotease DUBs	2/89	35/8846	0.0480606	0.158993	0.116134	Uba52/Ubb	2	3dpi	NonN_6
R-MMU-76009	Platelet Aggregation (Plug Formation)	2/89	35/8846	0.0480606	0.158993	0.116134	Rap1a/Rapgef4	2	3dpi	NonN_6
R-MMU-166166	MyD88-independent TLR4 cascade	3/89	82/8846	0.0493804	0.16133	0.117841	Uba52/Ubb/Mapk10	3	3dpi	NonN_6
R-MMU-937061	TRIF(TICAM1)-mediated TLR4 signaling	3/89	82/8846	0.0493804	0.16133	0.117841	Uba52/Ubb/Mapk10	3	3dpi	NonN_6
R-MMU-110313	Translesion synthesis by Y family DNA polymerases bypasses lesions on DNA template	2/89	36/8846	0.0505623	0.162169	0.118455	Uba52/Ubb	2	3dpi	NonN_6
R-MMU-5696400	Dual Incision in GG-NER	2/89	36/8846	0.0505623	0.162169	0.118455	Uba52/Ubb	2	3dpi	NonN_6
R-MMU-9646399	Aggrephagy	2/89	36/8846	0.0505623	0.162169	0.118455	Uba52/Ubb	2	3dpi	NonN_6
R-MMU-9711123	Cellular response to chemical stress	4/89	139/8846	0.0512178	0.163276	0.119263	Uba52/Lrpprc/Cox8a/Ubb	4	3dpi	NonN_6
R-MMU-5654741	Signaling by FGFR3	2/89	37/8846	0.0531102	0.168289	0.122925	Uba52/Ubb	2	3dpi	NonN_6
R-MMU-157118	Signaling by NOTCH	2/89	39/8846	0.0583394	0.181577	0.132631	Uba52/Ubb	2	3dpi	NonN_6
R-MMU-5654743	Signaling by FGFR4	2/89	39/8846	0.0583394	0.181577	0.132631	Uba52/Ubb	2	3dpi	NonN_6
R-MMU-5696395	Formation of Incision Complex in GG-NER	2/89	39/8846	0.0583394	0.181577	0.132631	Uba52/Ubb	2	3dpi	NonN_6
R-MMU-5607764	CLEC7A (Dectin-1) signaling	3/89	89/8846	0.0602712	0.186486	0.136217	Uba52/Ubb/Calm2	3	3dpi	NonN_6
R-MMU-512988	Interleukin-3, Interleukin-5 and GM-CSF signaling	2/89	40/8846	0.0610186	0.186603	0.136302	Uba52/Ubb	2	3dpi	NonN_6
R-MMU-5675221	Negative regulation of MAPK pathway	2/89	40/8846	0.0610186	0.186603	0.136302	Uba52/Ubb	2	3dpi	NonN_6
R-MMU-69231	Cyclin D associated events in G1	2/89	41/8846	0.0637393	0.192683	0.140743	Uba52/Ubb	2	3dpi	NonN_6
R-MMU-69236	G1 Phase	2/89	41/8846	0.0637393	0.192683	0.140743	Uba52/Ubb	2	3dpi	NonN_6
R-MMU-4420097	VEGFA-VEGFR2 Pathway	3/89	92/8846	0.065256	0.196141	0.143269	Actb/Calm2/Pak3	3	3dpi	NonN_6
R-MMU-1227986	Signaling by ERBB2	2/89	42/8846	0.0665005	0.197623	0.144351	Uba52/Ubb	2	3dpi	NonN_6
R-MMU-75893	TNF signaling	2/89	42/8846	0.0665005	0.197623	0.144351	Uba52/Ubb	2	3dpi	NonN_6
R-MMU-5689603	UCH proteinases	3/89	93/8846	0.0669589	0.197867	0.14453	Actb/Uba52/Ubb	3	3dpi	NonN_6
R-MMU-8848021	Signaling by PTK6	2/89	43/8846	0.0693011	0.202513	0.147923	Uba52/Ubb	2	3dpi	NonN_6
R-MMU-9006927	Signaling by Non-Receptor Tyrosine Kinases	2/89	43/8846	0.0693011	0.202513	0.147923	Uba52/Ubb	2	3dpi	NonN_6
R-MMU-2559582	Senescence-Associated Secretory Phenotype (SASP)	3/89	95/8846	0.0704253	0.204661	0.149492	Uba52/H3f3b/Ubb	3	3dpi	NonN_6
R-MMU-8856825	Cargo recognition for clathrin-mediated endocytosis	3/89	96/8846	0.0721886	0.208633	0.152393	Snap91/Uba52/Ubb	3	3dpi	NonN_6
R-MMU-166016	Toll Like Receptor 4 (TLR4) Cascade	3/89	97/8846	0.0739717	0.212618	0.155304	Uba52/Ubb/Mapk10	3	3dpi	NonN_6
R-MMU-177929	Signaling by EGFR	2/89	45/8846	0.0750162	0.213289	0.155795	Uba52/Ubb	2	3dpi	NonN_6
R-MMU-73893	DNA Damage Bypass	2/89	45/8846	0.0750162	0.213289	0.155795	Uba52/Ubb	2	3dpi	NonN_6
R-MMU-382556	ABC-family proteins mediated transport	3/89	99/8846	0.0775967	0.216881	0.158418	Uba52/Ubb/Abca9	3	3dpi	NonN_6
R-MMU-5696398	Nucleotide Excision Repair	3/89	99/8846	0.0775967	0.216881	0.158418	Actb/Uba52/Ubb	3	3dpi	NonN_6
R-MMU-168643	Nucleotide-binding domain, leucine rich repeat containing receptor (NLR) signaling pathways	2/89	46/8846	0.0779287	0.216881	0.158418	Uba52/Ubb	2	3dpi	NonN_6
R-MMU-5654736	Signaling by FGFR1	2/89	46/8846	0.0779287	0.216881	0.158418	Uba52/Ubb	2	3dpi	NonN_6
R-MMU-194138	Signaling by VEGF	3/89	100/8846	0.0794382	0.218767	0.159796	Actb/Calm2/Pak3	3	3dpi	NonN_6
R-MMU-425393	Transport of inorganic cations/anions and amino acids/oligopeptides	3/89	100/8846	0.0794382	0.218767	0.159796	Slc7a8/Slc4a10/Calm2	3	3dpi	NonN_6
R-MMU-2559583	Cellular Senescence	4/89	162/8846	0.0802023	0.219284	0.160173	Uba52/H3f3b/Ubb/Mapk10	4	3dpi	NonN_6
R-MMU-373755	Semaphorin interactions	2/89	47/8846	0.0808765	0.219284	0.160173	Ptprc/Pak3	2	3dpi	NonN_6
R-MMU-5218859	Regulated Necrosis	2/89	47/8846	0.0808765	0.219284	0.160173	Uba52/Ubb	2	3dpi	NonN_6
R-MMU-8866654	E3 ubiquitin ligases ubiquitinate target proteins	2/89	48/8846	0.0838586	0.226203	0.165228	Uba52/Ubb	2	3dpi	NonN_6
R-MMU-6781823	Formation of TC-NER Pre-Incision Complex	2/89	50/8846	0.0899219	0.236509	0.172755	Uba52/Ubb	2	3dpi	NonN_6
R-MMU-72695	Formation of the ternary complex, and subsequently, the 43S complex	2/89	50/8846	0.0899219	0.236509	0.172755	Rps24/Rps8	2	3dpi	NonN_6
R-MMU-75815	Ubiquitin-dependent degradation of Cyclin D	2/89	50/8846	0.0899219	0.236509	0.172755	Uba52/Ubb	2	3dpi	NonN_6
R-MMU-349425	Autodegradation of the E3 ubiquitin ligase COP1	2/89	51/8846	0.0930012	0.236509	0.172755	Uba52/Ubb	2	3dpi	NonN_6
R-MMU-69601	Ubiquitin Mediated Degradation of Phosphorylated Cdc25A	2/89	51/8846	0.0930012	0.236509	0.172755	Uba52/Ubb	2	3dpi	NonN_6
R-MMU-69610	p53-Independent DNA Damage Response	2/89	51/8846	0.0930012	0.236509	0.172755	Uba52/Ubb	2	3dpi	NonN_6
R-MMU-69613	p53-Independent G1/S DNA damage checkpoint	2/89	51/8846	0.0930012	0.236509	0.172755	Uba52/Ubb	2	3dpi	NonN_6
R-MMU-8939902	Regulation of RUNX2 expression and activity	2/89	51/8846	0.0930012	0.236509	0.172755	Uba52/Ubb	2	3dpi	NonN_6
R-MMU-202733	Cell surface interactions at the vascular wall	3/89	108/8846	0.0948423	0.236509	0.172755	Ppia/Slc7a8/Fcer1g	3	3dpi	NonN_6
R-MMU-8932339	ROS sensing by NFE2L2	2/89	52/8846	0.0961109	0.236509	0.172755	Uba52/Ubb	2	3dpi	NonN_6
R-MMU-8941858	Regulation of RUNX3 expression and activity	2/89	52/8846	0.0961109	0.236509	0.172755	Uba52/Ubb	2	3dpi	NonN_6
R-MMU-112308	Presynaptic depolarization and calcium channel opening	1/89	10/8846	0.0962222	0.236509	0.172755	Cacna1b	1	3dpi	NonN_6
R-MMU-3000480	Scavenging by Class A Receptors	1/89	10/8846	0.0962222	0.236509	0.172755	Apoe	1	3dpi	NonN_6
R-MMU-391160	Signal regulatory protein family interactions	1/89	10/8846	0.0962222	0.236509	0.172755	Fyb	1	3dpi	NonN_6
R-MMU-450341	Activation of the AP-1 family of transcription factors	1/89	10/8846	0.0962222	0.236509	0.172755	Mapk10	1	3dpi	NonN_6
R-MMU-451306	Ionotropic activity of kainate receptors	1/89	10/8846	0.0962222	0.236509	0.172755	Calm2	1	3dpi	NonN_6
R-MMU-451308	Activation of Ca-permeable Kainate Receptor	1/89	10/8846	0.0962222	0.236509	0.172755	Calm2	1	3dpi	NonN_6
R-MMU-75892	Platelet Adhesion to exposed collagen	1/89	10/8846	0.0962222	0.236509	0.172755	Fcer1g	1	3dpi	NonN_6
R-MMU-8964058	HDL remodeling	1/89	10/8846	0.0962222	0.236509	0.172755	Apoe	1	3dpi	NonN_6
R-MMU-170834	Signaling by TGF-beta Receptor Complex	2/89	53/8846	0.0992503	0.240579	0.175728	Uba52/Ubb	2	3dpi	NonN_6
R-MMU-450408	AUF1 (hnRNP D0) binds and destabilizes mRNA	2/89	53/8846	0.0992503	0.240579	0.175728	Uba52/Ubb	2	3dpi	NonN_6
R-MMU-8854050	FBXL7 down-regulates AURKA during mitotic entry and in early mitosis	2/89	53/8846	0.0992503	0.240579	0.175728	Uba52/Ubb	2	3dpi	NonN_6
R-MMU-4641257	Degradation of AXIN	2/89	54/8846	0.102418	0.24712	0.180506	Uba52/Ubb	2	3dpi	NonN_6
R-MMU-389359	CD28 dependent Vav1 pathway	1/89	11/8846	0.105325	0.249117	0.181965	Pak3	1	3dpi	NonN_6
R-MMU-438064	Post NMDA receptor activation events	1/89	11/8846	0.105325	0.249117	0.181965	Calm2	1	3dpi	NonN_6
R-MMU-8963888	Chylomicron assembly	1/89	11/8846	0.105325	0.249117	0.181965	Apoe	1	3dpi	NonN_6
R-MMU-8963901	Chylomicron remodeling	1/89	11/8846	0.105325	0.249117	0.181965	Apoe	1	3dpi	NonN_6
R-MMU-69541	Stabilization of p53	2/89	55/8846	0.105614	0.249117	0.181965	Uba52/Ubb	2	3dpi	NonN_6
R-MMU-2022090	Assembly of collagen fibrils and other multimeric structures	2/89	56/8846	0.108837	0.251089	0.183405	Ctsb/Ctss	2	3dpi	NonN_6
R-MMU-4641258	Degradation of DVL	2/89	56/8846	0.108837	0.251089	0.183405	Uba52/Ubb	2	3dpi	NonN_6
R-MMU-5607761	Dectin-1 mediated noncanonical NF-kB signaling	2/89	56/8846	0.108837	0.251089	0.183405	Uba52/Ubb	2	3dpi	NonN_6
R-MMU-5610785	GLI3 is processed to GLI3R by the proteasome	2/89	56/8846	0.108837	0.251089	0.183405	Uba52/Ubb	2	3dpi	NonN_6
R-MMU-5676590	NIK-->noncanonical NF-kB signaling	2/89	56/8846	0.108837	0.251089	0.183405	Uba52/Ubb	2	3dpi	NonN_6
R-MMU-5685942	HDR through Homologous Recombination (HRR)	2/89	57/8846	0.112086	0.251639	0.183807	Uba52/Ubb	2	3dpi	NonN_6
R-MMU-68827	CDT1 association with the CDC6:ORC:origin complex	2/89	57/8846	0.112086	0.251639	0.183807	Uba52/Ubb	2	3dpi	NonN_6
R-MMU-72649	Translation initiation complex formation	2/89	57/8846	0.112086	0.251639	0.183807	Rps24/Rps8	2	3dpi	NonN_6
R-MMU-72702	Ribosomal scanning and start codon recognition	2/89	57/8846	0.112086	0.251639	0.183807	Rps24/Rps8	2	3dpi	NonN_6
R-MMU-9006934	Signaling by Receptor Tyrosine Kinases	7/89	406/8846	0.113699	0.251639	0.183807	Actb/Uba52/Ubb/Pde3b/Rap1a/Calm2/Pak3	7	3dpi	NonN_6
R-MMU-170968	Frs2-mediated activation	1/89	12/8846	0.114338	0.251639	0.183807	Rap1a	1	3dpi	NonN_6
R-MMU-2024101	CS/DS degradation	1/89	12/8846	0.114338	0.251639	0.183807	Hexb	1	3dpi	NonN_6
R-MMU-202427	Phosphorylation of CD3 and TCR zeta chains	1/89	12/8846	0.114338	0.251639	0.183807	Ptprc	1	3dpi	NonN_6
R-MMU-203615	eNOS activation	1/89	12/8846	0.114338	0.251639	0.183807	Calm2	1	3dpi	NonN_6
R-MMU-2160916	Hyaluronan uptake and degradation	1/89	12/8846	0.114338	0.251639	0.183807	Hexb	1	3dpi	NonN_6
R-MMU-425561	Sodium/Calcium exchangers	1/89	12/8846	0.114338	0.251639	0.183807	Calm2	1	3dpi	NonN_6
R-MMU-72662	Activation of the mRNA upon binding of the cap-binding complex and eIFs, and subsequent binding to 43S	2/89	58/8846	0.115361	0.252832	0.184678	Rps24/Rps8	2	3dpi	NonN_6
R-MMU-187577	SCF(Skp2)-mediated degradation of p27/p21	2/89	59/8846	0.118659	0.257912	0.188389	Uba52/Ubb	2	3dpi	NonN_6
R-MMU-6782210	Gap-filling DNA repair synthesis and ligation in TC-NER	2/89	59/8846	0.118659	0.257912	0.188389	Uba52/Ubb	2	3dpi	NonN_6
R-MMU-112315	Transmission across Chemical Synapses	4/89	188/8846	0.120829	0.25926	0.189374	Cacna1b/Gabrb3/Calm2/Rims1	4	3dpi	NonN_6
R-MMU-6782135	Dual incision in TC-NER	2/89	60/8846	0.121982	0.25926	0.189374	Uba52/Ubb	2	3dpi	NonN_6
R-MMU-9707587	Regulation of HMOX1 expression and activity	2/89	60/8846	0.121982	0.25926	0.189374	Uba52/Ubb	2	3dpi	NonN_6
R-MMU-3858494	Beta-catenin independent WNT signaling	3/89	121/8846	0.122228	0.25926	0.189374	Uba52/Ubb/Calm2	3	3dpi	NonN_6
R-MMU-2022857	Keratan sulfate degradation	1/89	13/8846	0.123261	0.25926	0.189374	Hexb	1	3dpi	NonN_6
R-MMU-416700	Other semaphorin interactions	1/89	13/8846	0.123261	0.25926	0.189374	Ptprc	1	3dpi	NonN_6
R-MMU-5576893	Phase 2 - plateau phase	1/89	13/8846	0.123261	0.25926	0.189374	Cacna1c	1	3dpi	NonN_6
R-MMU-75109	Triglyceride biosynthesis	1/89	13/8846	0.123261	0.25926	0.189374	Agmo	1	3dpi	NonN_6
R-MMU-983231	Factors involved in megakaryocyte development and platelet production	3/89	122/8846	0.124445	0.25926	0.189374	H3f3b/Kif21a/Capza2	3	3dpi	NonN_6
R-MMU-4608870	Asymmetric localization of PCP proteins	2/89	61/8846	0.125327	0.25926	0.189374	Uba52/Ubb	2	3dpi	NonN_6
R-MMU-5358346	Hedgehog ligand biogenesis	2/89	61/8846	0.125327	0.25926	0.189374	Uba52/Ubb	2	3dpi	NonN_6
R-MMU-2262752	Cellular responses to stress	8/89	499/8846	0.128317	0.25926	0.189374	Uba52/Lrpprc/Cox8a/H3f3b/Ubb/Capza2/Eef1a1/Mapk10	8	3dpi	NonN_6
R-MMU-1169091	Activation of NF-kappaB in B cells	2/89	62/8846	0.128694	0.25926	0.189374	Uba52/Ubb	2	3dpi	NonN_6
R-MMU-8878166	Transcriptional regulation by RUNX2	2/89	62/8846	0.128694	0.25926	0.189374	Uba52/Ubb	2	3dpi	NonN_6
R-MMU-174084	Autodegradation of Cdh1 by Cdh1:APC/C	2/89	63/8846	0.132083	0.25926	0.189374	Uba52/Ubb	2	3dpi	NonN_6
R-MMU-373760	L1CAM interactions	2/89	63/8846	0.132083	0.25926	0.189374	Actb/Numb	2	3dpi	NonN_6
R-MMU-5693565	Recruitment and ATM-mediated phosphorylation of repair and signaling proteins at DNA double strand breaks	2/89	63/8846	0.132083	0.25926	0.189374	Uba52/Ubb	2	3dpi	NonN_6
R-MMU-69563	p53-Dependent G1 DNA Damage Response	2/89	63/8846	0.132083	0.25926	0.189374	Uba52/Ubb	2	3dpi	NonN_6
R-MMU-69580	p53-Dependent G1/S DNA damage checkpoint	2/89	63/8846	0.132083	0.25926	0.189374	Uba52/Ubb	2	3dpi	NonN_6
R-MMU-9033241	Peroxisomal protein import	2/89	63/8846	0.132083	0.25926	0.189374	Uba52/Ubb	2	3dpi	NonN_6
R-MMU-9663891	Selective autophagy	2/89	63/8846	0.132083	0.25926	0.189374	Uba52/Ubb	2	3dpi	NonN_6
R-MMU-169893	Prolonged ERK activation events	1/89	14/8846	0.132095	0.25926	0.189374	Rap1a	1	3dpi	NonN_6
R-MMU-2730905	Role of LAT2/NTAL/LAB on calcium mobilization	1/89	14/8846	0.132095	0.25926	0.189374	Fcer1g	1	3dpi	NonN_6
R-MMU-399954	Sema3A PAK dependent Axon repulsion	1/89	14/8846	0.132095	0.25926	0.189374	Pak3	1	3dpi	NonN_6
R-MMU-418359	Reduction of cytosolic Ca++ levels	1/89	14/8846	0.132095	0.25926	0.189374	Calm2	1	3dpi	NonN_6
R-MMU-8978934	Metabolism of cofactors	1/89	14/8846	0.132095	0.25926	0.189374	Calm2	1	3dpi	NonN_6
R-MMU-5693606	DNA Double Strand Break Response	2/89	64/8846	0.135492	0.26494	0.193522	Uba52/Ubb	2	3dpi	NonN_6
R-MMU-1234176	Oxygen-dependent proline hydroxylation of Hypoxia-inducible Factor Alpha	2/89	65/8846	0.138921	0.266482	0.194649	Uba52/Ubb	2	3dpi	NonN_6
R-MMU-204998	Cell death signalling via NRAGE, NRIF and NADE	2/89	65/8846	0.138921	0.266482	0.194649	Uba52/Ubb	2	3dpi	NonN_6
R-MMU-2682334	EPH-Ephrin signaling	2/89	65/8846	0.138921	0.266482	0.194649	Actb/Pak3	2	3dpi	NonN_6
R-MMU-69615	G1/S DNA Damage Checkpoints	2/89	65/8846	0.138921	0.266482	0.194649	Uba52/Ubb	2	3dpi	NonN_6
R-MMU-8939236	RUNX1 regulates transcription of genes involved in differentiation of HSCs	2/89	65/8846	0.138921	0.266482	0.194649	Uba52/Ubb	2	3dpi	NonN_6
R-MMU-264642	Acetylcholine Neurotransmitter Release Cycle	1/89	15/8846	0.140841	0.266482	0.194649	Rims1	1	3dpi	NonN_6
R-MMU-354194	GRB2:SOS provides linkage to MAPK signaling for Integrins	1/89	15/8846	0.140841	0.266482	0.194649	Rap1a	1	3dpi	NonN_6
R-MMU-372708	p130Cas linkage to MAPK signaling for integrins	1/89	15/8846	0.140841	0.266482	0.194649	Rap1a	1	3dpi	NonN_6
R-MMU-70221	Glycogen breakdown (glycogenolysis)	1/89	15/8846	0.140841	0.266482	0.194649	Calm2	1	3dpi	NonN_6
R-MMU-5658442	Regulation of RAS by GAPs	2/89	66/8846	0.142369	0.267451	0.195356	Uba52/Ubb	2	3dpi	NonN_6
R-MMU-68867	Assembly of the pre-replicative complex	2/89	66/8846	0.142369	0.267451	0.195356	Uba52/Ubb	2	3dpi	NonN_6
R-MMU-174154	APC/C:Cdc20 mediated degradation of Securin	2/89	67/8846	0.145836	0.271059	0.197992	Uba52/Ubb	2	3dpi	NonN_6
R-MMU-5654738	Signaling by FGFR2	2/89	67/8846	0.145836	0.271059	0.197992	Uba52/Ubb	2	3dpi	NonN_6
R-MMU-8948751	Regulation of PTEN stability and activity	2/89	67/8846	0.145836	0.271059	0.197992	Uba52/Ubb	2	3dpi	NonN_6
R-MMU-199992	trans-Golgi Network Vesicle Budding	2/89	68/8846	0.14932	0.271161	0.198066	Fth1/Clvs1	2	3dpi	NonN_6
R-MMU-8852135	Protein ubiquitination	2/89	68/8846	0.14932	0.271161	0.198066	Uba52/Ubb	2	3dpi	NonN_6
R-MMU-111931	PKA-mediated phosphorylation of CREB	1/89	16/8846	0.149499	0.271161	0.198066	Calm2	1	3dpi	NonN_6
R-MMU-1369062	ABC transporters in lipid homeostasis	1/89	16/8846	0.149499	0.271161	0.198066	Abca9	1	3dpi	NonN_6
R-MMU-163615	PKA activation	1/89	16/8846	0.149499	0.271161	0.198066	Calm2	1	3dpi	NonN_6
R-MMU-202131	Metabolism of nitric oxide: NOS3 activation and regulation	1/89	16/8846	0.149499	0.271161	0.198066	Calm2	1	3dpi	NonN_6
R-MMU-5621575	CD209 (DC-SIGN) signaling	1/89	16/8846	0.149499	0.271161	0.198066	Pak3	1	3dpi	NonN_6
R-MMU-1234174	Cellular response to hypoxia	2/89	69/8846	0.152821	0.274347	0.200394	Uba52/Ubb	2	3dpi	NonN_6
R-MMU-68949	Orc1 removal from chromatin	2/89	69/8846	0.152821	0.274347	0.200394	Uba52/Ubb	2	3dpi	NonN_6
R-MMU-69202	Cyclin E associated events during G1/S transition	2/89	69/8846	0.152821	0.274347	0.200394	Uba52/Ubb	2	3dpi	NonN_6
R-MMU-5628897	TP53 Regulates Metabolic Genes	2/89	70/8846	0.156338	0.276232	0.20177	Lrpprc/Cox8a	2	3dpi	NonN_6
R-MMU-6781827	Transcription-Coupled Nucleotide Excision Repair (TC-NER)	2/89	70/8846	0.156338	0.276232	0.20177	Uba52/Ubb	2	3dpi	NonN_6
R-MMU-1660514	Synthesis of PIPs at the Golgi membrane	1/89	17/8846	0.158072	0.276232	0.20177	Pi4ka	1	3dpi	NonN_6
R-MMU-211979	Eicosanoids	1/89	17/8846	0.158072	0.276232	0.20177	Tbxas1	1	3dpi	NonN_6
R-MMU-2142845	Hyaluronan metabolism	1/89	17/8846	0.158072	0.276232	0.20177	Hexb	1	3dpi	NonN_6
R-MMU-3928664	Ephrin signaling	1/89	17/8846	0.158072	0.276232	0.20177	Pak3	1	3dpi	NonN_6
R-MMU-446353	Cell-extracellular matrix interactions	1/89	17/8846	0.158072	0.276232	0.20177	Actb	1	3dpi	NonN_6
R-MMU-9018677	Biosynthesis of DHA-derived SPMs	1/89	17/8846	0.158072	0.276232	0.20177	Ltc4s	1	3dpi	NonN_6
R-MMU-69656	Cyclin A:Cdk2-associated events at S phase entry	2/89	71/8846	0.159871	0.278451	0.203391	Uba52/Ubb	2	3dpi	NonN_6
R-MMU-174184	Cdc20:Phospho-APC/C mediated degradation of Cyclin A	2/89	72/8846	0.163419	0.282758	0.206537	Uba52/Ubb	2	3dpi	NonN_6
R-MMU-69017	CDK-mediated phosphorylation and removal of Cdc6	2/89	72/8846	0.163419	0.282758	0.206537	Uba52/Ubb	2	3dpi	NonN_6
R-MMU-181429	Serotonin Neurotransmitter Release Cycle	1/89	18/8846	0.166559	0.283329	0.206954	Rims1	1	3dpi	NonN_6
R-MMU-181430	Norepinephrine Neurotransmitter Release Cycle	1/89	18/8846	0.166559	0.283329	0.206954	Rims1	1	3dpi	NonN_6
R-MMU-888590	GABA synthesis, release, reuptake and degradation	1/89	18/8846	0.166559	0.283329	0.206954	Rims1	1	3dpi	NonN_6
R-MMU-9018678	Biosynthesis of specialized proresolving mediators (SPMs)	1/89	18/8846	0.166559	0.283329	0.206954	Ltc4s	1	3dpi	NonN_6
R-MMU-174178	APC/C:Cdh1 mediated degradation of Cdc20 and other APC/C:Cdh1 targeted proteins in late mitosis/early G1	2/89	73/8846	0.166981	0.283329	0.206954	Uba52/Ubb	2	3dpi	NonN_6
R-MMU-179419	APC:Cdc20 mediated degradation of cell cycle proteins prior to satisfation of the cell cycle checkpoint	2/89	73/8846	0.166981	0.283329	0.206954	Uba52/Ubb	2	3dpi	NonN_6
R-MMU-1483255	PI Metabolism	2/89	74/8846	0.170557	0.287541	0.210031	Plekha5/Pi4ka	2	3dpi	NonN_6
R-MMU-8852276	The role of GTSE1 in G2/M progression after G2 checkpoint	2/89	74/8846	0.170557	0.287541	0.210031	Uba52/Ubb	2	3dpi	NonN_6
R-MMU-176409	APC/C:Cdc20 mediated degradation of mitotic proteins	2/89	75/8846	0.174146	0.292654	0.213765	Uba52/Ubb	2	3dpi	NonN_6
R-MMU-8963898	Plasma lipoprotein assembly	1/89	19/8846	0.174961	0.293088	0.214082	Apoe	1	3dpi	NonN_6
R-MMU-176814	Activation of APC/C and APC/C:Cdc20 mediated degradation of mitotic proteins	2/89	76/8846	0.177747	0.29587	0.216115	Uba52/Ubb	2	3dpi	NonN_6
R-MMU-195253	Degradation of beta-catenin by the destruction complex	2/89	76/8846	0.177747	0.29587	0.216115	Uba52/Ubb	2	3dpi	NonN_6
R-MMU-8878159	Transcriptional regulation by RUNX3	2/89	77/8846	0.18136	0.300932	0.219812	Uba52/Ubb	2	3dpi	NonN_6
R-MMU-8982491	Glycogen metabolism	1/89	20/8846	0.18328	0.303161	0.22144	Calm2	1	3dpi	NonN_6
R-MMU-190236	Signaling by FGFR	2/89	79/8846	0.188619	0.309077	0.225762	Uba52/Ubb	2	3dpi	NonN_6
R-MMU-6804756	Regulation of TP53 Activity through Phosphorylation	2/89	79/8846	0.188619	0.309077	0.225762	Uba52/Ubb	2	3dpi	NonN_6
R-MMU-9006936	Signaling by TGFB family members	2/89	79/8846	0.188619	0.309077	0.225762	Uba52/Ubb	2	3dpi	NonN_6
R-MMU-438066	Unblocking of NMDA receptors, glutamate binding and activation	1/89	21/8846	0.191515	0.312848	0.228516	Calm2	1	3dpi	NonN_6
R-MMU-193704	p75 NTR receptor-mediated signalling	2/89	80/8846	0.192264	0.313099	0.228699	Uba52/Ubb	2	3dpi	NonN_6
R-MMU-1474290	Collagen formation	2/89	81/8846	0.195919	0.317087	0.231612	Ctsb/Ctss	2	3dpi	NonN_6
R-MMU-69002	DNA Replication Pre-Initiation	2/89	81/8846	0.195919	0.317087	0.231612	Uba52/Ubb	2	3dpi	NonN_6
R-MMU-450531	Regulation of mRNA stability by proteins that bind AU-rich elements	2/89	82/8846	0.199582	0.322025	0.23522	Uba52/Ubb	2	3dpi	NonN_6
R-MMU-2565942	Regulation of PLK1 Activity at G2/M Transition	2/89	83/8846	0.203254	0.326947	0.238814	Uba52/Ubb	2	3dpi	NonN_6
R-MMU-174143	APC/C-mediated degradation of cell cycle proteins	2/89	84/8846	0.206934	0.32984	0.240928	Uba52/Ubb	2	3dpi	NonN_6
R-MMU-202424	Downstream TCR signaling	2/89	84/8846	0.206934	0.32984	0.240928	Uba52/Ubb	2	3dpi	NonN_6
R-MMU-453276	Regulation of mitotic cell cycle	2/89	84/8846	0.206934	0.32984	0.240928	Uba52/Ubb	2	3dpi	NonN_6
R-MMU-212676	Dopamine Neurotransmitter Release Cycle	1/89	23/8846	0.207741	0.330126	0.241137	Rims1	1	3dpi	NonN_6
R-MMU-1500931	Cell-Cell communication	2/89	85/8846	0.210621	0.333695	0.243743	Actb/Fyb	2	3dpi	NonN_6
R-MMU-4086400	PCP/CE pathway	2/89	86/8846	0.214315	0.335726	0.245227	Uba52/Ubb	2	3dpi	NonN_6
R-MMU-114508	Effects of PIP2 hydrolysis	1/89	24/8846	0.215733	0.335726	0.245227	Dgki	1	3dpi	NonN_6
R-MMU-210500	Glutamate Neurotransmitter Release Cycle	1/89	24/8846	0.215733	0.335726	0.245227	Rims1	1	3dpi	NonN_6
R-MMU-2142691	Synthesis of Leukotrienes (LT) and Eoxins (EX)	1/89	24/8846	0.215733	0.335726	0.245227	Ltc4s	1	3dpi	NonN_6
R-MMU-450282	MAPK targets/ Nuclear events mediated by MAP kinases	1/89	24/8846	0.215733	0.335726	0.245227	Mapk10	1	3dpi	NonN_6
R-MMU-8979227	Triglyceride metabolism	1/89	24/8846	0.215733	0.335726	0.245227	Agmo	1	3dpi	NonN_6
R-MMU-2187338	Visual phototransduction	2/89	87/8846	0.218015	0.338277	0.247091	Apoe/Calm2	2	3dpi	NonN_6
R-MMU-111933	Calmodulin induced events	1/89	25/8846	0.223645	0.343969	0.251248	Calm2	1	3dpi	NonN_6
R-MMU-111997	CaM pathway	1/89	25/8846	0.223645	0.343969	0.251248	Calm2	1	3dpi	NonN_6
R-MMU-418360	Platelet calcium homeostasis	1/89	25/8846	0.223645	0.343969	0.251248	Calm2	1	3dpi	NonN_6
R-MMU-69052	Switching of origins to a post-replicative state	2/89	89/8846	0.225433	0.345707	0.252518	Uba52/Ubb	2	3dpi	NonN_6
R-MMU-5250913	Positive epigenetic regulation of rRNA expression	2/89	90/8846	0.229149	0.349369	0.255193	Actb/H3f3b	2	3dpi	NonN_6
R-MMU-5250924	B-WICH complex positively regulates rRNA expression	2/89	90/8846	0.229149	0.349369	0.255193	Actb/H3f3b	2	3dpi	NonN_6
R-MMU-1489509	DAG and IP3 signaling	1/89	26/8846	0.231478	0.349878	0.255564	Calm2	1	3dpi	NonN_6
R-MMU-187687	Signalling to ERKs	1/89	26/8846	0.231478	0.349878	0.255564	Rap1a	1	3dpi	NonN_6
R-MMU-8963899	Plasma lipoprotein remodeling	1/89	26/8846	0.231478	0.349878	0.255564	Apoe	1	3dpi	NonN_6
R-MMU-397014	Muscle contraction	3/89	166/8846	0.233611	0.35209	0.25718	Cacna1c/Tpm3/Calm2	3	3dpi	NonN_6
R-MMU-8978868	Fatty acid metabolism	3/89	167/8846	0.236286	0.354555	0.258981	Ptgds/Tbxas1/Ltc4s	3	3dpi	NonN_6
R-MMU-611105	Respiratory electron transport	2/89	92/8846	0.236595	0.354555	0.258981	Lrpprc/Cox8a	2	3dpi	NonN_6
R-MMU-111996	Ca-dependent events	1/89	27/8846	0.239233	0.35547	0.259649	Calm2	1	3dpi	NonN_6
R-MMU-1482788	Acyl chain remodelling of PC	1/89	27/8846	0.239233	0.35547	0.259649	Lpcat2	1	3dpi	NonN_6
R-MMU-1855204	Synthesis of IP3 and IP4 in the cytosol	1/89	27/8846	0.239233	0.35547	0.259649	Calm2	1	3dpi	NonN_6
R-MMU-9020702	Interleukin-1 signaling	2/89	94/8846	0.244054	0.361613	0.264136	Uba52/Ubb	2	3dpi	NonN_6
R-MMU-2514859	Inactivation, recovery and regulation of the phototransduction cascade	1/89	28/8846	0.24691	0.363795	0.26573	Calm2	1	3dpi	NonN_6
R-MMU-451326	Activation of kainate receptors upon glutamate binding	1/89	28/8846	0.24691	0.363795	0.26573	Calm2	1	3dpi	NonN_6
R-MMU-5668541	TNFR2 non-canonical NF-kB pathway	2/89	95/8846	0.247788	0.364069	0.26593	Uba52/Ubb	2	3dpi	NonN_6
R-MMU-2022928	HS-GAG biosynthesis	1/89	29/8846	0.254511	0.370839	0.270875	Hs6st3	1	3dpi	NonN_6
R-MMU-2514856	The phototransduction cascade	1/89	29/8846	0.254511	0.370839	0.270875	Calm2	1	3dpi	NonN_6
R-MMU-8964043	Plasma lipoprotein clearance	1/89	29/8846	0.254511	0.370839	0.270875	Apoe	1	3dpi	NonN_6
R-MMU-442755	Activation of NMDA receptors and postsynaptic events	1/89	30/8846	0.262036	0.380749	0.278114	Calm2	1	3dpi	NonN_6
R-MMU-352230	Amino acid transport across the plasma membrane	1/89	31/8846	0.269486	0.390428	0.285184	Slc7a8	1	3dpi	NonN_6
R-MMU-71387	Metabolism of carbohydrates	4/89	262/8846	0.270182	0.390428	0.285184	Aldoa/Hs6st3/Hexb/Calm2	4	3dpi	NonN_6
R-MMU-69206	G1/S Transition	2/89	102/8846	0.273965	0.393731	0.287596	Uba52/Ubb	2	3dpi	NonN_6
R-MMU-9609507	Protein localization	2/89	102/8846	0.273965	0.393731	0.287596	Uba52/Ubb	2	3dpi	NonN_6
R-MMU-389356	CD28 co-stimulation	1/89	32/8846	0.276862	0.39466	0.288275	Pak3	1	3dpi	NonN_6
R-MMU-390522	Striated Muscle Contraction	1/89	32/8846	0.276862	0.39466	0.288275	Tpm3	1	3dpi	NonN_6
R-MMU-418990	Adherens junctions interactions	1/89	32/8846	0.276862	0.39466	0.288275	Actb	1	3dpi	NonN_6
R-MMU-1638074	Keratan sulfate/keratin metabolism	1/89	33/8846	0.284164	0.402885	0.294282	Hexb	1	3dpi	NonN_6
R-MMU-432720	Lysosome Vesicle Biogenesis	1/89	33/8846	0.284164	0.402885	0.294282	Clvs1	1	3dpi	NonN_6
R-MMU-114604	GPVI-mediated activation cascade	1/89	34/8846	0.291393	0.408374	0.298292	Fcer1g	1	3dpi	NonN_6
R-MMU-5673000	RAF activation	1/89	34/8846	0.291393	0.408374	0.298292	Calm2	1	3dpi	NonN_6
R-MMU-70263	Gluconeogenesis	1/89	34/8846	0.291393	0.408374	0.298292	Aldoa	1	3dpi	NonN_6
R-MMU-9013424	RHOV GTPase cycle	1/89	34/8846	0.291393	0.408374	0.298292	Tpm3	1	3dpi	NonN_6
R-MMU-446652	Interleukin-1 family signaling	2/89	107/8846	0.292654	0.408374	0.298292	Uba52/Ubb	2	3dpi	NonN_6
R-MMU-1483257	Phospholipid metabolism	3/89	188/8846	0.29347	0.408374	0.298292	Plekha5/Pi4ka/Lpcat2	3	3dpi	NonN_6
R-MMU-8878171	Transcriptional regulation by RUNX1	3/89	188/8846	0.29347	0.408374	0.298292	Uba52/H3f3b/Ubb	3	3dpi	NonN_6
R-MMU-212165	Epigenetic regulation of gene expression	2/89	108/8846	0.296386	0.411092	0.300277	Actb/H3f3b	2	3dpi	NonN_6
R-MMU-112043	PLC beta mediated events	1/89	35/8846	0.29855	0.411092	0.300277	Calm2	1	3dpi	NonN_6
R-MMU-5663213	RHO GTPases Activate WASPs and WAVEs	1/89	35/8846	0.29855	0.411092	0.300277	Actb	1	3dpi	NonN_6
R-MMU-9013420	RHOU GTPase cycle	1/89	35/8846	0.29855	0.411092	0.300277	Pak3	1	3dpi	NonN_6
R-MMU-6807070	PTEN Regulation	2/89	109/8846	0.300116	0.41217	0.301065	Uba52/Ubb	2	3dpi	NonN_6
R-MMU-5693567	HDR through Homologous Recombination (HRR) or Single Strand Annealing (SSA)	2/89	111/8846	0.307566	0.421302	0.307735	Uba52/Ubb	2	3dpi	NonN_6
R-MMU-3928662	EPHB-mediated forward signaling	1/89	37/8846	0.31265	0.426046	0.3112	Actb	1	3dpi	NonN_6
R-MMU-8875878	MET promotes cell motility	1/89	37/8846	0.31265	0.426046	0.3112	Rap1a	1	3dpi	NonN_6
R-MMU-3700989	Transcriptional Regulation by TP53	4/89	282/8846	0.315514	0.427752	0.312446	Uba52/Lrpprc/Cox8a/Ubb	4	3dpi	NonN_6
R-MMU-5576891	Cardiac conduction	2/89	114/8846	0.318714	0.427752	0.312446	Cacna1c/Calm2	2	3dpi	NonN_6
R-MMU-5693538	Homology Directed Repair	2/89	114/8846	0.318714	0.427752	0.312446	Uba52/Ubb	2	3dpi	NonN_6
R-MMU-69239	Synthesis of DNA	2/89	114/8846	0.318714	0.427752	0.312446	Uba52/Ubb	2	3dpi	NonN_6
R-MMU-8957275	Post-translational protein phosphorylation	2/89	114/8846	0.318714	0.427752	0.312446	Apoe/Cst3	2	3dpi	NonN_6
R-MMU-1660662	Glycosphingolipid metabolism	1/89	38/8846	0.319594	0.427752	0.312446	Hexb	1	3dpi	NonN_6
R-MMU-8853659	RET signaling	1/89	38/8846	0.319594	0.427752	0.312446	Dok6	1	3dpi	NonN_6
R-MMU-163200	Respiratory electron transport, ATP synthesis by chemiosmotic coupling, and heat production by uncoupling proteins.	2/89	116/8846	0.326124	0.435384	0.318021	Lrpprc/Cox8a	2	3dpi	NonN_6
R-MMU-112040	G-protein mediated events	1/89	40/8846	0.333276	0.436389	0.318755	Calm2	1	3dpi	NonN_6
R-MMU-190828	Gap junction trafficking	1/89	40/8846	0.333276	0.436389	0.318755	Actb	1	3dpi	NonN_6
R-MMU-421270	Cell-cell junction organization	1/89	40/8846	0.333276	0.436389	0.318755	Actb	1	3dpi	NonN_6
R-MMU-9696264	RND3 GTPase cycle	1/89	40/8846	0.333276	0.436389	0.318755	Ckb	1	3dpi	NonN_6
R-MMU-975634	Retinoid metabolism and transport	1/89	40/8846	0.333276	0.436389	0.318755	Apoe	1	3dpi	NonN_6
R-MMU-1630316	Glycosaminoglycan metabolism	2/89	118/8846	0.333514	0.436389	0.318755	Hs6st3/Hexb	2	3dpi	NonN_6
R-MMU-1632852	Macroautophagy	2/89	118/8846	0.333514	0.436389	0.318755	Uba52/Ubb	2	3dpi	NonN_6
R-MMU-9612973	Autophagy	2/89	118/8846	0.333514	0.436389	0.318755	Uba52/Ubb	2	3dpi	NonN_6
R-MMU-1474228	Degradation of the extracellular matrix	2/89	119/8846	0.337201	0.440118	0.321479	Ctsb/Ctss	2	3dpi	NonN_6
R-MMU-109704	PI3K Cascade	1/89	41/8846	0.340014	0.442692	0.323359	Pde3b	1	3dpi	NonN_6
R-MMU-381426	Regulation of Insulin-like Growth Factor (IGF) transport and uptake by Insulin-like Growth Factor Binding Proteins (IGFBPs)	2/89	120/8846	0.340881	0.442725	0.323383	Apoe/Cst3	2	3dpi	NonN_6
R-MMU-73887	Death Receptor Signalling	2/89	121/8846	0.344556	0.445859	0.325673	Uba52/Ubb	2	3dpi	NonN_6
R-MMU-112399	IRS-mediated signalling	1/89	42/8846	0.346685	0.445859	0.325673	Pde3b	1	3dpi	NonN_6
R-MMU-157858	Gap junction trafficking and regulation	1/89	42/8846	0.346685	0.445859	0.325673	Actb	1	3dpi	NonN_6
R-MMU-4086398	Ca2+ pathway	1/89	42/8846	0.346685	0.445859	0.325673	Calm2	1	3dpi	NonN_6
R-MMU-69306	DNA Replication	2/89	122/8846	0.348225	0.446747	0.326321	Uba52/Ubb	2	3dpi	NonN_6
R-MMU-112314	Neurotransmitter receptors and postsynaptic signal transmission	2/89	123/8846	0.351887	0.450347	0.32895	Gabrb3/Calm2	2	3dpi	NonN_6
R-MMU-9035034	RHOF GTPase cycle	1/89	43/8846	0.35329	0.451045	0.32946	Actb	1	3dpi	NonN_6
R-MMU-8856688	Golgi-to-ER retrograde transport	2/89	124/8846	0.355542	0.452821	0.330758	Kif21a/Capza2	2	3dpi	NonN_6
R-MMU-3000178	ECM proteoglycans	1/89	44/8846	0.359828	0.456071	0.333132	Sparc	1	3dpi	NonN_6
R-MMU-6806667	Metabolism of fat-soluble vitamins	1/89	44/8846	0.359828	0.456071	0.333132	Apoe	1	3dpi	NonN_6
R-MMU-453279	Mitotic G1 phase and G1/S transition	2/89	126/8846	0.362831	0.458772	0.335104	Uba52/Ubb	2	3dpi	NonN_6
R-MMU-195258	RHO GTPase Effectors	4/89	304/8846	0.36612	0.460048	0.336037	Actb/H3f3b/Calm2/Pak3	4	3dpi	NonN_6
R-MMU-1442490	Collagen degradation	1/89	45/8846	0.366301	0.460048	0.336037	Ctsb	1	3dpi	NonN_6
R-MMU-5357801	Programmed Cell Death	2/89	127/8846	0.366464	0.460048	0.336037	Uba52/Ubb	2	3dpi	NonN_6
R-MMU-1483249	Inositol phosphate metabolism	1/89	46/8846	0.372709	0.465665	0.34014	Calm2	1	3dpi	NonN_6
R-MMU-2428928	IRS-related events triggered by IGF1R	1/89	46/8846	0.372709	0.465665	0.34014	Pde3b	1	3dpi	NonN_6
R-MMU-1793185	Chondroitin sulfate/dermatan sulfate metabolism	1/89	47/8846	0.379053	0.470241	0.343482	Hexb	1	3dpi	NonN_6
R-MMU-2428924	IGF1R signaling cascade	1/89	47/8846	0.379053	0.470241	0.343482	Pde3b	1	3dpi	NonN_6
R-MMU-9013409	RHOJ GTPase cycle	1/89	47/8846	0.379053	0.470241	0.343482	Pak3	1	3dpi	NonN_6
R-MMU-112310	Neurotransmitter release cycle	1/89	48/8846	0.385334	0.472461	0.345104	Rims1	1	3dpi	NonN_6
R-MMU-1660499	Synthesis of PIPs at the plasma membrane	1/89	48/8846	0.385334	0.472461	0.345104	Plekha5	1	3dpi	NonN_6
R-MMU-2404192	Signaling by Type 1 Insulin-like Growth Factor 1 Receptor (IGF1R)	1/89	48/8846	0.385334	0.472461	0.345104	Pde3b	1	3dpi	NonN_6
R-MMU-6811436	COPI-independent Golgi-to-ER retrograde traffic	1/89	48/8846	0.385334	0.472461	0.345104	Capza2	1	3dpi	NonN_6
R-MMU-74751	Insulin receptor signalling cascade	1/89	48/8846	0.385334	0.472461	0.345104	Pde3b	1	3dpi	NonN_6
R-MMU-3371497	HSP90 chaperone cycle for steroid hormone receptors (SHR) in the presence of ligand	1/89	50/8846	0.397708	0.48606	0.355037	Capza2	1	3dpi	NonN_6
R-MMU-425407	SLC-mediated transmembrane transport	3/89	226/8846	0.398274	0.48606	0.355037	Slc7a8/Slc4a10/Calm2	3	3dpi	NonN_6
R-MMU-195721	Signaling by WNT	3/89	227/8846	0.401	0.488255	0.35664	Uba52/Ubb/Calm2	3	3dpi	NonN_6
R-MMU-1638091	Heparan sulfate/heparin (HS-GAG) metabolism	1/89	51/8846	0.403802	0.489401	0.357477	Hs6st3	1	3dpi	NonN_6
R-MMU-350562	Regulation of ornithine decarboxylase (ODC)	1/89	51/8846	0.403802	0.489401	0.357477	Oaz1	1	3dpi	NonN_6
R-MMU-432722	Golgi Associated Vesicle Biogenesis	1/89	52/8846	0.409835	0.492176	0.359505	Fth1	1	3dpi	NonN_6
R-MMU-5578775	Ion homeostasis	1/89	52/8846	0.409835	0.492176	0.359505	Calm2	1	3dpi	NonN_6
R-MMU-913709	O-linked glycosylation of mucins	1/89	52/8846	0.409835	0.492176	0.359505	Galntl6	1	3dpi	NonN_6
R-MMU-983189	Kinesins	1/89	52/8846	0.409835	0.492176	0.359505	Kif21a	1	3dpi	NonN_6
R-MMU-5693532	DNA Double-Strand Break Repair	2/89	140/8846	0.412924	0.494757	0.361389	Uba52/Ubb	2	3dpi	NonN_6
R-MMU-380108	Chemokine receptors bind chemokines	1/89	53/8846	0.415808	0.495573	0.361986	Cx3cr1	1	3dpi	NonN_6
R-MMU-936837	Ion transport by P-type ATPases	1/89	53/8846	0.415808	0.495573	0.361986	Calm2	1	3dpi	NonN_6
R-MMU-69242	S Phase	2/89	141/8846	0.416432	0.495573	0.361986	Uba52/Ubb	2	3dpi	NonN_6
R-MMU-5633007	Regulation of TP53 Activity	2/89	143/8846	0.423417	0.502748	0.367226	Uba52/Ubb	2	3dpi	NonN_6
R-MMU-5620924	Intraflagellar transport	1/89	55/8846	0.427575	0.505403	0.369166	Dync2h1	1	3dpi	NonN_6
R-MMU-977443	GABA receptor activation	1/89	55/8846	0.427575	0.505403	0.369166	Gabrb3	1	3dpi	NonN_6
R-MMU-5688426	Deubiquitination	3/89	241/8846	0.438786	0.515559	0.376584	Actb/Uba52/Ubb	3	3dpi	NonN_6
R-MMU-2029482	Regulation of actin dynamics for phagocytic cup formation	1/89	57/8846	0.439107	0.515559	0.376584	Actb	1	3dpi	NonN_6
R-MMU-388841	Costimulation by the CD28 family	1/89	57/8846	0.439107	0.515559	0.376584	Pak3	1	3dpi	NonN_6
R-MMU-201681	TCF dependent signaling in response to WNT	2/89	150/8846	0.447525	0.524272	0.382948	Uba52/Ubb	2	3dpi	NonN_6
R-MMU-187037	Signaling by NTRK1 (TRKA)	1/89	59/8846	0.45041	0.525312	0.383708	Rap1a	1	3dpi	NonN_6
R-MMU-351202	Metabolism of polyamines	1/89	59/8846	0.45041	0.525312	0.383708	Oaz1	1	3dpi	NonN_6
R-MMU-69481	G2/M Checkpoints	2/89	152/8846	0.454311	0.52869	0.386175	Uba52/Ubb	2	3dpi	NonN_6
R-MMU-174824	Plasma lipoprotein assembly, remodeling, and clearance	1/89	60/8846	0.455976	0.529456	0.386735	Apoe	1	3dpi	NonN_6
R-MMU-71291	Metabolism of amino acids and derivatives	3/89	248/8846	0.457359	0.529892	0.387054	Oaz1/Ckb/Serinc3	3	3dpi	NonN_6
R-MMU-9006925	Intracellular signaling by second messengers	3/89	249/8846	0.459993	0.531772	0.388427	Uba52/Ubb/Calm2	3	3dpi	NonN_6
R-MMU-70171	Glycolysis	1/89	61/8846	0.461487	0.53233	0.388834	Aldoa	1	3dpi	NonN_6
R-MMU-427413	NoRC negatively regulates rRNA expression	1/89	62/8846	0.466943	0.537444	0.39257	H3f3b	1	3dpi	NonN_6
R-MMU-73728	RNA Polymerase I Promoter Opening	1/89	63/8846	0.472344	0.540956	0.395135	H3f3b	1	3dpi	NonN_6
R-MMU-446203	Asparagine N-linked glycosylation	3/89	254/8846	0.47308	0.540956	0.395135	Uba52/Ubb/Capza2	3	3dpi	NonN_6
R-MMU-449147	Signaling by Interleukins	3/89	254/8846	0.47308	0.540956	0.395135	Uba52/Ubb/Mapk10	3	3dpi	NonN_6
R-MMU-427359	SIRT1 negatively regulates rRNA expression	1/89	64/8846	0.477691	0.54453	0.397746	H3f3b	1	3dpi	NonN_6
R-MMU-1474244	Extracellular matrix organization	3/89	256/8846	0.478276	0.54453	0.397746	Sparc/Ctsb/Ctss	3	3dpi	NonN_6
R-MMU-446728	Cell junction organization	1/89	65/8846	0.482984	0.547521	0.39993	Actb	1	3dpi	NonN_6
R-MMU-5250941	Negative epigenetic regulation of rRNA expression	1/89	65/8846	0.482984	0.547521	0.39993	H3f3b	1	3dpi	NonN_6
R-MMU-5625886	Activated PKN1 stimulates transcription of AR (androgen receptor) regulated genes KLK2 and KLK3	1/89	66/8846	0.488224	0.552271	0.4034	H3f3b	1	3dpi	NonN_6
R-MMU-9009391	Extra-nuclear estrogen signaling	1/89	67/8846	0.493412	0.556941	0.406811	Calm2	1	3dpi	NonN_6
R-MMU-196854	Metabolism of vitamins and cofactors	2/89	165/8846	0.497249	0.560071	0.409097	Apoe/Calm2	2	3dpi	NonN_6
R-MMU-111885	Opioid Signalling	1/89	68/8846	0.498548	0.560333	0.409289	Calm2	1	3dpi	NonN_6
R-MMU-1428517	The citric acid (TCA) cycle and respiratory electron transport	2/89	167/8846	0.503666	0.564879	0.41261	Lrpprc/Cox8a	2	3dpi	NonN_6
R-MMU-418346	Platelet homeostasis	1/89	70/8846	0.508665	0.568382	0.415168	Calm2	1	3dpi	NonN_6
R-MMU-418594	G alpha (i) signalling events	3/89	268/8846	0.50895	0.568382	0.415168	Cx3cr1/Calm2/Grm7	3	3dpi	NonN_6
R-MMU-166520	Signaling by NTRKs	1/89	71/8846	0.513648	0.571202	0.417228	Rap1a	1	3dpi	NonN_6
R-MMU-211897	Cytochrome P450 - arranged by substrate type	1/89	71/8846	0.513648	0.571202	0.417228	Tbxas1	1	3dpi	NonN_6
R-MMU-74752	Signaling by Insulin receptor	1/89	72/8846	0.518581	0.575471	0.420346	Pde3b	1	3dpi	NonN_6
R-MMU-212300	PRC2 methylates histones and DNA	1/89	74/8846	0.528298	0.584358	0.426837	H3f3b	1	3dpi	NonN_6
R-MMU-69275	G2/M Transition	2/89	175/8846	0.52881	0.584358	0.426837	Uba52/Ubb	2	3dpi	NonN_6
R-MMU-453274	Mitotic G2-G2/M phases	2/89	177/8846	0.534963	0.588683	0.429997	Uba52/Ubb	2	3dpi	NonN_6
R-MMU-6811442	Intra-Golgi and retrograde Golgi-to-ER traffic	2/89	177/8846	0.534963	0.588683	0.429997	Kif21a/Capza2	2	3dpi	NonN_6
R-MMU-5689880	Ub-specific processing proteases	2/89	179/8846	0.541061	0.594151	0.43399	Uba52/Ubb	2	3dpi	NonN_6
R-MMU-2029480	Fcgamma receptor (FCGR) dependent phagocytosis	1/89	77/8846	0.542512	0.594503	0.434248	Actb	1	3dpi	NonN_6
R-MMU-2467813	Separation of Sister Chromatids	2/89	181/8846	0.547105	0.59829	0.437014	Uba52/Ubb	2	3dpi	NonN_6
R-MMU-8936459	RUNX1 regulates genes involved in megakaryocyte differentiation and platelet function	1/89	79/8846	0.551752	0.60212	0.439811	H3f3b	1	3dpi	NonN_6
R-MMU-8939211	ESR-mediated signaling	2/89	183/8846	0.553094	0.602335	0.439968	H3f3b/Calm2	2	3dpi	NonN_6
R-MMU-70326	Glucose metabolism	1/89	80/8846	0.556303	0.604577	0.441606	Aldoa	1	3dpi	NonN_6
R-MMU-3371556	Cellular response to heat stress	1/89	82/8846	0.565267	0.613052	0.447797	Eef1a1	1	3dpi	NonN_6
R-MMU-428157	Sphingolipid metabolism	1/89	83/8846	0.569682	0.616436	0.450269	Hexb	1	3dpi	NonN_6
R-MMU-416476	G alpha (q) signalling events	2/89	189/8846	0.570731	0.616436	0.450269	Dgki/Grm5	2	3dpi	NonN_6
R-MMU-5625740	RHO GTPases activate PKNs	1/89	84/8846	0.574052	0.618753	0.451961	H3f3b	1	3dpi	NonN_6
R-MMU-73894	DNA Repair	3/89	298/8846	0.581355	0.625343	0.456774	Actb/Uba52/Ubb	3	3dpi	NonN_6
R-MMU-73772	RNA Polymerase I Promoter Escape	1/89	89/8846	0.595255	0.638988	0.466741	H3f3b	1	3dpi	NonN_6
R-MMU-6807878	COPI-mediated anterograde transport	1/89	90/8846	0.599368	0.642093	0.469009	Capza2	1	3dpi	NonN_6
R-MMU-9012999	RHO GTPase cycle	4/89	413/8846	0.602516	0.643833	0.47028	Ckb/Actb/Tpm3/Pak3	4	3dpi	NonN_6
R-MMU-6811434	COPI-dependent Golgi-to-ER retrograde traffic	1/89	91/8846	0.603441	0.643833	0.47028	Kif21a	1	3dpi	NonN_6
R-MMU-5173105	O-linked glycosylation	1/89	93/8846	0.611463	0.651071	0.475567	Galntl6	1	3dpi	NonN_6
R-MMU-68882	Mitotic Anaphase	2/89	213/8846	0.636257	0.676088	0.493841	Uba52/Ubb	2	3dpi	NonN_6
R-MMU-198933	Immunoregulatory interactions between a Lymphoid and a non-Lymphoid cell	1/89	100/8846	0.638296	0.676088	0.493841	Cd81	1	3dpi	NonN_6
R-MMU-2555396	Mitotic Metaphase and Anaphase	2/89	214/8846	0.638813	0.676088	0.493841	Uba52/Ubb	2	3dpi	NonN_6
R-MMU-8951664	Neddylation	2/89	216/8846	0.643883	0.680085	0.49676	Uba52/Ubb	2	3dpi	NonN_6
R-MMU-5578749	Transcriptional regulation by small RNAs	1/89	105/8846	0.656333	0.690463	0.50434	H3f3b	1	3dpi	NonN_6
R-MMU-73854	RNA Polymerase I Promoter Clearance	1/89	105/8846	0.656333	0.690463	0.50434	H3f3b	1	3dpi	NonN_6
R-MMU-73864	RNA Polymerase I Transcription	1/89	106/8846	0.659833	0.692758	0.506017	H3f3b	1	3dpi	NonN_6
R-MMU-1257604	PIP3 activates AKT signaling	2/89	223/8846	0.661193	0.692803	0.50605	Uba52/Ubb	2	3dpi	NonN_6
R-MMU-211945	Phase I - Functionalization of compounds	1/89	107/8846	0.663296	0.693626	0.506651	Tbxas1	1	3dpi	NonN_6
R-MMU-9006931	Signaling by Nuclear Receptors	2/89	232/8846	0.682464	0.711777	0.519909	H3f3b/Calm2	2	3dpi	NonN_6
R-MMU-211000	Gene Silencing by RNA	1/89	113/8846	0.68336	0.711777	0.519909	H3f3b	1	3dpi	NonN_6
R-MMU-1483206	Glycerophospholipid biosynthesis	1/89	115/8846	0.689781	0.715631	0.522724	Lpcat2	1	3dpi	NonN_6
R-MMU-9018519	Estrogen-dependent gene expression	1/89	115/8846	0.689781	0.715631	0.522724	H3f3b	1	3dpi	NonN_6
R-MMU-418555	G alpha (s) signalling events	1/89	118/8846	0.699172	0.723946	0.528798	Pde3b	1	3dpi	NonN_6
R-MMU-5663220	RHO GTPases Activate Formins	1/89	131/8846	0.736724	0.76133	0.556104	Actb	1	3dpi	NonN_6
R-MMU-500792	GPCR ligand binding	3/89	380/8846	0.742664	0.765963	0.559489	Grm5/Cx3cr1/Grm7	3	3dpi	NonN_6
R-MMU-1280215	Cytokine Signaling in Immune system	3/89	381/8846	0.744289	0.766137	0.559616	Uba52/Ubb/Mapk10	3	3dpi	NonN_6
R-MMU-9013148	CDC42 GTPase cycle	1/89	138/8846	0.754984	0.775628	0.566548	Pak3	1	3dpi	NonN_6
R-MMU-69620	Cell Cycle Checkpoints	2/89	270/8846	0.760618	0.779893	0.569663	Uba52/Ubb	2	3dpi	NonN_6
R-MMU-199977	ER to Golgi Anterograde Transport	1/89	142/8846	0.76485	0.782706	0.571718	Capza2	1	3dpi	NonN_6
R-MMU-983168	Antigen processing: Ubiquitination & Proteasome degradation	2/89	283/8846	0.783312	0.800043	0.584382	Uba52/Ubb	2	3dpi	NonN_6
R-MMU-9013149	RAC1 GTPase cycle	1/89	166/8846	0.816314	0.832134	0.607822	Pak3	1	3dpi	NonN_6
R-MMU-948021	Transport to the Golgi and subsequent modification	1/89	170/8846	0.823734	0.838073	0.612161	Capza2	1	3dpi	NonN_6
R-MMU-375276	Peptide ligand-binding receptors	1/89	184/8846	0.847444	0.860532	0.628566	Cx3cr1	1	3dpi	NonN_6
R-MMU-5617833	Cilium Assembly	1/89	194/8846	0.862421	0.874053	0.638442	Dync2h1	1	3dpi	NonN_6
R-MMU-983169	Class I MHC mediated antigen processing & presentation	2/89	342/8846	0.864313	0.874286	0.638612	Uba52/Ubb	2	3dpi	NonN_6
R-MMU-211859	Biological oxidations	1/89	204/8846	0.875943	0.884349	0.645962	Tbxas1	1	3dpi	NonN_6
R-MMU-1852241	Organelle biogenesis and maintenance	1/89	222/8846	0.897052	0.903926	0.660262	Dync2h1	1	3dpi	NonN_6
R-MMU-68886	M Phase	2/89	380/8846	0.900837	0.906004	0.66178	Uba52/Ubb	2	3dpi	NonN_6
R-MMU-9709957	Sensory Perception	2/89	456/8846	0.948261	0.95188	0.69529	Apoe/Calm2	2	3dpi	NonN_6
R-MMU-373076	Class A/1 (Rhodopsin-like receptors)	1/89	297/8846	0.952874	0.954689	0.697341	Cx3cr1	1	3dpi	NonN_6
R-MMU-69278	Cell Cycle, Mitotic	2/89	496/8846	0.963657	0.963657	0.703892	Uba52/Ubb	2	3dpi	NonN_6
R-MMU-418885	DCC mediated attractive signaling	1/4	11/8846	0.00496557	0.042215	0.0148123	Dcc	1	3dpi	NonN_5
R-MMU-3000170	Syndecan interactions	1/4	16/8846	0.00721652	0.042215	0.0148123	Vtn	1	3dpi	NonN_5
R-MMU-5357769	Caspase activation via extrinsic apoptotic signalling pathway	1/4	18/8846	0.00811583	0.042215	0.0148123	Dcc	1	3dpi	NonN_5
R-MMU-373752	Netrin-1 signaling	1/4	23/8846	0.0103614	0.042215	0.0148123	Dcc	1	3dpi	NonN_5
R-MMU-2022928	HS-GAG biosynthesis	1/4	29/8846	0.0130511	0.042215	0.0148123	Ext1	1	3dpi	NonN_5
R-MMU-977606	Regulation of Complement cascade	1/4	32/8846	0.0143939	0.042215	0.0148123	Vtn	1	3dpi	NonN_5
R-MMU-2129379	Molecules associated with elastic fibres	1/4	35/8846	0.0157353	0.042215	0.0148123	Vtn	1	3dpi	NonN_5
R-MMU-3000171	Non-integrin membrane-ECM interactions	1/4	38/8846	0.0170754	0.042215	0.0148123	Vtn	1	3dpi	NonN_5
R-MMU-166658	Complement cascade	1/4	41/8846	0.0184141	0.042215	0.0148123	Vtn	1	3dpi	NonN_5
R-MMU-1566948	Elastic fibre formation	1/4	42/8846	0.01886	0.042215	0.0148123	Vtn	1	3dpi	NonN_5
R-MMU-3000178	ECM proteoglycans	1/4	44/8846	0.0197514	0.042215	0.0148123	Vtn	1	3dpi	NonN_5
R-MMU-1660499	Synthesis of PIPs at the plasma membrane	1/4	48/8846	0.0215323	0.042215	0.0148123	Plekha6	1	3dpi	NonN_5
R-MMU-1638091	Heparan sulfate/heparin (HS-GAG) metabolism	1/4	51/8846	0.0228664	0.042215	0.0148123	Ext1	1	3dpi	NonN_5
R-MMU-216083	Integrin cell surface interactions	1/4	70/8846	0.0312842	0.0528791	0.0185541	Vtn	1	3dpi	NonN_5
R-MMU-1483255	PI Metabolism	1/4	74/8846	0.0330494	0.0528791	0.0185541	Plekha6	1	3dpi	NonN_5
R-MMU-109581	Apoptosis	1/4	100/8846	0.0444646	0.0666969	0.0234024	Dcc	1	3dpi	NonN_5
R-MMU-1630316	Glycosaminoglycan metabolism	1/4	118/8846	0.052308	0.0738466	0.0259111	Ext1	1	3dpi	NonN_5
R-MMU-5357801	Programmed Cell Death	1/4	127/8846	0.0562115	0.0749487	0.0262978	Dcc	1	3dpi	NonN_5
R-MMU-1483257	Phospholipid metabolism	1/4	188/8846	0.0823519	0.104023	0.0364994	Plekha6	1	3dpi	NonN_5
R-MMU-1474244	Extracellular matrix organization	1/4	256/8846	0.110848	0.118257	0.0414938	Vtn	1	3dpi	NonN_5
R-MMU-422475	Axon guidance	1/4	256/8846	0.110848	0.118257	0.0414938	Dcc	1	3dpi	NonN_5
R-MMU-9675108	Nervous system development	1/4	257/8846	0.111262	0.118257	0.0414938	Dcc	1	3dpi	NonN_5
R-MMU-71387	Metabolism of carbohydrates	1/4	262/8846	0.11333	0.118257	0.0414938	Ext1	1	3dpi	NonN_5
R-MMU-1266738	Developmental Biology	1/4	454/8846	0.19005	0.19005	0.0666842	Dcc	1	3dpi	NonN_5
R-MMU-9707564	Cytoprotection by HMOX1	3/5	107/8846	1.6908e-05	0.00478129	0.00124146	Cox8a/Cox7c/Ubb	3	3dpi	NonN_4
R-MMU-9711123	Cellular response to chemical stress	3/5	139/8846	3.71063e-05	0.00478129	0.00124146	Cox8a/Cox7c/Ubb	3	3dpi	NonN_4
R-MMU-2262752	Cellular responses to stress	4/5	499/8846	4.78129e-05	0.00478129	0.00124146	Cox8a/Cox7c/Ubb/Dynll1	4	3dpi	NonN_4
R-MMU-9646399	Aggrephagy	2/5	36/8846	0.000159802	0.0119852	0.00311194	Ubb/Dynll1	2	3dpi	NonN_4
R-MMU-3700989	Transcriptional Regulation by TP53	3/5	282/8846	0.000305658	0.0183395	0.00476183	Cox8a/Cox7c/Ubb	3	3dpi	NonN_4
R-MMU-9663891	Selective autophagy	2/5	63/8846	0.000492363	0.0246182	0.00639208	Ubb/Dynll1	2	3dpi	NonN_4
R-MMU-5628897	TP53 Regulates Metabolic Genes	2/5	70/8846	0.00060787	0.0260516	0.00676426	Cox8a/Cox7c	2	3dpi	NonN_4
R-MMU-2565942	Regulation of PLK1 Activity at G2/M Transition	2/5	83/8846	0.00085403	0.0320261	0.00831555	Ubb/Dynll1	2	3dpi	NonN_4
R-MMU-611105	Respiratory electron transport	2/5	92/8846	0.00104839	0.0349463	0.00907377	Cox8a/Cox7c	2	3dpi	NonN_4
R-MMU-163200	Respiratory electron transport, ATP synthesis by chemiosmotic coupling, and heat production by uncoupling proteins.	2/5	116/8846	0.00166141	0.0429667	0.0111563	Cox8a/Cox7c	2	3dpi	NonN_4
R-MMU-1632852	Macroautophagy	2/5	118/8846	0.00171867	0.0429667	0.0111563	Ubb/Dynll1	2	3dpi	NonN_4
R-MMU-9612973	Autophagy	2/5	118/8846	0.00171867	0.0429667	0.0111563	Ubb/Dynll1	2	3dpi	NonN_4
R-MMU-5357801	Programmed Cell Death	2/5	127/8846	0.00198796	0.0458761	0.0119117	Ubb/Dynll1	2	3dpi	NonN_4
R-MMU-1428517	The citric acid (TCA) cycle and respiratory electron transport	2/5	167/8846	0.0034127	0.0572343	0.0148608	Cox8a/Cox7c	2	3dpi	NonN_4
R-MMU-69275	G2/M Transition	2/5	175/8846	0.00374168	0.0572343	0.0148608	Ubb/Dynll1	2	3dpi	NonN_4
R-MMU-453274	Mitotic G2-G2/M phases	2/5	177/8846	0.0038262	0.0572343	0.0148608	Ubb/Dynll1	2	3dpi	NonN_4
R-MMU-2467813	Separation of Sister Chromatids	2/5	181/8846	0.00399793	0.0572343	0.0148608	Ubb/Dynll1	2	3dpi	NonN_4
R-MMU-68882	Mitotic Anaphase	2/5	213/8846	0.00550075	0.0572343	0.0148608	Ubb/Dynll1	2	3dpi	NonN_4
R-MMU-2555396	Mitotic Metaphase and Anaphase	2/5	214/8846	0.00555138	0.0572343	0.0148608	Ubb/Dynll1	2	3dpi	NonN_4
R-MMU-5689877	Josephin domain DUBs	1/5	10/8846	0.00564078	0.0572343	0.0148608	Ubb	1	3dpi	NonN_4
R-MMU-9708530	Regulation of BACH1 activity	1/5	10/8846	0.00564078	0.0572343	0.0148608	Ubb	1	3dpi	NonN_4
R-MMU-3134975	Regulation of innate immune responses to cytosolic DNA	1/5	11/8846	0.00620345	0.0572343	0.0148608	Ubb	1	3dpi	NonN_4
R-MMU-5684264	MAP3K8 (TPL2)-dependent MAPK1/3 activation	1/5	11/8846	0.00620345	0.0572343	0.0148608	Ubb	1	3dpi	NonN_4
R-MMU-209543	p75NTR recruits signalling complexes	1/5	12/8846	0.00676588	0.0572343	0.0148608	Ubb	1	3dpi	NonN_4
R-MMU-209560	NF-kB is activated and signals survival	1/5	12/8846	0.00676588	0.0572343	0.0148608	Ubb	1	3dpi	NonN_4
R-MMU-937039	IRAK1 recruits IKK complex	1/5	12/8846	0.00676588	0.0572343	0.0148608	Ubb	1	3dpi	NonN_4
R-MMU-975144	IRAK1 recruits IKK complex upon TLR7/8 or 9 stimulation	1/5	12/8846	0.00676588	0.0572343	0.0148608	Ubb	1	3dpi	NonN_4
R-MMU-205043	NRIF signals cell death from the nucleus	1/5	13/8846	0.00732804	0.0572343	0.0148608	Ubb	1	3dpi	NonN_4
R-MMU-2173791	TGF-beta receptor signaling in EMT (epithelial to mesenchymal transition)	1/5	13/8846	0.00732804	0.0572343	0.0148608	Ubb	1	3dpi	NonN_4
R-MMU-936440	Negative regulators of DDX58/IFIH1 signaling	1/5	13/8846	0.00732804	0.0572343	0.0148608	Ubb	1	3dpi	NonN_4
R-MMU-9706369	Negative regulation of FLT3	1/5	13/8846	0.00732804	0.0572343	0.0148608	Ubb	1	3dpi	NonN_4
R-MMU-975163	IRAK2 mediated activation of TAK1 complex upon TLR7/8 or 9 stimulation	1/5	13/8846	0.00732804	0.0572343	0.0148608	Ubb	1	3dpi	NonN_4
R-MMU-446203	Asparagine N-linked glycosylation	2/5	254/8846	0.00775498	0.0572343	0.0148608	Ubb/Dynll1	2	3dpi	NonN_4
R-MMU-110312	Translesion synthesis by REV1	1/5	14/8846	0.00788995	0.0572343	0.0148608	Ubb	1	3dpi	NonN_4
R-MMU-2173788	Downregulation of TGF-beta receptor signaling	1/5	14/8846	0.00788995	0.0572343	0.0148608	Ubb	1	3dpi	NonN_4
R-MMU-2559585	Oncogene Induced Senescence	1/5	14/8846	0.00788995	0.0572343	0.0148608	Ubb	1	3dpi	NonN_4
R-MMU-532668	N-glycan trimming in the ER and Calnexin/Calreticulin cycle	1/5	14/8846	0.00788995	0.0572343	0.0148608	Ubb	1	3dpi	NonN_4
R-MMU-937072	TRAF6-mediated induction of TAK1 complex within TLR4 complex	1/5	14/8846	0.00788995	0.0572343	0.0148608	Ubb	1	3dpi	NonN_4
R-MMU-1295596	Spry regulation of FGF signaling	1/5	15/8846	0.00845161	0.0572343	0.0148608	Ubb	1	3dpi	NonN_4
R-MMU-193639	p75NTR signals via NF-kB	1/5	15/8846	0.00845161	0.0572343	0.0148608	Ubb	1	3dpi	NonN_4
R-MMU-5655862	Translesion synthesis by POLK	1/5	15/8846	0.00845161	0.0572343	0.0148608	Ubb	1	3dpi	NonN_4
R-MMU-5656121	Translesion synthesis by POLI	1/5	15/8846	0.00845161	0.0572343	0.0148608	Ubb	1	3dpi	NonN_4
R-MMU-936964	Activation of IRF3/IRF7 mediated by TBK1/IKK epsilon	1/5	15/8846	0.00845161	0.0572343	0.0148608	Ubb	1	3dpi	NonN_4
R-MMU-69620	Cell Cycle Checkpoints	2/5	270/8846	0.00873269	0.0572343	0.0148608	Ubb/Dynll1	2	3dpi	NonN_4
R-MMU-110320	Translesion Synthesis by POLH	1/5	17/8846	0.00957416	0.0572343	0.0148608	Ubb	1	3dpi	NonN_4
R-MMU-2173795	Downregulation of SMAD2/3:SMAD4 transcriptional activity	1/5	17/8846	0.00957416	0.0572343	0.0148608	Ubb	1	3dpi	NonN_4
R-MMU-6804760	Regulation of TP53 Activity through Methylation	1/5	17/8846	0.00957416	0.0572343	0.0148608	Ubb	1	3dpi	NonN_4
R-MMU-114452	Activation of BH3-only proteins	1/5	18/8846	0.0101351	0.0572343	0.0148608	Dynll1	1	3dpi	NonN_4
R-MMU-1980143	Signaling by NOTCH1	1/5	18/8846	0.0101351	0.0572343	0.0148608	Ubb	1	3dpi	NonN_4
R-MMU-376176	Signaling by ROBO receptors	1/5	18/8846	0.0101351	0.0572343	0.0148608	Ubb	1	3dpi	NonN_4
R-MMU-9012852	Signaling by NOTCH3	1/5	18/8846	0.0101351	0.0572343	0.0148608	Ubb	1	3dpi	NonN_4
R-MMU-9013507	NOTCH3 Activation and Transmission of Signal to the Nucleus	1/5	18/8846	0.0101351	0.0572343	0.0148608	Ubb	1	3dpi	NonN_4
R-MMU-4641263	Regulation of FZD by ubiquitination	1/5	19/8846	0.0106957	0.0572343	0.0148608	Ubb	1	3dpi	NonN_4
R-MMU-5696397	Gap-filling DNA repair synthesis and ligation in GG-NER	1/5	19/8846	0.0106957	0.0572343	0.0148608	Ubb	1	3dpi	NonN_4
R-MMU-6807004	Negative regulation of MET activity	1/5	19/8846	0.0106957	0.0572343	0.0148608	Ubb	1	3dpi	NonN_4
R-MMU-9705462	Inactivation of CSF3 (G-CSF) signaling	1/5	19/8846	0.0106957	0.0572343	0.0148608	Ubb	1	3dpi	NonN_4
R-MMU-450321	JNK (c-Jun kinases) phosphorylation and activation mediated by activated human TAK1	1/5	20/8846	0.0112561	0.0572343	0.0148608	Ubb	1	3dpi	NonN_4
R-MMU-912631	Regulation of signaling by CBL	1/5	20/8846	0.0112561	0.0572343	0.0148608	Ubb	1	3dpi	NonN_4
R-MMU-937041	IKK complex recruitment mediated by RIP1	1/5	20/8846	0.0112561	0.0572343	0.0148608	Ubb	1	3dpi	NonN_4
R-MMU-2173789	TGF-beta receptor signaling activates SMADs	1/5	21/8846	0.0118162	0.0581125	0.0150889	Ubb	1	3dpi	NonN_4
R-MMU-450302	activated TAK1 mediates p38 MAPK activation	1/5	21/8846	0.0118162	0.0581125	0.0150889	Ubb	1	3dpi	NonN_4
R-MMU-2173796	SMAD2/SMAD3:SMAD4 heterotrimer regulates transcription	1/5	22/8846	0.0123761	0.0595874	0.0154718	Ubb	1	3dpi	NonN_4
R-MMU-174048	APC/C:Cdc20 mediated degradation of Cyclin B	1/5	23/8846	0.0129357	0.0595874	0.0154718	Ubb	1	3dpi	NonN_4
R-MMU-9674555	Signaling by CSF3 (G-CSF)	1/5	23/8846	0.0129357	0.0595874	0.0154718	Ubb	1	3dpi	NonN_4
R-MMU-8863795	Downregulation of ERBB2 signaling	1/5	24/8846	0.0134951	0.0595874	0.0154718	Ubb	1	3dpi	NonN_4
R-MMU-179409	APC-Cdc20 mediated degradation of Nek2A	1/5	25/8846	0.0140542	0.0595874	0.0154718	Ubb	1	3dpi	NonN_4
R-MMU-9648002	RAS processing	1/5	26/8846	0.0146131	0.0595874	0.0154718	Ubb	1	3dpi	NonN_4
R-MMU-110314	Recognition of DNA damage by PCNA-containing replication complex	1/5	27/8846	0.0151717	0.0595874	0.0154718	Ubb	1	3dpi	NonN_4
R-MMU-445989	TAK1 activates NFkB by phosphorylation and activation of IKKs complex	1/5	27/8846	0.0151717	0.0595874	0.0154718	Ubb	1	3dpi	NonN_4
R-MMU-5213460	RIPK1-mediated regulated necrosis	1/5	27/8846	0.0151717	0.0595874	0.0154718	Ubb	1	3dpi	NonN_4
R-MMU-5654732	Negative regulation of FGFR3 signaling	1/5	27/8846	0.0151717	0.0595874	0.0154718	Ubb	1	3dpi	NonN_4
R-MMU-5675482	Regulation of necroptotic cell death	1/5	27/8846	0.0151717	0.0595874	0.0154718	Ubb	1	3dpi	NonN_4
R-MMU-1834949	Cytosolic sensors of pathogen-associated DNA	1/5	28/8846	0.01573	0.0595874	0.0154718	Ubb	1	3dpi	NonN_4
R-MMU-5357956	TNFR1-induced NFkappaB signaling pathway	1/5	28/8846	0.01573	0.0595874	0.0154718	Ubb	1	3dpi	NonN_4
R-MMU-5689896	Ovarian tumor domain proteases	1/5	28/8846	0.01573	0.0595874	0.0154718	Ubb	1	3dpi	NonN_4
R-MMU-9607240	FLT3 Signaling	1/5	28/8846	0.01573	0.0595874	0.0154718	Ubb	1	3dpi	NonN_4
R-MMU-1236394	Signaling by ERBB4	1/5	29/8846	0.0162881	0.0595874	0.0154718	Ubb	1	3dpi	NonN_4
R-MMU-3769402	Deactivation of the beta-catenin transactivating complex	1/5	29/8846	0.0162881	0.0595874	0.0154718	Ubb	1	3dpi	NonN_4
R-MMU-5656169	Termination of translesion DNA synthesis	1/5	29/8846	0.0162881	0.0595874	0.0154718	Ubb	1	3dpi	NonN_4
R-MMU-8866652	Synthesis of active ubiquitin: roles of E1 and E2 enzymes	1/5	29/8846	0.0162881	0.0595874	0.0154718	Ubb	1	3dpi	NonN_4
R-MMU-917729	Endosomal Sorting Complex Required For Transport (ESCRT)	1/5	29/8846	0.0162881	0.0595874	0.0154718	Ubb	1	3dpi	NonN_4
R-MMU-182971	EGFR downregulation	1/5	30/8846	0.016846	0.0595874	0.0154718	Ubb	1	3dpi	NonN_4
R-MMU-5654726	Negative regulation of FGFR1 signaling	1/5	30/8846	0.016846	0.0595874	0.0154718	Ubb	1	3dpi	NonN_4
R-MMU-5654733	Negative regulation of FGFR4 signaling	1/5	30/8846	0.016846	0.0595874	0.0154718	Ubb	1	3dpi	NonN_4
R-MMU-68886	M Phase	2/5	380/8846	0.0168831	0.0595874	0.0154718	Ubb/Dynll1	2	3dpi	NonN_4
R-MMU-168928	DDX58/IFIH1-mediated induction of interferon-alpha/beta	1/5	31/8846	0.0174036	0.0602363	0.0156403	Ubb	1	3dpi	NonN_4
R-MMU-168638	NOD1/2 Signaling Pathway	1/5	32/8846	0.0179609	0.0602363	0.0156403	Ubb	1	3dpi	NonN_4
R-MMU-5654727	Negative regulation of FGFR2 signaling	1/5	32/8846	0.0179609	0.0602363	0.0156403	Ubb	1	3dpi	NonN_4
R-MMU-2173793	Transcriptional activity of SMAD2/SMAD3:SMAD4 heterotrimer	1/5	33/8846	0.018518	0.0602363	0.0156403	Ubb	1	3dpi	NonN_4
R-MMU-5357905	Regulation of TNFR1 signaling	1/5	33/8846	0.018518	0.0602363	0.0156403	Ubb	1	3dpi	NonN_4
R-MMU-5696394	DNA Damage Recognition in GG-NER	1/5	33/8846	0.018518	0.0602363	0.0156403	Ubb	1	3dpi	NonN_4
R-MMU-6783310	Fanconi Anemia Pathway	1/5	33/8846	0.018518	0.0602363	0.0156403	Ubb	1	3dpi	NonN_4
R-MMU-6804757	Regulation of TP53 Degradation	1/5	34/8846	0.0190748	0.0602363	0.0156403	Ubb	1	3dpi	NonN_4
R-MMU-6806003	Regulation of TP53 Expression and Degradation	1/5	34/8846	0.0190748	0.0602363	0.0156403	Ubb	1	3dpi	NonN_4
R-MMU-70263	Gluconeogenesis	1/5	34/8846	0.0190748	0.0602363	0.0156403	Aldoa	1	3dpi	NonN_4
R-MMU-5689901	Metalloprotease DUBs	1/5	35/8846	0.0196314	0.0613482	0.015929	Ubb	1	3dpi	NonN_4
R-MMU-110313	Translesion synthesis by Y family DNA polymerases bypasses lesions on DNA template	1/5	36/8846	0.0201878	0.0617993	0.0160461	Ubb	1	3dpi	NonN_4
R-MMU-5696400	Dual Incision in GG-NER	1/5	36/8846	0.0201878	0.0617993	0.0160461	Ubb	1	3dpi	NonN_4
R-MMU-5654741	Signaling by FGFR3	1/5	37/8846	0.0207438	0.0621355	0.0161334	Ubb	1	3dpi	NonN_4
R-MMU-109606	Intrinsic Pathway for Apoptosis	1/5	38/8846	0.0212997	0.0621355	0.0161334	Dynll1	1	3dpi	NonN_4
R-MMU-157118	Signaling by NOTCH	1/5	39/8846	0.0218552	0.0621355	0.0161334	Ubb	1	3dpi	NonN_4
R-MMU-5654743	Signaling by FGFR4	1/5	39/8846	0.0218552	0.0621355	0.0161334	Ubb	1	3dpi	NonN_4
R-MMU-5696395	Formation of Incision Complex in GG-NER	1/5	39/8846	0.0218552	0.0621355	0.0161334	Ubb	1	3dpi	NonN_4
R-MMU-512988	Interleukin-3, Interleukin-5 and GM-CSF signaling	1/5	40/8846	0.0224106	0.0621355	0.0161334	Ubb	1	3dpi	NonN_4
R-MMU-5675221	Negative regulation of MAPK pathway	1/5	40/8846	0.0224106	0.0621355	0.0161334	Ubb	1	3dpi	NonN_4
R-MMU-69231	Cyclin D associated events in G1	1/5	41/8846	0.0229656	0.0621355	0.0161334	Ubb	1	3dpi	NonN_4
R-MMU-69236	G1 Phase	1/5	41/8846	0.0229656	0.0621355	0.0161334	Ubb	1	3dpi	NonN_4
R-MMU-1227986	Signaling by ERBB2	1/5	42/8846	0.0235205	0.0621355	0.0161334	Ubb	1	3dpi	NonN_4
R-MMU-75893	TNF signaling	1/5	42/8846	0.0235205	0.0621355	0.0161334	Ubb	1	3dpi	NonN_4
R-MMU-8848021	Signaling by PTK6	1/5	43/8846	0.024075	0.0621355	0.0161334	Ubb	1	3dpi	NonN_4
R-MMU-9006927	Signaling by Non-Receptor Tyrosine Kinases	1/5	43/8846	0.024075	0.0621355	0.0161334	Ubb	1	3dpi	NonN_4
R-MMU-177929	Signaling by EGFR	1/5	45/8846	0.0251834	0.0621355	0.0161334	Ubb	1	3dpi	NonN_4
R-MMU-73893	DNA Damage Bypass	1/5	45/8846	0.0251834	0.0621355	0.0161334	Ubb	1	3dpi	NonN_4
R-MMU-168643	Nucleotide-binding domain, leucine rich repeat containing receptor (NLR) signaling pathways	1/5	46/8846	0.0257372	0.0621355	0.0161334	Ubb	1	3dpi	NonN_4
R-MMU-5654736	Signaling by FGFR1	1/5	46/8846	0.0257372	0.0621355	0.0161334	Ubb	1	3dpi	NonN_4
R-MMU-5218859	Regulated Necrosis	1/5	47/8846	0.0262908	0.0621355	0.0161334	Ubb	1	3dpi	NonN_4
R-MMU-6811436	COPI-independent Golgi-to-ER retrograde traffic	1/5	48/8846	0.0268441	0.0621355	0.0161334	Dynll1	1	3dpi	NonN_4
R-MMU-8866654	E3 ubiquitin ligases ubiquitinate target proteins	1/5	48/8846	0.0268441	0.0621355	0.0161334	Ubb	1	3dpi	NonN_4
R-MMU-3371497	HSP90 chaperone cycle for steroid hormone receptors (SHR) in the presence of ligand	1/5	50/8846	0.0279499	0.0621355	0.0161334	Dynll1	1	3dpi	NonN_4
R-MMU-6781823	Formation of TC-NER Pre-Incision Complex	1/5	50/8846	0.0279499	0.0621355	0.0161334	Ubb	1	3dpi	NonN_4
R-MMU-75815	Ubiquitin-dependent degradation of Cyclin D	1/5	50/8846	0.0279499	0.0621355	0.0161334	Ubb	1	3dpi	NonN_4
R-MMU-69278	Cell Cycle, Mitotic	2/5	496/8846	0.0280181	0.0621355	0.0161334	Ubb/Dynll1	2	3dpi	NonN_4
R-MMU-349425	Autodegradation of the E3 ubiquitin ligase COP1	1/5	51/8846	0.0285025	0.0621355	0.0161334	Ubb	1	3dpi	NonN_4
R-MMU-448424	Interleukin-17 signaling	1/5	51/8846	0.0285025	0.0621355	0.0161334	Ubb	1	3dpi	NonN_4
R-MMU-450294	MAP kinase activation	1/5	51/8846	0.0285025	0.0621355	0.0161334	Ubb	1	3dpi	NonN_4
R-MMU-69601	Ubiquitin Mediated Degradation of Phosphorylated Cdc25A	1/5	51/8846	0.0285025	0.0621355	0.0161334	Ubb	1	3dpi	NonN_4
R-MMU-69610	p53-Independent DNA Damage Response	1/5	51/8846	0.0285025	0.0621355	0.0161334	Ubb	1	3dpi	NonN_4
R-MMU-69613	p53-Independent G1/S DNA damage checkpoint	1/5	51/8846	0.0285025	0.0621355	0.0161334	Ubb	1	3dpi	NonN_4
R-MMU-8939902	Regulation of RUNX2 expression and activity	1/5	51/8846	0.0285025	0.0621355	0.0161334	Ubb	1	3dpi	NonN_4
R-MMU-8932339	ROS sensing by NFE2L2	1/5	52/8846	0.0290548	0.0621355	0.0161334	Ubb	1	3dpi	NonN_4
R-MMU-8941858	Regulation of RUNX3 expression and activity	1/5	52/8846	0.0290548	0.0621355	0.0161334	Ubb	1	3dpi	NonN_4
R-MMU-170834	Signaling by TGF-beta Receptor Complex	1/5	53/8846	0.0296068	0.0621355	0.0161334	Ubb	1	3dpi	NonN_4
R-MMU-450408	AUF1 (hnRNP D0) binds and destabilizes mRNA	1/5	53/8846	0.0296068	0.0621355	0.0161334	Ubb	1	3dpi	NonN_4
R-MMU-8854050	FBXL7 down-regulates AURKA during mitotic entry and in early mitosis	1/5	53/8846	0.0296068	0.0621355	0.0161334	Ubb	1	3dpi	NonN_4
R-MMU-4641257	Degradation of AXIN	1/5	54/8846	0.0301586	0.0621355	0.0161334	Ubb	1	3dpi	NonN_4
R-MMU-5610780	Degradation of GLI1 by the proteasome	1/5	55/8846	0.0307102	0.0621355	0.0161334	Ubb	1	3dpi	NonN_4
R-MMU-5620924	Intraflagellar transport	1/5	55/8846	0.0307102	0.0621355	0.0161334	Dynll1	1	3dpi	NonN_4
R-MMU-69541	Stabilization of p53	1/5	55/8846	0.0307102	0.0621355	0.0161334	Ubb	1	3dpi	NonN_4
R-MMU-917937	Iron uptake and transport	1/5	55/8846	0.0307102	0.0621355	0.0161334	Ubb	1	3dpi	NonN_4
R-MMU-4641258	Degradation of DVL	1/5	56/8846	0.0312615	0.0621355	0.0161334	Ubb	1	3dpi	NonN_4
R-MMU-5607761	Dectin-1 mediated noncanonical NF-kB signaling	1/5	56/8846	0.0312615	0.0621355	0.0161334	Ubb	1	3dpi	NonN_4
R-MMU-5610785	GLI3 is processed to GLI3R by the proteasome	1/5	56/8846	0.0312615	0.0621355	0.0161334	Ubb	1	3dpi	NonN_4
R-MMU-5676590	NIK-->noncanonical NF-kB signaling	1/5	56/8846	0.0312615	0.0621355	0.0161334	Ubb	1	3dpi	NonN_4
R-MMU-5685942	HDR through Homologous Recombination (HRR)	1/5	57/8846	0.0318125	0.0621355	0.0161334	Ubb	1	3dpi	NonN_4
R-MMU-68827	CDT1 association with the CDC6:ORC:origin complex	1/5	57/8846	0.0318125	0.0621355	0.0161334	Ubb	1	3dpi	NonN_4
R-MMU-187577	SCF(Skp2)-mediated degradation of p27/p21	1/5	59/8846	0.0329139	0.0621355	0.0161334	Ubb	1	3dpi	NonN_4
R-MMU-6782210	Gap-filling DNA repair synthesis and ligation in TC-NER	1/5	59/8846	0.0329139	0.0621355	0.0161334	Ubb	1	3dpi	NonN_4
R-MMU-6782135	Dual incision in TC-NER	1/5	60/8846	0.0334642	0.0621355	0.0161334	Ubb	1	3dpi	NonN_4
R-MMU-9707587	Regulation of HMOX1 expression and activity	1/5	60/8846	0.0334642	0.0621355	0.0161334	Ubb	1	3dpi	NonN_4
R-MMU-4608870	Asymmetric localization of PCP proteins	1/5	61/8846	0.0340142	0.0621355	0.0161334	Ubb	1	3dpi	NonN_4
R-MMU-5358346	Hedgehog ligand biogenesis	1/5	61/8846	0.0340142	0.0621355	0.0161334	Ubb	1	3dpi	NonN_4
R-MMU-70171	Glycolysis	1/5	61/8846	0.0340142	0.0621355	0.0161334	Aldoa	1	3dpi	NonN_4
R-MMU-1169091	Activation of NF-kappaB in B cells	1/5	62/8846	0.034564	0.0621355	0.0161334	Ubb	1	3dpi	NonN_4
R-MMU-8878166	Transcriptional regulation by RUNX2	1/5	62/8846	0.034564	0.0621355	0.0161334	Ubb	1	3dpi	NonN_4
R-MMU-168164	Toll Like Receptor 3 (TLR3) Cascade	1/5	63/8846	0.0351135	0.0621355	0.0161334	Ubb	1	3dpi	NonN_4
R-MMU-174084	Autodegradation of Cdh1 by Cdh1:APC/C	1/5	63/8846	0.0351135	0.0621355	0.0161334	Ubb	1	3dpi	NonN_4
R-MMU-5693565	Recruitment and ATM-mediated phosphorylation of repair and signaling proteins at DNA double strand breaks	1/5	63/8846	0.0351135	0.0621355	0.0161334	Ubb	1	3dpi	NonN_4
R-MMU-69563	p53-Dependent G1 DNA Damage Response	1/5	63/8846	0.0351135	0.0621355	0.0161334	Ubb	1	3dpi	NonN_4
R-MMU-69580	p53-Dependent G1/S DNA damage checkpoint	1/5	63/8846	0.0351135	0.0621355	0.0161334	Ubb	1	3dpi	NonN_4
R-MMU-9033241	Peroxisomal protein import	1/5	63/8846	0.0351135	0.0621355	0.0161334	Ubb	1	3dpi	NonN_4
R-MMU-5693606	DNA Double Strand Break Response	1/5	64/8846	0.0356628	0.0621355	0.0161334	Ubb	1	3dpi	NonN_4
R-MMU-1234176	Oxygen-dependent proline hydroxylation of Hypoxia-inducible Factor Alpha	1/5	65/8846	0.0362119	0.0621355	0.0161334	Ubb	1	3dpi	NonN_4
R-MMU-168142	Toll Like Receptor 10 (TLR10) Cascade	1/5	65/8846	0.0362119	0.0621355	0.0161334	Ubb	1	3dpi	NonN_4
R-MMU-168176	Toll Like Receptor 5 (TLR5) Cascade	1/5	65/8846	0.0362119	0.0621355	0.0161334	Ubb	1	3dpi	NonN_4
R-MMU-204998	Cell death signalling via NRAGE, NRIF and NADE	1/5	65/8846	0.0362119	0.0621355	0.0161334	Ubb	1	3dpi	NonN_4
R-MMU-69615	G1/S DNA Damage Checkpoints	1/5	65/8846	0.0362119	0.0621355	0.0161334	Ubb	1	3dpi	NonN_4
R-MMU-8939236	RUNX1 regulates transcription of genes involved in differentiation of HSCs	1/5	65/8846	0.0362119	0.0621355	0.0161334	Ubb	1	3dpi	NonN_4
R-MMU-975871	MyD88 cascade initiated on plasma membrane	1/5	65/8846	0.0362119	0.0621355	0.0161334	Ubb	1	3dpi	NonN_4
R-MMU-166058	MyD88:MAL(TIRAP) cascade initiated on plasma membrane	1/5	66/8846	0.0367607	0.0621355	0.0161334	Ubb	1	3dpi	NonN_4
R-MMU-168179	Toll Like Receptor TLR1:TLR2 Cascade	1/5	66/8846	0.0367607	0.0621355	0.0161334	Ubb	1	3dpi	NonN_4
R-MMU-168188	Toll Like Receptor TLR6:TLR2 Cascade	1/5	66/8846	0.0367607	0.0621355	0.0161334	Ubb	1	3dpi	NonN_4
R-MMU-181438	Toll Like Receptor 2 (TLR2) Cascade	1/5	66/8846	0.0367607	0.0621355	0.0161334	Ubb	1	3dpi	NonN_4
R-MMU-5658442	Regulation of RAS by GAPs	1/5	66/8846	0.0367607	0.0621355	0.0161334	Ubb	1	3dpi	NonN_4
R-MMU-68867	Assembly of the pre-replicative complex	1/5	66/8846	0.0367607	0.0621355	0.0161334	Ubb	1	3dpi	NonN_4
R-MMU-174154	APC/C:Cdc20 mediated degradation of Securin	1/5	67/8846	0.0373092	0.0621355	0.0161334	Ubb	1	3dpi	NonN_4
R-MMU-5654738	Signaling by FGFR2	1/5	67/8846	0.0373092	0.0621355	0.0161334	Ubb	1	3dpi	NonN_4
R-MMU-8948751	Regulation of PTEN stability and activity	1/5	67/8846	0.0373092	0.0621355	0.0161334	Ubb	1	3dpi	NonN_4
R-MMU-380259	Loss of Nlp from mitotic centrosomes	1/5	68/8846	0.0378575	0.0621355	0.0161334	Dynll1	1	3dpi	NonN_4
R-MMU-380284	Loss of proteins required for interphase microtubule organization from the centrosome	1/5	68/8846	0.0378575	0.0621355	0.0161334	Dynll1	1	3dpi	NonN_4
R-MMU-8852135	Protein ubiquitination	1/5	68/8846	0.0378575	0.0621355	0.0161334	Ubb	1	3dpi	NonN_4
R-MMU-1234174	Cellular response to hypoxia	1/5	69/8846	0.0384055	0.0621355	0.0161334	Ubb	1	3dpi	NonN_4
R-MMU-68949	Orc1 removal from chromatin	1/5	69/8846	0.0384055	0.0621355	0.0161334	Ubb	1	3dpi	NonN_4
R-MMU-69202	Cyclin E associated events during G1/S transition	1/5	69/8846	0.0384055	0.0621355	0.0161334	Ubb	1	3dpi	NonN_4
R-MMU-975138	TRAF6 mediated induction of NFkB and MAP kinases upon TLR7/8 or 9 activation	1/5	69/8846	0.0384055	0.0621355	0.0161334	Ubb	1	3dpi	NonN_4
R-MMU-6781827	Transcription-Coupled Nucleotide Excision Repair (TC-NER)	1/5	70/8846	0.0389533	0.0621355	0.0161334	Ubb	1	3dpi	NonN_4
R-MMU-975155	MyD88 dependent cascade initiated on endosome	1/5	70/8846	0.0389533	0.0621355	0.0161334	Ubb	1	3dpi	NonN_4
R-MMU-168181	Toll Like Receptor 7/8 (TLR7/8) Cascade	1/5	71/8846	0.0395009	0.0621355	0.0161334	Ubb	1	3dpi	NonN_4
R-MMU-69656	Cyclin A:Cdk2-associated events at S phase entry	1/5	71/8846	0.0395009	0.0621355	0.0161334	Ubb	1	3dpi	NonN_4
R-MMU-8854518	AURKA Activation by TPX2	1/5	71/8846	0.0395009	0.0621355	0.0161334	Dynll1	1	3dpi	NonN_4
R-MMU-174184	Cdc20:Phospho-APC/C mediated degradation of Cyclin A	1/5	72/8846	0.0400482	0.0621355	0.0161334	Ubb	1	3dpi	NonN_4
R-MMU-5687128	MAPK6/MAPK4 signaling	1/5	72/8846	0.0400482	0.0621355	0.0161334	Ubb	1	3dpi	NonN_4
R-MMU-69017	CDK-mediated phosphorylation and removal of Cdc6	1/5	72/8846	0.0400482	0.0621355	0.0161334	Ubb	1	3dpi	NonN_4
R-MMU-174178	APC/C:Cdh1 mediated degradation of Cdc20 and other APC/C:Cdh1 targeted proteins in late mitosis/early G1	1/5	73/8846	0.0405952	0.0621355	0.0161334	Ubb	1	3dpi	NonN_4
R-MMU-179419	APC:Cdc20 mediated degradation of cell cycle proteins prior to satisfation of the cell cycle checkpoint	1/5	73/8846	0.0405952	0.0621355	0.0161334	Ubb	1	3dpi	NonN_4
R-MMU-5696399	Global Genome Nucleotide Excision Repair (GG-NER)	1/5	73/8846	0.0405952	0.0621355	0.0161334	Ubb	1	3dpi	NonN_4
R-MMU-6806834	Signaling by MET	1/5	73/8846	0.0405952	0.0621355	0.0161334	Ubb	1	3dpi	NonN_4
R-MMU-1168372	Downstream signaling events of B Cell Receptor (BCR)	1/5	74/8846	0.041142	0.0622217	0.0161558	Ubb	1	3dpi	NonN_4
R-MMU-8852276	The role of GTSE1 in G2/M progression after G2 checkpoint	1/5	74/8846	0.041142	0.0622217	0.0161558	Ubb	1	3dpi	NonN_4
R-MMU-168138	Toll Like Receptor 9 (TLR9) Cascade	1/5	75/8846	0.0416885	0.0622217	0.0161558	Ubb	1	3dpi	NonN_4
R-MMU-176409	APC/C:Cdc20 mediated degradation of mitotic proteins	1/5	75/8846	0.0416885	0.0622217	0.0161558	Ubb	1	3dpi	NonN_4
R-MMU-2871837	FCERI mediated NF-kB activation	1/5	75/8846	0.0416885	0.0622217	0.0161558	Ubb	1	3dpi	NonN_4
R-MMU-176814	Activation of APC/C and APC/C:Cdc20 mediated degradation of mitotic proteins	1/5	76/8846	0.0422348	0.0623023	0.0161767	Ubb	1	3dpi	NonN_4
R-MMU-195253	Degradation of beta-catenin by the destruction complex	1/5	76/8846	0.0422348	0.0623023	0.0161767	Ubb	1	3dpi	NonN_4
R-MMU-380270	Recruitment of mitotic centrosome proteins and complexes	1/5	77/8846	0.0427809	0.0623023	0.0161767	Dynll1	1	3dpi	NonN_4
R-MMU-380287	Centrosome maturation	1/5	77/8846	0.0427809	0.0623023	0.0161767	Dynll1	1	3dpi	NonN_4
R-MMU-8878159	Transcriptional regulation by RUNX3	1/5	77/8846	0.0427809	0.0623023	0.0161767	Ubb	1	3dpi	NonN_4
R-MMU-190236	Signaling by FGFR	1/5	79/8846	0.0438722	0.062855	0.0163202	Ubb	1	3dpi	NonN_4
R-MMU-6804756	Regulation of TP53 Activity through Phosphorylation	1/5	79/8846	0.0438722	0.062855	0.0163202	Ubb	1	3dpi	NonN_4
R-MMU-9006936	Signaling by TGFB family members	1/5	79/8846	0.0438722	0.062855	0.0163202	Ubb	1	3dpi	NonN_4
R-MMU-193704	p75 NTR receptor-mediated signalling	1/5	80/8846	0.0444175	0.062855	0.0163202	Ubb	1	3dpi	NonN_4
R-MMU-5632684	Hedgehog 'on' state	1/5	80/8846	0.0444175	0.062855	0.0163202	Ubb	1	3dpi	NonN_4
R-MMU-70326	Glucose metabolism	1/5	80/8846	0.0444175	0.062855	0.0163202	Aldoa	1	3dpi	NonN_4
R-MMU-69002	DNA Replication Pre-Initiation	1/5	81/8846	0.0449626	0.0632047	0.016411	Ubb	1	3dpi	NonN_4
R-MMU-166166	MyD88-independent TLR4 cascade	1/5	82/8846	0.0455074	0.0632047	0.016411	Ubb	1	3dpi	NonN_4
R-MMU-450531	Regulation of mRNA stability by proteins that bind AU-rich elements	1/5	82/8846	0.0455074	0.0632047	0.016411	Ubb	1	3dpi	NonN_4
R-MMU-937061	TRIF(TICAM1)-mediated TLR4 signaling	1/5	82/8846	0.0455074	0.0632047	0.016411	Ubb	1	3dpi	NonN_4
R-MMU-174143	APC/C-mediated degradation of cell cycle proteins	1/5	84/8846	0.0465962	0.0638305	0.0165735	Ubb	1	3dpi	NonN_4
R-MMU-202424	Downstream TCR signaling	1/5	84/8846	0.0465962	0.0638305	0.0165735	Ubb	1	3dpi	NonN_4
R-MMU-453276	Regulation of mitotic cell cycle	1/5	84/8846	0.0465962	0.0638305	0.0165735	Ubb	1	3dpi	NonN_4
R-MMU-4086400	PCP/CE pathway	1/5	86/8846	0.0476841	0.0650238	0.0168834	Ubb	1	3dpi	NonN_4
R-MMU-380320	Recruitment of NuMA to mitotic centrosomes	1/5	88/8846	0.048771	0.0661817	0.017184	Dynll1	1	3dpi	NonN_4
R-MMU-5607764	CLEC7A (Dectin-1) signaling	1/5	89/8846	0.049314	0.0661817	0.017184	Ubb	1	3dpi	NonN_4
R-MMU-69052	Switching of origins to a post-replicative state	1/5	89/8846	0.049314	0.0661817	0.017184	Ubb	1	3dpi	NonN_4
R-MMU-141424	Amplification of signal from the kinetochores	1/5	90/8846	0.0498569	0.0661817	0.017184	Dynll1	1	3dpi	NonN_4
R-MMU-141444	Amplification of signal from unattached kinetochores via a MAD2 inhibitory signal	1/5	90/8846	0.0498569	0.0661817	0.017184	Dynll1	1	3dpi	NonN_4
R-MMU-6807878	COPI-mediated anterograde transport	1/5	90/8846	0.0498569	0.0661817	0.017184	Dynll1	1	3dpi	NonN_4
R-MMU-5689603	UCH proteinases	1/5	93/8846	0.0514838	0.0680403	0.0176666	Ubb	1	3dpi	NonN_4
R-MMU-9020702	Interleukin-1 signaling	1/5	94/8846	0.0520256	0.0682691	0.017726	Ubb	1	3dpi	NonN_4
R-MMU-2559582	Senescence-Associated Secretory Phenotype (SASP)	1/5	95/8846	0.0525672	0.0682691	0.017726	Ubb	1	3dpi	NonN_4
R-MMU-5620912	Anchoring of the basal body to the plasma membrane	1/5	95/8846	0.0525672	0.0682691	0.017726	Dynll1	1	3dpi	NonN_4
R-MMU-5668541	TNFR2 non-canonical NF-kB pathway	1/5	95/8846	0.0525672	0.0682691	0.017726	Ubb	1	3dpi	NonN_4
R-MMU-8856825	Cargo recognition for clathrin-mediated endocytosis	1/5	96/8846	0.0531085	0.0686748	0.0178314	Ubb	1	3dpi	NonN_4
R-MMU-166016	Toll Like Receptor 4 (TLR4) Cascade	1/5	97/8846	0.0536496	0.0687816	0.0178591	Ubb	1	3dpi	NonN_4
R-MMU-2672351	Stimuli-sensing channels	1/5	97/8846	0.0536496	0.0687816	0.0178591	Ubb	1	3dpi	NonN_4
R-MMU-983705	Signaling by the B Cell Receptor (BCR)	1/5	98/8846	0.0541904	0.0691793	0.0179623	Ubb	1	3dpi	NonN_4
R-MMU-382556	ABC-family proteins mediated transport	1/5	99/8846	0.054731	0.0692798	0.0179884	Ubb	1	3dpi	NonN_4
R-MMU-5696398	Nucleotide Excision Repair	1/5	99/8846	0.054731	0.0692798	0.0179884	Ubb	1	3dpi	NonN_4
R-MMU-109581	Apoptosis	1/5	100/8846	0.0552714	0.0696698	0.0180897	Dynll1	1	3dpi	NonN_4
R-MMU-202403	TCR signaling	1/5	102/8846	0.0563513	0.0701469	0.0182136	Ubb	1	3dpi	NonN_4
R-MMU-69206	G1/S Transition	1/5	102/8846	0.0563513	0.0701469	0.0182136	Ubb	1	3dpi	NonN_4
R-MMU-9609507	Protein localization	1/5	102/8846	0.0563513	0.0701469	0.0182136	Ubb	1	3dpi	NonN_4
R-MMU-2132295	MHC class II antigen presentation	1/5	105/8846	0.0579694	0.0714276	0.0185461	Dynll1	1	3dpi	NonN_4
R-MMU-5610787	Hedgehog 'off' state	1/5	105/8846	0.0579694	0.0714276	0.0185461	Ubb	1	3dpi	NonN_4
R-MMU-9648025	EML4 and NUDC in mitotic spindle formation	1/5	106/8846	0.0585082	0.0714276	0.0185461	Dynll1	1	3dpi	NonN_4
R-MMU-2559580	Oxidative Stress Induced Senescence	1/5	107/8846	0.0590468	0.0714276	0.0185461	Ubb	1	3dpi	NonN_4
R-MMU-446652	Interleukin-1 family signaling	1/5	107/8846	0.0590468	0.0714276	0.0185461	Ubb	1	3dpi	NonN_4
R-MMU-5621481	C-type lectin receptors (CLRs)	1/5	107/8846	0.0590468	0.0714276	0.0185461	Ubb	1	3dpi	NonN_4
R-MMU-69618	Mitotic Spindle Checkpoint	1/5	107/8846	0.0590468	0.0714276	0.0185461	Dynll1	1	3dpi	NonN_4
R-MMU-6807070	PTEN Regulation	1/5	109/8846	0.0601233	0.0724377	0.0188084	Ubb	1	3dpi	NonN_4
R-MMU-5693567	HDR through Homologous Recombination (HRR) or Single Strand Annealing (SSA)	1/5	111/8846	0.0611988	0.0734386	0.0190683	Ubb	1	3dpi	NonN_4
R-MMU-5693538	Homology Directed Repair	1/5	114/8846	0.0628102	0.0747741	0.019415	Ubb	1	3dpi	NonN_4
R-MMU-69239	Synthesis of DNA	1/5	114/8846	0.0628102	0.0747741	0.019415	Ubb	1	3dpi	NonN_4
R-MMU-114608	Platelet degranulation	1/5	115/8846	0.0633469	0.0751148	0.0195035	Aldoa	1	3dpi	NonN_4
R-MMU-2454202	Fc epsilon receptor (FCERI) signaling	1/5	116/8846	0.0638832	0.0754527	0.0195912	Ubb	1	3dpi	NonN_4
R-MMU-2500257	Resolution of Sister Chromatid Cohesion	1/5	117/8846	0.0644194	0.0757875	0.0196782	Dynll1	1	3dpi	NonN_4
R-MMU-76005	Response to elevated platelet cytosolic Ca2+	1/5	120/8846	0.0660264	0.0773747	0.0200903	Aldoa	1	3dpi	NonN_4
R-MMU-3858494	Beta-catenin independent WNT signaling	1/5	121/8846	0.0665615	0.0773971	0.0200961	Ubb	1	3dpi	NonN_4
R-MMU-73887	Death Receptor Signalling	1/5	121/8846	0.0665615	0.0773971	0.0200961	Ubb	1	3dpi	NonN_4
R-MMU-69306	DNA Replication	1/5	122/8846	0.0670965	0.0777179	0.0201794	Ubb	1	3dpi	NonN_4
R-MMU-8856688	Golgi-to-ER retrograde transport	1/5	124/8846	0.0681656	0.0786526	0.0204221	Dynll1	1	3dpi	NonN_4
R-MMU-168898	Toll-like Receptor Cascades	1/5	126/8846	0.0692337	0.0792752	0.0205837	Ubb	1	3dpi	NonN_4
R-MMU-453279	Mitotic G1 phase and G1/S transition	1/5	126/8846	0.0692337	0.0792752	0.0205837	Ubb	1	3dpi	NonN_4
R-MMU-5663220	RHO GTPases Activate Formins	1/5	131/8846	0.0718997	0.0820149	0.0212951	Dynll1	1	3dpi	NonN_4
R-MMU-8856828	Clathrin-mediated endocytosis	1/5	134/8846	0.0734964	0.0835187	0.0216855	Ubb	1	3dpi	NonN_4
R-MMU-5358351	Signaling by Hedgehog	1/5	136/8846	0.0745596	0.0844072	0.0219162	Ubb	1	3dpi	NonN_4
R-MMU-5693532	DNA Double-Strand Break Repair	1/5	140/8846	0.0766832	0.0864848	0.0224557	Ubb	1	3dpi	NonN_4
R-MMU-69242	S Phase	1/5	141/8846	0.0772135	0.0867567	0.0225263	Ubb	1	3dpi	NonN_4
R-MMU-199977	ER to Golgi Anterograde Transport	1/5	142/8846	0.0777435	0.0870263	0.0225963	Dynll1	1	3dpi	NonN_4
R-MMU-5633007	Regulation of TP53 Activity	1/5	143/8846	0.0782733	0.0872936	0.0226657	Ubb	1	3dpi	NonN_4
R-MMU-201681	TCF dependent signaling in response to WNT	1/5	150/8846	0.081975	0.0910833	0.0236497	Ubb	1	3dpi	NonN_4
R-MMU-69481	G2/M Checkpoints	1/5	152/8846	0.0830304	0.0919156	0.0238658	Ubb	1	3dpi	NonN_4
R-MMU-2559583	Cellular Senescence	1/5	162/8846	0.0882931	0.0973821	0.0252852	Ubb	1	3dpi	NonN_4
R-MMU-948021	Transport to the Golgi and subsequent modification	1/5	170/8846	0.0924858	0.101262	0.0262926	Dynll1	1	3dpi	NonN_4
R-MMU-983712	Ion channel transport	1/5	170/8846	0.0924858	0.101262	0.0262926	Ubb	1	3dpi	NonN_4
R-MMU-6811442	Intra-Golgi and retrograde Golgi-to-ER traffic	1/5	177/8846	0.0961418	0.104882	0.0272325	Dynll1	1	3dpi	NonN_4
R-MMU-5689880	Ub-specific processing proteases	1/5	179/8846	0.0971842	0.105635	0.027428	Ubb	1	3dpi	NonN_4
R-MMU-68877	Mitotic Prometaphase	1/5	188/8846	0.101863	0.109924	0.0285417	Dynll1	1	3dpi	NonN_4
R-MMU-8878171	Transcriptional regulation by RUNX1	1/5	188/8846	0.101863	0.109924	0.0285417	Ubb	1	3dpi	NonN_4
R-MMU-5617833	Cilium Assembly	1/5	194/8846	0.104971	0.112873	0.0293073	Dynll1	1	3dpi	NonN_4
R-MMU-8951664	Neddylation	1/5	216/8846	0.116296	0.124602	0.0323529	Ubb	1	3dpi	NonN_4
R-MMU-1852241	Organelle biogenesis and maintenance	1/5	222/8846	0.119364	0.127435	0.0330884	Dynll1	1	3dpi	NonN_4
R-MMU-1257604	PIP3 activates AKT signaling	1/5	223/8846	0.119875	0.127526	0.0331121	Ubb	1	3dpi	NonN_4
R-MMU-195721	Signaling by WNT	1/5	227/8846	0.121915	0.129238	0.0335565	Ubb	1	3dpi	NonN_4
R-MMU-5688426	Deubiquitination	1/5	241/8846	0.129024	0.135815	0.0352643	Ubb	1	3dpi	NonN_4
R-MMU-76002	Platelet activation, signaling and aggregation	1/5	241/8846	0.129024	0.135815	0.0352643	Aldoa	1	3dpi	NonN_4
R-MMU-9006925	Intracellular signaling by second messengers	1/5	249/8846	0.133067	0.13958	0.0362419	Ubb	1	3dpi	NonN_4
R-MMU-449147	Signaling by Interleukins	1/5	254/8846	0.135585	0.141727	0.0367992	Ubb	1	3dpi	NonN_4
R-MMU-422475	Axon guidance	1/5	256/8846	0.136591	0.142282	0.0369435	Ubb	1	3dpi	NonN_4
R-MMU-9675108	Nervous system development	1/5	257/8846	0.137094	0.142312	0.0369511	Ubb	1	3dpi	NonN_4
R-MMU-5673001	RAF/MAP kinase cascade	1/5	259/8846	0.138098	0.14286	0.0370935	Ubb	1	3dpi	NonN_4
R-MMU-71387	Metabolism of carbohydrates	1/5	262/8846	0.139603	0.143921	0.0373689	Aldoa	1	3dpi	NonN_4
R-MMU-5684996	MAPK1/MAPK3 signaling	1/5	265/8846	0.141106	0.144972	0.0376418	Ubb	1	3dpi	NonN_4
R-MMU-983168	Antigen processing: Ubiquitination & Proteasome degradation	1/5	283/8846	0.150079	0.153664	0.0398987	Ubb	1	3dpi	NonN_4
R-MMU-5683057	MAPK family signaling cascades	1/5	288/8846	0.152558	0.155671	0.0404198	Ubb	1	3dpi	NonN_4
R-MMU-73894	DNA Repair	1/5	298/8846	0.157498	0.160168	0.0415874	Ubb	1	3dpi	NonN_4
R-MMU-195258	RHO GTPase Effectors	1/5	304/8846	0.160452	0.16262	0.0422241	Dynll1	1	3dpi	NonN_4
R-MMU-983169	Class I MHC mediated antigen processing & presentation	1/5	342/8846	0.178965	0.180772	0.0469374	Ubb	1	3dpi	NonN_4
R-MMU-1280215	Cytokine Signaling in Immune system	1/5	381/8846	0.197624	0.19895	0.0516572	Ubb	1	3dpi	NonN_4
R-MMU-9006934	Signaling by Receptor Tyrosine Kinases	1/5	406/8846	0.209405	0.210106	0.0545537	Ubb	1	3dpi	NonN_4
R-MMU-1266738	Developmental Biology	1/5	454/8846	0.231638	0.231638	0.0601445	Ubb	1	3dpi	NonN_4
R-MMU-1799339	SRP-dependent cotranslational protein targeting to membrane	21/56	88/8846	7.13749e-29	2.82956e-26	1.07556e-26	Rpl24/Rps24/Rpl13/Rps8/Rplp1/Rpl19/Rpl9/Uba52/Rpl6/Rps2/Rpl11/Rpl23/Rps21/Rps10/Rps11/Rpl35a/Rpl18/Rpl38/Rpl27a/Rpl37a/Rpl37	21	3dpi	NonN_3
R-MMU-975956	Nonsense Mediated Decay (NMD) independent of the Exon Junction Complex (EJC)	21/56	90/8846	1.20921e-28	2.82956e-26	1.07556e-26	Rpl24/Rps24/Rpl13/Rps8/Rplp1/Rpl19/Rpl9/Uba52/Rpl6/Rps2/Rpl11/Rpl23/Rps21/Rps10/Rps11/Rpl35a/Rpl18/Rpl38/Rpl27a/Rpl37a/Rpl37	21	3dpi	NonN_3
R-MMU-72689	Formation of a pool of free 40S subunits	21/56	97/8846	6.91793e-28	1.0792e-25	4.10221e-26	Rpl24/Rps24/Rpl13/Rps8/Rplp1/Rpl19/Rpl9/Uba52/Rpl6/Rps2/Rpl11/Rpl23/Rps21/Rps10/Rps11/Rpl35a/Rpl18/Rpl38/Rpl27a/Rpl37a/Rpl37	21	3dpi	NonN_3
R-MMU-156827	L13a-mediated translational silencing of Ceruloplasmin expression	21/56	107/8846	6.60733e-27	7.64794e-25	2.90711e-25	Rpl24/Rps24/Rpl13/Rps8/Rplp1/Rpl19/Rpl9/Uba52/Rpl6/Rps2/Rpl11/Rpl23/Rps21/Rps10/Rps11/Rpl35a/Rpl18/Rpl38/Rpl27a/Rpl37a/Rpl37	21	3dpi	NonN_3
R-MMU-72706	GTP hydrolysis and joining of the 60S ribosomal subunit	21/56	108/8846	8.17088e-27	7.64794e-25	2.90711e-25	Rpl24/Rps24/Rpl13/Rps8/Rplp1/Rpl19/Rpl9/Uba52/Rpl6/Rps2/Rpl11/Rpl23/Rps21/Rps10/Rps11/Rpl35a/Rpl18/Rpl38/Rpl27a/Rpl37a/Rpl37	21	3dpi	NonN_3
R-MMU-927802	Nonsense-Mediated Decay (NMD)	21/56	110/8846	1.24134e-26	8.29926e-25	3.15469e-25	Rpl24/Rps24/Rpl13/Rps8/Rplp1/Rpl19/Rpl9/Uba52/Rpl6/Rps2/Rpl11/Rpl23/Rps21/Rps10/Rps11/Rpl35a/Rpl18/Rpl38/Rpl27a/Rpl37a/Rpl37	21	3dpi	NonN_3
R-MMU-975957	Nonsense Mediated Decay (NMD) enhanced by the Exon Junction Complex (EJC)	21/56	110/8846	1.24134e-26	8.29926e-25	3.15469e-25	Rpl24/Rps24/Rpl13/Rps8/Rplp1/Rpl19/Rpl9/Uba52/Rpl6/Rps2/Rpl11/Rpl23/Rps21/Rps10/Rps11/Rpl35a/Rpl18/Rpl38/Rpl27a/Rpl37a/Rpl37	21	3dpi	NonN_3
R-MMU-72613	Eukaryotic Translation Initiation	21/56	115/8846	3.40501e-26	1.77061e-24	6.73038e-25	Rpl24/Rps24/Rpl13/Rps8/Rplp1/Rpl19/Rpl9/Uba52/Rpl6/Rps2/Rpl11/Rpl23/Rps21/Rps10/Rps11/Rpl35a/Rpl18/Rpl38/Rpl27a/Rpl37a/Rpl37	21	3dpi	NonN_3
R-MMU-72737	Cap-dependent Translation Initiation	21/56	115/8846	3.40501e-26	1.77061e-24	6.73038e-25	Rpl24/Rps24/Rpl13/Rps8/Rplp1/Rpl19/Rpl9/Uba52/Rpl6/Rps2/Rpl11/Rpl23/Rps21/Rps10/Rps11/Rpl35a/Rpl18/Rpl38/Rpl27a/Rpl37a/Rpl37	21	3dpi	NonN_3
R-MMU-6791226	Major pathway of rRNA processing in the nucleolus and cytosol	21/56	171/8846	2.21745e-22	8.64806e-21	3.28727e-21	Rpl24/Rps24/Rpl13/Rps8/Rplp1/Rpl19/Rpl9/Uba52/Rpl6/Rps2/Rpl11/Rpl23/Rps21/Rps10/Rps11/Rpl35a/Rpl18/Rpl38/Rpl27a/Rpl37a/Rpl37	21	3dpi	NonN_3
R-MMU-72312	rRNA processing	21/56	171/8846	2.21745e-22	8.64806e-21	3.28727e-21	Rpl24/Rps24/Rpl13/Rps8/Rplp1/Rpl19/Rpl9/Uba52/Rpl6/Rps2/Rpl11/Rpl23/Rps21/Rps10/Rps11/Rpl35a/Rpl18/Rpl38/Rpl27a/Rpl37a/Rpl37	21	3dpi	NonN_3
R-MMU-8868773	rRNA processing in the nucleus and cytosol	21/56	171/8846	2.21745e-22	8.64806e-21	3.28727e-21	Rpl24/Rps24/Rpl13/Rps8/Rplp1/Rpl19/Rpl9/Uba52/Rpl6/Rps2/Rpl11/Rpl23/Rps21/Rps10/Rps11/Rpl35a/Rpl18/Rpl38/Rpl27a/Rpl37a/Rpl37	21	3dpi	NonN_3
R-MMU-72766	Translation	21/56	220/8846	4.89363e-20	1.76171e-18	6.69655e-19	Rpl24/Rps24/Rpl13/Rps8/Rplp1/Rpl19/Rpl9/Uba52/Rpl6/Rps2/Rpl11/Rpl23/Rps21/Rps10/Rps11/Rpl35a/Rpl18/Rpl38/Rpl27a/Rpl37a/Rpl37	21	3dpi	NonN_3
R-MMU-9646399	Aggrephagy	6/56	36/8846	8.22766e-08	2.75039e-06	1.04547e-06	Uba52/Ubb/Dynll1/Tuba1a/Rps27a/Tubb2a	6	3dpi	NonN_3
R-MMU-9707564	Cytoprotection by HMOX1	8/56	107/8846	3.0906e-07	9.64266e-06	3.66534e-06	Cox4i1/Uba52/Cox8a/Cox7c/Ubb/Cox6b1/Rps27a/Ndufa4	8	3dpi	NonN_3
R-MMU-72695	Formation of the ternary complex, and subsequently, the 43S complex	6/56	50/8846	6.27095e-07	1.83425e-05	6.97231e-06	Rps24/Rps8/Rps2/Rps21/Rps10/Rps11	6	3dpi	NonN_3
R-MMU-72649	Translation initiation complex formation	6/56	57/8846	1.38416e-06	3.59881e-05	1.36797e-05	Rps24/Rps8/Rps2/Rps21/Rps10/Rps11	6	3dpi	NonN_3
R-MMU-72702	Ribosomal scanning and start codon recognition	6/56	57/8846	1.38416e-06	3.59881e-05	1.36797e-05	Rps24/Rps8/Rps2/Rps21/Rps10/Rps11	6	3dpi	NonN_3
R-MMU-72662	Activation of the mRNA upon binding of the cap-binding complex and eIFs, and subsequent binding to 43S	6/56	58/8846	1.53639e-06	3.74679e-05	1.42422e-05	Rps24/Rps8/Rps2/Rps21/Rps10/Rps11	6	3dpi	NonN_3
R-MMU-611105	Respiratory electron transport	7/56	92/8846	1.60119e-06	3.74679e-05	1.42422e-05	Cox4i1/Ndufa13/Cox8a/Cox7c/Cox6b1/Ndufa4/Ndufc2	7	3dpi	NonN_3
R-MMU-2262752	Cellular responses to stress	14/56	499/8846	1.78148e-06	3.97016e-05	1.50913e-05	Hspa8/Cox4i1/Uba52/Cox8a/Cox7c/Elob/Ubb/Atp6v0c/Dynll1/Cox6b1/Tuba1a/Rps27a/Tubb2a/Ndufa4	14	3dpi	NonN_3
R-MMU-9711123	Cellular response to chemical stress	8/56	139/8846	2.28478e-06	4.86036e-05	1.8475e-05	Cox4i1/Uba52/Cox8a/Cox7c/Ubb/Cox6b1/Rps27a/Ndufa4	8	3dpi	NonN_3
R-MMU-9663891	Selective autophagy	6/56	63/8846	2.51722e-06	5.12199e-05	1.94696e-05	Uba52/Ubb/Dynll1/Tuba1a/Rps27a/Tubb2a	6	3dpi	NonN_3
R-MMU-9705462	Inactivation of CSF3 (G-CSF) signaling	4/56	19/8846	5.2025e-06	0.000101449	3.85624e-05	Uba52/Elob/Ubb/Rps27a	4	3dpi	NonN_3
R-MMU-163200	Respiratory electron transport, ATP synthesis by chemiosmotic coupling, and heat production by uncoupling proteins.	7/56	116/8846	7.58195e-06	0.000141934	5.39515e-05	Cox4i1/Ndufa13/Cox8a/Cox7c/Cox6b1/Ndufa4/Ndufc2	7	3dpi	NonN_3
R-MMU-1428517	The citric acid (TCA) cycle and respiratory electron transport	8/56	167/8846	8.96334e-06	0.00016134	6.13281e-05	Cox4i1/Bsg/Ndufa13/Cox8a/Cox7c/Cox6b1/Ndufa4/Ndufc2	8	3dpi	NonN_3
R-MMU-9674555	Signaling by CSF3 (G-CSF)	4/56	23/8846	1.16638e-05	0.000202172	7.68489e-05	Uba52/Elob/Ubb/Rps27a	4	3dpi	NonN_3
R-MMU-9648002	RAS processing	4/56	26/8846	1.9416e-05	0.000324525	0.000123357	Uba52/Ubb/Rps27a/Calm2	4	3dpi	NonN_3
R-MMU-445989	TAK1 activates NFkB by phosphorylation and activation of IKKs complex	4/56	27/8846	2.26857e-05	0.000366101	0.000139161	Hmgb1/Uba52/Ubb/Rps27a	4	3dpi	NonN_3
R-MMU-5689877	Josephin domain DUBs	3/56	10/8846	2.79476e-05	0.000421919	0.000160379	Uba52/Ubb/Rps27a	3	3dpi	NonN_3
R-MMU-9708530	Regulation of BACH1 activity	3/56	10/8846	2.79476e-05	0.000421919	0.000160379	Uba52/Ubb/Rps27a	3	3dpi	NonN_3
R-MMU-3134975	Regulation of innate immune responses to cytosolic DNA	3/56	11/8846	3.82555e-05	0.000542532	0.000206226	Uba52/Ubb/Rps27a	3	3dpi	NonN_3
R-MMU-5684264	MAP3K8 (TPL2)-dependent MAPK1/3 activation	3/56	11/8846	3.82555e-05	0.000542532	0.000206226	Uba52/Ubb/Rps27a	3	3dpi	NonN_3
R-MMU-168928	DDX58/IFIH1-mediated induction of interferon-alpha/beta	4/56	31/8846	3.99146e-05	0.000549413	0.000208841	Hmgb1/Uba52/Ubb/Rps27a	4	3dpi	NonN_3
R-MMU-209543	p75NTR recruits signalling complexes	3/56	12/8846	5.07784e-05	0.000617074	0.00023456	Uba52/Ubb/Rps27a	3	3dpi	NonN_3
R-MMU-209560	NF-kB is activated and signals survival	3/56	12/8846	5.07784e-05	0.000617074	0.00023456	Uba52/Ubb/Rps27a	3	3dpi	NonN_3
R-MMU-937039	IRAK1 recruits IKK complex	3/56	12/8846	5.07784e-05	0.000617074	0.00023456	Uba52/Ubb/Rps27a	3	3dpi	NonN_3
R-MMU-975144	IRAK1 recruits IKK complex upon TLR7/8 or 9 stimulation	3/56	12/8846	5.07784e-05	0.000617074	0.00023456	Uba52/Ubb/Rps27a	3	3dpi	NonN_3
R-MMU-5696394	DNA Damage Recognition in GG-NER	4/56	33/8846	5.14228e-05	0.000617074	0.00023456	Actb/Uba52/Ubb/Rps27a	4	3dpi	NonN_3
R-MMU-3700989	Transcriptional Regulation by TP53	9/56	282/8846	6.08066e-05	0.000668587	0.000254141	Cox4i1/Uba52/Cox8a/Cox7c/Elob/Ubb/Cox6b1/Rps27a/Ndufa4	9	3dpi	NonN_3
R-MMU-437239	Recycling pathway of L1	4/56	35/8846	6.51833e-05	0.000668587	0.000254141	Actb/Actg1/Tuba1a/Tubb2a	4	3dpi	NonN_3
R-MMU-205043	NRIF signals cell death from the nucleus	3/56	13/8846	6.57158e-05	0.000668587	0.000254141	Uba52/Ubb/Rps27a	3	3dpi	NonN_3
R-MMU-2173791	TGF-beta receptor signaling in EMT (epithelial to mesenchymal transition)	3/56	13/8846	6.57158e-05	0.000668587	0.000254141	Uba52/Ubb/Rps27a	3	3dpi	NonN_3
R-MMU-936440	Negative regulators of DDX58/IFIH1 signaling	3/56	13/8846	6.57158e-05	0.000668587	0.000254141	Uba52/Ubb/Rps27a	3	3dpi	NonN_3
R-MMU-9706369	Negative regulation of FLT3	3/56	13/8846	6.57158e-05	0.000668587	0.000254141	Uba52/Ubb/Rps27a	3	3dpi	NonN_3
R-MMU-975163	IRAK2 mediated activation of TAK1 complex upon TLR7/8 or 9 stimulation	3/56	13/8846	6.57158e-05	0.000668587	0.000254141	Uba52/Ubb/Rps27a	3	3dpi	NonN_3
R-MMU-5628897	TP53 Regulates Metabolic Genes	5/56	70/8846	7.49966e-05	0.000721614	0.000274298	Cox4i1/Cox8a/Cox7c/Cox6b1/Ndufa4	5	3dpi	NonN_3
R-MMU-114608	Platelet degranulation	6/56	115/8846	8.09774e-05	0.000721614	0.000274298	Actg1/Aldoa/Cd9/Cd63/Tmsb4x/Calm2	6	3dpi	NonN_3
R-MMU-110312	Translesion synthesis by REV1	3/56	14/8846	8.32631e-05	0.000721614	0.000274298	Uba52/Ubb/Rps27a	3	3dpi	NonN_3
R-MMU-2173788	Downregulation of TGF-beta receptor signaling	3/56	14/8846	8.32631e-05	0.000721614	0.000274298	Uba52/Ubb/Rps27a	3	3dpi	NonN_3
R-MMU-2559585	Oncogene Induced Senescence	3/56	14/8846	8.32631e-05	0.000721614	0.000274298	Uba52/Ubb/Rps27a	3	3dpi	NonN_3
R-MMU-532668	N-glycan trimming in the ER and Calnexin/Calreticulin cycle	3/56	14/8846	8.32631e-05	0.000721614	0.000274298	Uba52/Ubb/Rps27a	3	3dpi	NonN_3
R-MMU-5626467	RHO GTPases activate IQGAPs	3/56	14/8846	8.32631e-05	0.000721614	0.000274298	Actb/Actg1/Calm2	3	3dpi	NonN_3
R-MMU-937072	TRAF6-mediated induction of TAK1 complex within TLR4 complex	3/56	14/8846	8.32631e-05	0.000721614	0.000274298	Uba52/Ubb/Rps27a	3	3dpi	NonN_3
R-MMU-1632852	Macroautophagy	6/56	118/8846	9.34611e-05	0.00076969	0.000292572	Uba52/Ubb/Dynll1/Tuba1a/Rps27a/Tubb2a	6	3dpi	NonN_3
R-MMU-9612973	Autophagy	6/56	118/8846	9.34611e-05	0.00076969	0.000292572	Uba52/Ubb/Dynll1/Tuba1a/Rps27a/Tubb2a	6	3dpi	NonN_3
R-MMU-8852276	The role of GTSE1 in G2/M progression after G2 checkpoint	5/56	74/8846	9.79187e-05	0.00076969	0.000292572	Uba52/Ubb/Tuba1a/Rps27a/Tubb2a	5	3dpi	NonN_3
R-MMU-76005	Response to elevated platelet cytosolic Ca2+	6/56	120/8846	0.000102603	0.00076969	0.000292572	Actg1/Aldoa/Cd9/Cd63/Tmsb4x/Calm2	6	3dpi	NonN_3
R-MMU-1295596	Spry regulation of FGF signaling	3/56	15/8846	0.000103612	0.00076969	0.000292572	Uba52/Ubb/Rps27a	3	3dpi	NonN_3
R-MMU-193639	p75NTR signals via NF-kB	3/56	15/8846	0.000103612	0.00076969	0.000292572	Uba52/Ubb/Rps27a	3	3dpi	NonN_3
R-MMU-5655862	Translesion synthesis by POLK	3/56	15/8846	0.000103612	0.00076969	0.000292572	Uba52/Ubb/Rps27a	3	3dpi	NonN_3
R-MMU-5656121	Translesion synthesis by POLI	3/56	15/8846	0.000103612	0.00076969	0.000292572	Uba52/Ubb/Rps27a	3	3dpi	NonN_3
R-MMU-936964	Activation of IRF3/IRF7 mediated by TBK1/IKK epsilon	3/56	15/8846	0.000103612	0.00076969	0.000292572	Uba52/Ubb/Rps27a	3	3dpi	NonN_3
R-MMU-190828	Gap junction trafficking	4/56	40/8846	0.00011113	0.000812638	0.000308898	Actb/Actg1/Tuba1a/Tubb2a	4	3dpi	NonN_3
R-MMU-157858	Gap junction trafficking and regulation	4/56	42/8846	0.000134834	0.000970804	0.000369019	Actb/Actg1/Tuba1a/Tubb2a	4	3dpi	NonN_3
R-MMU-110320	Translesion Synthesis by POLH	3/56	17/8846	0.000153464	0.00105619	0.000401476	Uba52/Ubb/Rps27a	3	3dpi	NonN_3
R-MMU-2173795	Downregulation of SMAD2/3:SMAD4 transcriptional activity	3/56	17/8846	0.000153464	0.00105619	0.000401476	Uba52/Ubb/Rps27a	3	3dpi	NonN_3
R-MMU-6804760	Regulation of TP53 Activity through Methylation	3/56	17/8846	0.000153464	0.00105619	0.000401476	Uba52/Ubb/Rps27a	3	3dpi	NonN_3
R-MMU-2565942	Regulation of PLK1 Activity at G2/M Transition	5/56	83/8846	0.000169024	0.00114642	0.000435774	Uba52/Ubb/Dynll1/Tuba1a/Rps27a	5	3dpi	NonN_3
R-MMU-1980143	Signaling by NOTCH1	3/56	18/8846	0.000183331	0.00117533	0.000446762	Uba52/Ubb/Rps27a	3	3dpi	NonN_3
R-MMU-376176	Signaling by ROBO receptors	3/56	18/8846	0.000183331	0.00117533	0.000446762	Uba52/Ubb/Rps27a	3	3dpi	NonN_3
R-MMU-9012852	Signaling by NOTCH3	3/56	18/8846	0.000183331	0.00117533	0.000446762	Uba52/Ubb/Rps27a	3	3dpi	NonN_3
R-MMU-9013507	NOTCH3 Activation and Transmission of Signal to the Nucleus	3/56	18/8846	0.000183331	0.00117533	0.000446762	Uba52/Ubb/Rps27a	3	3dpi	NonN_3
R-MMU-8856828	Clathrin-mediated endocytosis	6/56	134/8846	0.000188378	0.00119137	0.000452858	Hspa8/Actb/Actg1/Uba52/Ubb/Rps27a	6	3dpi	NonN_3
R-MMU-5218859	Regulated Necrosis	4/56	47/8846	0.000209878	0.00128392	0.00048804	Hmgb1/Uba52/Ubb/Rps27a	4	3dpi	NonN_3
R-MMU-4641263	Regulation of FZD by ubiquitination	3/56	19/8846	0.00021673	0.00128392	0.00048804	Uba52/Ubb/Rps27a	3	3dpi	NonN_3
R-MMU-5696397	Gap-filling DNA repair synthesis and ligation in GG-NER	3/56	19/8846	0.00021673	0.00128392	0.00048804	Uba52/Ubb/Rps27a	3	3dpi	NonN_3
R-MMU-6807004	Negative regulation of MET activity	3/56	19/8846	0.00021673	0.00128392	0.00048804	Uba52/Ubb/Rps27a	3	3dpi	NonN_3
R-MMU-8876725	Protein methylation	3/56	19/8846	0.00021673	0.00128392	0.00048804	Hspa8/Rps2/Calm2	3	3dpi	NonN_3
R-MMU-450321	JNK (c-Jun kinases) phosphorylation and activation mediated by activated human TAK1	3/56	20/8846	0.000253834	0.00144871	0.000550681	Uba52/Ubb/Rps27a	3	3dpi	NonN_3
R-MMU-912631	Regulation of signaling by CBL	3/56	20/8846	0.000253834	0.00144871	0.000550681	Uba52/Ubb/Rps27a	3	3dpi	NonN_3
R-MMU-937041	IKK complex recruitment mediated by RIP1	3/56	20/8846	0.000253834	0.00144871	0.000550681	Uba52/Ubb/Rps27a	3	3dpi	NonN_3
R-MMU-3371497	HSP90 chaperone cycle for steroid hormone receptors (SHR) in the presence of ligand	4/56	50/8846	0.0002672	0.00150662	0.000572692	Hspa8/Dynll1/Tuba1a/Tubb2a	4	3dpi	NonN_3
R-MMU-2173789	TGF-beta receptor signaling activates SMADs	3/56	21/8846	0.000294814	0.00162321	0.00061701	Uba52/Ubb/Rps27a	3	3dpi	NonN_3
R-MMU-450302	activated TAK1 mediates p38 MAPK activation	3/56	21/8846	0.000294814	0.00162321	0.00061701	Uba52/Ubb/Rps27a	3	3dpi	NonN_3
R-MMU-450408	AUF1 (hnRNP D0) binds and destabilizes mRNA	4/56	53/8846	0.000334994	0.00182299	0.00069295	Hspa8/Uba52/Ubb/Rps27a	4	3dpi	NonN_3
R-MMU-2173796	SMAD2/SMAD3:SMAD4 heterotrimer regulates transcription	3/56	22/8846	0.000339835	0.00182808	0.000694883	Uba52/Ubb/Rps27a	3	3dpi	NonN_3
R-MMU-917937	Iron uptake and transport	4/56	55/8846	0.000386527	0.00204585	0.000777661	Uba52/Ubb/Atp6v0c/Rps27a	4	3dpi	NonN_3
R-MMU-174048	APC/C:Cdc20 mediated degradation of Cyclin B	3/56	23/8846	0.000389061	0.00204585	0.000777661	Uba52/Ubb/Rps27a	3	3dpi	NonN_3
R-MMU-8863795	Downregulation of ERBB2 signaling	3/56	24/8846	0.00044265	0.00230178	0.000874947	Uba52/Ubb/Rps27a	3	3dpi	NonN_3
R-MMU-179409	APC-Cdc20 mediated degradation of Nek2A	3/56	25/8846	0.000500761	0.00257309	0.000978075	Uba52/Ubb/Rps27a	3	3dpi	NonN_3
R-MMU-5610787	Hedgehog 'off' state	5/56	105/8846	0.000505821	0.00257309	0.000978075	Uba52/Ubb/Tuba1a/Rps27a/Tubb2a	5	3dpi	NonN_3
R-MMU-110314	Recognition of DNA damage by PCNA-containing replication complex	3/56	27/8846	0.000631153	0.00307687	0.00116957	Uba52/Ubb/Rps27a	3	3dpi	NonN_3
R-MMU-5213460	RIPK1-mediated regulated necrosis	3/56	27/8846	0.000631153	0.00307687	0.00116957	Uba52/Ubb/Rps27a	3	3dpi	NonN_3
R-MMU-5654732	Negative regulation of FGFR3 signaling	3/56	27/8846	0.000631153	0.00307687	0.00116957	Uba52/Ubb/Rps27a	3	3dpi	NonN_3
R-MMU-5675482	Regulation of necroptotic cell death	3/56	27/8846	0.000631153	0.00307687	0.00116957	Uba52/Ubb/Rps27a	3	3dpi	NonN_3
R-MMU-168164	Toll Like Receptor 3 (TLR3) Cascade	4/56	63/8846	0.000650237	0.00310521	0.00118034	Hmgb1/Uba52/Ubb/Rps27a	4	3dpi	NonN_3
R-MMU-373760	L1CAM interactions	4/56	63/8846	0.000650237	0.00310521	0.00118034	Actb/Actg1/Tuba1a/Tubb2a	4	3dpi	NonN_3
R-MMU-1834949	Cytosolic sensors of pathogen-associated DNA	3/56	28/8846	0.00070373	0.0031748	0.0012068	Uba52/Ubb/Rps27a	3	3dpi	NonN_3
R-MMU-5357956	TNFR1-induced NFkappaB signaling pathway	3/56	28/8846	0.00070373	0.0031748	0.0012068	Uba52/Ubb/Rps27a	3	3dpi	NonN_3
R-MMU-5689896	Ovarian tumor domain proteases	3/56	28/8846	0.00070373	0.0031748	0.0012068	Uba52/Ubb/Rps27a	3	3dpi	NonN_3
R-MMU-9607240	FLT3 Signaling	3/56	28/8846	0.00070373	0.0031748	0.0012068	Uba52/Ubb/Rps27a	3	3dpi	NonN_3
R-MMU-1234176	Oxygen-dependent proline hydroxylation of Hypoxia-inducible Factor Alpha	4/56	65/8846	0.000732174	0.0031748	0.0012068	Uba52/Elob/Ubb/Rps27a	4	3dpi	NonN_3
R-MMU-168142	Toll Like Receptor 10 (TLR10) Cascade	4/56	65/8846	0.000732174	0.0031748	0.0012068	Hmgb1/Uba52/Ubb/Rps27a	4	3dpi	NonN_3
R-MMU-168176	Toll Like Receptor 5 (TLR5) Cascade	4/56	65/8846	0.000732174	0.0031748	0.0012068	Hmgb1/Uba52/Ubb/Rps27a	4	3dpi	NonN_3
R-MMU-975871	MyD88 cascade initiated on plasma membrane	4/56	65/8846	0.000732174	0.0031748	0.0012068	Hmgb1/Uba52/Ubb/Rps27a	4	3dpi	NonN_3
R-MMU-166058	MyD88:MAL(TIRAP) cascade initiated on plasma membrane	4/56	66/8846	0.000775769	0.0031748	0.0012068	Hmgb1/Uba52/Ubb/Rps27a	4	3dpi	NonN_3
R-MMU-168179	Toll Like Receptor TLR1:TLR2 Cascade	4/56	66/8846	0.000775769	0.0031748	0.0012068	Hmgb1/Uba52/Ubb/Rps27a	4	3dpi	NonN_3
R-MMU-168188	Toll Like Receptor TLR6:TLR2 Cascade	4/56	66/8846	0.000775769	0.0031748	0.0012068	Hmgb1/Uba52/Ubb/Rps27a	4	3dpi	NonN_3
R-MMU-181438	Toll Like Receptor 2 (TLR2) Cascade	4/56	66/8846	0.000775769	0.0031748	0.0012068	Hmgb1/Uba52/Ubb/Rps27a	4	3dpi	NonN_3
R-MMU-1236394	Signaling by ERBB4	3/56	29/8846	0.00078142	0.0031748	0.0012068	Uba52/Ubb/Rps27a	3	3dpi	NonN_3
R-MMU-3769402	Deactivation of the beta-catenin transactivating complex	3/56	29/8846	0.00078142	0.0031748	0.0012068	Uba52/Ubb/Rps27a	3	3dpi	NonN_3
R-MMU-5656169	Termination of translesion DNA synthesis	3/56	29/8846	0.00078142	0.0031748	0.0012068	Uba52/Ubb/Rps27a	3	3dpi	NonN_3
R-MMU-8866652	Synthesis of active ubiquitin: roles of E1 and E2 enzymes	3/56	29/8846	0.00078142	0.0031748	0.0012068	Uba52/Ubb/Rps27a	3	3dpi	NonN_3
R-MMU-917729	Endosomal Sorting Complex Required For Transport (ESCRT)	3/56	29/8846	0.00078142	0.0031748	0.0012068	Uba52/Ubb/Rps27a	3	3dpi	NonN_3
R-MMU-69275	G2/M Transition	6/56	175/8846	0.000786917	0.0031748	0.0012068	Uba52/Ubb/Dynll1/Tuba1a/Rps27a/Tubb2a	6	3dpi	NonN_3
R-MMU-453274	Mitotic G2-G2/M phases	6/56	177/8846	0.000835139	0.00334056	0.0012698	Uba52/Ubb/Dynll1/Tuba1a/Rps27a/Tubb2a	6	3dpi	NonN_3
R-MMU-182971	EGFR downregulation	3/56	30/8846	0.000864364	0.00337102	0.00128138	Uba52/Ubb/Rps27a	3	3dpi	NonN_3
R-MMU-5654726	Negative regulation of FGFR1 signaling	3/56	30/8846	0.000864364	0.00337102	0.00128138	Uba52/Ubb/Rps27a	3	3dpi	NonN_3
R-MMU-5654733	Negative regulation of FGFR4 signaling	3/56	30/8846	0.000864364	0.00337102	0.00128138	Uba52/Ubb/Rps27a	3	3dpi	NonN_3
R-MMU-1234174	Cellular response to hypoxia	4/56	69/8846	0.000917552	0.00351979	0.00133793	Uba52/Elob/Ubb/Rps27a	4	3dpi	NonN_3
R-MMU-975138	TRAF6 mediated induction of NFkB and MAP kinases upon TLR7/8 or 9 activation	4/56	69/8846	0.000917552	0.00351979	0.00133793	Hmgb1/Uba52/Ubb/Rps27a	4	3dpi	NonN_3
R-MMU-2467813	Separation of Sister Chromatids	6/56	181/8846	0.000938425	0.00357059	0.00135724	Uba52/Ubb/Dynll1/Tuba1a/Rps27a/Tubb2a	6	3dpi	NonN_3
R-MMU-975155	MyD88 dependent cascade initiated on endosome	4/56	70/8846	0.000968616	0.00365574	0.00138961	Hmgb1/Uba52/Ubb/Rps27a	4	3dpi	NonN_3
R-MMU-168181	Toll Like Receptor 7/8 (TLR7/8) Cascade	4/56	71/8846	0.00102165	0.00382506	0.00145397	Hmgb1/Uba52/Ubb/Rps27a	4	3dpi	NonN_3
R-MMU-168638	NOD1/2 Signaling Pathway	3/56	32/8846	0.00104656	0.0038566	0.00146596	Uba52/Ubb/Rps27a	3	3dpi	NonN_3
R-MMU-5654727	Negative regulation of FGFR2 signaling	3/56	32/8846	0.00104656	0.0038566	0.00146596	Uba52/Ubb/Rps27a	3	3dpi	NonN_3
R-MMU-422475	Axon guidance	7/56	256/8846	0.00108159	0.00395455	0.00150319	Actb/Actg1/Uba52/Ubb/Tuba1a/Rps27a/Tubb2a	7	3dpi	NonN_3
R-MMU-9675108	Nervous system development	7/56	257/8846	0.00110646	0.00401415	0.00152585	Actb/Actg1/Uba52/Ubb/Tuba1a/Rps27a/Tubb2a	7	3dpi	NonN_3
R-MMU-5696399	Global Genome Nucleotide Excision Repair (GG-NER)	4/56	73/8846	0.00113379	0.00403278	0.00153293	Actb/Uba52/Ubb/Rps27a	4	3dpi	NonN_3
R-MMU-2173793	Transcriptional activity of SMAD2/SMAD3:SMAD4 heterotrimer	3/56	33/8846	0.00114607	0.00403278	0.00153293	Uba52/Ubb/Rps27a	3	3dpi	NonN_3
R-MMU-5357905	Regulation of TNFR1 signaling	3/56	33/8846	0.00114607	0.00403278	0.00153293	Uba52/Ubb/Rps27a	3	3dpi	NonN_3
R-MMU-6783310	Fanconi Anemia Pathway	3/56	33/8846	0.00114607	0.00403278	0.00153293	Uba52/Ubb/Rps27a	3	3dpi	NonN_3
R-MMU-1168372	Downstream signaling events of B Cell Receptor (BCR)	4/56	74/8846	0.00119299	0.00415492	0.00157935	Uba52/Ubb/Rps27a/Calm2	4	3dpi	NonN_3
R-MMU-5357801	Programmed Cell Death	5/56	127/8846	0.00119853	0.00415492	0.00157935	Hmgb1/Uba52/Ubb/Dynll1/Rps27a	5	3dpi	NonN_3
R-MMU-6804757	Regulation of TP53 Degradation	3/56	34/8846	0.00125137	0.00425377	0.00161693	Uba52/Ubb/Rps27a	3	3dpi	NonN_3
R-MMU-6806003	Regulation of TP53 Expression and Degradation	3/56	34/8846	0.00125137	0.00425377	0.00161693	Uba52/Ubb/Rps27a	3	3dpi	NonN_3
R-MMU-168138	Toll Like Receptor 9 (TLR9) Cascade	4/56	75/8846	0.00125432	0.00425377	0.00161693	Hmgb1/Uba52/Ubb/Rps27a	4	3dpi	NonN_3
R-MMU-5689901	Metalloprotease DUBs	3/56	35/8846	0.00136257	0.00458765	0.00174384	Uba52/Ubb/Rps27a	3	3dpi	NonN_3
R-MMU-5663220	RHO GTPases Activate Formins	5/56	131/8846	0.00137639	0.00460107	0.00174895	Actb/Actg1/Dynll1/Tuba1a/Tubb2a	5	3dpi	NonN_3
R-MMU-110313	Translesion synthesis by Y family DNA polymerases bypasses lesions on DNA template	3/56	36/8846	0.0014798	0.0048771	0.00185387	Uba52/Ubb/Rps27a	3	3dpi	NonN_3
R-MMU-5696400	Dual Incision in GG-NER	3/56	36/8846	0.0014798	0.0048771	0.00185387	Uba52/Ubb/Rps27a	3	3dpi	NonN_3
R-MMU-5654741	Signaling by FGFR3	3/56	37/8846	0.00160319	0.0052468	0.0019944	Uba52/Ubb/Rps27a	3	3dpi	NonN_3
R-MMU-5358351	Signaling by Hedgehog	5/56	136/8846	0.0016253	0.00528223	0.00200787	Uba52/Ubb/Tuba1a/Rps27a/Tubb2a	5	3dpi	NonN_3
R-MMU-166166	MyD88-independent TLR4 cascade	4/56	82/8846	0.00174686	0.00556143	0.002114	Hmgb1/Uba52/Ubb/Rps27a	4	3dpi	NonN_3
R-MMU-450531	Regulation of mRNA stability by proteins that bind AU-rich elements	4/56	82/8846	0.00174686	0.00556143	0.002114	Hspa8/Uba52/Ubb/Rps27a	4	3dpi	NonN_3
R-MMU-937061	TRIF(TICAM1)-mediated TLR4 signaling	4/56	82/8846	0.00174686	0.00556143	0.002114	Hmgb1/Uba52/Ubb/Rps27a	4	3dpi	NonN_3
R-MMU-157118	Signaling by NOTCH	3/56	39/8846	0.00186887	0.00583087	0.00221641	Uba52/Ubb/Rps27a	3	3dpi	NonN_3
R-MMU-5654743	Signaling by FGFR4	3/56	39/8846	0.00186887	0.00583087	0.00221641	Uba52/Ubb/Rps27a	3	3dpi	NonN_3
R-MMU-5696395	Formation of Incision Complex in GG-NER	3/56	39/8846	0.00186887	0.00583087	0.00221641	Uba52/Ubb/Rps27a	3	3dpi	NonN_3
R-MMU-512988	Interleukin-3, Interleukin-5 and GM-CSF signaling	3/56	40/8846	0.00201139	0.00619296	0.00235405	Uba52/Ubb/Rps27a	3	3dpi	NonN_3
R-MMU-5675221	Negative regulation of MAPK pathway	3/56	40/8846	0.00201139	0.00619296	0.00235405	Uba52/Ubb/Rps27a	3	3dpi	NonN_3
R-MMU-69231	Cyclin D associated events in G1	3/56	41/8846	0.0021605	0.00652669	0.0024809	Uba52/Ubb/Rps27a	3	3dpi	NonN_3
R-MMU-69236	G1 Phase	3/56	41/8846	0.0021605	0.00652669	0.0024809	Uba52/Ubb/Rps27a	3	3dpi	NonN_3
R-MMU-68882	Mitotic Anaphase	6/56	213/8846	0.00216162	0.00652669	0.0024809	Uba52/Ubb/Dynll1/Tuba1a/Rps27a/Tubb2a	6	3dpi	NonN_3
R-MMU-2555396	Mitotic Metaphase and Anaphase	6/56	214/8846	0.00221323	0.00663968	0.00252385	Uba52/Ubb/Dynll1/Tuba1a/Rps27a/Tubb2a	6	3dpi	NonN_3
R-MMU-1227986	Signaling by ERBB2	3/56	42/8846	0.00231633	0.00686101	0.00260799	Uba52/Ubb/Rps27a	3	3dpi	NonN_3
R-MMU-75893	TNF signaling	3/56	42/8846	0.00231633	0.00686101	0.00260799	Uba52/Ubb/Rps27a	3	3dpi	NonN_3
R-MMU-5607764	CLEC7A (Dectin-1) signaling	4/56	89/8846	0.00236009	0.00694669	0.00264055	Uba52/Ubb/Rps27a/Calm2	4	3dpi	NonN_3
R-MMU-8848021	Signaling by PTK6	3/56	43/8846	0.00247895	0.0072059	0.00273908	Uba52/Ubb/Rps27a	3	3dpi	NonN_3
R-MMU-9006927	Signaling by Non-Receptor Tyrosine Kinases	3/56	43/8846	0.00247895	0.0072059	0.00273908	Uba52/Ubb/Rps27a	3	3dpi	NonN_3
R-MMU-5689603	UCH proteinases	4/56	93/8846	0.00277002	0.00800227	0.0030418	Actb/Uba52/Ubb/Rps27a	4	3dpi	NonN_3
R-MMU-177929	Signaling by EGFR	3/56	45/8846	0.00282502	0.00806165	0.00306437	Uba52/Ubb/Rps27a	3	3dpi	NonN_3
R-MMU-73893	DNA Damage Bypass	3/56	45/8846	0.00282502	0.00806165	0.00306437	Uba52/Ubb/Rps27a	3	3dpi	NonN_3
R-MMU-9020702	Interleukin-1 signaling	4/56	94/8846	0.00287966	0.00816776	0.0031047	Hmgb1/Uba52/Ubb/Rps27a	4	3dpi	NonN_3
R-MMU-168643	Nucleotide-binding domain, leucine rich repeat containing receptor (NLR) signaling pathways	3/56	46/8846	0.00300866	0.00843145	0.00320494	Uba52/Ubb/Rps27a	3	3dpi	NonN_3
R-MMU-5654736	Signaling by FGFR1	3/56	46/8846	0.00300866	0.00843145	0.00320494	Uba52/Ubb/Rps27a	3	3dpi	NonN_3
R-MMU-166016	Toll Like Receptor 4 (TLR4) Cascade	4/56	97/8846	0.00322638	0.0089346	0.00339619	Hmgb1/Uba52/Ubb/Rps27a	4	3dpi	NonN_3
R-MMU-2672351	Stimuli-sensing channels	4/56	97/8846	0.00322638	0.0089346	0.00339619	Uba52/Ubb/Rps27a/Calm2	4	3dpi	NonN_3
R-MMU-983705	Signaling by the B Cell Receptor (BCR)	4/56	98/8846	0.00334802	0.0092169	0.0035035	Uba52/Ubb/Rps27a/Calm2	4	3dpi	NonN_3
R-MMU-6811436	COPI-independent Golgi-to-ER retrograde traffic	3/56	48/8846	0.00339759	0.0092446	0.00351403	Dynll1/Tuba1a/Tubb2a	3	3dpi	NonN_3
R-MMU-8866654	E3 ubiquitin ligases ubiquitinate target proteins	3/56	48/8846	0.00339759	0.0092446	0.00351403	Uba52/Ubb/Rps27a	3	3dpi	NonN_3
R-MMU-5696398	Nucleotide Excision Repair	4/56	99/8846	0.00347275	0.0093945	0.00357101	Actb/Uba52/Ubb/Rps27a	4	3dpi	NonN_3
R-MMU-6781823	Formation of TC-NER Pre-Incision Complex	3/56	50/8846	0.00381599	0.0102051	0.00387911	Uba52/Ubb/Rps27a	3	3dpi	NonN_3
R-MMU-75815	Ubiquitin-dependent degradation of Cyclin D	3/56	50/8846	0.00381599	0.0102051	0.00387911	Uba52/Ubb/Rps27a	3	3dpi	NonN_3
R-MMU-76002	Platelet activation, signaling and aggregation	6/56	241/8846	0.00399349	0.0103227	0.00392385	Actg1/Aldoa/Cd9/Cd63/Tmsb4x/Calm2	6	3dpi	NonN_3
R-MMU-349425	Autodegradation of the E3 ubiquitin ligase COP1	3/56	51/8846	0.00403645	0.0103227	0.00392385	Uba52/Ubb/Rps27a	3	3dpi	NonN_3
R-MMU-448424	Interleukin-17 signaling	3/56	51/8846	0.00403645	0.0103227	0.00392385	Uba52/Ubb/Rps27a	3	3dpi	NonN_3
R-MMU-450294	MAP kinase activation	3/56	51/8846	0.00403645	0.0103227	0.00392385	Uba52/Ubb/Rps27a	3	3dpi	NonN_3
R-MMU-69601	Ubiquitin Mediated Degradation of Phosphorylated Cdc25A	3/56	51/8846	0.00403645	0.0103227	0.00392385	Uba52/Ubb/Rps27a	3	3dpi	NonN_3
R-MMU-69610	p53-Independent DNA Damage Response	3/56	51/8846	0.00403645	0.0103227	0.00392385	Uba52/Ubb/Rps27a	3	3dpi	NonN_3
R-MMU-69613	p53-Independent G1/S DNA damage checkpoint	3/56	51/8846	0.00403645	0.0103227	0.00392385	Uba52/Ubb/Rps27a	3	3dpi	NonN_3
R-MMU-8939902	Regulation of RUNX2 expression and activity	3/56	51/8846	0.00403645	0.0103227	0.00392385	Uba52/Ubb/Rps27a	3	3dpi	NonN_3
R-MMU-8932339	ROS sensing by NFE2L2	3/56	52/8846	0.00426453	0.0107688	0.00409339	Uba52/Ubb/Rps27a	3	3dpi	NonN_3
R-MMU-8941858	Regulation of RUNX3 expression and activity	3/56	52/8846	0.00426453	0.0107688	0.00409339	Uba52/Ubb/Rps27a	3	3dpi	NonN_3
R-MMU-983712	Ion channel transport	5/56	170/8846	0.00427989	0.0107688	0.00409339	Uba52/Ubb/Atp6v0c/Rps27a/Calm2	5	3dpi	NonN_3
R-MMU-190840	Microtubule-dependent trafficking of connexons from Golgi to the plasma membrane	2/56	16/8846	0.00446228	0.0111436	0.00423588	Tuba1a/Tubb2a	2	3dpi	NonN_3
R-MMU-170834	Signaling by TGF-beta Receptor Complex	3/56	53/8846	0.00450031	0.0111436	0.00423588	Uba52/Ubb/Rps27a	3	3dpi	NonN_3
R-MMU-8854050	FBXL7 down-regulates AURKA during mitotic entry and in early mitosis	3/56	53/8846	0.00450031	0.0111436	0.00423588	Uba52/Ubb/Rps27a	3	3dpi	NonN_3
R-MMU-446652	Interleukin-1 family signaling	4/56	107/8846	0.00458655	0.0112383	0.00427185	Hmgb1/Uba52/Ubb/Rps27a	4	3dpi	NonN_3
R-MMU-5621481	C-type lectin receptors (CLRs)	4/56	107/8846	0.00458655	0.0112383	0.00427185	Uba52/Ubb/Rps27a/Calm2	4	3dpi	NonN_3
R-MMU-4641257	Degradation of AXIN	3/56	54/8846	0.00474385	0.0115631	0.00439534	Uba52/Ubb/Rps27a	3	3dpi	NonN_3
R-MMU-5610780	Degradation of GLI1 by the proteasome	3/56	55/8846	0.00499523	0.0119656	0.00454831	Uba52/Ubb/Rps27a	3	3dpi	NonN_3
R-MMU-5620924	Intraflagellar transport	3/56	55/8846	0.00499523	0.0119656	0.00454831	Dynll1/Tuba1a/Tubb2a	3	3dpi	NonN_3
R-MMU-69541	Stabilization of p53	3/56	55/8846	0.00499523	0.0119656	0.00454831	Uba52/Ubb/Rps27a	3	3dpi	NonN_3
R-MMU-190872	Transport of connexons to the plasma membrane	2/56	17/8846	0.00503678	0.0119656	0.00454831	Tuba1a/Tubb2a	2	3dpi	NonN_3
R-MMU-446353	Cell-extracellular matrix interactions	2/56	17/8846	0.00503678	0.0119656	0.00454831	Actb/Actg1	2	3dpi	NonN_3
R-MMU-446203	Asparagine N-linked glycosylation	6/56	254/8846	0.00515642	0.0121739	0.00462749	Uba52/Ubb/Dynll1/Tuba1a/Rps27a/Tubb2a	6	3dpi	NonN_3
R-MMU-4641258	Degradation of DVL	3/56	56/8846	0.00525453	0.0121739	0.00462749	Uba52/Ubb/Rps27a	3	3dpi	NonN_3
R-MMU-5607761	Dectin-1 mediated noncanonical NF-kB signaling	3/56	56/8846	0.00525453	0.0121739	0.00462749	Uba52/Ubb/Rps27a	3	3dpi	NonN_3
R-MMU-5610785	GLI3 is processed to GLI3R by the proteasome	3/56	56/8846	0.00525453	0.0121739	0.00462749	Uba52/Ubb/Rps27a	3	3dpi	NonN_3
R-MMU-5676590	NIK-->noncanonical NF-kB signaling	3/56	56/8846	0.00525453	0.0121739	0.00462749	Uba52/Ubb/Rps27a	3	3dpi	NonN_3
R-MMU-5685942	HDR through Homologous Recombination (HRR)	3/56	57/8846	0.00552181	0.0126677	0.0048152	Uba52/Ubb/Rps27a	3	3dpi	NonN_3
R-MMU-68827	CDT1 association with the CDC6:ORC:origin complex	3/56	57/8846	0.00552181	0.0126677	0.0048152	Uba52/Ubb/Rps27a	3	3dpi	NonN_3
R-MMU-5673001	RAF/MAP kinase cascade	6/56	259/8846	0.00566431	0.0129312	0.00491537	Actb/Actg1/Uba52/Ubb/Rps27a/Calm2	6	3dpi	NonN_3
R-MMU-187577	SCF(Skp2)-mediated degradation of p27/p21	3/56	59/8846	0.00608058	0.0137308	0.00521931	Uba52/Ubb/Rps27a	3	3dpi	NonN_3
R-MMU-6782210	Gap-filling DNA repair synthesis and ligation in TC-NER	3/56	59/8846	0.00608058	0.0137308	0.00521931	Uba52/Ubb/Rps27a	3	3dpi	NonN_3
R-MMU-2454202	Fc epsilon receptor (FCERI) signaling	4/56	116/8846	0.00610258	0.0137308	0.00521931	Uba52/Ubb/Rps27a/Calm2	4	3dpi	NonN_3
R-MMU-5684996	MAPK1/MAPK3 signaling	6/56	265/8846	0.00632128	0.0141336	0.00537242	Actb/Actg1/Uba52/Ubb/Rps27a/Calm2	6	3dpi	NonN_3
R-MMU-6782135	Dual incision in TC-NER	3/56	60/8846	0.0063722	0.0141336	0.00537242	Uba52/Ubb/Rps27a	3	3dpi	NonN_3
R-MMU-9707587	Regulation of HMOX1 expression and activity	3/56	60/8846	0.0063722	0.0141336	0.00537242	Uba52/Ubb/Rps27a	3	3dpi	NonN_3
R-MMU-4608870	Asymmetric localization of PCP proteins	3/56	61/8846	0.00667205	0.0146597	0.00557241	Uba52/Ubb/Rps27a	3	3dpi	NonN_3
R-MMU-5358346	Hedgehog ligand biogenesis	3/56	61/8846	0.00667205	0.0146597	0.00557241	Uba52/Ubb/Rps27a	3	3dpi	NonN_3
R-MMU-1169091	Activation of NF-kappaB in B cells	3/56	62/8846	0.0069802	0.0151941	0.00577554	Uba52/Ubb/Rps27a	3	3dpi	NonN_3
R-MMU-8878166	Transcriptional regulation by RUNX2	3/56	62/8846	0.0069802	0.0151941	0.00577554	Uba52/Ubb/Rps27a	3	3dpi	NonN_3
R-MMU-3858494	Beta-catenin independent WNT signaling	4/56	121/8846	0.00707407	0.0153271	0.00582611	Uba52/Ubb/Rps27a/Calm2	4	3dpi	NonN_3
R-MMU-174084	Autodegradation of Cdh1 by Cdh1:APC/C	3/56	63/8846	0.00729669	0.0154518	0.0058735	Uba52/Ubb/Rps27a	3	3dpi	NonN_3
R-MMU-5693565	Recruitment and ATM-mediated phosphorylation of repair and signaling proteins at DNA double strand breaks	3/56	63/8846	0.00729669	0.0154518	0.0058735	Uba52/Ubb/Rps27a	3	3dpi	NonN_3
R-MMU-69563	p53-Dependent G1 DNA Damage Response	3/56	63/8846	0.00729669	0.0154518	0.0058735	Uba52/Ubb/Rps27a	3	3dpi	NonN_3
R-MMU-69580	p53-Dependent G1/S DNA damage checkpoint	3/56	63/8846	0.00729669	0.0154518	0.0058735	Uba52/Ubb/Rps27a	3	3dpi	NonN_3
R-MMU-9033241	Peroxisomal protein import	3/56	63/8846	0.00729669	0.0154518	0.0058735	Uba52/Ubb/Rps27a	3	3dpi	NonN_3
R-MMU-5693606	DNA Double Strand Break Response	3/56	64/8846	0.0076216	0.0160672	0.0061074	Uba52/Ubb/Rps27a	3	3dpi	NonN_3
R-MMU-204998	Cell death signalling via NRAGE, NRIF and NADE	3/56	65/8846	0.00795496	0.0165463	0.00628953	Uba52/Ubb/Rps27a	3	3dpi	NonN_3
R-MMU-69615	G1/S DNA Damage Checkpoints	3/56	65/8846	0.00795496	0.0165463	0.00628953	Uba52/Ubb/Rps27a	3	3dpi	NonN_3
R-MMU-8939236	RUNX1 regulates transcription of genes involved in differentiation of HSCs	3/56	65/8846	0.00795496	0.0165463	0.00628953	Uba52/Ubb/Rps27a	3	3dpi	NonN_3
R-MMU-168898	Toll-like Receptor Cascades	4/56	126/8846	0.00814304	0.0168626	0.00640975	Hmgb1/Uba52/Ubb/Rps27a	4	3dpi	NonN_3
R-MMU-5658442	Regulation of RAS by GAPs	3/56	66/8846	0.00829682	0.0170303	0.00647351	Uba52/Ubb/Rps27a	3	3dpi	NonN_3
R-MMU-68867	Assembly of the pre-replicative complex	3/56	66/8846	0.00829682	0.0170303	0.00647351	Uba52/Ubb/Rps27a	3	3dpi	NonN_3
R-MMU-174154	APC/C:Cdc20 mediated degradation of Securin	3/56	67/8846	0.00864724	0.0175191	0.0066593	Uba52/Ubb/Rps27a	3	3dpi	NonN_3
R-MMU-5654738	Signaling by FGFR2	3/56	67/8846	0.00864724	0.0175191	0.0066593	Uba52/Ubb/Rps27a	3	3dpi	NonN_3
R-MMU-8948751	Regulation of PTEN stability and activity	3/56	67/8846	0.00864724	0.0175191	0.0066593	Uba52/Ubb/Rps27a	3	3dpi	NonN_3
R-MMU-8852135	Protein ubiquitination	3/56	68/8846	0.00900627	0.0181678	0.00690589	Uba52/Ubb/Rps27a	3	3dpi	NonN_3
R-MMU-210991	Basigin interactions	2/56	23/8846	0.00914507	0.0183686	0.00698223	Bsg/Ppia	2	3dpi	NonN_3
R-MMU-5683057	MAPK family signaling cascades	6/56	288/8846	0.00936305	0.018589	0.00706599	Actb/Actg1/Uba52/Ubb/Rps27a/Calm2	6	3dpi	NonN_3
R-MMU-68949	Orc1 removal from chromatin	3/56	69/8846	0.00937394	0.018589	0.00706599	Uba52/Ubb/Rps27a	3	3dpi	NonN_3
R-MMU-69202	Cyclin E associated events during G1/S transition	3/56	69/8846	0.00937394	0.018589	0.00706599	Uba52/Ubb/Rps27a	3	3dpi	NonN_3
R-MMU-6781827	Transcription-Coupled Nucleotide Excision Repair (TC-NER)	3/56	70/8846	0.00975029	0.0192537	0.00731867	Uba52/Ubb/Rps27a	3	3dpi	NonN_3
R-MMU-69656	Cyclin A:Cdk2-associated events at S phase entry	3/56	71/8846	0.0101354	0.0199301	0.00757576	Uba52/Ubb/Rps27a	3	3dpi	NonN_3
R-MMU-174184	Cdc20:Phospho-APC/C mediated degradation of Cyclin A	3/56	72/8846	0.0105292	0.0204468	0.00777218	Uba52/Ubb/Rps27a	3	3dpi	NonN_3
[truncated: 39,955 more rows]
