# Supplementary material for: Molecular Consequences of Peripheral Influenza A Infection on Cell Populations in the Murine Hypothalamus
Source: bioRxiv preprint, doi:10.1101/2023.03.06.530999, version 2 (2023-06-19)
Supplement: Supplemental Table 8 [file 530999_file10.xlsx]

## Sheet: Sheet 1
GO.ID	Term	Annotated	Significant	Expected	pval_fisher	pval_elim	dpi	ontology	cluster	GO.Term	Genes	No.DEGs	DEGs	No.TotalDEGs
GO:0006412	translation	86	43	7.67	3.0e-25	9.6e-15	3dpi	BP	NonN_8	GO:0006412	Eif1, Fau, Ndufa7, Rpl11, Rpl13, Rpl14, Rpl17, Rpl18a, Rpl19, Rpl21, Rpl23, Rpl24, Rpl27a, Rpl28, Rpl3, Rpl30, Rpl35, Rpl36, Rpl37, Rpl37a, Rpl38, Rpl41, Rpl6, Rpl7, Rpl8, Rpl9, Rplp1, Rplp2, Rps11, Rps13, Rps14, Rps2, Rps20, Rps21, Rps24, Rps27a, Rps29, Rps3, Rps4x, Rps5, Rps8, Rpsa, Samd4	144	Kcnb2, Rbfox3, Cdh18, Hs3st4, Grik1, Trhde, Dpp6, Sgcd, Pcdh10, Ntrk3, Slc8a3, Pcdh11x, Upp2, Meg3, Samd4, Cntnap2, Tmem132b, Mctp1, Jakmip2, Dner, Cacnb4, Kif26b, D430041D05Rik, Naaladl2, Sgcz, Brinp1, Xkr6, Atp8a2, Stxbp1, Dnajc6, Brinp3, Rps2, Diaph2, Igsf8, Rpsa, Plcl1, Ubc, Ifitm3, Epas1, Cobll1, Rps4x, Actb, Rpl3, Cfl1, Cdc42, Spock2, ENSMUSG00000040904, Rps29, Rps24, B2m, Atp6v0c, Rap1a, R…	1619
GO:0043043	peptide biosynthetic process	87	43	7.76	5.6e-25	1.00000	3dpi	BP	NonN_8	GO:0043043	Eif1, Fau, Ndufa7, Rpl11, Rpl13, Rpl14, Rpl17, Rpl18a, Rpl19, Rpl21, Rpl23, Rpl24, Rpl27a, Rpl28, Rpl3, Rpl30, Rpl35, Rpl36, Rpl37, Rpl37a, Rpl38, Rpl41, Rpl6, Rpl7, Rpl8, Rpl9, Rplp1, Rplp2, Rps11, Rps13, Rps14, Rps2, Rps20, Rps21, Rps24, Rps27a, Rps29, Rps3, Rps4x, Rps5, Rps8, Rpsa, Samd4	144	Kcnb2, Rbfox3, Cdh18, Hs3st4, Grik1, Trhde, Dpp6, Sgcd, Pcdh10, Ntrk3, Slc8a3, Pcdh11x, Upp2, Meg3, Samd4, Cntnap2, Tmem132b, Mctp1, Jakmip2, Dner, Cacnb4, Kif26b, D430041D05Rik, Naaladl2, Sgcz, Brinp1, Xkr6, Atp8a2, Stxbp1, Dnajc6, Brinp3, Rps2, Diaph2, Igsf8, Rpsa, Plcl1, Ubc, Ifitm3, Epas1, Cobll1, Rps4x, Actb, Rpl3, Cfl1, Cdc42, Spock2, ENSMUSG00000040904, Rps29, Rps24, B2m, Atp6v0c, Rap1a, R…	1619
GO:0006518	peptide metabolic process	113	46	10.08	2.8e-22	0.24992	3dpi	BP	NonN_8	GO:0006518	Eif1, Fau, Gpx4, Gstp1, Ndufa7, Rpl11, Rpl13, Rpl14, Rpl17, Rpl18a, Rpl19, Rpl21, Rpl23, Rpl24, Rpl27a, Rpl28, Rpl3, Rpl30, Rpl35, Rpl36, Rpl37, Rpl37a, Rpl38, Rpl41, Rpl6, Rpl7, Rpl8, Rpl9, Rplp1, Rplp2, Rps11, Rps13, Rps14, Rps2, Rps20, Rps21, Rps24, Rps27a, Rps29, Rps3, Rps4x, Rps5, Rps8, Rpsa, Samd4, Trhde	144	Kcnb2, Rbfox3, Cdh18, Hs3st4, Grik1, Trhde, Dpp6, Sgcd, Pcdh10, Ntrk3, Slc8a3, Pcdh11x, Upp2, Meg3, Samd4, Cntnap2, Tmem132b, Mctp1, Jakmip2, Dner, Cacnb4, Kif26b, D430041D05Rik, Naaladl2, Sgcz, Brinp1, Xkr6, Atp8a2, Stxbp1, Dnajc6, Brinp3, Rps2, Diaph2, Igsf8, Rpsa, Plcl1, Ubc, Ifitm3, Epas1, Cobll1, Rps4x, Actb, Rpl3, Cfl1, Cdc42, Spock2, ENSMUSG00000040904, Rps29, Rps24, B2m, Atp6v0c, Rap1a, R…	1619
GO:0043604	amide biosynthetic process	100	43	8.92	7.0e-22	1.00000	3dpi	BP	NonN_8	GO:0043604	Eif1, Fau, Ndufa7, Rpl11, Rpl13, Rpl14, Rpl17, Rpl18a, Rpl19, Rpl21, Rpl23, Rpl24, Rpl27a, Rpl28, Rpl3, Rpl30, Rpl35, Rpl36, Rpl37, Rpl37a, Rpl38, Rpl41, Rpl6, Rpl7, Rpl8, Rpl9, Rplp1, Rplp2, Rps11, Rps13, Rps14, Rps2, Rps20, Rps21, Rps24, Rps27a, Rps29, Rps3, Rps4x, Rps5, Rps8, Rpsa, Samd4	144	Kcnb2, Rbfox3, Cdh18, Hs3st4, Grik1, Trhde, Dpp6, Sgcd, Pcdh10, Ntrk3, Slc8a3, Pcdh11x, Upp2, Meg3, Samd4, Cntnap2, Tmem132b, Mctp1, Jakmip2, Dner, Cacnb4, Kif26b, D430041D05Rik, Naaladl2, Sgcz, Brinp1, Xkr6, Atp8a2, Stxbp1, Dnajc6, Brinp3, Rps2, Diaph2, Igsf8, Rpsa, Plcl1, Ubc, Ifitm3, Epas1, Cobll1, Rps4x, Actb, Rpl3, Cfl1, Cdc42, Spock2, ENSMUSG00000040904, Rps29, Rps24, B2m, Atp6v0c, Rap1a, R…	1619
GO:0043603	cellular amide metabolic process	136	46	12.13	2.6e-18	0.63735	3dpi	BP	NonN_8	GO:0043603	Eif1, Fau, Gpx4, Gstp1, Ndufa7, Rpl11, Rpl13, Rpl14, Rpl17, Rpl18a, Rpl19, Rpl21, Rpl23, Rpl24, Rpl27a, Rpl28, Rpl3, Rpl30, Rpl35, Rpl36, Rpl37, Rpl37a, Rpl38, Rpl41, Rpl6, Rpl7, Rpl8, Rpl9, Rplp1, Rplp2, Rps11, Rps13, Rps14, Rps2, Rps20, Rps21, Rps24, Rps27a, Rps29, Rps3, Rps4x, Rps5, Rps8, Rpsa, Samd4, Trhde	144	Kcnb2, Rbfox3, Cdh18, Hs3st4, Grik1, Trhde, Dpp6, Sgcd, Pcdh10, Ntrk3, Slc8a3, Pcdh11x, Upp2, Meg3, Samd4, Cntnap2, Tmem132b, Mctp1, Jakmip2, Dner, Cacnb4, Kif26b, D430041D05Rik, Naaladl2, Sgcz, Brinp1, Xkr6, Atp8a2, Stxbp1, Dnajc6, Brinp3, Rps2, Diaph2, Igsf8, Rpsa, Plcl1, Ubc, Ifitm3, Epas1, Cobll1, Rps4x, Actb, Rpl3, Cfl1, Cdc42, Spock2, ENSMUSG00000040904, Rps29, Rps24, B2m, Atp6v0c, Rap1a, R…	1619
GO:1901566	organonitrogen compound biosynthetic pro...	180	51	16.05	1.3e-16	0.25427	3dpi	BP	NonN_8	GO:1901566	Aldoa, Atp5j, Atp5j2, Ckb, Eif1, Epas1, Fau, Gstp1, Itm2b, Ndufa7, Ndufc2, Rpl11, Rpl13, Rpl14, Rpl17, Rpl18a, Rpl19, Rpl21, Rpl23, Rpl24, Rpl27a, Rpl28, Rpl3, Rpl30, Rpl35, Rpl36, Rpl37, Rpl37a, Rpl38, Rpl41, Rpl6, Rpl7, Rpl8, Rpl9, Rplp1, Rplp2, Rps11, Rps13, Rps14, Rps2, Rps20, Rps21, Rps24, Rps27a, Rps29, Rps3, Rps4x, Rps5, Rps8, Rpsa, Samd4	144	Kcnb2, Rbfox3, Cdh18, Hs3st4, Grik1, Trhde, Dpp6, Sgcd, Pcdh10, Ntrk3, Slc8a3, Pcdh11x, Upp2, Meg3, Samd4, Cntnap2, Tmem132b, Mctp1, Jakmip2, Dner, Cacnb4, Kif26b, D430041D05Rik, Naaladl2, Sgcz, Brinp1, Xkr6, Atp8a2, Stxbp1, Dnajc6, Brinp3, Rps2, Diaph2, Igsf8, Rpsa, Plcl1, Ubc, Ifitm3, Epas1, Cobll1, Rps4x, Actb, Rpl3, Cfl1, Cdc42, Spock2, ENSMUSG00000040904, Rps29, Rps24, B2m, Atp6v0c, Rap1a, R…	1619
GO:0042254	ribosome biogenesis	28	18	2.5	2.6e-13	1.00000	3dpi	BP	NonN_8	GO:0042254	Rpl11, Rpl14, Rpl24, Rpl27, Rpl3, Rpl35, Rpl38, Rpl6, Rpl7, Rps14, Rps2, Rps21, Rps24, Rps27, Rps27rt, Rps5, Rps8, Rpsa	144	Kcnb2, Rbfox3, Cdh18, Hs3st4, Grik1, Trhde, Dpp6, Sgcd, Pcdh10, Ntrk3, Slc8a3, Pcdh11x, Upp2, Meg3, Samd4, Cntnap2, Tmem132b, Mctp1, Jakmip2, Dner, Cacnb4, Kif26b, D430041D05Rik, Naaladl2, Sgcz, Brinp1, Xkr6, Atp8a2, Stxbp1, Dnajc6, Brinp3, Rps2, Diaph2, Igsf8, Rpsa, Plcl1, Ubc, Ifitm3, Epas1, Cobll1, Rps4x, Actb, Rpl3, Cfl1, Cdc42, Spock2, ENSMUSG00000040904, Rps29, Rps24, B2m, Atp6v0c, Rap1a, R…	1619
GO:0002181	cytoplasmic translation	31	18	2.76	3.2e-12	3.2e-12	3dpi	BP	NonN_8	GO:0002181	Rpl11, Rpl17, Rpl18a, Rpl19, Rpl24, Rpl30, Rpl36, Rpl38, Rpl41, Rpl6, Rpl8, Rpl9, Rplp1, Rplp2, Rps2, Rps21, Rps29, Rpsa	144	Kcnb2, Rbfox3, Cdh18, Hs3st4, Grik1, Trhde, Dpp6, Sgcd, Pcdh10, Ntrk3, Slc8a3, Pcdh11x, Upp2, Meg3, Samd4, Cntnap2, Tmem132b, Mctp1, Jakmip2, Dner, Cacnb4, Kif26b, D430041D05Rik, Naaladl2, Sgcz, Brinp1, Xkr6, Atp8a2, Stxbp1, Dnajc6, Brinp3, Rps2, Diaph2, Igsf8, Rpsa, Plcl1, Ubc, Ifitm3, Epas1, Cobll1, Rps4x, Actb, Rpl3, Cfl1, Cdc42, Spock2, ENSMUSG00000040904, Rps29, Rps24, B2m, Atp6v0c, Rap1a, R…	1619
GO:0022613	ribonucleoprotein complex biogenesis	40	19	3.57	8.8e-11	0.70875	3dpi	BP	NonN_8	GO:0022613	Hsp90ab1, Rpl11, Rpl14, Rpl24, Rpl27, Rpl3, Rpl35, Rpl38, Rpl6, Rpl7, Rps14, Rps2, Rps21, Rps24, Rps27, Rps27rt, Rps5, Rps8, Rpsa	144	Kcnb2, Rbfox3, Cdh18, Hs3st4, Grik1, Trhde, Dpp6, Sgcd, Pcdh10, Ntrk3, Slc8a3, Pcdh11x, Upp2, Meg3, Samd4, Cntnap2, Tmem132b, Mctp1, Jakmip2, Dner, Cacnb4, Kif26b, D430041D05Rik, Naaladl2, Sgcz, Brinp1, Xkr6, Atp8a2, Stxbp1, Dnajc6, Brinp3, Rps2, Diaph2, Igsf8, Rpsa, Plcl1, Ubc, Ifitm3, Epas1, Cobll1, Rps4x, Actb, Rpl3, Cfl1, Cdc42, Spock2, ENSMUSG00000040904, Rps29, Rps24, B2m, Atp6v0c, Rap1a, R…	1619
GO:0042255	ribosome assembly	12	10	1.07	1.3e-09	1.00000	3dpi	BP	NonN_8	GO:0042255	Rpl11, Rpl24, Rpl3, Rpl38, Rpl6, Rps14, Rps2, Rps27, Rps5, Rpsa	144	Kcnb2, Rbfox3, Cdh18, Hs3st4, Grik1, Trhde, Dpp6, Sgcd, Pcdh10, Ntrk3, Slc8a3, Pcdh11x, Upp2, Meg3, Samd4, Cntnap2, Tmem132b, Mctp1, Jakmip2, Dner, Cacnb4, Kif26b, D430041D05Rik, Naaladl2, Sgcz, Brinp1, Xkr6, Atp8a2, Stxbp1, Dnajc6, Brinp3, Rps2, Diaph2, Igsf8, Rpsa, Plcl1, Ubc, Ifitm3, Epas1, Cobll1, Rps4x, Actb, Rpl3, Cfl1, Cdc42, Spock2, ENSMUSG00000040904, Rps29, Rps24, B2m, Atp6v0c, Rap1a, R…	1619
GO:0042274	ribosomal small subunit biogenesis	11	9	0.98	1.3e-08	0.00230	3dpi	BP	NonN_8	GO:0042274	Rpl38, Rps14, Rps2, Rps21, Rps24, Rps27, Rps5, Rps8, Rpsa	144	Kcnb2, Rbfox3, Cdh18, Hs3st4, Grik1, Trhde, Dpp6, Sgcd, Pcdh10, Ntrk3, Slc8a3, Pcdh11x, Upp2, Meg3, Samd4, Cntnap2, Tmem132b, Mctp1, Jakmip2, Dner, Cacnb4, Kif26b, D430041D05Rik, Naaladl2, Sgcz, Brinp1, Xkr6, Atp8a2, Stxbp1, Dnajc6, Brinp3, Rps2, Diaph2, Igsf8, Rpsa, Plcl1, Ubc, Ifitm3, Epas1, Cobll1, Rps4x, Actb, Rpl3, Cfl1, Cdc42, Spock2, ENSMUSG00000040904, Rps29, Rps24, B2m, Atp6v0c, Rap1a, R…	1619
GO:0006364	rRNA processing	17	11	1.52	1.5e-08	1.5e-08	3dpi	BP	NonN_8	GO:0006364	Rpl11, Rpl14, Rpl27, Rpl35, Rpl7, Rps14, Rps21, Rps24, Rps27, Rps27rt, Rps8	144	Kcnb2, Rbfox3, Cdh18, Hs3st4, Grik1, Trhde, Dpp6, Sgcd, Pcdh10, Ntrk3, Slc8a3, Pcdh11x, Upp2, Meg3, Samd4, Cntnap2, Tmem132b, Mctp1, Jakmip2, Dner, Cacnb4, Kif26b, D430041D05Rik, Naaladl2, Sgcz, Brinp1, Xkr6, Atp8a2, Stxbp1, Dnajc6, Brinp3, Rps2, Diaph2, Igsf8, Rpsa, Plcl1, Ubc, Ifitm3, Epas1, Cobll1, Rps4x, Actb, Rpl3, Cfl1, Cdc42, Spock2, ENSMUSG00000040904, Rps29, Rps24, B2m, Atp6v0c, Rap1a, R…	1619
GO:0016072	rRNA metabolic process	18	11	1.61	3.5e-08	1.00000	3dpi	BP	NonN_8	GO:0016072	Rpl11, Rpl14, Rpl27, Rpl35, Rpl7, Rps14, Rps21, Rps24, Rps27, Rps27rt, Rps8	144	Kcnb2, Rbfox3, Cdh18, Hs3st4, Grik1, Trhde, Dpp6, Sgcd, Pcdh10, Ntrk3, Slc8a3, Pcdh11x, Upp2, Meg3, Samd4, Cntnap2, Tmem132b, Mctp1, Jakmip2, Dner, Cacnb4, Kif26b, D430041D05Rik, Naaladl2, Sgcz, Brinp1, Xkr6, Atp8a2, Stxbp1, Dnajc6, Brinp3, Rps2, Diaph2, Igsf8, Rpsa, Plcl1, Ubc, Ifitm3, Epas1, Cobll1, Rps4x, Actb, Rpl3, Cfl1, Cdc42, Spock2, ENSMUSG00000040904, Rps29, Rps24, B2m, Atp6v0c, Rap1a, R…	1619
GO:0034470	ncRNA processing	19	11	1.69	7.8e-08	1.00000	3dpi	BP	NonN_8	GO:0034470	Rpl11, Rpl14, Rpl27, Rpl35, Rpl7, Rps14, Rps21, Rps24, Rps27, Rps27rt, Rps8	144	Kcnb2, Rbfox3, Cdh18, Hs3st4, Grik1, Trhde, Dpp6, Sgcd, Pcdh10, Ntrk3, Slc8a3, Pcdh11x, Upp2, Meg3, Samd4, Cntnap2, Tmem132b, Mctp1, Jakmip2, Dner, Cacnb4, Kif26b, D430041D05Rik, Naaladl2, Sgcz, Brinp1, Xkr6, Atp8a2, Stxbp1, Dnajc6, Brinp3, Rps2, Diaph2, Igsf8, Rpsa, Plcl1, Ubc, Ifitm3, Epas1, Cobll1, Rps4x, Actb, Rpl3, Cfl1, Cdc42, Spock2, ENSMUSG00000040904, Rps29, Rps24, B2m, Atp6v0c, Rap1a, R…	1619
GO:0042273	ribosomal large subunit biogenesis	10	8	0.89	1.3e-07	0.00235	3dpi	BP	NonN_8	GO:0042273	Rpl11, Rpl14, Rpl24, Rpl3, Rpl35, Rpl38, Rpl6, Rpl7	144	Kcnb2, Rbfox3, Cdh18, Hs3st4, Grik1, Trhde, Dpp6, Sgcd, Pcdh10, Ntrk3, Slc8a3, Pcdh11x, Upp2, Meg3, Samd4, Cntnap2, Tmem132b, Mctp1, Jakmip2, Dner, Cacnb4, Kif26b, D430041D05Rik, Naaladl2, Sgcz, Brinp1, Xkr6, Atp8a2, Stxbp1, Dnajc6, Brinp3, Rps2, Diaph2, Igsf8, Rpsa, Plcl1, Ubc, Ifitm3, Epas1, Cobll1, Rps4x, Actb, Rpl3, Cfl1, Cdc42, Spock2, ENSMUSG00000040904, Rps29, Rps24, B2m, Atp6v0c, Rap1a, R…	1619
GO:0034660	ncRNA metabolic process	22	11	1.96	5.7e-07	1.00000	3dpi	BP	NonN_8	GO:0034660	Rpl11, Rpl14, Rpl27, Rpl35, Rpl7, Rps14, Rps21, Rps24, Rps27, Rps27rt, Rps8	144	Kcnb2, Rbfox3, Cdh18, Hs3st4, Grik1, Trhde, Dpp6, Sgcd, Pcdh10, Ntrk3, Slc8a3, Pcdh11x, Upp2, Meg3, Samd4, Cntnap2, Tmem132b, Mctp1, Jakmip2, Dner, Cacnb4, Kif26b, D430041D05Rik, Naaladl2, Sgcz, Brinp1, Xkr6, Atp8a2, Stxbp1, Dnajc6, Brinp3, Rps2, Diaph2, Igsf8, Rpsa, Plcl1, Ubc, Ifitm3, Epas1, Cobll1, Rps4x, Actb, Rpl3, Cfl1, Cdc42, Spock2, ENSMUSG00000040904, Rps29, Rps24, B2m, Atp6v0c, Rap1a, R…	1619
GO:0022618	ribonucleoprotein complex assembly	24	11	2.14	1.7e-06	0.64890	3dpi	BP	NonN_8	GO:0022618	Hsp90ab1, Rpl11, Rpl24, Rpl3, Rpl38, Rpl6, Rps14, Rps2, Rps27, Rps5, Rpsa	144	Kcnb2, Rbfox3, Cdh18, Hs3st4, Grik1, Trhde, Dpp6, Sgcd, Pcdh10, Ntrk3, Slc8a3, Pcdh11x, Upp2, Meg3, Samd4, Cntnap2, Tmem132b, Mctp1, Jakmip2, Dner, Cacnb4, Kif26b, D430041D05Rik, Naaladl2, Sgcz, Brinp1, Xkr6, Atp8a2, Stxbp1, Dnajc6, Brinp3, Rps2, Diaph2, Igsf8, Rpsa, Plcl1, Ubc, Ifitm3, Epas1, Cobll1, Rps4x, Actb, Rpl3, Cfl1, Cdc42, Spock2, ENSMUSG00000040904, Rps29, Rps24, B2m, Atp6v0c, Rap1a, R…	1619
GO:0071826	ribonucleoprotein complex subunit organi...	24	11	2.14	1.7e-06	0.64890	3dpi	BP	NonN_8	GO:0071826	Hsp90ab1, Rpl11, Rpl24, Rpl3, Rpl38, Rpl6, Rps14, Rps2, Rps27, Rps5, Rpsa	144	Kcnb2, Rbfox3, Cdh18, Hs3st4, Grik1, Trhde, Dpp6, Sgcd, Pcdh10, Ntrk3, Slc8a3, Pcdh11x, Upp2, Meg3, Samd4, Cntnap2, Tmem132b, Mctp1, Jakmip2, Dner, Cacnb4, Kif26b, D430041D05Rik, Naaladl2, Sgcz, Brinp1, Xkr6, Atp8a2, Stxbp1, Dnajc6, Brinp3, Rps2, Diaph2, Igsf8, Rpsa, Plcl1, Ubc, Ifitm3, Epas1, Cobll1, Rps4x, Actb, Rpl3, Cfl1, Cdc42, Spock2, ENSMUSG00000040904, Rps29, Rps24, B2m, Atp6v0c, Rap1a, R…	1619
GO:1901564	organonitrogen compound metabolic proces...	576	77	51.36	2.2e-06	0.56650	3dpi	BP	NonN_8	GO:1901564	Actb, Aldoa, Atp5j, Atp5j2, B2m, Cacnb4, Calm1, Calm2, Cd81, Cdc42, Cfl1, Ckb, Cst3, Dner, Dpp6, Eif1, Epas1, Fau, Gpx4, Gstp1, Hint1, Hsp90ab1, Itm2b, Ndfip1, Ndufa7, Ndufc2, Ntrk3, Pfdn5, Plcl1, Ppia, Rap1a, Rpl11, Rpl13, Rpl14, Rpl17, Rpl18a, Rpl19, Rpl21, Rpl23, Rpl24, Rpl27a, Rpl28, Rpl3, Rpl30, Rpl35, Rpl36, Rpl37, Rpl37a, Rpl38, Rpl41, Rpl6, Rpl7, Rpl8, Rpl9, Rplp1, Rplp2, Rps11, Rps13, Rp…	144	Kcnb2, Rbfox3, Cdh18, Hs3st4, Grik1, Trhde, Dpp6, Sgcd, Pcdh10, Ntrk3, Slc8a3, Pcdh11x, Upp2, Meg3, Samd4, Cntnap2, Tmem132b, Mctp1, Jakmip2, Dner, Cacnb4, Kif26b, D430041D05Rik, Naaladl2, Sgcz, Brinp1, Xkr6, Atp8a2, Stxbp1, Dnajc6, Brinp3, Rps2, Diaph2, Igsf8, Rpsa, Plcl1, Ubc, Ifitm3, Epas1, Cobll1, Rps4x, Actb, Rpl3, Cfl1, Cdc42, Spock2, ENSMUSG00000040904, Rps29, Rps24, B2m, Atp6v0c, Rap1a, R…	1619
GO:0000028	ribosomal small subunit assembly	7	6	0.62	2.9e-06	2.9e-06	3dpi	BP	NonN_8	GO:0000028	Rpl38, Rps14, Rps2, Rps27, Rps5, Rpsa	144	Kcnb2, Rbfox3, Cdh18, Hs3st4, Grik1, Trhde, Dpp6, Sgcd, Pcdh10, Ntrk3, Slc8a3, Pcdh11x, Upp2, Meg3, Samd4, Cntnap2, Tmem132b, Mctp1, Jakmip2, Dner, Cacnb4, Kif26b, D430041D05Rik, Naaladl2, Sgcz, Brinp1, Xkr6, Atp8a2, Stxbp1, Dnajc6, Brinp3, Rps2, Diaph2, Igsf8, Rpsa, Plcl1, Ubc, Ifitm3, Epas1, Cobll1, Rps4x, Actb, Rpl3, Cfl1, Cdc42, Spock2, ENSMUSG00000040904, Rps29, Rps24, B2m, Atp6v0c, Rap1a, R…	1619
GO:0009058	biosynthetic process	485	67	43.25	6.3e-06	0.69789	3dpi	BP	NonN_8	GO:0009058	Aldoa, Atp5j, Atp5j2, Cd81, Cdc42, Chchd2, Ckb, Cst3, Dynll1, Eif1, Elob, Epas1, Fau, Gstp1, Hint1, Hsp90ab1, Igfbp7, Itm2b, Ndufa7, Ndufc2, Pde8b, Pfdn5, Pltp, Ppia, Ptgds, Ptma, Rap1a, Rpl11, Rpl13, Rpl14, Rpl17, Rpl18a, Rpl19, Rpl21, Rpl23, Rpl24, Rpl27a, Rpl28, Rpl3, Rpl30, Rpl35, Rpl36, Rpl37, Rpl37a, Rpl38, Rpl41, Rpl6, Rpl7, Rpl8, Rpl9, Rplp1, Rplp2, Rps11, Rps13, Rps14, Rps2, Rps20, Rps21…	144	Kcnb2, Rbfox3, Cdh18, Hs3st4, Grik1, Trhde, Dpp6, Sgcd, Pcdh10, Ntrk3, Slc8a3, Pcdh11x, Upp2, Meg3, Samd4, Cntnap2, Tmem132b, Mctp1, Jakmip2, Dner, Cacnb4, Kif26b, D430041D05Rik, Naaladl2, Sgcz, Brinp1, Xkr6, Atp8a2, Stxbp1, Dnajc6, Brinp3, Rps2, Diaph2, Igsf8, Rpsa, Plcl1, Ubc, Ifitm3, Epas1, Cobll1, Rps4x, Actb, Rpl3, Cfl1, Cdc42, Spock2, ENSMUSG00000040904, Rps29, Rps24, B2m, Atp6v0c, Rap1a, R…	1619
GO:0034641	cellular nitrogen compound metabolic pro...	499	68	44.49	8.6e-06	0.83183	3dpi	BP	NonN_8	GO:0034641	Aldoa, Atp5j, Atp5j2, Cacnb4, Cd81, Chchd2, Dynll1, Eif1, Elob, Epas1, Fau, Gpx4, Gstp1, Hint1, Hsp90ab1, Meg3, Ndfip1, Ndufa7, Ndufc2, Pfdn5, Ppia, Ptma, Rbfox3, Rpl11, Rpl13, Rpl14, Rpl17, Rpl18a, Rpl19, Rpl21, Rpl23, Rpl24, Rpl27, Rpl27a, Rpl28, Rpl3, Rpl30, Rpl35, Rpl36, Rpl37, Rpl37a, Rpl38, Rpl41, Rpl6, Rpl7, Rpl8, Rpl9, Rplp1, Rplp2, Rps11, Rps13, Rps14, Rps2, Rps20, Rps21, Rps24, Rps27, R…	144	Kcnb2, Rbfox3, Cdh18, Hs3st4, Grik1, Trhde, Dpp6, Sgcd, Pcdh10, Ntrk3, Slc8a3, Pcdh11x, Upp2, Meg3, Samd4, Cntnap2, Tmem132b, Mctp1, Jakmip2, Dner, Cacnb4, Kif26b, D430041D05Rik, Naaladl2, Sgcz, Brinp1, Xkr6, Atp8a2, Stxbp1, Dnajc6, Brinp3, Rps2, Diaph2, Igsf8, Rpsa, Plcl1, Ubc, Ifitm3, Epas1, Cobll1, Rps4x, Actb, Rpl3, Cfl1, Cdc42, Spock2, ENSMUSG00000040904, Rps29, Rps24, B2m, Atp6v0c, Rap1a, R…	1619
GO:0044271	cellular nitrogen compound biosynthetic ...	390	57	34.78	9.0e-06	0.94996	3dpi	BP	NonN_8	GO:0044271	Aldoa, Atp5j, Atp5j2, Cd81, Chchd2, Dynll1, Eif1, Elob, Epas1, Fau, Hint1, Hsp90ab1, Ndufa7, Ndufc2, Pfdn5, Ppia, Ptma, Rpl11, Rpl13, Rpl14, Rpl17, Rpl18a, Rpl19, Rpl21, Rpl23, Rpl24, Rpl27a, Rpl28, Rpl3, Rpl30, Rpl35, Rpl36, Rpl37, Rpl37a, Rpl38, Rpl41, Rpl6, Rpl7, Rpl8, Rpl9, Rplp1, Rplp2, Rps11, Rps13, Rps14, Rps2, Rps20, Rps21, Rps24, Rps27a, Rps29, Rps3, Rps4x, Rps5, Rps8, Rpsa, Samd4	144	Kcnb2, Rbfox3, Cdh18, Hs3st4, Grik1, Trhde, Dpp6, Sgcd, Pcdh10, Ntrk3, Slc8a3, Pcdh11x, Upp2, Meg3, Samd4, Cntnap2, Tmem132b, Mctp1, Jakmip2, Dner, Cacnb4, Kif26b, D430041D05Rik, Naaladl2, Sgcz, Brinp1, Xkr6, Atp8a2, Stxbp1, Dnajc6, Brinp3, Rps2, Diaph2, Igsf8, Rpsa, Plcl1, Ubc, Ifitm3, Epas1, Cobll1, Rps4x, Actb, Rpl3, Cfl1, Cdc42, Spock2, ENSMUSG00000040904, Rps29, Rps24, B2m, Atp6v0c, Rap1a, R…	1619
GO:0019538	protein metabolic process	510	69	45.48	9.1e-06	0.87869	3dpi	BP	NonN_8	GO:0019538	Actb, B2m, Calm1, Calm2, Cd81, Cdc42, Cfl1, Cst3, Dner, Dpp6, Eif1, Epas1, Fau, Gstp1, Hint1, Hsp90ab1, Itm2b, Ndfip1, Ndufa7, Ntrk3, Pfdn5, Plcl1, Ppia, Rap1a, Rpl11, Rpl13, Rpl14, Rpl17, Rpl18a, Rpl19, Rpl21, Rpl23, Rpl24, Rpl27a, Rpl28, Rpl3, Rpl30, Rpl35, Rpl36, Rpl37, Rpl37a, Rpl38, Rpl41, Rpl6, Rpl7, Rpl8, Rpl9, Rplp1, Rplp2, Rps11, Rps13, Rps14, Rps2, Rps20, Rps21, Rps24, Rps27a, Rps29, Rp…	144	Kcnb2, Rbfox3, Cdh18, Hs3st4, Grik1, Trhde, Dpp6, Sgcd, Pcdh10, Ntrk3, Slc8a3, Pcdh11x, Upp2, Meg3, Samd4, Cntnap2, Tmem132b, Mctp1, Jakmip2, Dner, Cacnb4, Kif26b, D430041D05Rik, Naaladl2, Sgcz, Brinp1, Xkr6, Atp8a2, Stxbp1, Dnajc6, Brinp3, Rps2, Diaph2, Igsf8, Rpsa, Plcl1, Ubc, Ifitm3, Epas1, Cobll1, Rps4x, Actb, Rpl3, Cfl1, Cdc42, Spock2, ENSMUSG00000040904, Rps29, Rps24, B2m, Atp6v0c, Rap1a, R…	1619
GO:0006119	oxidative phosphorylation	19	9	1.69	1.2e-05	0.03526	3dpi	BP	NonN_8	GO:0006119	Atp5j, Atp5j2, Chchd2, Cox4i1, Cox5a, Cox7a2, Ndufa7, Ndufc2, Uqcrq	144	Kcnb2, Rbfox3, Cdh18, Hs3st4, Grik1, Trhde, Dpp6, Sgcd, Pcdh10, Ntrk3, Slc8a3, Pcdh11x, Upp2, Meg3, Samd4, Cntnap2, Tmem132b, Mctp1, Jakmip2, Dner, Cacnb4, Kif26b, D430041D05Rik, Naaladl2, Sgcz, Brinp1, Xkr6, Atp8a2, Stxbp1, Dnajc6, Brinp3, Rps2, Diaph2, Igsf8, Rpsa, Plcl1, Ubc, Ifitm3, Epas1, Cobll1, Rps4x, Actb, Rpl3, Cfl1, Cdc42, Spock2, ENSMUSG00000040904, Rps29, Rps24, B2m, Atp6v0c, Rap1a, R…	1619
GO:1901576	organic substance biosynthetic process	477	65	42.53	1.7e-05	0.81294	3dpi	BP	NonN_8	GO:1901576	Aldoa, Atp5j, Atp5j2, Cd81, Cdc42, Chchd2, Ckb, Cst3, Eif1, Elob, Epas1, Fau, Gstp1, Hint1, Hsp90ab1, Igfbp7, Itm2b, Ndufa7, Ndufc2, Pde8b, Pfdn5, Pltp, Ppia, Ptgds, Ptma, Rpl11, Rpl13, Rpl14, Rpl17, Rpl18a, Rpl19, Rpl21, Rpl23, Rpl24, Rpl27a, Rpl28, Rpl3, Rpl30, Rpl35, Rpl36, Rpl37, Rpl37a, Rpl38, Rpl41, Rpl6, Rpl7, Rpl8, Rpl9, Rplp1, Rplp2, Rps11, Rps13, Rps14, Rps2, Rps20, Rps21, Rps24, Rps27a…	144	Kcnb2, Rbfox3, Cdh18, Hs3st4, Grik1, Trhde, Dpp6, Sgcd, Pcdh10, Ntrk3, Slc8a3, Pcdh11x, Upp2, Meg3, Samd4, Cntnap2, Tmem132b, Mctp1, Jakmip2, Dner, Cacnb4, Kif26b, D430041D05Rik, Naaladl2, Sgcz, Brinp1, Xkr6, Atp8a2, Stxbp1, Dnajc6, Brinp3, Rps2, Diaph2, Igsf8, Rpsa, Plcl1, Ubc, Ifitm3, Epas1, Cobll1, Rps4x, Actb, Rpl3, Cfl1, Cdc42, Spock2, ENSMUSG00000040904, Rps29, Rps24, B2m, Atp6v0c, Rap1a, R…	1619
GO:0009060	aerobic respiration	20	9	1.78	2.0e-05	0.04728	3dpi	BP	NonN_8	GO:0009060	Atp5j, Atp5j2, Chchd2, Cox4i1, Cox5a, Cox7a2, Ndufa7, Ndufc2, Uqcrq	144	Kcnb2, Rbfox3, Cdh18, Hs3st4, Grik1, Trhde, Dpp6, Sgcd, Pcdh10, Ntrk3, Slc8a3, Pcdh11x, Upp2, Meg3, Samd4, Cntnap2, Tmem132b, Mctp1, Jakmip2, Dner, Cacnb4, Kif26b, D430041D05Rik, Naaladl2, Sgcz, Brinp1, Xkr6, Atp8a2, Stxbp1, Dnajc6, Brinp3, Rps2, Diaph2, Igsf8, Rpsa, Plcl1, Ubc, Ifitm3, Epas1, Cobll1, Rps4x, Actb, Rpl3, Cfl1, Cdc42, Spock2, ENSMUSG00000040904, Rps29, Rps24, B2m, Atp6v0c, Rap1a, R…	1619
GO:0000027	ribosomal large subunit assembly	6	5	0.54	2.9e-05	2.9e-05	3dpi	BP	NonN_8	GO:0000027	Rpl11, Rpl24, Rpl3, Rpl38, Rpl6	144	Kcnb2, Rbfox3, Cdh18, Hs3st4, Grik1, Trhde, Dpp6, Sgcd, Pcdh10, Ntrk3, Slc8a3, Pcdh11x, Upp2, Meg3, Samd4, Cntnap2, Tmem132b, Mctp1, Jakmip2, Dner, Cacnb4, Kif26b, D430041D05Rik, Naaladl2, Sgcz, Brinp1, Xkr6, Atp8a2, Stxbp1, Dnajc6, Brinp3, Rps2, Diaph2, Igsf8, Rpsa, Plcl1, Ubc, Ifitm3, Epas1, Cobll1, Rps4x, Actb, Rpl3, Cfl1, Cdc42, Spock2, ENSMUSG00000040904, Rps29, Rps24, B2m, Atp6v0c, Rap1a, R…	1619
GO:0044249	cellular biosynthetic process	474	64	42.27	3.0e-05	0.86289	3dpi	BP	NonN_8	GO:0044249	Aldoa, Atp5j, Atp5j2, Cd81, Cdc42, Chchd2, Cst3, Dynll1, Eif1, Elob, Epas1, Fau, Gstp1, Hint1, Hsp90ab1, Itm2b, Ndufa7, Ndufc2, Pde8b, Pfdn5, Pltp, Ppia, Ptgds, Ptma, Rpl11, Rpl13, Rpl14, Rpl17, Rpl18a, Rpl19, Rpl21, Rpl23, Rpl24, Rpl27a, Rpl28, Rpl3, Rpl30, Rpl35, Rpl36, Rpl37, Rpl37a, Rpl38, Rpl41, Rpl6, Rpl7, Rpl8, Rpl9, Rplp1, Rplp2, Rps11, Rps13, Rps14, Rps2, Rps20, Rps21, Rps24, Rps27a, Rps…	144	Kcnb2, Rbfox3, Cdh18, Hs3st4, Grik1, Trhde, Dpp6, Sgcd, Pcdh10, Ntrk3, Slc8a3, Pcdh11x, Upp2, Meg3, Samd4, Cntnap2, Tmem132b, Mctp1, Jakmip2, Dner, Cacnb4, Kif26b, D430041D05Rik, Naaladl2, Sgcz, Brinp1, Xkr6, Atp8a2, Stxbp1, Dnajc6, Brinp3, Rps2, Diaph2, Igsf8, Rpsa, Plcl1, Ubc, Ifitm3, Epas1, Cobll1, Rps4x, Actb, Rpl3, Cfl1, Cdc42, Spock2, ENSMUSG00000040904, Rps29, Rps24, B2m, Atp6v0c, Rap1a, R…	1619
GO:0044267	cellular protein metabolic process	476	64	42.44	3.5e-05	0.97716	3dpi	BP	NonN_8	GO:0044267	Actb, Calm1, Calm2, Cd81, Cdc42, Cfl1, Cst3, Dner, Eif1, Epas1, Fau, Gstp1, Hint1, Hsp90ab1, Ndfip1, Ndufa7, Ntrk3, Plcl1, Ppia, Rap1a, Rpl11, Rpl13, Rpl14, Rpl17, Rpl18a, Rpl19, Rpl21, Rpl23, Rpl24, Rpl27a, Rpl28, Rpl3, Rpl30, Rpl35, Rpl36, Rpl37, Rpl37a, Rpl38, Rpl41, Rpl6, Rpl7, Rpl8, Rpl9, Rplp1, Rplp2, Rps11, Rps13, Rps14, Rps2, Rps20, Rps21, Rps24, Rps27a, Rps29, Rps3, Rps4x, Rps5, Rps8, Rp…	144	Kcnb2, Rbfox3, Cdh18, Hs3st4, Grik1, Trhde, Dpp6, Sgcd, Pcdh10, Ntrk3, Slc8a3, Pcdh11x, Upp2, Meg3, Samd4, Cntnap2, Tmem132b, Mctp1, Jakmip2, Dner, Cacnb4, Kif26b, D430041D05Rik, Naaladl2, Sgcz, Brinp1, Xkr6, Atp8a2, Stxbp1, Dnajc6, Brinp3, Rps2, Diaph2, Igsf8, Rpsa, Plcl1, Ubc, Ifitm3, Epas1, Cobll1, Rps4x, Actb, Rpl3, Cfl1, Cdc42, Spock2, ENSMUSG00000040904, Rps29, Rps24, B2m, Atp6v0c, Rap1a, R…	1619
GO:0009059	macromolecule biosynthetic process	399	56	35.58	4.4e-05	0.98113	3dpi	BP	NonN_8	GO:0009059	Cd81, Cdc42, Chchd2, Cst3, Eif1, Elob, Epas1, Fau, Gstp1, Hint1, Hsp90ab1, Itm2b, Ndufa7, Pfdn5, Ppia, Ptma, Rpl11, Rpl13, Rpl14, Rpl17, Rpl18a, Rpl19, Rpl21, Rpl23, Rpl24, Rpl27a, Rpl28, Rpl3, Rpl30, Rpl35, Rpl36, Rpl37, Rpl37a, Rpl38, Rpl41, Rpl6, Rpl7, Rpl8, Rpl9, Rplp1, Rplp2, Rps11, Rps13, Rps14, Rps2, Rps20, Rps21, Rps24, Rps27a, Rps29, Rps3, Rps4x, Rps5, Rps8, Rpsa, Samd4	144	Kcnb2, Rbfox3, Cdh18, Hs3st4, Grik1, Trhde, Dpp6, Sgcd, Pcdh10, Ntrk3, Slc8a3, Pcdh11x, Upp2, Meg3, Samd4, Cntnap2, Tmem132b, Mctp1, Jakmip2, Dner, Cacnb4, Kif26b, D430041D05Rik, Naaladl2, Sgcz, Brinp1, Xkr6, Atp8a2, Stxbp1, Dnajc6, Brinp3, Rps2, Diaph2, Igsf8, Rpsa, Plcl1, Ubc, Ifitm3, Epas1, Cobll1, Rps4x, Actb, Rpl3, Cfl1, Cdc42, Spock2, ENSMUSG00000040904, Rps29, Rps24, B2m, Atp6v0c, Rap1a, R…	1619
GO:0042773	ATP synthesis coupled electron transport	10	6	0.89	7.0e-05	1.00000	3dpi	BP	NonN_8	GO:0042773	Chchd2, Cox4i1, Cox5a, Ndufa7, Ndufc2, Uqcrq	144	Kcnb2, Rbfox3, Cdh18, Hs3st4, Grik1, Trhde, Dpp6, Sgcd, Pcdh10, Ntrk3, Slc8a3, Pcdh11x, Upp2, Meg3, Samd4, Cntnap2, Tmem132b, Mctp1, Jakmip2, Dner, Cacnb4, Kif26b, D430041D05Rik, Naaladl2, Sgcz, Brinp1, Xkr6, Atp8a2, Stxbp1, Dnajc6, Brinp3, Rps2, Diaph2, Igsf8, Rpsa, Plcl1, Ubc, Ifitm3, Epas1, Cobll1, Rps4x, Actb, Rpl3, Cfl1, Cdc42, Spock2, ENSMUSG00000040904, Rps29, Rps24, B2m, Atp6v0c, Rap1a, R…	1619
GO:0042775	mitochondrial ATP synthesis coupled elec...	10	6	0.89	7.0e-05	7.0e-05	3dpi	BP	NonN_8	GO:0042775	Chchd2, Cox4i1, Cox5a, Ndufa7, Ndufc2, Uqcrq	144	Kcnb2, Rbfox3, Cdh18, Hs3st4, Grik1, Trhde, Dpp6, Sgcd, Pcdh10, Ntrk3, Slc8a3, Pcdh11x, Upp2, Meg3, Samd4, Cntnap2, Tmem132b, Mctp1, Jakmip2, Dner, Cacnb4, Kif26b, D430041D05Rik, Naaladl2, Sgcz, Brinp1, Xkr6, Atp8a2, Stxbp1, Dnajc6, Brinp3, Rps2, Diaph2, Igsf8, Rpsa, Plcl1, Ubc, Ifitm3, Epas1, Cobll1, Rps4x, Actb, Rpl3, Cfl1, Cdc42, Spock2, ENSMUSG00000040904, Rps29, Rps24, B2m, Atp6v0c, Rap1a, R…	1619
GO:0034645	cellular macromolecule biosynthetic proc...	396	55	35.31	7.5e-05	0.98995	3dpi	BP	NonN_8	GO:0034645	Cd81, Cdc42, Chchd2, Cst3, Eif1, Elob, Epas1, Fau, Hint1, Hsp90ab1, Itm2b, Ndufa7, Pfdn5, Ppia, Ptma, Rpl11, Rpl13, Rpl14, Rpl17, Rpl18a, Rpl19, Rpl21, Rpl23, Rpl24, Rpl27a, Rpl28, Rpl3, Rpl30, Rpl35, Rpl36, Rpl37, Rpl37a, Rpl38, Rpl41, Rpl6, Rpl7, Rpl8, Rpl9, Rplp1, Rplp2, Rps11, Rps13, Rps14, Rps2, Rps20, Rps21, Rps24, Rps27a, Rps29, Rps3, Rps4x, Rps5, Rps8, Rpsa, Samd4	144	Kcnb2, Rbfox3, Cdh18, Hs3st4, Grik1, Trhde, Dpp6, Sgcd, Pcdh10, Ntrk3, Slc8a3, Pcdh11x, Upp2, Meg3, Samd4, Cntnap2, Tmem132b, Mctp1, Jakmip2, Dner, Cacnb4, Kif26b, D430041D05Rik, Naaladl2, Sgcz, Brinp1, Xkr6, Atp8a2, Stxbp1, Dnajc6, Brinp3, Rps2, Diaph2, Igsf8, Rpsa, Plcl1, Ubc, Ifitm3, Epas1, Cobll1, Rps4x, Actb, Rpl3, Cfl1, Cdc42, Spock2, ENSMUSG00000040904, Rps29, Rps24, B2m, Atp6v0c, Rap1a, R…	1619
GO:0045333	cellular respiration	23	9	2.05	7.6e-05	0.09336	3dpi	BP	NonN_8	GO:0045333	Atp5j, Atp5j2, Chchd2, Cox4i1, Cox5a, Cox7a2, Ndufa7, Ndufc2, Uqcrq	144	Kcnb2, Rbfox3, Cdh18, Hs3st4, Grik1, Trhde, Dpp6, Sgcd, Pcdh10, Ntrk3, Slc8a3, Pcdh11x, Upp2, Meg3, Samd4, Cntnap2, Tmem132b, Mctp1, Jakmip2, Dner, Cacnb4, Kif26b, D430041D05Rik, Naaladl2, Sgcz, Brinp1, Xkr6, Atp8a2, Stxbp1, Dnajc6, Brinp3, Rps2, Diaph2, Igsf8, Rpsa, Plcl1, Ubc, Ifitm3, Epas1, Cobll1, Rps4x, Actb, Rpl3, Cfl1, Cdc42, Spock2, ENSMUSG00000040904, Rps29, Rps24, B2m, Atp6v0c, Rap1a, R…	1619
GO:0019646	aerobic electron transport chain	8	5	0.71	0.00024	0.00024	3dpi	BP	NonN_8	GO:0019646	Cox4i1, Cox5a, Ndufa7, Ndufc2, Uqcrq	144	Kcnb2, Rbfox3, Cdh18, Hs3st4, Grik1, Trhde, Dpp6, Sgcd, Pcdh10, Ntrk3, Slc8a3, Pcdh11x, Upp2, Meg3, Samd4, Cntnap2, Tmem132b, Mctp1, Jakmip2, Dner, Cacnb4, Kif26b, D430041D05Rik, Naaladl2, Sgcz, Brinp1, Xkr6, Atp8a2, Stxbp1, Dnajc6, Brinp3, Rps2, Diaph2, Igsf8, Rpsa, Plcl1, Ubc, Ifitm3, Epas1, Cobll1, Rps4x, Actb, Rpl3, Cfl1, Cdc42, Spock2, ENSMUSG00000040904, Rps29, Rps24, B2m, Atp6v0c, Rap1a, R…	1619
GO:1901798	positive regulation of signal transducti...	8	5	0.71	0.00024	0.00024	3dpi	BP	NonN_8	GO:1901798	Rpl11, Rpl23, Rpl37, Rps20, Ubb	144	Kcnb2, Rbfox3, Cdh18, Hs3st4, Grik1, Trhde, Dpp6, Sgcd, Pcdh10, Ntrk3, Slc8a3, Pcdh11x, Upp2, Meg3, Samd4, Cntnap2, Tmem132b, Mctp1, Jakmip2, Dner, Cacnb4, Kif26b, D430041D05Rik, Naaladl2, Sgcz, Brinp1, Xkr6, Atp8a2, Stxbp1, Dnajc6, Brinp3, Rps2, Diaph2, Igsf8, Rpsa, Plcl1, Ubc, Ifitm3, Epas1, Cobll1, Rps4x, Actb, Rpl3, Cfl1, Cdc42, Spock2, ENSMUSG00000040904, Rps29, Rps24, B2m, Atp6v0c, Rap1a, R…	1619
GO:0022900	electron transport chain	12	6	1.07	0.00027	1.00000	3dpi	BP	NonN_8	GO:0022900	Chchd2, Cox4i1, Cox5a, Ndufa7, Ndufc2, Uqcrq	144	Kcnb2, Rbfox3, Cdh18, Hs3st4, Grik1, Trhde, Dpp6, Sgcd, Pcdh10, Ntrk3, Slc8a3, Pcdh11x, Upp2, Meg3, Samd4, Cntnap2, Tmem132b, Mctp1, Jakmip2, Dner, Cacnb4, Kif26b, D430041D05Rik, Naaladl2, Sgcz, Brinp1, Xkr6, Atp8a2, Stxbp1, Dnajc6, Brinp3, Rps2, Diaph2, Igsf8, Rpsa, Plcl1, Ubc, Ifitm3, Epas1, Cobll1, Rps4x, Actb, Rpl3, Cfl1, Cdc42, Spock2, ENSMUSG00000040904, Rps29, Rps24, B2m, Atp6v0c, Rap1a, R…	1619
GO:0022904	respiratory electron transport chain	12	6	1.07	0.00027	1.00000	3dpi	BP	NonN_8	GO:0022904	Chchd2, Cox4i1, Cox5a, Ndufa7, Ndufc2, Uqcrq	144	Kcnb2, Rbfox3, Cdh18, Hs3st4, Grik1, Trhde, Dpp6, Sgcd, Pcdh10, Ntrk3, Slc8a3, Pcdh11x, Upp2, Meg3, Samd4, Cntnap2, Tmem132b, Mctp1, Jakmip2, Dner, Cacnb4, Kif26b, D430041D05Rik, Naaladl2, Sgcz, Brinp1, Xkr6, Atp8a2, Stxbp1, Dnajc6, Brinp3, Rps2, Diaph2, Igsf8, Rpsa, Plcl1, Ubc, Ifitm3, Epas1, Cobll1, Rps4x, Actb, Rpl3, Cfl1, Cdc42, Spock2, ENSMUSG00000040904, Rps29, Rps24, B2m, Atp6v0c, Rap1a, R…	1619
GO:0046034	ATP metabolic process	39	11	3.48	0.00036	0.09595	3dpi	BP	NonN_8	GO:0046034	Aldoa, Atp1a2, Atp5j, Atp5j2, Chchd2, Cox4i1, Cox5a, Cox7a2, Ndufa7, Ndufc2, Uqcrq	144	Kcnb2, Rbfox3, Cdh18, Hs3st4, Grik1, Trhde, Dpp6, Sgcd, Pcdh10, Ntrk3, Slc8a3, Pcdh11x, Upp2, Meg3, Samd4, Cntnap2, Tmem132b, Mctp1, Jakmip2, Dner, Cacnb4, Kif26b, D430041D05Rik, Naaladl2, Sgcz, Brinp1, Xkr6, Atp8a2, Stxbp1, Dnajc6, Brinp3, Rps2, Diaph2, Igsf8, Rpsa, Plcl1, Ubc, Ifitm3, Epas1, Cobll1, Rps4x, Actb, Rpl3, Cfl1, Cdc42, Spock2, ENSMUSG00000040904, Rps29, Rps24, B2m, Atp6v0c, Rap1a, R…	1619
GO:0008152	metabolic process	906	99	80.79	0.00044	0.69697	3dpi	BP	NonN_8	GO:0008152	Actb, Aldoa, Atp1a2, Atp5j, Atp5j2, B2m, Bsg, Cacnb4, Calm1, Calm2, Cd81, Cdc42, Cfl1, Chchd2, Ckb, Cox4i1, Cox5a, Cox7a2, Cst3, Dner, Dpp6, Dynll1, Eif1, Elob, Epas1, Fau, Gpx4, Gstp1, H3f3b, Hint1, Hsp90ab1, Igfbp7, Itm2b, Meg3, Ndfip1, Ndufa4, Ndufa7, Ndufc2, Ntrk3, Pde8b, Pfdn5, Plcl1, Pltp, Ppia, Prdx1, Ptgds, Ptma, Rap1a, Rbfox3, Rpl11, Rpl13, Rpl14, Rpl17, Rpl18a, Rpl19, Rpl21, Rpl23, Rpl2…	144	Kcnb2, Rbfox3, Cdh18, Hs3st4, Grik1, Trhde, Dpp6, Sgcd, Pcdh10, Ntrk3, Slc8a3, Pcdh11x, Upp2, Meg3, Samd4, Cntnap2, Tmem132b, Mctp1, Jakmip2, Dner, Cacnb4, Kif26b, D430041D05Rik, Naaladl2, Sgcz, Brinp1, Xkr6, Atp8a2, Stxbp1, Dnajc6, Brinp3, Rps2, Diaph2, Igsf8, Rpsa, Plcl1, Ubc, Ifitm3, Epas1, Cobll1, Rps4x, Actb, Rpl3, Cfl1, Cdc42, Spock2, ENSMUSG00000040904, Rps29, Rps24, B2m, Atp6v0c, Rap1a, R…	1619
GO:0010467	gene expression	493	62	43.96	0.00048	0.99234	3dpi	BP	NonN_8	GO:0010467	B2m, Bsg, Cd81, Chchd2, Eif1, Elob, Epas1, Fau, Gstp1, H3f3b, Hint1, Hsp90ab1, Ndfip1, Ndufa7, Ntrk3, Pfdn5, Ppia, Ptma, Rbfox3, Rpl11, Rpl13, Rpl14, Rpl17, Rpl18a, Rpl19, Rpl21, Rpl23, Rpl24, Rpl27, Rpl27a, Rpl28, Rpl3, Rpl30, Rpl35, Rpl36, Rpl37, Rpl37a, Rpl38, Rpl41, Rpl6, Rpl7, Rpl8, Rpl9, Rplp1, Rplp2, Rps11, Rps13, Rps14, Rps2, Rps20, Rps21, Rps24, Rps27, Rps27a, Rps27rt, Rps29, Rps3, Rps4x…	144	Kcnb2, Rbfox3, Cdh18, Hs3st4, Grik1, Trhde, Dpp6, Sgcd, Pcdh10, Ntrk3, Slc8a3, Pcdh11x, Upp2, Meg3, Samd4, Cntnap2, Tmem132b, Mctp1, Jakmip2, Dner, Cacnb4, Kif26b, D430041D05Rik, Naaladl2, Sgcz, Brinp1, Xkr6, Atp8a2, Stxbp1, Dnajc6, Brinp3, Rps2, Diaph2, Igsf8, Rpsa, Plcl1, Ubc, Ifitm3, Epas1, Cobll1, Rps4x, Actb, Rpl3, Cfl1, Cdc42, Spock2, ENSMUSG00000040904, Rps29, Rps24, B2m, Atp6v0c, Rap1a, R…	1619
GO:1901796	regulation of signal transduction by p53...	10	5	0.89	0.00092	1.00000	3dpi	BP	NonN_8	GO:1901796	Rpl11, Rpl23, Rpl37, Rps20, Ubb	144	Kcnb2, Rbfox3, Cdh18, Hs3st4, Grik1, Trhde, Dpp6, Sgcd, Pcdh10, Ntrk3, Slc8a3, Pcdh11x, Upp2, Meg3, Samd4, Cntnap2, Tmem132b, Mctp1, Jakmip2, Dner, Cacnb4, Kif26b, D430041D05Rik, Naaladl2, Sgcz, Brinp1, Xkr6, Atp8a2, Stxbp1, Dnajc6, Brinp3, Rps2, Diaph2, Igsf8, Rpsa, Plcl1, Ubc, Ifitm3, Epas1, Cobll1, Rps4x, Actb, Rpl3, Cfl1, Cdc42, Spock2, ENSMUSG00000040904, Rps29, Rps24, B2m, Atp6v0c, Rap1a, R…	1619
GO:0044237	cellular metabolic process	852	93	75.97	0.00117	0.88463	3dpi	BP	NonN_8	GO:0044237	Actb, Aldoa, Atp5j, Atp5j2, Cacnb4, Calm1, Calm2, Cd81, Cdc42, Cfl1, Chchd2, Ckb, Cox4i1, Cox5a, Cox7a2, Cst3, Dner, Dynll1, Eif1, Elob, Epas1, Fau, Gpx4, Gstp1, Hint1, Hsp90ab1, Itm2b, Meg3, Ndfip1, Ndufa4, Ndufa7, Ndufc2, Ntrk3, Pde8b, Pfdn5, Plcl1, Pltp, Ppia, Prdx1, Ptgds, Ptma, Rap1a, Rbfox3, Rpl11, Rpl13, Rpl14, Rpl17, Rpl18a, Rpl19, Rpl21, Rpl23, Rpl24, Rpl27, Rpl27a, Rpl28, Rpl3, Rpl30, R…	144	Kcnb2, Rbfox3, Cdh18, Hs3st4, Grik1, Trhde, Dpp6, Sgcd, Pcdh10, Ntrk3, Slc8a3, Pcdh11x, Upp2, Meg3, Samd4, Cntnap2, Tmem132b, Mctp1, Jakmip2, Dner, Cacnb4, Kif26b, D430041D05Rik, Naaladl2, Sgcz, Brinp1, Xkr6, Atp8a2, Stxbp1, Dnajc6, Brinp3, Rps2, Diaph2, Igsf8, Rpsa, Plcl1, Ubc, Ifitm3, Epas1, Cobll1, Rps4x, Actb, Rpl3, Cfl1, Cdc42, Spock2, ENSMUSG00000040904, Rps29, Rps24, B2m, Atp6v0c, Rap1a, R…	1619
GO:0006807	nitrogen compound metabolic process	773	86	68.93	0.00132	0.88502	3dpi	BP	NonN_8	GO:0006807	Actb, Aldoa, Atp5j, Atp5j2, B2m, Cacnb4, Calm1, Calm2, Cd81, Cdc42, Cfl1, Chchd2, Ckb, Cst3, Dner, Dpp6, Dynll1, Eif1, Elob, Epas1, Fau, Gpx4, Gstp1, Hint1, Hsp90ab1, Itm2b, Meg3, Ndfip1, Ndufa7, Ndufc2, Ntrk3, Pfdn5, Plcl1, Ppia, Ptma, Rap1a, Rbfox3, Rpl11, Rpl13, Rpl14, Rpl17, Rpl18a, Rpl19, Rpl21, Rpl23, Rpl24, Rpl27, Rpl27a, Rpl28, Rpl3, Rpl30, Rpl35, Rpl36, Rpl37, Rpl37a, Rpl38, Rpl41, Rpl6,…	144	Kcnb2, Rbfox3, Cdh18, Hs3st4, Grik1, Trhde, Dpp6, Sgcd, Pcdh10, Ntrk3, Slc8a3, Pcdh11x, Upp2, Meg3, Samd4, Cntnap2, Tmem132b, Mctp1, Jakmip2, Dner, Cacnb4, Kif26b, D430041D05Rik, Naaladl2, Sgcz, Brinp1, Xkr6, Atp8a2, Stxbp1, Dnajc6, Brinp3, Rps2, Diaph2, Igsf8, Rpsa, Plcl1, Ubc, Ifitm3, Epas1, Cobll1, Rps4x, Actb, Rpl3, Cfl1, Cdc42, Spock2, ENSMUSG00000040904, Rps29, Rps24, B2m, Atp6v0c, Rap1a, R…	1619
GO:0140694	non-membrane-bounded organelle assembly	45	11	4.01	0.00136	0.94496	3dpi	BP	NonN_8	GO:0140694	Rpl11, Rpl24, Rpl3, Rpl38, Rpl6, Rps14, Rps2, Rps27, Rps3, Rps5, Rpsa	144	Kcnb2, Rbfox3, Cdh18, Hs3st4, Grik1, Trhde, Dpp6, Sgcd, Pcdh10, Ntrk3, Slc8a3, Pcdh11x, Upp2, Meg3, Samd4, Cntnap2, Tmem132b, Mctp1, Jakmip2, Dner, Cacnb4, Kif26b, D430041D05Rik, Naaladl2, Sgcz, Brinp1, Xkr6, Atp8a2, Stxbp1, Dnajc6, Brinp3, Rps2, Diaph2, Igsf8, Rpsa, Plcl1, Ubc, Ifitm3, Epas1, Cobll1, Rps4x, Actb, Rpl3, Cfl1, Cdc42, Spock2, ENSMUSG00000040904, Rps29, Rps24, B2m, Atp6v0c, Rap1a, R…	1619
GO:0034622	cellular protein-containing complex asse...	122	21	10.88	0.00166	0.30334	3dpi	BP	NonN_8	GO:0034622	B2m, Cfl1, Cox7a2, Diaph2, Gpx4, H3f3b, Hsp90ab1, Ndufc2, Rpl11, Rpl24, Rpl3, Rpl38, Rpl6, Rps14, Rps2, Rps27, Rps3, Rps5, Rpsa, Stxbp1, Tmsb10	144	Kcnb2, Rbfox3, Cdh18, Hs3st4, Grik1, Trhde, Dpp6, Sgcd, Pcdh10, Ntrk3, Slc8a3, Pcdh11x, Upp2, Meg3, Samd4, Cntnap2, Tmem132b, Mctp1, Jakmip2, Dner, Cacnb4, Kif26b, D430041D05Rik, Naaladl2, Sgcz, Brinp1, Xkr6, Atp8a2, Stxbp1, Dnajc6, Brinp3, Rps2, Diaph2, Igsf8, Rpsa, Plcl1, Ubc, Ifitm3, Epas1, Cobll1, Rps4x, Actb, Rpl3, Cfl1, Cdc42, Spock2, ENSMUSG00000040904, Rps29, Rps24, B2m, Atp6v0c, Rap1a, R…	1619
GO:0072331	signal transduction by p53 class mediato...	16	6	1.43	0.00170	0.51518	3dpi	BP	NonN_8	GO:0072331	Hint1, Rpl11, Rpl23, Rpl37, Rps20, Ubb	144	Kcnb2, Rbfox3, Cdh18, Hs3st4, Grik1, Trhde, Dpp6, Sgcd, Pcdh10, Ntrk3, Slc8a3, Pcdh11x, Upp2, Meg3, Samd4, Cntnap2, Tmem132b, Mctp1, Jakmip2, Dner, Cacnb4, Kif26b, D430041D05Rik, Naaladl2, Sgcz, Brinp1, Xkr6, Atp8a2, Stxbp1, Dnajc6, Brinp3, Rps2, Diaph2, Igsf8, Rpsa, Plcl1, Ubc, Ifitm3, Epas1, Cobll1, Rps4x, Actb, Rpl3, Cfl1, Cdc42, Spock2, ENSMUSG00000040904, Rps29, Rps24, B2m, Atp6v0c, Rap1a, R…	1619
GO:0006091	generation of precursor metabolites and ...	47	11	4.19	0.00199	0.20578	3dpi	BP	NonN_8	GO:0006091	Aldoa, Atp5j, Atp5j2, Chchd2, Cox4i1, Cox5a, Cox7a2, Ndufa4, Ndufa7, Ndufc2, Uqcrq	144	Kcnb2, Rbfox3, Cdh18, Hs3st4, Grik1, Trhde, Dpp6, Sgcd, Pcdh10, Ntrk3, Slc8a3, Pcdh11x, Upp2, Meg3, Samd4, Cntnap2, Tmem132b, Mctp1, Jakmip2, Dner, Cacnb4, Kif26b, D430041D05Rik, Naaladl2, Sgcz, Brinp1, Xkr6, Atp8a2, Stxbp1, Dnajc6, Brinp3, Rps2, Diaph2, Igsf8, Rpsa, Plcl1, Ubc, Ifitm3, Epas1, Cobll1, Rps4x, Actb, Rpl3, Cfl1, Cdc42, Spock2, ENSMUSG00000040904, Rps29, Rps24, B2m, Atp6v0c, Rap1a, R…	1619
GO:1903320	regulation of protein modification by sm...	35	9	3.12	0.00258	0.30127	3dpi	BP	NonN_8	GO:1903320	Epas1, Hsp90ab1, Ndfip1, Ppia, Rpl11, Rpl23, Rps2, Rps3, Ubb	144	Kcnb2, Rbfox3, Cdh18, Hs3st4, Grik1, Trhde, Dpp6, Sgcd, Pcdh10, Ntrk3, Slc8a3, Pcdh11x, Upp2, Meg3, Samd4, Cntnap2, Tmem132b, Mctp1, Jakmip2, Dner, Cacnb4, Kif26b, D430041D05Rik, Naaladl2, Sgcz, Brinp1, Xkr6, Atp8a2, Stxbp1, Dnajc6, Brinp3, Rps2, Diaph2, Igsf8, Rpsa, Plcl1, Ubc, Ifitm3, Epas1, Cobll1, Rps4x, Actb, Rpl3, Cfl1, Cdc42, Spock2, ENSMUSG00000040904, Rps29, Rps24, B2m, Atp6v0c, Rap1a, R…	1619
GO:0044238	primary metabolic process	812	88	72.4	0.00297	0.89821	3dpi	BP	NonN_8	GO:0044238	Actb, Aldoa, Atp5j, Atp5j2, B2m, Cacnb4, Calm1, Calm2, Cd81, Cdc42, Cfl1, Chchd2, Cst3, Dner, Dpp6, Eif1, Elob, Epas1, Fau, Gpx4, Gstp1, Hint1, Hsp90ab1, Igfbp7, Itm2b, Meg3, Ndfip1, Ndufa7, Ndufc2, Ntrk3, Pde8b, Pfdn5, Plcl1, Pltp, Ppia, Ptgds, Ptma, Rap1a, Rbfox3, Rpl11, Rpl13, Rpl14, Rpl17, Rpl18a, Rpl19, Rpl21, Rpl23, Rpl24, Rpl27, Rpl27a, Rpl28, Rpl3, Rpl30, Rpl35, Rpl36, Rpl37, Rpl37a, Rpl3…	144	Kcnb2, Rbfox3, Cdh18, Hs3st4, Grik1, Trhde, Dpp6, Sgcd, Pcdh10, Ntrk3, Slc8a3, Pcdh11x, Upp2, Meg3, Samd4, Cntnap2, Tmem132b, Mctp1, Jakmip2, Dner, Cacnb4, Kif26b, D430041D05Rik, Naaladl2, Sgcz, Brinp1, Xkr6, Atp8a2, Stxbp1, Dnajc6, Brinp3, Rps2, Diaph2, Igsf8, Rpsa, Plcl1, Ubc, Ifitm3, Epas1, Cobll1, Rps4x, Actb, Rpl3, Cfl1, Cdc42, Spock2, ENSMUSG00000040904, Rps29, Rps24, B2m, Atp6v0c, Rap1a, R…	1619
GO:0015980	energy derivation by oxidation of organi...	36	9	3.21	0.00319	0.38834	3dpi	BP	NonN_8	GO:0015980	Atp5j, Atp5j2, Chchd2, Cox4i1, Cox5a, Cox7a2, Ndufa7, Ndufc2, Uqcrq	144	Kcnb2, Rbfox3, Cdh18, Hs3st4, Grik1, Trhde, Dpp6, Sgcd, Pcdh10, Ntrk3, Slc8a3, Pcdh11x, Upp2, Meg3, Samd4, Cntnap2, Tmem132b, Mctp1, Jakmip2, Dner, Cacnb4, Kif26b, D430041D05Rik, Naaladl2, Sgcz, Brinp1, Xkr6, Atp8a2, Stxbp1, Dnajc6, Brinp3, Rps2, Diaph2, Igsf8, Rpsa, Plcl1, Ubc, Ifitm3, Epas1, Cobll1, Rps4x, Actb, Rpl3, Cfl1, Cdc42, Spock2, ENSMUSG00000040904, Rps29, Rps24, B2m, Atp6v0c, Rap1a, R…	1619
GO:0031396	regulation of protein ubiquitination	31	8	2.76	0.00438	0.00438	3dpi	BP	NonN_8	GO:0031396	Hsp90ab1, Ndfip1, Ppia, Rpl11, Rpl23, Rps2, Rps3, Ubb	144	Kcnb2, Rbfox3, Cdh18, Hs3st4, Grik1, Trhde, Dpp6, Sgcd, Pcdh10, Ntrk3, Slc8a3, Pcdh11x, Upp2, Meg3, Samd4, Cntnap2, Tmem132b, Mctp1, Jakmip2, Dner, Cacnb4, Kif26b, D430041D05Rik, Naaladl2, Sgcz, Brinp1, Xkr6, Atp8a2, Stxbp1, Dnajc6, Brinp3, Rps2, Diaph2, Igsf8, Rpsa, Plcl1, Ubc, Ifitm3, Epas1, Cobll1, Rps4x, Actb, Rpl3, Cfl1, Cdc42, Spock2, ENSMUSG00000040904, Rps29, Rps24, B2m, Atp6v0c, Rap1a, R…	1619
GO:0010996	response to auditory stimulus	9	4	0.8	0.00535	0.00535	3dpi	BP	NonN_8	GO:0010996	Atp1a2, Atp8a2, Cntnap2, Ptn	144	Kcnb2, Rbfox3, Cdh18, Hs3st4, Grik1, Trhde, Dpp6, Sgcd, Pcdh10, Ntrk3, Slc8a3, Pcdh11x, Upp2, Meg3, Samd4, Cntnap2, Tmem132b, Mctp1, Jakmip2, Dner, Cacnb4, Kif26b, D430041D05Rik, Naaladl2, Sgcz, Brinp1, Xkr6, Atp8a2, Stxbp1, Dnajc6, Brinp3, Rps2, Diaph2, Igsf8, Rpsa, Plcl1, Ubc, Ifitm3, Epas1, Cobll1, Rps4x, Actb, Rpl3, Cfl1, Cdc42, Spock2, ENSMUSG00000040904, Rps29, Rps24, B2m, Atp6v0c, Rap1a, R…	1619
GO:0035307	positive regulation of protein dephospho...	9	4	0.8	0.00535	0.30687	3dpi	BP	NonN_8	GO:0035307	Calm1, Calm2, Hsp90ab1, Ppia	144	Kcnb2, Rbfox3, Cdh18, Hs3st4, Grik1, Trhde, Dpp6, Sgcd, Pcdh10, Ntrk3, Slc8a3, Pcdh11x, Upp2, Meg3, Samd4, Cntnap2, Tmem132b, Mctp1, Jakmip2, Dner, Cacnb4, Kif26b, D430041D05Rik, Naaladl2, Sgcz, Brinp1, Xkr6, Atp8a2, Stxbp1, Dnajc6, Brinp3, Rps2, Diaph2, Igsf8, Rpsa, Plcl1, Ubc, Ifitm3, Epas1, Cobll1, Rps4x, Actb, Rpl3, Cfl1, Cdc42, Spock2, ENSMUSG00000040904, Rps29, Rps24, B2m, Atp6v0c, Rap1a, R…	1619
GO:0043933	protein-containing complex subunit organ...	188	27	16.76	0.00574	0.28778	3dpi	BP	NonN_8	GO:0043933	B2m, Cdc42, Cfl1, Cox7a2, Diaph2, Dnajc6, Gpx4, H3f3b, Hsp90ab1, Kcnb2, Ndufc2, Pltp, Ptma, Rpl11, Rpl23, Rpl24, Rpl3, Rpl38, Rpl6, Rps14, Rps2, Rps27, Rps3, Rps5, Rpsa, Stxbp1, Tmsb10	144	Kcnb2, Rbfox3, Cdh18, Hs3st4, Grik1, Trhde, Dpp6, Sgcd, Pcdh10, Ntrk3, Slc8a3, Pcdh11x, Upp2, Meg3, Samd4, Cntnap2, Tmem132b, Mctp1, Jakmip2, Dner, Cacnb4, Kif26b, D430041D05Rik, Naaladl2, Sgcz, Brinp1, Xkr6, Atp8a2, Stxbp1, Dnajc6, Brinp3, Rps2, Diaph2, Igsf8, Rpsa, Plcl1, Ubc, Ifitm3, Epas1, Cobll1, Rps4x, Actb, Rpl3, Cfl1, Cdc42, Spock2, ENSMUSG00000040904, Rps29, Rps24, B2m, Atp6v0c, Rap1a, R…	1619
GO:0032516	positive regulation of phosphoprotein ph...	5	3	0.45	0.00607	0.00607	3dpi	BP	NonN_8	GO:0032516	Calm1, Calm2, Hsp90ab1	144	Kcnb2, Rbfox3, Cdh18, Hs3st4, Grik1, Trhde, Dpp6, Sgcd, Pcdh10, Ntrk3, Slc8a3, Pcdh11x, Upp2, Meg3, Samd4, Cntnap2, Tmem132b, Mctp1, Jakmip2, Dner, Cacnb4, Kif26b, D430041D05Rik, Naaladl2, Sgcz, Brinp1, Xkr6, Atp8a2, Stxbp1, Dnajc6, Brinp3, Rps2, Diaph2, Igsf8, Rpsa, Plcl1, Ubc, Ifitm3, Epas1, Cobll1, Rps4x, Actb, Rpl3, Cfl1, Cdc42, Spock2, ENSMUSG00000040904, Rps29, Rps24, B2m, Atp6v0c, Rap1a, R…	1619
GO:0006396	RNA processing	70	13	6.24	0.00699	0.94388	3dpi	BP	NonN_8	GO:0006396	Rbfox3, Rpl11, Rpl14, Rpl27, Rpl35, Rpl7, Rps13, Rps14, Rps21, Rps24, Rps27, Rps27rt, Rps8	144	Kcnb2, Rbfox3, Cdh18, Hs3st4, Grik1, Trhde, Dpp6, Sgcd, Pcdh10, Ntrk3, Slc8a3, Pcdh11x, Upp2, Meg3, Samd4, Cntnap2, Tmem132b, Mctp1, Jakmip2, Dner, Cacnb4, Kif26b, D430041D05Rik, Naaladl2, Sgcz, Brinp1, Xkr6, Atp8a2, Stxbp1, Dnajc6, Brinp3, Rps2, Diaph2, Igsf8, Rpsa, Plcl1, Ubc, Ifitm3, Epas1, Cobll1, Rps4x, Actb, Rpl3, Cfl1, Cdc42, Spock2, ENSMUSG00000040904, Rps29, Rps24, B2m, Atp6v0c, Rap1a, R…	1619
GO:0035306	positive regulation of dephosphorylation	10	4	0.89	0.00830	0.36767	3dpi	BP	NonN_8	GO:0035306	Calm1, Calm2, Hsp90ab1, Ppia	144	Kcnb2, Rbfox3, Cdh18, Hs3st4, Grik1, Trhde, Dpp6, Sgcd, Pcdh10, Ntrk3, Slc8a3, Pcdh11x, Upp2, Meg3, Samd4, Cntnap2, Tmem132b, Mctp1, Jakmip2, Dner, Cacnb4, Kif26b, D430041D05Rik, Naaladl2, Sgcz, Brinp1, Xkr6, Atp8a2, Stxbp1, Dnajc6, Brinp3, Rps2, Diaph2, Igsf8, Rpsa, Plcl1, Ubc, Ifitm3, Epas1, Cobll1, Rps4x, Actb, Rpl3, Cfl1, Cdc42, Spock2, ENSMUSG00000040904, Rps29, Rps24, B2m, Atp6v0c, Rap1a, R…	1619
GO:0055072	iron ion homeostasis	10	4	0.89	0.00830	0.00830	3dpi	BP	NonN_8	GO:0055072	B2m, Epas1, Ftl1, Ndfip1	144	Kcnb2, Rbfox3, Cdh18, Hs3st4, Grik1, Trhde, Dpp6, Sgcd, Pcdh10, Ntrk3, Slc8a3, Pcdh11x, Upp2, Meg3, Samd4, Cntnap2, Tmem132b, Mctp1, Jakmip2, Dner, Cacnb4, Kif26b, D430041D05Rik, Naaladl2, Sgcz, Brinp1, Xkr6, Atp8a2, Stxbp1, Dnajc6, Brinp3, Rps2, Diaph2, Igsf8, Rpsa, Plcl1, Ubc, Ifitm3, Epas1, Cobll1, Rps4x, Actb, Rpl3, Cfl1, Cdc42, Spock2, ENSMUSG00000040904, Rps29, Rps24, B2m, Atp6v0c, Rap1a, R…	1619
GO:0006952	defense response	105	17	9.36	0.00901	0.00901	3dpi	BP	NonN_8	GO:0006952	Atp1a2, B2m, Brinp1, Cd81, Cdc42, Cntnap2, Fau, Gpx4, Gstp1, Ifitm3, Ndfip1, Ndufc2, Pde8b, Prdx1, Ptn, Rpl30, Stxbp1	144	Kcnb2, Rbfox3, Cdh18, Hs3st4, Grik1, Trhde, Dpp6, Sgcd, Pcdh10, Ntrk3, Slc8a3, Pcdh11x, Upp2, Meg3, Samd4, Cntnap2, Tmem132b, Mctp1, Jakmip2, Dner, Cacnb4, Kif26b, D430041D05Rik, Naaladl2, Sgcz, Brinp1, Xkr6, Atp8a2, Stxbp1, Dnajc6, Brinp3, Rps2, Diaph2, Igsf8, Rpsa, Plcl1, Ubc, Ifitm3, Epas1, Cobll1, Rps4x, Actb, Rpl3, Cfl1, Cdc42, Spock2, ENSMUSG00000040904, Rps29, Rps24, B2m, Atp6v0c, Rap1a, R…	1619
GO:0071704	organic substance metabolic process	872	91	77.75	0.00942	0.91995	3dpi	BP	NonN_8	GO:0071704	Actb, Aldoa, Atp5j, Atp5j2, B2m, Bsg, Cacnb4, Calm1, Calm2, Cd81, Cdc42, Cfl1, Chchd2, Ckb, Cst3, Dner, Dpp6, Eif1, Elob, Epas1, Fau, Gpx4, Gstp1, H3f3b, Hint1, Hsp90ab1, Igfbp7, Itm2b, Meg3, Ndfip1, Ndufa7, Ndufc2, Ntrk3, Pde8b, Pfdn5, Plcl1, Pltp, Ppia, Ptgds, Ptma, Rap1a, Rbfox3, Rpl11, Rpl13, Rpl14, Rpl17, Rpl18a, Rpl19, Rpl21, Rpl23, Rpl24, Rpl27, Rpl27a, Rpl28, Rpl3, Rpl30, Rpl35, Rpl36, Rp…	144	Kcnb2, Rbfox3, Cdh18, Hs3st4, Grik1, Trhde, Dpp6, Sgcd, Pcdh10, Ntrk3, Slc8a3, Pcdh11x, Upp2, Meg3, Samd4, Cntnap2, Tmem132b, Mctp1, Jakmip2, Dner, Cacnb4, Kif26b, D430041D05Rik, Naaladl2, Sgcz, Brinp1, Xkr6, Atp8a2, Stxbp1, Dnajc6, Brinp3, Rps2, Diaph2, Igsf8, Rpsa, Plcl1, Ubc, Ifitm3, Epas1, Cobll1, Rps4x, Actb, Rpl3, Cfl1, Cdc42, Spock2, ENSMUSG00000040904, Rps29, Rps24, B2m, Atp6v0c, Rap1a, R…	1619
GO:0034101	erythrocyte homeostasis	16	5	1.43	0.01021	0.01021	3dpi	BP	NonN_8	GO:0034101	B2m, Epas1, Prdx1, Rps14, Rps24	144	Kcnb2, Rbfox3, Cdh18, Hs3st4, Grik1, Trhde, Dpp6, Sgcd, Pcdh10, Ntrk3, Slc8a3, Pcdh11x, Upp2, Meg3, Samd4, Cntnap2, Tmem132b, Mctp1, Jakmip2, Dner, Cacnb4, Kif26b, D430041D05Rik, Naaladl2, Sgcz, Brinp1, Xkr6, Atp8a2, Stxbp1, Dnajc6, Brinp3, Rps2, Diaph2, Igsf8, Rpsa, Plcl1, Ubc, Ifitm3, Epas1, Cobll1, Rps4x, Actb, Rpl3, Cfl1, Cdc42, Spock2, ENSMUSG00000040904, Rps29, Rps24, B2m, Atp6v0c, Rap1a, R…	1619
GO:0055076	transition metal ion homeostasis	16	5	1.43	0.01021	0.42174	3dpi	BP	NonN_8	GO:0055076	B2m, Epas1, Ftl1, Mt1, Ndfip1	144	Kcnb2, Rbfox3, Cdh18, Hs3st4, Grik1, Trhde, Dpp6, Sgcd, Pcdh10, Ntrk3, Slc8a3, Pcdh11x, Upp2, Meg3, Samd4, Cntnap2, Tmem132b, Mctp1, Jakmip2, Dner, Cacnb4, Kif26b, D430041D05Rik, Naaladl2, Sgcz, Brinp1, Xkr6, Atp8a2, Stxbp1, Dnajc6, Brinp3, Rps2, Diaph2, Igsf8, Rpsa, Plcl1, Ubc, Ifitm3, Epas1, Cobll1, Rps4x, Actb, Rpl3, Cfl1, Cdc42, Spock2, ENSMUSG00000040904, Rps29, Rps24, B2m, Atp6v0c, Rap1a, R…	1619
GO:1902600	proton transmembrane transport	16	5	1.43	0.01021	0.01021	3dpi	BP	NonN_8	GO:1902600	Atp1a2, Atp5j, Atp5j2, Atp6v0c, Ndufa4	144	Kcnb2, Rbfox3, Cdh18, Hs3st4, Grik1, Trhde, Dpp6, Sgcd, Pcdh10, Ntrk3, Slc8a3, Pcdh11x, Upp2, Meg3, Samd4, Cntnap2, Tmem132b, Mctp1, Jakmip2, Dner, Cacnb4, Kif26b, D430041D05Rik, Naaladl2, Sgcz, Brinp1, Xkr6, Atp8a2, Stxbp1, Dnajc6, Brinp3, Rps2, Diaph2, Igsf8, Rpsa, Plcl1, Ubc, Ifitm3, Epas1, Cobll1, Rps4x, Actb, Rpl3, Cfl1, Cdc42, Spock2, ENSMUSG00000040904, Rps29, Rps24, B2m, Atp6v0c, Rap1a, R…	1619
GO:0070925	organelle assembly	82	14	7.31	0.01109	0.85064	3dpi	BP	NonN_8	GO:0070925	Dynll1, Ntrk3, Rpl11, Rpl24, Rpl3, Rpl38, Rpl6, Rps14, Rps2, Rps27, Rps3, Rps5, Rpsa, Septin7	144	Kcnb2, Rbfox3, Cdh18, Hs3st4, Grik1, Trhde, Dpp6, Sgcd, Pcdh10, Ntrk3, Slc8a3, Pcdh11x, Upp2, Meg3, Samd4, Cntnap2, Tmem132b, Mctp1, Jakmip2, Dner, Cacnb4, Kif26b, D430041D05Rik, Naaladl2, Sgcz, Brinp1, Xkr6, Atp8a2, Stxbp1, Dnajc6, Brinp3, Rps2, Diaph2, Igsf8, Rpsa, Plcl1, Ubc, Ifitm3, Epas1, Cobll1, Rps4x, Actb, Rpl3, Cfl1, Cdc42, Spock2, ENSMUSG00000040904, Rps29, Rps24, B2m, Atp6v0c, Rap1a, R…	1619
GO:0006941	striated muscle contraction	29	7	2.59	0.01125	0.01125	3dpi	BP	NonN_8	GO:0006941	Aldoa, Atp1a2, Atp8a2, Calm1, Calm2, Sgcd, Slc8a3	144	Kcnb2, Rbfox3, Cdh18, Hs3st4, Grik1, Trhde, Dpp6, Sgcd, Pcdh10, Ntrk3, Slc8a3, Pcdh11x, Upp2, Meg3, Samd4, Cntnap2, Tmem132b, Mctp1, Jakmip2, Dner, Cacnb4, Kif26b, D430041D05Rik, Naaladl2, Sgcz, Brinp1, Xkr6, Atp8a2, Stxbp1, Dnajc6, Brinp3, Rps2, Diaph2, Igsf8, Rpsa, Plcl1, Ubc, Ifitm3, Epas1, Cobll1, Rps4x, Actb, Rpl3, Cfl1, Cdc42, Spock2, ENSMUSG00000040904, Rps29, Rps24, B2m, Atp6v0c, Rap1a, R…	1619
GO:0010922	positive regulation of phosphatase activ...	6	3	0.54	0.01135	1.00000	3dpi	BP	NonN_8	GO:0010922	Calm1, Calm2, Hsp90ab1	144	Kcnb2, Rbfox3, Cdh18, Hs3st4, Grik1, Trhde, Dpp6, Sgcd, Pcdh10, Ntrk3, Slc8a3, Pcdh11x, Upp2, Meg3, Samd4, Cntnap2, Tmem132b, Mctp1, Jakmip2, Dner, Cacnb4, Kif26b, D430041D05Rik, Naaladl2, Sgcz, Brinp1, Xkr6, Atp8a2, Stxbp1, Dnajc6, Brinp3, Rps2, Diaph2, Igsf8, Rpsa, Plcl1, Ubc, Ifitm3, Epas1, Cobll1, Rps4x, Actb, Rpl3, Cfl1, Cdc42, Spock2, ENSMUSG00000040904, Rps29, Rps24, B2m, Atp6v0c, Rap1a, R…	1619
GO:0061844	antimicrobial humoral immune response me...	6	3	0.54	0.01135	0.01135	3dpi	BP	NonN_8	GO:0061844	B2m, Fau, Rpl30	144	Kcnb2, Rbfox3, Cdh18, Hs3st4, Grik1, Trhde, Dpp6, Sgcd, Pcdh10, Ntrk3, Slc8a3, Pcdh11x, Upp2, Meg3, Samd4, Cntnap2, Tmem132b, Mctp1, Jakmip2, Dner, Cacnb4, Kif26b, D430041D05Rik, Naaladl2, Sgcz, Brinp1, Xkr6, Atp8a2, Stxbp1, Dnajc6, Brinp3, Rps2, Diaph2, Igsf8, Rpsa, Plcl1, Ubc, Ifitm3, Epas1, Cobll1, Rps4x, Actb, Rpl3, Cfl1, Cdc42, Spock2, ENSMUSG00000040904, Rps29, Rps24, B2m, Atp6v0c, Rap1a, R…	1619
GO:1903170	negative regulation of calcium ion trans...	6	3	0.54	0.01135	0.01135	3dpi	BP	NonN_8	GO:1903170	Atp1a2, Calm1, Calm2	144	Kcnb2, Rbfox3, Cdh18, Hs3st4, Grik1, Trhde, Dpp6, Sgcd, Pcdh10, Ntrk3, Slc8a3, Pcdh11x, Upp2, Meg3, Samd4, Cntnap2, Tmem132b, Mctp1, Jakmip2, Dner, Cacnb4, Kif26b, D430041D05Rik, Naaladl2, Sgcz, Brinp1, Xkr6, Atp8a2, Stxbp1, Dnajc6, Brinp3, Rps2, Diaph2, Igsf8, Rpsa, Plcl1, Ubc, Ifitm3, Epas1, Cobll1, Rps4x, Actb, Rpl3, Cfl1, Cdc42, Spock2, ENSMUSG00000040904, Rps29, Rps24, B2m, Atp6v0c, Rap1a, R…	1619
GO:2000059	negative regulation of ubiquitin-depende...	6	3	0.54	0.01135	0.01135	3dpi	BP	NonN_8	GO:2000059	Hsp90ab1, Rpl11, Rpl23	144	Kcnb2, Rbfox3, Cdh18, Hs3st4, Grik1, Trhde, Dpp6, Sgcd, Pcdh10, Ntrk3, Slc8a3, Pcdh11x, Upp2, Meg3, Samd4, Cntnap2, Tmem132b, Mctp1, Jakmip2, Dner, Cacnb4, Kif26b, D430041D05Rik, Naaladl2, Sgcz, Brinp1, Xkr6, Atp8a2, Stxbp1, Dnajc6, Brinp3, Rps2, Diaph2, Igsf8, Rpsa, Plcl1, Ubc, Ifitm3, Epas1, Cobll1, Rps4x, Actb, Rpl3, Cfl1, Cdc42, Spock2, ENSMUSG00000040904, Rps29, Rps24, B2m, Atp6v0c, Rap1a, R…	1619
GO:0065003	protein-containing complex assembly	164	23	14.62	0.01459	0.50466	3dpi	BP	NonN_8	GO:0065003	B2m, Cdc42, Cfl1, Cox7a2, Diaph2, Gpx4, H3f3b, Hsp90ab1, Kcnb2, Ndufc2, Rpl11, Rpl24, Rpl3, Rpl38, Rpl6, Rps14, Rps2, Rps27, Rps3, Rps5, Rpsa, Stxbp1, Tmsb10	144	Kcnb2, Rbfox3, Cdh18, Hs3st4, Grik1, Trhde, Dpp6, Sgcd, Pcdh10, Ntrk3, Slc8a3, Pcdh11x, Upp2, Meg3, Samd4, Cntnap2, Tmem132b, Mctp1, Jakmip2, Dner, Cacnb4, Kif26b, D430041D05Rik, Naaladl2, Sgcz, Brinp1, Xkr6, Atp8a2, Stxbp1, Dnajc6, Brinp3, Rps2, Diaph2, Igsf8, Rpsa, Plcl1, Ubc, Ifitm3, Epas1, Cobll1, Rps4x, Actb, Rpl3, Cfl1, Cdc42, Spock2, ENSMUSG00000040904, Rps29, Rps24, B2m, Atp6v0c, Rap1a, R…	1619
GO:0006979	response to oxidative stress	53	10	4.73	0.01574	0.01574	3dpi	BP	NonN_8	GO:0006979	Cfl1, Chchd2, Cst3, Epas1, Gpx4, Gstp1, Mctp1, Ppia, Prdx1, Rps3	144	Kcnb2, Rbfox3, Cdh18, Hs3st4, Grik1, Trhde, Dpp6, Sgcd, Pcdh10, Ntrk3, Slc8a3, Pcdh11x, Upp2, Meg3, Samd4, Cntnap2, Tmem132b, Mctp1, Jakmip2, Dner, Cacnb4, Kif26b, D430041D05Rik, Naaladl2, Sgcz, Brinp1, Xkr6, Atp8a2, Stxbp1, Dnajc6, Brinp3, Rps2, Diaph2, Igsf8, Rpsa, Plcl1, Ubc, Ifitm3, Epas1, Cobll1, Rps4x, Actb, Rpl3, Cfl1, Cdc42, Spock2, ENSMUSG00000040904, Rps29, Rps24, B2m, Atp6v0c, Rap1a, R…	1619
GO:0007601	visual perception	7	3	0.62	0.01857	0.01857	3dpi	BP	NonN_8	GO:0007601	Atp8a2, Cacnb4, Epas1	144	Kcnb2, Rbfox3, Cdh18, Hs3st4, Grik1, Trhde, Dpp6, Sgcd, Pcdh10, Ntrk3, Slc8a3, Pcdh11x, Upp2, Meg3, Samd4, Cntnap2, Tmem132b, Mctp1, Jakmip2, Dner, Cacnb4, Kif26b, D430041D05Rik, Naaladl2, Sgcz, Brinp1, Xkr6, Atp8a2, Stxbp1, Dnajc6, Brinp3, Rps2, Diaph2, Igsf8, Rpsa, Plcl1, Ubc, Ifitm3, Epas1, Cobll1, Rps4x, Actb, Rpl3, Cfl1, Cdc42, Spock2, ENSMUSG00000040904, Rps29, Rps24, B2m, Atp6v0c, Rap1a, R…	1619
GO:0019730	antimicrobial humoral response	7	3	0.62	0.01857	0.01857	3dpi	BP	NonN_8	GO:0019730	B2m, Fau, Rpl30	144	Kcnb2, Rbfox3, Cdh18, Hs3st4, Grik1, Trhde, Dpp6, Sgcd, Pcdh10, Ntrk3, Slc8a3, Pcdh11x, Upp2, Meg3, Samd4, Cntnap2, Tmem132b, Mctp1, Jakmip2, Dner, Cacnb4, Kif26b, D430041D05Rik, Naaladl2, Sgcz, Brinp1, Xkr6, Atp8a2, Stxbp1, Dnajc6, Brinp3, Rps2, Diaph2, Igsf8, Rpsa, Plcl1, Ubc, Ifitm3, Epas1, Cobll1, Rps4x, Actb, Rpl3, Cfl1, Cdc42, Spock2, ENSMUSG00000040904, Rps29, Rps24, B2m, Atp6v0c, Rap1a, R…	1619
GO:0050953	sensory perception of light stimulus	7	3	0.62	0.01857	0.01857	3dpi	BP	NonN_8	GO:0050953	Atp8a2, Cacnb4, Epas1	144	Kcnb2, Rbfox3, Cdh18, Hs3st4, Grik1, Trhde, Dpp6, Sgcd, Pcdh10, Ntrk3, Slc8a3, Pcdh11x, Upp2, Meg3, Samd4, Cntnap2, Tmem132b, Mctp1, Jakmip2, Dner, Cacnb4, Kif26b, D430041D05Rik, Naaladl2, Sgcz, Brinp1, Xkr6, Atp8a2, Stxbp1, Dnajc6, Brinp3, Rps2, Diaph2, Igsf8, Rpsa, Plcl1, Ubc, Ifitm3, Epas1, Cobll1, Rps4x, Actb, Rpl3, Cfl1, Cdc42, Spock2, ENSMUSG00000040904, Rps29, Rps24, B2m, Atp6v0c, Rap1a, R…	1619
GO:1903051	negative regulation of proteolysis invol...	7	3	0.62	0.01857	0.01857	3dpi	BP	NonN_8	GO:1903051	Hsp90ab1, Rpl11, Rpl23	144	Kcnb2, Rbfox3, Cdh18, Hs3st4, Grik1, Trhde, Dpp6, Sgcd, Pcdh10, Ntrk3, Slc8a3, Pcdh11x, Upp2, Meg3, Samd4, Cntnap2, Tmem132b, Mctp1, Jakmip2, Dner, Cacnb4, Kif26b, D430041D05Rik, Naaladl2, Sgcz, Brinp1, Xkr6, Atp8a2, Stxbp1, Dnajc6, Brinp3, Rps2, Diaph2, Igsf8, Rpsa, Plcl1, Ubc, Ifitm3, Epas1, Cobll1, Rps4x, Actb, Rpl3, Cfl1, Cdc42, Spock2, ENSMUSG00000040904, Rps29, Rps24, B2m, Atp6v0c, Rap1a, R…	1619
GO:0007292	female gamete generation	13	4	1.16	0.02288	0.02288	3dpi	BP	NonN_8	GO:0007292	Diaph2, H3f3b, Ptn, Ubb	144	Kcnb2, Rbfox3, Cdh18, Hs3st4, Grik1, Trhde, Dpp6, Sgcd, Pcdh10, Ntrk3, Slc8a3, Pcdh11x, Upp2, Meg3, Samd4, Cntnap2, Tmem132b, Mctp1, Jakmip2, Dner, Cacnb4, Kif26b, D430041D05Rik, Naaladl2, Sgcz, Brinp1, Xkr6, Atp8a2, Stxbp1, Dnajc6, Brinp3, Rps2, Diaph2, Igsf8, Rpsa, Plcl1, Ubc, Ifitm3, Epas1, Cobll1, Rps4x, Actb, Rpl3, Cfl1, Cdc42, Spock2, ENSMUSG00000040904, Rps29, Rps24, B2m, Atp6v0c, Rap1a, R…	1619
GO:0043393	regulation of protein binding	26	6	2.32	0.02320	0.02320	3dpi	BP	NonN_8	GO:0043393	Actb, B2m, Cdc42, Hsp90ab1, Plcl1, Rpl11	144	Kcnb2, Rbfox3, Cdh18, Hs3st4, Grik1, Trhde, Dpp6, Sgcd, Pcdh10, Ntrk3, Slc8a3, Pcdh11x, Upp2, Meg3, Samd4, Cntnap2, Tmem132b, Mctp1, Jakmip2, Dner, Cacnb4, Kif26b, D430041D05Rik, Naaladl2, Sgcz, Brinp1, Xkr6, Atp8a2, Stxbp1, Dnajc6, Brinp3, Rps2, Diaph2, Igsf8, Rpsa, Plcl1, Ubc, Ifitm3, Epas1, Cobll1, Rps4x, Actb, Rpl3, Cfl1, Cdc42, Spock2, ENSMUSG00000040904, Rps29, Rps24, B2m, Atp6v0c, Rap1a, R…	1619
GO:0048477	oogenesis	8	3	0.71	0.02780	0.02780	3dpi	BP	NonN_8	GO:0048477	Diaph2, H3f3b, Ptn	144	Kcnb2, Rbfox3, Cdh18, Hs3st4, Grik1, Trhde, Dpp6, Sgcd, Pcdh10, Ntrk3, Slc8a3, Pcdh11x, Upp2, Meg3, Samd4, Cntnap2, Tmem132b, Mctp1, Jakmip2, Dner, Cacnb4, Kif26b, D430041D05Rik, Naaladl2, Sgcz, Brinp1, Xkr6, Atp8a2, Stxbp1, Dnajc6, Brinp3, Rps2, Diaph2, Igsf8, Rpsa, Plcl1, Ubc, Ifitm3, Epas1, Cobll1, Rps4x, Actb, Rpl3, Cfl1, Cdc42, Spock2, ENSMUSG00000040904, Rps29, Rps24, B2m, Atp6v0c, Rap1a, R…	1619
GO:1903363	negative regulation of cellular protein ...	8	3	0.71	0.02780	0.02780	3dpi	BP	NonN_8	GO:1903363	Hsp90ab1, Rpl11, Rpl23	144	Kcnb2, Rbfox3, Cdh18, Hs3st4, Grik1, Trhde, Dpp6, Sgcd, Pcdh10, Ntrk3, Slc8a3, Pcdh11x, Upp2, Meg3, Samd4, Cntnap2, Tmem132b, Mctp1, Jakmip2, Dner, Cacnb4, Kif26b, D430041D05Rik, Naaladl2, Sgcz, Brinp1, Xkr6, Atp8a2, Stxbp1, Dnajc6, Brinp3, Rps2, Diaph2, Igsf8, Rpsa, Plcl1, Ubc, Ifitm3, Epas1, Cobll1, Rps4x, Actb, Rpl3, Cfl1, Cdc42, Spock2, ENSMUSG00000040904, Rps29, Rps24, B2m, Atp6v0c, Rap1a, R…	1619
GO:0043170	macromolecule metabolic process	762	79	67.95	0.02829	0.99624	3dpi	BP	NonN_8	GO:0043170	Actb, B2m, Bsg, Calm1, Calm2, Cd81, Cdc42, Cfl1, Chchd2, Cst3, Dner, Dpp6, Eif1, Elob, Epas1, Fau, Gstp1, H3f3b, Hint1, Hsp90ab1, Itm2b, Meg3, Ndfip1, Ndufa7, Ntrk3, Pfdn5, Plcl1, Ppia, Ptma, Rap1a, Rbfox3, Rpl11, Rpl13, Rpl14, Rpl17, Rpl18a, Rpl19, Rpl21, Rpl23, Rpl24, Rpl27, Rpl27a, Rpl28, Rpl3, Rpl30, Rpl35, Rpl36, Rpl37, Rpl37a, Rpl38, Rpl41, Rpl6, Rpl7, Rpl8, Rpl9, Rplp1, Rplp2, Rps11, Rps13…	144	Kcnb2, Rbfox3, Cdh18, Hs3st4, Grik1, Trhde, Dpp6, Sgcd, Pcdh10, Ntrk3, Slc8a3, Pcdh11x, Upp2, Meg3, Samd4, Cntnap2, Tmem132b, Mctp1, Jakmip2, Dner, Cacnb4, Kif26b, D430041D05Rik, Naaladl2, Sgcz, Brinp1, Xkr6, Atp8a2, Stxbp1, Dnajc6, Brinp3, Rps2, Diaph2, Igsf8, Rpsa, Plcl1, Ubc, Ifitm3, Epas1, Cobll1, Rps4x, Actb, Rpl3, Cfl1, Cdc42, Spock2, ENSMUSG00000040904, Rps29, Rps24, B2m, Atp6v0c, Rap1a, R…	1619
GO:2001259	positive regulation of cation channel ac...	14	4	1.25	0.02986	0.02986	3dpi	BP	NonN_8	GO:2001259	Cacnb4, Calm1, Calm2, Cfl1	144	Kcnb2, Rbfox3, Cdh18, Hs3st4, Grik1, Trhde, Dpp6, Sgcd, Pcdh10, Ntrk3, Slc8a3, Pcdh11x, Upp2, Meg3, Samd4, Cntnap2, Tmem132b, Mctp1, Jakmip2, Dner, Cacnb4, Kif26b, D430041D05Rik, Naaladl2, Sgcz, Brinp1, Xkr6, Atp8a2, Stxbp1, Dnajc6, Brinp3, Rps2, Diaph2, Igsf8, Rpsa, Plcl1, Ubc, Ifitm3, Epas1, Cobll1, Rps4x, Actb, Rpl3, Cfl1, Cdc42, Spock2, ENSMUSG00000040904, Rps29, Rps24, B2m, Atp6v0c, Rap1a, R…	1619
GO:0051606	detection of stimulus	21	5	1.87	0.03309	0.03309	3dpi	BP	NonN_8	GO:0051606	Atp8a2, Cacnb4, Calm1, Calm2, Rps3	144	Kcnb2, Rbfox3, Cdh18, Hs3st4, Grik1, Trhde, Dpp6, Sgcd, Pcdh10, Ntrk3, Slc8a3, Pcdh11x, Upp2, Meg3, Samd4, Cntnap2, Tmem132b, Mctp1, Jakmip2, Dner, Cacnb4, Kif26b, D430041D05Rik, Naaladl2, Sgcz, Brinp1, Xkr6, Atp8a2, Stxbp1, Dnajc6, Brinp3, Rps2, Diaph2, Igsf8, Rpsa, Plcl1, Ubc, Ifitm3, Epas1, Cobll1, Rps4x, Actb, Rpl3, Cfl1, Cdc42, Spock2, ENSMUSG00000040904, Rps29, Rps24, B2m, Atp6v0c, Rap1a, R…	1619
GO:0009987	cellular process	1380	129	123.05	0.03401	0.35115	3dpi	BP	NonN_8	GO:0009987	Actb, Aldoa, Atp1a2, Atp5j, Atp5j2, Atp6v0c, Atp8a2, B2m, Brinp1, Brinp3, Bsg, Cacnb4, Calm1, Calm2, Cd81, Cdc42, Cdh18, Cfl1, Chchd2, Ckb, Cntnap2, Cox4i1, Cox5a, Cox7a2, Cst3, Diaph2, Dnajc6, Dner, Dpp6, Dynll1, Eif1, Elob, Epas1, Fau, Ftl1, Gpx4, Grik1, Gstp1, H3f3b, Hint1, Hsp90ab1, Ifitm3, Igfbp7, Igsf8, Itm2b, Kcnb2, Kif26b, Mctp1, Meg3, Mt1, Ndfip1, Ndufa4, Ndufa7, Ndufc2, Ntrk3, Pcdh10, P…	144	Kcnb2, Rbfox3, Cdh18, Hs3st4, Grik1, Trhde, Dpp6, Sgcd, Pcdh10, Ntrk3, Slc8a3, Pcdh11x, Upp2, Meg3, Samd4, Cntnap2, Tmem132b, Mctp1, Jakmip2, Dner, Cacnb4, Kif26b, D430041D05Rik, Naaladl2, Sgcz, Brinp1, Xkr6, Atp8a2, Stxbp1, Dnajc6, Brinp3, Rps2, Diaph2, Igsf8, Rpsa, Plcl1, Ubc, Ifitm3, Epas1, Cobll1, Rps4x, Actb, Rpl3, Cfl1, Cdc42, Spock2, ENSMUSG00000040904, Rps29, Rps24, B2m, Atp6v0c, Rap1a, R…	1619
GO:0060047	heart contraction	44	8	3.92	0.03649	0.03649	3dpi	BP	NonN_8	GO:0060047	Atp1a2, Atp5j, Calm1, Calm2, Cdc42, Epas1, Sgcd, Sgcz	144	Kcnb2, Rbfox3, Cdh18, Hs3st4, Grik1, Trhde, Dpp6, Sgcd, Pcdh10, Ntrk3, Slc8a3, Pcdh11x, Upp2, Meg3, Samd4, Cntnap2, Tmem132b, Mctp1, Jakmip2, Dner, Cacnb4, Kif26b, D430041D05Rik, Naaladl2, Sgcz, Brinp1, Xkr6, Atp8a2, Stxbp1, Dnajc6, Brinp3, Rps2, Diaph2, Igsf8, Rpsa, Plcl1, Ubc, Ifitm3, Epas1, Cobll1, Rps4x, Actb, Rpl3, Cfl1, Cdc42, Spock2, ENSMUSG00000040904, Rps29, Rps24, B2m, Atp6v0c, Rap1a, R…	1619
GO:0031397	negative regulation of protein ubiquitin...	15	4	1.34	0.03797	0.03797	3dpi	BP	NonN_8	GO:0031397	Ppia, Rpl11, Rpl23, Rps3	144	Kcnb2, Rbfox3, Cdh18, Hs3st4, Grik1, Trhde, Dpp6, Sgcd, Pcdh10, Ntrk3, Slc8a3, Pcdh11x, Upp2, Meg3, Samd4, Cntnap2, Tmem132b, Mctp1, Jakmip2, Dner, Cacnb4, Kif26b, D430041D05Rik, Naaladl2, Sgcz, Brinp1, Xkr6, Atp8a2, Stxbp1, Dnajc6, Brinp3, Rps2, Diaph2, Igsf8, Rpsa, Plcl1, Ubc, Ifitm3, Epas1, Cobll1, Rps4x, Actb, Rpl3, Cfl1, Cdc42, Spock2, ENSMUSG00000040904, Rps29, Rps24, B2m, Atp6v0c, Rap1a, R…	1619
GO:0045930	negative regulation of mitotic cell cycl...	15	4	1.34	0.03797	0.03797	3dpi	BP	NonN_8	GO:0045930	Brinp1, Brinp3, Cacnb4, Rpl24	144	Kcnb2, Rbfox3, Cdh18, Hs3st4, Grik1, Trhde, Dpp6, Sgcd, Pcdh10, Ntrk3, Slc8a3, Pcdh11x, Upp2, Meg3, Samd4, Cntnap2, Tmem132b, Mctp1, Jakmip2, Dner, Cacnb4, Kif26b, D430041D05Rik, Naaladl2, Sgcz, Brinp1, Xkr6, Atp8a2, Stxbp1, Dnajc6, Brinp3, Rps2, Diaph2, Igsf8, Rpsa, Plcl1, Ubc, Ifitm3, Epas1, Cobll1, Rps4x, Actb, Rpl3, Cfl1, Cdc42, Spock2, ENSMUSG00000040904, Rps29, Rps24, B2m, Atp6v0c, Rap1a, R…	1619
GO:0016032	viral process	29	6	2.59	0.03836	0.03836	3dpi	BP	NonN_8	GO:0016032	Bsg, Cdc42, Cfl1, Hsp90ab1, Ifitm3, Ppia	144	Kcnb2, Rbfox3, Cdh18, Hs3st4, Grik1, Trhde, Dpp6, Sgcd, Pcdh10, Ntrk3, Slc8a3, Pcdh11x, Upp2, Meg3, Samd4, Cntnap2, Tmem132b, Mctp1, Jakmip2, Dner, Cacnb4, Kif26b, D430041D05Rik, Naaladl2, Sgcz, Brinp1, Xkr6, Atp8a2, Stxbp1, Dnajc6, Brinp3, Rps2, Diaph2, Igsf8, Rpsa, Plcl1, Ubc, Ifitm3, Epas1, Cobll1, Rps4x, Actb, Rpl3, Cfl1, Cdc42, Spock2, ENSMUSG00000040904, Rps29, Rps24, B2m, Atp6v0c, Rap1a, R…	1619
GO:0033559	unsaturated fatty acid metabolic process	9	3	0.8	0.03903	0.03903	3dpi	BP	NonN_8	GO:0033559	Gpx4, Gstp1, Ptgds	144	Kcnb2, Rbfox3, Cdh18, Hs3st4, Grik1, Trhde, Dpp6, Sgcd, Pcdh10, Ntrk3, Slc8a3, Pcdh11x, Upp2, Meg3, Samd4, Cntnap2, Tmem132b, Mctp1, Jakmip2, Dner, Cacnb4, Kif26b, D430041D05Rik, Naaladl2, Sgcz, Brinp1, Xkr6, Atp8a2, Stxbp1, Dnajc6, Brinp3, Rps2, Diaph2, Igsf8, Rpsa, Plcl1, Ubc, Ifitm3, Epas1, Cobll1, Rps4x, Actb, Rpl3, Cfl1, Cdc42, Spock2, ENSMUSG00000040904, Rps29, Rps24, B2m, Atp6v0c, Rap1a, R…	1619
GO:0072332	intrinsic apoptotic signaling pathway by...	9	3	0.8	0.03903	0.03903	3dpi	BP	NonN_8	GO:0072332	Hint1, Rpl11, Ubb	144	Kcnb2, Rbfox3, Cdh18, Hs3st4, Grik1, Trhde, Dpp6, Sgcd, Pcdh10, Ntrk3, Slc8a3, Pcdh11x, Upp2, Meg3, Samd4, Cntnap2, Tmem132b, Mctp1, Jakmip2, Dner, Cacnb4, Kif26b, D430041D05Rik, Naaladl2, Sgcz, Brinp1, Xkr6, Atp8a2, Stxbp1, Dnajc6, Brinp3, Rps2, Diaph2, Igsf8, Rpsa, Plcl1, Ubc, Ifitm3, Epas1, Cobll1, Rps4x, Actb, Rpl3, Cfl1, Cdc42, Spock2, ENSMUSG00000040904, Rps29, Rps24, B2m, Atp6v0c, Rap1a, R…	1619
GO:2001244	positive regulation of intrinsic apoptot...	9	3	0.8	0.03903	0.03903	3dpi	BP	NonN_8	GO:2001244	Rpl11, Rps3, Ubb	144	Kcnb2, Rbfox3, Cdh18, Hs3st4, Grik1, Trhde, Dpp6, Sgcd, Pcdh10, Ntrk3, Slc8a3, Pcdh11x, Upp2, Meg3, Samd4, Cntnap2, Tmem132b, Mctp1, Jakmip2, Dner, Cacnb4, Kif26b, D430041D05Rik, Naaladl2, Sgcz, Brinp1, Xkr6, Atp8a2, Stxbp1, Dnajc6, Brinp3, Rps2, Diaph2, Igsf8, Rpsa, Plcl1, Ubc, Ifitm3, Epas1, Cobll1, Rps4x, Actb, Rpl3, Cfl1, Cdc42, Spock2, ENSMUSG00000040904, Rps29, Rps24, B2m, Atp6v0c, Rap1a, R…	1619
GO:0050727	regulation of inflammatory response	22	5	1.96	0.03984	0.03984	3dpi	BP	NonN_8	GO:0050727	Cd81, Gpx4, Gstp1, Ndfip1, Ndufc2	144	Kcnb2, Rbfox3, Cdh18, Hs3st4, Grik1, Trhde, Dpp6, Sgcd, Pcdh10, Ntrk3, Slc8a3, Pcdh11x, Upp2, Meg3, Samd4, Cntnap2, Tmem132b, Mctp1, Jakmip2, Dner, Cacnb4, Kif26b, D430041D05Rik, Naaladl2, Sgcz, Brinp1, Xkr6, Atp8a2, Stxbp1, Dnajc6, Brinp3, Rps2, Diaph2, Igsf8, Rpsa, Plcl1, Ubc, Ifitm3, Epas1, Cobll1, Rps4x, Actb, Rpl3, Cfl1, Cdc42, Spock2, ENSMUSG00000040904, Rps29, Rps24, B2m, Atp6v0c, Rap1a, R…	1619
GO:0044260	cellular macromolecule metabolic process	672	70	59.92	0.04138	0.99931	3dpi	BP	NonN_8	GO:0044260	Actb, Calm1, Calm2, Cd81, Cdc42, Cfl1, Chchd2, Cst3, Dner, Eif1, Elob, Epas1, Fau, Gstp1, Hint1, Hsp90ab1, Itm2b, Meg3, Ndfip1, Ndufa7, Ntrk3, Pfdn5, Plcl1, Ppia, Ptma, Rap1a, Rpl11, Rpl13, Rpl14, Rpl17, Rpl18a, Rpl19, Rpl21, Rpl23, Rpl24, Rpl27a, Rpl28, Rpl3, Rpl30, Rpl35, Rpl36, Rpl37, Rpl37a, Rpl38, Rpl41, Rpl6, Rpl7, Rpl8, Rpl9, Rplp1, Rplp2, Rps11, Rps13, Rps14, Rps2, Rps20, Rps21, Rps24, Rp…	144	Kcnb2, Rbfox3, Cdh18, Hs3st4, Grik1, Trhde, Dpp6, Sgcd, Pcdh10, Ntrk3, Slc8a3, Pcdh11x, Upp2, Meg3, Samd4, Cntnap2, Tmem132b, Mctp1, Jakmip2, Dner, Cacnb4, Kif26b, D430041D05Rik, Naaladl2, Sgcz, Brinp1, Xkr6, Atp8a2, Stxbp1, Dnajc6, Brinp3, Rps2, Diaph2, Igsf8, Rpsa, Plcl1, Ubc, Ifitm3, Epas1, Cobll1, Rps4x, Actb, Rpl3, Cfl1, Cdc42, Spock2, ENSMUSG00000040904, Rps29, Rps24, B2m, Atp6v0c, Rap1a, R…	1619
GO:0001906	cell killing	16	4	1.43	0.04723	0.04723	3dpi	BP	NonN_8	GO:0001906	B2m, Hsp90ab1, Prdx1, Rpl30	144	Kcnb2, Rbfox3, Cdh18, Hs3st4, Grik1, Trhde, Dpp6, Sgcd, Pcdh10, Ntrk3, Slc8a3, Pcdh11x, Upp2, Meg3, Samd4, Cntnap2, Tmem132b, Mctp1, Jakmip2, Dner, Cacnb4, Kif26b, D430041D05Rik, Naaladl2, Sgcz, Brinp1, Xkr6, Atp8a2, Stxbp1, Dnajc6, Brinp3, Rps2, Diaph2, Igsf8, Rpsa, Plcl1, Ubc, Ifitm3, Epas1, Cobll1, Rps4x, Actb, Rpl3, Cfl1, Cdc42, Spock2, ENSMUSG00000040904, Rps29, Rps24, B2m, Atp6v0c, Rap1a, R…	1619
GO:0006754	ATP biosynthetic process	16	4	1.43	0.04723	0.04723	3dpi	BP	NonN_8	GO:0006754	Aldoa, Atp5j, Atp5j2, Ndufc2	144	Kcnb2, Rbfox3, Cdh18, Hs3st4, Grik1, Trhde, Dpp6, Sgcd, Pcdh10, Ntrk3, Slc8a3, Pcdh11x, Upp2, Meg3, Samd4, Cntnap2, Tmem132b, Mctp1, Jakmip2, Dner, Cacnb4, Kif26b, D430041D05Rik, Naaladl2, Sgcz, Brinp1, Xkr6, Atp8a2, Stxbp1, Dnajc6, Brinp3, Rps2, Diaph2, Igsf8, Rpsa, Plcl1, Ubc, Ifitm3, Epas1, Cobll1, Rps4x, Actb, Rpl3, Cfl1, Cdc42, Spock2, ENSMUSG00000040904, Rps29, Rps24, B2m, Atp6v0c, Rap1a, R…	1619
GO:0006959	humoral immune response	16	4	1.43	0.04723	0.04723	3dpi	BP	NonN_8	GO:0006959	B2m, Cd81, Fau, Rpl30	144	Kcnb2, Rbfox3, Cdh18, Hs3st4, Grik1, Trhde, Dpp6, Sgcd, Pcdh10, Ntrk3, Slc8a3, Pcdh11x, Upp2, Meg3, Samd4, Cntnap2, Tmem132b, Mctp1, Jakmip2, Dner, Cacnb4, Kif26b, D430041D05Rik, Naaladl2, Sgcz, Brinp1, Xkr6, Atp8a2, Stxbp1, Dnajc6, Brinp3, Rps2, Diaph2, Igsf8, Rpsa, Plcl1, Ubc, Ifitm3, Epas1, Cobll1, Rps4x, Actb, Rpl3, Cfl1, Cdc42, Spock2, ENSMUSG00000040904, Rps29, Rps24, B2m, Atp6v0c, Rap1a, R…	1619
GO:0009201	ribonucleoside triphosphate biosynthetic...	16	4	1.43	0.04723	0.04723	3dpi	BP	NonN_8	GO:0009201	Aldoa, Atp5j, Atp5j2, Ndufc2	144	Kcnb2, Rbfox3, Cdh18, Hs3st4, Grik1, Trhde, Dpp6, Sgcd, Pcdh10, Ntrk3, Slc8a3, Pcdh11x, Upp2, Meg3, Samd4, Cntnap2, Tmem132b, Mctp1, Jakmip2, Dner, Cacnb4, Kif26b, D430041D05Rik, Naaladl2, Sgcz, Brinp1, Xkr6, Atp8a2, Stxbp1, Dnajc6, Brinp3, Rps2, Diaph2, Igsf8, Rpsa, Plcl1, Ubc, Ifitm3, Epas1, Cobll1, Rps4x, Actb, Rpl3, Cfl1, Cdc42, Spock2, ENSMUSG00000040904, Rps29, Rps24, B2m, Atp6v0c, Rap1a, R…	1619
GO:0009206	purine ribonucleoside triphosphate biosy...	16	4	1.43	0.04723	0.04723	3dpi	BP	NonN_8	GO:0009206	Aldoa, Atp5j, Atp5j2, Ndufc2	144	Kcnb2, Rbfox3, Cdh18, Hs3st4, Grik1, Trhde, Dpp6, Sgcd, Pcdh10, Ntrk3, Slc8a3, Pcdh11x, Upp2, Meg3, Samd4, Cntnap2, Tmem132b, Mctp1, Jakmip2, Dner, Cacnb4, Kif26b, D430041D05Rik, Naaladl2, Sgcz, Brinp1, Xkr6, Atp8a2, Stxbp1, Dnajc6, Brinp3, Rps2, Diaph2, Igsf8, Rpsa, Plcl1, Ubc, Ifitm3, Epas1, Cobll1, Rps4x, Actb, Rpl3, Cfl1, Cdc42, Spock2, ENSMUSG00000040904, Rps29, Rps24, B2m, Atp6v0c, Rap1a, R…	1619
GO:1903321	negative regulation of protein modificat...	16	4	1.43	0.04723	0.04723	3dpi	BP	NonN_8	GO:1903321	Ppia, Rpl11, Rpl23, Rps3	144	Kcnb2, Rbfox3, Cdh18, Hs3st4, Grik1, Trhde, Dpp6, Sgcd, Pcdh10, Ntrk3, Slc8a3, Pcdh11x, Upp2, Meg3, Samd4, Cntnap2, Tmem132b, Mctp1, Jakmip2, Dner, Cacnb4, Kif26b, D430041D05Rik, Naaladl2, Sgcz, Brinp1, Xkr6, Atp8a2, Stxbp1, Dnajc6, Brinp3, Rps2, Diaph2, Igsf8, Rpsa, Plcl1, Ubc, Ifitm3, Epas1, Cobll1, Rps4x, Actb, Rpl3, Cfl1, Cdc42, Spock2, ENSMUSG00000040904, Rps29, Rps24, B2m, Atp6v0c, Rap1a, R…	1619
GO:0002262	myeloid cell homeostasis	23	5	2.05	0.04738	0.04738	3dpi	BP	NonN_8	GO:0002262	B2m, Epas1, Prdx1, Rps14, Rps24	144	Kcnb2, Rbfox3, Cdh18, Hs3st4, Grik1, Trhde, Dpp6, Sgcd, Pcdh10, Ntrk3, Slc8a3, Pcdh11x, Upp2, Meg3, Samd4, Cntnap2, Tmem132b, Mctp1, Jakmip2, Dner, Cacnb4, Kif26b, D430041D05Rik, Naaladl2, Sgcz, Brinp1, Xkr6, Atp8a2, Stxbp1, Dnajc6, Brinp3, Rps2, Diaph2, Igsf8, Rpsa, Plcl1, Ubc, Ifitm3, Epas1, Cobll1, Rps4x, Actb, Rpl3, Cfl1, Cdc42, Spock2, ENSMUSG00000040904, Rps29, Rps24, B2m, Atp6v0c, Rap1a, R…	1619
GO:0019058	viral life cycle	23	5	2.05	0.04738	0.04738	3dpi	BP	NonN_8	GO:0019058	Bsg, Cdc42, Hsp90ab1, Ifitm3, Ppia	144	Kcnb2, Rbfox3, Cdh18, Hs3st4, Grik1, Trhde, Dpp6, Sgcd, Pcdh10, Ntrk3, Slc8a3, Pcdh11x, Upp2, Meg3, Samd4, Cntnap2, Tmem132b, Mctp1, Jakmip2, Dner, Cacnb4, Kif26b, D430041D05Rik, Naaladl2, Sgcz, Brinp1, Xkr6, Atp8a2, Stxbp1, Dnajc6, Brinp3, Rps2, Diaph2, Igsf8, Rpsa, Plcl1, Ubc, Ifitm3, Epas1, Cobll1, Rps4x, Actb, Rpl3, Cfl1, Cdc42, Spock2, ENSMUSG00000040904, Rps29, Rps24, B2m, Atp6v0c, Rap1a, R…	1619
GO:0033555	multicellular organismal response to str...	23	5	2.05	0.04738	0.04738	3dpi	BP	NonN_8	GO:0033555	Atp1a2, Brinp1, Cntnap2, Grik1, Pde8b	144	Kcnb2, Rbfox3, Cdh18, Hs3st4, Grik1, Trhde, Dpp6, Sgcd, Pcdh10, Ntrk3, Slc8a3, Pcdh11x, Upp2, Meg3, Samd4, Cntnap2, Tmem132b, Mctp1, Jakmip2, Dner, Cacnb4, Kif26b, D430041D05Rik, Naaladl2, Sgcz, Brinp1, Xkr6, Atp8a2, Stxbp1, Dnajc6, Brinp3, Rps2, Diaph2, Igsf8, Rpsa, Plcl1, Ubc, Ifitm3, Epas1, Cobll1, Rps4x, Actb, Rpl3, Cfl1, Cdc42, Spock2, ENSMUSG00000040904, Rps29, Rps24, B2m, Atp6v0c, Rap1a, R…	1619
GO:0003015	heart process	47	8	4.19	0.05159	0.05159	3dpi	BP	NonN_8	GO:0003015	Atp1a2, Atp5j, Calm1, Calm2, Cdc42, Epas1, Sgcd, Sgcz	144	Kcnb2, Rbfox3, Cdh18, Hs3st4, Grik1, Trhde, Dpp6, Sgcd, Pcdh10, Ntrk3, Slc8a3, Pcdh11x, Upp2, Meg3, Samd4, Cntnap2, Tmem132b, Mctp1, Jakmip2, Dner, Cacnb4, Kif26b, D430041D05Rik, Naaladl2, Sgcz, Brinp1, Xkr6, Atp8a2, Stxbp1, Dnajc6, Brinp3, Rps2, Diaph2, Igsf8, Rpsa, Plcl1, Ubc, Ifitm3, Epas1, Cobll1, Rps4x, Actb, Rpl3, Cfl1, Cdc42, Spock2, ENSMUSG00000040904, Rps29, Rps24, B2m, Atp6v0c, Rap1a, R…	1619
GO:0006690	icosanoid metabolic process	10	3	0.89	0.05220	0.05220	3dpi	BP	NonN_8	GO:0006690	Gpx4, Gstp1, Ptgds	144	Kcnb2, Rbfox3, Cdh18, Hs3st4, Grik1, Trhde, Dpp6, Sgcd, Pcdh10, Ntrk3, Slc8a3, Pcdh11x, Upp2, Meg3, Samd4, Cntnap2, Tmem132b, Mctp1, Jakmip2, Dner, Cacnb4, Kif26b, D430041D05Rik, Naaladl2, Sgcz, Brinp1, Xkr6, Atp8a2, Stxbp1, Dnajc6, Brinp3, Rps2, Diaph2, Igsf8, Rpsa, Plcl1, Ubc, Ifitm3, Epas1, Cobll1, Rps4x, Actb, Rpl3, Cfl1, Cdc42, Spock2, ENSMUSG00000040904, Rps29, Rps24, B2m, Atp6v0c, Rap1a, R…	1619
GO:0021879	forebrain neuron differentiation	10	3	0.89	0.05220	0.05220	3dpi	BP	NonN_8	GO:0021879	B2m, Ubb, Uqcrq	144	Kcnb2, Rbfox3, Cdh18, Hs3st4, Grik1, Trhde, Dpp6, Sgcd, Pcdh10, Ntrk3, Slc8a3, Pcdh11x, Upp2, Meg3, Samd4, Cntnap2, Tmem132b, Mctp1, Jakmip2, Dner, Cacnb4, Kif26b, D430041D05Rik, Naaladl2, Sgcz, Brinp1, Xkr6, Atp8a2, Stxbp1, Dnajc6, Brinp3, Rps2, Diaph2, Igsf8, Rpsa, Plcl1, Ubc, Ifitm3, Epas1, Cobll1, Rps4x, Actb, Rpl3, Cfl1, Cdc42, Spock2, ENSMUSG00000040904, Rps29, Rps24, B2m, Atp6v0c, Rap1a, R…	1619
GO:0034341	response to interferon-gamma	10	3	0.89	0.05220	0.05220	3dpi	BP	NonN_8	GO:0034341	Cdc42, Ifitm3, Stxbp1	144	Kcnb2, Rbfox3, Cdh18, Hs3st4, Grik1, Trhde, Dpp6, Sgcd, Pcdh10, Ntrk3, Slc8a3, Pcdh11x, Upp2, Meg3, Samd4, Cntnap2, Tmem132b, Mctp1, Jakmip2, Dner, Cacnb4, Kif26b, D430041D05Rik, Naaladl2, Sgcz, Brinp1, Xkr6, Atp8a2, Stxbp1, Dnajc6, Brinp3, Rps2, Diaph2, Igsf8, Rpsa, Plcl1, Ubc, Ifitm3, Epas1, Cobll1, Rps4x, Actb, Rpl3, Cfl1, Cdc42, Spock2, ENSMUSG00000040904, Rps29, Rps24, B2m, Atp6v0c, Rap1a, R…	1619
GO:0046916	cellular transition metal ion homeostasi...	10	3	0.89	0.05220	0.05220	3dpi	BP	NonN_8	GO:0046916	Ftl1, Mt1, Ndfip1	144	Kcnb2, Rbfox3, Cdh18, Hs3st4, Grik1, Trhde, Dpp6, Sgcd, Pcdh10, Ntrk3, Slc8a3, Pcdh11x, Upp2, Meg3, Samd4, Cntnap2, Tmem132b, Mctp1, Jakmip2, Dner, Cacnb4, Kif26b, D430041D05Rik, Naaladl2, Sgcz, Brinp1, Xkr6, Atp8a2, Stxbp1, Dnajc6, Brinp3, Rps2, Diaph2, Igsf8, Rpsa, Plcl1, Ubc, Ifitm3, Epas1, Cobll1, Rps4x, Actb, Rpl3, Cfl1, Cdc42, Spock2, ENSMUSG00000040904, Rps29, Rps24, B2m, Atp6v0c, Rap1a, R…	1619
GO:0051438	regulation of ubiquitin-protein transfer...	10	3	0.89	0.05220	0.05220	3dpi	BP	NonN_8	GO:0051438	Rpl11, Rpl23, Rps2	144	Kcnb2, Rbfox3, Cdh18, Hs3st4, Grik1, Trhde, Dpp6, Sgcd, Pcdh10, Ntrk3, Slc8a3, Pcdh11x, Upp2, Meg3, Samd4, Cntnap2, Tmem132b, Mctp1, Jakmip2, Dner, Cacnb4, Kif26b, D430041D05Rik, Naaladl2, Sgcz, Brinp1, Xkr6, Atp8a2, Stxbp1, Dnajc6, Brinp3, Rps2, Diaph2, Igsf8, Rpsa, Plcl1, Ubc, Ifitm3, Epas1, Cobll1, Rps4x, Actb, Rpl3, Cfl1, Cdc42, Spock2, ENSMUSG00000040904, Rps29, Rps24, B2m, Atp6v0c, Rap1a, R…	1619
GO:0051926	negative regulation of calcium ion trans...	10	3	0.89	0.05220	0.05220	3dpi	BP	NonN_8	GO:0051926	Atp1a2, Calm1, Calm2	144	Kcnb2, Rbfox3, Cdh18, Hs3st4, Grik1, Trhde, Dpp6, Sgcd, Pcdh10, Ntrk3, Slc8a3, Pcdh11x, Upp2, Meg3, Samd4, Cntnap2, Tmem132b, Mctp1, Jakmip2, Dner, Cacnb4, Kif26b, D430041D05Rik, Naaladl2, Sgcz, Brinp1, Xkr6, Atp8a2, Stxbp1, Dnajc6, Brinp3, Rps2, Diaph2, Igsf8, Rpsa, Plcl1, Ubc, Ifitm3, Epas1, Cobll1, Rps4x, Actb, Rpl3, Cfl1, Cdc42, Spock2, ENSMUSG00000040904, Rps29, Rps24, B2m, Atp6v0c, Rap1a, R…	1619
GO:0070839	metal ion export	10	3	0.89	0.05220	0.05220	3dpi	BP	NonN_8	GO:0070839	Atp1a2, Calm2, Slc8a3	144	Kcnb2, Rbfox3, Cdh18, Hs3st4, Grik1, Trhde, Dpp6, Sgcd, Pcdh10, Ntrk3, Slc8a3, Pcdh11x, Upp2, Meg3, Samd4, Cntnap2, Tmem132b, Mctp1, Jakmip2, Dner, Cacnb4, Kif26b, D430041D05Rik, Naaladl2, Sgcz, Brinp1, Xkr6, Atp8a2, Stxbp1, Dnajc6, Brinp3, Rps2, Diaph2, Igsf8, Rpsa, Plcl1, Ubc, Ifitm3, Epas1, Cobll1, Rps4x, Actb, Rpl3, Cfl1, Cdc42, Spock2, ENSMUSG00000040904, Rps29, Rps24, B2m, Atp6v0c, Rap1a, R…	1619
GO:1901222	regulation of NIK/NF-kappaB signaling	10	3	0.89	0.05220	0.05220	3dpi	BP	NonN_8	GO:1901222	Ndufc2, Prdx1, Rps3	144	Kcnb2, Rbfox3, Cdh18, Hs3st4, Grik1, Trhde, Dpp6, Sgcd, Pcdh10, Ntrk3, Slc8a3, Pcdh11x, Upp2, Meg3, Samd4, Cntnap2, Tmem132b, Mctp1, Jakmip2, Dner, Cacnb4, Kif26b, D430041D05Rik, Naaladl2, Sgcz, Brinp1, Xkr6, Atp8a2, Stxbp1, Dnajc6, Brinp3, Rps2, Diaph2, Igsf8, Rpsa, Plcl1, Ubc, Ifitm3, Epas1, Cobll1, Rps4x, Actb, Rpl3, Cfl1, Cdc42, Spock2, ENSMUSG00000040904, Rps29, Rps24, B2m, Atp6v0c, Rap1a, R…	1619
GO:1903900	regulation of viral life cycle	10	3	0.89	0.05220	0.05220	3dpi	BP	NonN_8	GO:1903900	Bsg, Ifitm3, Ppia	144	Kcnb2, Rbfox3, Cdh18, Hs3st4, Grik1, Trhde, Dpp6, Sgcd, Pcdh10, Ntrk3, Slc8a3, Pcdh11x, Upp2, Meg3, Samd4, Cntnap2, Tmem132b, Mctp1, Jakmip2, Dner, Cacnb4, Kif26b, D430041D05Rik, Naaladl2, Sgcz, Brinp1, Xkr6, Atp8a2, Stxbp1, Dnajc6, Brinp3, Rps2, Diaph2, Igsf8, Rpsa, Plcl1, Ubc, Ifitm3, Epas1, Cobll1, Rps4x, Actb, Rpl3, Cfl1, Cdc42, Spock2, ENSMUSG00000040904, Rps29, Rps24, B2m, Atp6v0c, Rap1a, R…	1619
GO:1990089	response to nerve growth factor	10	3	0.89	0.05220	0.05220	3dpi	BP	NonN_8	GO:1990089	Ntrk3, Rap1a, Rps3	144	Kcnb2, Rbfox3, Cdh18, Hs3st4, Grik1, Trhde, Dpp6, Sgcd, Pcdh10, Ntrk3, Slc8a3, Pcdh11x, Upp2, Meg3, Samd4, Cntnap2, Tmem132b, Mctp1, Jakmip2, Dner, Cacnb4, Kif26b, D430041D05Rik, Naaladl2, Sgcz, Brinp1, Xkr6, Atp8a2, Stxbp1, Dnajc6, Brinp3, Rps2, Diaph2, Igsf8, Rpsa, Plcl1, Ubc, Ifitm3, Epas1, Cobll1, Rps4x, Actb, Rpl3, Cfl1, Cdc42, Spock2, ENSMUSG00000040904, Rps29, Rps24, B2m, Atp6v0c, Rap1a, R…	1619
GO:1990090	cellular response to nerve growth factor...	10	3	0.89	0.05220	0.05220	3dpi	BP	NonN_8	GO:1990090	Ntrk3, Rap1a, Rps3	144	Kcnb2, Rbfox3, Cdh18, Hs3st4, Grik1, Trhde, Dpp6, Sgcd, Pcdh10, Ntrk3, Slc8a3, Pcdh11x, Upp2, Meg3, Samd4, Cntnap2, Tmem132b, Mctp1, Jakmip2, Dner, Cacnb4, Kif26b, D430041D05Rik, Naaladl2, Sgcz, Brinp1, Xkr6, Atp8a2, Stxbp1, Dnajc6, Brinp3, Rps2, Diaph2, Igsf8, Rpsa, Plcl1, Ubc, Ifitm3, Epas1, Cobll1, Rps4x, Actb, Rpl3, Cfl1, Cdc42, Spock2, ENSMUSG00000040904, Rps29, Rps24, B2m, Atp6v0c, Rap1a, R…	1619
GO:0032446	protein modification by small protein co...	73	11	6.51	0.05376	0.71330	3dpi	BP	NonN_8	GO:0032446	Epas1, Hsp90ab1, Ndfip1, Ppia, Rpl11, Rpl23, Rps2, Rps27a, Rps3, Ubb, Ubc	144	Kcnb2, Rbfox3, Cdh18, Hs3st4, Grik1, Trhde, Dpp6, Sgcd, Pcdh10, Ntrk3, Slc8a3, Pcdh11x, Upp2, Meg3, Samd4, Cntnap2, Tmem132b, Mctp1, Jakmip2, Dner, Cacnb4, Kif26b, D430041D05Rik, Naaladl2, Sgcz, Brinp1, Xkr6, Atp8a2, Stxbp1, Dnajc6, Brinp3, Rps2, Diaph2, Igsf8, Rpsa, Plcl1, Ubc, Ifitm3, Epas1, Cobll1, Rps4x, Actb, Rpl3, Cfl1, Cdc42, Spock2, ENSMUSG00000040904, Rps29, Rps24, B2m, Atp6v0c, Rap1a, R…	1619
GO:0070647	protein modification by small protein co...	82	12	7.31	0.05444	0.64978	3dpi	BP	NonN_8	GO:0070647	Epas1, Hint1, Hsp90ab1, Ndfip1, Ppia, Rpl11, Rpl23, Rps2, Rps27a, Rps3, Ubb, Ubc	144	Kcnb2, Rbfox3, Cdh18, Hs3st4, Grik1, Trhde, Dpp6, Sgcd, Pcdh10, Ntrk3, Slc8a3, Pcdh11x, Upp2, Meg3, Samd4, Cntnap2, Tmem132b, Mctp1, Jakmip2, Dner, Cacnb4, Kif26b, D430041D05Rik, Naaladl2, Sgcz, Brinp1, Xkr6, Atp8a2, Stxbp1, Dnajc6, Brinp3, Rps2, Diaph2, Igsf8, Rpsa, Plcl1, Ubc, Ifitm3, Epas1, Cobll1, Rps4x, Actb, Rpl3, Cfl1, Cdc42, Spock2, ENSMUSG00000040904, Rps29, Rps24, B2m, Atp6v0c, Rap1a, R…	1619
GO:0000910	cytokinesis	24	5	2.14	0.05571	0.05571	3dpi	BP	NonN_8	GO:0000910	Calm1, Calm2, Cdc42, Cfl1, Septin7	144	Kcnb2, Rbfox3, Cdh18, Hs3st4, Grik1, Trhde, Dpp6, Sgcd, Pcdh10, Ntrk3, Slc8a3, Pcdh11x, Upp2, Meg3, Samd4, Cntnap2, Tmem132b, Mctp1, Jakmip2, Dner, Cacnb4, Kif26b, D430041D05Rik, Naaladl2, Sgcz, Brinp1, Xkr6, Atp8a2, Stxbp1, Dnajc6, Brinp3, Rps2, Diaph2, Igsf8, Rpsa, Plcl1, Ubc, Ifitm3, Epas1, Cobll1, Rps4x, Actb, Rpl3, Cfl1, Cdc42, Spock2, ENSMUSG00000040904, Rps29, Rps24, B2m, Atp6v0c, Rap1a, R…	1619
GO:0009142	nucleoside triphosphate biosynthetic pro...	17	4	1.52	0.05762	0.05762	3dpi	BP	NonN_8	GO:0009142	Aldoa, Atp5j, Atp5j2, Ndufc2	144	Kcnb2, Rbfox3, Cdh18, Hs3st4, Grik1, Trhde, Dpp6, Sgcd, Pcdh10, Ntrk3, Slc8a3, Pcdh11x, Upp2, Meg3, Samd4, Cntnap2, Tmem132b, Mctp1, Jakmip2, Dner, Cacnb4, Kif26b, D430041D05Rik, Naaladl2, Sgcz, Brinp1, Xkr6, Atp8a2, Stxbp1, Dnajc6, Brinp3, Rps2, Diaph2, Igsf8, Rpsa, Plcl1, Ubc, Ifitm3, Epas1, Cobll1, Rps4x, Actb, Rpl3, Cfl1, Cdc42, Spock2, ENSMUSG00000040904, Rps29, Rps24, B2m, Atp6v0c, Rap1a, R…	1619
GO:0009145	purine nucleoside triphosphate biosynthe...	17	4	1.52	0.05762	0.05762	3dpi	BP	NonN_8	GO:0009145	Aldoa, Atp5j, Atp5j2, Ndufc2	144	Kcnb2, Rbfox3, Cdh18, Hs3st4, Grik1, Trhde, Dpp6, Sgcd, Pcdh10, Ntrk3, Slc8a3, Pcdh11x, Upp2, Meg3, Samd4, Cntnap2, Tmem132b, Mctp1, Jakmip2, Dner, Cacnb4, Kif26b, D430041D05Rik, Naaladl2, Sgcz, Brinp1, Xkr6, Atp8a2, Stxbp1, Dnajc6, Brinp3, Rps2, Diaph2, Igsf8, Rpsa, Plcl1, Ubc, Ifitm3, Epas1, Cobll1, Rps4x, Actb, Rpl3, Cfl1, Cdc42, Spock2, ENSMUSG00000040904, Rps29, Rps24, B2m, Atp6v0c, Rap1a, R…	1619
GO:0032092	positive regulation of protein binding	17	4	1.52	0.05762	0.05762	3dpi	BP	NonN_8	GO:0032092	B2m, Hsp90ab1, Plcl1, Rpl11	144	Kcnb2, Rbfox3, Cdh18, Hs3st4, Grik1, Trhde, Dpp6, Sgcd, Pcdh10, Ntrk3, Slc8a3, Pcdh11x, Upp2, Meg3, Samd4, Cntnap2, Tmem132b, Mctp1, Jakmip2, Dner, Cacnb4, Kif26b, D430041D05Rik, Naaladl2, Sgcz, Brinp1, Xkr6, Atp8a2, Stxbp1, Dnajc6, Brinp3, Rps2, Diaph2, Igsf8, Rpsa, Plcl1, Ubc, Ifitm3, Epas1, Cobll1, Rps4x, Actb, Rpl3, Cfl1, Cdc42, Spock2, ENSMUSG00000040904, Rps29, Rps24, B2m, Atp6v0c, Rap1a, R…	1619
GO:0051099	positive regulation of binding	25	5	2.23	0.06483	0.06483	3dpi	BP	NonN_8	GO:0051099	B2m, Calm1, Hsp90ab1, Plcl1, Rpl11	144	Kcnb2, Rbfox3, Cdh18, Hs3st4, Grik1, Trhde, Dpp6, Sgcd, Pcdh10, Ntrk3, Slc8a3, Pcdh11x, Upp2, Meg3, Samd4, Cntnap2, Tmem132b, Mctp1, Jakmip2, Dner, Cacnb4, Kif26b, D430041D05Rik, Naaladl2, Sgcz, Brinp1, Xkr6, Atp8a2, Stxbp1, Dnajc6, Brinp3, Rps2, Diaph2, Igsf8, Rpsa, Plcl1, Ubc, Ifitm3, Epas1, Cobll1, Rps4x, Actb, Rpl3, Cfl1, Cdc42, Spock2, ENSMUSG00000040904, Rps29, Rps24, B2m, Atp6v0c, Rap1a, R…	1619
GO:0060041	retina development in camera-type eye	25	5	2.23	0.06483	0.06483	3dpi	BP	NonN_8	GO:0060041	Atp8a2, Bsg, Pfdn5, Ptn, Rpl24	144	Kcnb2, Rbfox3, Cdh18, Hs3st4, Grik1, Trhde, Dpp6, Sgcd, Pcdh10, Ntrk3, Slc8a3, Pcdh11x, Upp2, Meg3, Samd4, Cntnap2, Tmem132b, Mctp1, Jakmip2, Dner, Cacnb4, Kif26b, D430041D05Rik, Naaladl2, Sgcz, Brinp1, Xkr6, Atp8a2, Stxbp1, Dnajc6, Brinp3, Rps2, Diaph2, Igsf8, Rpsa, Plcl1, Ubc, Ifitm3, Epas1, Cobll1, Rps4x, Actb, Rpl3, Cfl1, Cdc42, Spock2, ENSMUSG00000040904, Rps29, Rps24, B2m, Atp6v0c, Rap1a, R…	1619
GO:0009259	ribonucleotide metabolic process	41	7	3.66	0.06588	0.06588	3dpi	BP	NonN_8	GO:0009259	Aldoa, Atp5j, Atp5j2, Cacnb4, Hint1, Ndufc2, Upp2	144	Kcnb2, Rbfox3, Cdh18, Hs3st4, Grik1, Trhde, Dpp6, Sgcd, Pcdh10, Ntrk3, Slc8a3, Pcdh11x, Upp2, Meg3, Samd4, Cntnap2, Tmem132b, Mctp1, Jakmip2, Dner, Cacnb4, Kif26b, D430041D05Rik, Naaladl2, Sgcz, Brinp1, Xkr6, Atp8a2, Stxbp1, Dnajc6, Brinp3, Rps2, Diaph2, Igsf8, Rpsa, Plcl1, Ubc, Ifitm3, Epas1, Cobll1, Rps4x, Actb, Rpl3, Cfl1, Cdc42, Spock2, ENSMUSG00000040904, Rps29, Rps24, B2m, Atp6v0c, Rap1a, R…	1619
GO:0009261	ribonucleotide catabolic process	5	2	0.45	0.06597	0.06597	3dpi	BP	NonN_8	GO:0009261	Hint1, Upp2	144	Kcnb2, Rbfox3, Cdh18, Hs3st4, Grik1, Trhde, Dpp6, Sgcd, Pcdh10, Ntrk3, Slc8a3, Pcdh11x, Upp2, Meg3, Samd4, Cntnap2, Tmem132b, Mctp1, Jakmip2, Dner, Cacnb4, Kif26b, D430041D05Rik, Naaladl2, Sgcz, Brinp1, Xkr6, Atp8a2, Stxbp1, Dnajc6, Brinp3, Rps2, Diaph2, Igsf8, Rpsa, Plcl1, Ubc, Ifitm3, Epas1, Cobll1, Rps4x, Actb, Rpl3, Cfl1, Cdc42, Spock2, ENSMUSG00000040904, Rps29, Rps24, B2m, Atp6v0c, Rap1a, R…	1619
GO:0032148	activation of protein kinase B activity	5	2	0.45	0.06597	0.06597	3dpi	BP	NonN_8	GO:0032148	Ntrk3, Ppia	144	Kcnb2, Rbfox3, Cdh18, Hs3st4, Grik1, Trhde, Dpp6, Sgcd, Pcdh10, Ntrk3, Slc8a3, Pcdh11x, Upp2, Meg3, Samd4, Cntnap2, Tmem132b, Mctp1, Jakmip2, Dner, Cacnb4, Kif26b, D430041D05Rik, Naaladl2, Sgcz, Brinp1, Xkr6, Atp8a2, Stxbp1, Dnajc6, Brinp3, Rps2, Diaph2, Igsf8, Rpsa, Plcl1, Ubc, Ifitm3, Epas1, Cobll1, Rps4x, Actb, Rpl3, Cfl1, Cdc42, Spock2, ENSMUSG00000040904, Rps29, Rps24, B2m, Atp6v0c, Rap1a, R…	1619
GO:0035094	response to nicotine	5	2	0.45	0.06597	0.06597	3dpi	BP	NonN_8	GO:0035094	Atp1a2, B2m	144	Kcnb2, Rbfox3, Cdh18, Hs3st4, Grik1, Trhde, Dpp6, Sgcd, Pcdh10, Ntrk3, Slc8a3, Pcdh11x, Upp2, Meg3, Samd4, Cntnap2, Tmem132b, Mctp1, Jakmip2, Dner, Cacnb4, Kif26b, D430041D05Rik, Naaladl2, Sgcz, Brinp1, Xkr6, Atp8a2, Stxbp1, Dnajc6, Brinp3, Rps2, Diaph2, Igsf8, Rpsa, Plcl1, Ubc, Ifitm3, Epas1, Cobll1, Rps4x, Actb, Rpl3, Cfl1, Cdc42, Spock2, ENSMUSG00000040904, Rps29, Rps24, B2m, Atp6v0c, Rap1a, R…	1619
GO:0042745	circadian sleep/wake cycle	5	2	0.45	0.06597	0.06597	3dpi	BP	NonN_8	GO:0042745	Cntnap2, Ptgds	144	Kcnb2, Rbfox3, Cdh18, Hs3st4, Grik1, Trhde, Dpp6, Sgcd, Pcdh10, Ntrk3, Slc8a3, Pcdh11x, Upp2, Meg3, Samd4, Cntnap2, Tmem132b, Mctp1, Jakmip2, Dner, Cacnb4, Kif26b, D430041D05Rik, Naaladl2, Sgcz, Brinp1, Xkr6, Atp8a2, Stxbp1, Dnajc6, Brinp3, Rps2, Diaph2, Igsf8, Rpsa, Plcl1, Ubc, Ifitm3, Epas1, Cobll1, Rps4x, Actb, Rpl3, Cfl1, Cdc42, Spock2, ENSMUSG00000040904, Rps29, Rps24, B2m, Atp6v0c, Rap1a, R…	1619
GO:0043903	regulation of biological process involve...	5	2	0.45	0.06597	0.06597	3dpi	BP	NonN_8	GO:0043903	Bsg, Ifitm3	144	Kcnb2, Rbfox3, Cdh18, Hs3st4, Grik1, Trhde, Dpp6, Sgcd, Pcdh10, Ntrk3, Slc8a3, Pcdh11x, Upp2, Meg3, Samd4, Cntnap2, Tmem132b, Mctp1, Jakmip2, Dner, Cacnb4, Kif26b, D430041D05Rik, Naaladl2, Sgcz, Brinp1, Xkr6, Atp8a2, Stxbp1, Dnajc6, Brinp3, Rps2, Diaph2, Igsf8, Rpsa, Plcl1, Ubc, Ifitm3, Epas1, Cobll1, Rps4x, Actb, Rpl3, Cfl1, Cdc42, Spock2, ENSMUSG00000040904, Rps29, Rps24, B2m, Atp6v0c, Rap1a, R…	1619
GO:0045724	positive regulation of cilium assembly	5	2	0.45	0.06597	0.06597	3dpi	BP	NonN_8	GO:0045724	Dynll1, Septin7	144	Kcnb2, Rbfox3, Cdh18, Hs3st4, Grik1, Trhde, Dpp6, Sgcd, Pcdh10, Ntrk3, Slc8a3, Pcdh11x, Upp2, Meg3, Samd4, Cntnap2, Tmem132b, Mctp1, Jakmip2, Dner, Cacnb4, Kif26b, D430041D05Rik, Naaladl2, Sgcz, Brinp1, Xkr6, Atp8a2, Stxbp1, Dnajc6, Brinp3, Rps2, Diaph2, Igsf8, Rpsa, Plcl1, Ubc, Ifitm3, Epas1, Cobll1, Rps4x, Actb, Rpl3, Cfl1, Cdc42, Spock2, ENSMUSG00000040904, Rps29, Rps24, B2m, Atp6v0c, Rap1a, R…	1619
GO:0048680	positive regulation of axon regeneration	5	2	0.45	0.06597	0.06597	3dpi	BP	NonN_8	GO:0048680	Ntrk3, Ptn	144	Kcnb2, Rbfox3, Cdh18, Hs3st4, Grik1, Trhde, Dpp6, Sgcd, Pcdh10, Ntrk3, Slc8a3, Pcdh11x, Upp2, Meg3, Samd4, Cntnap2, Tmem132b, Mctp1, Jakmip2, Dner, Cacnb4, Kif26b, D430041D05Rik, Naaladl2, Sgcz, Brinp1, Xkr6, Atp8a2, Stxbp1, Dnajc6, Brinp3, Rps2, Diaph2, Igsf8, Rpsa, Plcl1, Ubc, Ifitm3, Epas1, Cobll1, Rps4x, Actb, Rpl3, Cfl1, Cdc42, Spock2, ENSMUSG00000040904, Rps29, Rps24, B2m, Atp6v0c, Rap1a, R…	1619
GO:0050856	regulation of T cell receptor signaling ...	5	2	0.45	0.06597	0.06597	3dpi	BP	NonN_8	GO:0050856	Cd81, Rps3	144	Kcnb2, Rbfox3, Cdh18, Hs3st4, Grik1, Trhde, Dpp6, Sgcd, Pcdh10, Ntrk3, Slc8a3, Pcdh11x, Upp2, Meg3, Samd4, Cntnap2, Tmem132b, Mctp1, Jakmip2, Dner, Cacnb4, Kif26b, D430041D05Rik, Naaladl2, Sgcz, Brinp1, Xkr6, Atp8a2, Stxbp1, Dnajc6, Brinp3, Rps2, Diaph2, Igsf8, Rpsa, Plcl1, Ubc, Ifitm3, Epas1, Cobll1, Rps4x, Actb, Rpl3, Cfl1, Cdc42, Spock2, ENSMUSG00000040904, Rps29, Rps24, B2m, Atp6v0c, Rap1a, R…	1619
GO:0051053	negative regulation of DNA metabolic pro...	5	2	0.45	0.06597	0.06597	3dpi	BP	NonN_8	GO:0051053	Ndfip1, Rps3	144	Kcnb2, Rbfox3, Cdh18, Hs3st4, Grik1, Trhde, Dpp6, Sgcd, Pcdh10, Ntrk3, Slc8a3, Pcdh11x, Upp2, Meg3, Samd4, Cntnap2, Tmem132b, Mctp1, Jakmip2, Dner, Cacnb4, Kif26b, D430041D05Rik, Naaladl2, Sgcz, Brinp1, Xkr6, Atp8a2, Stxbp1, Dnajc6, Brinp3, Rps2, Diaph2, Igsf8, Rpsa, Plcl1, Ubc, Ifitm3, Epas1, Cobll1, Rps4x, Actb, Rpl3, Cfl1, Cdc42, Spock2, ENSMUSG00000040904, Rps29, Rps24, B2m, Atp6v0c, Rap1a, R…	1619
GO:0070572	positive regulation of neuron projection...	5	2	0.45	0.06597	0.06597	3dpi	BP	NonN_8	GO:0070572	Ntrk3, Ptn	144	Kcnb2, Rbfox3, Cdh18, Hs3st4, Grik1, Trhde, Dpp6, Sgcd, Pcdh10, Ntrk3, Slc8a3, Pcdh11x, Upp2, Meg3, Samd4, Cntnap2, Tmem132b, Mctp1, Jakmip2, Dner, Cacnb4, Kif26b, D430041D05Rik, Naaladl2, Sgcz, Brinp1, Xkr6, Atp8a2, Stxbp1, Dnajc6, Brinp3, Rps2, Diaph2, Igsf8, Rpsa, Plcl1, Ubc, Ifitm3, Epas1, Cobll1, Rps4x, Actb, Rpl3, Cfl1, Cdc42, Spock2, ENSMUSG00000040904, Rps29, Rps24, B2m, Atp6v0c, Rap1a, R…	1619
GO:1901799	negative regulation of proteasomal prote...	5	2	0.45	0.06597	0.06597	3dpi	BP	NonN_8	GO:1901799	Hsp90ab1, Rpl11	144	Kcnb2, Rbfox3, Cdh18, Hs3st4, Grik1, Trhde, Dpp6, Sgcd, Pcdh10, Ntrk3, Slc8a3, Pcdh11x, Upp2, Meg3, Samd4, Cntnap2, Tmem132b, Mctp1, Jakmip2, Dner, Cacnb4, Kif26b, D430041D05Rik, Naaladl2, Sgcz, Brinp1, Xkr6, Atp8a2, Stxbp1, Dnajc6, Brinp3, Rps2, Diaph2, Igsf8, Rpsa, Plcl1, Ubc, Ifitm3, Epas1, Cobll1, Rps4x, Actb, Rpl3, Cfl1, Cdc42, Spock2, ENSMUSG00000040904, Rps29, Rps24, B2m, Atp6v0c, Rap1a, R…	1619
GO:1902855	regulation of non-motile cilium assembly	5	2	0.45	0.06597	0.06597	3dpi	BP	NonN_8	GO:1902855	Dynll1, Septin7	144	Kcnb2, Rbfox3, Cdh18, Hs3st4, Grik1, Trhde, Dpp6, Sgcd, Pcdh10, Ntrk3, Slc8a3, Pcdh11x, Upp2, Meg3, Samd4, Cntnap2, Tmem132b, Mctp1, Jakmip2, Dner, Cacnb4, Kif26b, D430041D05Rik, Naaladl2, Sgcz, Brinp1, Xkr6, Atp8a2, Stxbp1, Dnajc6, Brinp3, Rps2, Diaph2, Igsf8, Rpsa, Plcl1, Ubc, Ifitm3, Epas1, Cobll1, Rps4x, Actb, Rpl3, Cfl1, Cdc42, Spock2, ENSMUSG00000040904, Rps29, Rps24, B2m, Atp6v0c, Rap1a, R…	1619
GO:2000251	positive regulation of actin cytoskeleto...	5	2	0.45	0.06597	0.06597	3dpi	BP	NonN_8	GO:2000251	Cdc42, Ntrk3	144	Kcnb2, Rbfox3, Cdh18, Hs3st4, Grik1, Trhde, Dpp6, Sgcd, Pcdh10, Ntrk3, Slc8a3, Pcdh11x, Upp2, Meg3, Samd4, Cntnap2, Tmem132b, Mctp1, Jakmip2, Dner, Cacnb4, Kif26b, D430041D05Rik, Naaladl2, Sgcz, Brinp1, Xkr6, Atp8a2, Stxbp1, Dnajc6, Brinp3, Rps2, Diaph2, Igsf8, Rpsa, Plcl1, Ubc, Ifitm3, Epas1, Cobll1, Rps4x, Actb, Rpl3, Cfl1, Cdc42, Spock2, ENSMUSG00000040904, Rps29, Rps24, B2m, Atp6v0c, Rap1a, R…	1619
GO:0051348	negative regulation of transferase activ...	33	6	2.94	0.06671	0.06671	3dpi	BP	NonN_8	GO:0051348	Actb, Gstp1, Ppia, Rpl11, Rpl23, Slc8a3	144	Kcnb2, Rbfox3, Cdh18, Hs3st4, Grik1, Trhde, Dpp6, Sgcd, Pcdh10, Ntrk3, Slc8a3, Pcdh11x, Upp2, Meg3, Samd4, Cntnap2, Tmem132b, Mctp1, Jakmip2, Dner, Cacnb4, Kif26b, D430041D05Rik, Naaladl2, Sgcz, Brinp1, Xkr6, Atp8a2, Stxbp1, Dnajc6, Brinp3, Rps2, Diaph2, Igsf8, Rpsa, Plcl1, Ubc, Ifitm3, Epas1, Cobll1, Rps4x, Actb, Rpl3, Cfl1, Cdc42, Spock2, ENSMUSG00000040904, Rps29, Rps24, B2m, Atp6v0c, Rap1a, R…	1619
GO:0019079	viral genome replication	11	3	0.98	0.06722	0.06722	3dpi	BP	NonN_8	GO:0019079	Cdc42, Ifitm3, Ppia	144	Kcnb2, Rbfox3, Cdh18, Hs3st4, Grik1, Trhde, Dpp6, Sgcd, Pcdh10, Ntrk3, Slc8a3, Pcdh11x, Upp2, Meg3, Samd4, Cntnap2, Tmem132b, Mctp1, Jakmip2, Dner, Cacnb4, Kif26b, D430041D05Rik, Naaladl2, Sgcz, Brinp1, Xkr6, Atp8a2, Stxbp1, Dnajc6, Brinp3, Rps2, Diaph2, Igsf8, Rpsa, Plcl1, Ubc, Ifitm3, Epas1, Cobll1, Rps4x, Actb, Rpl3, Cfl1, Cdc42, Spock2, ENSMUSG00000040904, Rps29, Rps24, B2m, Atp6v0c, Rap1a, R…	1619
GO:0021872	forebrain generation of neurons	11	3	0.98	0.06722	0.06722	3dpi	BP	NonN_8	GO:0021872	B2m, Ubb, Uqcrq	144	Kcnb2, Rbfox3, Cdh18, Hs3st4, Grik1, Trhde, Dpp6, Sgcd, Pcdh10, Ntrk3, Slc8a3, Pcdh11x, Upp2, Meg3, Samd4, Cntnap2, Tmem132b, Mctp1, Jakmip2, Dner, Cacnb4, Kif26b, D430041D05Rik, Naaladl2, Sgcz, Brinp1, Xkr6, Atp8a2, Stxbp1, Dnajc6, Brinp3, Rps2, Diaph2, Igsf8, Rpsa, Plcl1, Ubc, Ifitm3, Epas1, Cobll1, Rps4x, Actb, Rpl3, Cfl1, Cdc42, Spock2, ENSMUSG00000040904, Rps29, Rps24, B2m, Atp6v0c, Rap1a, R…	1619
GO:0032228	regulation of synaptic transmission, GAB...	11	3	0.98	0.06722	0.06722	3dpi	BP	NonN_8	GO:0032228	Grik1, Plcl1, Stxbp1	144	Kcnb2, Rbfox3, Cdh18, Hs3st4, Grik1, Trhde, Dpp6, Sgcd, Pcdh10, Ntrk3, Slc8a3, Pcdh11x, Upp2, Meg3, Samd4, Cntnap2, Tmem132b, Mctp1, Jakmip2, Dner, Cacnb4, Kif26b, D430041D05Rik, Naaladl2, Sgcz, Brinp1, Xkr6, Atp8a2, Stxbp1, Dnajc6, Brinp3, Rps2, Diaph2, Igsf8, Rpsa, Plcl1, Ubc, Ifitm3, Epas1, Cobll1, Rps4x, Actb, Rpl3, Cfl1, Cdc42, Spock2, ENSMUSG00000040904, Rps29, Rps24, B2m, Atp6v0c, Rap1a, R…	1619
GO:0038061	NIK/NF-kappaB signaling	11	3	0.98	0.06722	0.06722	3dpi	BP	NonN_8	GO:0038061	Ndufc2, Prdx1, Rps3	144	Kcnb2, Rbfox3, Cdh18, Hs3st4, Grik1, Trhde, Dpp6, Sgcd, Pcdh10, Ntrk3, Slc8a3, Pcdh11x, Upp2, Meg3, Samd4, Cntnap2, Tmem132b, Mctp1, Jakmip2, Dner, Cacnb4, Kif26b, D430041D05Rik, Naaladl2, Sgcz, Brinp1, Xkr6, Atp8a2, Stxbp1, Dnajc6, Brinp3, Rps2, Diaph2, Igsf8, Rpsa, Plcl1, Ubc, Ifitm3, Epas1, Cobll1, Rps4x, Actb, Rpl3, Cfl1, Cdc42, Spock2, ENSMUSG00000040904, Rps29, Rps24, B2m, Atp6v0c, Rap1a, R…	1619
GO:0050792	regulation of viral process	11	3	0.98	0.06722	0.06722	3dpi	BP	NonN_8	GO:0050792	Bsg, Ifitm3, Ppia	144	Kcnb2, Rbfox3, Cdh18, Hs3st4, Grik1, Trhde, Dpp6, Sgcd, Pcdh10, Ntrk3, Slc8a3, Pcdh11x, Upp2, Meg3, Samd4, Cntnap2, Tmem132b, Mctp1, Jakmip2, Dner, Cacnb4, Kif26b, D430041D05Rik, Naaladl2, Sgcz, Brinp1, Xkr6, Atp8a2, Stxbp1, Dnajc6, Brinp3, Rps2, Diaph2, Igsf8, Rpsa, Plcl1, Ubc, Ifitm3, Epas1, Cobll1, Rps4x, Actb, Rpl3, Cfl1, Cdc42, Spock2, ENSMUSG00000040904, Rps29, Rps24, B2m, Atp6v0c, Rap1a, R…	1619
GO:0051092	positive regulation of NF-kappaB transcr...	11	3	0.98	0.06722	0.06722	3dpi	BP	NonN_8	GO:0051092	Ppia, Ptma, Rps3	144	Kcnb2, Rbfox3, Cdh18, Hs3st4, Grik1, Trhde, Dpp6, Sgcd, Pcdh10, Ntrk3, Slc8a3, Pcdh11x, Upp2, Meg3, Samd4, Cntnap2, Tmem132b, Mctp1, Jakmip2, Dner, Cacnb4, Kif26b, D430041D05Rik, Naaladl2, Sgcz, Brinp1, Xkr6, Atp8a2, Stxbp1, Dnajc6, Brinp3, Rps2, Diaph2, Igsf8, Rpsa, Plcl1, Ubc, Ifitm3, Epas1, Cobll1, Rps4x, Actb, Rpl3, Cfl1, Cdc42, Spock2, ENSMUSG00000040904, Rps29, Rps24, B2m, Atp6v0c, Rap1a, R…	1619
GO:0051341	regulation of oxidoreductase activity	11	3	0.98	0.06722	0.06722	3dpi	BP	NonN_8	GO:0051341	Calm1, Gstp1, Ndufa4	144	Kcnb2, Rbfox3, Cdh18, Hs3st4, Grik1, Trhde, Dpp6, Sgcd, Pcdh10, Ntrk3, Slc8a3, Pcdh11x, Upp2, Meg3, Samd4, Cntnap2, Tmem132b, Mctp1, Jakmip2, Dner, Cacnb4, Kif26b, D430041D05Rik, Naaladl2, Sgcz, Brinp1, Xkr6, Atp8a2, Stxbp1, Dnajc6, Brinp3, Rps2, Diaph2, Igsf8, Rpsa, Plcl1, Ubc, Ifitm3, Epas1, Cobll1, Rps4x, Actb, Rpl3, Cfl1, Cdc42, Spock2, ENSMUSG00000040904, Rps29, Rps24, B2m, Atp6v0c, Rap1a, R…	1619
GO:0016567	protein ubiquitination	67	10	5.97	0.06807	0.82934	3dpi	BP	NonN_8	GO:0016567	Hsp90ab1, Ndfip1, Ppia, Rpl11, Rpl23, Rps2, Rps27a, Rps3, Ubb, Ubc	144	Kcnb2, Rbfox3, Cdh18, Hs3st4, Grik1, Trhde, Dpp6, Sgcd, Pcdh10, Ntrk3, Slc8a3, Pcdh11x, Upp2, Meg3, Samd4, Cntnap2, Tmem132b, Mctp1, Jakmip2, Dner, Cacnb4, Kif26b, D430041D05Rik, Naaladl2, Sgcz, Brinp1, Xkr6, Atp8a2, Stxbp1, Dnajc6, Brinp3, Rps2, Diaph2, Igsf8, Rpsa, Plcl1, Ubc, Ifitm3, Epas1, Cobll1, Rps4x, Actb, Rpl3, Cfl1, Cdc42, Spock2, ENSMUSG00000040904, Rps29, Rps24, B2m, Atp6v0c, Rap1a, R…	1619
GO:0071345	cellular response to cytokine stimulus	67	10	5.97	0.06807	0.06807	3dpi	BP	NonN_8	GO:0071345	Cacnb4, Cdc42, Cfl1, Hsp90ab1, Ifitm3, Rpl3, Rps2, Rps3, Spock2, Stxbp1	144	Kcnb2, Rbfox3, Cdh18, Hs3st4, Grik1, Trhde, Dpp6, Sgcd, Pcdh10, Ntrk3, Slc8a3, Pcdh11x, Upp2, Meg3, Samd4, Cntnap2, Tmem132b, Mctp1, Jakmip2, Dner, Cacnb4, Kif26b, D430041D05Rik, Naaladl2, Sgcz, Brinp1, Xkr6, Atp8a2, Stxbp1, Dnajc6, Brinp3, Rps2, Diaph2, Igsf8, Rpsa, Plcl1, Ubc, Ifitm3, Epas1, Cobll1, Rps4x, Actb, Rpl3, Cfl1, Cdc42, Spock2, ENSMUSG00000040904, Rps29, Rps24, B2m, Atp6v0c, Rap1a, R…	1619
GO:0006457	protein folding	18	4	1.61	0.06914	0.06914	3dpi	BP	NonN_8	GO:0006457	B2m, Hsp90ab1, Pfdn5, Ppia	144	Kcnb2, Rbfox3, Cdh18, Hs3st4, Grik1, Trhde, Dpp6, Sgcd, Pcdh10, Ntrk3, Slc8a3, Pcdh11x, Upp2, Meg3, Samd4, Cntnap2, Tmem132b, Mctp1, Jakmip2, Dner, Cacnb4, Kif26b, D430041D05Rik, Naaladl2, Sgcz, Brinp1, Xkr6, Atp8a2, Stxbp1, Dnajc6, Brinp3, Rps2, Diaph2, Igsf8, Rpsa, Plcl1, Ubc, Ifitm3, Epas1, Cobll1, Rps4x, Actb, Rpl3, Cfl1, Cdc42, Spock2, ENSMUSG00000040904, Rps29, Rps24, B2m, Atp6v0c, Rap1a, R…	1619
GO:0009199	ribonucleoside triphosphate metabolic pr...	18	4	1.61	0.06914	0.06914	3dpi	BP	NonN_8	GO:0009199	Aldoa, Atp5j, Atp5j2, Ndufc2	144	Kcnb2, Rbfox3, Cdh18, Hs3st4, Grik1, Trhde, Dpp6, Sgcd, Pcdh10, Ntrk3, Slc8a3, Pcdh11x, Upp2, Meg3, Samd4, Cntnap2, Tmem132b, Mctp1, Jakmip2, Dner, Cacnb4, Kif26b, D430041D05Rik, Naaladl2, Sgcz, Brinp1, Xkr6, Atp8a2, Stxbp1, Dnajc6, Brinp3, Rps2, Diaph2, Igsf8, Rpsa, Plcl1, Ubc, Ifitm3, Epas1, Cobll1, Rps4x, Actb, Rpl3, Cfl1, Cdc42, Spock2, ENSMUSG00000040904, Rps29, Rps24, B2m, Atp6v0c, Rap1a, R…	1619
GO:0009205	purine ribonucleoside triphosphate metab...	18	4	1.61	0.06914	0.06914	3dpi	BP	NonN_8	GO:0009205	Aldoa, Atp5j, Atp5j2, Ndufc2	144	Kcnb2, Rbfox3, Cdh18, Hs3st4, Grik1, Trhde, Dpp6, Sgcd, Pcdh10, Ntrk3, Slc8a3, Pcdh11x, Upp2, Meg3, Samd4, Cntnap2, Tmem132b, Mctp1, Jakmip2, Dner, Cacnb4, Kif26b, D430041D05Rik, Naaladl2, Sgcz, Brinp1, Xkr6, Atp8a2, Stxbp1, Dnajc6, Brinp3, Rps2, Diaph2, Igsf8, Rpsa, Plcl1, Ubc, Ifitm3, Epas1, Cobll1, Rps4x, Actb, Rpl3, Cfl1, Cdc42, Spock2, ENSMUSG00000040904, Rps29, Rps24, B2m, Atp6v0c, Rap1a, R…	1619
GO:0032410	negative regulation of transporter activ...	18	4	1.61	0.06914	0.06914	3dpi	BP	NonN_8	GO:0032410	Atp1a2, Calm1, Calm2, Ndfip1	144	Kcnb2, Rbfox3, Cdh18, Hs3st4, Grik1, Trhde, Dpp6, Sgcd, Pcdh10, Ntrk3, Slc8a3, Pcdh11x, Upp2, Meg3, Samd4, Cntnap2, Tmem132b, Mctp1, Jakmip2, Dner, Cacnb4, Kif26b, D430041D05Rik, Naaladl2, Sgcz, Brinp1, Xkr6, Atp8a2, Stxbp1, Dnajc6, Brinp3, Rps2, Diaph2, Igsf8, Rpsa, Plcl1, Ubc, Ifitm3, Epas1, Cobll1, Rps4x, Actb, Rpl3, Cfl1, Cdc42, Spock2, ENSMUSG00000040904, Rps29, Rps24, B2m, Atp6v0c, Rap1a, R…	1619
GO:0035304	regulation of protein dephosphorylation	18	4	1.61	0.06914	0.69730	3dpi	BP	NonN_8	GO:0035304	Calm1, Calm2, Hsp90ab1, Ppia	144	Kcnb2, Rbfox3, Cdh18, Hs3st4, Grik1, Trhde, Dpp6, Sgcd, Pcdh10, Ntrk3, Slc8a3, Pcdh11x, Upp2, Meg3, Samd4, Cntnap2, Tmem132b, Mctp1, Jakmip2, Dner, Cacnb4, Kif26b, D430041D05Rik, Naaladl2, Sgcz, Brinp1, Xkr6, Atp8a2, Stxbp1, Dnajc6, Brinp3, Rps2, Diaph2, Igsf8, Rpsa, Plcl1, Ubc, Ifitm3, Epas1, Cobll1, Rps4x, Actb, Rpl3, Cfl1, Cdc42, Spock2, ENSMUSG00000040904, Rps29, Rps24, B2m, Atp6v0c, Rap1a, R…	1619
GO:0019693	ribose phosphate metabolic process	42	7	3.75	0.07341	0.07341	3dpi	BP	NonN_8	GO:0019693	Aldoa, Atp5j, Atp5j2, Cacnb4, Hint1, Ndufc2, Upp2	144	Kcnb2, Rbfox3, Cdh18, Hs3st4, Grik1, Trhde, Dpp6, Sgcd, Pcdh10, Ntrk3, Slc8a3, Pcdh11x, Upp2, Meg3, Samd4, Cntnap2, Tmem132b, Mctp1, Jakmip2, Dner, Cacnb4, Kif26b, D430041D05Rik, Naaladl2, Sgcz, Brinp1, Xkr6, Atp8a2, Stxbp1, Dnajc6, Brinp3, Rps2, Diaph2, Igsf8, Rpsa, Plcl1, Ubc, Ifitm3, Epas1, Cobll1, Rps4x, Actb, Rpl3, Cfl1, Cdc42, Spock2, ENSMUSG00000040904, Rps29, Rps24, B2m, Atp6v0c, Rap1a, R…	1619
GO:0002443	leukocyte mediated immunity	34	6	3.03	0.07530	0.07530	3dpi	BP	NonN_8	GO:0002443	B2m, Cd81, Ndfip1, Prdx1, Ptgds, Stxbp1	144	Kcnb2, Rbfox3, Cdh18, Hs3st4, Grik1, Trhde, Dpp6, Sgcd, Pcdh10, Ntrk3, Slc8a3, Pcdh11x, Upp2, Meg3, Samd4, Cntnap2, Tmem132b, Mctp1, Jakmip2, Dner, Cacnb4, Kif26b, D430041D05Rik, Naaladl2, Sgcz, Brinp1, Xkr6, Atp8a2, Stxbp1, Dnajc6, Brinp3, Rps2, Diaph2, Igsf8, Rpsa, Plcl1, Ubc, Ifitm3, Epas1, Cobll1, Rps4x, Actb, Rpl3, Cfl1, Cdc42, Spock2, ENSMUSG00000040904, Rps29, Rps24, B2m, Atp6v0c, Rap1a, R…	1619
GO:0034599	cellular response to oxidative stress	34	6	3.03	0.07530	0.07530	3dpi	BP	NonN_8	GO:0034599	Cfl1, Chchd2, Epas1, Ppia, Prdx1, Rps3	144	Kcnb2, Rbfox3, Cdh18, Hs3st4, Grik1, Trhde, Dpp6, Sgcd, Pcdh10, Ntrk3, Slc8a3, Pcdh11x, Upp2, Meg3, Samd4, Cntnap2, Tmem132b, Mctp1, Jakmip2, Dner, Cacnb4, Kif26b, D430041D05Rik, Naaladl2, Sgcz, Brinp1, Xkr6, Atp8a2, Stxbp1, Dnajc6, Brinp3, Rps2, Diaph2, Igsf8, Rpsa, Plcl1, Ubc, Ifitm3, Epas1, Cobll1, Rps4x, Actb, Rpl3, Cfl1, Cdc42, Spock2, ENSMUSG00000040904, Rps29, Rps24, B2m, Atp6v0c, Rap1a, R…	1619
GO:0034097	response to cytokine	78	11	6.96	0.07993	0.07993	3dpi	BP	NonN_8	GO:0034097	Cacnb4, Cdc42, Cfl1, Cntnap2, Hsp90ab1, Ifitm3, Rpl3, Rps2, Rps3, Spock2, Stxbp1	144	Kcnb2, Rbfox3, Cdh18, Hs3st4, Grik1, Trhde, Dpp6, Sgcd, Pcdh10, Ntrk3, Slc8a3, Pcdh11x, Upp2, Meg3, Samd4, Cntnap2, Tmem132b, Mctp1, Jakmip2, Dner, Cacnb4, Kif26b, D430041D05Rik, Naaladl2, Sgcz, Brinp1, Xkr6, Atp8a2, Stxbp1, Dnajc6, Brinp3, Rps2, Diaph2, Igsf8, Rpsa, Plcl1, Ubc, Ifitm3, Epas1, Cobll1, Rps4x, Actb, Rpl3, Cfl1, Cdc42, Spock2, ENSMUSG00000040904, Rps29, Rps24, B2m, Atp6v0c, Rap1a, R…	1619
GO:0051098	regulation of binding	43	7	3.83	0.08142	0.08142	3dpi	BP	NonN_8	GO:0051098	Actb, B2m, Calm1, Cdc42, Hsp90ab1, Plcl1, Rpl11	144	Kcnb2, Rbfox3, Cdh18, Hs3st4, Grik1, Trhde, Dpp6, Sgcd, Pcdh10, Ntrk3, Slc8a3, Pcdh11x, Upp2, Meg3, Samd4, Cntnap2, Tmem132b, Mctp1, Jakmip2, Dner, Cacnb4, Kif26b, D430041D05Rik, Naaladl2, Sgcz, Brinp1, Xkr6, Atp8a2, Stxbp1, Dnajc6, Brinp3, Rps2, Diaph2, Igsf8, Rpsa, Plcl1, Ubc, Ifitm3, Epas1, Cobll1, Rps4x, Actb, Rpl3, Cfl1, Cdc42, Spock2, ENSMUSG00000040904, Rps29, Rps24, B2m, Atp6v0c, Rap1a, R…	1619
GO:0009141	nucleoside triphosphate metabolic proces...	19	4	1.69	0.08175	0.08175	3dpi	BP	NonN_8	GO:0009141	Aldoa, Atp5j, Atp5j2, Ndufc2	144	Kcnb2, Rbfox3, Cdh18, Hs3st4, Grik1, Trhde, Dpp6, Sgcd, Pcdh10, Ntrk3, Slc8a3, Pcdh11x, Upp2, Meg3, Samd4, Cntnap2, Tmem132b, Mctp1, Jakmip2, Dner, Cacnb4, Kif26b, D430041D05Rik, Naaladl2, Sgcz, Brinp1, Xkr6, Atp8a2, Stxbp1, Dnajc6, Brinp3, Rps2, Diaph2, Igsf8, Rpsa, Plcl1, Ubc, Ifitm3, Epas1, Cobll1, Rps4x, Actb, Rpl3, Cfl1, Cdc42, Spock2, ENSMUSG00000040904, Rps29, Rps24, B2m, Atp6v0c, Rap1a, R…	1619
GO:0009144	purine nucleoside triphosphate metabolic...	19	4	1.69	0.08175	0.08175	3dpi	BP	NonN_8	GO:0009144	Aldoa, Atp5j, Atp5j2, Ndufc2	144	Kcnb2, Rbfox3, Cdh18, Hs3st4, Grik1, Trhde, Dpp6, Sgcd, Pcdh10, Ntrk3, Slc8a3, Pcdh11x, Upp2, Meg3, Samd4, Cntnap2, Tmem132b, Mctp1, Jakmip2, Dner, Cacnb4, Kif26b, D430041D05Rik, Naaladl2, Sgcz, Brinp1, Xkr6, Atp8a2, Stxbp1, Dnajc6, Brinp3, Rps2, Diaph2, Igsf8, Rpsa, Plcl1, Ubc, Ifitm3, Epas1, Cobll1, Rps4x, Actb, Rpl3, Cfl1, Cdc42, Spock2, ENSMUSG00000040904, Rps29, Rps24, B2m, Atp6v0c, Rap1a, R…	1619
GO:0021761	limbic system development	19	4	1.69	0.08175	0.08175	3dpi	BP	NonN_8	GO:0021761	Atp1a2, Cntnap2, Ubb, Uqcrq	144	Kcnb2, Rbfox3, Cdh18, Hs3st4, Grik1, Trhde, Dpp6, Sgcd, Pcdh10, Ntrk3, Slc8a3, Pcdh11x, Upp2, Meg3, Samd4, Cntnap2, Tmem132b, Mctp1, Jakmip2, Dner, Cacnb4, Kif26b, D430041D05Rik, Naaladl2, Sgcz, Brinp1, Xkr6, Atp8a2, Stxbp1, Dnajc6, Brinp3, Rps2, Diaph2, Igsf8, Rpsa, Plcl1, Ubc, Ifitm3, Epas1, Cobll1, Rps4x, Actb, Rpl3, Cfl1, Cdc42, Spock2, ENSMUSG00000040904, Rps29, Rps24, B2m, Atp6v0c, Rap1a, R…	1619
GO:0044403	biological process involved in symbiotic...	19	4	1.69	0.08175	0.08175	3dpi	BP	NonN_8	GO:0044403	Bsg, Cfl1, Hsp90ab1, Ifitm3	144	Kcnb2, Rbfox3, Cdh18, Hs3st4, Grik1, Trhde, Dpp6, Sgcd, Pcdh10, Ntrk3, Slc8a3, Pcdh11x, Upp2, Meg3, Samd4, Cntnap2, Tmem132b, Mctp1, Jakmip2, Dner, Cacnb4, Kif26b, D430041D05Rik, Naaladl2, Sgcz, Brinp1, Xkr6, Atp8a2, Stxbp1, Dnajc6, Brinp3, Rps2, Diaph2, Igsf8, Rpsa, Plcl1, Ubc, Ifitm3, Epas1, Cobll1, Rps4x, Actb, Rpl3, Cfl1, Cdc42, Spock2, ENSMUSG00000040904, Rps29, Rps24, B2m, Atp6v0c, Rap1a, R…	1619
GO:0051302	regulation of cell division	19	4	1.69	0.08175	0.08175	3dpi	BP	NonN_8	GO:0051302	Calm1, Calm2, Cdc42, Ptn	144	Kcnb2, Rbfox3, Cdh18, Hs3st4, Grik1, Trhde, Dpp6, Sgcd, Pcdh10, Ntrk3, Slc8a3, Pcdh11x, Upp2, Meg3, Samd4, Cntnap2, Tmem132b, Mctp1, Jakmip2, Dner, Cacnb4, Kif26b, D430041D05Rik, Naaladl2, Sgcz, Brinp1, Xkr6, Atp8a2, Stxbp1, Dnajc6, Brinp3, Rps2, Diaph2, Igsf8, Rpsa, Plcl1, Ubc, Ifitm3, Epas1, Cobll1, Rps4x, Actb, Rpl3, Cfl1, Cdc42, Spock2, ENSMUSG00000040904, Rps29, Rps24, B2m, Atp6v0c, Rap1a, R…	1619
GO:0098771	inorganic ion homeostasis	97	13	8.65	0.08315	0.34367	3dpi	BP	NonN_8	GO:0098771	Atp1a2, Atp6v0c, B2m, Cacnb4, Calm1, Calm2, Ckb, Epas1, Ftl1, Mt1, Ndfip1, Sgcd, Slc8a3	144	Kcnb2, Rbfox3, Cdh18, Hs3st4, Grik1, Trhde, Dpp6, Sgcd, Pcdh10, Ntrk3, Slc8a3, Pcdh11x, Upp2, Meg3, Samd4, Cntnap2, Tmem132b, Mctp1, Jakmip2, Dner, Cacnb4, Kif26b, D430041D05Rik, Naaladl2, Sgcz, Brinp1, Xkr6, Atp8a2, Stxbp1, Dnajc6, Brinp3, Rps2, Diaph2, Igsf8, Rpsa, Plcl1, Ubc, Ifitm3, Epas1, Cobll1, Rps4x, Actb, Rpl3, Cfl1, Cdc42, Spock2, ENSMUSG00000040904, Rps29, Rps24, B2m, Atp6v0c, Rap1a, R…	1619
GO:0003407	neural retina development	12	3	1.07	0.08396	0.08396	3dpi	BP	NonN_8	GO:0003407	Atp8a2, Bsg, Ptn	144	Kcnb2, Rbfox3, Cdh18, Hs3st4, Grik1, Trhde, Dpp6, Sgcd, Pcdh10, Ntrk3, Slc8a3, Pcdh11x, Upp2, Meg3, Samd4, Cntnap2, Tmem132b, Mctp1, Jakmip2, Dner, Cacnb4, Kif26b, D430041D05Rik, Naaladl2, Sgcz, Brinp1, Xkr6, Atp8a2, Stxbp1, Dnajc6, Brinp3, Rps2, Diaph2, Igsf8, Rpsa, Plcl1, Ubc, Ifitm3, Epas1, Cobll1, Rps4x, Actb, Rpl3, Cfl1, Cdc42, Spock2, ENSMUSG00000040904, Rps29, Rps24, B2m, Atp6v0c, Rap1a, R…	1619
GO:0007338	single fertilization	12	3	1.07	0.08396	0.08396	3dpi	BP	NonN_8	GO:0007338	Aldoa, H3f3b, Stxbp1	144	Kcnb2, Rbfox3, Cdh18, Hs3st4, Grik1, Trhde, Dpp6, Sgcd, Pcdh10, Ntrk3, Slc8a3, Pcdh11x, Upp2, Meg3, Samd4, Cntnap2, Tmem132b, Mctp1, Jakmip2, Dner, Cacnb4, Kif26b, D430041D05Rik, Naaladl2, Sgcz, Brinp1, Xkr6, Atp8a2, Stxbp1, Dnajc6, Brinp3, Rps2, Diaph2, Igsf8, Rpsa, Plcl1, Ubc, Ifitm3, Epas1, Cobll1, Rps4x, Actb, Rpl3, Cfl1, Cdc42, Spock2, ENSMUSG00000040904, Rps29, Rps24, B2m, Atp6v0c, Rap1a, R…	1619
GO:0015914	phospholipid transport	12	3	1.07	0.08396	0.08396	3dpi	BP	NonN_8	GO:0015914	Atp8a2, Pltp, Xkr6	144	Kcnb2, Rbfox3, Cdh18, Hs3st4, Grik1, Trhde, Dpp6, Sgcd, Pcdh10, Ntrk3, Slc8a3, Pcdh11x, Upp2, Meg3, Samd4, Cntnap2, Tmem132b, Mctp1, Jakmip2, Dner, Cacnb4, Kif26b, D430041D05Rik, Naaladl2, Sgcz, Brinp1, Xkr6, Atp8a2, Stxbp1, Dnajc6, Brinp3, Rps2, Diaph2, Igsf8, Rpsa, Plcl1, Ubc, Ifitm3, Epas1, Cobll1, Rps4x, Actb, Rpl3, Cfl1, Cdc42, Spock2, ENSMUSG00000040904, Rps29, Rps24, B2m, Atp6v0c, Rap1a, R…	1619
GO:0043467	regulation of generation of precursor me...	12	3	1.07	0.08396	0.08396	3dpi	BP	NonN_8	GO:0043467	Chchd2, Cox7a2, Ndufa4	144	Kcnb2, Rbfox3, Cdh18, Hs3st4, Grik1, Trhde, Dpp6, Sgcd, Pcdh10, Ntrk3, Slc8a3, Pcdh11x, Upp2, Meg3, Samd4, Cntnap2, Tmem132b, Mctp1, Jakmip2, Dner, Cacnb4, Kif26b, D430041D05Rik, Naaladl2, Sgcz, Brinp1, Xkr6, Atp8a2, Stxbp1, Dnajc6, Brinp3, Rps2, Diaph2, Igsf8, Rpsa, Plcl1, Ubc, Ifitm3, Epas1, Cobll1, Rps4x, Actb, Rpl3, Cfl1, Cdc42, Spock2, ENSMUSG00000040904, Rps29, Rps24, B2m, Atp6v0c, Rap1a, R…	1619
GO:0140115	export across plasma membrane	12	3	1.07	0.08396	0.08396	3dpi	BP	NonN_8	GO:0140115	Atp1a2, Calm2, Slc8a3	144	Kcnb2, Rbfox3, Cdh18, Hs3st4, Grik1, Trhde, Dpp6, Sgcd, Pcdh10, Ntrk3, Slc8a3, Pcdh11x, Upp2, Meg3, Samd4, Cntnap2, Tmem132b, Mctp1, Jakmip2, Dner, Cacnb4, Kif26b, D430041D05Rik, Naaladl2, Sgcz, Brinp1, Xkr6, Atp8a2, Stxbp1, Dnajc6, Brinp3, Rps2, Diaph2, Igsf8, Rpsa, Plcl1, Ubc, Ifitm3, Epas1, Cobll1, Rps4x, Actb, Rpl3, Cfl1, Cdc42, Spock2, ENSMUSG00000040904, Rps29, Rps24, B2m, Atp6v0c, Rap1a, R…	1619
GO:1901021	positive regulation of calcium ion trans...	12	3	1.07	0.08396	0.08396	3dpi	BP	NonN_8	GO:1901021	Cacnb4, Calm1, Calm2	144	Kcnb2, Rbfox3, Cdh18, Hs3st4, Grik1, Trhde, Dpp6, Sgcd, Pcdh10, Ntrk3, Slc8a3, Pcdh11x, Upp2, Meg3, Samd4, Cntnap2, Tmem132b, Mctp1, Jakmip2, Dner, Cacnb4, Kif26b, D430041D05Rik, Naaladl2, Sgcz, Brinp1, Xkr6, Atp8a2, Stxbp1, Dnajc6, Brinp3, Rps2, Diaph2, Igsf8, Rpsa, Plcl1, Ubc, Ifitm3, Epas1, Cobll1, Rps4x, Actb, Rpl3, Cfl1, Cdc42, Spock2, ENSMUSG00000040904, Rps29, Rps24, B2m, Atp6v0c, Rap1a, R…	1619
GO:0006753	nucleoside phosphate metabolic process	44	7	3.92	0.08992	0.08992	3dpi	BP	NonN_8	GO:0006753	Aldoa, Atp5j, Atp5j2, Cacnb4, Hint1, Ndufc2, Upp2	144	Kcnb2, Rbfox3, Cdh18, Hs3st4, Grik1, Trhde, Dpp6, Sgcd, Pcdh10, Ntrk3, Slc8a3, Pcdh11x, Upp2, Meg3, Samd4, Cntnap2, Tmem132b, Mctp1, Jakmip2, Dner, Cacnb4, Kif26b, D430041D05Rik, Naaladl2, Sgcz, Brinp1, Xkr6, Atp8a2, Stxbp1, Dnajc6, Brinp3, Rps2, Diaph2, Igsf8, Rpsa, Plcl1, Ubc, Ifitm3, Epas1, Cobll1, Rps4x, Actb, Rpl3, Cfl1, Cdc42, Spock2, ENSMUSG00000040904, Rps29, Rps24, B2m, Atp6v0c, Rap1a, R…	1619
GO:0009117	nucleotide metabolic process	44	7	3.92	0.08992	0.08992	3dpi	BP	NonN_8	GO:0009117	Aldoa, Atp5j, Atp5j2, Cacnb4, Hint1, Ndufc2, Upp2	144	Kcnb2, Rbfox3, Cdh18, Hs3st4, Grik1, Trhde, Dpp6, Sgcd, Pcdh10, Ntrk3, Slc8a3, Pcdh11x, Upp2, Meg3, Samd4, Cntnap2, Tmem132b, Mctp1, Jakmip2, Dner, Cacnb4, Kif26b, D430041D05Rik, Naaladl2, Sgcz, Brinp1, Xkr6, Atp8a2, Stxbp1, Dnajc6, Brinp3, Rps2, Diaph2, Igsf8, Rpsa, Plcl1, Ubc, Ifitm3, Epas1, Cobll1, Rps4x, Actb, Rpl3, Cfl1, Cdc42, Spock2, ENSMUSG00000040904, Rps29, Rps24, B2m, Atp6v0c, Rap1a, R…	1619
GO:0002279	mast cell activation involved in immune ...	6	2	0.54	0.09328	0.09328	3dpi	BP	NonN_8	GO:0002279	Ptgds, Stxbp1	144	Kcnb2, Rbfox3, Cdh18, Hs3st4, Grik1, Trhde, Dpp6, Sgcd, Pcdh10, Ntrk3, Slc8a3, Pcdh11x, Upp2, Meg3, Samd4, Cntnap2, Tmem132b, Mctp1, Jakmip2, Dner, Cacnb4, Kif26b, D430041D05Rik, Naaladl2, Sgcz, Brinp1, Xkr6, Atp8a2, Stxbp1, Dnajc6, Brinp3, Rps2, Diaph2, Igsf8, Rpsa, Plcl1, Ubc, Ifitm3, Epas1, Cobll1, Rps4x, Actb, Rpl3, Cfl1, Cdc42, Spock2, ENSMUSG00000040904, Rps29, Rps24, B2m, Atp6v0c, Rap1a, R…	1619
GO:0002381	immunoglobulin production involved in im...	6	2	0.54	0.09328	0.09328	3dpi	BP	NonN_8	GO:0002381	B2m, Ndfip1	144	Kcnb2, Rbfox3, Cdh18, Hs3st4, Grik1, Trhde, Dpp6, Sgcd, Pcdh10, Ntrk3, Slc8a3, Pcdh11x, Upp2, Meg3, Samd4, Cntnap2, Tmem132b, Mctp1, Jakmip2, Dner, Cacnb4, Kif26b, D430041D05Rik, Naaladl2, Sgcz, Brinp1, Xkr6, Atp8a2, Stxbp1, Dnajc6, Brinp3, Rps2, Diaph2, Igsf8, Rpsa, Plcl1, Ubc, Ifitm3, Epas1, Cobll1, Rps4x, Actb, Rpl3, Cfl1, Cdc42, Spock2, ENSMUSG00000040904, Rps29, Rps24, B2m, Atp6v0c, Rap1a, R…	1619
GO:0002448	mast cell mediated immunity	6	2	0.54	0.09328	0.09328	3dpi	BP	NonN_8	GO:0002448	Ptgds, Stxbp1	144	Kcnb2, Rbfox3, Cdh18, Hs3st4, Grik1, Trhde, Dpp6, Sgcd, Pcdh10, Ntrk3, Slc8a3, Pcdh11x, Upp2, Meg3, Samd4, Cntnap2, Tmem132b, Mctp1, Jakmip2, Dner, Cacnb4, Kif26b, D430041D05Rik, Naaladl2, Sgcz, Brinp1, Xkr6, Atp8a2, Stxbp1, Dnajc6, Brinp3, Rps2, Diaph2, Igsf8, Rpsa, Plcl1, Ubc, Ifitm3, Epas1, Cobll1, Rps4x, Actb, Rpl3, Cfl1, Cdc42, Spock2, ENSMUSG00000040904, Rps29, Rps24, B2m, Atp6v0c, Rap1a, R…	1619
GO:0006275	regulation of DNA replication	6	2	0.54	0.09328	0.09328	3dpi	BP	NonN_8	GO:0006275	Cdc42, Cst3	144	Kcnb2, Rbfox3, Cdh18, Hs3st4, Grik1, Trhde, Dpp6, Sgcd, Pcdh10, Ntrk3, Slc8a3, Pcdh11x, Upp2, Meg3, Samd4, Cntnap2, Tmem132b, Mctp1, Jakmip2, Dner, Cacnb4, Kif26b, D430041D05Rik, Naaladl2, Sgcz, Brinp1, Xkr6, Atp8a2, Stxbp1, Dnajc6, Brinp3, Rps2, Diaph2, Igsf8, Rpsa, Plcl1, Ubc, Ifitm3, Epas1, Cobll1, Rps4x, Actb, Rpl3, Cfl1, Cdc42, Spock2, ENSMUSG00000040904, Rps29, Rps24, B2m, Atp6v0c, Rap1a, R…	1619
GO:0006414	translational elongation	6	2	0.54	0.09328	0.09328	3dpi	BP	NonN_8	GO:0006414	Rplp1, Rplp2	144	Kcnb2, Rbfox3, Cdh18, Hs3st4, Grik1, Trhde, Dpp6, Sgcd, Pcdh10, Ntrk3, Slc8a3, Pcdh11x, Upp2, Meg3, Samd4, Cntnap2, Tmem132b, Mctp1, Jakmip2, Dner, Cacnb4, Kif26b, D430041D05Rik, Naaladl2, Sgcz, Brinp1, Xkr6, Atp8a2, Stxbp1, Dnajc6, Brinp3, Rps2, Diaph2, Igsf8, Rpsa, Plcl1, Ubc, Ifitm3, Epas1, Cobll1, Rps4x, Actb, Rpl3, Cfl1, Cdc42, Spock2, ENSMUSG00000040904, Rps29, Rps24, B2m, Atp6v0c, Rap1a, R…	1619
GO:0009988	cell-cell recognition	6	2	0.54	0.09328	0.09328	3dpi	BP	NonN_8	GO:0009988	Aldoa, Cd81	144	Kcnb2, Rbfox3, Cdh18, Hs3st4, Grik1, Trhde, Dpp6, Sgcd, Pcdh10, Ntrk3, Slc8a3, Pcdh11x, Upp2, Meg3, Samd4, Cntnap2, Tmem132b, Mctp1, Jakmip2, Dner, Cacnb4, Kif26b, D430041D05Rik, Naaladl2, Sgcz, Brinp1, Xkr6, Atp8a2, Stxbp1, Dnajc6, Brinp3, Rps2, Diaph2, Igsf8, Rpsa, Plcl1, Ubc, Ifitm3, Epas1, Cobll1, Rps4x, Actb, Rpl3, Cfl1, Cdc42, Spock2, ENSMUSG00000040904, Rps29, Rps24, B2m, Atp6v0c, Rap1a, R…	1619
GO:0010523	negative regulation of calcium ion trans...	6	2	0.54	0.09328	0.09328	3dpi	BP	NonN_8	GO:0010523	Calm1, Calm2	144	Kcnb2, Rbfox3, Cdh18, Hs3st4, Grik1, Trhde, Dpp6, Sgcd, Pcdh10, Ntrk3, Slc8a3, Pcdh11x, Upp2, Meg3, Samd4, Cntnap2, Tmem132b, Mctp1, Jakmip2, Dner, Cacnb4, Kif26b, D430041D05Rik, Naaladl2, Sgcz, Brinp1, Xkr6, Atp8a2, Stxbp1, Dnajc6, Brinp3, Rps2, Diaph2, Igsf8, Rpsa, Plcl1, Ubc, Ifitm3, Epas1, Cobll1, Rps4x, Actb, Rpl3, Cfl1, Cdc42, Spock2, ENSMUSG00000040904, Rps29, Rps24, B2m, Atp6v0c, Rap1a, R…	1619
GO:0021884	forebrain neuron development	6	2	0.54	0.09328	0.09328	3dpi	BP	NonN_8	GO:0021884	Ubb, Uqcrq	144	Kcnb2, Rbfox3, Cdh18, Hs3st4, Grik1, Trhde, Dpp6, Sgcd, Pcdh10, Ntrk3, Slc8a3, Pcdh11x, Upp2, Meg3, Samd4, Cntnap2, Tmem132b, Mctp1, Jakmip2, Dner, Cacnb4, Kif26b, D430041D05Rik, Naaladl2, Sgcz, Brinp1, Xkr6, Atp8a2, Stxbp1, Dnajc6, Brinp3, Rps2, Diaph2, Igsf8, Rpsa, Plcl1, Ubc, Ifitm3, Epas1, Cobll1, Rps4x, Actb, Rpl3, Cfl1, Cdc42, Spock2, ENSMUSG00000040904, Rps29, Rps24, B2m, Atp6v0c, Rap1a, R…	1619
GO:0042776	mitochondrial ATP synthesis coupled prot...	6	2	0.54	0.09328	0.09328	3dpi	BP	NonN_8	GO:0042776	Atp5j, Atp5j2	144	Kcnb2, Rbfox3, Cdh18, Hs3st4, Grik1, Trhde, Dpp6, Sgcd, Pcdh10, Ntrk3, Slc8a3, Pcdh11x, Upp2, Meg3, Samd4, Cntnap2, Tmem132b, Mctp1, Jakmip2, Dner, Cacnb4, Kif26b, D430041D05Rik, Naaladl2, Sgcz, Brinp1, Xkr6, Atp8a2, Stxbp1, Dnajc6, Brinp3, Rps2, Diaph2, Igsf8, Rpsa, Plcl1, Ubc, Ifitm3, Epas1, Cobll1, Rps4x, Actb, Rpl3, Cfl1, Cdc42, Spock2, ENSMUSG00000040904, Rps29, Rps24, B2m, Atp6v0c, Rap1a, R…	1619
GO:0043303	mast cell degranulation	6	2	0.54	0.09328	0.09328	3dpi	BP	NonN_8	GO:0043303	Ptgds, Stxbp1	144	Kcnb2, Rbfox3, Cdh18, Hs3st4, Grik1, Trhde, Dpp6, Sgcd, Pcdh10, Ntrk3, Slc8a3, Pcdh11x, Upp2, Meg3, Samd4, Cntnap2, Tmem132b, Mctp1, Jakmip2, Dner, Cacnb4, Kif26b, D430041D05Rik, Naaladl2, Sgcz, Brinp1, Xkr6, Atp8a2, Stxbp1, Dnajc6, Brinp3, Rps2, Diaph2, Igsf8, Rpsa, Plcl1, Ubc, Ifitm3, Epas1, Cobll1, Rps4x, Actb, Rpl3, Cfl1, Cdc42, Spock2, ENSMUSG00000040904, Rps29, Rps24, B2m, Atp6v0c, Rap1a, R…	1619
GO:0045069	regulation of viral genome replication	6	2	0.54	0.09328	0.09328	3dpi	BP	NonN_8	GO:0045069	Ifitm3, Ppia	144	Kcnb2, Rbfox3, Cdh18, Hs3st4, Grik1, Trhde, Dpp6, Sgcd, Pcdh10, Ntrk3, Slc8a3, Pcdh11x, Upp2, Meg3, Samd4, Cntnap2, Tmem132b, Mctp1, Jakmip2, Dner, Cacnb4, Kif26b, D430041D05Rik, Naaladl2, Sgcz, Brinp1, Xkr6, Atp8a2, Stxbp1, Dnajc6, Brinp3, Rps2, Diaph2, Igsf8, Rpsa, Plcl1, Ubc, Ifitm3, Epas1, Cobll1, Rps4x, Actb, Rpl3, Cfl1, Cdc42, Spock2, ENSMUSG00000040904, Rps29, Rps24, B2m, Atp6v0c, Rap1a, R…	1619
GO:0045576	mast cell activation	6	2	0.54	0.09328	0.09328	3dpi	BP	NonN_8	GO:0045576	Ptgds, Stxbp1	144	Kcnb2, Rbfox3, Cdh18, Hs3st4, Grik1, Trhde, Dpp6, Sgcd, Pcdh10, Ntrk3, Slc8a3, Pcdh11x, Upp2, Meg3, Samd4, Cntnap2, Tmem132b, Mctp1, Jakmip2, Dner, Cacnb4, Kif26b, D430041D05Rik, Naaladl2, Sgcz, Brinp1, Xkr6, Atp8a2, Stxbp1, Dnajc6, Brinp3, Rps2, Diaph2, Igsf8, Rpsa, Plcl1, Ubc, Ifitm3, Epas1, Cobll1, Rps4x, Actb, Rpl3, Cfl1, Cdc42, Spock2, ENSMUSG00000040904, Rps29, Rps24, B2m, Atp6v0c, Rap1a, R…	1619
GO:0048524	positive regulation of viral process	6	2	0.54	0.09328	0.09328	3dpi	BP	NonN_8	GO:0048524	Bsg, Ppia	144	Kcnb2, Rbfox3, Cdh18, Hs3st4, Grik1, Trhde, Dpp6, Sgcd, Pcdh10, Ntrk3, Slc8a3, Pcdh11x, Upp2, Meg3, Samd4, Cntnap2, Tmem132b, Mctp1, Jakmip2, Dner, Cacnb4, Kif26b, D430041D05Rik, Naaladl2, Sgcz, Brinp1, Xkr6, Atp8a2, Stxbp1, Dnajc6, Brinp3, Rps2, Diaph2, Igsf8, Rpsa, Plcl1, Ubc, Ifitm3, Epas1, Cobll1, Rps4x, Actb, Rpl3, Cfl1, Cdc42, Spock2, ENSMUSG00000040904, Rps29, Rps24, B2m, Atp6v0c, Rap1a, R…	1619
GO:0050879	multicellular organismal movement	6	2	0.54	0.09328	0.09328	3dpi	BP	NonN_8	GO:0050879	Atp8a2, Slc8a3	144	Kcnb2, Rbfox3, Cdh18, Hs3st4, Grik1, Trhde, Dpp6, Sgcd, Pcdh10, Ntrk3, Slc8a3, Pcdh11x, Upp2, Meg3, Samd4, Cntnap2, Tmem132b, Mctp1, Jakmip2, Dner, Cacnb4, Kif26b, D430041D05Rik, Naaladl2, Sgcz, Brinp1, Xkr6, Atp8a2, Stxbp1, Dnajc6, Brinp3, Rps2, Diaph2, Igsf8, Rpsa, Plcl1, Ubc, Ifitm3, Epas1, Cobll1, Rps4x, Actb, Rpl3, Cfl1, Cdc42, Spock2, ENSMUSG00000040904, Rps29, Rps24, B2m, Atp6v0c, Rap1a, R…	1619
GO:0050881	musculoskeletal movement	6	2	0.54	0.09328	0.09328	3dpi	BP	NonN_8	GO:0050881	Atp8a2, Slc8a3	144	Kcnb2, Rbfox3, Cdh18, Hs3st4, Grik1, Trhde, Dpp6, Sgcd, Pcdh10, Ntrk3, Slc8a3, Pcdh11x, Upp2, Meg3, Samd4, Cntnap2, Tmem132b, Mctp1, Jakmip2, Dner, Cacnb4, Kif26b, D430041D05Rik, Naaladl2, Sgcz, Brinp1, Xkr6, Atp8a2, Stxbp1, Dnajc6, Brinp3, Rps2, Diaph2, Igsf8, Rpsa, Plcl1, Ubc, Ifitm3, Epas1, Cobll1, Rps4x, Actb, Rpl3, Cfl1, Cdc42, Spock2, ENSMUSG00000040904, Rps29, Rps24, B2m, Atp6v0c, Rap1a, R…	1619
GO:0060314	regulation of ryanodine-sensitive calciu...	6	2	0.54	0.09328	0.09328	3dpi	BP	NonN_8	GO:0060314	Calm1, Calm2	144	Kcnb2, Rbfox3, Cdh18, Hs3st4, Grik1, Trhde, Dpp6, Sgcd, Pcdh10, Ntrk3, Slc8a3, Pcdh11x, Upp2, Meg3, Samd4, Cntnap2, Tmem132b, Mctp1, Jakmip2, Dner, Cacnb4, Kif26b, D430041D05Rik, Naaladl2, Sgcz, Brinp1, Xkr6, Atp8a2, Stxbp1, Dnajc6, Brinp3, Rps2, Diaph2, Igsf8, Rpsa, Plcl1, Ubc, Ifitm3, Epas1, Cobll1, Rps4x, Actb, Rpl3, Cfl1, Cdc42, Spock2, ENSMUSG00000040904, Rps29, Rps24, B2m, Atp6v0c, Rap1a, R…	1619
GO:0070664	negative regulation of leukocyte prolife...	6	2	0.54	0.09328	0.09328	3dpi	BP	NonN_8	GO:0070664	Gstp1, Ndfip1	144	Kcnb2, Rbfox3, Cdh18, Hs3st4, Grik1, Trhde, Dpp6, Sgcd, Pcdh10, Ntrk3, Slc8a3, Pcdh11x, Upp2, Meg3, Samd4, Cntnap2, Tmem132b, Mctp1, Jakmip2, Dner, Cacnb4, Kif26b, D430041D05Rik, Naaladl2, Sgcz, Brinp1, Xkr6, Atp8a2, Stxbp1, Dnajc6, Brinp3, Rps2, Diaph2, Igsf8, Rpsa, Plcl1, Ubc, Ifitm3, Epas1, Cobll1, Rps4x, Actb, Rpl3, Cfl1, Cdc42, Spock2, ENSMUSG00000040904, Rps29, Rps24, B2m, Atp6v0c, Rap1a, R…	1619
GO:0090218	positive regulation of lipid kinase acti...	6	2	0.54	0.09328	0.09328	3dpi	BP	NonN_8	GO:0090218	Cd81, Cdc42	144	Kcnb2, Rbfox3, Cdh18, Hs3st4, Grik1, Trhde, Dpp6, Sgcd, Pcdh10, Ntrk3, Slc8a3, Pcdh11x, Upp2, Meg3, Samd4, Cntnap2, Tmem132b, Mctp1, Jakmip2, Dner, Cacnb4, Kif26b, D430041D05Rik, Naaladl2, Sgcz, Brinp1, Xkr6, Atp8a2, Stxbp1, Dnajc6, Brinp3, Rps2, Diaph2, Igsf8, Rpsa, Plcl1, Ubc, Ifitm3, Epas1, Cobll1, Rps4x, Actb, Rpl3, Cfl1, Cdc42, Spock2, ENSMUSG00000040904, Rps29, Rps24, B2m, Atp6v0c, Rap1a, R…	1619
GO:0098754	detoxification	6	2	0.54	0.09328	0.09328	3dpi	BP	NonN_8	GO:0098754	Mt1, Prdx1	144	Kcnb2, Rbfox3, Cdh18, Hs3st4, Grik1, Trhde, Dpp6, Sgcd, Pcdh10, Ntrk3, Slc8a3, Pcdh11x, Upp2, Meg3, Samd4, Cntnap2, Tmem132b, Mctp1, Jakmip2, Dner, Cacnb4, Kif26b, D430041D05Rik, Naaladl2, Sgcz, Brinp1, Xkr6, Atp8a2, Stxbp1, Dnajc6, Brinp3, Rps2, Diaph2, Igsf8, Rpsa, Plcl1, Ubc, Ifitm3, Epas1, Cobll1, Rps4x, Actb, Rpl3, Cfl1, Cdc42, Spock2, ENSMUSG00000040904, Rps29, Rps24, B2m, Atp6v0c, Rap1a, R…	1619
GO:1904666	regulation of ubiquitin protein ligase a...	6	2	0.54	0.09328	0.09328	3dpi	BP	NonN_8	GO:1904666	Rpl11, Rpl23	144	Kcnb2, Rbfox3, Cdh18, Hs3st4, Grik1, Trhde, Dpp6, Sgcd, Pcdh10, Ntrk3, Slc8a3, Pcdh11x, Upp2, Meg3, Samd4, Cntnap2, Tmem132b, Mctp1, Jakmip2, Dner, Cacnb4, Kif26b, D430041D05Rik, Naaladl2, Sgcz, Brinp1, Xkr6, Atp8a2, Stxbp1, Dnajc6, Brinp3, Rps2, Diaph2, Igsf8, Rpsa, Plcl1, Ubc, Ifitm3, Epas1, Cobll1, Rps4x, Actb, Rpl3, Cfl1, Cdc42, Spock2, ENSMUSG00000040904, Rps29, Rps24, B2m, Atp6v0c, Rap1a, R…	1619
GO:1990000	amyloid fibril formation	6	2	0.54	0.09328	0.09328	3dpi	BP	NonN_8	GO:1990000	B2m, Pfdn5	144	Kcnb2, Rbfox3, Cdh18, Hs3st4, Grik1, Trhde, Dpp6, Sgcd, Pcdh10, Ntrk3, Slc8a3, Pcdh11x, Upp2, Meg3, Samd4, Cntnap2, Tmem132b, Mctp1, Jakmip2, Dner, Cacnb4, Kif26b, D430041D05Rik, Naaladl2, Sgcz, Brinp1, Xkr6, Atp8a2, Stxbp1, Dnajc6, Brinp3, Rps2, Diaph2, Igsf8, Rpsa, Plcl1, Ubc, Ifitm3, Epas1, Cobll1, Rps4x, Actb, Rpl3, Cfl1, Cdc42, Spock2, ENSMUSG00000040904, Rps29, Rps24, B2m, Atp6v0c, Rap1a, R…	1619
GO:2001258	negative regulation of cation channel ac...	6	2	0.54	0.09328	0.09328	3dpi	BP	NonN_8	GO:2001258	Calm1, Calm2	144	Kcnb2, Rbfox3, Cdh18, Hs3st4, Grik1, Trhde, Dpp6, Sgcd, Pcdh10, Ntrk3, Slc8a3, Pcdh11x, Upp2, Meg3, Samd4, Cntnap2, Tmem132b, Mctp1, Jakmip2, Dner, Cacnb4, Kif26b, D430041D05Rik, Naaladl2, Sgcz, Brinp1, Xkr6, Atp8a2, Stxbp1, Dnajc6, Brinp3, Rps2, Diaph2, Igsf8, Rpsa, Plcl1, Ubc, Ifitm3, Epas1, Cobll1, Rps4x, Actb, Rpl3, Cfl1, Cdc42, Spock2, ENSMUSG00000040904, Rps29, Rps24, B2m, Atp6v0c, Rap1a, R…	1619
GO:0019953	sexual reproduction	71	10	6.33	0.09336	0.09336	3dpi	BP	NonN_8	GO:0019953	Aldoa, Bsg, Diaph2, Gpx4, H3f3b, Ptgds, Ptn, Septin7, Stxbp1, Ubb	144	Kcnb2, Rbfox3, Cdh18, Hs3st4, Grik1, Trhde, Dpp6, Sgcd, Pcdh10, Ntrk3, Slc8a3, Pcdh11x, Upp2, Meg3, Samd4, Cntnap2, Tmem132b, Mctp1, Jakmip2, Dner, Cacnb4, Kif26b, D430041D05Rik, Naaladl2, Sgcz, Brinp1, Xkr6, Atp8a2, Stxbp1, Dnajc6, Brinp3, Rps2, Diaph2, Igsf8, Rpsa, Plcl1, Ubc, Ifitm3, Epas1, Cobll1, Rps4x, Actb, Rpl3, Cfl1, Cdc42, Spock2, ENSMUSG00000040904, Rps29, Rps24, B2m, Atp6v0c, Rap1a, R…	1619
GO:1901019	regulation of calcium ion transmembrane ...	20	4	1.78	0.09541	0.09541	3dpi	BP	NonN_8	GO:1901019	Atp1a2, Cacnb4, Calm1, Calm2	144	Kcnb2, Rbfox3, Cdh18, Hs3st4, Grik1, Trhde, Dpp6, Sgcd, Pcdh10, Ntrk3, Slc8a3, Pcdh11x, Upp2, Meg3, Samd4, Cntnap2, Tmem132b, Mctp1, Jakmip2, Dner, Cacnb4, Kif26b, D430041D05Rik, Naaladl2, Sgcz, Brinp1, Xkr6, Atp8a2, Stxbp1, Dnajc6, Brinp3, Rps2, Diaph2, Igsf8, Rpsa, Plcl1, Ubc, Ifitm3, Epas1, Cobll1, Rps4x, Actb, Rpl3, Cfl1, Cdc42, Spock2, ENSMUSG00000040904, Rps29, Rps24, B2m, Atp6v0c, Rap1a, R…	1619
GO:2001242	regulation of intrinsic apoptotic signal...	20	4	1.78	0.09541	0.09541	3dpi	BP	NonN_8	GO:2001242	Ppia, Rpl11, Rps3, Ubb	144	Kcnb2, Rbfox3, Cdh18, Hs3st4, Grik1, Trhde, Dpp6, Sgcd, Pcdh10, Ntrk3, Slc8a3, Pcdh11x, Upp2, Meg3, Samd4, Cntnap2, Tmem132b, Mctp1, Jakmip2, Dner, Cacnb4, Kif26b, D430041D05Rik, Naaladl2, Sgcz, Brinp1, Xkr6, Atp8a2, Stxbp1, Dnajc6, Brinp3, Rps2, Diaph2, Igsf8, Rpsa, Plcl1, Ubc, Ifitm3, Epas1, Cobll1, Rps4x, Actb, Rpl3, Cfl1, Cdc42, Spock2, ENSMUSG00000040904, Rps29, Rps24, B2m, Atp6v0c, Rap1a, R…	1619
GO:1903037	regulation of leukocyte cell-cell adhesi...	28	5	2.5	0.09688	0.09688	3dpi	BP	NonN_8	GO:1903037	B2m, Cd81, Gstp1, Ndfip1, Rps3	144	Kcnb2, Rbfox3, Cdh18, Hs3st4, Grik1, Trhde, Dpp6, Sgcd, Pcdh10, Ntrk3, Slc8a3, Pcdh11x, Upp2, Meg3, Samd4, Cntnap2, Tmem132b, Mctp1, Jakmip2, Dner, Cacnb4, Kif26b, D430041D05Rik, Naaladl2, Sgcz, Brinp1, Xkr6, Atp8a2, Stxbp1, Dnajc6, Brinp3, Rps2, Diaph2, Igsf8, Rpsa, Plcl1, Ubc, Ifitm3, Epas1, Cobll1, Rps4x, Actb, Rpl3, Cfl1, Cdc42, Spock2, ENSMUSG00000040904, Rps29, Rps24, B2m, Atp6v0c, Rap1a, R…	1619
GO:0044085	cellular component biogenesis	352	38	31.39	0.09758	0.92845	3dpi	BP	NonN_8	GO:0044085	Actb, B2m, Cdc42, Cdh18, Cfl1, Cntnap2, Cox7a2, Diaph2, Dynll1, Gpx4, H3f3b, Hsp90ab1, Kcnb2, Ndufc2, Ntrk3, Rap1a, Rpl11, Rpl14, Rpl24, Rpl27, Rpl3, Rpl35, Rpl38, Rpl6, Rpl7, Rps14, Rps2, Rps21, Rps24, Rps27, Rps27rt, Rps3, Rps5, Rps8, Rpsa, Septin7, Stxbp1, Tmsb10	144	Kcnb2, Rbfox3, Cdh18, Hs3st4, Grik1, Trhde, Dpp6, Sgcd, Pcdh10, Ntrk3, Slc8a3, Pcdh11x, Upp2, Meg3, Samd4, Cntnap2, Tmem132b, Mctp1, Jakmip2, Dner, Cacnb4, Kif26b, D430041D05Rik, Naaladl2, Sgcz, Brinp1, Xkr6, Atp8a2, Stxbp1, Dnajc6, Brinp3, Rps2, Diaph2, Igsf8, Rpsa, Plcl1, Ubc, Ifitm3, Epas1, Cobll1, Rps4x, Actb, Rpl3, Cfl1, Cdc42, Spock2, ENSMUSG00000040904, Rps29, Rps24, B2m, Atp6v0c, Rap1a, R…	1619
GO:0006936	muscle contraction	45	7	4.01	0.09890	0.09890	3dpi	BP	NonN_8	GO:0006936	Aldoa, Atp1a2, Atp8a2, Calm1, Calm2, Sgcd, Slc8a3	144	Kcnb2, Rbfox3, Cdh18, Hs3st4, Grik1, Trhde, Dpp6, Sgcd, Pcdh10, Ntrk3, Slc8a3, Pcdh11x, Upp2, Meg3, Samd4, Cntnap2, Tmem132b, Mctp1, Jakmip2, Dner, Cacnb4, Kif26b, D430041D05Rik, Naaladl2, Sgcz, Brinp1, Xkr6, Atp8a2, Stxbp1, Dnajc6, Brinp3, Rps2, Diaph2, Igsf8, Rpsa, Plcl1, Ubc, Ifitm3, Epas1, Cobll1, Rps4x, Actb, Rpl3, Cfl1, Cdc42, Spock2, ENSMUSG00000040904, Rps29, Rps24, B2m, Atp6v0c, Rap1a, R…	1619
GO:0051338	regulation of transferase activity	100	13	8.92	0.10050	0.10050	3dpi	BP	NonN_8	GO:0051338	Actb, Cd81, Cdc42, Gstp1, Hsp90ab1, Ntrk3, Ppia, Rap1a, Rpl11, Rpl23, Rps2, Rps3, Slc8a3	144	Kcnb2, Rbfox3, Cdh18, Hs3st4, Grik1, Trhde, Dpp6, Sgcd, Pcdh10, Ntrk3, Slc8a3, Pcdh11x, Upp2, Meg3, Samd4, Cntnap2, Tmem132b, Mctp1, Jakmip2, Dner, Cacnb4, Kif26b, D430041D05Rik, Naaladl2, Sgcz, Brinp1, Xkr6, Atp8a2, Stxbp1, Dnajc6, Brinp3, Rps2, Diaph2, Igsf8, Rpsa, Plcl1, Ubc, Ifitm3, Epas1, Cobll1, Rps4x, Actb, Rpl3, Cfl1, Cdc42, Spock2, ENSMUSG00000040904, Rps29, Rps24, B2m, Atp6v0c, Rap1a, R…	1619
GO:0001662	behavioral fear response	13	3	1.16	0.10229	0.10229	3dpi	BP	NonN_8	GO:0001662	Atp1a2, Brinp1, Pde8b	144	Kcnb2, Rbfox3, Cdh18, Hs3st4, Grik1, Trhde, Dpp6, Sgcd, Pcdh10, Ntrk3, Slc8a3, Pcdh11x, Upp2, Meg3, Samd4, Cntnap2, Tmem132b, Mctp1, Jakmip2, Dner, Cacnb4, Kif26b, D430041D05Rik, Naaladl2, Sgcz, Brinp1, Xkr6, Atp8a2, Stxbp1, Dnajc6, Brinp3, Rps2, Diaph2, Igsf8, Rpsa, Plcl1, Ubc, Ifitm3, Epas1, Cobll1, Rps4x, Actb, Rpl3, Cfl1, Cdc42, Spock2, ENSMUSG00000040904, Rps29, Rps24, B2m, Atp6v0c, Rap1a, R…	1619
GO:0001890	placenta development	13	3	1.16	0.10229	0.10229	3dpi	BP	NonN_8	GO:0001890	Epas1, Hsp90ab1, Ptn	144	Kcnb2, Rbfox3, Cdh18, Hs3st4, Grik1, Trhde, Dpp6, Sgcd, Pcdh10, Ntrk3, Slc8a3, Pcdh11x, Upp2, Meg3, Samd4, Cntnap2, Tmem132b, Mctp1, Jakmip2, Dner, Cacnb4, Kif26b, D430041D05Rik, Naaladl2, Sgcz, Brinp1, Xkr6, Atp8a2, Stxbp1, Dnajc6, Brinp3, Rps2, Diaph2, Igsf8, Rpsa, Plcl1, Ubc, Ifitm3, Epas1, Cobll1, Rps4x, Actb, Rpl3, Cfl1, Cdc42, Spock2, ENSMUSG00000040904, Rps29, Rps24, B2m, Atp6v0c, Rap1a, R…	1619
GO:0002209	behavioral defense response	13	3	1.16	0.10229	0.10229	3dpi	BP	NonN_8	GO:0002209	Atp1a2, Brinp1, Pde8b	144	Kcnb2, Rbfox3, Cdh18, Hs3st4, Grik1, Trhde, Dpp6, Sgcd, Pcdh10, Ntrk3, Slc8a3, Pcdh11x, Upp2, Meg3, Samd4, Cntnap2, Tmem132b, Mctp1, Jakmip2, Dner, Cacnb4, Kif26b, D430041D05Rik, Naaladl2, Sgcz, Brinp1, Xkr6, Atp8a2, Stxbp1, Dnajc6, Brinp3, Rps2, Diaph2, Igsf8, Rpsa, Plcl1, Ubc, Ifitm3, Epas1, Cobll1, Rps4x, Actb, Rpl3, Cfl1, Cdc42, Spock2, ENSMUSG00000040904, Rps29, Rps24, B2m, Atp6v0c, Rap1a, R…	1619
GO:0006575	cellular modified amino acid metabolic p...	13	3	1.16	0.10229	0.10229	3dpi	BP	NonN_8	GO:0006575	Ckb, Gpx4, Gstp1	144	Kcnb2, Rbfox3, Cdh18, Hs3st4, Grik1, Trhde, Dpp6, Sgcd, Pcdh10, Ntrk3, Slc8a3, Pcdh11x, Upp2, Meg3, Samd4, Cntnap2, Tmem132b, Mctp1, Jakmip2, Dner, Cacnb4, Kif26b, D430041D05Rik, Naaladl2, Sgcz, Brinp1, Xkr6, Atp8a2, Stxbp1, Dnajc6, Brinp3, Rps2, Diaph2, Igsf8, Rpsa, Plcl1, Ubc, Ifitm3, Epas1, Cobll1, Rps4x, Actb, Rpl3, Cfl1, Cdc42, Spock2, ENSMUSG00000040904, Rps29, Rps24, B2m, Atp6v0c, Rap1a, R…	1619
GO:0016064	immunoglobulin mediated immune response	13	3	1.16	0.10229	0.10229	3dpi	BP	NonN_8	GO:0016064	B2m, Cd81, Ndfip1	144	Kcnb2, Rbfox3, Cdh18, Hs3st4, Grik1, Trhde, Dpp6, Sgcd, Pcdh10, Ntrk3, Slc8a3, Pcdh11x, Upp2, Meg3, Samd4, Cntnap2, Tmem132b, Mctp1, Jakmip2, Dner, Cacnb4, Kif26b, D430041D05Rik, Naaladl2, Sgcz, Brinp1, Xkr6, Atp8a2, Stxbp1, Dnajc6, Brinp3, Rps2, Diaph2, Igsf8, Rpsa, Plcl1, Ubc, Ifitm3, Epas1, Cobll1, Rps4x, Actb, Rpl3, Cfl1, Cdc42, Spock2, ENSMUSG00000040904, Rps29, Rps24, B2m, Atp6v0c, Rap1a, R…	1619
GO:0019724	B cell mediated immunity	13	3	1.16	0.10229	0.10229	3dpi	BP	NonN_8	GO:0019724	B2m, Cd81, Ndfip1	144	Kcnb2, Rbfox3, Cdh18, Hs3st4, Grik1, Trhde, Dpp6, Sgcd, Pcdh10, Ntrk3, Slc8a3, Pcdh11x, Upp2, Meg3, Samd4, Cntnap2, Tmem132b, Mctp1, Jakmip2, Dner, Cacnb4, Kif26b, D430041D05Rik, Naaladl2, Sgcz, Brinp1, Xkr6, Atp8a2, Stxbp1, Dnajc6, Brinp3, Rps2, Diaph2, Igsf8, Rpsa, Plcl1, Ubc, Ifitm3, Epas1, Cobll1, Rps4x, Actb, Rpl3, Cfl1, Cdc42, Spock2, ENSMUSG00000040904, Rps29, Rps24, B2m, Atp6v0c, Rap1a, R…	1619
GO:0032368	regulation of lipid transport	13	3	1.16	0.10229	0.10229	3dpi	BP	NonN_8	GO:0032368	Atp5j, Atp8a2, Pltp	144	Kcnb2, Rbfox3, Cdh18, Hs3st4, Grik1, Trhde, Dpp6, Sgcd, Pcdh10, Ntrk3, Slc8a3, Pcdh11x, Upp2, Meg3, Samd4, Cntnap2, Tmem132b, Mctp1, Jakmip2, Dner, Cacnb4, Kif26b, D430041D05Rik, Naaladl2, Sgcz, Brinp1, Xkr6, Atp8a2, Stxbp1, Dnajc6, Brinp3, Rps2, Diaph2, Igsf8, Rpsa, Plcl1, Ubc, Ifitm3, Epas1, Cobll1, Rps4x, Actb, Rpl3, Cfl1, Cdc42, Spock2, ENSMUSG00000040904, Rps29, Rps24, B2m, Atp6v0c, Rap1a, R…	1619
GO:0032465	regulation of cytokinesis	13	3	1.16	0.10229	0.10229	3dpi	BP	NonN_8	GO:0032465	Calm1, Calm2, Cdc42	144	Kcnb2, Rbfox3, Cdh18, Hs3st4, Grik1, Trhde, Dpp6, Sgcd, Pcdh10, Ntrk3, Slc8a3, Pcdh11x, Upp2, Meg3, Samd4, Cntnap2, Tmem132b, Mctp1, Jakmip2, Dner, Cacnb4, Kif26b, D430041D05Rik, Naaladl2, Sgcz, Brinp1, Xkr6, Atp8a2, Stxbp1, Dnajc6, Brinp3, Rps2, Diaph2, Igsf8, Rpsa, Plcl1, Ubc, Ifitm3, Epas1, Cobll1, Rps4x, Actb, Rpl3, Cfl1, Cdc42, Spock2, ENSMUSG00000040904, Rps29, Rps24, B2m, Atp6v0c, Rap1a, R…	1619
GO:0034332	adherens junction organization	13	3	1.16	0.10229	0.10229	3dpi	BP	NonN_8	GO:0034332	Actb, Cdc42, Cdh18	144	Kcnb2, Rbfox3, Cdh18, Hs3st4, Grik1, Trhde, Dpp6, Sgcd, Pcdh10, Ntrk3, Slc8a3, Pcdh11x, Upp2, Meg3, Samd4, Cntnap2, Tmem132b, Mctp1, Jakmip2, Dner, Cacnb4, Kif26b, D430041D05Rik, Naaladl2, Sgcz, Brinp1, Xkr6, Atp8a2, Stxbp1, Dnajc6, Brinp3, Rps2, Diaph2, Igsf8, Rpsa, Plcl1, Ubc, Ifitm3, Epas1, Cobll1, Rps4x, Actb, Rpl3, Cfl1, Cdc42, Spock2, ENSMUSG00000040904, Rps29, Rps24, B2m, Atp6v0c, Rap1a, R…	1619
GO:0042129	regulation of T cell proliferation	13	3	1.16	0.10229	0.10229	3dpi	BP	NonN_8	GO:0042129	Cd81, Ndfip1, Rps3	144	Kcnb2, Rbfox3, Cdh18, Hs3st4, Grik1, Trhde, Dpp6, Sgcd, Pcdh10, Ntrk3, Slc8a3, Pcdh11x, Upp2, Meg3, Samd4, Cntnap2, Tmem132b, Mctp1, Jakmip2, Dner, Cacnb4, Kif26b, D430041D05Rik, Naaladl2, Sgcz, Brinp1, Xkr6, Atp8a2, Stxbp1, Dnajc6, Brinp3, Rps2, Diaph2, Igsf8, Rpsa, Plcl1, Ubc, Ifitm3, Epas1, Cobll1, Rps4x, Actb, Rpl3, Cfl1, Cdc42, Spock2, ENSMUSG00000040904, Rps29, Rps24, B2m, Atp6v0c, Rap1a, R…	1619
GO:0042742	defense response to bacterium	13	3	1.16	0.10229	0.10229	3dpi	BP	NonN_8	GO:0042742	B2m, Fau, Rpl30	144	Kcnb2, Rbfox3, Cdh18, Hs3st4, Grik1, Trhde, Dpp6, Sgcd, Pcdh10, Ntrk3, Slc8a3, Pcdh11x, Upp2, Meg3, Samd4, Cntnap2, Tmem132b, Mctp1, Jakmip2, Dner, Cacnb4, Kif26b, D430041D05Rik, Naaladl2, Sgcz, Brinp1, Xkr6, Atp8a2, Stxbp1, Dnajc6, Brinp3, Rps2, Diaph2, Igsf8, Rpsa, Plcl1, Ubc, Ifitm3, Epas1, Cobll1, Rps4x, Actb, Rpl3, Cfl1, Cdc42, Spock2, ENSMUSG00000040904, Rps29, Rps24, B2m, Atp6v0c, Rap1a, R…	1619
GO:0043666	regulation of phosphoprotein phosphatase...	13	3	1.16	0.10229	1.00000	3dpi	BP	NonN_8	GO:0043666	Calm1, Calm2, Hsp90ab1	144	Kcnb2, Rbfox3, Cdh18, Hs3st4, Grik1, Trhde, Dpp6, Sgcd, Pcdh10, Ntrk3, Slc8a3, Pcdh11x, Upp2, Meg3, Samd4, Cntnap2, Tmem132b, Mctp1, Jakmip2, Dner, Cacnb4, Kif26b, D430041D05Rik, Naaladl2, Sgcz, Brinp1, Xkr6, Atp8a2, Stxbp1, Dnajc6, Brinp3, Rps2, Diaph2, Igsf8, Rpsa, Plcl1, Ubc, Ifitm3, Epas1, Cobll1, Rps4x, Actb, Rpl3, Cfl1, Cdc42, Spock2, ENSMUSG00000040904, Rps29, Rps24, B2m, Atp6v0c, Rap1a, R…	1619
GO:0051932	synaptic transmission, GABAergic	13	3	1.16	0.10229	0.10229	3dpi	BP	NonN_8	GO:0051932	Grik1, Plcl1, Stxbp1	144	Kcnb2, Rbfox3, Cdh18, Hs3st4, Grik1, Trhde, Dpp6, Sgcd, Pcdh10, Ntrk3, Slc8a3, Pcdh11x, Upp2, Meg3, Samd4, Cntnap2, Tmem132b, Mctp1, Jakmip2, Dner, Cacnb4, Kif26b, D430041D05Rik, Naaladl2, Sgcz, Brinp1, Xkr6, Atp8a2, Stxbp1, Dnajc6, Brinp3, Rps2, Diaph2, Igsf8, Rpsa, Plcl1, Ubc, Ifitm3, Epas1, Cobll1, Rps4x, Actb, Rpl3, Cfl1, Cdc42, Spock2, ENSMUSG00000040904, Rps29, Rps24, B2m, Atp6v0c, Rap1a, R…	1619
GO:0051726	regulation of cell cycle	91	12	8.11	0.10332	0.10332	3dpi	BP	NonN_8	GO:0051726	Actb, Brinp1, Brinp3, Cacnb4, Calm1, Calm2, Cdc42, Hsp90ab1, Rpl17, Rpl23, Rpl24, Rps15a	144	Kcnb2, Rbfox3, Cdh18, Hs3st4, Grik1, Trhde, Dpp6, Sgcd, Pcdh10, Ntrk3, Slc8a3, Pcdh11x, Upp2, Meg3, Samd4, Cntnap2, Tmem132b, Mctp1, Jakmip2, Dner, Cacnb4, Kif26b, D430041D05Rik, Naaladl2, Sgcz, Brinp1, Xkr6, Atp8a2, Stxbp1, Dnajc6, Brinp3, Rps2, Diaph2, Igsf8, Rpsa, Plcl1, Ubc, Ifitm3, Epas1, Cobll1, Rps4x, Actb, Rpl3, Cfl1, Cdc42, Spock2, ENSMUSG00000040904, Rps29, Rps24, B2m, Atp6v0c, Rap1a, R…	1619
GO:0062197	cellular response to chemical stress	37	6	3.3	0.10468	0.10468	3dpi	BP	NonN_8	GO:0062197	Cfl1, Chchd2, Epas1, Ppia, Prdx1, Rps3	144	Kcnb2, Rbfox3, Cdh18, Hs3st4, Grik1, Trhde, Dpp6, Sgcd, Pcdh10, Ntrk3, Slc8a3, Pcdh11x, Upp2, Meg3, Samd4, Cntnap2, Tmem132b, Mctp1, Jakmip2, Dner, Cacnb4, Kif26b, D430041D05Rik, Naaladl2, Sgcz, Brinp1, Xkr6, Atp8a2, Stxbp1, Dnajc6, Brinp3, Rps2, Diaph2, Igsf8, Rpsa, Plcl1, Ubc, Ifitm3, Epas1, Cobll1, Rps4x, Actb, Rpl3, Cfl1, Cdc42, Spock2, ENSMUSG00000040904, Rps29, Rps24, B2m, Atp6v0c, Rap1a, R…	1619
GO:0055086	nucleobase-containing small molecule met...	46	7	4.1	0.10837	0.10837	3dpi	BP	NonN_8	GO:0055086	Aldoa, Atp5j, Atp5j2, Cacnb4, Hint1, Ndufc2, Upp2	144	Kcnb2, Rbfox3, Cdh18, Hs3st4, Grik1, Trhde, Dpp6, Sgcd, Pcdh10, Ntrk3, Slc8a3, Pcdh11x, Upp2, Meg3, Samd4, Cntnap2, Tmem132b, Mctp1, Jakmip2, Dner, Cacnb4, Kif26b, D430041D05Rik, Naaladl2, Sgcz, Brinp1, Xkr6, Atp8a2, Stxbp1, Dnajc6, Brinp3, Rps2, Diaph2, Igsf8, Rpsa, Plcl1, Ubc, Ifitm3, Epas1, Cobll1, Rps4x, Actb, Rpl3, Cfl1, Cdc42, Spock2, ENSMUSG00000040904, Rps29, Rps24, B2m, Atp6v0c, Rap1a, R…	1619
GO:0032414	positive regulation of ion transmembrane...	29	5	2.59	0.10907	0.10907	3dpi	BP	NonN_8	GO:0032414	Cacnb4, Calm1, Calm2, Cfl1, Ndufa4	144	Kcnb2, Rbfox3, Cdh18, Hs3st4, Grik1, Trhde, Dpp6, Sgcd, Pcdh10, Ntrk3, Slc8a3, Pcdh11x, Upp2, Meg3, Samd4, Cntnap2, Tmem132b, Mctp1, Jakmip2, Dner, Cacnb4, Kif26b, D430041D05Rik, Naaladl2, Sgcz, Brinp1, Xkr6, Atp8a2, Stxbp1, Dnajc6, Brinp3, Rps2, Diaph2, Igsf8, Rpsa, Plcl1, Ubc, Ifitm3, Epas1, Cobll1, Rps4x, Actb, Rpl3, Cfl1, Cdc42, Spock2, ENSMUSG00000040904, Rps29, Rps24, B2m, Atp6v0c, Rap1a, R…	1619
GO:0007276	gamete generation	55	8	4.9	0.10959	0.10959	3dpi	BP	NonN_8	GO:0007276	Bsg, Diaph2, Gpx4, H3f3b, Ptgds, Ptn, Septin7, Ubb	144	Kcnb2, Rbfox3, Cdh18, Hs3st4, Grik1, Trhde, Dpp6, Sgcd, Pcdh10, Ntrk3, Slc8a3, Pcdh11x, Upp2, Meg3, Samd4, Cntnap2, Tmem132b, Mctp1, Jakmip2, Dner, Cacnb4, Kif26b, D430041D05Rik, Naaladl2, Sgcz, Brinp1, Xkr6, Atp8a2, Stxbp1, Dnajc6, Brinp3, Rps2, Diaph2, Igsf8, Rpsa, Plcl1, Ubc, Ifitm3, Epas1, Cobll1, Rps4x, Actb, Rpl3, Cfl1, Cdc42, Spock2, ENSMUSG00000040904, Rps29, Rps24, B2m, Atp6v0c, Rap1a, R…	1619
GO:0002027	regulation of heart rate	21	4	1.87	0.11007	0.11007	3dpi	BP	NonN_8	GO:0002027	Atp5j, Calm1, Calm2, Epas1	144	Kcnb2, Rbfox3, Cdh18, Hs3st4, Grik1, Trhde, Dpp6, Sgcd, Pcdh10, Ntrk3, Slc8a3, Pcdh11x, Upp2, Meg3, Samd4, Cntnap2, Tmem132b, Mctp1, Jakmip2, Dner, Cacnb4, Kif26b, D430041D05Rik, Naaladl2, Sgcz, Brinp1, Xkr6, Atp8a2, Stxbp1, Dnajc6, Brinp3, Rps2, Diaph2, Igsf8, Rpsa, Plcl1, Ubc, Ifitm3, Epas1, Cobll1, Rps4x, Actb, Rpl3, Cfl1, Cdc42, Spock2, ENSMUSG00000040904, Rps29, Rps24, B2m, Atp6v0c, Rap1a, R…	1619
GO:0035303	regulation of dephosphorylation	21	4	1.87	0.11007	0.77061	3dpi	BP	NonN_8	GO:0035303	Calm1, Calm2, Hsp90ab1, Ppia	144	Kcnb2, Rbfox3, Cdh18, Hs3st4, Grik1, Trhde, Dpp6, Sgcd, Pcdh10, Ntrk3, Slc8a3, Pcdh11x, Upp2, Meg3, Samd4, Cntnap2, Tmem132b, Mctp1, Jakmip2, Dner, Cacnb4, Kif26b, D430041D05Rik, Naaladl2, Sgcz, Brinp1, Xkr6, Atp8a2, Stxbp1, Dnajc6, Brinp3, Rps2, Diaph2, Igsf8, Rpsa, Plcl1, Ubc, Ifitm3, Epas1, Cobll1, Rps4x, Actb, Rpl3, Cfl1, Cdc42, Spock2, ENSMUSG00000040904, Rps29, Rps24, B2m, Atp6v0c, Rap1a, R…	1619
GO:0034767	positive regulation of ion transmembrane...	38	6	3.39	0.11563	0.11563	3dpi	BP	NonN_8	GO:0034767	Cacnb4, Calm1, Calm2, Cfl1, Dpp6, Ndufa4	144	Kcnb2, Rbfox3, Cdh18, Hs3st4, Grik1, Trhde, Dpp6, Sgcd, Pcdh10, Ntrk3, Slc8a3, Pcdh11x, Upp2, Meg3, Samd4, Cntnap2, Tmem132b, Mctp1, Jakmip2, Dner, Cacnb4, Kif26b, D430041D05Rik, Naaladl2, Sgcz, Brinp1, Xkr6, Atp8a2, Stxbp1, Dnajc6, Brinp3, Rps2, Diaph2, Igsf8, Rpsa, Plcl1, Ubc, Ifitm3, Epas1, Cobll1, Rps4x, Actb, Rpl3, Cfl1, Cdc42, Spock2, ENSMUSG00000040904, Rps29, Rps24, B2m, Atp6v0c, Rap1a, R…	1619
GO:0034764	positive regulation of transmembrane tra...	47	7	4.19	0.11831	0.11831	3dpi	BP	NonN_8	GO:0034764	Cacnb4, Calm1, Calm2, Cfl1, Dpp6, Ndufa4, Rap1a	144	Kcnb2, Rbfox3, Cdh18, Hs3st4, Grik1, Trhde, Dpp6, Sgcd, Pcdh10, Ntrk3, Slc8a3, Pcdh11x, Upp2, Meg3, Samd4, Cntnap2, Tmem132b, Mctp1, Jakmip2, Dner, Cacnb4, Kif26b, D430041D05Rik, Naaladl2, Sgcz, Brinp1, Xkr6, Atp8a2, Stxbp1, Dnajc6, Brinp3, Rps2, Diaph2, Igsf8, Rpsa, Plcl1, Ubc, Ifitm3, Epas1, Cobll1, Rps4x, Actb, Rpl3, Cfl1, Cdc42, Spock2, ENSMUSG00000040904, Rps29, Rps24, B2m, Atp6v0c, Rap1a, R…	1619
GO:0010921	regulation of phosphatase activity	14	3	1.25	0.12204	1.00000	3dpi	BP	NonN_8	GO:0010921	Calm1, Calm2, Hsp90ab1	144	Kcnb2, Rbfox3, Cdh18, Hs3st4, Grik1, Trhde, Dpp6, Sgcd, Pcdh10, Ntrk3, Slc8a3, Pcdh11x, Upp2, Meg3, Samd4, Cntnap2, Tmem132b, Mctp1, Jakmip2, Dner, Cacnb4, Kif26b, D430041D05Rik, Naaladl2, Sgcz, Brinp1, Xkr6, Atp8a2, Stxbp1, Dnajc6, Brinp3, Rps2, Diaph2, Igsf8, Rpsa, Plcl1, Ubc, Ifitm3, Epas1, Cobll1, Rps4x, Actb, Rpl3, Cfl1, Cdc42, Spock2, ENSMUSG00000040904, Rps29, Rps24, B2m, Atp6v0c, Rap1a, R…	1619
GO:0030218	erythrocyte differentiation	14	3	1.25	0.12204	0.12204	3dpi	BP	NonN_8	GO:0030218	B2m, Epas1, Rps14	144	Kcnb2, Rbfox3, Cdh18, Hs3st4, Grik1, Trhde, Dpp6, Sgcd, Pcdh10, Ntrk3, Slc8a3, Pcdh11x, Upp2, Meg3, Samd4, Cntnap2, Tmem132b, Mctp1, Jakmip2, Dner, Cacnb4, Kif26b, D430041D05Rik, Naaladl2, Sgcz, Brinp1, Xkr6, Atp8a2, Stxbp1, Dnajc6, Brinp3, Rps2, Diaph2, Igsf8, Rpsa, Plcl1, Ubc, Ifitm3, Epas1, Cobll1, Rps4x, Actb, Rpl3, Cfl1, Cdc42, Spock2, ENSMUSG00000040904, Rps29, Rps24, B2m, Atp6v0c, Rap1a, R…	1619
GO:0042596	fear response	14	3	1.25	0.12204	0.12204	3dpi	BP	NonN_8	GO:0042596	Atp1a2, Brinp1, Pde8b	144	Kcnb2, Rbfox3, Cdh18, Hs3st4, Grik1, Trhde, Dpp6, Sgcd, Pcdh10, Ntrk3, Slc8a3, Pcdh11x, Upp2, Meg3, Samd4, Cntnap2, Tmem132b, Mctp1, Jakmip2, Dner, Cacnb4, Kif26b, D430041D05Rik, Naaladl2, Sgcz, Brinp1, Xkr6, Atp8a2, Stxbp1, Dnajc6, Brinp3, Rps2, Diaph2, Igsf8, Rpsa, Plcl1, Ubc, Ifitm3, Epas1, Cobll1, Rps4x, Actb, Rpl3, Cfl1, Cdc42, Spock2, ENSMUSG00000040904, Rps29, Rps24, B2m, Atp6v0c, Rap1a, R…	1619
GO:1905952	regulation of lipid localization	14	3	1.25	0.12204	0.12204	3dpi	BP	NonN_8	GO:1905952	Atp5j, Atp8a2, Pltp	144	Kcnb2, Rbfox3, Cdh18, Hs3st4, Grik1, Trhde, Dpp6, Sgcd, Pcdh10, Ntrk3, Slc8a3, Pcdh11x, Upp2, Meg3, Samd4, Cntnap2, Tmem132b, Mctp1, Jakmip2, Dner, Cacnb4, Kif26b, D430041D05Rik, Naaladl2, Sgcz, Brinp1, Xkr6, Atp8a2, Stxbp1, Dnajc6, Brinp3, Rps2, Diaph2, Igsf8, Rpsa, Plcl1, Ubc, Ifitm3, Epas1, Cobll1, Rps4x, Actb, Rpl3, Cfl1, Cdc42, Spock2, ENSMUSG00000040904, Rps29, Rps24, B2m, Atp6v0c, Rap1a, R…	1619
GO:0001755	neural crest cell migration	7	2	0.62	0.12316	0.12316	3dpi	BP	NonN_8	GO:0001755	Cdc42, Cfl1	144	Kcnb2, Rbfox3, Cdh18, Hs3st4, Grik1, Trhde, Dpp6, Sgcd, Pcdh10, Ntrk3, Slc8a3, Pcdh11x, Upp2, Meg3, Samd4, Cntnap2, Tmem132b, Mctp1, Jakmip2, Dner, Cacnb4, Kif26b, D430041D05Rik, Naaladl2, Sgcz, Brinp1, Xkr6, Atp8a2, Stxbp1, Dnajc6, Brinp3, Rps2, Diaph2, Igsf8, Rpsa, Plcl1, Ubc, Ifitm3, Epas1, Cobll1, Rps4x, Actb, Rpl3, Cfl1, Cdc42, Spock2, ENSMUSG00000040904, Rps29, Rps24, B2m, Atp6v0c, Rap1a, R…	1619
GO:0002711	positive regulation of T cell mediated i...	7	2	0.62	0.12316	0.12316	3dpi	BP	NonN_8	GO:0002711	B2m, Cd81	144	Kcnb2, Rbfox3, Cdh18, Hs3st4, Grik1, Trhde, Dpp6, Sgcd, Pcdh10, Ntrk3, Slc8a3, Pcdh11x, Upp2, Meg3, Samd4, Cntnap2, Tmem132b, Mctp1, Jakmip2, Dner, Cacnb4, Kif26b, D430041D05Rik, Naaladl2, Sgcz, Brinp1, Xkr6, Atp8a2, Stxbp1, Dnajc6, Brinp3, Rps2, Diaph2, Igsf8, Rpsa, Plcl1, Ubc, Ifitm3, Epas1, Cobll1, Rps4x, Actb, Rpl3, Cfl1, Cdc42, Spock2, ENSMUSG00000040904, Rps29, Rps24, B2m, Atp6v0c, Rap1a, R…	1619
GO:0002720	positive regulation of cytokine producti...	7	2	0.62	0.12316	0.12316	3dpi	BP	NonN_8	GO:0002720	B2m, Cd81	144	Kcnb2, Rbfox3, Cdh18, Hs3st4, Grik1, Trhde, Dpp6, Sgcd, Pcdh10, Ntrk3, Slc8a3, Pcdh11x, Upp2, Meg3, Samd4, Cntnap2, Tmem132b, Mctp1, Jakmip2, Dner, Cacnb4, Kif26b, D430041D05Rik, Naaladl2, Sgcz, Brinp1, Xkr6, Atp8a2, Stxbp1, Dnajc6, Brinp3, Rps2, Diaph2, Igsf8, Rpsa, Plcl1, Ubc, Ifitm3, Epas1, Cobll1, Rps4x, Actb, Rpl3, Cfl1, Cdc42, Spock2, ENSMUSG00000040904, Rps29, Rps24, B2m, Atp6v0c, Rap1a, R…	1619
GO:0009166	nucleotide catabolic process	7	2	0.62	0.12316	0.12316	3dpi	BP	NonN_8	GO:0009166	Hint1, Upp2	144	Kcnb2, Rbfox3, Cdh18, Hs3st4, Grik1, Trhde, Dpp6, Sgcd, Pcdh10, Ntrk3, Slc8a3, Pcdh11x, Upp2, Meg3, Samd4, Cntnap2, Tmem132b, Mctp1, Jakmip2, Dner, Cacnb4, Kif26b, D430041D05Rik, Naaladl2, Sgcz, Brinp1, Xkr6, Atp8a2, Stxbp1, Dnajc6, Brinp3, Rps2, Diaph2, Igsf8, Rpsa, Plcl1, Ubc, Ifitm3, Epas1, Cobll1, Rps4x, Actb, Rpl3, Cfl1, Cdc42, Spock2, ENSMUSG00000040904, Rps29, Rps24, B2m, Atp6v0c, Rap1a, R…	1619
GO:0009583	detection of light stimulus	7	2	0.62	0.12316	0.12316	3dpi	BP	NonN_8	GO:0009583	Atp8a2, Cacnb4	144	Kcnb2, Rbfox3, Cdh18, Hs3st4, Grik1, Trhde, Dpp6, Sgcd, Pcdh10, Ntrk3, Slc8a3, Pcdh11x, Upp2, Meg3, Samd4, Cntnap2, Tmem132b, Mctp1, Jakmip2, Dner, Cacnb4, Kif26b, D430041D05Rik, Naaladl2, Sgcz, Brinp1, Xkr6, Atp8a2, Stxbp1, Dnajc6, Brinp3, Rps2, Diaph2, Igsf8, Rpsa, Plcl1, Ubc, Ifitm3, Epas1, Cobll1, Rps4x, Actb, Rpl3, Cfl1, Cdc42, Spock2, ENSMUSG00000040904, Rps29, Rps24, B2m, Atp6v0c, Rap1a, R…	1619
GO:0010524	positive regulation of calcium ion trans...	7	2	0.62	0.12316	0.12316	3dpi	BP	NonN_8	GO:0010524	Calm1, Calm2	144	Kcnb2, Rbfox3, Cdh18, Hs3st4, Grik1, Trhde, Dpp6, Sgcd, Pcdh10, Ntrk3, Slc8a3, Pcdh11x, Upp2, Meg3, Samd4, Cntnap2, Tmem132b, Mctp1, Jakmip2, Dner, Cacnb4, Kif26b, D430041D05Rik, Naaladl2, Sgcz, Brinp1, Xkr6, Atp8a2, Stxbp1, Dnajc6, Brinp3, Rps2, Diaph2, Igsf8, Rpsa, Plcl1, Ubc, Ifitm3, Epas1, Cobll1, Rps4x, Actb, Rpl3, Cfl1, Cdc42, Spock2, ENSMUSG00000040904, Rps29, Rps24, B2m, Atp6v0c, Rap1a, R…	1619
GO:0014051	gamma-aminobutyric acid secretion	7	2	0.62	0.12316	0.12316	3dpi	BP	NonN_8	GO:0014051	Cacnb4, Grik1	144	Kcnb2, Rbfox3, Cdh18, Hs3st4, Grik1, Trhde, Dpp6, Sgcd, Pcdh10, Ntrk3, Slc8a3, Pcdh11x, Upp2, Meg3, Samd4, Cntnap2, Tmem132b, Mctp1, Jakmip2, Dner, Cacnb4, Kif26b, D430041D05Rik, Naaladl2, Sgcz, Brinp1, Xkr6, Atp8a2, Stxbp1, Dnajc6, Brinp3, Rps2, Diaph2, Igsf8, Rpsa, Plcl1, Ubc, Ifitm3, Epas1, Cobll1, Rps4x, Actb, Rpl3, Cfl1, Cdc42, Spock2, ENSMUSG00000040904, Rps29, Rps24, B2m, Atp6v0c, Rap1a, R…	1619
GO:0032091	negative regulation of protein binding	7	2	0.62	0.12316	0.12316	3dpi	BP	NonN_8	GO:0032091	Actb, B2m	144	Kcnb2, Rbfox3, Cdh18, Hs3st4, Grik1, Trhde, Dpp6, Sgcd, Pcdh10, Ntrk3, Slc8a3, Pcdh11x, Upp2, Meg3, Samd4, Cntnap2, Tmem132b, Mctp1, Jakmip2, Dner, Cacnb4, Kif26b, D430041D05Rik, Naaladl2, Sgcz, Brinp1, Xkr6, Atp8a2, Stxbp1, Dnajc6, Brinp3, Rps2, Diaph2, Igsf8, Rpsa, Plcl1, Ubc, Ifitm3, Epas1, Cobll1, Rps4x, Actb, Rpl3, Cfl1, Cdc42, Spock2, ENSMUSG00000040904, Rps29, Rps24, B2m, Atp6v0c, Rap1a, R…	1619
GO:0042246	tissue regeneration	7	2	0.62	0.12316	0.12316	3dpi	BP	NonN_8	GO:0042246	Cd81, Ptn	144	Kcnb2, Rbfox3, Cdh18, Hs3st4, Grik1, Trhde, Dpp6, Sgcd, Pcdh10, Ntrk3, Slc8a3, Pcdh11x, Upp2, Meg3, Samd4, Cntnap2, Tmem132b, Mctp1, Jakmip2, Dner, Cacnb4, Kif26b, D430041D05Rik, Naaladl2, Sgcz, Brinp1, Xkr6, Atp8a2, Stxbp1, Dnajc6, Brinp3, Rps2, Diaph2, Igsf8, Rpsa, Plcl1, Ubc, Ifitm3, Epas1, Cobll1, Rps4x, Actb, Rpl3, Cfl1, Cdc42, Spock2, ENSMUSG00000040904, Rps29, Rps24, B2m, Atp6v0c, Rap1a, R…	1619
GO:0043506	regulation of JUN kinase activity	7	2	0.62	0.12316	0.12316	3dpi	BP	NonN_8	GO:0043506	Gstp1, Rps3	144	Kcnb2, Rbfox3, Cdh18, Hs3st4, Grik1, Trhde, Dpp6, Sgcd, Pcdh10, Ntrk3, Slc8a3, Pcdh11x, Upp2, Meg3, Samd4, Cntnap2, Tmem132b, Mctp1, Jakmip2, Dner, Cacnb4, Kif26b, D430041D05Rik, Naaladl2, Sgcz, Brinp1, Xkr6, Atp8a2, Stxbp1, Dnajc6, Brinp3, Rps2, Diaph2, Igsf8, Rpsa, Plcl1, Ubc, Ifitm3, Epas1, Cobll1, Rps4x, Actb, Rpl3, Cfl1, Cdc42, Spock2, ENSMUSG00000040904, Rps29, Rps24, B2m, Atp6v0c, Rap1a, R…	1619
GO:0045332	phospholipid translocation	7	2	0.62	0.12316	0.12316	3dpi	BP	NonN_8	GO:0045332	Atp8a2, Xkr6	144	Kcnb2, Rbfox3, Cdh18, Hs3st4, Grik1, Trhde, Dpp6, Sgcd, Pcdh10, Ntrk3, Slc8a3, Pcdh11x, Upp2, Meg3, Samd4, Cntnap2, Tmem132b, Mctp1, Jakmip2, Dner, Cacnb4, Kif26b, D430041D05Rik, Naaladl2, Sgcz, Brinp1, Xkr6, Atp8a2, Stxbp1, Dnajc6, Brinp3, Rps2, Diaph2, Igsf8, Rpsa, Plcl1, Ubc, Ifitm3, Epas1, Cobll1, Rps4x, Actb, Rpl3, Cfl1, Cdc42, Spock2, ENSMUSG00000040904, Rps29, Rps24, B2m, Atp6v0c, Rap1a, R…	1619
GO:0046717	acid secretion	7	2	0.62	0.12316	0.12316	3dpi	BP	NonN_8	GO:0046717	Cacnb4, Grik1	144	Kcnb2, Rbfox3, Cdh18, Hs3st4, Grik1, Trhde, Dpp6, Sgcd, Pcdh10, Ntrk3, Slc8a3, Pcdh11x, Upp2, Meg3, Samd4, Cntnap2, Tmem132b, Mctp1, Jakmip2, Dner, Cacnb4, Kif26b, D430041D05Rik, Naaladl2, Sgcz, Brinp1, Xkr6, Atp8a2, Stxbp1, Dnajc6, Brinp3, Rps2, Diaph2, Igsf8, Rpsa, Plcl1, Ubc, Ifitm3, Epas1, Cobll1, Rps4x, Actb, Rpl3, Cfl1, Cdc42, Spock2, ENSMUSG00000040904, Rps29, Rps24, B2m, Atp6v0c, Rap1a, R…	1619
GO:0048266	behavioral response to pain	7	2	0.62	0.12316	0.12316	3dpi	BP	NonN_8	GO:0048266	Cntnap2, Grik1	144	Kcnb2, Rbfox3, Cdh18, Hs3st4, Grik1, Trhde, Dpp6, Sgcd, Pcdh10, Ntrk3, Slc8a3, Pcdh11x, Upp2, Meg3, Samd4, Cntnap2, Tmem132b, Mctp1, Jakmip2, Dner, Cacnb4, Kif26b, D430041D05Rik, Naaladl2, Sgcz, Brinp1, Xkr6, Atp8a2, Stxbp1, Dnajc6, Brinp3, Rps2, Diaph2, Igsf8, Rpsa, Plcl1, Ubc, Ifitm3, Epas1, Cobll1, Rps4x, Actb, Rpl3, Cfl1, Cdc42, Spock2, ENSMUSG00000040904, Rps29, Rps24, B2m, Atp6v0c, Rap1a, R…	1619
GO:0050810	regulation of steroid biosynthetic proce...	7	2	0.62	0.12316	0.12316	3dpi	BP	NonN_8	GO:0050810	Igfbp7, Pde8b	144	Kcnb2, Rbfox3, Cdh18, Hs3st4, Grik1, Trhde, Dpp6, Sgcd, Pcdh10, Ntrk3, Slc8a3, Pcdh11x, Upp2, Meg3, Samd4, Cntnap2, Tmem132b, Mctp1, Jakmip2, Dner, Cacnb4, Kif26b, D430041D05Rik, Naaladl2, Sgcz, Brinp1, Xkr6, Atp8a2, Stxbp1, Dnajc6, Brinp3, Rps2, Diaph2, Igsf8, Rpsa, Plcl1, Ubc, Ifitm3, Epas1, Cobll1, Rps4x, Actb, Rpl3, Cfl1, Cdc42, Spock2, ENSMUSG00000040904, Rps29, Rps24, B2m, Atp6v0c, Rap1a, R…	1619
GO:0051281	positive regulation of release of seques...	7	2	0.62	0.12316	0.12316	3dpi	BP	NonN_8	GO:0051281	Calm1, Calm2	144	Kcnb2, Rbfox3, Cdh18, Hs3st4, Grik1, Trhde, Dpp6, Sgcd, Pcdh10, Ntrk3, Slc8a3, Pcdh11x, Upp2, Meg3, Samd4, Cntnap2, Tmem132b, Mctp1, Jakmip2, Dner, Cacnb4, Kif26b, D430041D05Rik, Naaladl2, Sgcz, Brinp1, Xkr6, Atp8a2, Stxbp1, Dnajc6, Brinp3, Rps2, Diaph2, Igsf8, Rpsa, Plcl1, Ubc, Ifitm3, Epas1, Cobll1, Rps4x, Actb, Rpl3, Cfl1, Cdc42, Spock2, ENSMUSG00000040904, Rps29, Rps24, B2m, Atp6v0c, Rap1a, R…	1619
GO:1901292	nucleoside phosphate catabolic process	7	2	0.62	0.12316	0.12316	3dpi	BP	NonN_8	GO:1901292	Hint1, Upp2	144	Kcnb2, Rbfox3, Cdh18, Hs3st4, Grik1, Trhde, Dpp6, Sgcd, Pcdh10, Ntrk3, Slc8a3, Pcdh11x, Upp2, Meg3, Samd4, Cntnap2, Tmem132b, Mctp1, Jakmip2, Dner, Cacnb4, Kif26b, D430041D05Rik, Naaladl2, Sgcz, Brinp1, Xkr6, Atp8a2, Stxbp1, Dnajc6, Brinp3, Rps2, Diaph2, Igsf8, Rpsa, Plcl1, Ubc, Ifitm3, Epas1, Cobll1, Rps4x, Actb, Rpl3, Cfl1, Cdc42, Spock2, ENSMUSG00000040904, Rps29, Rps24, B2m, Atp6v0c, Rap1a, R…	1619
GO:1901385	regulation of voltage-gated calcium chan...	7	2	0.62	0.12316	0.12316	3dpi	BP	NonN_8	GO:1901385	Cacnb4, Calm1	144	Kcnb2, Rbfox3, Cdh18, Hs3st4, Grik1, Trhde, Dpp6, Sgcd, Pcdh10, Ntrk3, Slc8a3, Pcdh11x, Upp2, Meg3, Samd4, Cntnap2, Tmem132b, Mctp1, Jakmip2, Dner, Cacnb4, Kif26b, D430041D05Rik, Naaladl2, Sgcz, Brinp1, Xkr6, Atp8a2, Stxbp1, Dnajc6, Brinp3, Rps2, Diaph2, Igsf8, Rpsa, Plcl1, Ubc, Ifitm3, Epas1, Cobll1, Rps4x, Actb, Rpl3, Cfl1, Cdc42, Spock2, ENSMUSG00000040904, Rps29, Rps24, B2m, Atp6v0c, Rap1a, R…	1619
GO:1904029	regulation of cyclin-dependent protein k...	7	2	0.62	0.12316	0.12316	3dpi	BP	NonN_8	GO:1904029	Actb, Hsp90ab1	144	Kcnb2, Rbfox3, Cdh18, Hs3st4, Grik1, Trhde, Dpp6, Sgcd, Pcdh10, Ntrk3, Slc8a3, Pcdh11x, Upp2, Meg3, Samd4, Cntnap2, Tmem132b, Mctp1, Jakmip2, Dner, Cacnb4, Kif26b, D430041D05Rik, Naaladl2, Sgcz, Brinp1, Xkr6, Atp8a2, Stxbp1, Dnajc6, Brinp3, Rps2, Diaph2, Igsf8, Rpsa, Plcl1, Ubc, Ifitm3, Epas1, Cobll1, Rps4x, Actb, Rpl3, Cfl1, Cdc42, Spock2, ENSMUSG00000040904, Rps29, Rps24, B2m, Atp6v0c, Rap1a, R…	1619
GO:1905874	regulation of postsynaptic density organ...	7	2	0.62	0.12316	0.12316	3dpi	BP	NonN_8	GO:1905874	Cfl1, Ntrk3	144	Kcnb2, Rbfox3, Cdh18, Hs3st4, Grik1, Trhde, Dpp6, Sgcd, Pcdh10, Ntrk3, Slc8a3, Pcdh11x, Upp2, Meg3, Samd4, Cntnap2, Tmem132b, Mctp1, Jakmip2, Dner, Cacnb4, Kif26b, D430041D05Rik, Naaladl2, Sgcz, Brinp1, Xkr6, Atp8a2, Stxbp1, Dnajc6, Brinp3, Rps2, Diaph2, Igsf8, Rpsa, Plcl1, Ubc, Ifitm3, Epas1, Cobll1, Rps4x, Actb, Rpl3, Cfl1, Cdc42, Spock2, ENSMUSG00000040904, Rps29, Rps24, B2m, Atp6v0c, Rap1a, R…	1619
GO:0002703	regulation of leukocyte mediated immunit...	22	4	1.96	0.12568	0.12568	3dpi	BP	NonN_8	GO:0002703	B2m, Cd81, Ndfip1, Stxbp1	144	Kcnb2, Rbfox3, Cdh18, Hs3st4, Grik1, Trhde, Dpp6, Sgcd, Pcdh10, Ntrk3, Slc8a3, Pcdh11x, Upp2, Meg3, Samd4, Cntnap2, Tmem132b, Mctp1, Jakmip2, Dner, Cacnb4, Kif26b, D430041D05Rik, Naaladl2, Sgcz, Brinp1, Xkr6, Atp8a2, Stxbp1, Dnajc6, Brinp3, Rps2, Diaph2, Igsf8, Rpsa, Plcl1, Ubc, Ifitm3, Epas1, Cobll1, Rps4x, Actb, Rpl3, Cfl1, Cdc42, Spock2, ENSMUSG00000040904, Rps29, Rps24, B2m, Atp6v0c, Rap1a, R…	1619
GO:0006942	regulation of striated muscle contractio...	22	4	1.96	0.12568	0.12568	3dpi	BP	NonN_8	GO:0006942	Atp1a2, Calm1, Calm2, Slc8a3	144	Kcnb2, Rbfox3, Cdh18, Hs3st4, Grik1, Trhde, Dpp6, Sgcd, Pcdh10, Ntrk3, Slc8a3, Pcdh11x, Upp2, Meg3, Samd4, Cntnap2, Tmem132b, Mctp1, Jakmip2, Dner, Cacnb4, Kif26b, D430041D05Rik, Naaladl2, Sgcz, Brinp1, Xkr6, Atp8a2, Stxbp1, Dnajc6, Brinp3, Rps2, Diaph2, Igsf8, Rpsa, Plcl1, Ubc, Ifitm3, Epas1, Cobll1, Rps4x, Actb, Rpl3, Cfl1, Cdc42, Spock2, ENSMUSG00000040904, Rps29, Rps24, B2m, Atp6v0c, Rap1a, R…	1619
GO:0010811	positive regulation of cell-substrate ad...	22	4	1.96	0.12568	0.12568	3dpi	BP	NonN_8	GO:0010811	Cdc42, Cfl1, Ptn, Spock2	144	Kcnb2, Rbfox3, Cdh18, Hs3st4, Grik1, Trhde, Dpp6, Sgcd, Pcdh10, Ntrk3, Slc8a3, Pcdh11x, Upp2, Meg3, Samd4, Cntnap2, Tmem132b, Mctp1, Jakmip2, Dner, Cacnb4, Kif26b, D430041D05Rik, Naaladl2, Sgcz, Brinp1, Xkr6, Atp8a2, Stxbp1, Dnajc6, Brinp3, Rps2, Diaph2, Igsf8, Rpsa, Plcl1, Ubc, Ifitm3, Epas1, Cobll1, Rps4x, Actb, Rpl3, Cfl1, Cdc42, Spock2, ENSMUSG00000040904, Rps29, Rps24, B2m, Atp6v0c, Rap1a, R…	1619
GO:0019226	transmission of nerve impulse	22	4	1.96	0.12568	0.12568	3dpi	BP	NonN_8	GO:0019226	Cacnb4, Cntnap2, Dpp6, Ntrk3	144	Kcnb2, Rbfox3, Cdh18, Hs3st4, Grik1, Trhde, Dpp6, Sgcd, Pcdh10, Ntrk3, Slc8a3, Pcdh11x, Upp2, Meg3, Samd4, Cntnap2, Tmem132b, Mctp1, Jakmip2, Dner, Cacnb4, Kif26b, D430041D05Rik, Naaladl2, Sgcz, Brinp1, Xkr6, Atp8a2, Stxbp1, Dnajc6, Brinp3, Rps2, Diaph2, Igsf8, Rpsa, Plcl1, Ubc, Ifitm3, Epas1, Cobll1, Rps4x, Actb, Rpl3, Cfl1, Cdc42, Spock2, ENSMUSG00000040904, Rps29, Rps24, B2m, Atp6v0c, Rap1a, R…	1619
GO:0070663	regulation of leukocyte proliferation	22	4	1.96	0.12568	0.12568	3dpi	BP	NonN_8	GO:0070663	Cd81, Gstp1, Ndfip1, Rps3	144	Kcnb2, Rbfox3, Cdh18, Hs3st4, Grik1, Trhde, Dpp6, Sgcd, Pcdh10, Ntrk3, Slc8a3, Pcdh11x, Upp2, Meg3, Samd4, Cntnap2, Tmem132b, Mctp1, Jakmip2, Dner, Cacnb4, Kif26b, D430041D05Rik, Naaladl2, Sgcz, Brinp1, Xkr6, Atp8a2, Stxbp1, Dnajc6, Brinp3, Rps2, Diaph2, Igsf8, Rpsa, Plcl1, Ubc, Ifitm3, Epas1, Cobll1, Rps4x, Actb, Rpl3, Cfl1, Cdc42, Spock2, ENSMUSG00000040904, Rps29, Rps24, B2m, Atp6v0c, Rap1a, R…	1619
GO:0050801	ion homeostasis	104	13	9.27	0.12686	0.43517	3dpi	BP	NonN_8	GO:0050801	Atp1a2, Atp6v0c, B2m, Cacnb4, Calm1, Calm2, Ckb, Epas1, Ftl1, Mt1, Ndfip1, Sgcd, Slc8a3	144	Kcnb2, Rbfox3, Cdh18, Hs3st4, Grik1, Trhde, Dpp6, Sgcd, Pcdh10, Ntrk3, Slc8a3, Pcdh11x, Upp2, Meg3, Samd4, Cntnap2, Tmem132b, Mctp1, Jakmip2, Dner, Cacnb4, Kif26b, D430041D05Rik, Naaladl2, Sgcz, Brinp1, Xkr6, Atp8a2, Stxbp1, Dnajc6, Brinp3, Rps2, Diaph2, Igsf8, Rpsa, Plcl1, Ubc, Ifitm3, Epas1, Cobll1, Rps4x, Actb, Rpl3, Cfl1, Cdc42, Spock2, ENSMUSG00000040904, Rps29, Rps24, B2m, Atp6v0c, Rap1a, R…	1619
GO:0000003	reproduction	114	14	10.17	0.12885	0.12885	3dpi	BP	NonN_8	GO:0000003	Aldoa, Brinp1, Bsg, Diaph2, Epas1, Gpx4, H3f3b, Hsp90ab1, Pltp, Ptgds, Ptn, Septin7, Stxbp1, Ubb	144	Kcnb2, Rbfox3, Cdh18, Hs3st4, Grik1, Trhde, Dpp6, Sgcd, Pcdh10, Ntrk3, Slc8a3, Pcdh11x, Upp2, Meg3, Samd4, Cntnap2, Tmem132b, Mctp1, Jakmip2, Dner, Cacnb4, Kif26b, D430041D05Rik, Naaladl2, Sgcz, Brinp1, Xkr6, Atp8a2, Stxbp1, Dnajc6, Brinp3, Rps2, Diaph2, Igsf8, Rpsa, Plcl1, Ubc, Ifitm3, Epas1, Cobll1, Rps4x, Actb, Rpl3, Cfl1, Cdc42, Spock2, ENSMUSG00000040904, Rps29, Rps24, B2m, Atp6v0c, Rap1a, R…	1619
GO:0022414	reproductive process	114	14	10.17	0.12885	0.12885	3dpi	BP	NonN_8	GO:0022414	Aldoa, Brinp1, Bsg, Diaph2, Epas1, Gpx4, H3f3b, Hsp90ab1, Pltp, Ptgds, Ptn, Septin7, Stxbp1, Ubb	144	Kcnb2, Rbfox3, Cdh18, Hs3st4, Grik1, Trhde, Dpp6, Sgcd, Pcdh10, Ntrk3, Slc8a3, Pcdh11x, Upp2, Meg3, Samd4, Cntnap2, Tmem132b, Mctp1, Jakmip2, Dner, Cacnb4, Kif26b, D430041D05Rik, Naaladl2, Sgcz, Brinp1, Xkr6, Atp8a2, Stxbp1, Dnajc6, Brinp3, Rps2, Diaph2, Igsf8, Rpsa, Plcl1, Ubc, Ifitm3, Epas1, Cobll1, Rps4x, Actb, Rpl3, Cfl1, Cdc42, Spock2, ENSMUSG00000040904, Rps29, Rps24, B2m, Atp6v0c, Rap1a, R…	1619
GO:0044419	biological process involved in interspec...	105	13	9.36	0.13401	0.13401	3dpi	BP	NonN_8	GO:0044419	B2m, Bsg, Cdc42, Cfl1, Fau, Gstp1, Hsp90ab1, Ifitm3, Naaladl2, Prdx1, Rpl30, Rps15a, Stxbp1	144	Kcnb2, Rbfox3, Cdh18, Hs3st4, Grik1, Trhde, Dpp6, Sgcd, Pcdh10, Ntrk3, Slc8a3, Pcdh11x, Upp2, Meg3, Samd4, Cntnap2, Tmem132b, Mctp1, Jakmip2, Dner, Cacnb4, Kif26b, D430041D05Rik, Naaladl2, Sgcz, Brinp1, Xkr6, Atp8a2, Stxbp1, Dnajc6, Brinp3, Rps2, Diaph2, Igsf8, Rpsa, Plcl1, Ubc, Ifitm3, Epas1, Cobll1, Rps4x, Actb, Rpl3, Cfl1, Cdc42, Spock2, ENSMUSG00000040904, Rps29, Rps24, B2m, Atp6v0c, Rap1a, R…	1619
GO:0032411	positive regulation of transporter activ...	31	5	2.76	0.13556	0.13556	3dpi	BP	NonN_8	GO:0032411	Cacnb4, Calm1, Calm2, Cfl1, Ndufa4	144	Kcnb2, Rbfox3, Cdh18, Hs3st4, Grik1, Trhde, Dpp6, Sgcd, Pcdh10, Ntrk3, Slc8a3, Pcdh11x, Upp2, Meg3, Samd4, Cntnap2, Tmem132b, Mctp1, Jakmip2, Dner, Cacnb4, Kif26b, D430041D05Rik, Naaladl2, Sgcz, Brinp1, Xkr6, Atp8a2, Stxbp1, Dnajc6, Brinp3, Rps2, Diaph2, Igsf8, Rpsa, Plcl1, Ubc, Ifitm3, Epas1, Cobll1, Rps4x, Actb, Rpl3, Cfl1, Cdc42, Spock2, ENSMUSG00000040904, Rps29, Rps24, B2m, Atp6v0c, Rap1a, R…	1619
GO:0000278	mitotic cell cycle	86	11	7.67	0.13615	0.13615	3dpi	BP	NonN_8	GO:0000278	Brinp1, Brinp3, Cacnb4, Calm1, Calm2, Cdc42, Cfl1, Rpl17, Rpl24, Septin7, Tuba1a	144	Kcnb2, Rbfox3, Cdh18, Hs3st4, Grik1, Trhde, Dpp6, Sgcd, Pcdh10, Ntrk3, Slc8a3, Pcdh11x, Upp2, Meg3, Samd4, Cntnap2, Tmem132b, Mctp1, Jakmip2, Dner, Cacnb4, Kif26b, D430041D05Rik, Naaladl2, Sgcz, Brinp1, Xkr6, Atp8a2, Stxbp1, Dnajc6, Brinp3, Rps2, Diaph2, Igsf8, Rpsa, Plcl1, Ubc, Ifitm3, Epas1, Cobll1, Rps4x, Actb, Rpl3, Cfl1, Cdc42, Spock2, ENSMUSG00000040904, Rps29, Rps24, B2m, Atp6v0c, Rap1a, R…	1619
GO:0043270	positive regulation of ion transport	58	8	5.17	0.13800	0.13800	3dpi	BP	NonN_8	GO:0043270	Cacnb4, Calm1, Calm2, Cfl1, Dpp6, Grik1, Ndufa4, Stxbp1	144	Kcnb2, Rbfox3, Cdh18, Hs3st4, Grik1, Trhde, Dpp6, Sgcd, Pcdh10, Ntrk3, Slc8a3, Pcdh11x, Upp2, Meg3, Samd4, Cntnap2, Tmem132b, Mctp1, Jakmip2, Dner, Cacnb4, Kif26b, D430041D05Rik, Naaladl2, Sgcz, Brinp1, Xkr6, Atp8a2, Stxbp1, Dnajc6, Brinp3, Rps2, Diaph2, Igsf8, Rpsa, Plcl1, Ubc, Ifitm3, Epas1, Cobll1, Rps4x, Actb, Rpl3, Cfl1, Cdc42, Spock2, ENSMUSG00000040904, Rps29, Rps24, B2m, Atp6v0c, Rap1a, R…	1619
GO:0009150	purine ribonucleotide metabolic process	40	6	3.57	0.13920	0.13920	3dpi	BP	NonN_8	GO:0009150	Aldoa, Atp5j, Atp5j2, Cacnb4, Hint1, Ndufc2	144	Kcnb2, Rbfox3, Cdh18, Hs3st4, Grik1, Trhde, Dpp6, Sgcd, Pcdh10, Ntrk3, Slc8a3, Pcdh11x, Upp2, Meg3, Samd4, Cntnap2, Tmem132b, Mctp1, Jakmip2, Dner, Cacnb4, Kif26b, D430041D05Rik, Naaladl2, Sgcz, Brinp1, Xkr6, Atp8a2, Stxbp1, Dnajc6, Brinp3, Rps2, Diaph2, Igsf8, Rpsa, Plcl1, Ubc, Ifitm3, Epas1, Cobll1, Rps4x, Actb, Rpl3, Cfl1, Cdc42, Spock2, ENSMUSG00000040904, Rps29, Rps24, B2m, Atp6v0c, Rap1a, R…	1619
GO:0055080	cation homeostasis	96	12	8.56	0.13922	0.47907	3dpi	BP	NonN_8	GO:0055080	Atp1a2, Atp6v0c, B2m, Cacnb4, Calm1, Calm2, Epas1, Ftl1, Mt1, Ndfip1, Sgcd, Slc8a3	144	Kcnb2, Rbfox3, Cdh18, Hs3st4, Grik1, Trhde, Dpp6, Sgcd, Pcdh10, Ntrk3, Slc8a3, Pcdh11x, Upp2, Meg3, Samd4, Cntnap2, Tmem132b, Mctp1, Jakmip2, Dner, Cacnb4, Kif26b, D430041D05Rik, Naaladl2, Sgcz, Brinp1, Xkr6, Atp8a2, Stxbp1, Dnajc6, Brinp3, Rps2, Diaph2, Igsf8, Rpsa, Plcl1, Ubc, Ifitm3, Epas1, Cobll1, Rps4x, Actb, Rpl3, Cfl1, Cdc42, Spock2, ENSMUSG00000040904, Rps29, Rps24, B2m, Atp6v0c, Rap1a, R…	1619
GO:0006164	purine nucleotide biosynthetic process	23	4	2.05	0.14216	0.14216	3dpi	BP	NonN_8	GO:0006164	Aldoa, Atp5j, Atp5j2, Ndufc2	144	Kcnb2, Rbfox3, Cdh18, Hs3st4, Grik1, Trhde, Dpp6, Sgcd, Pcdh10, Ntrk3, Slc8a3, Pcdh11x, Upp2, Meg3, Samd4, Cntnap2, Tmem132b, Mctp1, Jakmip2, Dner, Cacnb4, Kif26b, D430041D05Rik, Naaladl2, Sgcz, Brinp1, Xkr6, Atp8a2, Stxbp1, Dnajc6, Brinp3, Rps2, Diaph2, Igsf8, Rpsa, Plcl1, Ubc, Ifitm3, Epas1, Cobll1, Rps4x, Actb, Rpl3, Cfl1, Cdc42, Spock2, ENSMUSG00000040904, Rps29, Rps24, B2m, Atp6v0c, Rap1a, R…	1619
GO:0009152	purine ribonucleotide biosynthetic proce...	23	4	2.05	0.14216	0.14216	3dpi	BP	NonN_8	GO:0009152	Aldoa, Atp5j, Atp5j2, Ndufc2	144	Kcnb2, Rbfox3, Cdh18, Hs3st4, Grik1, Trhde, Dpp6, Sgcd, Pcdh10, Ntrk3, Slc8a3, Pcdh11x, Upp2, Meg3, Samd4, Cntnap2, Tmem132b, Mctp1, Jakmip2, Dner, Cacnb4, Kif26b, D430041D05Rik, Naaladl2, Sgcz, Brinp1, Xkr6, Atp8a2, Stxbp1, Dnajc6, Brinp3, Rps2, Diaph2, Igsf8, Rpsa, Plcl1, Ubc, Ifitm3, Epas1, Cobll1, Rps4x, Actb, Rpl3, Cfl1, Cdc42, Spock2, ENSMUSG00000040904, Rps29, Rps24, B2m, Atp6v0c, Rap1a, R…	1619
GO:0009260	ribonucleotide biosynthetic process	23	4	2.05	0.14216	0.14216	3dpi	BP	NonN_8	GO:0009260	Aldoa, Atp5j, Atp5j2, Ndufc2	144	Kcnb2, Rbfox3, Cdh18, Hs3st4, Grik1, Trhde, Dpp6, Sgcd, Pcdh10, Ntrk3, Slc8a3, Pcdh11x, Upp2, Meg3, Samd4, Cntnap2, Tmem132b, Mctp1, Jakmip2, Dner, Cacnb4, Kif26b, D430041D05Rik, Naaladl2, Sgcz, Brinp1, Xkr6, Atp8a2, Stxbp1, Dnajc6, Brinp3, Rps2, Diaph2, Igsf8, Rpsa, Plcl1, Ubc, Ifitm3, Epas1, Cobll1, Rps4x, Actb, Rpl3, Cfl1, Cdc42, Spock2, ENSMUSG00000040904, Rps29, Rps24, B2m, Atp6v0c, Rap1a, R…	1619
GO:0009612	response to mechanical stimulus	23	4	2.05	0.14216	1.00000	3dpi	BP	NonN_8	GO:0009612	Atp1a2, Atp8a2, Cntnap2, Ptn	144	Kcnb2, Rbfox3, Cdh18, Hs3st4, Grik1, Trhde, Dpp6, Sgcd, Pcdh10, Ntrk3, Slc8a3, Pcdh11x, Upp2, Meg3, Samd4, Cntnap2, Tmem132b, Mctp1, Jakmip2, Dner, Cacnb4, Kif26b, D430041D05Rik, Naaladl2, Sgcz, Brinp1, Xkr6, Atp8a2, Stxbp1, Dnajc6, Brinp3, Rps2, Diaph2, Igsf8, Rpsa, Plcl1, Ubc, Ifitm3, Epas1, Cobll1, Rps4x, Actb, Rpl3, Cfl1, Cdc42, Spock2, ENSMUSG00000040904, Rps29, Rps24, B2m, Atp6v0c, Rap1a, R…	1619
GO:0032872	regulation of stress-activated MAPK casc...	23	4	2.05	0.14216	0.14216	3dpi	BP	NonN_8	GO:0032872	Cdc42, Gstp1, Ppia, Prdx1	144	Kcnb2, Rbfox3, Cdh18, Hs3st4, Grik1, Trhde, Dpp6, Sgcd, Pcdh10, Ntrk3, Slc8a3, Pcdh11x, Upp2, Meg3, Samd4, Cntnap2, Tmem132b, Mctp1, Jakmip2, Dner, Cacnb4, Kif26b, D430041D05Rik, Naaladl2, Sgcz, Brinp1, Xkr6, Atp8a2, Stxbp1, Dnajc6, Brinp3, Rps2, Diaph2, Igsf8, Rpsa, Plcl1, Ubc, Ifitm3, Epas1, Cobll1, Rps4x, Actb, Rpl3, Cfl1, Cdc42, Spock2, ENSMUSG00000040904, Rps29, Rps24, B2m, Atp6v0c, Rap1a, R…	1619
GO:0072522	purine-containing compound biosynthetic ...	23	4	2.05	0.14216	0.14216	3dpi	BP	NonN_8	GO:0072522	Aldoa, Atp5j, Atp5j2, Ndufc2	144	Kcnb2, Rbfox3, Cdh18, Hs3st4, Grik1, Trhde, Dpp6, Sgcd, Pcdh10, Ntrk3, Slc8a3, Pcdh11x, Upp2, Meg3, Samd4, Cntnap2, Tmem132b, Mctp1, Jakmip2, Dner, Cacnb4, Kif26b, D430041D05Rik, Naaladl2, Sgcz, Brinp1, Xkr6, Atp8a2, Stxbp1, Dnajc6, Brinp3, Rps2, Diaph2, Igsf8, Rpsa, Plcl1, Ubc, Ifitm3, Epas1, Cobll1, Rps4x, Actb, Rpl3, Cfl1, Cdc42, Spock2, ENSMUSG00000040904, Rps29, Rps24, B2m, Atp6v0c, Rap1a, R…	1619
GO:0002700	regulation of production of molecular me...	15	3	1.34	0.14306	0.14306	3dpi	BP	NonN_8	GO:0002700	B2m, Cd81, Ndfip1	144	Kcnb2, Rbfox3, Cdh18, Hs3st4, Grik1, Trhde, Dpp6, Sgcd, Pcdh10, Ntrk3, Slc8a3, Pcdh11x, Upp2, Meg3, Samd4, Cntnap2, Tmem132b, Mctp1, Jakmip2, Dner, Cacnb4, Kif26b, D430041D05Rik, Naaladl2, Sgcz, Brinp1, Xkr6, Atp8a2, Stxbp1, Dnajc6, Brinp3, Rps2, Diaph2, Igsf8, Rpsa, Plcl1, Ubc, Ifitm3, Epas1, Cobll1, Rps4x, Actb, Rpl3, Cfl1, Cdc42, Spock2, ENSMUSG00000040904, Rps29, Rps24, B2m, Atp6v0c, Rap1a, R…	1619
GO:0002822	regulation of adaptive immune response b...	15	3	1.34	0.14306	0.14306	3dpi	BP	NonN_8	GO:0002822	B2m, Cd81, Ndfip1	144	Kcnb2, Rbfox3, Cdh18, Hs3st4, Grik1, Trhde, Dpp6, Sgcd, Pcdh10, Ntrk3, Slc8a3, Pcdh11x, Upp2, Meg3, Samd4, Cntnap2, Tmem132b, Mctp1, Jakmip2, Dner, Cacnb4, Kif26b, D430041D05Rik, Naaladl2, Sgcz, Brinp1, Xkr6, Atp8a2, Stxbp1, Dnajc6, Brinp3, Rps2, Diaph2, Igsf8, Rpsa, Plcl1, Ubc, Ifitm3, Epas1, Cobll1, Rps4x, Actb, Rpl3, Cfl1, Cdc42, Spock2, ENSMUSG00000040904, Rps29, Rps24, B2m, Atp6v0c, Rap1a, R…	1619
GO:0009566	fertilization	15	3	1.34	0.14306	0.14306	3dpi	BP	NonN_8	GO:0009566	Aldoa, H3f3b, Stxbp1	144	Kcnb2, Rbfox3, Cdh18, Hs3st4, Grik1, Trhde, Dpp6, Sgcd, Pcdh10, Ntrk3, Slc8a3, Pcdh11x, Upp2, Meg3, Samd4, Cntnap2, Tmem132b, Mctp1, Jakmip2, Dner, Cacnb4, Kif26b, D430041D05Rik, Naaladl2, Sgcz, Brinp1, Xkr6, Atp8a2, Stxbp1, Dnajc6, Brinp3, Rps2, Diaph2, Igsf8, Rpsa, Plcl1, Ubc, Ifitm3, Epas1, Cobll1, Rps4x, Actb, Rpl3, Cfl1, Cdc42, Spock2, ENSMUSG00000040904, Rps29, Rps24, B2m, Atp6v0c, Rap1a, R…	1619
GO:0031398	positive regulation of protein ubiquitin...	15	3	1.34	0.14306	0.14306	3dpi	BP	NonN_8	GO:0031398	Ndfip1, Rps2, Ubb	144	Kcnb2, Rbfox3, Cdh18, Hs3st4, Grik1, Trhde, Dpp6, Sgcd, Pcdh10, Ntrk3, Slc8a3, Pcdh11x, Upp2, Meg3, Samd4, Cntnap2, Tmem132b, Mctp1, Jakmip2, Dner, Cacnb4, Kif26b, D430041D05Rik, Naaladl2, Sgcz, Brinp1, Xkr6, Atp8a2, Stxbp1, Dnajc6, Brinp3, Rps2, Diaph2, Igsf8, Rpsa, Plcl1, Ubc, Ifitm3, Epas1, Cobll1, Rps4x, Actb, Rpl3, Cfl1, Cdc42, Spock2, ENSMUSG00000040904, Rps29, Rps24, B2m, Atp6v0c, Rap1a, R…	1619
GO:0032413	negative regulation of ion transmembrane...	15	3	1.34	0.14306	0.14306	3dpi	BP	NonN_8	GO:0032413	Atp1a2, Calm1, Calm2	144	Kcnb2, Rbfox3, Cdh18, Hs3st4, Grik1, Trhde, Dpp6, Sgcd, Pcdh10, Ntrk3, Slc8a3, Pcdh11x, Upp2, Meg3, Samd4, Cntnap2, Tmem132b, Mctp1, Jakmip2, Dner, Cacnb4, Kif26b, D430041D05Rik, Naaladl2, Sgcz, Brinp1, Xkr6, Atp8a2, Stxbp1, Dnajc6, Brinp3, Rps2, Diaph2, Igsf8, Rpsa, Plcl1, Ubc, Ifitm3, Epas1, Cobll1, Rps4x, Actb, Rpl3, Cfl1, Cdc42, Spock2, ENSMUSG00000040904, Rps29, Rps24, B2m, Atp6v0c, Rap1a, R…	1619
GO:0044703	multi-organism reproductive process	78	10	6.96	0.14951	0.14951	3dpi	BP	NonN_8	GO:0044703	Aldoa, Bsg, Diaph2, Gpx4, H3f3b, Ptgds, Ptn, Septin7, Stxbp1, Ubb	144	Kcnb2, Rbfox3, Cdh18, Hs3st4, Grik1, Trhde, Dpp6, Sgcd, Pcdh10, Ntrk3, Slc8a3, Pcdh11x, Upp2, Meg3, Samd4, Cntnap2, Tmem132b, Mctp1, Jakmip2, Dner, Cacnb4, Kif26b, D430041D05Rik, Naaladl2, Sgcz, Brinp1, Xkr6, Atp8a2, Stxbp1, Dnajc6, Brinp3, Rps2, Diaph2, Igsf8, Rpsa, Plcl1, Ubc, Ifitm3, Epas1, Cobll1, Rps4x, Actb, Rpl3, Cfl1, Cdc42, Spock2, ENSMUSG00000040904, Rps29, Rps24, B2m, Atp6v0c, Rap1a, R…	1619
GO:0009416	response to light stimulus	32	5	2.85	0.14979	0.14979	3dpi	BP	NonN_8	GO:0009416	Atp1a2, Atp8a2, Cacnb4, Cntnap2, Pde8b	144	Kcnb2, Rbfox3, Cdh18, Hs3st4, Grik1, Trhde, Dpp6, Sgcd, Pcdh10, Ntrk3, Slc8a3, Pcdh11x, Upp2, Meg3, Samd4, Cntnap2, Tmem132b, Mctp1, Jakmip2, Dner, Cacnb4, Kif26b, D430041D05Rik, Naaladl2, Sgcz, Brinp1, Xkr6, Atp8a2, Stxbp1, Dnajc6, Brinp3, Rps2, Diaph2, Igsf8, Rpsa, Plcl1, Ubc, Ifitm3, Epas1, Cobll1, Rps4x, Actb, Rpl3, Cfl1, Cdc42, Spock2, ENSMUSG00000040904, Rps29, Rps24, B2m, Atp6v0c, Rap1a, R…	1619
GO:0046928	regulation of neurotransmitter secretion	32	5	2.85	0.14979	0.14979	3dpi	BP	NonN_8	GO:0046928	Cacnb4, Calm1, Mctp1, Rap1a, Stxbp1	144	Kcnb2, Rbfox3, Cdh18, Hs3st4, Grik1, Trhde, Dpp6, Sgcd, Pcdh10, Ntrk3, Slc8a3, Pcdh11x, Upp2, Meg3, Samd4, Cntnap2, Tmem132b, Mctp1, Jakmip2, Dner, Cacnb4, Kif26b, D430041D05Rik, Naaladl2, Sgcz, Brinp1, Xkr6, Atp8a2, Stxbp1, Dnajc6, Brinp3, Rps2, Diaph2, Igsf8, Rpsa, Plcl1, Ubc, Ifitm3, Epas1, Cobll1, Rps4x, Actb, Rpl3, Cfl1, Cdc42, Spock2, ENSMUSG00000040904, Rps29, Rps24, B2m, Atp6v0c, Rap1a, R…	1619
GO:0051588	regulation of neurotransmitter transport	32	5	2.85	0.14979	0.14979	3dpi	BP	NonN_8	GO:0051588	Cacnb4, Calm1, Mctp1, Rap1a, Stxbp1	144	Kcnb2, Rbfox3, Cdh18, Hs3st4, Grik1, Trhde, Dpp6, Sgcd, Pcdh10, Ntrk3, Slc8a3, Pcdh11x, Upp2, Meg3, Samd4, Cntnap2, Tmem132b, Mctp1, Jakmip2, Dner, Cacnb4, Kif26b, D430041D05Rik, Naaladl2, Sgcz, Brinp1, Xkr6, Atp8a2, Stxbp1, Dnajc6, Brinp3, Rps2, Diaph2, Igsf8, Rpsa, Plcl1, Ubc, Ifitm3, Epas1, Cobll1, Rps4x, Actb, Rpl3, Cfl1, Cdc42, Spock2, ENSMUSG00000040904, Rps29, Rps24, B2m, Atp6v0c, Rap1a, R…	1619
GO:1903362	regulation of cellular protein catabolic...	32	5	2.85	0.14979	0.14979	3dpi	BP	NonN_8	GO:1903362	Cd81, Hsp90ab1, Rpl11, Rpl23, Ubb	144	Kcnb2, Rbfox3, Cdh18, Hs3st4, Grik1, Trhde, Dpp6, Sgcd, Pcdh10, Ntrk3, Slc8a3, Pcdh11x, Upp2, Meg3, Samd4, Cntnap2, Tmem132b, Mctp1, Jakmip2, Dner, Cacnb4, Kif26b, D430041D05Rik, Naaladl2, Sgcz, Brinp1, Xkr6, Atp8a2, Stxbp1, Dnajc6, Brinp3, Rps2, Diaph2, Igsf8, Rpsa, Plcl1, Ubc, Ifitm3, Epas1, Cobll1, Rps4x, Actb, Rpl3, Cfl1, Cdc42, Spock2, ENSMUSG00000040904, Rps29, Rps24, B2m, Atp6v0c, Rap1a, R…	1619
GO:0006954	inflammatory response	50	7	4.46	0.15082	0.15082	3dpi	BP	NonN_8	GO:0006954	Cd81, Cntnap2, Gpx4, Gstp1, Ndfip1, Ndufc2, Ptn	144	Kcnb2, Rbfox3, Cdh18, Hs3st4, Grik1, Trhde, Dpp6, Sgcd, Pcdh10, Ntrk3, Slc8a3, Pcdh11x, Upp2, Meg3, Samd4, Cntnap2, Tmem132b, Mctp1, Jakmip2, Dner, Cacnb4, Kif26b, D430041D05Rik, Naaladl2, Sgcz, Brinp1, Xkr6, Atp8a2, Stxbp1, Dnajc6, Brinp3, Rps2, Diaph2, Igsf8, Rpsa, Plcl1, Ubc, Ifitm3, Epas1, Cobll1, Rps4x, Actb, Rpl3, Cfl1, Cdc42, Spock2, ENSMUSG00000040904, Rps29, Rps24, B2m, Atp6v0c, Rap1a, R…	1619
GO:0006163	purine nucleotide metabolic process	41	6	3.66	0.15177	0.15177	3dpi	BP	NonN_8	GO:0006163	Aldoa, Atp5j, Atp5j2, Cacnb4, Hint1, Ndufc2	144	Kcnb2, Rbfox3, Cdh18, Hs3st4, Grik1, Trhde, Dpp6, Sgcd, Pcdh10, Ntrk3, Slc8a3, Pcdh11x, Upp2, Meg3, Samd4, Cntnap2, Tmem132b, Mctp1, Jakmip2, Dner, Cacnb4, Kif26b, D430041D05Rik, Naaladl2, Sgcz, Brinp1, Xkr6, Atp8a2, Stxbp1, Dnajc6, Brinp3, Rps2, Diaph2, Igsf8, Rpsa, Plcl1, Ubc, Ifitm3, Epas1, Cobll1, Rps4x, Actb, Rpl3, Cfl1, Cdc42, Spock2, ENSMUSG00000040904, Rps29, Rps24, B2m, Atp6v0c, Rap1a, R…	1619
GO:1903829	positive regulation of cellular protein ...	41	6	3.66	0.15177	0.15177	3dpi	BP	NonN_8	GO:1903829	Cacnb4, Cd81, Cfl1, Dpp6, Hsp90ab1, Ptn	144	Kcnb2, Rbfox3, Cdh18, Hs3st4, Grik1, Trhde, Dpp6, Sgcd, Pcdh10, Ntrk3, Slc8a3, Pcdh11x, Upp2, Meg3, Samd4, Cntnap2, Tmem132b, Mctp1, Jakmip2, Dner, Cacnb4, Kif26b, D430041D05Rik, Naaladl2, Sgcz, Brinp1, Xkr6, Atp8a2, Stxbp1, Dnajc6, Brinp3, Rps2, Diaph2, Igsf8, Rpsa, Plcl1, Ubc, Ifitm3, Epas1, Cobll1, Rps4x, Actb, Rpl3, Cfl1, Cdc42, Spock2, ENSMUSG00000040904, Rps29, Rps24, B2m, Atp6v0c, Rap1a, R…	1619
GO:0001676	long-chain fatty acid metabolic process	8	2	0.71	0.15495	0.15495	3dpi	BP	NonN_8	GO:0001676	Gpx4, Gstp1	144	Kcnb2, Rbfox3, Cdh18, Hs3st4, Grik1, Trhde, Dpp6, Sgcd, Pcdh10, Ntrk3, Slc8a3, Pcdh11x, Upp2, Meg3, Samd4, Cntnap2, Tmem132b, Mctp1, Jakmip2, Dner, Cacnb4, Kif26b, D430041D05Rik, Naaladl2, Sgcz, Brinp1, Xkr6, Atp8a2, Stxbp1, Dnajc6, Brinp3, Rps2, Diaph2, Igsf8, Rpsa, Plcl1, Ubc, Ifitm3, Epas1, Cobll1, Rps4x, Actb, Rpl3, Cfl1, Cdc42, Spock2, ENSMUSG00000040904, Rps29, Rps24, B2m, Atp6v0c, Rap1a, R…	1619
GO:0002377	immunoglobulin production	8	2	0.71	0.15495	0.15495	3dpi	BP	NonN_8	GO:0002377	B2m, Ndfip1	144	Kcnb2, Rbfox3, Cdh18, Hs3st4, Grik1, Trhde, Dpp6, Sgcd, Pcdh10, Ntrk3, Slc8a3, Pcdh11x, Upp2, Meg3, Samd4, Cntnap2, Tmem132b, Mctp1, Jakmip2, Dner, Cacnb4, Kif26b, D430041D05Rik, Naaladl2, Sgcz, Brinp1, Xkr6, Atp8a2, Stxbp1, Dnajc6, Brinp3, Rps2, Diaph2, Igsf8, Rpsa, Plcl1, Ubc, Ifitm3, Epas1, Cobll1, Rps4x, Actb, Rpl3, Cfl1, Cdc42, Spock2, ENSMUSG00000040904, Rps29, Rps24, B2m, Atp6v0c, Rap1a, R…	1619
GO:0006692	prostanoid metabolic process	8	2	0.71	0.15495	0.15495	3dpi	BP	NonN_8	GO:0006692	Gstp1, Ptgds	144	Kcnb2, Rbfox3, Cdh18, Hs3st4, Grik1, Trhde, Dpp6, Sgcd, Pcdh10, Ntrk3, Slc8a3, Pcdh11x, Upp2, Meg3, Samd4, Cntnap2, Tmem132b, Mctp1, Jakmip2, Dner, Cacnb4, Kif26b, D430041D05Rik, Naaladl2, Sgcz, Brinp1, Xkr6, Atp8a2, Stxbp1, Dnajc6, Brinp3, Rps2, Diaph2, Igsf8, Rpsa, Plcl1, Ubc, Ifitm3, Epas1, Cobll1, Rps4x, Actb, Rpl3, Cfl1, Cdc42, Spock2, ENSMUSG00000040904, Rps29, Rps24, B2m, Atp6v0c, Rap1a, R…	1619
GO:0006693	prostaglandin metabolic process	8	2	0.71	0.15495	0.15495	3dpi	BP	NonN_8	GO:0006693	Gstp1, Ptgds	144	Kcnb2, Rbfox3, Cdh18, Hs3st4, Grik1, Trhde, Dpp6, Sgcd, Pcdh10, Ntrk3, Slc8a3, Pcdh11x, Upp2, Meg3, Samd4, Cntnap2, Tmem132b, Mctp1, Jakmip2, Dner, Cacnb4, Kif26b, D430041D05Rik, Naaladl2, Sgcz, Brinp1, Xkr6, Atp8a2, Stxbp1, Dnajc6, Brinp3, Rps2, Diaph2, Igsf8, Rpsa, Plcl1, Ubc, Ifitm3, Epas1, Cobll1, Rps4x, Actb, Rpl3, Cfl1, Cdc42, Spock2, ENSMUSG00000040904, Rps29, Rps24, B2m, Atp6v0c, Rap1a, R…	1619
GO:0006801	superoxide metabolic process	8	2	0.71	0.15495	0.15495	3dpi	BP	NonN_8	GO:0006801	Gstp1, Prdx1	144	Kcnb2, Rbfox3, Cdh18, Hs3st4, Grik1, Trhde, Dpp6, Sgcd, Pcdh10, Ntrk3, Slc8a3, Pcdh11x, Upp2, Meg3, Samd4, Cntnap2, Tmem132b, Mctp1, Jakmip2, Dner, Cacnb4, Kif26b, D430041D05Rik, Naaladl2, Sgcz, Brinp1, Xkr6, Atp8a2, Stxbp1, Dnajc6, Brinp3, Rps2, Diaph2, Igsf8, Rpsa, Plcl1, Ubc, Ifitm3, Epas1, Cobll1, Rps4x, Actb, Rpl3, Cfl1, Cdc42, Spock2, ENSMUSG00000040904, Rps29, Rps24, B2m, Atp6v0c, Rap1a, R…	1619
GO:0009408	response to heat	8	2	0.71	0.15495	0.15495	3dpi	BP	NonN_8	GO:0009408	Cntnap2, Hsp90ab1	144	Kcnb2, Rbfox3, Cdh18, Hs3st4, Grik1, Trhde, Dpp6, Sgcd, Pcdh10, Ntrk3, Slc8a3, Pcdh11x, Upp2, Meg3, Samd4, Cntnap2, Tmem132b, Mctp1, Jakmip2, Dner, Cacnb4, Kif26b, D430041D05Rik, Naaladl2, Sgcz, Brinp1, Xkr6, Atp8a2, Stxbp1, Dnajc6, Brinp3, Rps2, Diaph2, Igsf8, Rpsa, Plcl1, Ubc, Ifitm3, Epas1, Cobll1, Rps4x, Actb, Rpl3, Cfl1, Cdc42, Spock2, ENSMUSG00000040904, Rps29, Rps24, B2m, Atp6v0c, Rap1a, R…	1619
GO:0015812	gamma-aminobutyric acid transport	8	2	0.71	0.15495	0.15495	3dpi	BP	NonN_8	GO:0015812	Cacnb4, Grik1	144	Kcnb2, Rbfox3, Cdh18, Hs3st4, Grik1, Trhde, Dpp6, Sgcd, Pcdh10, Ntrk3, Slc8a3, Pcdh11x, Upp2, Meg3, Samd4, Cntnap2, Tmem132b, Mctp1, Jakmip2, Dner, Cacnb4, Kif26b, D430041D05Rik, Naaladl2, Sgcz, Brinp1, Xkr6, Atp8a2, Stxbp1, Dnajc6, Brinp3, Rps2, Diaph2, Igsf8, Rpsa, Plcl1, Ubc, Ifitm3, Epas1, Cobll1, Rps4x, Actb, Rpl3, Cfl1, Cdc42, Spock2, ENSMUSG00000040904, Rps29, Rps24, B2m, Atp6v0c, Rap1a, R…	1619
GO:0015985	energy coupled proton transport, down el...	8	2	0.71	0.15495	0.15495	3dpi	BP	NonN_8	GO:0015985	Atp5j, Atp5j2	144	Kcnb2, Rbfox3, Cdh18, Hs3st4, Grik1, Trhde, Dpp6, Sgcd, Pcdh10, Ntrk3, Slc8a3, Pcdh11x, Upp2, Meg3, Samd4, Cntnap2, Tmem132b, Mctp1, Jakmip2, Dner, Cacnb4, Kif26b, D430041D05Rik, Naaladl2, Sgcz, Brinp1, Xkr6, Atp8a2, Stxbp1, Dnajc6, Brinp3, Rps2, Diaph2, Igsf8, Rpsa, Plcl1, Ubc, Ifitm3, Epas1, Cobll1, Rps4x, Actb, Rpl3, Cfl1, Cdc42, Spock2, ENSMUSG00000040904, Rps29, Rps24, B2m, Atp6v0c, Rap1a, R…	1619
GO:0015986	ATP synthesis coupled proton transport	8	2	0.71	0.15495	0.15495	3dpi	BP	NonN_8	GO:0015986	Atp5j, Atp5j2	144	Kcnb2, Rbfox3, Cdh18, Hs3st4, Grik1, Trhde, Dpp6, Sgcd, Pcdh10, Ntrk3, Slc8a3, Pcdh11x, Upp2, Meg3, Samd4, Cntnap2, Tmem132b, Mctp1, Jakmip2, Dner, Cacnb4, Kif26b, D430041D05Rik, Naaladl2, Sgcz, Brinp1, Xkr6, Atp8a2, Stxbp1, Dnajc6, Brinp3, Rps2, Diaph2, Igsf8, Rpsa, Plcl1, Ubc, Ifitm3, Epas1, Cobll1, Rps4x, Actb, Rpl3, Cfl1, Cdc42, Spock2, ENSMUSG00000040904, Rps29, Rps24, B2m, Atp6v0c, Rap1a, R…	1619
GO:0032147	activation of protein kinase activity	8	2	0.71	0.15495	0.15495	3dpi	BP	NonN_8	GO:0032147	Ntrk3, Ppia	144	Kcnb2, Rbfox3, Cdh18, Hs3st4, Grik1, Trhde, Dpp6, Sgcd, Pcdh10, Ntrk3, Slc8a3, Pcdh11x, Upp2, Meg3, Samd4, Cntnap2, Tmem132b, Mctp1, Jakmip2, Dner, Cacnb4, Kif26b, D430041D05Rik, Naaladl2, Sgcz, Brinp1, Xkr6, Atp8a2, Stxbp1, Dnajc6, Brinp3, Rps2, Diaph2, Igsf8, Rpsa, Plcl1, Ubc, Ifitm3, Epas1, Cobll1, Rps4x, Actb, Rpl3, Cfl1, Cdc42, Spock2, ENSMUSG00000040904, Rps29, Rps24, B2m, Atp6v0c, Rap1a, R…	1619
GO:0032370	positive regulation of lipid transport	8	2	0.71	0.15495	0.15495	3dpi	BP	NonN_8	GO:0032370	Atp8a2, Pltp	144	Kcnb2, Rbfox3, Cdh18, Hs3st4, Grik1, Trhde, Dpp6, Sgcd, Pcdh10, Ntrk3, Slc8a3, Pcdh11x, Upp2, Meg3, Samd4, Cntnap2, Tmem132b, Mctp1, Jakmip2, Dner, Cacnb4, Kif26b, D430041D05Rik, Naaladl2, Sgcz, Brinp1, Xkr6, Atp8a2, Stxbp1, Dnajc6, Brinp3, Rps2, Diaph2, Igsf8, Rpsa, Plcl1, Ubc, Ifitm3, Epas1, Cobll1, Rps4x, Actb, Rpl3, Cfl1, Cdc42, Spock2, ENSMUSG00000040904, Rps29, Rps24, B2m, Atp6v0c, Rap1a, R…	1619
GO:0034204	lipid translocation	8	2	0.71	0.15495	0.15495	3dpi	BP	NonN_8	GO:0034204	Atp8a2, Xkr6	144	Kcnb2, Rbfox3, Cdh18, Hs3st4, Grik1, Trhde, Dpp6, Sgcd, Pcdh10, Ntrk3, Slc8a3, Pcdh11x, Upp2, Meg3, Samd4, Cntnap2, Tmem132b, Mctp1, Jakmip2, Dner, Cacnb4, Kif26b, D430041D05Rik, Naaladl2, Sgcz, Brinp1, Xkr6, Atp8a2, Stxbp1, Dnajc6, Brinp3, Rps2, Diaph2, Igsf8, Rpsa, Plcl1, Ubc, Ifitm3, Epas1, Cobll1, Rps4x, Actb, Rpl3, Cfl1, Cdc42, Spock2, ENSMUSG00000040904, Rps29, Rps24, B2m, Atp6v0c, Rap1a, R…	1619
GO:0048265	response to pain	8	2	0.71	0.15495	0.15495	3dpi	BP	NonN_8	GO:0048265	Cntnap2, Grik1	144	Kcnb2, Rbfox3, Cdh18, Hs3st4, Grik1, Trhde, Dpp6, Sgcd, Pcdh10, Ntrk3, Slc8a3, Pcdh11x, Upp2, Meg3, Samd4, Cntnap2, Tmem132b, Mctp1, Jakmip2, Dner, Cacnb4, Kif26b, D430041D05Rik, Naaladl2, Sgcz, Brinp1, Xkr6, Atp8a2, Stxbp1, Dnajc6, Brinp3, Rps2, Diaph2, Igsf8, Rpsa, Plcl1, Ubc, Ifitm3, Epas1, Cobll1, Rps4x, Actb, Rpl3, Cfl1, Cdc42, Spock2, ENSMUSG00000040904, Rps29, Rps24, B2m, Atp6v0c, Rap1a, R…	1619
GO:0048679	regulation of axon regeneration	8	2	0.71	0.15495	0.15495	3dpi	BP	NonN_8	GO:0048679	Ntrk3, Ptn	144	Kcnb2, Rbfox3, Cdh18, Hs3st4, Grik1, Trhde, Dpp6, Sgcd, Pcdh10, Ntrk3, Slc8a3, Pcdh11x, Upp2, Meg3, Samd4, Cntnap2, Tmem132b, Mctp1, Jakmip2, Dner, Cacnb4, Kif26b, D430041D05Rik, Naaladl2, Sgcz, Brinp1, Xkr6, Atp8a2, Stxbp1, Dnajc6, Brinp3, Rps2, Diaph2, Igsf8, Rpsa, Plcl1, Ubc, Ifitm3, Epas1, Cobll1, Rps4x, Actb, Rpl3, Cfl1, Cdc42, Spock2, ENSMUSG00000040904, Rps29, Rps24, B2m, Atp6v0c, Rap1a, R…	1619
GO:0051353	positive regulation of oxidoreductase ac...	8	2	0.71	0.15495	0.15495	3dpi	BP	NonN_8	GO:0051353	Calm1, Ndufa4	144	Kcnb2, Rbfox3, Cdh18, Hs3st4, Grik1, Trhde, Dpp6, Sgcd, Pcdh10, Ntrk3, Slc8a3, Pcdh11x, Upp2, Meg3, Samd4, Cntnap2, Tmem132b, Mctp1, Jakmip2, Dner, Cacnb4, Kif26b, D430041D05Rik, Naaladl2, Sgcz, Brinp1, Xkr6, Atp8a2, Stxbp1, Dnajc6, Brinp3, Rps2, Diaph2, Igsf8, Rpsa, Plcl1, Ubc, Ifitm3, Epas1, Cobll1, Rps4x, Actb, Rpl3, Cfl1, Cdc42, Spock2, ENSMUSG00000040904, Rps29, Rps24, B2m, Atp6v0c, Rap1a, R…	1619
GO:0070570	regulation of neuron projection regenera...	8	2	0.71	0.15495	0.15495	3dpi	BP	NonN_8	GO:0070570	Ntrk3, Ptn	144	Kcnb2, Rbfox3, Cdh18, Hs3st4, Grik1, Trhde, Dpp6, Sgcd, Pcdh10, Ntrk3, Slc8a3, Pcdh11x, Upp2, Meg3, Samd4, Cntnap2, Tmem132b, Mctp1, Jakmip2, Dner, Cacnb4, Kif26b, D430041D05Rik, Naaladl2, Sgcz, Brinp1, Xkr6, Atp8a2, Stxbp1, Dnajc6, Brinp3, Rps2, Diaph2, Igsf8, Rpsa, Plcl1, Ubc, Ifitm3, Epas1, Cobll1, Rps4x, Actb, Rpl3, Cfl1, Cdc42, Spock2, ENSMUSG00000040904, Rps29, Rps24, B2m, Atp6v0c, Rap1a, R…	1619
GO:0071300	cellular response to retinoic acid	8	2	0.71	0.15495	0.15495	3dpi	BP	NonN_8	GO:0071300	Brinp1, Brinp3	144	Kcnb2, Rbfox3, Cdh18, Hs3st4, Grik1, Trhde, Dpp6, Sgcd, Pcdh10, Ntrk3, Slc8a3, Pcdh11x, Upp2, Meg3, Samd4, Cntnap2, Tmem132b, Mctp1, Jakmip2, Dner, Cacnb4, Kif26b, D430041D05Rik, Naaladl2, Sgcz, Brinp1, Xkr6, Atp8a2, Stxbp1, Dnajc6, Brinp3, Rps2, Diaph2, Igsf8, Rpsa, Plcl1, Ubc, Ifitm3, Epas1, Cobll1, Rps4x, Actb, Rpl3, Cfl1, Cdc42, Spock2, ENSMUSG00000040904, Rps29, Rps24, B2m, Atp6v0c, Rap1a, R…	1619
GO:0071346	cellular response to interferon-gamma	8	2	0.71	0.15495	0.15495	3dpi	BP	NonN_8	GO:0071346	Cdc42, Stxbp1	144	Kcnb2, Rbfox3, Cdh18, Hs3st4, Grik1, Trhde, Dpp6, Sgcd, Pcdh10, Ntrk3, Slc8a3, Pcdh11x, Upp2, Meg3, Samd4, Cntnap2, Tmem132b, Mctp1, Jakmip2, Dner, Cacnb4, Kif26b, D430041D05Rik, Naaladl2, Sgcz, Brinp1, Xkr6, Atp8a2, Stxbp1, Dnajc6, Brinp3, Rps2, Diaph2, Igsf8, Rpsa, Plcl1, Ubc, Ifitm3, Epas1, Cobll1, Rps4x, Actb, Rpl3, Cfl1, Cdc42, Spock2, ENSMUSG00000040904, Rps29, Rps24, B2m, Atp6v0c, Rap1a, R…	1619
GO:0071625	vocalization behavior	8	2	0.71	0.15495	0.15495	3dpi	BP	NonN_8	GO:0071625	Brinp1, Cntnap2	144	Kcnb2, Rbfox3, Cdh18, Hs3st4, Grik1, Trhde, Dpp6, Sgcd, Pcdh10, Ntrk3, Slc8a3, Pcdh11x, Upp2, Meg3, Samd4, Cntnap2, Tmem132b, Mctp1, Jakmip2, Dner, Cacnb4, Kif26b, D430041D05Rik, Naaladl2, Sgcz, Brinp1, Xkr6, Atp8a2, Stxbp1, Dnajc6, Brinp3, Rps2, Diaph2, Igsf8, Rpsa, Plcl1, Ubc, Ifitm3, Epas1, Cobll1, Rps4x, Actb, Rpl3, Cfl1, Cdc42, Spock2, ENSMUSG00000040904, Rps29, Rps24, B2m, Atp6v0c, Rap1a, R…	1619
GO:0099010	modification of postsynaptic structure	8	2	0.71	0.15495	0.15495	3dpi	BP	NonN_8	GO:0099010	Cdc42, Cfl1	144	Kcnb2, Rbfox3, Cdh18, Hs3st4, Grik1, Trhde, Dpp6, Sgcd, Pcdh10, Ntrk3, Slc8a3, Pcdh11x, Upp2, Meg3, Samd4, Cntnap2, Tmem132b, Mctp1, Jakmip2, Dner, Cacnb4, Kif26b, D430041D05Rik, Naaladl2, Sgcz, Brinp1, Xkr6, Atp8a2, Stxbp1, Dnajc6, Brinp3, Rps2, Diaph2, Igsf8, Rpsa, Plcl1, Ubc, Ifitm3, Epas1, Cobll1, Rps4x, Actb, Rpl3, Cfl1, Cdc42, Spock2, ENSMUSG00000040904, Rps29, Rps24, B2m, Atp6v0c, Rap1a, R…	1619
GO:1905515	non-motile cilium assembly	8	2	0.71	0.15495	0.15495	3dpi	BP	NonN_8	GO:1905515	Dynll1, Septin7	144	Kcnb2, Rbfox3, Cdh18, Hs3st4, Grik1, Trhde, Dpp6, Sgcd, Pcdh10, Ntrk3, Slc8a3, Pcdh11x, Upp2, Meg3, Samd4, Cntnap2, Tmem132b, Mctp1, Jakmip2, Dner, Cacnb4, Kif26b, D430041D05Rik, Naaladl2, Sgcz, Brinp1, Xkr6, Atp8a2, Stxbp1, Dnajc6, Brinp3, Rps2, Diaph2, Igsf8, Rpsa, Plcl1, Ubc, Ifitm3, Epas1, Cobll1, Rps4x, Actb, Rpl3, Cfl1, Cdc42, Spock2, ENSMUSG00000040904, Rps29, Rps24, B2m, Atp6v0c, Rap1a, R…	1619
GO:0045785	positive regulation of cell adhesion	60	8	5.35	0.15883	0.15883	3dpi	BP	NonN_8	GO:0045785	B2m, Cd81, Cdc42, Cfl1, Kif26b, Ptn, Rps3, Spock2	144	Kcnb2, Rbfox3, Cdh18, Hs3st4, Grik1, Trhde, Dpp6, Sgcd, Pcdh10, Ntrk3, Slc8a3, Pcdh11x, Upp2, Meg3, Samd4, Cntnap2, Tmem132b, Mctp1, Jakmip2, Dner, Cacnb4, Kif26b, D430041D05Rik, Naaladl2, Sgcz, Brinp1, Xkr6, Atp8a2, Stxbp1, Dnajc6, Brinp3, Rps2, Diaph2, Igsf8, Rpsa, Plcl1, Ubc, Ifitm3, Epas1, Cobll1, Rps4x, Actb, Rpl3, Cfl1, Cdc42, Spock2, ENSMUSG00000040904, Rps29, Rps24, B2m, Atp6v0c, Rap1a, R…	1619
GO:0002449	lymphocyte mediated immunity	24	4	2.14	0.15945	0.15945	3dpi	BP	NonN_8	GO:0002449	B2m, Cd81, Ndfip1, Prdx1	144	Kcnb2, Rbfox3, Cdh18, Hs3st4, Grik1, Trhde, Dpp6, Sgcd, Pcdh10, Ntrk3, Slc8a3, Pcdh11x, Upp2, Meg3, Samd4, Cntnap2, Tmem132b, Mctp1, Jakmip2, Dner, Cacnb4, Kif26b, D430041D05Rik, Naaladl2, Sgcz, Brinp1, Xkr6, Atp8a2, Stxbp1, Dnajc6, Brinp3, Rps2, Diaph2, Igsf8, Rpsa, Plcl1, Ubc, Ifitm3, Epas1, Cobll1, Rps4x, Actb, Rpl3, Cfl1, Cdc42, Spock2, ENSMUSG00000040904, Rps29, Rps24, B2m, Atp6v0c, Rap1a, R…	1619
GO:0009165	nucleotide biosynthetic process	24	4	2.14	0.15945	0.15945	3dpi	BP	NonN_8	GO:0009165	Aldoa, Atp5j, Atp5j2, Ndufc2	144	Kcnb2, Rbfox3, Cdh18, Hs3st4, Grik1, Trhde, Dpp6, Sgcd, Pcdh10, Ntrk3, Slc8a3, Pcdh11x, Upp2, Meg3, Samd4, Cntnap2, Tmem132b, Mctp1, Jakmip2, Dner, Cacnb4, Kif26b, D430041D05Rik, Naaladl2, Sgcz, Brinp1, Xkr6, Atp8a2, Stxbp1, Dnajc6, Brinp3, Rps2, Diaph2, Igsf8, Rpsa, Plcl1, Ubc, Ifitm3, Epas1, Cobll1, Rps4x, Actb, Rpl3, Cfl1, Cdc42, Spock2, ENSMUSG00000040904, Rps29, Rps24, B2m, Atp6v0c, Rap1a, R…	1619
GO:0045786	negative regulation of cell cycle	24	4	2.14	0.15945	0.15945	3dpi	BP	NonN_8	GO:0045786	Brinp1, Brinp3, Cacnb4, Rpl24	144	Kcnb2, Rbfox3, Cdh18, Hs3st4, Grik1, Trhde, Dpp6, Sgcd, Pcdh10, Ntrk3, Slc8a3, Pcdh11x, Upp2, Meg3, Samd4, Cntnap2, Tmem132b, Mctp1, Jakmip2, Dner, Cacnb4, Kif26b, D430041D05Rik, Naaladl2, Sgcz, Brinp1, Xkr6, Atp8a2, Stxbp1, Dnajc6, Brinp3, Rps2, Diaph2, Igsf8, Rpsa, Plcl1, Ubc, Ifitm3, Epas1, Cobll1, Rps4x, Actb, Rpl3, Cfl1, Cdc42, Spock2, ENSMUSG00000040904, Rps29, Rps24, B2m, Atp6v0c, Rap1a, R…	1619
GO:0046390	ribose phosphate biosynthetic process	24	4	2.14	0.15945	0.15945	3dpi	BP	NonN_8	GO:0046390	Aldoa, Atp5j, Atp5j2, Ndufc2	144	Kcnb2, Rbfox3, Cdh18, Hs3st4, Grik1, Trhde, Dpp6, Sgcd, Pcdh10, Ntrk3, Slc8a3, Pcdh11x, Upp2, Meg3, Samd4, Cntnap2, Tmem132b, Mctp1, Jakmip2, Dner, Cacnb4, Kif26b, D430041D05Rik, Naaladl2, Sgcz, Brinp1, Xkr6, Atp8a2, Stxbp1, Dnajc6, Brinp3, Rps2, Diaph2, Igsf8, Rpsa, Plcl1, Ubc, Ifitm3, Epas1, Cobll1, Rps4x, Actb, Rpl3, Cfl1, Cdc42, Spock2, ENSMUSG00000040904, Rps29, Rps24, B2m, Atp6v0c, Rap1a, R…	1619
GO:1901293	nucleoside phosphate biosynthetic proces...	24	4	2.14	0.15945	0.15945	3dpi	BP	NonN_8	GO:1901293	Aldoa, Atp5j, Atp5j2, Ndufc2	144	Kcnb2, Rbfox3, Cdh18, Hs3st4, Grik1, Trhde, Dpp6, Sgcd, Pcdh10, Ntrk3, Slc8a3, Pcdh11x, Upp2, Meg3, Samd4, Cntnap2, Tmem132b, Mctp1, Jakmip2, Dner, Cacnb4, Kif26b, D430041D05Rik, Naaladl2, Sgcz, Brinp1, Xkr6, Atp8a2, Stxbp1, Dnajc6, Brinp3, Rps2, Diaph2, Igsf8, Rpsa, Plcl1, Ubc, Ifitm3, Epas1, Cobll1, Rps4x, Actb, Rpl3, Cfl1, Cdc42, Spock2, ENSMUSG00000040904, Rps29, Rps24, B2m, Atp6v0c, Rap1a, R…	1619
GO:0080135	regulation of cellular response to stres...	70	9	6.24	0.16439	0.16439	3dpi	BP	NonN_8	GO:0080135	B2m, Cdc42, Chchd2, Gstp1, Ntrk3, Ppia, Prdx1, Ptn, Rps3	144	Kcnb2, Rbfox3, Cdh18, Hs3st4, Grik1, Trhde, Dpp6, Sgcd, Pcdh10, Ntrk3, Slc8a3, Pcdh11x, Upp2, Meg3, Samd4, Cntnap2, Tmem132b, Mctp1, Jakmip2, Dner, Cacnb4, Kif26b, D430041D05Rik, Naaladl2, Sgcz, Brinp1, Xkr6, Atp8a2, Stxbp1, Dnajc6, Brinp3, Rps2, Diaph2, Igsf8, Rpsa, Plcl1, Ubc, Ifitm3, Epas1, Cobll1, Rps4x, Actb, Rpl3, Cfl1, Cdc42, Spock2, ENSMUSG00000040904, Rps29, Rps24, B2m, Atp6v0c, Rap1a, R…	1619
GO:0007159	leukocyte cell-cell adhesion	33	5	2.94	0.16462	0.16462	3dpi	BP	NonN_8	GO:0007159	B2m, Cd81, Gstp1, Ndfip1, Rps3	144	Kcnb2, Rbfox3, Cdh18, Hs3st4, Grik1, Trhde, Dpp6, Sgcd, Pcdh10, Ntrk3, Slc8a3, Pcdh11x, Upp2, Meg3, Samd4, Cntnap2, Tmem132b, Mctp1, Jakmip2, Dner, Cacnb4, Kif26b, D430041D05Rik, Naaladl2, Sgcz, Brinp1, Xkr6, Atp8a2, Stxbp1, Dnajc6, Brinp3, Rps2, Diaph2, Igsf8, Rpsa, Plcl1, Ubc, Ifitm3, Epas1, Cobll1, Rps4x, Actb, Rpl3, Cfl1, Cdc42, Spock2, ENSMUSG00000040904, Rps29, Rps24, B2m, Atp6v0c, Rap1a, R…	1619
GO:1904064	positive regulation of cation transmembr...	33	5	2.94	0.16462	0.16462	3dpi	BP	NonN_8	GO:1904064	Cacnb4, Calm1, Calm2, Cfl1, Dpp6	144	Kcnb2, Rbfox3, Cdh18, Hs3st4, Grik1, Trhde, Dpp6, Sgcd, Pcdh10, Ntrk3, Slc8a3, Pcdh11x, Upp2, Meg3, Samd4, Cntnap2, Tmem132b, Mctp1, Jakmip2, Dner, Cacnb4, Kif26b, D430041D05Rik, Naaladl2, Sgcz, Brinp1, Xkr6, Atp8a2, Stxbp1, Dnajc6, Brinp3, Rps2, Diaph2, Igsf8, Rpsa, Plcl1, Ubc, Ifitm3, Epas1, Cobll1, Rps4x, Actb, Rpl3, Cfl1, Cdc42, Spock2, ENSMUSG00000040904, Rps29, Rps24, B2m, Atp6v0c, Rap1a, R…	1619
GO:0007346	regulation of mitotic cell cycle	42	6	3.75	0.16483	0.16483	3dpi	BP	NonN_8	GO:0007346	Brinp1, Brinp3, Cacnb4, Cdc42, Rpl17, Rpl24	144	Kcnb2, Rbfox3, Cdh18, Hs3st4, Grik1, Trhde, Dpp6, Sgcd, Pcdh10, Ntrk3, Slc8a3, Pcdh11x, Upp2, Meg3, Samd4, Cntnap2, Tmem132b, Mctp1, Jakmip2, Dner, Cacnb4, Kif26b, D430041D05Rik, Naaladl2, Sgcz, Brinp1, Xkr6, Atp8a2, Stxbp1, Dnajc6, Brinp3, Rps2, Diaph2, Igsf8, Rpsa, Plcl1, Ubc, Ifitm3, Epas1, Cobll1, Rps4x, Actb, Rpl3, Cfl1, Cdc42, Spock2, ENSMUSG00000040904, Rps29, Rps24, B2m, Atp6v0c, Rap1a, R…	1619
GO:0072521	purine-containing compound metabolic pro...	42	6	3.75	0.16483	0.16483	3dpi	BP	NonN_8	GO:0072521	Aldoa, Atp5j, Atp5j2, Cacnb4, Hint1, Ndufc2	144	Kcnb2, Rbfox3, Cdh18, Hs3st4, Grik1, Trhde, Dpp6, Sgcd, Pcdh10, Ntrk3, Slc8a3, Pcdh11x, Upp2, Meg3, Samd4, Cntnap2, Tmem132b, Mctp1, Jakmip2, Dner, Cacnb4, Kif26b, D430041D05Rik, Naaladl2, Sgcz, Brinp1, Xkr6, Atp8a2, Stxbp1, Dnajc6, Brinp3, Rps2, Diaph2, Igsf8, Rpsa, Plcl1, Ubc, Ifitm3, Epas1, Cobll1, Rps4x, Actb, Rpl3, Cfl1, Cdc42, Spock2, ENSMUSG00000040904, Rps29, Rps24, B2m, Atp6v0c, Rap1a, R…	1619
GO:0019725	cellular homeostasis	109	13	9.72	0.16485	0.16485	3dpi	BP	NonN_8	GO:0019725	Aldoa, Atp1a2, Atp6v0c, Cacnb4, Calm1, Calm2, Ckb, Ftl1, Mt1, Ndfip1, Pde8b, Prdx1, Slc8a3	144	Kcnb2, Rbfox3, Cdh18, Hs3st4, Grik1, Trhde, Dpp6, Sgcd, Pcdh10, Ntrk3, Slc8a3, Pcdh11x, Upp2, Meg3, Samd4, Cntnap2, Tmem132b, Mctp1, Jakmip2, Dner, Cacnb4, Kif26b, D430041D05Rik, Naaladl2, Sgcz, Brinp1, Xkr6, Atp8a2, Stxbp1, Dnajc6, Brinp3, Rps2, Diaph2, Igsf8, Rpsa, Plcl1, Ubc, Ifitm3, Epas1, Cobll1, Rps4x, Actb, Rpl3, Cfl1, Cdc42, Spock2, ENSMUSG00000040904, Rps29, Rps24, B2m, Atp6v0c, Rap1a, R…	1619
GO:0002440	production of molecular mediator of immu...	16	3	1.43	0.16518	0.16518	3dpi	BP	NonN_8	GO:0002440	B2m, Cd81, Ndfip1	144	Kcnb2, Rbfox3, Cdh18, Hs3st4, Grik1, Trhde, Dpp6, Sgcd, Pcdh10, Ntrk3, Slc8a3, Pcdh11x, Upp2, Meg3, Samd4, Cntnap2, Tmem132b, Mctp1, Jakmip2, Dner, Cacnb4, Kif26b, D430041D05Rik, Naaladl2, Sgcz, Brinp1, Xkr6, Atp8a2, Stxbp1, Dnajc6, Brinp3, Rps2, Diaph2, Igsf8, Rpsa, Plcl1, Ubc, Ifitm3, Epas1, Cobll1, Rps4x, Actb, Rpl3, Cfl1, Cdc42, Spock2, ENSMUSG00000040904, Rps29, Rps24, B2m, Atp6v0c, Rap1a, R…	1619
GO:0002706	regulation of lymphocyte mediated immuni...	16	3	1.43	0.16518	0.16518	3dpi	BP	NonN_8	GO:0002706	B2m, Cd81, Ndfip1	144	Kcnb2, Rbfox3, Cdh18, Hs3st4, Grik1, Trhde, Dpp6, Sgcd, Pcdh10, Ntrk3, Slc8a3, Pcdh11x, Upp2, Meg3, Samd4, Cntnap2, Tmem132b, Mctp1, Jakmip2, Dner, Cacnb4, Kif26b, D430041D05Rik, Naaladl2, Sgcz, Brinp1, Xkr6, Atp8a2, Stxbp1, Dnajc6, Brinp3, Rps2, Diaph2, Igsf8, Rpsa, Plcl1, Ubc, Ifitm3, Epas1, Cobll1, Rps4x, Actb, Rpl3, Cfl1, Cdc42, Spock2, ENSMUSG00000040904, Rps29, Rps24, B2m, Atp6v0c, Rap1a, R…	1619
GO:0002819	regulation of adaptive immune response	16	3	1.43	0.16518	0.16518	3dpi	BP	NonN_8	GO:0002819	B2m, Cd81, Ndfip1	144	Kcnb2, Rbfox3, Cdh18, Hs3st4, Grik1, Trhde, Dpp6, Sgcd, Pcdh10, Ntrk3, Slc8a3, Pcdh11x, Upp2, Meg3, Samd4, Cntnap2, Tmem132b, Mctp1, Jakmip2, Dner, Cacnb4, Kif26b, D430041D05Rik, Naaladl2, Sgcz, Brinp1, Xkr6, Atp8a2, Stxbp1, Dnajc6, Brinp3, Rps2, Diaph2, Igsf8, Rpsa, Plcl1, Ubc, Ifitm3, Epas1, Cobll1, Rps4x, Actb, Rpl3, Cfl1, Cdc42, Spock2, ENSMUSG00000040904, Rps29, Rps24, B2m, Atp6v0c, Rap1a, R…	1619
GO:0015748	organophosphate ester transport	16	3	1.43	0.16518	0.16518	3dpi	BP	NonN_8	GO:0015748	Atp8a2, Pltp, Xkr6	144	Kcnb2, Rbfox3, Cdh18, Hs3st4, Grik1, Trhde, Dpp6, Sgcd, Pcdh10, Ntrk3, Slc8a3, Pcdh11x, Upp2, Meg3, Samd4, Cntnap2, Tmem132b, Mctp1, Jakmip2, Dner, Cacnb4, Kif26b, D430041D05Rik, Naaladl2, Sgcz, Brinp1, Xkr6, Atp8a2, Stxbp1, Dnajc6, Brinp3, Rps2, Diaph2, Igsf8, Rpsa, Plcl1, Ubc, Ifitm3, Epas1, Cobll1, Rps4x, Actb, Rpl3, Cfl1, Cdc42, Spock2, ENSMUSG00000040904, Rps29, Rps24, B2m, Atp6v0c, Rap1a, R…	1619
GO:0032890	regulation of organic acid transport	16	3	1.43	0.16518	0.16518	3dpi	BP	NonN_8	GO:0032890	Atp5j, Grik1, Stxbp1	144	Kcnb2, Rbfox3, Cdh18, Hs3st4, Grik1, Trhde, Dpp6, Sgcd, Pcdh10, Ntrk3, Slc8a3, Pcdh11x, Upp2, Meg3, Samd4, Cntnap2, Tmem132b, Mctp1, Jakmip2, Dner, Cacnb4, Kif26b, D430041D05Rik, Naaladl2, Sgcz, Brinp1, Xkr6, Atp8a2, Stxbp1, Dnajc6, Brinp3, Rps2, Diaph2, Igsf8, Rpsa, Plcl1, Ubc, Ifitm3, Epas1, Cobll1, Rps4x, Actb, Rpl3, Cfl1, Cdc42, Spock2, ENSMUSG00000040904, Rps29, Rps24, B2m, Atp6v0c, Rap1a, R…	1619
GO:0042177	negative regulation of protein catabolic...	16	3	1.43	0.16518	0.16518	3dpi	BP	NonN_8	GO:0042177	Hsp90ab1, Rpl11, Rpl23	144	Kcnb2, Rbfox3, Cdh18, Hs3st4, Grik1, Trhde, Dpp6, Sgcd, Pcdh10, Ntrk3, Slc8a3, Pcdh11x, Upp2, Meg3, Samd4, Cntnap2, Tmem132b, Mctp1, Jakmip2, Dner, Cacnb4, Kif26b, D430041D05Rik, Naaladl2, Sgcz, Brinp1, Xkr6, Atp8a2, Stxbp1, Dnajc6, Brinp3, Rps2, Diaph2, Igsf8, Rpsa, Plcl1, Ubc, Ifitm3, Epas1, Cobll1, Rps4x, Actb, Rpl3, Cfl1, Cdc42, Spock2, ENSMUSG00000040904, Rps29, Rps24, B2m, Atp6v0c, Rap1a, R…	1619
GO:0050852	T cell receptor signaling pathway	16	3	1.43	0.16518	0.16518	3dpi	BP	NonN_8	GO:0050852	Cacnb4, Cd81, Rps3	144	Kcnb2, Rbfox3, Cdh18, Hs3st4, Grik1, Trhde, Dpp6, Sgcd, Pcdh10, Ntrk3, Slc8a3, Pcdh11x, Upp2, Meg3, Samd4, Cntnap2, Tmem132b, Mctp1, Jakmip2, Dner, Cacnb4, Kif26b, D430041D05Rik, Naaladl2, Sgcz, Brinp1, Xkr6, Atp8a2, Stxbp1, Dnajc6, Brinp3, Rps2, Diaph2, Igsf8, Rpsa, Plcl1, Ubc, Ifitm3, Epas1, Cobll1, Rps4x, Actb, Rpl3, Cfl1, Cdc42, Spock2, ENSMUSG00000040904, Rps29, Rps24, B2m, Atp6v0c, Rap1a, R…	1619
GO:1904063	negative regulation of cation transmembr...	16	3	1.43	0.16518	0.16518	3dpi	BP	NonN_8	GO:1904063	Atp1a2, Calm1, Calm2	144	Kcnb2, Rbfox3, Cdh18, Hs3st4, Grik1, Trhde, Dpp6, Sgcd, Pcdh10, Ntrk3, Slc8a3, Pcdh11x, Upp2, Meg3, Samd4, Cntnap2, Tmem132b, Mctp1, Jakmip2, Dner, Cacnb4, Kif26b, D430041D05Rik, Naaladl2, Sgcz, Brinp1, Xkr6, Atp8a2, Stxbp1, Dnajc6, Brinp3, Rps2, Diaph2, Igsf8, Rpsa, Plcl1, Ubc, Ifitm3, Epas1, Cobll1, Rps4x, Actb, Rpl3, Cfl1, Cdc42, Spock2, ENSMUSG00000040904, Rps29, Rps24, B2m, Atp6v0c, Rap1a, R…	1619
GO:1904427	positive regulation of calcium ion trans...	16	3	1.43	0.16518	0.16518	3dpi	BP	NonN_8	GO:1904427	Cacnb4, Calm1, Calm2	144	Kcnb2, Rbfox3, Cdh18, Hs3st4, Grik1, Trhde, Dpp6, Sgcd, Pcdh10, Ntrk3, Slc8a3, Pcdh11x, Upp2, Meg3, Samd4, Cntnap2, Tmem132b, Mctp1, Jakmip2, Dner, Cacnb4, Kif26b, D430041D05Rik, Naaladl2, Sgcz, Brinp1, Xkr6, Atp8a2, Stxbp1, Dnajc6, Brinp3, Rps2, Diaph2, Igsf8, Rpsa, Plcl1, Ubc, Ifitm3, Epas1, Cobll1, Rps4x, Actb, Rpl3, Cfl1, Cdc42, Spock2, ENSMUSG00000040904, Rps29, Rps24, B2m, Atp6v0c, Rap1a, R…	1619
GO:0080134	regulation of response to stress	119	14	10.61	0.16541	0.16541	3dpi	BP	NonN_8	GO:0080134	B2m, Cd81, Cdc42, Chchd2, Gpx4, Gstp1, Mctp1, Ndfip1, Ndufc2, Ntrk3, Ppia, Prdx1, Ptn, Rps3	144	Kcnb2, Rbfox3, Cdh18, Hs3st4, Grik1, Trhde, Dpp6, Sgcd, Pcdh10, Ntrk3, Slc8a3, Pcdh11x, Upp2, Meg3, Samd4, Cntnap2, Tmem132b, Mctp1, Jakmip2, Dner, Cacnb4, Kif26b, D430041D05Rik, Naaladl2, Sgcz, Brinp1, Xkr6, Atp8a2, Stxbp1, Dnajc6, Brinp3, Rps2, Diaph2, Igsf8, Rpsa, Plcl1, Ubc, Ifitm3, Epas1, Cobll1, Rps4x, Actb, Rpl3, Cfl1, Cdc42, Spock2, ENSMUSG00000040904, Rps29, Rps24, B2m, Atp6v0c, Rap1a, R…	1619
GO:0051704	multi-organism process	80	10	7.13	0.16820	0.16820	3dpi	BP	NonN_8	GO:0051704	Aldoa, Bsg, Diaph2, Gpx4, H3f3b, Ptgds, Ptn, Septin7, Stxbp1, Ubb	144	Kcnb2, Rbfox3, Cdh18, Hs3st4, Grik1, Trhde, Dpp6, Sgcd, Pcdh10, Ntrk3, Slc8a3, Pcdh11x, Upp2, Meg3, Samd4, Cntnap2, Tmem132b, Mctp1, Jakmip2, Dner, Cacnb4, Kif26b, D430041D05Rik, Naaladl2, Sgcz, Brinp1, Xkr6, Atp8a2, Stxbp1, Dnajc6, Brinp3, Rps2, Diaph2, Igsf8, Rpsa, Plcl1, Ubc, Ifitm3, Epas1, Cobll1, Rps4x, Actb, Rpl3, Cfl1, Cdc42, Spock2, ENSMUSG00000040904, Rps29, Rps24, B2m, Atp6v0c, Rap1a, R…	1619
GO:0032409	regulation of transporter activity	61	8	5.44	0.16978	0.16978	3dpi	BP	NonN_8	GO:0032409	Actb, Atp1a2, Cacnb4, Calm1, Calm2, Cfl1, Ndfip1, Ndufa4	144	Kcnb2, Rbfox3, Cdh18, Hs3st4, Grik1, Trhde, Dpp6, Sgcd, Pcdh10, Ntrk3, Slc8a3, Pcdh11x, Upp2, Meg3, Samd4, Cntnap2, Tmem132b, Mctp1, Jakmip2, Dner, Cacnb4, Kif26b, D430041D05Rik, Naaladl2, Sgcz, Brinp1, Xkr6, Atp8a2, Stxbp1, Dnajc6, Brinp3, Rps2, Diaph2, Igsf8, Rpsa, Plcl1, Ubc, Ifitm3, Epas1, Cobll1, Rps4x, Actb, Rpl3, Cfl1, Cdc42, Spock2, ENSMUSG00000040904, Rps29, Rps24, B2m, Atp6v0c, Rap1a, R…	1619
GO:0055065	metal ion homeostasis	90	11	8.03	0.17072	0.55595	3dpi	BP	NonN_8	GO:0055065	Atp1a2, B2m, Cacnb4, Calm1, Calm2, Epas1, Ftl1, Mt1, Ndfip1, Sgcd, Slc8a3	144	Kcnb2, Rbfox3, Cdh18, Hs3st4, Grik1, Trhde, Dpp6, Sgcd, Pcdh10, Ntrk3, Slc8a3, Pcdh11x, Upp2, Meg3, Samd4, Cntnap2, Tmem132b, Mctp1, Jakmip2, Dner, Cacnb4, Kif26b, D430041D05Rik, Naaladl2, Sgcz, Brinp1, Xkr6, Atp8a2, Stxbp1, Dnajc6, Brinp3, Rps2, Diaph2, Igsf8, Rpsa, Plcl1, Ubc, Ifitm3, Epas1, Cobll1, Rps4x, Actb, Rpl3, Cfl1, Cdc42, Spock2, ENSMUSG00000040904, Rps29, Rps24, B2m, Atp6v0c, Rap1a, R…	1619
GO:0002429	immune response-activating cell surface ...	25	4	2.23	0.17747	0.17747	3dpi	BP	NonN_8	GO:0002429	Cacnb4, Cd81, Rap1a, Rps3	144	Kcnb2, Rbfox3, Cdh18, Hs3st4, Grik1, Trhde, Dpp6, Sgcd, Pcdh10, Ntrk3, Slc8a3, Pcdh11x, Upp2, Meg3, Samd4, Cntnap2, Tmem132b, Mctp1, Jakmip2, Dner, Cacnb4, Kif26b, D430041D05Rik, Naaladl2, Sgcz, Brinp1, Xkr6, Atp8a2, Stxbp1, Dnajc6, Brinp3, Rps2, Diaph2, Igsf8, Rpsa, Plcl1, Ubc, Ifitm3, Epas1, Cobll1, Rps4x, Actb, Rpl3, Cfl1, Cdc42, Spock2, ENSMUSG00000040904, Rps29, Rps24, B2m, Atp6v0c, Rap1a, R…	1619
GO:0002699	positive regulation of immune effector p...	25	4	2.23	0.17747	0.17747	3dpi	BP	NonN_8	GO:0002699	B2m, Cd81, Rap1a, Stxbp1	144	Kcnb2, Rbfox3, Cdh18, Hs3st4, Grik1, Trhde, Dpp6, Sgcd, Pcdh10, Ntrk3, Slc8a3, Pcdh11x, Upp2, Meg3, Samd4, Cntnap2, Tmem132b, Mctp1, Jakmip2, Dner, Cacnb4, Kif26b, D430041D05Rik, Naaladl2, Sgcz, Brinp1, Xkr6, Atp8a2, Stxbp1, Dnajc6, Brinp3, Rps2, Diaph2, Igsf8, Rpsa, Plcl1, Ubc, Ifitm3, Epas1, Cobll1, Rps4x, Actb, Rpl3, Cfl1, Cdc42, Spock2, ENSMUSG00000040904, Rps29, Rps24, B2m, Atp6v0c, Rap1a, R…	1619
GO:0002757	immune response-activating signal transd...	25	4	2.23	0.17747	0.17747	3dpi	BP	NonN_8	GO:0002757	Cacnb4, Cd81, Rap1a, Rps3	144	Kcnb2, Rbfox3, Cdh18, Hs3st4, Grik1, Trhde, Dpp6, Sgcd, Pcdh10, Ntrk3, Slc8a3, Pcdh11x, Upp2, Meg3, Samd4, Cntnap2, Tmem132b, Mctp1, Jakmip2, Dner, Cacnb4, Kif26b, D430041D05Rik, Naaladl2, Sgcz, Brinp1, Xkr6, Atp8a2, Stxbp1, Dnajc6, Brinp3, Rps2, Diaph2, Igsf8, Rpsa, Plcl1, Ubc, Ifitm3, Epas1, Cobll1, Rps4x, Actb, Rpl3, Cfl1, Cdc42, Spock2, ENSMUSG00000040904, Rps29, Rps24, B2m, Atp6v0c, Rap1a, R…	1619
GO:0002768	immune response-regulating cell surface ...	25	4	2.23	0.17747	0.17747	3dpi	BP	NonN_8	GO:0002768	Cacnb4, Cd81, Rap1a, Rps3	144	Kcnb2, Rbfox3, Cdh18, Hs3st4, Grik1, Trhde, Dpp6, Sgcd, Pcdh10, Ntrk3, Slc8a3, Pcdh11x, Upp2, Meg3, Samd4, Cntnap2, Tmem132b, Mctp1, Jakmip2, Dner, Cacnb4, Kif26b, D430041D05Rik, Naaladl2, Sgcz, Brinp1, Xkr6, Atp8a2, Stxbp1, Dnajc6, Brinp3, Rps2, Diaph2, Igsf8, Rpsa, Plcl1, Ubc, Ifitm3, Epas1, Cobll1, Rps4x, Actb, Rpl3, Cfl1, Cdc42, Spock2, ENSMUSG00000040904, Rps29, Rps24, B2m, Atp6v0c, Rap1a, R…	1619
GO:0006469	negative regulation of protein kinase ac...	25	4	2.23	0.17747	0.17747	3dpi	BP	NonN_8	GO:0006469	Actb, Gstp1, Ppia, Slc8a3	144	Kcnb2, Rbfox3, Cdh18, Hs3st4, Grik1, Trhde, Dpp6, Sgcd, Pcdh10, Ntrk3, Slc8a3, Pcdh11x, Upp2, Meg3, Samd4, Cntnap2, Tmem132b, Mctp1, Jakmip2, Dner, Cacnb4, Kif26b, D430041D05Rik, Naaladl2, Sgcz, Brinp1, Xkr6, Atp8a2, Stxbp1, Dnajc6, Brinp3, Rps2, Diaph2, Igsf8, Rpsa, Plcl1, Ubc, Ifitm3, Epas1, Cobll1, Rps4x, Actb, Rpl3, Cfl1, Cdc42, Spock2, ENSMUSG00000040904, Rps29, Rps24, B2m, Atp6v0c, Rap1a, R…	1619
GO:0070302	regulation of stress-activated protein k...	25	4	2.23	0.17747	0.17747	3dpi	BP	NonN_8	GO:0070302	Cdc42, Gstp1, Ppia, Prdx1	144	Kcnb2, Rbfox3, Cdh18, Hs3st4, Grik1, Trhde, Dpp6, Sgcd, Pcdh10, Ntrk3, Slc8a3, Pcdh11x, Upp2, Meg3, Samd4, Cntnap2, Tmem132b, Mctp1, Jakmip2, Dner, Cacnb4, Kif26b, D430041D05Rik, Naaladl2, Sgcz, Brinp1, Xkr6, Atp8a2, Stxbp1, Dnajc6, Brinp3, Rps2, Diaph2, Igsf8, Rpsa, Plcl1, Ubc, Ifitm3, Epas1, Cobll1, Rps4x, Actb, Rpl3, Cfl1, Cdc42, Spock2, ENSMUSG00000040904, Rps29, Rps24, B2m, Atp6v0c, Rap1a, R…	1619
GO:0002697	regulation of immune effector process	34	5	3.03	0.18002	0.18002	3dpi	BP	NonN_8	GO:0002697	B2m, Cd81, Ndfip1, Rap1a, Stxbp1	144	Kcnb2, Rbfox3, Cdh18, Hs3st4, Grik1, Trhde, Dpp6, Sgcd, Pcdh10, Ntrk3, Slc8a3, Pcdh11x, Upp2, Meg3, Samd4, Cntnap2, Tmem132b, Mctp1, Jakmip2, Dner, Cacnb4, Kif26b, D430041D05Rik, Naaladl2, Sgcz, Brinp1, Xkr6, Atp8a2, Stxbp1, Dnajc6, Brinp3, Rps2, Diaph2, Igsf8, Rpsa, Plcl1, Ubc, Ifitm3, Epas1, Cobll1, Rps4x, Actb, Rpl3, Cfl1, Cdc42, Spock2, ENSMUSG00000040904, Rps29, Rps24, B2m, Atp6v0c, Rap1a, R…	1619
GO:0097193	intrinsic apoptotic signaling pathway	34	5	3.03	0.18002	0.18002	3dpi	BP	NonN_8	GO:0097193	Hint1, Ppia, Rpl11, Rps3, Ubb	144	Kcnb2, Rbfox3, Cdh18, Hs3st4, Grik1, Trhde, Dpp6, Sgcd, Pcdh10, Ntrk3, Slc8a3, Pcdh11x, Upp2, Meg3, Samd4, Cntnap2, Tmem132b, Mctp1, Jakmip2, Dner, Cacnb4, Kif26b, D430041D05Rik, Naaladl2, Sgcz, Brinp1, Xkr6, Atp8a2, Stxbp1, Dnajc6, Brinp3, Rps2, Diaph2, Igsf8, Rpsa, Plcl1, Ubc, Ifitm3, Epas1, Cobll1, Rps4x, Actb, Rpl3, Cfl1, Cdc42, Spock2, ENSMUSG00000040904, Rps29, Rps24, B2m, Atp6v0c, Rap1a, R…	1619
GO:0007049	cell cycle	152	17	13.55	0.18614	0.18614	3dpi	BP	NonN_8	GO:0007049	Actb, Brinp1, Brinp3, Cacnb4, Calm1, Calm2, Cdc42, Cfl1, Hsp90ab1, Rpl17, Rpl23, Rpl24, Rps15a, Rps3, Septin7, Tuba1a, Ubb	144	Kcnb2, Rbfox3, Cdh18, Hs3st4, Grik1, Trhde, Dpp6, Sgcd, Pcdh10, Ntrk3, Slc8a3, Pcdh11x, Upp2, Meg3, Samd4, Cntnap2, Tmem132b, Mctp1, Jakmip2, Dner, Cacnb4, Kif26b, D430041D05Rik, Naaladl2, Sgcz, Brinp1, Xkr6, Atp8a2, Stxbp1, Dnajc6, Brinp3, Rps2, Diaph2, Igsf8, Rpsa, Plcl1, Ubc, Ifitm3, Epas1, Cobll1, Rps4x, Actb, Rpl3, Cfl1, Cdc42, Spock2, ENSMUSG00000040904, Rps29, Rps24, B2m, Atp6v0c, Rap1a, R…	1619
GO:0003006	developmental process involved in reprod...	82	10	7.31	0.18797	0.18797	3dpi	BP	NonN_8	GO:0003006	Bsg, Diaph2, Epas1, Gpx4, H3f3b, Hsp90ab1, Ptn, Septin7, Stxbp1, Ubb	144	Kcnb2, Rbfox3, Cdh18, Hs3st4, Grik1, Trhde, Dpp6, Sgcd, Pcdh10, Ntrk3, Slc8a3, Pcdh11x, Upp2, Meg3, Samd4, Cntnap2, Tmem132b, Mctp1, Jakmip2, Dner, Cacnb4, Kif26b, D430041D05Rik, Naaladl2, Sgcz, Brinp1, Xkr6, Atp8a2, Stxbp1, Dnajc6, Brinp3, Rps2, Diaph2, Igsf8, Rpsa, Plcl1, Ubc, Ifitm3, Epas1, Cobll1, Rps4x, Actb, Rpl3, Cfl1, Cdc42, Spock2, ENSMUSG00000040904, Rps29, Rps24, B2m, Atp6v0c, Rap1a, R…	1619
GO:0000281	mitotic cytokinesis	9	2	0.8	0.18806	0.18806	3dpi	BP	NonN_8	GO:0000281	Cfl1, Septin7	144	Kcnb2, Rbfox3, Cdh18, Hs3st4, Grik1, Trhde, Dpp6, Sgcd, Pcdh10, Ntrk3, Slc8a3, Pcdh11x, Upp2, Meg3, Samd4, Cntnap2, Tmem132b, Mctp1, Jakmip2, Dner, Cacnb4, Kif26b, D430041D05Rik, Naaladl2, Sgcz, Brinp1, Xkr6, Atp8a2, Stxbp1, Dnajc6, Brinp3, Rps2, Diaph2, Igsf8, Rpsa, Plcl1, Ubc, Ifitm3, Epas1, Cobll1, Rps4x, Actb, Rpl3, Cfl1, Cdc42, Spock2, ENSMUSG00000040904, Rps29, Rps24, B2m, Atp6v0c, Rap1a, R…	1619
GO:0002367	cytokine production involved in immune r...	9	2	0.8	0.18806	0.18806	3dpi	BP	NonN_8	GO:0002367	B2m, Cd81	144	Kcnb2, Rbfox3, Cdh18, Hs3st4, Grik1, Trhde, Dpp6, Sgcd, Pcdh10, Ntrk3, Slc8a3, Pcdh11x, Upp2, Meg3, Samd4, Cntnap2, Tmem132b, Mctp1, Jakmip2, Dner, Cacnb4, Kif26b, D430041D05Rik, Naaladl2, Sgcz, Brinp1, Xkr6, Atp8a2, Stxbp1, Dnajc6, Brinp3, Rps2, Diaph2, Igsf8, Rpsa, Plcl1, Ubc, Ifitm3, Epas1, Cobll1, Rps4x, Actb, Rpl3, Cfl1, Cdc42, Spock2, ENSMUSG00000040904, Rps29, Rps24, B2m, Atp6v0c, Rap1a, R…	1619
GO:0002709	regulation of T cell mediated immunity	9	2	0.8	0.18806	0.18806	3dpi	BP	NonN_8	GO:0002709	B2m, Cd81	144	Kcnb2, Rbfox3, Cdh18, Hs3st4, Grik1, Trhde, Dpp6, Sgcd, Pcdh10, Ntrk3, Slc8a3, Pcdh11x, Upp2, Meg3, Samd4, Cntnap2, Tmem132b, Mctp1, Jakmip2, Dner, Cacnb4, Kif26b, D430041D05Rik, Naaladl2, Sgcz, Brinp1, Xkr6, Atp8a2, Stxbp1, Dnajc6, Brinp3, Rps2, Diaph2, Igsf8, Rpsa, Plcl1, Ubc, Ifitm3, Epas1, Cobll1, Rps4x, Actb, Rpl3, Cfl1, Cdc42, Spock2, ENSMUSG00000040904, Rps29, Rps24, B2m, Atp6v0c, Rap1a, R…	1619
GO:0002718	regulation of cytokine production involv...	9	2	0.8	0.18806	0.18806	3dpi	BP	NonN_8	GO:0002718	B2m, Cd81	144	Kcnb2, Rbfox3, Cdh18, Hs3st4, Grik1, Trhde, Dpp6, Sgcd, Pcdh10, Ntrk3, Slc8a3, Pcdh11x, Upp2, Meg3, Samd4, Cntnap2, Tmem132b, Mctp1, Jakmip2, Dner, Cacnb4, Kif26b, D430041D05Rik, Naaladl2, Sgcz, Brinp1, Xkr6, Atp8a2, Stxbp1, Dnajc6, Brinp3, Rps2, Diaph2, Igsf8, Rpsa, Plcl1, Ubc, Ifitm3, Epas1, Cobll1, Rps4x, Actb, Rpl3, Cfl1, Cdc42, Spock2, ENSMUSG00000040904, Rps29, Rps24, B2m, Atp6v0c, Rap1a, R…	1619
GO:0006413	translational initiation	9	2	0.8	0.18806	0.18806	3dpi	BP	NonN_8	GO:0006413	Eif1, Rps2	144	Kcnb2, Rbfox3, Cdh18, Hs3st4, Grik1, Trhde, Dpp6, Sgcd, Pcdh10, Ntrk3, Slc8a3, Pcdh11x, Upp2, Meg3, Samd4, Cntnap2, Tmem132b, Mctp1, Jakmip2, Dner, Cacnb4, Kif26b, D430041D05Rik, Naaladl2, Sgcz, Brinp1, Xkr6, Atp8a2, Stxbp1, Dnajc6, Brinp3, Rps2, Diaph2, Igsf8, Rpsa, Plcl1, Ubc, Ifitm3, Epas1, Cobll1, Rps4x, Actb, Rpl3, Cfl1, Cdc42, Spock2, ENSMUSG00000040904, Rps29, Rps24, B2m, Atp6v0c, Rap1a, R…	1619
GO:0007565	female pregnancy	9	2	0.8	0.18806	0.18806	3dpi	BP	NonN_8	GO:0007565	H3f3b, Ptn	144	Kcnb2, Rbfox3, Cdh18, Hs3st4, Grik1, Trhde, Dpp6, Sgcd, Pcdh10, Ntrk3, Slc8a3, Pcdh11x, Upp2, Meg3, Samd4, Cntnap2, Tmem132b, Mctp1, Jakmip2, Dner, Cacnb4, Kif26b, D430041D05Rik, Naaladl2, Sgcz, Brinp1, Xkr6, Atp8a2, Stxbp1, Dnajc6, Brinp3, Rps2, Diaph2, Igsf8, Rpsa, Plcl1, Ubc, Ifitm3, Epas1, Cobll1, Rps4x, Actb, Rpl3, Cfl1, Cdc42, Spock2, ENSMUSG00000040904, Rps29, Rps24, B2m, Atp6v0c, Rap1a, R…	1619
GO:0010880	regulation of release of sequestered cal...	9	2	0.8	0.18806	0.18806	3dpi	BP	NonN_8	GO:0010880	Calm1, Calm2	144	Kcnb2, Rbfox3, Cdh18, Hs3st4, Grik1, Trhde, Dpp6, Sgcd, Pcdh10, Ntrk3, Slc8a3, Pcdh11x, Upp2, Meg3, Samd4, Cntnap2, Tmem132b, Mctp1, Jakmip2, Dner, Cacnb4, Kif26b, D430041D05Rik, Naaladl2, Sgcz, Brinp1, Xkr6, Atp8a2, Stxbp1, Dnajc6, Brinp3, Rps2, Diaph2, Igsf8, Rpsa, Plcl1, Ubc, Ifitm3, Epas1, Cobll1, Rps4x, Actb, Rpl3, Cfl1, Cdc42, Spock2, ENSMUSG00000040904, Rps29, Rps24, B2m, Atp6v0c, Rap1a, R…	1619
GO:0014032	neural crest cell development	9	2	0.8	0.18806	0.18806	3dpi	BP	NonN_8	GO:0014032	Cdc42, Cfl1	144	Kcnb2, Rbfox3, Cdh18, Hs3st4, Grik1, Trhde, Dpp6, Sgcd, Pcdh10, Ntrk3, Slc8a3, Pcdh11x, Upp2, Meg3, Samd4, Cntnap2, Tmem132b, Mctp1, Jakmip2, Dner, Cacnb4, Kif26b, D430041D05Rik, Naaladl2, Sgcz, Brinp1, Xkr6, Atp8a2, Stxbp1, Dnajc6, Brinp3, Rps2, Diaph2, Igsf8, Rpsa, Plcl1, Ubc, Ifitm3, Epas1, Cobll1, Rps4x, Actb, Rpl3, Cfl1, Cdc42, Spock2, ENSMUSG00000040904, Rps29, Rps24, B2m, Atp6v0c, Rap1a, R…	1619
GO:0014808	release of sequestered calcium ion into ...	9	2	0.8	0.18806	0.18806	3dpi	BP	NonN_8	GO:0014808	Calm1, Calm2	144	Kcnb2, Rbfox3, Cdh18, Hs3st4, Grik1, Trhde, Dpp6, Sgcd, Pcdh10, Ntrk3, Slc8a3, Pcdh11x, Upp2, Meg3, Samd4, Cntnap2, Tmem132b, Mctp1, Jakmip2, Dner, Cacnb4, Kif26b, D430041D05Rik, Naaladl2, Sgcz, Brinp1, Xkr6, Atp8a2, Stxbp1, Dnajc6, Brinp3, Rps2, Diaph2, Igsf8, Rpsa, Plcl1, Ubc, Ifitm3, Epas1, Cobll1, Rps4x, Actb, Rpl3, Cfl1, Cdc42, Spock2, ENSMUSG00000040904, Rps29, Rps24, B2m, Atp6v0c, Rap1a, R…	1619
GO:0021536	diencephalon development	9	2	0.8	0.18806	0.18806	3dpi	BP	NonN_8	GO:0021536	Ubb, Uqcrq	144	Kcnb2, Rbfox3, Cdh18, Hs3st4, Grik1, Trhde, Dpp6, Sgcd, Pcdh10, Ntrk3, Slc8a3, Pcdh11x, Upp2, Meg3, Samd4, Cntnap2, Tmem132b, Mctp1, Jakmip2, Dner, Cacnb4, Kif26b, D430041D05Rik, Naaladl2, Sgcz, Brinp1, Xkr6, Atp8a2, Stxbp1, Dnajc6, Brinp3, Rps2, Diaph2, Igsf8, Rpsa, Plcl1, Ubc, Ifitm3, Epas1, Cobll1, Rps4x, Actb, Rpl3, Cfl1, Cdc42, Spock2, ENSMUSG00000040904, Rps29, Rps24, B2m, Atp6v0c, Rap1a, R…	1619
GO:0032418	lysosome localization	9	2	0.8	0.18806	0.18806	3dpi	BP	NonN_8	GO:0032418	Ptgds, Stxbp1	144	Kcnb2, Rbfox3, Cdh18, Hs3st4, Grik1, Trhde, Dpp6, Sgcd, Pcdh10, Ntrk3, Slc8a3, Pcdh11x, Upp2, Meg3, Samd4, Cntnap2, Tmem132b, Mctp1, Jakmip2, Dner, Cacnb4, Kif26b, D430041D05Rik, Naaladl2, Sgcz, Brinp1, Xkr6, Atp8a2, Stxbp1, Dnajc6, Brinp3, Rps2, Diaph2, Igsf8, Rpsa, Plcl1, Ubc, Ifitm3, Epas1, Cobll1, Rps4x, Actb, Rpl3, Cfl1, Cdc42, Spock2, ENSMUSG00000040904, Rps29, Rps24, B2m, Atp6v0c, Rap1a, R…	1619
GO:0043550	regulation of lipid kinase activity	9	2	0.8	0.18806	0.18806	3dpi	BP	NonN_8	GO:0043550	Cd81, Cdc42	144	Kcnb2, Rbfox3, Cdh18, Hs3st4, Grik1, Trhde, Dpp6, Sgcd, Pcdh10, Ntrk3, Slc8a3, Pcdh11x, Upp2, Meg3, Samd4, Cntnap2, Tmem132b, Mctp1, Jakmip2, Dner, Cacnb4, Kif26b, D430041D05Rik, Naaladl2, Sgcz, Brinp1, Xkr6, Atp8a2, Stxbp1, Dnajc6, Brinp3, Rps2, Diaph2, Igsf8, Rpsa, Plcl1, Ubc, Ifitm3, Epas1, Cobll1, Rps4x, Actb, Rpl3, Cfl1, Cdc42, Spock2, ENSMUSG00000040904, Rps29, Rps24, B2m, Atp6v0c, Rap1a, R…	1619
GO:0044409	entry into host	9	2	0.8	0.18806	0.18806	3dpi	BP	NonN_8	GO:0044409	Bsg, Ifitm3	144	Kcnb2, Rbfox3, Cdh18, Hs3st4, Grik1, Trhde, Dpp6, Sgcd, Pcdh10, Ntrk3, Slc8a3, Pcdh11x, Upp2, Meg3, Samd4, Cntnap2, Tmem132b, Mctp1, Jakmip2, Dner, Cacnb4, Kif26b, D430041D05Rik, Naaladl2, Sgcz, Brinp1, Xkr6, Atp8a2, Stxbp1, Dnajc6, Brinp3, Rps2, Diaph2, Igsf8, Rpsa, Plcl1, Ubc, Ifitm3, Epas1, Cobll1, Rps4x, Actb, Rpl3, Cfl1, Cdc42, Spock2, ENSMUSG00000040904, Rps29, Rps24, B2m, Atp6v0c, Rap1a, R…	1619
GO:0046718	viral entry into host cell	9	2	0.8	0.18806	0.18806	3dpi	BP	NonN_8	GO:0046718	Bsg, Ifitm3	144	Kcnb2, Rbfox3, Cdh18, Hs3st4, Grik1, Trhde, Dpp6, Sgcd, Pcdh10, Ntrk3, Slc8a3, Pcdh11x, Upp2, Meg3, Samd4, Cntnap2, Tmem132b, Mctp1, Jakmip2, Dner, Cacnb4, Kif26b, D430041D05Rik, Naaladl2, Sgcz, Brinp1, Xkr6, Atp8a2, Stxbp1, Dnajc6, Brinp3, Rps2, Diaph2, Igsf8, Rpsa, Plcl1, Ubc, Ifitm3, Epas1, Cobll1, Rps4x, Actb, Rpl3, Cfl1, Cdc42, Spock2, ENSMUSG00000040904, Rps29, Rps24, B2m, Atp6v0c, Rap1a, R…	1619
GO:0050728	negative regulation of inflammatory resp...	9	2	0.8	0.18806	0.18806	3dpi	BP	NonN_8	GO:0050728	Gstp1, Ndfip1	144	Kcnb2, Rbfox3, Cdh18, Hs3st4, Grik1, Trhde, Dpp6, Sgcd, Pcdh10, Ntrk3, Slc8a3, Pcdh11x, Upp2, Meg3, Samd4, Cntnap2, Tmem132b, Mctp1, Jakmip2, Dner, Cacnb4, Kif26b, D430041D05Rik, Naaladl2, Sgcz, Brinp1, Xkr6, Atp8a2, Stxbp1, Dnajc6, Brinp3, Rps2, Diaph2, Igsf8, Rpsa, Plcl1, Ubc, Ifitm3, Epas1, Cobll1, Rps4x, Actb, Rpl3, Cfl1, Cdc42, Spock2, ENSMUSG00000040904, Rps29, Rps24, B2m, Atp6v0c, Rap1a, R…	1619
GO:0050854	regulation of antigen receptor-mediated ...	9	2	0.8	0.18806	0.18806	3dpi	BP	NonN_8	GO:0050854	Cd81, Rps3	144	Kcnb2, Rbfox3, Cdh18, Hs3st4, Grik1, Trhde, Dpp6, Sgcd, Pcdh10, Ntrk3, Slc8a3, Pcdh11x, Upp2, Meg3, Samd4, Cntnap2, Tmem132b, Mctp1, Jakmip2, Dner, Cacnb4, Kif26b, D430041D05Rik, Naaladl2, Sgcz, Brinp1, Xkr6, Atp8a2, Stxbp1, Dnajc6, Brinp3, Rps2, Diaph2, Igsf8, Rpsa, Plcl1, Ubc, Ifitm3, Epas1, Cobll1, Rps4x, Actb, Rpl3, Cfl1, Cdc42, Spock2, ENSMUSG00000040904, Rps29, Rps24, B2m, Atp6v0c, Rap1a, R…	1619
GO:0097035	regulation of membrane lipid distributio...	9	2	0.8	0.18806	0.18806	3dpi	BP	NonN_8	GO:0097035	Atp8a2, Xkr6	144	Kcnb2, Rbfox3, Cdh18, Hs3st4, Grik1, Trhde, Dpp6, Sgcd, Pcdh10, Ntrk3, Slc8a3, Pcdh11x, Upp2, Meg3, Samd4, Cntnap2, Tmem132b, Mctp1, Jakmip2, Dner, Cacnb4, Kif26b, D430041D05Rik, Naaladl2, Sgcz, Brinp1, Xkr6, Atp8a2, Stxbp1, Dnajc6, Brinp3, Rps2, Diaph2, Igsf8, Rpsa, Plcl1, Ubc, Ifitm3, Epas1, Cobll1, Rps4x, Actb, Rpl3, Cfl1, Cdc42, Spock2, ENSMUSG00000040904, Rps29, Rps24, B2m, Atp6v0c, Rap1a, R…	1619
GO:1901136	carbohydrate derivative catabolic proces...	9	2	0.8	0.18806	0.18806	3dpi	BP	NonN_8	GO:1901136	Hint1, Upp2	144	Kcnb2, Rbfox3, Cdh18, Hs3st4, Grik1, Trhde, Dpp6, Sgcd, Pcdh10, Ntrk3, Slc8a3, Pcdh11x, Upp2, Meg3, Samd4, Cntnap2, Tmem132b, Mctp1, Jakmip2, Dner, Cacnb4, Kif26b, D430041D05Rik, Naaladl2, Sgcz, Brinp1, Xkr6, Atp8a2, Stxbp1, Dnajc6, Brinp3, Rps2, Diaph2, Igsf8, Rpsa, Plcl1, Ubc, Ifitm3, Epas1, Cobll1, Rps4x, Actb, Rpl3, Cfl1, Cdc42, Spock2, ENSMUSG00000040904, Rps29, Rps24, B2m, Atp6v0c, Rap1a, R…	1619
GO:1902017	regulation of cilium assembly	9	2	0.8	0.18806	0.18806	3dpi	BP	NonN_8	GO:1902017	Dynll1, Septin7	144	Kcnb2, Rbfox3, Cdh18, Hs3st4, Grik1, Trhde, Dpp6, Sgcd, Pcdh10, Ntrk3, Slc8a3, Pcdh11x, Upp2, Meg3, Samd4, Cntnap2, Tmem132b, Mctp1, Jakmip2, Dner, Cacnb4, Kif26b, D430041D05Rik, Naaladl2, Sgcz, Brinp1, Xkr6, Atp8a2, Stxbp1, Dnajc6, Brinp3, Rps2, Diaph2, Igsf8, Rpsa, Plcl1, Ubc, Ifitm3, Epas1, Cobll1, Rps4x, Actb, Rpl3, Cfl1, Cdc42, Spock2, ENSMUSG00000040904, Rps29, Rps24, B2m, Atp6v0c, Rap1a, R…	1619
GO:1902117	positive regulation of organelle assembl...	9	2	0.8	0.18806	0.18806	3dpi	BP	NonN_8	GO:1902117	Dynll1, Septin7	144	Kcnb2, Rbfox3, Cdh18, Hs3st4, Grik1, Trhde, Dpp6, Sgcd, Pcdh10, Ntrk3, Slc8a3, Pcdh11x, Upp2, Meg3, Samd4, Cntnap2, Tmem132b, Mctp1, Jakmip2, Dner, Cacnb4, Kif26b, D430041D05Rik, Naaladl2, Sgcz, Brinp1, Xkr6, Atp8a2, Stxbp1, Dnajc6, Brinp3, Rps2, Diaph2, Igsf8, Rpsa, Plcl1, Ubc, Ifitm3, Epas1, Cobll1, Rps4x, Actb, Rpl3, Cfl1, Cdc42, Spock2, ENSMUSG00000040904, Rps29, Rps24, B2m, Atp6v0c, Rap1a, R…	1619
GO:1903038	negative regulation of leukocyte cell-ce...	9	2	0.8	0.18806	0.18806	3dpi	BP	NonN_8	GO:1903038	Gstp1, Ndfip1	144	Kcnb2, Rbfox3, Cdh18, Hs3st4, Grik1, Trhde, Dpp6, Sgcd, Pcdh10, Ntrk3, Slc8a3, Pcdh11x, Upp2, Meg3, Samd4, Cntnap2, Tmem132b, Mctp1, Jakmip2, Dner, Cacnb4, Kif26b, D430041D05Rik, Naaladl2, Sgcz, Brinp1, Xkr6, Atp8a2, Stxbp1, Dnajc6, Brinp3, Rps2, Diaph2, Igsf8, Rpsa, Plcl1, Ubc, Ifitm3, Epas1, Cobll1, Rps4x, Actb, Rpl3, Cfl1, Cdc42, Spock2, ENSMUSG00000040904, Rps29, Rps24, B2m, Atp6v0c, Rap1a, R…	1619
GO:1903514	release of sequestered calcium ion into ...	9	2	0.8	0.18806	0.18806	3dpi	BP	NonN_8	GO:1903514	Calm1, Calm2	144	Kcnb2, Rbfox3, Cdh18, Hs3st4, Grik1, Trhde, Dpp6, Sgcd, Pcdh10, Ntrk3, Slc8a3, Pcdh11x, Upp2, Meg3, Samd4, Cntnap2, Tmem132b, Mctp1, Jakmip2, Dner, Cacnb4, Kif26b, D430041D05Rik, Naaladl2, Sgcz, Brinp1, Xkr6, Atp8a2, Stxbp1, Dnajc6, Brinp3, Rps2, Diaph2, Igsf8, Rpsa, Plcl1, Ubc, Ifitm3, Epas1, Cobll1, Rps4x, Actb, Rpl3, Cfl1, Cdc42, Spock2, ENSMUSG00000040904, Rps29, Rps24, B2m, Atp6v0c, Rap1a, R…	1619
GO:1904861	excitatory synapse assembly	9	2	0.8	0.18806	0.18806	3dpi	BP	NonN_8	GO:1904861	Cntnap2, Ntrk3	144	Kcnb2, Rbfox3, Cdh18, Hs3st4, Grik1, Trhde, Dpp6, Sgcd, Pcdh10, Ntrk3, Slc8a3, Pcdh11x, Upp2, Meg3, Samd4, Cntnap2, Tmem132b, Mctp1, Jakmip2, Dner, Cacnb4, Kif26b, D430041D05Rik, Naaladl2, Sgcz, Brinp1, Xkr6, Atp8a2, Stxbp1, Dnajc6, Brinp3, Rps2, Diaph2, Igsf8, Rpsa, Plcl1, Ubc, Ifitm3, Epas1, Cobll1, Rps4x, Actb, Rpl3, Cfl1, Cdc42, Spock2, ENSMUSG00000040904, Rps29, Rps24, B2m, Atp6v0c, Rap1a, R…	1619
GO:1905954	positive regulation of lipid localizatio...	9	2	0.8	0.18806	0.18806	3dpi	BP	NonN_8	GO:1905954	Atp8a2, Pltp	144	Kcnb2, Rbfox3, Cdh18, Hs3st4, Grik1, Trhde, Dpp6, Sgcd, Pcdh10, Ntrk3, Slc8a3, Pcdh11x, Upp2, Meg3, Samd4, Cntnap2, Tmem132b, Mctp1, Jakmip2, Dner, Cacnb4, Kif26b, D430041D05Rik, Naaladl2, Sgcz, Brinp1, Xkr6, Atp8a2, Stxbp1, Dnajc6, Brinp3, Rps2, Diaph2, Igsf8, Rpsa, Plcl1, Ubc, Ifitm3, Epas1, Cobll1, Rps4x, Actb, Rpl3, Cfl1, Cdc42, Spock2, ENSMUSG00000040904, Rps29, Rps24, B2m, Atp6v0c, Rap1a, R…	1619
GO:0034614	cellular response to reactive oxygen spe...	17	3	1.52	0.18822	0.18822	3dpi	BP	NonN_8	GO:0034614	Cfl1, Prdx1, Rps3	144	Kcnb2, Rbfox3, Cdh18, Hs3st4, Grik1, Trhde, Dpp6, Sgcd, Pcdh10, Ntrk3, Slc8a3, Pcdh11x, Upp2, Meg3, Samd4, Cntnap2, Tmem132b, Mctp1, Jakmip2, Dner, Cacnb4, Kif26b, D430041D05Rik, Naaladl2, Sgcz, Brinp1, Xkr6, Atp8a2, Stxbp1, Dnajc6, Brinp3, Rps2, Diaph2, Igsf8, Rpsa, Plcl1, Ubc, Ifitm3, Epas1, Cobll1, Rps4x, Actb, Rpl3, Cfl1, Cdc42, Spock2, ENSMUSG00000040904, Rps29, Rps24, B2m, Atp6v0c, Rap1a, R…	1619
GO:0034766	negative regulation of ion transmembrane...	17	3	1.52	0.18822	0.18822	3dpi	BP	NonN_8	GO:0034766	Atp1a2, Calm1, Calm2	144	Kcnb2, Rbfox3, Cdh18, Hs3st4, Grik1, Trhde, Dpp6, Sgcd, Pcdh10, Ntrk3, Slc8a3, Pcdh11x, Upp2, Meg3, Samd4, Cntnap2, Tmem132b, Mctp1, Jakmip2, Dner, Cacnb4, Kif26b, D430041D05Rik, Naaladl2, Sgcz, Brinp1, Xkr6, Atp8a2, Stxbp1, Dnajc6, Brinp3, Rps2, Diaph2, Igsf8, Rpsa, Plcl1, Ubc, Ifitm3, Epas1, Cobll1, Rps4x, Actb, Rpl3, Cfl1, Cdc42, Spock2, ENSMUSG00000040904, Rps29, Rps24, B2m, Atp6v0c, Rap1a, R…	1619
GO:0071824	protein-DNA complex subunit organization	17	3	1.52	0.18822	0.18822	3dpi	BP	NonN_8	GO:0071824	H3f3b, Ptma, Rpl23	144	Kcnb2, Rbfox3, Cdh18, Hs3st4, Grik1, Trhde, Dpp6, Sgcd, Pcdh10, Ntrk3, Slc8a3, Pcdh11x, Upp2, Meg3, Samd4, Cntnap2, Tmem132b, Mctp1, Jakmip2, Dner, Cacnb4, Kif26b, D430041D05Rik, Naaladl2, Sgcz, Brinp1, Xkr6, Atp8a2, Stxbp1, Dnajc6, Brinp3, Rps2, Diaph2, Igsf8, Rpsa, Plcl1, Ubc, Ifitm3, Epas1, Cobll1, Rps4x, Actb, Rpl3, Cfl1, Cdc42, Spock2, ENSMUSG00000040904, Rps29, Rps24, B2m, Atp6v0c, Rap1a, R…	1619
GO:1903322	positive regulation of protein modificat...	17	3	1.52	0.18822	0.18822	3dpi	BP	NonN_8	GO:1903322	Ndfip1, Rps2, Ubb	144	Kcnb2, Rbfox3, Cdh18, Hs3st4, Grik1, Trhde, Dpp6, Sgcd, Pcdh10, Ntrk3, Slc8a3, Pcdh11x, Upp2, Meg3, Samd4, Cntnap2, Tmem132b, Mctp1, Jakmip2, Dner, Cacnb4, Kif26b, D430041D05Rik, Naaladl2, Sgcz, Brinp1, Xkr6, Atp8a2, Stxbp1, Dnajc6, Brinp3, Rps2, Diaph2, Igsf8, Rpsa, Plcl1, Ubc, Ifitm3, Epas1, Cobll1, Rps4x, Actb, Rpl3, Cfl1, Cdc42, Spock2, ENSMUSG00000040904, Rps29, Rps24, B2m, Atp6v0c, Rap1a, R…	1619
GO:2001235	positive regulation of apoptotic signali...	17	3	1.52	0.18822	0.18822	3dpi	BP	NonN_8	GO:2001235	Rpl11, Rps3, Ubb	144	Kcnb2, Rbfox3, Cdh18, Hs3st4, Grik1, Trhde, Dpp6, Sgcd, Pcdh10, Ntrk3, Slc8a3, Pcdh11x, Upp2, Meg3, Samd4, Cntnap2, Tmem132b, Mctp1, Jakmip2, Dner, Cacnb4, Kif26b, D430041D05Rik, Naaladl2, Sgcz, Brinp1, Xkr6, Atp8a2, Stxbp1, Dnajc6, Brinp3, Rps2, Diaph2, Igsf8, Rpsa, Plcl1, Ubc, Ifitm3, Epas1, Cobll1, Rps4x, Actb, Rpl3, Cfl1, Cdc42, Spock2, ENSMUSG00000040904, Rps29, Rps24, B2m, Atp6v0c, Rap1a, R…	1619
GO:0065008	regulation of biological quality	471	47	42	0.18962	0.31794	3dpi	BP	NonN_8	GO:0065008	Aldoa, Atp1a2, Atp5j, Atp6v0c, Atp8a2, B2m, Bsg, Cacnb4, Calm1, Calm2, Cd81, Cdc42, Cfl1, Ckb, Cntnap2, Dpp6, Epas1, Ftl1, Grik1, Hsp90ab1, Mctp1, Mt1, Ndfip1, Ndufc2, Ntrk3, Pde8b, Plcl1, Ppia, Prdx1, Ptn, Rap1a, Rpl11, Rpl23, Rps14, Rps24, Rps5, Samd4, Serf2, Sgcd, Slc8a3, Sparc, Stxbp1, Tmsb10, Trhde, Tuba1a, Ubb, Xkr6	144	Kcnb2, Rbfox3, Cdh18, Hs3st4, Grik1, Trhde, Dpp6, Sgcd, Pcdh10, Ntrk3, Slc8a3, Pcdh11x, Upp2, Meg3, Samd4, Cntnap2, Tmem132b, Mctp1, Jakmip2, Dner, Cacnb4, Kif26b, D430041D05Rik, Naaladl2, Sgcz, Brinp1, Xkr6, Atp8a2, Stxbp1, Dnajc6, Brinp3, Rps2, Diaph2, Igsf8, Rpsa, Plcl1, Ubc, Ifitm3, Epas1, Cobll1, Rps4x, Actb, Rpl3, Cfl1, Cdc42, Spock2, ENSMUSG00000040904, Rps29, Rps24, B2m, Atp6v0c, Rap1a, R…	1619
GO:0031647	regulation of protein stability	44	6	3.92	0.19232	0.19232	3dpi	BP	NonN_8	GO:0031647	Cd81, Hsp90ab1, Rpl11, Rpl23, Serf2, Stxbp1	144	Kcnb2, Rbfox3, Cdh18, Hs3st4, Grik1, Trhde, Dpp6, Sgcd, Pcdh10, Ntrk3, Slc8a3, Pcdh11x, Upp2, Meg3, Samd4, Cntnap2, Tmem132b, Mctp1, Jakmip2, Dner, Cacnb4, Kif26b, D430041D05Rik, Naaladl2, Sgcz, Brinp1, Xkr6, Atp8a2, Stxbp1, Dnajc6, Brinp3, Rps2, Diaph2, Igsf8, Rpsa, Plcl1, Ubc, Ifitm3, Epas1, Cobll1, Rps4x, Actb, Rpl3, Cfl1, Cdc42, Spock2, ENSMUSG00000040904, Rps29, Rps24, B2m, Atp6v0c, Rap1a, R…	1619
GO:0043010	camera-type eye development	44	6	3.92	0.19232	0.19232	3dpi	BP	NonN_8	GO:0043010	Atp8a2, Bsg, Ntrk3, Pfdn5, Ptn, Rpl24	144	Kcnb2, Rbfox3, Cdh18, Hs3st4, Grik1, Trhde, Dpp6, Sgcd, Pcdh10, Ntrk3, Slc8a3, Pcdh11x, Upp2, Meg3, Samd4, Cntnap2, Tmem132b, Mctp1, Jakmip2, Dner, Cacnb4, Kif26b, D430041D05Rik, Naaladl2, Sgcz, Brinp1, Xkr6, Atp8a2, Stxbp1, Dnajc6, Brinp3, Rps2, Diaph2, Igsf8, Rpsa, Plcl1, Ubc, Ifitm3, Epas1, Cobll1, Rps4x, Actb, Rpl3, Cfl1, Cdc42, Spock2, ENSMUSG00000040904, Rps29, Rps24, B2m, Atp6v0c, Rap1a, R…	1619
GO:0006417	regulation of translation	35	5	3.12	0.19594	0.19594	3dpi	BP	NonN_8	GO:0006417	Eif1, Rpl38, Rplp1, Rps3, Samd4	144	Kcnb2, Rbfox3, Cdh18, Hs3st4, Grik1, Trhde, Dpp6, Sgcd, Pcdh10, Ntrk3, Slc8a3, Pcdh11x, Upp2, Meg3, Samd4, Cntnap2, Tmem132b, Mctp1, Jakmip2, Dner, Cacnb4, Kif26b, D430041D05Rik, Naaladl2, Sgcz, Brinp1, Xkr6, Atp8a2, Stxbp1, Dnajc6, Brinp3, Rps2, Diaph2, Igsf8, Rpsa, Plcl1, Ubc, Ifitm3, Epas1, Cobll1, Rps4x, Actb, Rpl3, Cfl1, Cdc42, Spock2, ENSMUSG00000040904, Rps29, Rps24, B2m, Atp6v0c, Rap1a, R…	1619
GO:0000302	response to reactive oxygen species	26	4	2.32	0.19615	0.19615	3dpi	BP	NonN_8	GO:0000302	Cfl1, Gstp1, Prdx1, Rps3	144	Kcnb2, Rbfox3, Cdh18, Hs3st4, Grik1, Trhde, Dpp6, Sgcd, Pcdh10, Ntrk3, Slc8a3, Pcdh11x, Upp2, Meg3, Samd4, Cntnap2, Tmem132b, Mctp1, Jakmip2, Dner, Cacnb4, Kif26b, D430041D05Rik, Naaladl2, Sgcz, Brinp1, Xkr6, Atp8a2, Stxbp1, Dnajc6, Brinp3, Rps2, Diaph2, Igsf8, Rpsa, Plcl1, Ubc, Ifitm3, Epas1, Cobll1, Rps4x, Actb, Rpl3, Cfl1, Cdc42, Spock2, ENSMUSG00000040904, Rps29, Rps24, B2m, Atp6v0c, Rap1a, R…	1619
GO:0030323	respiratory tube development	26	4	2.32	0.19615	0.19615	3dpi	BP	NonN_8	GO:0030323	Cdc42, Epas1, Meg3, Sparc	144	Kcnb2, Rbfox3, Cdh18, Hs3st4, Grik1, Trhde, Dpp6, Sgcd, Pcdh10, Ntrk3, Slc8a3, Pcdh11x, Upp2, Meg3, Samd4, Cntnap2, Tmem132b, Mctp1, Jakmip2, Dner, Cacnb4, Kif26b, D430041D05Rik, Naaladl2, Sgcz, Brinp1, Xkr6, Atp8a2, Stxbp1, Dnajc6, Brinp3, Rps2, Diaph2, Igsf8, Rpsa, Plcl1, Ubc, Ifitm3, Epas1, Cobll1, Rps4x, Actb, Rpl3, Cfl1, Cdc42, Spock2, ENSMUSG00000040904, Rps29, Rps24, B2m, Atp6v0c, Rap1a, R…	1619
GO:0030324	lung development	26	4	2.32	0.19615	0.19615	3dpi	BP	NonN_8	GO:0030324	Cdc42, Epas1, Meg3, Sparc	144	Kcnb2, Rbfox3, Cdh18, Hs3st4, Grik1, Trhde, Dpp6, Sgcd, Pcdh10, Ntrk3, Slc8a3, Pcdh11x, Upp2, Meg3, Samd4, Cntnap2, Tmem132b, Mctp1, Jakmip2, Dner, Cacnb4, Kif26b, D430041D05Rik, Naaladl2, Sgcz, Brinp1, Xkr6, Atp8a2, Stxbp1, Dnajc6, Brinp3, Rps2, Diaph2, Igsf8, Rpsa, Plcl1, Ubc, Ifitm3, Epas1, Cobll1, Rps4x, Actb, Rpl3, Cfl1, Cdc42, Spock2, ENSMUSG00000040904, Rps29, Rps24, B2m, Atp6v0c, Rap1a, R…	1619
GO:0060048	cardiac muscle contraction	26	4	2.32	0.19615	0.19615	3dpi	BP	NonN_8	GO:0060048	Atp1a2, Calm1, Calm2, Sgcd	144	Kcnb2, Rbfox3, Cdh18, Hs3st4, Grik1, Trhde, Dpp6, Sgcd, Pcdh10, Ntrk3, Slc8a3, Pcdh11x, Upp2, Meg3, Samd4, Cntnap2, Tmem132b, Mctp1, Jakmip2, Dner, Cacnb4, Kif26b, D430041D05Rik, Naaladl2, Sgcz, Brinp1, Xkr6, Atp8a2, Stxbp1, Dnajc6, Brinp3, Rps2, Diaph2, Igsf8, Rpsa, Plcl1, Ubc, Ifitm3, Epas1, Cobll1, Rps4x, Actb, Rpl3, Cfl1, Cdc42, Spock2, ENSMUSG00000040904, Rps29, Rps24, B2m, Atp6v0c, Rap1a, R…	1619
GO:0120034	positive regulation of plasma membrane b...	26	4	2.32	0.19615	0.19615	3dpi	BP	NonN_8	GO:0120034	Cdc42, Cfl1, Dynll1, Septin7	144	Kcnb2, Rbfox3, Cdh18, Hs3st4, Grik1, Trhde, Dpp6, Sgcd, Pcdh10, Ntrk3, Slc8a3, Pcdh11x, Upp2, Meg3, Samd4, Cntnap2, Tmem132b, Mctp1, Jakmip2, Dner, Cacnb4, Kif26b, D430041D05Rik, Naaladl2, Sgcz, Brinp1, Xkr6, Atp8a2, Stxbp1, Dnajc6, Brinp3, Rps2, Diaph2, Igsf8, Rpsa, Plcl1, Ubc, Ifitm3, Epas1, Cobll1, Rps4x, Actb, Rpl3, Cfl1, Cdc42, Spock2, ENSMUSG00000040904, Rps29, Rps24, B2m, Atp6v0c, Rap1a, R…	1619
GO:0006873	cellular ion homeostasis	83	10	7.4	0.19824	0.19824	3dpi	BP	NonN_8	GO:0006873	Atp1a2, Atp6v0c, Cacnb4, Calm1, Calm2, Ckb, Ftl1, Mt1, Ndfip1, Slc8a3	144	Kcnb2, Rbfox3, Cdh18, Hs3st4, Grik1, Trhde, Dpp6, Sgcd, Pcdh10, Ntrk3, Slc8a3, Pcdh11x, Upp2, Meg3, Samd4, Cntnap2, Tmem132b, Mctp1, Jakmip2, Dner, Cacnb4, Kif26b, D430041D05Rik, Naaladl2, Sgcz, Brinp1, Xkr6, Atp8a2, Stxbp1, Dnajc6, Brinp3, Rps2, Diaph2, Igsf8, Rpsa, Plcl1, Ubc, Ifitm3, Epas1, Cobll1, Rps4x, Actb, Rpl3, Cfl1, Cdc42, Spock2, ENSMUSG00000040904, Rps29, Rps24, B2m, Atp6v0c, Rap1a, R…	1619
GO:0045087	innate immune response	45	6	4.01	0.20669	0.20669	3dpi	BP	NonN_8	GO:0045087	B2m, Cdc42, Fau, Ifitm3, Prdx1, Stxbp1	144	Kcnb2, Rbfox3, Cdh18, Hs3st4, Grik1, Trhde, Dpp6, Sgcd, Pcdh10, Ntrk3, Slc8a3, Pcdh11x, Upp2, Meg3, Samd4, Cntnap2, Tmem132b, Mctp1, Jakmip2, Dner, Cacnb4, Kif26b, D430041D05Rik, Naaladl2, Sgcz, Brinp1, Xkr6, Atp8a2, Stxbp1, Dnajc6, Brinp3, Rps2, Diaph2, Igsf8, Rpsa, Plcl1, Ubc, Ifitm3, Epas1, Cobll1, Rps4x, Actb, Rpl3, Cfl1, Cdc42, Spock2, ENSMUSG00000040904, Rps29, Rps24, B2m, Atp6v0c, Rap1a, R…	1619
GO:0071900	regulation of protein serine/threonine k...	45	6	4.01	0.20669	0.20669	3dpi	BP	NonN_8	GO:0071900	Actb, Gstp1, Hsp90ab1, Ntrk3, Rps3, Slc8a3	144	Kcnb2, Rbfox3, Cdh18, Hs3st4, Grik1, Trhde, Dpp6, Sgcd, Pcdh10, Ntrk3, Slc8a3, Pcdh11x, Upp2, Meg3, Samd4, Cntnap2, Tmem132b, Mctp1, Jakmip2, Dner, Cacnb4, Kif26b, D430041D05Rik, Naaladl2, Sgcz, Brinp1, Xkr6, Atp8a2, Stxbp1, Dnajc6, Brinp3, Rps2, Diaph2, Igsf8, Rpsa, Plcl1, Ubc, Ifitm3, Epas1, Cobll1, Rps4x, Actb, Rpl3, Cfl1, Cdc42, Spock2, ENSMUSG00000040904, Rps29, Rps24, B2m, Atp6v0c, Rap1a, R…	1619
GO:0043549	regulation of kinase activity	84	10	7.49	0.20875	0.20875	3dpi	BP	NonN_8	GO:0043549	Actb, Cd81, Cdc42, Gstp1, Hsp90ab1, Ntrk3, Ppia, Rap1a, Rps3, Slc8a3	144	Kcnb2, Rbfox3, Cdh18, Hs3st4, Grik1, Trhde, Dpp6, Sgcd, Pcdh10, Ntrk3, Slc8a3, Pcdh11x, Upp2, Meg3, Samd4, Cntnap2, Tmem132b, Mctp1, Jakmip2, Dner, Cacnb4, Kif26b, D430041D05Rik, Naaladl2, Sgcz, Brinp1, Xkr6, Atp8a2, Stxbp1, Dnajc6, Brinp3, Rps2, Diaph2, Igsf8, Rpsa, Plcl1, Ubc, Ifitm3, Epas1, Cobll1, Rps4x, Actb, Rpl3, Cfl1, Cdc42, Spock2, ENSMUSG00000040904, Rps29, Rps24, B2m, Atp6v0c, Rap1a, R…	1619
GO:0031099	regeneration	18	3	1.61	0.21204	0.21204	3dpi	BP	NonN_8	GO:0031099	Cd81, Ntrk3, Ptn	144	Kcnb2, Rbfox3, Cdh18, Hs3st4, Grik1, Trhde, Dpp6, Sgcd, Pcdh10, Ntrk3, Slc8a3, Pcdh11x, Upp2, Meg3, Samd4, Cntnap2, Tmem132b, Mctp1, Jakmip2, Dner, Cacnb4, Kif26b, D430041D05Rik, Naaladl2, Sgcz, Brinp1, Xkr6, Atp8a2, Stxbp1, Dnajc6, Brinp3, Rps2, Diaph2, Igsf8, Rpsa, Plcl1, Ubc, Ifitm3, Epas1, Cobll1, Rps4x, Actb, Rpl3, Cfl1, Cdc42, Spock2, ENSMUSG00000040904, Rps29, Rps24, B2m, Atp6v0c, Rap1a, R…	1619
GO:0050670	regulation of lymphocyte proliferation	18	3	1.61	0.21204	0.21204	3dpi	BP	NonN_8	GO:0050670	Cd81, Ndfip1, Rps3	144	Kcnb2, Rbfox3, Cdh18, Hs3st4, Grik1, Trhde, Dpp6, Sgcd, Pcdh10, Ntrk3, Slc8a3, Pcdh11x, Upp2, Meg3, Samd4, Cntnap2, Tmem132b, Mctp1, Jakmip2, Dner, Cacnb4, Kif26b, D430041D05Rik, Naaladl2, Sgcz, Brinp1, Xkr6, Atp8a2, Stxbp1, Dnajc6, Brinp3, Rps2, Diaph2, Igsf8, Rpsa, Plcl1, Ubc, Ifitm3, Epas1, Cobll1, Rps4x, Actb, Rpl3, Cfl1, Cdc42, Spock2, ENSMUSG00000040904, Rps29, Rps24, B2m, Atp6v0c, Rap1a, R…	1619
GO:0051928	positive regulation of calcium ion trans...	18	3	1.61	0.21204	0.21204	3dpi	BP	NonN_8	GO:0051928	Cacnb4, Calm1, Calm2	144	Kcnb2, Rbfox3, Cdh18, Hs3st4, Grik1, Trhde, Dpp6, Sgcd, Pcdh10, Ntrk3, Slc8a3, Pcdh11x, Upp2, Meg3, Samd4, Cntnap2, Tmem132b, Mctp1, Jakmip2, Dner, Cacnb4, Kif26b, D430041D05Rik, Naaladl2, Sgcz, Brinp1, Xkr6, Atp8a2, Stxbp1, Dnajc6, Brinp3, Rps2, Diaph2, Igsf8, Rpsa, Plcl1, Ubc, Ifitm3, Epas1, Cobll1, Rps4x, Actb, Rpl3, Cfl1, Cdc42, Spock2, ENSMUSG00000040904, Rps29, Rps24, B2m, Atp6v0c, Rap1a, R…	1619
GO:0022412	cellular process involved in reproductio...	36	5	3.21	0.21234	0.21234	3dpi	BP	NonN_8	GO:0022412	Diaph2, H3f3b, Ptgds, Ptn, Ubb	144	Kcnb2, Rbfox3, Cdh18, Hs3st4, Grik1, Trhde, Dpp6, Sgcd, Pcdh10, Ntrk3, Slc8a3, Pcdh11x, Upp2, Meg3, Samd4, Cntnap2, Tmem132b, Mctp1, Jakmip2, Dner, Cacnb4, Kif26b, D430041D05Rik, Naaladl2, Sgcz, Brinp1, Xkr6, Atp8a2, Stxbp1, Dnajc6, Brinp3, Rps2, Diaph2, Igsf8, Rpsa, Plcl1, Ubc, Ifitm3, Epas1, Cobll1, Rps4x, Actb, Rpl3, Cfl1, Cdc42, Spock2, ENSMUSG00000040904, Rps29, Rps24, B2m, Atp6v0c, Rap1a, R…	1619
GO:0030307	positive regulation of cell growth	36	5	3.21	0.21234	0.21234	3dpi	BP	NonN_8	GO:0030307	Cd81, Cdc42, Cfl1, H3f3b, Ntrk3	144	Kcnb2, Rbfox3, Cdh18, Hs3st4, Grik1, Trhde, Dpp6, Sgcd, Pcdh10, Ntrk3, Slc8a3, Pcdh11x, Upp2, Meg3, Samd4, Cntnap2, Tmem132b, Mctp1, Jakmip2, Dner, Cacnb4, Kif26b, D430041D05Rik, Naaladl2, Sgcz, Brinp1, Xkr6, Atp8a2, Stxbp1, Dnajc6, Brinp3, Rps2, Diaph2, Igsf8, Rpsa, Plcl1, Ubc, Ifitm3, Epas1, Cobll1, Rps4x, Actb, Rpl3, Cfl1, Cdc42, Spock2, ENSMUSG00000040904, Rps29, Rps24, B2m, Atp6v0c, Rap1a, R…	1619
GO:0044772	mitotic cell cycle phase transition	36	5	3.21	0.21234	0.21234	3dpi	BP	NonN_8	GO:0044772	Cacnb4, Calm1, Calm2, Rpl17, Rpl24	144	Kcnb2, Rbfox3, Cdh18, Hs3st4, Grik1, Trhde, Dpp6, Sgcd, Pcdh10, Ntrk3, Slc8a3, Pcdh11x, Upp2, Meg3, Samd4, Cntnap2, Tmem132b, Mctp1, Jakmip2, Dner, Cacnb4, Kif26b, D430041D05Rik, Naaladl2, Sgcz, Brinp1, Xkr6, Atp8a2, Stxbp1, Dnajc6, Brinp3, Rps2, Diaph2, Igsf8, Rpsa, Plcl1, Ubc, Ifitm3, Epas1, Cobll1, Rps4x, Actb, Rpl3, Cfl1, Cdc42, Spock2, ENSMUSG00000040904, Rps29, Rps24, B2m, Atp6v0c, Rap1a, R…	1619
GO:0033674	positive regulation of kinase activity	55	7	4.9	0.21309	0.21309	3dpi	BP	NonN_8	GO:0033674	Cd81, Cdc42, Hsp90ab1, Ntrk3, Ppia, Rap1a, Rps3	144	Kcnb2, Rbfox3, Cdh18, Hs3st4, Grik1, Trhde, Dpp6, Sgcd, Pcdh10, Ntrk3, Slc8a3, Pcdh11x, Upp2, Meg3, Samd4, Cntnap2, Tmem132b, Mctp1, Jakmip2, Dner, Cacnb4, Kif26b, D430041D05Rik, Naaladl2, Sgcz, Brinp1, Xkr6, Atp8a2, Stxbp1, Dnajc6, Brinp3, Rps2, Diaph2, Igsf8, Rpsa, Plcl1, Ubc, Ifitm3, Epas1, Cobll1, Rps4x, Actb, Rpl3, Cfl1, Cdc42, Spock2, ENSMUSG00000040904, Rps29, Rps24, B2m, Atp6v0c, Rap1a, R…	1619
GO:1903050	regulation of proteolysis involved in ce...	27	4	2.41	0.21541	0.21541	3dpi	BP	NonN_8	GO:1903050	Hsp90ab1, Rpl11, Rpl23, Ubb	144	Kcnb2, Rbfox3, Cdh18, Hs3st4, Grik1, Trhde, Dpp6, Sgcd, Pcdh10, Ntrk3, Slc8a3, Pcdh11x, Upp2, Meg3, Samd4, Cntnap2, Tmem132b, Mctp1, Jakmip2, Dner, Cacnb4, Kif26b, D430041D05Rik, Naaladl2, Sgcz, Brinp1, Xkr6, Atp8a2, Stxbp1, Dnajc6, Brinp3, Rps2, Diaph2, Igsf8, Rpsa, Plcl1, Ubc, Ifitm3, Epas1, Cobll1, Rps4x, Actb, Rpl3, Cfl1, Cdc42, Spock2, ENSMUSG00000040904, Rps29, Rps24, B2m, Atp6v0c, Rap1a, R…	1619
GO:0051248	negative regulation of protein metabolic...	115	13	10.25	0.21729	0.21729	3dpi	BP	NonN_8	GO:0051248	Actb, Cst3, Gstp1, Hsp90ab1, Itm2b, Ntrk3, Pfdn5, Ppia, Rpl11, Rpl23, Rps3, Samd4, Slc8a3	144	Kcnb2, Rbfox3, Cdh18, Hs3st4, Grik1, Trhde, Dpp6, Sgcd, Pcdh10, Ntrk3, Slc8a3, Pcdh11x, Upp2, Meg3, Samd4, Cntnap2, Tmem132b, Mctp1, Jakmip2, Dner, Cacnb4, Kif26b, D430041D05Rik, Naaladl2, Sgcz, Brinp1, Xkr6, Atp8a2, Stxbp1, Dnajc6, Brinp3, Rps2, Diaph2, Igsf8, Rpsa, Plcl1, Ubc, Ifitm3, Epas1, Cobll1, Rps4x, Actb, Rpl3, Cfl1, Cdc42, Spock2, ENSMUSG00000040904, Rps29, Rps24, B2m, Atp6v0c, Rap1a, R…	1619
GO:0001505	regulation of neurotransmitter levels	46	6	4.1	0.22144	0.22144	3dpi	BP	NonN_8	GO:0001505	Atp1a2, Cacnb4, Calm1, Mctp1, Rap1a, Stxbp1	144	Kcnb2, Rbfox3, Cdh18, Hs3st4, Grik1, Trhde, Dpp6, Sgcd, Pcdh10, Ntrk3, Slc8a3, Pcdh11x, Upp2, Meg3, Samd4, Cntnap2, Tmem132b, Mctp1, Jakmip2, Dner, Cacnb4, Kif26b, D430041D05Rik, Naaladl2, Sgcz, Brinp1, Xkr6, Atp8a2, Stxbp1, Dnajc6, Brinp3, Rps2, Diaph2, Igsf8, Rpsa, Plcl1, Ubc, Ifitm3, Epas1, Cobll1, Rps4x, Actb, Rpl3, Cfl1, Cdc42, Spock2, ENSMUSG00000040904, Rps29, Rps24, B2m, Atp6v0c, Rap1a, R…	1619
GO:0006836	neurotransmitter transport	46	6	4.1	0.22144	0.22144	3dpi	BP	NonN_8	GO:0006836	Atp1a2, Cacnb4, Calm1, Mctp1, Rap1a, Stxbp1	144	Kcnb2, Rbfox3, Cdh18, Hs3st4, Grik1, Trhde, Dpp6, Sgcd, Pcdh10, Ntrk3, Slc8a3, Pcdh11x, Upp2, Meg3, Samd4, Cntnap2, Tmem132b, Mctp1, Jakmip2, Dner, Cacnb4, Kif26b, D430041D05Rik, Naaladl2, Sgcz, Brinp1, Xkr6, Atp8a2, Stxbp1, Dnajc6, Brinp3, Rps2, Diaph2, Igsf8, Rpsa, Plcl1, Ubc, Ifitm3, Epas1, Cobll1, Rps4x, Actb, Rpl3, Cfl1, Cdc42, Spock2, ENSMUSG00000040904, Rps29, Rps24, B2m, Atp6v0c, Rap1a, R…	1619
GO:0002456	T cell mediated immunity	10	2	0.89	0.22203	0.22203	3dpi	BP	NonN_8	GO:0002456	B2m, Cd81	144	Kcnb2, Rbfox3, Cdh18, Hs3st4, Grik1, Trhde, Dpp6, Sgcd, Pcdh10, Ntrk3, Slc8a3, Pcdh11x, Upp2, Meg3, Samd4, Cntnap2, Tmem132b, Mctp1, Jakmip2, Dner, Cacnb4, Kif26b, D430041D05Rik, Naaladl2, Sgcz, Brinp1, Xkr6, Atp8a2, Stxbp1, Dnajc6, Brinp3, Rps2, Diaph2, Igsf8, Rpsa, Plcl1, Ubc, Ifitm3, Epas1, Cobll1, Rps4x, Actb, Rpl3, Cfl1, Cdc42, Spock2, ENSMUSG00000040904, Rps29, Rps24, B2m, Atp6v0c, Rap1a, R…	1619
GO:0006694	steroid biosynthetic process	10	2	0.89	0.22203	0.22203	3dpi	BP	NonN_8	GO:0006694	Igfbp7, Pde8b	144	Kcnb2, Rbfox3, Cdh18, Hs3st4, Grik1, Trhde, Dpp6, Sgcd, Pcdh10, Ntrk3, Slc8a3, Pcdh11x, Upp2, Meg3, Samd4, Cntnap2, Tmem132b, Mctp1, Jakmip2, Dner, Cacnb4, Kif26b, D430041D05Rik, Naaladl2, Sgcz, Brinp1, Xkr6, Atp8a2, Stxbp1, Dnajc6, Brinp3, Rps2, Diaph2, Igsf8, Rpsa, Plcl1, Ubc, Ifitm3, Epas1, Cobll1, Rps4x, Actb, Rpl3, Cfl1, Cdc42, Spock2, ENSMUSG00000040904, Rps29, Rps24, B2m, Atp6v0c, Rap1a, R…	1619
GO:0006911	phagocytosis, engulfment	10	2	0.89	0.22203	0.22203	3dpi	BP	NonN_8	GO:0006911	Cdc42, Xkr6	144	Kcnb2, Rbfox3, Cdh18, Hs3st4, Grik1, Trhde, Dpp6, Sgcd, Pcdh10, Ntrk3, Slc8a3, Pcdh11x, Upp2, Meg3, Samd4, Cntnap2, Tmem132b, Mctp1, Jakmip2, Dner, Cacnb4, Kif26b, D430041D05Rik, Naaladl2, Sgcz, Brinp1, Xkr6, Atp8a2, Stxbp1, Dnajc6, Brinp3, Rps2, Diaph2, Igsf8, Rpsa, Plcl1, Ubc, Ifitm3, Epas1, Cobll1, Rps4x, Actb, Rpl3, Cfl1, Cdc42, Spock2, ENSMUSG00000040904, Rps29, Rps24, B2m, Atp6v0c, Rap1a, R…	1619
GO:0007214	gamma-aminobutyric acid signaling pathwa...	10	2	0.89	0.22203	0.22203	3dpi	BP	NonN_8	GO:0007214	Cacnb4, Plcl1	144	Kcnb2, Rbfox3, Cdh18, Hs3st4, Grik1, Trhde, Dpp6, Sgcd, Pcdh10, Ntrk3, Slc8a3, Pcdh11x, Upp2, Meg3, Samd4, Cntnap2, Tmem132b, Mctp1, Jakmip2, Dner, Cacnb4, Kif26b, D430041D05Rik, Naaladl2, Sgcz, Brinp1, Xkr6, Atp8a2, Stxbp1, Dnajc6, Brinp3, Rps2, Diaph2, Igsf8, Rpsa, Plcl1, Ubc, Ifitm3, Epas1, Cobll1, Rps4x, Actb, Rpl3, Cfl1, Cdc42, Spock2, ENSMUSG00000040904, Rps29, Rps24, B2m, Atp6v0c, Rap1a, R…	1619
GO:0007528	neuromuscular junction development	10	2	0.89	0.22203	0.22203	3dpi	BP	NonN_8	GO:0007528	Cacnb4, Ptn	144	Kcnb2, Rbfox3, Cdh18, Hs3st4, Grik1, Trhde, Dpp6, Sgcd, Pcdh10, Ntrk3, Slc8a3, Pcdh11x, Upp2, Meg3, Samd4, Cntnap2, Tmem132b, Mctp1, Jakmip2, Dner, Cacnb4, Kif26b, D430041D05Rik, Naaladl2, Sgcz, Brinp1, Xkr6, Atp8a2, Stxbp1, Dnajc6, Brinp3, Rps2, Diaph2, Igsf8, Rpsa, Plcl1, Ubc, Ifitm3, Epas1, Cobll1, Rps4x, Actb, Rpl3, Cfl1, Cdc42, Spock2, ENSMUSG00000040904, Rps29, Rps24, B2m, Atp6v0c, Rap1a, R…	1619
GO:0010591	regulation of lamellipodium assembly	10	2	0.89	0.22203	0.22203	3dpi	BP	NonN_8	GO:0010591	Cdc42, Cfl1	144	Kcnb2, Rbfox3, Cdh18, Hs3st4, Grik1, Trhde, Dpp6, Sgcd, Pcdh10, Ntrk3, Slc8a3, Pcdh11x, Upp2, Meg3, Samd4, Cntnap2, Tmem132b, Mctp1, Jakmip2, Dner, Cacnb4, Kif26b, D430041D05Rik, Naaladl2, Sgcz, Brinp1, Xkr6, Atp8a2, Stxbp1, Dnajc6, Brinp3, Rps2, Diaph2, Igsf8, Rpsa, Plcl1, Ubc, Ifitm3, Epas1, Cobll1, Rps4x, Actb, Rpl3, Cfl1, Cdc42, Spock2, ENSMUSG00000040904, Rps29, Rps24, B2m, Atp6v0c, Rap1a, R…	1619
GO:0010592	positive regulation of lamellipodium ass...	10	2	0.89	0.22203	0.22203	3dpi	BP	NonN_8	GO:0010592	Cdc42, Cfl1	144	Kcnb2, Rbfox3, Cdh18, Hs3st4, Grik1, Trhde, Dpp6, Sgcd, Pcdh10, Ntrk3, Slc8a3, Pcdh11x, Upp2, Meg3, Samd4, Cntnap2, Tmem132b, Mctp1, Jakmip2, Dner, Cacnb4, Kif26b, D430041D05Rik, Naaladl2, Sgcz, Brinp1, Xkr6, Atp8a2, Stxbp1, Dnajc6, Brinp3, Rps2, Diaph2, Igsf8, Rpsa, Plcl1, Ubc, Ifitm3, Epas1, Cobll1, Rps4x, Actb, Rpl3, Cfl1, Cdc42, Spock2, ENSMUSG00000040904, Rps29, Rps24, B2m, Atp6v0c, Rap1a, R…	1619
GO:0014031	mesenchymal cell development	10	2	0.89	0.22203	0.22203	3dpi	BP	NonN_8	GO:0014031	Cdc42, Cfl1	144	Kcnb2, Rbfox3, Cdh18, Hs3st4, Grik1, Trhde, Dpp6, Sgcd, Pcdh10, Ntrk3, Slc8a3, Pcdh11x, Upp2, Meg3, Samd4, Cntnap2, Tmem132b, Mctp1, Jakmip2, Dner, Cacnb4, Kif26b, D430041D05Rik, Naaladl2, Sgcz, Brinp1, Xkr6, Atp8a2, Stxbp1, Dnajc6, Brinp3, Rps2, Diaph2, Igsf8, Rpsa, Plcl1, Ubc, Ifitm3, Epas1, Cobll1, Rps4x, Actb, Rpl3, Cfl1, Cdc42, Spock2, ENSMUSG00000040904, Rps29, Rps24, B2m, Atp6v0c, Rap1a, R…	1619
GO:0031102	neuron projection regeneration	10	2	0.89	0.22203	0.22203	3dpi	BP	NonN_8	GO:0031102	Ntrk3, Ptn	144	Kcnb2, Rbfox3, Cdh18, Hs3st4, Grik1, Trhde, Dpp6, Sgcd, Pcdh10, Ntrk3, Slc8a3, Pcdh11x, Upp2, Meg3, Samd4, Cntnap2, Tmem132b, Mctp1, Jakmip2, Dner, Cacnb4, Kif26b, D430041D05Rik, Naaladl2, Sgcz, Brinp1, Xkr6, Atp8a2, Stxbp1, Dnajc6, Brinp3, Rps2, Diaph2, Igsf8, Rpsa, Plcl1, Ubc, Ifitm3, Epas1, Cobll1, Rps4x, Actb, Rpl3, Cfl1, Cdc42, Spock2, ENSMUSG00000040904, Rps29, Rps24, B2m, Atp6v0c, Rap1a, R…	1619
GO:0031103	axon regeneration	10	2	0.89	0.22203	0.22203	3dpi	BP	NonN_8	GO:0031103	Ntrk3, Ptn	144	Kcnb2, Rbfox3, Cdh18, Hs3st4, Grik1, Trhde, Dpp6, Sgcd, Pcdh10, Ntrk3, Slc8a3, Pcdh11x, Upp2, Meg3, Samd4, Cntnap2, Tmem132b, Mctp1, Jakmip2, Dner, Cacnb4, Kif26b, D430041D05Rik, Naaladl2, Sgcz, Brinp1, Xkr6, Atp8a2, Stxbp1, Dnajc6, Brinp3, Rps2, Diaph2, Igsf8, Rpsa, Plcl1, Ubc, Ifitm3, Epas1, Cobll1, Rps4x, Actb, Rpl3, Cfl1, Cdc42, Spock2, ENSMUSG00000040904, Rps29, Rps24, B2m, Atp6v0c, Rap1a, R…	1619
GO:0042102	positive regulation of T cell proliferat...	10	2	0.89	0.22203	0.22203	3dpi	BP	NonN_8	GO:0042102	Cd81, Rps3	144	Kcnb2, Rbfox3, Cdh18, Hs3st4, Grik1, Trhde, Dpp6, Sgcd, Pcdh10, Ntrk3, Slc8a3, Pcdh11x, Upp2, Meg3, Samd4, Cntnap2, Tmem132b, Mctp1, Jakmip2, Dner, Cacnb4, Kif26b, D430041D05Rik, Naaladl2, Sgcz, Brinp1, Xkr6, Atp8a2, Stxbp1, Dnajc6, Brinp3, Rps2, Diaph2, Igsf8, Rpsa, Plcl1, Ubc, Ifitm3, Epas1, Cobll1, Rps4x, Actb, Rpl3, Cfl1, Cdc42, Spock2, ENSMUSG00000040904, Rps29, Rps24, B2m, Atp6v0c, Rap1a, R…	1619
GO:0043299	leukocyte degranulation	10	2	0.89	0.22203	0.22203	3dpi	BP	NonN_8	GO:0043299	Ptgds, Stxbp1	144	Kcnb2, Rbfox3, Cdh18, Hs3st4, Grik1, Trhde, Dpp6, Sgcd, Pcdh10, Ntrk3, Slc8a3, Pcdh11x, Upp2, Meg3, Samd4, Cntnap2, Tmem132b, Mctp1, Jakmip2, Dner, Cacnb4, Kif26b, D430041D05Rik, Naaladl2, Sgcz, Brinp1, Xkr6, Atp8a2, Stxbp1, Dnajc6, Brinp3, Rps2, Diaph2, Igsf8, Rpsa, Plcl1, Ubc, Ifitm3, Epas1, Cobll1, Rps4x, Actb, Rpl3, Cfl1, Cdc42, Spock2, ENSMUSG00000040904, Rps29, Rps24, B2m, Atp6v0c, Rap1a, R…	1619
GO:0048663	neuron fate commitment	10	2	0.89	0.22203	0.22203	3dpi	BP	NonN_8	GO:0048663	Cdc42, Ntrk3	144	Kcnb2, Rbfox3, Cdh18, Hs3st4, Grik1, Trhde, Dpp6, Sgcd, Pcdh10, Ntrk3, Slc8a3, Pcdh11x, Upp2, Meg3, Samd4, Cntnap2, Tmem132b, Mctp1, Jakmip2, Dner, Cacnb4, Kif26b, D430041D05Rik, Naaladl2, Sgcz, Brinp1, Xkr6, Atp8a2, Stxbp1, Dnajc6, Brinp3, Rps2, Diaph2, Igsf8, Rpsa, Plcl1, Ubc, Ifitm3, Epas1, Cobll1, Rps4x, Actb, Rpl3, Cfl1, Cdc42, Spock2, ENSMUSG00000040904, Rps29, Rps24, B2m, Atp6v0c, Rap1a, R…	1619
GO:0051701	biological process involved in interacti...	10	2	0.89	0.22203	0.22203	3dpi	BP	NonN_8	GO:0051701	Bsg, Ifitm3	144	Kcnb2, Rbfox3, Cdh18, Hs3st4, Grik1, Trhde, Dpp6, Sgcd, Pcdh10, Ntrk3, Slc8a3, Pcdh11x, Upp2, Meg3, Samd4, Cntnap2, Tmem132b, Mctp1, Jakmip2, Dner, Cacnb4, Kif26b, D430041D05Rik, Naaladl2, Sgcz, Brinp1, Xkr6, Atp8a2, Stxbp1, Dnajc6, Brinp3, Rps2, Diaph2, Igsf8, Rpsa, Plcl1, Ubc, Ifitm3, Epas1, Cobll1, Rps4x, Actb, Rpl3, Cfl1, Cdc42, Spock2, ENSMUSG00000040904, Rps29, Rps24, B2m, Atp6v0c, Rap1a, R…	1619
GO:0052126	movement in host environment	10	2	0.89	0.22203	0.22203	3dpi	BP	NonN_8	GO:0052126	Bsg, Ifitm3	144	Kcnb2, Rbfox3, Cdh18, Hs3st4, Grik1, Trhde, Dpp6, Sgcd, Pcdh10, Ntrk3, Slc8a3, Pcdh11x, Upp2, Meg3, Samd4, Cntnap2, Tmem132b, Mctp1, Jakmip2, Dner, Cacnb4, Kif26b, D430041D05Rik, Naaladl2, Sgcz, Brinp1, Xkr6, Atp8a2, Stxbp1, Dnajc6, Brinp3, Rps2, Diaph2, Igsf8, Rpsa, Plcl1, Ubc, Ifitm3, Epas1, Cobll1, Rps4x, Actb, Rpl3, Cfl1, Cdc42, Spock2, ENSMUSG00000040904, Rps29, Rps24, B2m, Atp6v0c, Rap1a, R…	1619
GO:0070296	sarcoplasmic reticulum calcium ion trans...	10	2	0.89	0.22203	0.22203	3dpi	BP	NonN_8	GO:0070296	Calm1, Calm2	144	Kcnb2, Rbfox3, Cdh18, Hs3st4, Grik1, Trhde, Dpp6, Sgcd, Pcdh10, Ntrk3, Slc8a3, Pcdh11x, Upp2, Meg3, Samd4, Cntnap2, Tmem132b, Mctp1, Jakmip2, Dner, Cacnb4, Kif26b, D430041D05Rik, Naaladl2, Sgcz, Brinp1, Xkr6, Atp8a2, Stxbp1, Dnajc6, Brinp3, Rps2, Diaph2, Igsf8, Rpsa, Plcl1, Ubc, Ifitm3, Epas1, Cobll1, Rps4x, Actb, Rpl3, Cfl1, Cdc42, Spock2, ENSMUSG00000040904, Rps29, Rps24, B2m, Atp6v0c, Rap1a, R…	1619
GO:0071320	cellular response to cAMP	10	2	0.89	0.22203	0.22203	3dpi	BP	NonN_8	GO:0071320	Rap1a, Slc8a3	144	Kcnb2, Rbfox3, Cdh18, Hs3st4, Grik1, Trhde, Dpp6, Sgcd, Pcdh10, Ntrk3, Slc8a3, Pcdh11x, Upp2, Meg3, Samd4, Cntnap2, Tmem132b, Mctp1, Jakmip2, Dner, Cacnb4, Kif26b, D430041D05Rik, Naaladl2, Sgcz, Brinp1, Xkr6, Atp8a2, Stxbp1, Dnajc6, Brinp3, Rps2, Diaph2, Igsf8, Rpsa, Plcl1, Ubc, Ifitm3, Epas1, Cobll1, Rps4x, Actb, Rpl3, Cfl1, Cdc42, Spock2, ENSMUSG00000040904, Rps29, Rps24, B2m, Atp6v0c, Rap1a, R…	1619
GO:0099563	modification of synaptic structure	10	2	0.89	0.22203	0.22203	3dpi	BP	NonN_8	GO:0099563	Cdc42, Cfl1	144	Kcnb2, Rbfox3, Cdh18, Hs3st4, Grik1, Trhde, Dpp6, Sgcd, Pcdh10, Ntrk3, Slc8a3, Pcdh11x, Upp2, Meg3, Samd4, Cntnap2, Tmem132b, Mctp1, Jakmip2, Dner, Cacnb4, Kif26b, D430041D05Rik, Naaladl2, Sgcz, Brinp1, Xkr6, Atp8a2, Stxbp1, Dnajc6, Brinp3, Rps2, Diaph2, Igsf8, Rpsa, Plcl1, Ubc, Ifitm3, Epas1, Cobll1, Rps4x, Actb, Rpl3, Cfl1, Cdc42, Spock2, ENSMUSG00000040904, Rps29, Rps24, B2m, Atp6v0c, Rap1a, R…	1619
GO:1900182	positive regulation of protein localizat...	10	2	0.89	0.22203	0.22203	3dpi	BP	NonN_8	GO:1900182	Cacnb4, Hsp90ab1	144	Kcnb2, Rbfox3, Cdh18, Hs3st4, Grik1, Trhde, Dpp6, Sgcd, Pcdh10, Ntrk3, Slc8a3, Pcdh11x, Upp2, Meg3, Samd4, Cntnap2, Tmem132b, Mctp1, Jakmip2, Dner, Cacnb4, Kif26b, D430041D05Rik, Naaladl2, Sgcz, Brinp1, Xkr6, Atp8a2, Stxbp1, Dnajc6, Brinp3, Rps2, Diaph2, Igsf8, Rpsa, Plcl1, Ubc, Ifitm3, Epas1, Cobll1, Rps4x, Actb, Rpl3, Cfl1, Cdc42, Spock2, ENSMUSG00000040904, Rps29, Rps24, B2m, Atp6v0c, Rap1a, R…	1619
GO:2000241	regulation of reproductive process	10	2	0.89	0.22203	0.22203	3dpi	BP	NonN_8	GO:2000241	Ptgds, Stxbp1	144	Kcnb2, Rbfox3, Cdh18, Hs3st4, Grik1, Trhde, Dpp6, Sgcd, Pcdh10, Ntrk3, Slc8a3, Pcdh11x, Upp2, Meg3, Samd4, Cntnap2, Tmem132b, Mctp1, Jakmip2, Dner, Cacnb4, Kif26b, D430041D05Rik, Naaladl2, Sgcz, Brinp1, Xkr6, Atp8a2, Stxbp1, Dnajc6, Brinp3, Rps2, Diaph2, Igsf8, Rpsa, Plcl1, Ubc, Ifitm3, Epas1, Cobll1, Rps4x, Actb, Rpl3, Cfl1, Cdc42, Spock2, ENSMUSG00000040904, Rps29, Rps24, B2m, Atp6v0c, Rap1a, R…	1619
GO:2000249	regulation of actin cytoskeleton reorgan...	10	2	0.89	0.22203	0.22203	3dpi	BP	NonN_8	GO:2000249	Cdc42, Ntrk3	144	Kcnb2, Rbfox3, Cdh18, Hs3st4, Grik1, Trhde, Dpp6, Sgcd, Pcdh10, Ntrk3, Slc8a3, Pcdh11x, Upp2, Meg3, Samd4, Cntnap2, Tmem132b, Mctp1, Jakmip2, Dner, Cacnb4, Kif26b, D430041D05Rik, Naaladl2, Sgcz, Brinp1, Xkr6, Atp8a2, Stxbp1, Dnajc6, Brinp3, Rps2, Diaph2, Igsf8, Rpsa, Plcl1, Ubc, Ifitm3, Epas1, Cobll1, Rps4x, Actb, Rpl3, Cfl1, Cdc42, Spock2, ENSMUSG00000040904, Rps29, Rps24, B2m, Atp6v0c, Rap1a, R…	1619
GO:0002252	immune effector process	56	7	4.99	0.22658	0.22658	3dpi	BP	NonN_8	GO:0002252	B2m, Cd81, Ndfip1, Prdx1, Ptgds, Rap1a, Stxbp1	144	Kcnb2, Rbfox3, Cdh18, Hs3st4, Grik1, Trhde, Dpp6, Sgcd, Pcdh10, Ntrk3, Slc8a3, Pcdh11x, Upp2, Meg3, Samd4, Cntnap2, Tmem132b, Mctp1, Jakmip2, Dner, Cacnb4, Kif26b, D430041D05Rik, Naaladl2, Sgcz, Brinp1, Xkr6, Atp8a2, Stxbp1, Dnajc6, Brinp3, Rps2, Diaph2, Igsf8, Rpsa, Plcl1, Ubc, Ifitm3, Epas1, Cobll1, Rps4x, Actb, Rpl3, Cfl1, Cdc42, Spock2, ENSMUSG00000040904, Rps29, Rps24, B2m, Atp6v0c, Rap1a, R…	1619
GO:0072659	protein localization to plasma membrane	56	7	4.99	0.22658	0.22658	3dpi	BP	NonN_8	GO:0072659	Actb, Bsg, Cd81, Dpp6, Kcnb2, Rap1a, Stxbp1	144	Kcnb2, Rbfox3, Cdh18, Hs3st4, Grik1, Trhde, Dpp6, Sgcd, Pcdh10, Ntrk3, Slc8a3, Pcdh11x, Upp2, Meg3, Samd4, Cntnap2, Tmem132b, Mctp1, Jakmip2, Dner, Cacnb4, Kif26b, D430041D05Rik, Naaladl2, Sgcz, Brinp1, Xkr6, Atp8a2, Stxbp1, Dnajc6, Brinp3, Rps2, Diaph2, Igsf8, Rpsa, Plcl1, Ubc, Ifitm3, Epas1, Cobll1, Rps4x, Actb, Rpl3, Cfl1, Cdc42, Spock2, ENSMUSG00000040904, Rps29, Rps24, B2m, Atp6v0c, Rap1a, R…	1619
GO:0042592	homeostatic process	199	21	17.74	0.22725	0.48440	3dpi	BP	NonN_8	GO:0042592	Aldoa, Atp1a2, Atp6v0c, B2m, Bsg, Cacnb4, Calm1, Calm2, Ckb, Epas1, Ftl1, Mt1, Ndfip1, Pde8b, Plcl1, Prdx1, Rps14, Rps24, Sgcd, Slc8a3, Ubb	144	Kcnb2, Rbfox3, Cdh18, Hs3st4, Grik1, Trhde, Dpp6, Sgcd, Pcdh10, Ntrk3, Slc8a3, Pcdh11x, Upp2, Meg3, Samd4, Cntnap2, Tmem132b, Mctp1, Jakmip2, Dner, Cacnb4, Kif26b, D430041D05Rik, Naaladl2, Sgcz, Brinp1, Xkr6, Atp8a2, Stxbp1, Dnajc6, Brinp3, Rps2, Diaph2, Igsf8, Rpsa, Plcl1, Ubc, Ifitm3, Epas1, Cobll1, Rps4x, Actb, Rpl3, Cfl1, Cdc42, Spock2, ENSMUSG00000040904, Rps29, Rps24, B2m, Atp6v0c, Rap1a, R…	1619
GO:0031347	regulation of defense response	37	5	3.3	0.22916	0.22916	3dpi	BP	NonN_8	GO:0031347	Cd81, Gpx4, Gstp1, Ndfip1, Ndufc2	144	Kcnb2, Rbfox3, Cdh18, Hs3st4, Grik1, Trhde, Dpp6, Sgcd, Pcdh10, Ntrk3, Slc8a3, Pcdh11x, Upp2, Meg3, Samd4, Cntnap2, Tmem132b, Mctp1, Jakmip2, Dner, Cacnb4, Kif26b, D430041D05Rik, Naaladl2, Sgcz, Brinp1, Xkr6, Atp8a2, Stxbp1, Dnajc6, Brinp3, Rps2, Diaph2, Igsf8, Rpsa, Plcl1, Ubc, Ifitm3, Epas1, Cobll1, Rps4x, Actb, Rpl3, Cfl1, Cdc42, Spock2, ENSMUSG00000040904, Rps29, Rps24, B2m, Atp6v0c, Rap1a, R…	1619
GO:0051347	positive regulation of transferase activ...	66	8	5.89	0.22930	0.22930	3dpi	BP	NonN_8	GO:0051347	Cd81, Cdc42, Hsp90ab1, Ntrk3, Ppia, Rap1a, Rps2, Rps3	144	Kcnb2, Rbfox3, Cdh18, Hs3st4, Grik1, Trhde, Dpp6, Sgcd, Pcdh10, Ntrk3, Slc8a3, Pcdh11x, Upp2, Meg3, Samd4, Cntnap2, Tmem132b, Mctp1, Jakmip2, Dner, Cacnb4, Kif26b, D430041D05Rik, Naaladl2, Sgcz, Brinp1, Xkr6, Atp8a2, Stxbp1, Dnajc6, Brinp3, Rps2, Diaph2, Igsf8, Rpsa, Plcl1, Ubc, Ifitm3, Epas1, Cobll1, Rps4x, Actb, Rpl3, Cfl1, Cdc42, Spock2, ENSMUSG00000040904, Rps29, Rps24, B2m, Atp6v0c, Rap1a, R…	1619
GO:0002263	cell activation involved in immune respo...	28	4	2.5	0.23516	0.23516	3dpi	BP	NonN_8	GO:0002263	Cd81, Ndfip1, Ptgds, Stxbp1	144	Kcnb2, Rbfox3, Cdh18, Hs3st4, Grik1, Trhde, Dpp6, Sgcd, Pcdh10, Ntrk3, Slc8a3, Pcdh11x, Upp2, Meg3, Samd4, Cntnap2, Tmem132b, Mctp1, Jakmip2, Dner, Cacnb4, Kif26b, D430041D05Rik, Naaladl2, Sgcz, Brinp1, Xkr6, Atp8a2, Stxbp1, Dnajc6, Brinp3, Rps2, Diaph2, Igsf8, Rpsa, Plcl1, Ubc, Ifitm3, Epas1, Cobll1, Rps4x, Actb, Rpl3, Cfl1, Cdc42, Spock2, ENSMUSG00000040904, Rps29, Rps24, B2m, Atp6v0c, Rap1a, R…	1619
GO:0002366	leukocyte activation involved in immune ...	28	4	2.5	0.23516	0.23516	3dpi	BP	NonN_8	GO:0002366	Cd81, Ndfip1, Ptgds, Stxbp1	144	Kcnb2, Rbfox3, Cdh18, Hs3st4, Grik1, Trhde, Dpp6, Sgcd, Pcdh10, Ntrk3, Slc8a3, Pcdh11x, Upp2, Meg3, Samd4, Cntnap2, Tmem132b, Mctp1, Jakmip2, Dner, Cacnb4, Kif26b, D430041D05Rik, Naaladl2, Sgcz, Brinp1, Xkr6, Atp8a2, Stxbp1, Dnajc6, Brinp3, Rps2, Diaph2, Igsf8, Rpsa, Plcl1, Ubc, Ifitm3, Epas1, Cobll1, Rps4x, Actb, Rpl3, Cfl1, Cdc42, Spock2, ENSMUSG00000040904, Rps29, Rps24, B2m, Atp6v0c, Rap1a, R…	1619
GO:0022409	positive regulation of cell-cell adhesio...	28	4	2.5	0.23516	0.23516	3dpi	BP	NonN_8	GO:0022409	B2m, Cd81, Kif26b, Rps3	144	Kcnb2, Rbfox3, Cdh18, Hs3st4, Grik1, Trhde, Dpp6, Sgcd, Pcdh10, Ntrk3, Slc8a3, Pcdh11x, Upp2, Meg3, Samd4, Cntnap2, Tmem132b, Mctp1, Jakmip2, Dner, Cacnb4, Kif26b, D430041D05Rik, Naaladl2, Sgcz, Brinp1, Xkr6, Atp8a2, Stxbp1, Dnajc6, Brinp3, Rps2, Diaph2, Igsf8, Rpsa, Plcl1, Ubc, Ifitm3, Epas1, Cobll1, Rps4x, Actb, Rpl3, Cfl1, Cdc42, Spock2, ENSMUSG00000040904, Rps29, Rps24, B2m, Atp6v0c, Rap1a, R…	1619
GO:0050863	regulation of T cell activation	28	4	2.5	0.23516	0.23516	3dpi	BP	NonN_8	GO:0050863	B2m, Cd81, Ndfip1, Rps3	144	Kcnb2, Rbfox3, Cdh18, Hs3st4, Grik1, Trhde, Dpp6, Sgcd, Pcdh10, Ntrk3, Slc8a3, Pcdh11x, Upp2, Meg3, Samd4, Cntnap2, Tmem132b, Mctp1, Jakmip2, Dner, Cacnb4, Kif26b, D430041D05Rik, Naaladl2, Sgcz, Brinp1, Xkr6, Atp8a2, Stxbp1, Dnajc6, Brinp3, Rps2, Diaph2, Igsf8, Rpsa, Plcl1, Ubc, Ifitm3, Epas1, Cobll1, Rps4x, Actb, Rpl3, Cfl1, Cdc42, Spock2, ENSMUSG00000040904, Rps29, Rps24, B2m, Atp6v0c, Rap1a, R…	1619
GO:0060541	respiratory system development	28	4	2.5	0.23516	0.23516	3dpi	BP	NonN_8	GO:0060541	Cdc42, Epas1, Meg3, Sparc	144	Kcnb2, Rbfox3, Cdh18, Hs3st4, Grik1, Trhde, Dpp6, Sgcd, Pcdh10, Ntrk3, Slc8a3, Pcdh11x, Upp2, Meg3, Samd4, Cntnap2, Tmem132b, Mctp1, Jakmip2, Dner, Cacnb4, Kif26b, D430041D05Rik, Naaladl2, Sgcz, Brinp1, Xkr6, Atp8a2, Stxbp1, Dnajc6, Brinp3, Rps2, Diaph2, Igsf8, Rpsa, Plcl1, Ubc, Ifitm3, Epas1, Cobll1, Rps4x, Actb, Rpl3, Cfl1, Cdc42, Spock2, ENSMUSG00000040904, Rps29, Rps24, B2m, Atp6v0c, Rap1a, R…	1619
GO:0006955	immune response	117	13	10.43	0.23625	0.23625	3dpi	BP	NonN_8	GO:0006955	B2m, Cacnb4, Cd81, Cdc42, Fau, Ifitm3, Ndfip1, Prdx1, Ptgds, Rap1a, Rpl30, Rps3, Stxbp1	144	Kcnb2, Rbfox3, Cdh18, Hs3st4, Grik1, Trhde, Dpp6, Sgcd, Pcdh10, Ntrk3, Slc8a3, Pcdh11x, Upp2, Meg3, Samd4, Cntnap2, Tmem132b, Mctp1, Jakmip2, Dner, Cacnb4, Kif26b, D430041D05Rik, Naaladl2, Sgcz, Brinp1, Xkr6, Atp8a2, Stxbp1, Dnajc6, Brinp3, Rps2, Diaph2, Igsf8, Rpsa, Plcl1, Ubc, Ifitm3, Epas1, Cobll1, Rps4x, Actb, Rpl3, Cfl1, Cdc42, Spock2, ENSMUSG00000040904, Rps29, Rps24, B2m, Atp6v0c, Rap1a, R…	1619
GO:0090316	positive regulation of intracellular pro...	19	3	1.69	0.23647	0.23647	3dpi	BP	NonN_8	GO:0090316	Cd81, Cdc42, Hsp90ab1	144	Kcnb2, Rbfox3, Cdh18, Hs3st4, Grik1, Trhde, Dpp6, Sgcd, Pcdh10, Ntrk3, Slc8a3, Pcdh11x, Upp2, Meg3, Samd4, Cntnap2, Tmem132b, Mctp1, Jakmip2, Dner, Cacnb4, Kif26b, D430041D05Rik, Naaladl2, Sgcz, Brinp1, Xkr6, Atp8a2, Stxbp1, Dnajc6, Brinp3, Rps2, Diaph2, Igsf8, Rpsa, Plcl1, Ubc, Ifitm3, Epas1, Cobll1, Rps4x, Actb, Rpl3, Cfl1, Cdc42, Spock2, ENSMUSG00000040904, Rps29, Rps24, B2m, Atp6v0c, Rap1a, R…	1619
GO:1905477	positive regulation of protein localizat...	19	3	1.69	0.23647	0.23647	3dpi	BP	NonN_8	GO:1905477	Cd81, Dpp6, Ptn	144	Kcnb2, Rbfox3, Cdh18, Hs3st4, Grik1, Trhde, Dpp6, Sgcd, Pcdh10, Ntrk3, Slc8a3, Pcdh11x, Upp2, Meg3, Samd4, Cntnap2, Tmem132b, Mctp1, Jakmip2, Dner, Cacnb4, Kif26b, D430041D05Rik, Naaladl2, Sgcz, Brinp1, Xkr6, Atp8a2, Stxbp1, Dnajc6, Brinp3, Rps2, Diaph2, Igsf8, Rpsa, Plcl1, Ubc, Ifitm3, Epas1, Cobll1, Rps4x, Actb, Rpl3, Cfl1, Cdc42, Spock2, ENSMUSG00000040904, Rps29, Rps24, B2m, Atp6v0c, Rap1a, R…	1619
GO:0050778	positive regulation of immune response	47	6	4.19	0.23653	0.23653	3dpi	BP	NonN_8	GO:0050778	B2m, Cacnb4, Cd81, Rap1a, Rps3, Stxbp1	144	Kcnb2, Rbfox3, Cdh18, Hs3st4, Grik1, Trhde, Dpp6, Sgcd, Pcdh10, Ntrk3, Slc8a3, Pcdh11x, Upp2, Meg3, Samd4, Cntnap2, Tmem132b, Mctp1, Jakmip2, Dner, Cacnb4, Kif26b, D430041D05Rik, Naaladl2, Sgcz, Brinp1, Xkr6, Atp8a2, Stxbp1, Dnajc6, Brinp3, Rps2, Diaph2, Igsf8, Rpsa, Plcl1, Ubc, Ifitm3, Epas1, Cobll1, Rps4x, Actb, Rpl3, Cfl1, Cdc42, Spock2, ENSMUSG00000040904, Rps29, Rps24, B2m, Atp6v0c, Rap1a, R…	1619
GO:0031400	negative regulation of protein modificat...	67	8	5.97	0.24204	0.24204	3dpi	BP	NonN_8	GO:0031400	Actb, Gstp1, Ntrk3, Ppia, Rpl11, Rpl23, Rps3, Slc8a3	144	Kcnb2, Rbfox3, Cdh18, Hs3st4, Grik1, Trhde, Dpp6, Sgcd, Pcdh10, Ntrk3, Slc8a3, Pcdh11x, Upp2, Meg3, Samd4, Cntnap2, Tmem132b, Mctp1, Jakmip2, Dner, Cacnb4, Kif26b, D430041D05Rik, Naaladl2, Sgcz, Brinp1, Xkr6, Atp8a2, Stxbp1, Dnajc6, Brinp3, Rps2, Diaph2, Igsf8, Rpsa, Plcl1, Ubc, Ifitm3, Epas1, Cobll1, Rps4x, Actb, Rpl3, Cfl1, Cdc42, Spock2, ENSMUSG00000040904, Rps29, Rps24, B2m, Atp6v0c, Rap1a, R…	1619
GO:0045859	regulation of protein kinase activity	67	8	5.97	0.24204	0.24204	3dpi	BP	NonN_8	GO:0045859	Actb, Gstp1, Hsp90ab1, Ntrk3, Ppia, Rap1a, Rps3, Slc8a3	144	Kcnb2, Rbfox3, Cdh18, Hs3st4, Grik1, Trhde, Dpp6, Sgcd, Pcdh10, Ntrk3, Slc8a3, Pcdh11x, Upp2, Meg3, Samd4, Cntnap2, Tmem132b, Mctp1, Jakmip2, Dner, Cacnb4, Kif26b, D430041D05Rik, Naaladl2, Sgcz, Brinp1, Xkr6, Atp8a2, Stxbp1, Dnajc6, Brinp3, Rps2, Diaph2, Igsf8, Rpsa, Plcl1, Ubc, Ifitm3, Epas1, Cobll1, Rps4x, Actb, Rpl3, Cfl1, Cdc42, Spock2, ENSMUSG00000040904, Rps29, Rps24, B2m, Atp6v0c, Rap1a, R…	1619
GO:0048609	multicellular organismal reproductive pr...	77	9	6.87	0.24232	0.24232	3dpi	BP	NonN_8	GO:0048609	Brinp1, Bsg, Diaph2, Gpx4, H3f3b, Ptgds, Ptn, Septin7, Ubb	144	Kcnb2, Rbfox3, Cdh18, Hs3st4, Grik1, Trhde, Dpp6, Sgcd, Pcdh10, Ntrk3, Slc8a3, Pcdh11x, Upp2, Meg3, Samd4, Cntnap2, Tmem132b, Mctp1, Jakmip2, Dner, Cacnb4, Kif26b, D430041D05Rik, Naaladl2, Sgcz, Brinp1, Xkr6, Atp8a2, Stxbp1, Dnajc6, Brinp3, Rps2, Diaph2, Igsf8, Rpsa, Plcl1, Ubc, Ifitm3, Epas1, Cobll1, Rps4x, Actb, Rpl3, Cfl1, Cdc42, Spock2, ENSMUSG00000040904, Rps29, Rps24, B2m, Atp6v0c, Rap1a, R…	1619
GO:0044092	negative regulation of molecular functio...	108	12	9.63	0.24865	0.24865	3dpi	BP	NonN_8	GO:0044092	Actb, Atp1a2, B2m, Calm1, Calm2, Cst3, Gstp1, Ndfip1, Ppia, Rpl11, Rpl23, Slc8a3	144	Kcnb2, Rbfox3, Cdh18, Hs3st4, Grik1, Trhde, Dpp6, Sgcd, Pcdh10, Ntrk3, Slc8a3, Pcdh11x, Upp2, Meg3, Samd4, Cntnap2, Tmem132b, Mctp1, Jakmip2, Dner, Cacnb4, Kif26b, D430041D05Rik, Naaladl2, Sgcz, Brinp1, Xkr6, Atp8a2, Stxbp1, Dnajc6, Brinp3, Rps2, Diaph2, Igsf8, Rpsa, Plcl1, Ubc, Ifitm3, Epas1, Cobll1, Rps4x, Actb, Rpl3, Cfl1, Cdc42, Spock2, ENSMUSG00000040904, Rps29, Rps24, B2m, Atp6v0c, Rap1a, R…	1619
GO:0022898	regulation of transmembrane transporter ...	58	7	5.17	0.25441	0.25441	3dpi	BP	NonN_8	GO:0022898	Actb, Atp1a2, Cacnb4, Calm1, Calm2, Cfl1, Ndufa4	144	Kcnb2, Rbfox3, Cdh18, Hs3st4, Grik1, Trhde, Dpp6, Sgcd, Pcdh10, Ntrk3, Slc8a3, Pcdh11x, Upp2, Meg3, Samd4, Cntnap2, Tmem132b, Mctp1, Jakmip2, Dner, Cacnb4, Kif26b, D430041D05Rik, Naaladl2, Sgcz, Brinp1, Xkr6, Atp8a2, Stxbp1, Dnajc6, Brinp3, Rps2, Diaph2, Igsf8, Rpsa, Plcl1, Ubc, Ifitm3, Epas1, Cobll1, Rps4x, Actb, Rpl3, Cfl1, Cdc42, Spock2, ENSMUSG00000040904, Rps29, Rps24, B2m, Atp6v0c, Rap1a, R…	1619
GO:0098542	defense response to other organism	58	7	5.17	0.25441	0.25441	3dpi	BP	NonN_8	GO:0098542	B2m, Cdc42, Fau, Ifitm3, Prdx1, Rpl30, Stxbp1	144	Kcnb2, Rbfox3, Cdh18, Hs3st4, Grik1, Trhde, Dpp6, Sgcd, Pcdh10, Ntrk3, Slc8a3, Pcdh11x, Upp2, Meg3, Samd4, Cntnap2, Tmem132b, Mctp1, Jakmip2, Dner, Cacnb4, Kif26b, D430041D05Rik, Naaladl2, Sgcz, Brinp1, Xkr6, Atp8a2, Stxbp1, Dnajc6, Brinp3, Rps2, Diaph2, Igsf8, Rpsa, Plcl1, Ubc, Ifitm3, Epas1, Cobll1, Rps4x, Actb, Rpl3, Cfl1, Cdc42, Spock2, ENSMUSG00000040904, Rps29, Rps24, B2m, Atp6v0c, Rap1a, R…	1619
GO:0008015	blood circulation	78	9	6.96	0.25443	0.25443	3dpi	BP	NonN_8	GO:0008015	Atp1a2, Atp5j, Calm1, Calm2, Cdc42, Epas1, Sgcd, Sgcz, Trhde	144	Kcnb2, Rbfox3, Cdh18, Hs3st4, Grik1, Trhde, Dpp6, Sgcd, Pcdh10, Ntrk3, Slc8a3, Pcdh11x, Upp2, Meg3, Samd4, Cntnap2, Tmem132b, Mctp1, Jakmip2, Dner, Cacnb4, Kif26b, D430041D05Rik, Naaladl2, Sgcz, Brinp1, Xkr6, Atp8a2, Stxbp1, Dnajc6, Brinp3, Rps2, Diaph2, Igsf8, Rpsa, Plcl1, Ubc, Ifitm3, Epas1, Cobll1, Rps4x, Actb, Rpl3, Cfl1, Cdc42, Spock2, ENSMUSG00000040904, Rps29, Rps24, B2m, Atp6v0c, Rap1a, R…	1619
GO:0032504	multicellular organism reproduction	78	9	6.96	0.25443	0.25443	3dpi	BP	NonN_8	GO:0032504	Brinp1, Bsg, Diaph2, Gpx4, H3f3b, Ptgds, Ptn, Septin7, Ubb	144	Kcnb2, Rbfox3, Cdh18, Hs3st4, Grik1, Trhde, Dpp6, Sgcd, Pcdh10, Ntrk3, Slc8a3, Pcdh11x, Upp2, Meg3, Samd4, Cntnap2, Tmem132b, Mctp1, Jakmip2, Dner, Cacnb4, Kif26b, D430041D05Rik, Naaladl2, Sgcz, Brinp1, Xkr6, Atp8a2, Stxbp1, Dnajc6, Brinp3, Rps2, Diaph2, Igsf8, Rpsa, Plcl1, Ubc, Ifitm3, Epas1, Cobll1, Rps4x, Actb, Rpl3, Cfl1, Cdc42, Spock2, ENSMUSG00000040904, Rps29, Rps24, B2m, Atp6v0c, Rap1a, R…	1619
GO:0033673	negative regulation of kinase activity	29	4	2.59	0.25534	0.25534	3dpi	BP	NonN_8	GO:0033673	Actb, Gstp1, Ppia, Slc8a3	144	Kcnb2, Rbfox3, Cdh18, Hs3st4, Grik1, Trhde, Dpp6, Sgcd, Pcdh10, Ntrk3, Slc8a3, Pcdh11x, Upp2, Meg3, Samd4, Cntnap2, Tmem132b, Mctp1, Jakmip2, Dner, Cacnb4, Kif26b, D430041D05Rik, Naaladl2, Sgcz, Brinp1, Xkr6, Atp8a2, Stxbp1, Dnajc6, Brinp3, Rps2, Diaph2, Igsf8, Rpsa, Plcl1, Ubc, Ifitm3, Epas1, Cobll1, Rps4x, Actb, Rpl3, Cfl1, Cdc42, Spock2, ENSMUSG00000040904, Rps29, Rps24, B2m, Atp6v0c, Rap1a, R…	1619
GO:0034504	protein localization to nucleus	29	4	2.59	0.25534	0.25534	3dpi	BP	NonN_8	GO:0034504	Cacnb4, Cfl1, Hsp90ab1, Rpl11	144	Kcnb2, Rbfox3, Cdh18, Hs3st4, Grik1, Trhde, Dpp6, Sgcd, Pcdh10, Ntrk3, Slc8a3, Pcdh11x, Upp2, Meg3, Samd4, Cntnap2, Tmem132b, Mctp1, Jakmip2, Dner, Cacnb4, Kif26b, D430041D05Rik, Naaladl2, Sgcz, Brinp1, Xkr6, Atp8a2, Stxbp1, Dnajc6, Brinp3, Rps2, Diaph2, Igsf8, Rpsa, Plcl1, Ubc, Ifitm3, Epas1, Cobll1, Rps4x, Actb, Rpl3, Cfl1, Cdc42, Spock2, ENSMUSG00000040904, Rps29, Rps24, B2m, Atp6v0c, Rap1a, R…	1619
GO:0050768	negative regulation of neurogenesis	29	4	2.59	0.25534	0.25534	3dpi	BP	NonN_8	GO:0050768	B2m, Brinp1, Ntrk3, Ptn	144	Kcnb2, Rbfox3, Cdh18, Hs3st4, Grik1, Trhde, Dpp6, Sgcd, Pcdh10, Ntrk3, Slc8a3, Pcdh11x, Upp2, Meg3, Samd4, Cntnap2, Tmem132b, Mctp1, Jakmip2, Dner, Cacnb4, Kif26b, D430041D05Rik, Naaladl2, Sgcz, Brinp1, Xkr6, Atp8a2, Stxbp1, Dnajc6, Brinp3, Rps2, Diaph2, Igsf8, Rpsa, Plcl1, Ubc, Ifitm3, Epas1, Cobll1, Rps4x, Actb, Rpl3, Cfl1, Cdc42, Spock2, ENSMUSG00000040904, Rps29, Rps24, B2m, Atp6v0c, Rap1a, R…	1619
GO:0051961	negative regulation of nervous system de...	29	4	2.59	0.25534	0.25534	3dpi	BP	NonN_8	GO:0051961	B2m, Brinp1, Ntrk3, Ptn	144	Kcnb2, Rbfox3, Cdh18, Hs3st4, Grik1, Trhde, Dpp6, Sgcd, Pcdh10, Ntrk3, Slc8a3, Pcdh11x, Upp2, Meg3, Samd4, Cntnap2, Tmem132b, Mctp1, Jakmip2, Dner, Cacnb4, Kif26b, D430041D05Rik, Naaladl2, Sgcz, Brinp1, Xkr6, Atp8a2, Stxbp1, Dnajc6, Brinp3, Rps2, Diaph2, Igsf8, Rpsa, Plcl1, Ubc, Ifitm3, Epas1, Cobll1, Rps4x, Actb, Rpl3, Cfl1, Cdc42, Spock2, ENSMUSG00000040904, Rps29, Rps24, B2m, Atp6v0c, Rap1a, R…	1619
GO:2001257	regulation of cation channel activity	29	4	2.59	0.25534	0.25534	3dpi	BP	NonN_8	GO:2001257	Cacnb4, Calm1, Calm2, Cfl1	144	Kcnb2, Rbfox3, Cdh18, Hs3st4, Grik1, Trhde, Dpp6, Sgcd, Pcdh10, Ntrk3, Slc8a3, Pcdh11x, Upp2, Meg3, Samd4, Cntnap2, Tmem132b, Mctp1, Jakmip2, Dner, Cacnb4, Kif26b, D430041D05Rik, Naaladl2, Sgcz, Brinp1, Xkr6, Atp8a2, Stxbp1, Dnajc6, Brinp3, Rps2, Diaph2, Igsf8, Rpsa, Plcl1, Ubc, Ifitm3, Epas1, Cobll1, Rps4x, Actb, Rpl3, Cfl1, Cdc42, Spock2, ENSMUSG00000040904, Rps29, Rps24, B2m, Atp6v0c, Rap1a, R…	1619
GO:0098609	cell-cell adhesion	119	13	10.61	0.25585	0.25585	3dpi	BP	NonN_8	GO:0098609	B2m, Bsg, Cd81, Cdc42, Cdh18, Gstp1, Kif26b, Ndfip1, Pcdh10, Ppia, Rps3, Rpsa, Stxbp1	144	Kcnb2, Rbfox3, Cdh18, Hs3st4, Grik1, Trhde, Dpp6, Sgcd, Pcdh10, Ntrk3, Slc8a3, Pcdh11x, Upp2, Meg3, Samd4, Cntnap2, Tmem132b, Mctp1, Jakmip2, Dner, Cacnb4, Kif26b, D430041D05Rik, Naaladl2, Sgcz, Brinp1, Xkr6, Atp8a2, Stxbp1, Dnajc6, Brinp3, Rps2, Diaph2, Igsf8, Rpsa, Plcl1, Ubc, Ifitm3, Epas1, Cobll1, Rps4x, Actb, Rpl3, Cfl1, Cdc42, Spock2, ENSMUSG00000040904, Rps29, Rps24, B2m, Atp6v0c, Rap1a, R…	1619
GO:0001909	leukocyte mediated cytotoxicity	11	2	0.98	0.25643	0.25643	3dpi	BP	NonN_8	GO:0001909	B2m, Prdx1	144	Kcnb2, Rbfox3, Cdh18, Hs3st4, Grik1, Trhde, Dpp6, Sgcd, Pcdh10, Ntrk3, Slc8a3, Pcdh11x, Upp2, Meg3, Samd4, Cntnap2, Tmem132b, Mctp1, Jakmip2, Dner, Cacnb4, Kif26b, D430041D05Rik, Naaladl2, Sgcz, Brinp1, Xkr6, Atp8a2, Stxbp1, Dnajc6, Brinp3, Rps2, Diaph2, Igsf8, Rpsa, Plcl1, Ubc, Ifitm3, Epas1, Cobll1, Rps4x, Actb, Rpl3, Cfl1, Cdc42, Spock2, ENSMUSG00000040904, Rps29, Rps24, B2m, Atp6v0c, Rap1a, R…	1619
GO:0002444	myeloid leukocyte mediated immunity	11	2	0.98	0.25643	0.25643	3dpi	BP	NonN_8	GO:0002444	Ptgds, Stxbp1	144	Kcnb2, Rbfox3, Cdh18, Hs3st4, Grik1, Trhde, Dpp6, Sgcd, Pcdh10, Ntrk3, Slc8a3, Pcdh11x, Upp2, Meg3, Samd4, Cntnap2, Tmem132b, Mctp1, Jakmip2, Dner, Cacnb4, Kif26b, D430041D05Rik, Naaladl2, Sgcz, Brinp1, Xkr6, Atp8a2, Stxbp1, Dnajc6, Brinp3, Rps2, Diaph2, Igsf8, Rpsa, Plcl1, Ubc, Ifitm3, Epas1, Cobll1, Rps4x, Actb, Rpl3, Cfl1, Cdc42, Spock2, ENSMUSG00000040904, Rps29, Rps24, B2m, Atp6v0c, Rap1a, R…	1619
GO:0002702	positive regulation of production of mol...	11	2	0.98	0.25643	0.25643	3dpi	BP	NonN_8	GO:0002702	B2m, Cd81	144	Kcnb2, Rbfox3, Cdh18, Hs3st4, Grik1, Trhde, Dpp6, Sgcd, Pcdh10, Ntrk3, Slc8a3, Pcdh11x, Upp2, Meg3, Samd4, Cntnap2, Tmem132b, Mctp1, Jakmip2, Dner, Cacnb4, Kif26b, D430041D05Rik, Naaladl2, Sgcz, Brinp1, Xkr6, Atp8a2, Stxbp1, Dnajc6, Brinp3, Rps2, Diaph2, Igsf8, Rpsa, Plcl1, Ubc, Ifitm3, Epas1, Cobll1, Rps4x, Actb, Rpl3, Cfl1, Cdc42, Spock2, ENSMUSG00000040904, Rps29, Rps24, B2m, Atp6v0c, Rap1a, R…	1619
GO:0002824	positive regulation of adaptive immune r...	11	2	0.98	0.25643	0.25643	3dpi	BP	NonN_8	GO:0002824	B2m, Cd81	144	Kcnb2, Rbfox3, Cdh18, Hs3st4, Grik1, Trhde, Dpp6, Sgcd, Pcdh10, Ntrk3, Slc8a3, Pcdh11x, Upp2, Meg3, Samd4, Cntnap2, Tmem132b, Mctp1, Jakmip2, Dner, Cacnb4, Kif26b, D430041D05Rik, Naaladl2, Sgcz, Brinp1, Xkr6, Atp8a2, Stxbp1, Dnajc6, Brinp3, Rps2, Diaph2, Igsf8, Rpsa, Plcl1, Ubc, Ifitm3, Epas1, Cobll1, Rps4x, Actb, Rpl3, Cfl1, Cdc42, Spock2, ENSMUSG00000040904, Rps29, Rps24, B2m, Atp6v0c, Rap1a, R…	1619
GO:0007632	visual behavior	11	2	0.98	0.25643	0.25643	3dpi	BP	NonN_8	GO:0007632	Atp1a2, Pde8b	144	Kcnb2, Rbfox3, Cdh18, Hs3st4, Grik1, Trhde, Dpp6, Sgcd, Pcdh10, Ntrk3, Slc8a3, Pcdh11x, Upp2, Meg3, Samd4, Cntnap2, Tmem132b, Mctp1, Jakmip2, Dner, Cacnb4, Kif26b, D430041D05Rik, Naaladl2, Sgcz, Brinp1, Xkr6, Atp8a2, Stxbp1, Dnajc6, Brinp3, Rps2, Diaph2, Igsf8, Rpsa, Plcl1, Ubc, Ifitm3, Epas1, Cobll1, Rps4x, Actb, Rpl3, Cfl1, Cdc42, Spock2, ENSMUSG00000040904, Rps29, Rps24, B2m, Atp6v0c, Rap1a, R…	1619
GO:0008542	visual learning	11	2	0.98	0.25643	0.25643	3dpi	BP	NonN_8	GO:0008542	Atp1a2, Pde8b	144	Kcnb2, Rbfox3, Cdh18, Hs3st4, Grik1, Trhde, Dpp6, Sgcd, Pcdh10, Ntrk3, Slc8a3, Pcdh11x, Upp2, Meg3, Samd4, Cntnap2, Tmem132b, Mctp1, Jakmip2, Dner, Cacnb4, Kif26b, D430041D05Rik, Naaladl2, Sgcz, Brinp1, Xkr6, Atp8a2, Stxbp1, Dnajc6, Brinp3, Rps2, Diaph2, Igsf8, Rpsa, Plcl1, Ubc, Ifitm3, Epas1, Cobll1, Rps4x, Actb, Rpl3, Cfl1, Cdc42, Spock2, ENSMUSG00000040904, Rps29, Rps24, B2m, Atp6v0c, Rap1a, R…	1619
GO:0014033	neural crest cell differentiation	11	2	0.98	0.25643	0.25643	3dpi	BP	NonN_8	GO:0014033	Cdc42, Cfl1	144	Kcnb2, Rbfox3, Cdh18, Hs3st4, Grik1, Trhde, Dpp6, Sgcd, Pcdh10, Ntrk3, Slc8a3, Pcdh11x, Upp2, Meg3, Samd4, Cntnap2, Tmem132b, Mctp1, Jakmip2, Dner, Cacnb4, Kif26b, D430041D05Rik, Naaladl2, Sgcz, Brinp1, Xkr6, Atp8a2, Stxbp1, Dnajc6, Brinp3, Rps2, Diaph2, Igsf8, Rpsa, Plcl1, Ubc, Ifitm3, Epas1, Cobll1, Rps4x, Actb, Rpl3, Cfl1, Cdc42, Spock2, ENSMUSG00000040904, Rps29, Rps24, B2m, Atp6v0c, Rap1a, R…	1619
GO:0031348	negative regulation of defense response	11	2	0.98	0.25643	0.25643	3dpi	BP	NonN_8	GO:0031348	Gstp1, Ndfip1	144	Kcnb2, Rbfox3, Cdh18, Hs3st4, Grik1, Trhde, Dpp6, Sgcd, Pcdh10, Ntrk3, Slc8a3, Pcdh11x, Upp2, Meg3, Samd4, Cntnap2, Tmem132b, Mctp1, Jakmip2, Dner, Cacnb4, Kif26b, D430041D05Rik, Naaladl2, Sgcz, Brinp1, Xkr6, Atp8a2, Stxbp1, Dnajc6, Brinp3, Rps2, Diaph2, Igsf8, Rpsa, Plcl1, Ubc, Ifitm3, Epas1, Cobll1, Rps4x, Actb, Rpl3, Cfl1, Cdc42, Spock2, ENSMUSG00000040904, Rps29, Rps24, B2m, Atp6v0c, Rap1a, R…	1619
GO:0032526	response to retinoic acid	11	2	0.98	0.25643	0.25643	3dpi	BP	NonN_8	GO:0032526	Brinp1, Brinp3	144	Kcnb2, Rbfox3, Cdh18, Hs3st4, Grik1, Trhde, Dpp6, Sgcd, Pcdh10, Ntrk3, Slc8a3, Pcdh11x, Upp2, Meg3, Samd4, Cntnap2, Tmem132b, Mctp1, Jakmip2, Dner, Cacnb4, Kif26b, D430041D05Rik, Naaladl2, Sgcz, Brinp1, Xkr6, Atp8a2, Stxbp1, Dnajc6, Brinp3, Rps2, Diaph2, Igsf8, Rpsa, Plcl1, Ubc, Ifitm3, Epas1, Cobll1, Rps4x, Actb, Rpl3, Cfl1, Cdc42, Spock2, ENSMUSG00000040904, Rps29, Rps24, B2m, Atp6v0c, Rap1a, R…	1619
GO:0034728	nucleosome organization	11	2	0.98	0.25643	0.25643	3dpi	BP	NonN_8	GO:0034728	H3f3b, Ptma	144	Kcnb2, Rbfox3, Cdh18, Hs3st4, Grik1, Trhde, Dpp6, Sgcd, Pcdh10, Ntrk3, Slc8a3, Pcdh11x, Upp2, Meg3, Samd4, Cntnap2, Tmem132b, Mctp1, Jakmip2, Dner, Cacnb4, Kif26b, D430041D05Rik, Naaladl2, Sgcz, Brinp1, Xkr6, Atp8a2, Stxbp1, Dnajc6, Brinp3, Rps2, Diaph2, Igsf8, Rpsa, Plcl1, Ubc, Ifitm3, Epas1, Cobll1, Rps4x, Actb, Rpl3, Cfl1, Cdc42, Spock2, ENSMUSG00000040904, Rps29, Rps24, B2m, Atp6v0c, Rap1a, R…	1619
GO:0035640	exploration behavior	11	2	0.98	0.25643	0.25643	3dpi	BP	NonN_8	GO:0035640	Atp1a2, Brinp1	144	Kcnb2, Rbfox3, Cdh18, Hs3st4, Grik1, Trhde, Dpp6, Sgcd, Pcdh10, Ntrk3, Slc8a3, Pcdh11x, Upp2, Meg3, Samd4, Cntnap2, Tmem132b, Mctp1, Jakmip2, Dner, Cacnb4, Kif26b, D430041D05Rik, Naaladl2, Sgcz, Brinp1, Xkr6, Atp8a2, Stxbp1, Dnajc6, Brinp3, Rps2, Diaph2, Igsf8, Rpsa, Plcl1, Ubc, Ifitm3, Epas1, Cobll1, Rps4x, Actb, Rpl3, Cfl1, Cdc42, Spock2, ENSMUSG00000040904, Rps29, Rps24, B2m, Atp6v0c, Rap1a, R…	1619
GO:0048864	stem cell development	11	2	0.98	0.25643	0.25643	3dpi	BP	NonN_8	GO:0048864	Cdc42, Cfl1	144	Kcnb2, Rbfox3, Cdh18, Hs3st4, Grik1, Trhde, Dpp6, Sgcd, Pcdh10, Ntrk3, Slc8a3, Pcdh11x, Upp2, Meg3, Samd4, Cntnap2, Tmem132b, Mctp1, Jakmip2, Dner, Cacnb4, Kif26b, D430041D05Rik, Naaladl2, Sgcz, Brinp1, Xkr6, Atp8a2, Stxbp1, Dnajc6, Brinp3, Rps2, Diaph2, Igsf8, Rpsa, Plcl1, Ubc, Ifitm3, Epas1, Cobll1, Rps4x, Actb, Rpl3, Cfl1, Cdc42, Spock2, ENSMUSG00000040904, Rps29, Rps24, B2m, Atp6v0c, Rap1a, R…	1619
GO:0051881	regulation of mitochondrial membrane pot...	11	2	0.98	0.25643	0.25643	3dpi	BP	NonN_8	GO:0051881	Ndufc2, Ubb	144	Kcnb2, Rbfox3, Cdh18, Hs3st4, Grik1, Trhde, Dpp6, Sgcd, Pcdh10, Ntrk3, Slc8a3, Pcdh11x, Upp2, Meg3, Samd4, Cntnap2, Tmem132b, Mctp1, Jakmip2, Dner, Cacnb4, Kif26b, D430041D05Rik, Naaladl2, Sgcz, Brinp1, Xkr6, Atp8a2, Stxbp1, Dnajc6, Brinp3, Rps2, Diaph2, Igsf8, Rpsa, Plcl1, Ubc, Ifitm3, Epas1, Cobll1, Rps4x, Actb, Rpl3, Cfl1, Cdc42, Spock2, ENSMUSG00000040904, Rps29, Rps24, B2m, Atp6v0c, Rap1a, R…	1619
GO:0051957	positive regulation of amino acid transp...	11	2	0.98	0.25643	0.25643	3dpi	BP	NonN_8	GO:0051957	Grik1, Stxbp1	144	Kcnb2, Rbfox3, Cdh18, Hs3st4, Grik1, Trhde, Dpp6, Sgcd, Pcdh10, Ntrk3, Slc8a3, Pcdh11x, Upp2, Meg3, Samd4, Cntnap2, Tmem132b, Mctp1, Jakmip2, Dner, Cacnb4, Kif26b, D430041D05Rik, Naaladl2, Sgcz, Brinp1, Xkr6, Atp8a2, Stxbp1, Dnajc6, Brinp3, Rps2, Diaph2, Igsf8, Rpsa, Plcl1, Ubc, Ifitm3, Epas1, Cobll1, Rps4x, Actb, Rpl3, Cfl1, Cdc42, Spock2, ENSMUSG00000040904, Rps29, Rps24, B2m, Atp6v0c, Rap1a, R…	1619
GO:0097062	dendritic spine maintenance	11	2	0.98	0.25643	0.25643	3dpi	BP	NonN_8	GO:0097062	Cfl1, Cntnap2	144	Kcnb2, Rbfox3, Cdh18, Hs3st4, Grik1, Trhde, Dpp6, Sgcd, Pcdh10, Ntrk3, Slc8a3, Pcdh11x, Upp2, Meg3, Samd4, Cntnap2, Tmem132b, Mctp1, Jakmip2, Dner, Cacnb4, Kif26b, D430041D05Rik, Naaladl2, Sgcz, Brinp1, Xkr6, Atp8a2, Stxbp1, Dnajc6, Brinp3, Rps2, Diaph2, Igsf8, Rpsa, Plcl1, Ubc, Ifitm3, Epas1, Cobll1, Rps4x, Actb, Rpl3, Cfl1, Cdc42, Spock2, ENSMUSG00000040904, Rps29, Rps24, B2m, Atp6v0c, Rap1a, R…	1619
GO:0099024	plasma membrane invagination	11	2	0.98	0.25643	0.25643	3dpi	BP	NonN_8	GO:0099024	Cdc42, Xkr6	144	Kcnb2, Rbfox3, Cdh18, Hs3st4, Grik1, Trhde, Dpp6, Sgcd, Pcdh10, Ntrk3, Slc8a3, Pcdh11x, Upp2, Meg3, Samd4, Cntnap2, Tmem132b, Mctp1, Jakmip2, Dner, Cacnb4, Kif26b, D430041D05Rik, Naaladl2, Sgcz, Brinp1, Xkr6, Atp8a2, Stxbp1, Dnajc6, Brinp3, Rps2, Diaph2, Igsf8, Rpsa, Plcl1, Ubc, Ifitm3, Epas1, Cobll1, Rps4x, Actb, Rpl3, Cfl1, Cdc42, Spock2, ENSMUSG00000040904, Rps29, Rps24, B2m, Atp6v0c, Rap1a, R…	1619
GO:1902743	regulation of lamellipodium organization	11	2	0.98	0.25643	0.25643	3dpi	BP	NonN_8	GO:1902743	Cdc42, Cfl1	144	Kcnb2, Rbfox3, Cdh18, Hs3st4, Grik1, Trhde, Dpp6, Sgcd, Pcdh10, Ntrk3, Slc8a3, Pcdh11x, Upp2, Meg3, Samd4, Cntnap2, Tmem132b, Mctp1, Jakmip2, Dner, Cacnb4, Kif26b, D430041D05Rik, Naaladl2, Sgcz, Brinp1, Xkr6, Atp8a2, Stxbp1, Dnajc6, Brinp3, Rps2, Diaph2, Igsf8, Rpsa, Plcl1, Ubc, Ifitm3, Epas1, Cobll1, Rps4x, Actb, Rpl3, Cfl1, Cdc42, Spock2, ENSMUSG00000040904, Rps29, Rps24, B2m, Atp6v0c, Rap1a, R…	1619
GO:1902745	positive regulation of lamellipodium org...	11	2	0.98	0.25643	0.25643	3dpi	BP	NonN_8	GO:1902745	Cdc42, Cfl1	144	Kcnb2, Rbfox3, Cdh18, Hs3st4, Grik1, Trhde, Dpp6, Sgcd, Pcdh10, Ntrk3, Slc8a3, Pcdh11x, Upp2, Meg3, Samd4, Cntnap2, Tmem132b, Mctp1, Jakmip2, Dner, Cacnb4, Kif26b, D430041D05Rik, Naaladl2, Sgcz, Brinp1, Xkr6, Atp8a2, Stxbp1, Dnajc6, Brinp3, Rps2, Diaph2, Igsf8, Rpsa, Plcl1, Ubc, Ifitm3, Epas1, Cobll1, Rps4x, Actb, Rpl3, Cfl1, Cdc42, Spock2, ENSMUSG00000040904, Rps29, Rps24, B2m, Atp6v0c, Rap1a, R…	1619
GO:1903036	positive regulation of response to wound...	11	2	0.98	0.25643	0.25643	3dpi	BP	NonN_8	GO:1903036	Ntrk3, Ptn	144	Kcnb2, Rbfox3, Cdh18, Hs3st4, Grik1, Trhde, Dpp6, Sgcd, Pcdh10, Ntrk3, Slc8a3, Pcdh11x, Upp2, Meg3, Samd4, Cntnap2, Tmem132b, Mctp1, Jakmip2, Dner, Cacnb4, Kif26b, D430041D05Rik, Naaladl2, Sgcz, Brinp1, Xkr6, Atp8a2, Stxbp1, Dnajc6, Brinp3, Rps2, Diaph2, Igsf8, Rpsa, Plcl1, Ubc, Ifitm3, Epas1, Cobll1, Rps4x, Actb, Rpl3, Cfl1, Cdc42, Spock2, ENSMUSG00000040904, Rps29, Rps24, B2m, Atp6v0c, Rap1a, R…	1619
GO:1903578	regulation of ATP metabolic process	11	2	0.98	0.25643	0.25643	3dpi	BP	NonN_8	GO:1903578	Cox7a2, Ndufc2	144	Kcnb2, Rbfox3, Cdh18, Hs3st4, Grik1, Trhde, Dpp6, Sgcd, Pcdh10, Ntrk3, Slc8a3, Pcdh11x, Upp2, Meg3, Samd4, Cntnap2, Tmem132b, Mctp1, Jakmip2, Dner, Cacnb4, Kif26b, D430041D05Rik, Naaladl2, Sgcz, Brinp1, Xkr6, Atp8a2, Stxbp1, Dnajc6, Brinp3, Rps2, Diaph2, Igsf8, Rpsa, Plcl1, Ubc, Ifitm3, Epas1, Cobll1, Rps4x, Actb, Rpl3, Cfl1, Cdc42, Spock2, ENSMUSG00000040904, Rps29, Rps24, B2m, Atp6v0c, Rap1a, R…	1619
GO:0051050	positive regulation of transport	161	17	14.36	0.25906	0.25906	3dpi	BP	NonN_8	GO:0051050	Atp8a2, B2m, Bsg, Cacnb4, Calm1, Calm2, Cd81, Cdc42, Cfl1, Dpp6, Grik1, Hsp90ab1, Ndufa4, Pltp, Ppia, Rap1a, Stxbp1	144	Kcnb2, Rbfox3, Cdh18, Hs3st4, Grik1, Trhde, Dpp6, Sgcd, Pcdh10, Ntrk3, Slc8a3, Pcdh11x, Upp2, Meg3, Samd4, Cntnap2, Tmem132b, Mctp1, Jakmip2, Dner, Cacnb4, Kif26b, D430041D05Rik, Naaladl2, Sgcz, Brinp1, Xkr6, Atp8a2, Stxbp1, Dnajc6, Brinp3, Rps2, Diaph2, Igsf8, Rpsa, Plcl1, Ubc, Ifitm3, Epas1, Cobll1, Rps4x, Actb, Rpl3, Cfl1, Cdc42, Spock2, ENSMUSG00000040904, Rps29, Rps24, B2m, Atp6v0c, Rap1a, R…	1619
GO:0032944	regulation of mononuclear cell prolifera...	20	3	1.78	0.26137	0.26137	3dpi	BP	NonN_8	GO:0032944	Cd81, Ndfip1, Rps3	144	Kcnb2, Rbfox3, Cdh18, Hs3st4, Grik1, Trhde, Dpp6, Sgcd, Pcdh10, Ntrk3, Slc8a3, Pcdh11x, Upp2, Meg3, Samd4, Cntnap2, Tmem132b, Mctp1, Jakmip2, Dner, Cacnb4, Kif26b, D430041D05Rik, Naaladl2, Sgcz, Brinp1, Xkr6, Atp8a2, Stxbp1, Dnajc6, Brinp3, Rps2, Diaph2, Igsf8, Rpsa, Plcl1, Ubc, Ifitm3, Epas1, Cobll1, Rps4x, Actb, Rpl3, Cfl1, Cdc42, Spock2, ENSMUSG00000040904, Rps29, Rps24, B2m, Atp6v0c, Rap1a, R…	1619
GO:0051091	positive regulation of DNA-binding trans...	20	3	1.78	0.26137	0.26137	3dpi	BP	NonN_8	GO:0051091	Ppia, Ptma, Rps3	144	Kcnb2, Rbfox3, Cdh18, Hs3st4, Grik1, Trhde, Dpp6, Sgcd, Pcdh10, Ntrk3, Slc8a3, Pcdh11x, Upp2, Meg3, Samd4, Cntnap2, Tmem132b, Mctp1, Jakmip2, Dner, Cacnb4, Kif26b, D430041D05Rik, Naaladl2, Sgcz, Brinp1, Xkr6, Atp8a2, Stxbp1, Dnajc6, Brinp3, Rps2, Diaph2, Igsf8, Rpsa, Plcl1, Ubc, Ifitm3, Epas1, Cobll1, Rps4x, Actb, Rpl3, Cfl1, Cdc42, Spock2, ENSMUSG00000040904, Rps29, Rps24, B2m, Atp6v0c, Rap1a, R…	1619
GO:0071456	cellular response to hypoxia	20	3	1.78	0.26137	0.26137	3dpi	BP	NonN_8	GO:0071456	Chchd2, Epas1, Slc8a3	144	Kcnb2, Rbfox3, Cdh18, Hs3st4, Grik1, Trhde, Dpp6, Sgcd, Pcdh10, Ntrk3, Slc8a3, Pcdh11x, Upp2, Meg3, Samd4, Cntnap2, Tmem132b, Mctp1, Jakmip2, Dner, Cacnb4, Kif26b, D430041D05Rik, Naaladl2, Sgcz, Brinp1, Xkr6, Atp8a2, Stxbp1, Dnajc6, Brinp3, Rps2, Diaph2, Igsf8, Rpsa, Plcl1, Ubc, Ifitm3, Epas1, Cobll1, Rps4x, Actb, Rpl3, Cfl1, Cdc42, Spock2, ENSMUSG00000040904, Rps29, Rps24, B2m, Atp6v0c, Rap1a, R…	1619
GO:0007612	learning	39	5	3.48	0.26389	0.26389	3dpi	BP	NonN_8	GO:0007612	Atp1a2, Cntnap2, Pde8b, Ptn, Slc8a3	144	Kcnb2, Rbfox3, Cdh18, Hs3st4, Grik1, Trhde, Dpp6, Sgcd, Pcdh10, Ntrk3, Slc8a3, Pcdh11x, Upp2, Meg3, Samd4, Cntnap2, Tmem132b, Mctp1, Jakmip2, Dner, Cacnb4, Kif26b, D430041D05Rik, Naaladl2, Sgcz, Brinp1, Xkr6, Atp8a2, Stxbp1, Dnajc6, Brinp3, Rps2, Diaph2, Igsf8, Rpsa, Plcl1, Ubc, Ifitm3, Epas1, Cobll1, Rps4x, Actb, Rpl3, Cfl1, Cdc42, Spock2, ENSMUSG00000040904, Rps29, Rps24, B2m, Atp6v0c, Rap1a, R…	1619
GO:0008016	regulation of heart contraction	39	5	3.48	0.26389	0.26389	3dpi	BP	NonN_8	GO:0008016	Atp1a2, Atp5j, Calm1, Calm2, Epas1	144	Kcnb2, Rbfox3, Cdh18, Hs3st4, Grik1, Trhde, Dpp6, Sgcd, Pcdh10, Ntrk3, Slc8a3, Pcdh11x, Upp2, Meg3, Samd4, Cntnap2, Tmem132b, Mctp1, Jakmip2, Dner, Cacnb4, Kif26b, D430041D05Rik, Naaladl2, Sgcz, Brinp1, Xkr6, Atp8a2, Stxbp1, Dnajc6, Brinp3, Rps2, Diaph2, Igsf8, Rpsa, Plcl1, Ubc, Ifitm3, Epas1, Cobll1, Rps4x, Actb, Rpl3, Cfl1, Cdc42, Spock2, ENSMUSG00000040904, Rps29, Rps24, B2m, Atp6v0c, Rap1a, R…	1619
GO:0009314	response to radiation	39	5	3.48	0.26389	0.26389	3dpi	BP	NonN_8	GO:0009314	Atp1a2, Atp8a2, Cacnb4, Cntnap2, Pde8b	144	Kcnb2, Rbfox3, Cdh18, Hs3st4, Grik1, Trhde, Dpp6, Sgcd, Pcdh10, Ntrk3, Slc8a3, Pcdh11x, Upp2, Meg3, Samd4, Cntnap2, Tmem132b, Mctp1, Jakmip2, Dner, Cacnb4, Kif26b, D430041D05Rik, Naaladl2, Sgcz, Brinp1, Xkr6, Atp8a2, Stxbp1, Dnajc6, Brinp3, Rps2, Diaph2, Igsf8, Rpsa, Plcl1, Ubc, Ifitm3, Epas1, Cobll1, Rps4x, Actb, Rpl3, Cfl1, Cdc42, Spock2, ENSMUSG00000040904, Rps29, Rps24, B2m, Atp6v0c, Rap1a, R…	1619
GO:0051222	positive regulation of protein transport	39	5	3.48	0.26389	0.26389	3dpi	BP	NonN_8	GO:0051222	Bsg, Cd81, Cdc42, Hsp90ab1, Ppia	144	Kcnb2, Rbfox3, Cdh18, Hs3st4, Grik1, Trhde, Dpp6, Sgcd, Pcdh10, Ntrk3, Slc8a3, Pcdh11x, Upp2, Meg3, Samd4, Cntnap2, Tmem132b, Mctp1, Jakmip2, Dner, Cacnb4, Kif26b, D430041D05Rik, Naaladl2, Sgcz, Brinp1, Xkr6, Atp8a2, Stxbp1, Dnajc6, Brinp3, Rps2, Diaph2, Igsf8, Rpsa, Plcl1, Ubc, Ifitm3, Epas1, Cobll1, Rps4x, Actb, Rpl3, Cfl1, Cdc42, Spock2, ENSMUSG00000040904, Rps29, Rps24, B2m, Atp6v0c, Rap1a, R…	1619
GO:1904951	positive regulation of establishment of ...	39	5	3.48	0.26389	0.26389	3dpi	BP	NonN_8	GO:1904951	Bsg, Cd81, Cdc42, Hsp90ab1, Ppia	144	Kcnb2, Rbfox3, Cdh18, Hs3st4, Grik1, Trhde, Dpp6, Sgcd, Pcdh10, Ntrk3, Slc8a3, Pcdh11x, Upp2, Meg3, Samd4, Cntnap2, Tmem132b, Mctp1, Jakmip2, Dner, Cacnb4, Kif26b, D430041D05Rik, Naaladl2, Sgcz, Brinp1, Xkr6, Atp8a2, Stxbp1, Dnajc6, Brinp3, Rps2, Diaph2, Igsf8, Rpsa, Plcl1, Ubc, Ifitm3, Epas1, Cobll1, Rps4x, Actb, Rpl3, Cfl1, Cdc42, Spock2, ENSMUSG00000040904, Rps29, Rps24, B2m, Atp6v0c, Rap1a, R…	1619
GO:2001233	regulation of apoptotic signaling pathwa...	39	5	3.48	0.26389	0.26389	3dpi	BP	NonN_8	GO:2001233	Gstp1, Ppia, Rpl11, Rps3, Ubb	144	Kcnb2, Rbfox3, Cdh18, Hs3st4, Grik1, Trhde, Dpp6, Sgcd, Pcdh10, Ntrk3, Slc8a3, Pcdh11x, Upp2, Meg3, Samd4, Cntnap2, Tmem132b, Mctp1, Jakmip2, Dner, Cacnb4, Kif26b, D430041D05Rik, Naaladl2, Sgcz, Brinp1, Xkr6, Atp8a2, Stxbp1, Dnajc6, Brinp3, Rps2, Diaph2, Igsf8, Rpsa, Plcl1, Ubc, Ifitm3, Epas1, Cobll1, Rps4x, Actb, Rpl3, Cfl1, Cdc42, Spock2, ENSMUSG00000040904, Rps29, Rps24, B2m, Atp6v0c, Rap1a, R…	1619
GO:0022407	regulation of cell-cell adhesion	49	6	4.37	0.26761	0.26761	3dpi	BP	NonN_8	GO:0022407	B2m, Cd81, Gstp1, Kif26b, Ndfip1, Rps3	144	Kcnb2, Rbfox3, Cdh18, Hs3st4, Grik1, Trhde, Dpp6, Sgcd, Pcdh10, Ntrk3, Slc8a3, Pcdh11x, Upp2, Meg3, Samd4, Cntnap2, Tmem132b, Mctp1, Jakmip2, Dner, Cacnb4, Kif26b, D430041D05Rik, Naaladl2, Sgcz, Brinp1, Xkr6, Atp8a2, Stxbp1, Dnajc6, Brinp3, Rps2, Diaph2, Igsf8, Rpsa, Plcl1, Ubc, Ifitm3, Epas1, Cobll1, Rps4x, Actb, Rpl3, Cfl1, Cdc42, Spock2, ENSMUSG00000040904, Rps29, Rps24, B2m, Atp6v0c, Rap1a, R…	1619
GO:0010035	response to inorganic substance	69	8	6.15	0.26822	0.26822	3dpi	BP	NonN_8	GO:0010035	B2m, Calm1, Calm2, Cfl1, Mt1, Prdx1, Rps3, Selenow	144	Kcnb2, Rbfox3, Cdh18, Hs3st4, Grik1, Trhde, Dpp6, Sgcd, Pcdh10, Ntrk3, Slc8a3, Pcdh11x, Upp2, Meg3, Samd4, Cntnap2, Tmem132b, Mctp1, Jakmip2, Dner, Cacnb4, Kif26b, D430041D05Rik, Naaladl2, Sgcz, Brinp1, Xkr6, Atp8a2, Stxbp1, Dnajc6, Brinp3, Rps2, Diaph2, Igsf8, Rpsa, Plcl1, Ubc, Ifitm3, Epas1, Cobll1, Rps4x, Actb, Rpl3, Cfl1, Cdc42, Spock2, ENSMUSG00000040904, Rps29, Rps24, B2m, Atp6v0c, Rap1a, R…	1619
GO:0097190	apoptotic signaling pathway	59	7	5.26	0.26871	0.26871	3dpi	BP	NonN_8	GO:0097190	Gstp1, Hint1, Itm2b, Ppia, Rpl11, Rps3, Ubb	144	Kcnb2, Rbfox3, Cdh18, Hs3st4, Grik1, Trhde, Dpp6, Sgcd, Pcdh10, Ntrk3, Slc8a3, Pcdh11x, Upp2, Meg3, Samd4, Cntnap2, Tmem132b, Mctp1, Jakmip2, Dner, Cacnb4, Kif26b, D430041D05Rik, Naaladl2, Sgcz, Brinp1, Xkr6, Atp8a2, Stxbp1, Dnajc6, Brinp3, Rps2, Diaph2, Igsf8, Rpsa, Plcl1, Ubc, Ifitm3, Epas1, Cobll1, Rps4x, Actb, Rpl3, Cfl1, Cdc42, Spock2, ENSMUSG00000040904, Rps29, Rps24, B2m, Atp6v0c, Rap1a, R…	1619
GO:0098662	inorganic cation transmembrane transport	100	11	8.92	0.27304	0.27304	3dpi	BP	NonN_8	GO:0098662	Atp1a2, Atp5j, Atp5j2, Atp6v0c, Cacnb4, Calm1, Calm2, Dpp6, Kcnb2, Ndufa4, Slc8a3	144	Kcnb2, Rbfox3, Cdh18, Hs3st4, Grik1, Trhde, Dpp6, Sgcd, Pcdh10, Ntrk3, Slc8a3, Pcdh11x, Upp2, Meg3, Samd4, Cntnap2, Tmem132b, Mctp1, Jakmip2, Dner, Cacnb4, Kif26b, D430041D05Rik, Naaladl2, Sgcz, Brinp1, Xkr6, Atp8a2, Stxbp1, Dnajc6, Brinp3, Rps2, Diaph2, Igsf8, Rpsa, Plcl1, Ubc, Ifitm3, Epas1, Cobll1, Rps4x, Actb, Rpl3, Cfl1, Cdc42, Spock2, ENSMUSG00000040904, Rps29, Rps24, B2m, Atp6v0c, Rap1a, R…	1619
GO:0098655	cation transmembrane transport	111	12	9.9	0.28021	0.28021	3dpi	BP	NonN_8	GO:0098655	Atp1a2, Atp5j, Atp5j2, Atp6v0c, Cacnb4, Calm1, Calm2, Cfl1, Dpp6, Kcnb2, Ndufa4, Slc8a3	144	Kcnb2, Rbfox3, Cdh18, Hs3st4, Grik1, Trhde, Dpp6, Sgcd, Pcdh10, Ntrk3, Slc8a3, Pcdh11x, Upp2, Meg3, Samd4, Cntnap2, Tmem132b, Mctp1, Jakmip2, Dner, Cacnb4, Kif26b, D430041D05Rik, Naaladl2, Sgcz, Brinp1, Xkr6, Atp8a2, Stxbp1, Dnajc6, Brinp3, Rps2, Diaph2, Igsf8, Rpsa, Plcl1, Ubc, Ifitm3, Epas1, Cobll1, Rps4x, Actb, Rpl3, Cfl1, Cdc42, Spock2, ENSMUSG00000040904, Rps29, Rps24, B2m, Atp6v0c, Rap1a, R…	1619
GO:0044770	cell cycle phase transition	40	5	3.57	0.28170	0.28170	3dpi	BP	NonN_8	GO:0044770	Cacnb4, Calm1, Calm2, Rpl17, Rpl24	144	Kcnb2, Rbfox3, Cdh18, Hs3st4, Grik1, Trhde, Dpp6, Sgcd, Pcdh10, Ntrk3, Slc8a3, Pcdh11x, Upp2, Meg3, Samd4, Cntnap2, Tmem132b, Mctp1, Jakmip2, Dner, Cacnb4, Kif26b, D430041D05Rik, Naaladl2, Sgcz, Brinp1, Xkr6, Atp8a2, Stxbp1, Dnajc6, Brinp3, Rps2, Diaph2, Igsf8, Rpsa, Plcl1, Ubc, Ifitm3, Epas1, Cobll1, Rps4x, Actb, Rpl3, Cfl1, Cdc42, Spock2, ENSMUSG00000040904, Rps29, Rps24, B2m, Atp6v0c, Rap1a, R…	1619
GO:0048872	homeostasis of number of cells	40	5	3.57	0.28170	0.28170	3dpi	BP	NonN_8	GO:0048872	B2m, Epas1, Prdx1, Rps14, Rps24	144	Kcnb2, Rbfox3, Cdh18, Hs3st4, Grik1, Trhde, Dpp6, Sgcd, Pcdh10, Ntrk3, Slc8a3, Pcdh11x, Upp2, Meg3, Samd4, Cntnap2, Tmem132b, Mctp1, Jakmip2, Dner, Cacnb4, Kif26b, D430041D05Rik, Naaladl2, Sgcz, Brinp1, Xkr6, Atp8a2, Stxbp1, Dnajc6, Brinp3, Rps2, Diaph2, Igsf8, Rpsa, Plcl1, Ubc, Ifitm3, Epas1, Cobll1, Rps4x, Actb, Rpl3, Cfl1, Cdc42, Spock2, ENSMUSG00000040904, Rps29, Rps24, B2m, Atp6v0c, Rap1a, R…	1619
GO:1905475	regulation of protein localization to me...	40	5	3.57	0.28170	0.28170	3dpi	BP	NonN_8	GO:1905475	Actb, Cd81, Dpp6, Ptn, Rap1a	144	Kcnb2, Rbfox3, Cdh18, Hs3st4, Grik1, Trhde, Dpp6, Sgcd, Pcdh10, Ntrk3, Slc8a3, Pcdh11x, Upp2, Meg3, Samd4, Cntnap2, Tmem132b, Mctp1, Jakmip2, Dner, Cacnb4, Kif26b, D430041D05Rik, Naaladl2, Sgcz, Brinp1, Xkr6, Atp8a2, Stxbp1, Dnajc6, Brinp3, Rps2, Diaph2, Igsf8, Rpsa, Plcl1, Ubc, Ifitm3, Epas1, Cobll1, Rps4x, Actb, Rpl3, Cfl1, Cdc42, Spock2, ENSMUSG00000040904, Rps29, Rps24, B2m, Atp6v0c, Rap1a, R…	1619
GO:0019941	modification-dependent protein catabolic...	60	7	5.35	0.28322	0.28322	3dpi	BP	NonN_8	GO:0019941	Hsp90ab1, Ndfip1, Rpl11, Rpl23, Rps27a, Ubb, Ubc	144	Kcnb2, Rbfox3, Cdh18, Hs3st4, Grik1, Trhde, Dpp6, Sgcd, Pcdh10, Ntrk3, Slc8a3, Pcdh11x, Upp2, Meg3, Samd4, Cntnap2, Tmem132b, Mctp1, Jakmip2, Dner, Cacnb4, Kif26b, D430041D05Rik, Naaladl2, Sgcz, Brinp1, Xkr6, Atp8a2, Stxbp1, Dnajc6, Brinp3, Rps2, Diaph2, Igsf8, Rpsa, Plcl1, Ubc, Ifitm3, Epas1, Cobll1, Rps4x, Actb, Rpl3, Cfl1, Cdc42, Spock2, ENSMUSG00000040904, Rps29, Rps24, B2m, Atp6v0c, Rap1a, R…	1619
GO:0043632	modification-dependent macromolecule cat...	60	7	5.35	0.28322	0.28322	3dpi	BP	NonN_8	GO:0043632	Hsp90ab1, Ndfip1, Rpl11, Rpl23, Rps27a, Ubb, Ubc	144	Kcnb2, Rbfox3, Cdh18, Hs3st4, Grik1, Trhde, Dpp6, Sgcd, Pcdh10, Ntrk3, Slc8a3, Pcdh11x, Upp2, Meg3, Samd4, Cntnap2, Tmem132b, Mctp1, Jakmip2, Dner, Cacnb4, Kif26b, D430041D05Rik, Naaladl2, Sgcz, Brinp1, Xkr6, Atp8a2, Stxbp1, Dnajc6, Brinp3, Rps2, Diaph2, Igsf8, Rpsa, Plcl1, Ubc, Ifitm3, Epas1, Cobll1, Rps4x, Actb, Rpl3, Cfl1, Cdc42, Spock2, ENSMUSG00000040904, Rps29, Rps24, B2m, Atp6v0c, Rap1a, R…	1619
GO:0099173	postsynapse organization	60	7	5.35	0.28322	0.28322	3dpi	BP	NonN_8	GO:0099173	Actb, Cdc42, Cfl1, Cntnap2, Ntrk3, Ptn, Septin7	144	Kcnb2, Rbfox3, Cdh18, Hs3st4, Grik1, Trhde, Dpp6, Sgcd, Pcdh10, Ntrk3, Slc8a3, Pcdh11x, Upp2, Meg3, Samd4, Cntnap2, Tmem132b, Mctp1, Jakmip2, Dner, Cacnb4, Kif26b, D430041D05Rik, Naaladl2, Sgcz, Brinp1, Xkr6, Atp8a2, Stxbp1, Dnajc6, Brinp3, Rps2, Diaph2, Igsf8, Rpsa, Plcl1, Ubc, Ifitm3, Epas1, Cobll1, Rps4x, Actb, Rpl3, Cfl1, Cdc42, Spock2, ENSMUSG00000040904, Rps29, Rps24, B2m, Atp6v0c, Rap1a, R…	1619
GO:0001654	eye development	50	6	4.46	0.28354	0.28354	3dpi	BP	NonN_8	GO:0001654	Atp8a2, Bsg, Ntrk3, Pfdn5, Ptn, Rpl24	144	Kcnb2, Rbfox3, Cdh18, Hs3st4, Grik1, Trhde, Dpp6, Sgcd, Pcdh10, Ntrk3, Slc8a3, Pcdh11x, Upp2, Meg3, Samd4, Cntnap2, Tmem132b, Mctp1, Jakmip2, Dner, Cacnb4, Kif26b, D430041D05Rik, Naaladl2, Sgcz, Brinp1, Xkr6, Atp8a2, Stxbp1, Dnajc6, Brinp3, Rps2, Diaph2, Igsf8, Rpsa, Plcl1, Ubc, Ifitm3, Epas1, Cobll1, Rps4x, Actb, Rpl3, Cfl1, Cdc42, Spock2, ENSMUSG00000040904, Rps29, Rps24, B2m, Atp6v0c, Rap1a, R…	1619
GO:0055082	cellular chemical homeostasis	101	11	9.01	0.28428	0.28428	3dpi	BP	NonN_8	GO:0055082	Atp1a2, Atp6v0c, Cacnb4, Calm1, Calm2, Ckb, Ftl1, Mt1, Ndfip1, Pde8b, Slc8a3	144	Kcnb2, Rbfox3, Cdh18, Hs3st4, Grik1, Trhde, Dpp6, Sgcd, Pcdh10, Ntrk3, Slc8a3, Pcdh11x, Upp2, Meg3, Samd4, Cntnap2, Tmem132b, Mctp1, Jakmip2, Dner, Cacnb4, Kif26b, D430041D05Rik, Naaladl2, Sgcz, Brinp1, Xkr6, Atp8a2, Stxbp1, Dnajc6, Brinp3, Rps2, Diaph2, Igsf8, Rpsa, Plcl1, Ubc, Ifitm3, Epas1, Cobll1, Rps4x, Actb, Rpl3, Cfl1, Cdc42, Spock2, ENSMUSG00000040904, Rps29, Rps24, B2m, Atp6v0c, Rap1a, R…	1619
GO:0036294	cellular response to decreased oxygen le...	21	3	1.87	0.28658	0.28658	3dpi	BP	NonN_8	GO:0036294	Chchd2, Epas1, Slc8a3	144	Kcnb2, Rbfox3, Cdh18, Hs3st4, Grik1, Trhde, Dpp6, Sgcd, Pcdh10, Ntrk3, Slc8a3, Pcdh11x, Upp2, Meg3, Samd4, Cntnap2, Tmem132b, Mctp1, Jakmip2, Dner, Cacnb4, Kif26b, D430041D05Rik, Naaladl2, Sgcz, Brinp1, Xkr6, Atp8a2, Stxbp1, Dnajc6, Brinp3, Rps2, Diaph2, Igsf8, Rpsa, Plcl1, Ubc, Ifitm3, Epas1, Cobll1, Rps4x, Actb, Rpl3, Cfl1, Cdc42, Spock2, ENSMUSG00000040904, Rps29, Rps24, B2m, Atp6v0c, Rap1a, R…	1619
GO:0042098	T cell proliferation	21	3	1.87	0.28658	0.28658	3dpi	BP	NonN_8	GO:0042098	Cd81, Ndfip1, Rps3	144	Kcnb2, Rbfox3, Cdh18, Hs3st4, Grik1, Trhde, Dpp6, Sgcd, Pcdh10, Ntrk3, Slc8a3, Pcdh11x, Upp2, Meg3, Samd4, Cntnap2, Tmem132b, Mctp1, Jakmip2, Dner, Cacnb4, Kif26b, D430041D05Rik, Naaladl2, Sgcz, Brinp1, Xkr6, Atp8a2, Stxbp1, Dnajc6, Brinp3, Rps2, Diaph2, Igsf8, Rpsa, Plcl1, Ubc, Ifitm3, Epas1, Cobll1, Rps4x, Actb, Rpl3, Cfl1, Cdc42, Spock2, ENSMUSG00000040904, Rps29, Rps24, B2m, Atp6v0c, Rap1a, R…	1619
GO:0050851	antigen receptor-mediated signaling path...	21	3	1.87	0.28658	0.28658	3dpi	BP	NonN_8	GO:0050851	Cacnb4, Cd81, Rps3	144	Kcnb2, Rbfox3, Cdh18, Hs3st4, Grik1, Trhde, Dpp6, Sgcd, Pcdh10, Ntrk3, Slc8a3, Pcdh11x, Upp2, Meg3, Samd4, Cntnap2, Tmem132b, Mctp1, Jakmip2, Dner, Cacnb4, Kif26b, D430041D05Rik, Naaladl2, Sgcz, Brinp1, Xkr6, Atp8a2, Stxbp1, Dnajc6, Brinp3, Rps2, Diaph2, Igsf8, Rpsa, Plcl1, Ubc, Ifitm3, Epas1, Cobll1, Rps4x, Actb, Rpl3, Cfl1, Cdc42, Spock2, ENSMUSG00000040904, Rps29, Rps24, B2m, Atp6v0c, Rap1a, R…	1619
GO:0050870	positive regulation of T cell activation	21	3	1.87	0.28658	0.28658	3dpi	BP	NonN_8	GO:0050870	B2m, Cd81, Rps3	144	Kcnb2, Rbfox3, Cdh18, Hs3st4, Grik1, Trhde, Dpp6, Sgcd, Pcdh10, Ntrk3, Slc8a3, Pcdh11x, Upp2, Meg3, Samd4, Cntnap2, Tmem132b, Mctp1, Jakmip2, Dner, Cacnb4, Kif26b, D430041D05Rik, Naaladl2, Sgcz, Brinp1, Xkr6, Atp8a2, Stxbp1, Dnajc6, Brinp3, Rps2, Diaph2, Igsf8, Rpsa, Plcl1, Ubc, Ifitm3, Epas1, Cobll1, Rps4x, Actb, Rpl3, Cfl1, Cdc42, Spock2, ENSMUSG00000040904, Rps29, Rps24, B2m, Atp6v0c, Rap1a, R…	1619
GO:0055117	regulation of cardiac muscle contraction	21	3	1.87	0.28658	0.28658	3dpi	BP	NonN_8	GO:0055117	Atp1a2, Calm1, Calm2	144	Kcnb2, Rbfox3, Cdh18, Hs3st4, Grik1, Trhde, Dpp6, Sgcd, Pcdh10, Ntrk3, Slc8a3, Pcdh11x, Upp2, Meg3, Samd4, Cntnap2, Tmem132b, Mctp1, Jakmip2, Dner, Cacnb4, Kif26b, D430041D05Rik, Naaladl2, Sgcz, Brinp1, Xkr6, Atp8a2, Stxbp1, Dnajc6, Brinp3, Rps2, Diaph2, Igsf8, Rpsa, Plcl1, Ubc, Ifitm3, Epas1, Cobll1, Rps4x, Actb, Rpl3, Cfl1, Cdc42, Spock2, ENSMUSG00000040904, Rps29, Rps24, B2m, Atp6v0c, Rap1a, R…	1619
GO:0061136	regulation of proteasomal protein catabo...	21	3	1.87	0.28658	0.28658	3dpi	BP	NonN_8	GO:0061136	Hsp90ab1, Rpl11, Ubb	144	Kcnb2, Rbfox3, Cdh18, Hs3st4, Grik1, Trhde, Dpp6, Sgcd, Pcdh10, Ntrk3, Slc8a3, Pcdh11x, Upp2, Meg3, Samd4, Cntnap2, Tmem132b, Mctp1, Jakmip2, Dner, Cacnb4, Kif26b, D430041D05Rik, Naaladl2, Sgcz, Brinp1, Xkr6, Atp8a2, Stxbp1, Dnajc6, Brinp3, Rps2, Diaph2, Igsf8, Rpsa, Plcl1, Ubc, Ifitm3, Epas1, Cobll1, Rps4x, Actb, Rpl3, Cfl1, Cdc42, Spock2, ENSMUSG00000040904, Rps29, Rps24, B2m, Atp6v0c, Rap1a, R…	1619
GO:1903039	positive regulation of leukocyte cell-ce...	21	3	1.87	0.28658	0.28658	3dpi	BP	NonN_8	GO:1903039	B2m, Cd81, Rps3	144	Kcnb2, Rbfox3, Cdh18, Hs3st4, Grik1, Trhde, Dpp6, Sgcd, Pcdh10, Ntrk3, Slc8a3, Pcdh11x, Upp2, Meg3, Samd4, Cntnap2, Tmem132b, Mctp1, Jakmip2, Dner, Cacnb4, Kif26b, D430041D05Rik, Naaladl2, Sgcz, Brinp1, Xkr6, Atp8a2, Stxbp1, Dnajc6, Brinp3, Rps2, Diaph2, Igsf8, Rpsa, Plcl1, Ubc, Ifitm3, Epas1, Cobll1, Rps4x, Actb, Rpl3, Cfl1, Cdc42, Spock2, ENSMUSG00000040904, Rps29, Rps24, B2m, Atp6v0c, Rap1a, R…	1619
GO:2000058	regulation of ubiquitin-dependent protei...	21	3	1.87	0.28658	0.28658	3dpi	BP	NonN_8	GO:2000058	Hsp90ab1, Rpl11, Rpl23	144	Kcnb2, Rbfox3, Cdh18, Hs3st4, Grik1, Trhde, Dpp6, Sgcd, Pcdh10, Ntrk3, Slc8a3, Pcdh11x, Upp2, Meg3, Samd4, Cntnap2, Tmem132b, Mctp1, Jakmip2, Dner, Cacnb4, Kif26b, D430041D05Rik, Naaladl2, Sgcz, Brinp1, Xkr6, Atp8a2, Stxbp1, Dnajc6, Brinp3, Rps2, Diaph2, Igsf8, Rpsa, Plcl1, Ubc, Ifitm3, Epas1, Cobll1, Rps4x, Actb, Rpl3, Cfl1, Cdc42, Spock2, ENSMUSG00000040904, Rps29, Rps24, B2m, Atp6v0c, Rap1a, R…	1619
GO:0043207	response to external biotic stimulus	91	10	8.11	0.28820	0.28820	3dpi	BP	NonN_8	GO:0043207	B2m, Cdc42, Fau, Gstp1, Ifitm3, Naaladl2, Prdx1, Rpl30, Rps15a, Stxbp1	144	Kcnb2, Rbfox3, Cdh18, Hs3st4, Grik1, Trhde, Dpp6, Sgcd, Pcdh10, Ntrk3, Slc8a3, Pcdh11x, Upp2, Meg3, Samd4, Cntnap2, Tmem132b, Mctp1, Jakmip2, Dner, Cacnb4, Kif26b, D430041D05Rik, Naaladl2, Sgcz, Brinp1, Xkr6, Atp8a2, Stxbp1, Dnajc6, Brinp3, Rps2, Diaph2, Igsf8, Rpsa, Plcl1, Ubc, Ifitm3, Epas1, Cobll1, Rps4x, Actb, Rpl3, Cfl1, Cdc42, Spock2, ENSMUSG00000040904, Rps29, Rps24, B2m, Atp6v0c, Rap1a, R…	1619
GO:0051707	response to other organism	91	10	8.11	0.28820	0.28820	3dpi	BP	NonN_8	GO:0051707	B2m, Cdc42, Fau, Gstp1, Ifitm3, Naaladl2, Prdx1, Rpl30, Rps15a, Stxbp1	144	Kcnb2, Rbfox3, Cdh18, Hs3st4, Grik1, Trhde, Dpp6, Sgcd, Pcdh10, Ntrk3, Slc8a3, Pcdh11x, Upp2, Meg3, Samd4, Cntnap2, Tmem132b, Mctp1, Jakmip2, Dner, Cacnb4, Kif26b, D430041D05Rik, Naaladl2, Sgcz, Brinp1, Xkr6, Atp8a2, Stxbp1, Dnajc6, Brinp3, Rps2, Diaph2, Igsf8, Rpsa, Plcl1, Ubc, Ifitm3, Epas1, Cobll1, Rps4x, Actb, Rpl3, Cfl1, Cdc42, Spock2, ENSMUSG00000040904, Rps29, Rps24, B2m, Atp6v0c, Rap1a, R…	1619
GO:0072657	protein localization to membrane	91	10	8.11	0.28820	0.28820	3dpi	BP	NonN_8	GO:0072657	Actb, Bsg, Calm1, Cd81, Dpp6, Kcnb2, Ptn, Rap1a, Sec62, Stxbp1	144	Kcnb2, Rbfox3, Cdh18, Hs3st4, Grik1, Trhde, Dpp6, Sgcd, Pcdh10, Ntrk3, Slc8a3, Pcdh11x, Upp2, Meg3, Samd4, Cntnap2, Tmem132b, Mctp1, Jakmip2, Dner, Cacnb4, Kif26b, D430041D05Rik, Naaladl2, Sgcz, Brinp1, Xkr6, Atp8a2, Stxbp1, Dnajc6, Brinp3, Rps2, Diaph2, Igsf8, Rpsa, Plcl1, Ubc, Ifitm3, Epas1, Cobll1, Rps4x, Actb, Rpl3, Cfl1, Cdc42, Spock2, ENSMUSG00000040904, Rps29, Rps24, B2m, Atp6v0c, Rap1a, R…	1619
GO:0002708	positive regulation of lymphocyte mediat...	12	2	1.07	0.29093	0.29093	3dpi	BP	NonN_8	GO:0002708	B2m, Cd81	144	Kcnb2, Rbfox3, Cdh18, Hs3st4, Grik1, Trhde, Dpp6, Sgcd, Pcdh10, Ntrk3, Slc8a3, Pcdh11x, Upp2, Meg3, Samd4, Cntnap2, Tmem132b, Mctp1, Jakmip2, Dner, Cacnb4, Kif26b, D430041D05Rik, Naaladl2, Sgcz, Brinp1, Xkr6, Atp8a2, Stxbp1, Dnajc6, Brinp3, Rps2, Diaph2, Igsf8, Rpsa, Plcl1, Ubc, Ifitm3, Epas1, Cobll1, Rps4x, Actb, Rpl3, Cfl1, Cdc42, Spock2, ENSMUSG00000040904, Rps29, Rps24, B2m, Atp6v0c, Rap1a, R…	1619
GO:0002821	positive regulation of adaptive immune r...	12	2	1.07	0.29093	0.29093	3dpi	BP	NonN_8	GO:0002821	B2m, Cd81	144	Kcnb2, Rbfox3, Cdh18, Hs3st4, Grik1, Trhde, Dpp6, Sgcd, Pcdh10, Ntrk3, Slc8a3, Pcdh11x, Upp2, Meg3, Samd4, Cntnap2, Tmem132b, Mctp1, Jakmip2, Dner, Cacnb4, Kif26b, D430041D05Rik, Naaladl2, Sgcz, Brinp1, Xkr6, Atp8a2, Stxbp1, Dnajc6, Brinp3, Rps2, Diaph2, Igsf8, Rpsa, Plcl1, Ubc, Ifitm3, Epas1, Cobll1, Rps4x, Actb, Rpl3, Cfl1, Cdc42, Spock2, ENSMUSG00000040904, Rps29, Rps24, B2m, Atp6v0c, Rap1a, R…	1619
GO:0007622	rhythmic behavior	12	2	1.07	0.29093	0.29093	3dpi	BP	NonN_8	GO:0007622	Cntnap2, Ptgds	144	Kcnb2, Rbfox3, Cdh18, Hs3st4, Grik1, Trhde, Dpp6, Sgcd, Pcdh10, Ntrk3, Slc8a3, Pcdh11x, Upp2, Meg3, Samd4, Cntnap2, Tmem132b, Mctp1, Jakmip2, Dner, Cacnb4, Kif26b, D430041D05Rik, Naaladl2, Sgcz, Brinp1, Xkr6, Atp8a2, Stxbp1, Dnajc6, Brinp3, Rps2, Diaph2, Igsf8, Rpsa, Plcl1, Ubc, Ifitm3, Epas1, Cobll1, Rps4x, Actb, Rpl3, Cfl1, Cdc42, Spock2, ENSMUSG00000040904, Rps29, Rps24, B2m, Atp6v0c, Rap1a, R…	1619
GO:0014014	negative regulation of gliogenesis	12	2	1.07	0.29093	0.29093	3dpi	BP	NonN_8	GO:0014014	Ntrk3, Ptn	144	Kcnb2, Rbfox3, Cdh18, Hs3st4, Grik1, Trhde, Dpp6, Sgcd, Pcdh10, Ntrk3, Slc8a3, Pcdh11x, Upp2, Meg3, Samd4, Cntnap2, Tmem132b, Mctp1, Jakmip2, Dner, Cacnb4, Kif26b, D430041D05Rik, Naaladl2, Sgcz, Brinp1, Xkr6, Atp8a2, Stxbp1, Dnajc6, Brinp3, Rps2, Diaph2, Igsf8, Rpsa, Plcl1, Ubc, Ifitm3, Epas1, Cobll1, Rps4x, Actb, Rpl3, Cfl1, Cdc42, Spock2, ENSMUSG00000040904, Rps29, Rps24, B2m, Atp6v0c, Rap1a, R…	1619
GO:0019218	regulation of steroid metabolic process	12	2	1.07	0.29093	0.29093	3dpi	BP	NonN_8	GO:0019218	Igfbp7, Pde8b	144	Kcnb2, Rbfox3, Cdh18, Hs3st4, Grik1, Trhde, Dpp6, Sgcd, Pcdh10, Ntrk3, Slc8a3, Pcdh11x, Upp2, Meg3, Samd4, Cntnap2, Tmem132b, Mctp1, Jakmip2, Dner, Cacnb4, Kif26b, D430041D05Rik, Naaladl2, Sgcz, Brinp1, Xkr6, Atp8a2, Stxbp1, Dnajc6, Brinp3, Rps2, Diaph2, Igsf8, Rpsa, Plcl1, Ubc, Ifitm3, Epas1, Cobll1, Rps4x, Actb, Rpl3, Cfl1, Cdc42, Spock2, ENSMUSG00000040904, Rps29, Rps24, B2m, Atp6v0c, Rap1a, R…	1619
GO:0019228	neuronal action potential	12	2	1.07	0.29093	0.29093	3dpi	BP	NonN_8	GO:0019228	Cntnap2, Dpp6	144	Kcnb2, Rbfox3, Cdh18, Hs3st4, Grik1, Trhde, Dpp6, Sgcd, Pcdh10, Ntrk3, Slc8a3, Pcdh11x, Upp2, Meg3, Samd4, Cntnap2, Tmem132b, Mctp1, Jakmip2, Dner, Cacnb4, Kif26b, D430041D05Rik, Naaladl2, Sgcz, Brinp1, Xkr6, Atp8a2, Stxbp1, Dnajc6, Brinp3, Rps2, Diaph2, Igsf8, Rpsa, Plcl1, Ubc, Ifitm3, Epas1, Cobll1, Rps4x, Actb, Rpl3, Cfl1, Cdc42, Spock2, ENSMUSG00000040904, Rps29, Rps24, B2m, Atp6v0c, Rap1a, R…	1619
GO:0021680	cerebellar Purkinje cell layer developme...	12	2	1.07	0.29093	0.29093	3dpi	BP	NonN_8	GO:0021680	Cntnap2, Uqcrq	144	Kcnb2, Rbfox3, Cdh18, Hs3st4, Grik1, Trhde, Dpp6, Sgcd, Pcdh10, Ntrk3, Slc8a3, Pcdh11x, Upp2, Meg3, Samd4, Cntnap2, Tmem132b, Mctp1, Jakmip2, Dner, Cacnb4, Kif26b, D430041D05Rik, Naaladl2, Sgcz, Brinp1, Xkr6, Atp8a2, Stxbp1, Dnajc6, Brinp3, Rps2, Diaph2, Igsf8, Rpsa, Plcl1, Ubc, Ifitm3, Epas1, Cobll1, Rps4x, Actb, Rpl3, Cfl1, Cdc42, Spock2, ENSMUSG00000040904, Rps29, Rps24, B2m, Atp6v0c, Rap1a, R…	1619
GO:0030593	neutrophil chemotaxis	12	2	1.07	0.29093	0.29093	3dpi	BP	NonN_8	GO:0030593	Bsg, Ppia	144	Kcnb2, Rbfox3, Cdh18, Hs3st4, Grik1, Trhde, Dpp6, Sgcd, Pcdh10, Ntrk3, Slc8a3, Pcdh11x, Upp2, Meg3, Samd4, Cntnap2, Tmem132b, Mctp1, Jakmip2, Dner, Cacnb4, Kif26b, D430041D05Rik, Naaladl2, Sgcz, Brinp1, Xkr6, Atp8a2, Stxbp1, Dnajc6, Brinp3, Rps2, Diaph2, Igsf8, Rpsa, Plcl1, Ubc, Ifitm3, Epas1, Cobll1, Rps4x, Actb, Rpl3, Cfl1, Cdc42, Spock2, ENSMUSG00000040904, Rps29, Rps24, B2m, Atp6v0c, Rap1a, R…	1619
GO:0031341	regulation of cell killing	12	2	1.07	0.29093	0.29093	3dpi	BP	NonN_8	GO:0031341	B2m, Hsp90ab1	144	Kcnb2, Rbfox3, Cdh18, Hs3st4, Grik1, Trhde, Dpp6, Sgcd, Pcdh10, Ntrk3, Slc8a3, Pcdh11x, Upp2, Meg3, Samd4, Cntnap2, Tmem132b, Mctp1, Jakmip2, Dner, Cacnb4, Kif26b, D430041D05Rik, Naaladl2, Sgcz, Brinp1, Xkr6, Atp8a2, Stxbp1, Dnajc6, Brinp3, Rps2, Diaph2, Igsf8, Rpsa, Plcl1, Ubc, Ifitm3, Epas1, Cobll1, Rps4x, Actb, Rpl3, Cfl1, Cdc42, Spock2, ENSMUSG00000040904, Rps29, Rps24, B2m, Atp6v0c, Rap1a, R…	1619
GO:0048512	circadian behavior	12	2	1.07	0.29093	0.29093	3dpi	BP	NonN_8	GO:0048512	Cntnap2, Ptgds	144	Kcnb2, Rbfox3, Cdh18, Hs3st4, Grik1, Trhde, Dpp6, Sgcd, Pcdh10, Ntrk3, Slc8a3, Pcdh11x, Upp2, Meg3, Samd4, Cntnap2, Tmem132b, Mctp1, Jakmip2, Dner, Cacnb4, Kif26b, D430041D05Rik, Naaladl2, Sgcz, Brinp1, Xkr6, Atp8a2, Stxbp1, Dnajc6, Brinp3, Rps2, Diaph2, Igsf8, Rpsa, Plcl1, Ubc, Ifitm3, Epas1, Cobll1, Rps4x, Actb, Rpl3, Cfl1, Cdc42, Spock2, ENSMUSG00000040904, Rps29, Rps24, B2m, Atp6v0c, Rap1a, R…	1619
GO:0050848	regulation of calcium-mediated signaling	12	2	1.07	0.29093	0.29093	3dpi	BP	NonN_8	GO:0050848	Calm2, Hint1	144	Kcnb2, Rbfox3, Cdh18, Hs3st4, Grik1, Trhde, Dpp6, Sgcd, Pcdh10, Ntrk3, Slc8a3, Pcdh11x, Upp2, Meg3, Samd4, Cntnap2, Tmem132b, Mctp1, Jakmip2, Dner, Cacnb4, Kif26b, D430041D05Rik, Naaladl2, Sgcz, Brinp1, Xkr6, Atp8a2, Stxbp1, Dnajc6, Brinp3, Rps2, Diaph2, Igsf8, Rpsa, Plcl1, Ubc, Ifitm3, Epas1, Cobll1, Rps4x, Actb, Rpl3, Cfl1, Cdc42, Spock2, ENSMUSG00000040904, Rps29, Rps24, B2m, Atp6v0c, Rap1a, R…	1619
GO:0050906	detection of stimulus involved in sensor...	12	2	1.07	0.29093	0.29093	3dpi	BP	NonN_8	GO:0050906	Atp8a2, Cacnb4	144	Kcnb2, Rbfox3, Cdh18, Hs3st4, Grik1, Trhde, Dpp6, Sgcd, Pcdh10, Ntrk3, Slc8a3, Pcdh11x, Upp2, Meg3, Samd4, Cntnap2, Tmem132b, Mctp1, Jakmip2, Dner, Cacnb4, Kif26b, D430041D05Rik, Naaladl2, Sgcz, Brinp1, Xkr6, Atp8a2, Stxbp1, Dnajc6, Brinp3, Rps2, Diaph2, Igsf8, Rpsa, Plcl1, Ubc, Ifitm3, Epas1, Cobll1, Rps4x, Actb, Rpl3, Cfl1, Cdc42, Spock2, ENSMUSG00000040904, Rps29, Rps24, B2m, Atp6v0c, Rap1a, R…	1619
GO:0051591	response to cAMP	12	2	1.07	0.29093	0.29093	3dpi	BP	NonN_8	GO:0051591	Rap1a, Slc8a3	144	Kcnb2, Rbfox3, Cdh18, Hs3st4, Grik1, Trhde, Dpp6, Sgcd, Pcdh10, Ntrk3, Slc8a3, Pcdh11x, Upp2, Meg3, Samd4, Cntnap2, Tmem132b, Mctp1, Jakmip2, Dner, Cacnb4, Kif26b, D430041D05Rik, Naaladl2, Sgcz, Brinp1, Xkr6, Atp8a2, Stxbp1, Dnajc6, Brinp3, Rps2, Diaph2, Igsf8, Rpsa, Plcl1, Ubc, Ifitm3, Epas1, Cobll1, Rps4x, Actb, Rpl3, Cfl1, Cdc42, Spock2, ENSMUSG00000040904, Rps29, Rps24, B2m, Atp6v0c, Rap1a, R…	1619
GO:0051781	positive regulation of cell division	12	2	1.07	0.29093	0.29093	3dpi	BP	NonN_8	GO:0051781	Cdc42, Ptn	144	Kcnb2, Rbfox3, Cdh18, Hs3st4, Grik1, Trhde, Dpp6, Sgcd, Pcdh10, Ntrk3, Slc8a3, Pcdh11x, Upp2, Meg3, Samd4, Cntnap2, Tmem132b, Mctp1, Jakmip2, Dner, Cacnb4, Kif26b, D430041D05Rik, Naaladl2, Sgcz, Brinp1, Xkr6, Atp8a2, Stxbp1, Dnajc6, Brinp3, Rps2, Diaph2, Igsf8, Rpsa, Plcl1, Ubc, Ifitm3, Epas1, Cobll1, Rps4x, Actb, Rpl3, Cfl1, Cdc42, Spock2, ENSMUSG00000040904, Rps29, Rps24, B2m, Atp6v0c, Rap1a, R…	1619
GO:0060042	retina morphogenesis in camera-type eye	12	2	1.07	0.29093	0.29093	3dpi	BP	NonN_8	GO:0060042	Atp8a2, Ptn	144	Kcnb2, Rbfox3, Cdh18, Hs3st4, Grik1, Trhde, Dpp6, Sgcd, Pcdh10, Ntrk3, Slc8a3, Pcdh11x, Upp2, Meg3, Samd4, Cntnap2, Tmem132b, Mctp1, Jakmip2, Dner, Cacnb4, Kif26b, D430041D05Rik, Naaladl2, Sgcz, Brinp1, Xkr6, Atp8a2, Stxbp1, Dnajc6, Brinp3, Rps2, Diaph2, Igsf8, Rpsa, Plcl1, Ubc, Ifitm3, Epas1, Cobll1, Rps4x, Actb, Rpl3, Cfl1, Cdc42, Spock2, ENSMUSG00000040904, Rps29, Rps24, B2m, Atp6v0c, Rap1a, R…	1619
GO:0061640	cytoskeleton-dependent cytokinesis	12	2	1.07	0.29093	0.29093	3dpi	BP	NonN_8	GO:0061640	Cfl1, Septin7	144	Kcnb2, Rbfox3, Cdh18, Hs3st4, Grik1, Trhde, Dpp6, Sgcd, Pcdh10, Ntrk3, Slc8a3, Pcdh11x, Upp2, Meg3, Samd4, Cntnap2, Tmem132b, Mctp1, Jakmip2, Dner, Cacnb4, Kif26b, D430041D05Rik, Naaladl2, Sgcz, Brinp1, Xkr6, Atp8a2, Stxbp1, Dnajc6, Brinp3, Rps2, Diaph2, Igsf8, Rpsa, Plcl1, Ubc, Ifitm3, Epas1, Cobll1, Rps4x, Actb, Rpl3, Cfl1, Cdc42, Spock2, ENSMUSG00000040904, Rps29, Rps24, B2m, Atp6v0c, Rap1a, R…	1619
GO:0070301	cellular response to hydrogen peroxide	12	2	1.07	0.29093	0.29093	3dpi	BP	NonN_8	GO:0070301	Cfl1, Rps3	144	Kcnb2, Rbfox3, Cdh18, Hs3st4, Grik1, Trhde, Dpp6, Sgcd, Pcdh10, Ntrk3, Slc8a3, Pcdh11x, Upp2, Meg3, Samd4, Cntnap2, Tmem132b, Mctp1, Jakmip2, Dner, Cacnb4, Kif26b, D430041D05Rik, Naaladl2, Sgcz, Brinp1, Xkr6, Atp8a2, Stxbp1, Dnajc6, Brinp3, Rps2, Diaph2, Igsf8, Rpsa, Plcl1, Ubc, Ifitm3, Epas1, Cobll1, Rps4x, Actb, Rpl3, Cfl1, Cdc42, Spock2, ENSMUSG00000040904, Rps29, Rps24, B2m, Atp6v0c, Rap1a, R…	1619
GO:0071466	cellular response to xenobiotic stimulus	12	2	1.07	0.29093	0.29093	3dpi	BP	NonN_8	GO:0071466	Gstp1, Rap1a	144	Kcnb2, Rbfox3, Cdh18, Hs3st4, Grik1, Trhde, Dpp6, Sgcd, Pcdh10, Ntrk3, Slc8a3, Pcdh11x, Upp2, Meg3, Samd4, Cntnap2, Tmem132b, Mctp1, Jakmip2, Dner, Cacnb4, Kif26b, D430041D05Rik, Naaladl2, Sgcz, Brinp1, Xkr6, Atp8a2, Stxbp1, Dnajc6, Brinp3, Rps2, Diaph2, Igsf8, Rpsa, Plcl1, Ubc, Ifitm3, Epas1, Cobll1, Rps4x, Actb, Rpl3, Cfl1, Cdc42, Spock2, ENSMUSG00000040904, Rps29, Rps24, B2m, Atp6v0c, Rap1a, R…	1619
GO:1902806	regulation of cell cycle G1/S phase tran...	12	2	1.07	0.29093	0.29093	3dpi	BP	NonN_8	GO:1902806	Cacnb4, Rpl17	144	Kcnb2, Rbfox3, Cdh18, Hs3st4, Grik1, Trhde, Dpp6, Sgcd, Pcdh10, Ntrk3, Slc8a3, Pcdh11x, Upp2, Meg3, Samd4, Cntnap2, Tmem132b, Mctp1, Jakmip2, Dner, Cacnb4, Kif26b, D430041D05Rik, Naaladl2, Sgcz, Brinp1, Xkr6, Atp8a2, Stxbp1, Dnajc6, Brinp3, Rps2, Diaph2, Igsf8, Rpsa, Plcl1, Ubc, Ifitm3, Epas1, Cobll1, Rps4x, Actb, Rpl3, Cfl1, Cdc42, Spock2, ENSMUSG00000040904, Rps29, Rps24, B2m, Atp6v0c, Rap1a, R…	1619
GO:1990542	mitochondrial transmembrane transport	12	2	1.07	0.29093	0.29093	3dpi	BP	NonN_8	GO:1990542	Atp5j, Atp5j2	144	Kcnb2, Rbfox3, Cdh18, Hs3st4, Grik1, Trhde, Dpp6, Sgcd, Pcdh10, Ntrk3, Slc8a3, Pcdh11x, Upp2, Meg3, Samd4, Cntnap2, Tmem132b, Mctp1, Jakmip2, Dner, Cacnb4, Kif26b, D430041D05Rik, Naaladl2, Sgcz, Brinp1, Xkr6, Atp8a2, Stxbp1, Dnajc6, Brinp3, Rps2, Diaph2, Igsf8, Rpsa, Plcl1, Ubc, Ifitm3, Epas1, Cobll1, Rps4x, Actb, Rpl3, Cfl1, Cdc42, Spock2, ENSMUSG00000040904, Rps29, Rps24, B2m, Atp6v0c, Rap1a, R…	1619
GO:2000045	regulation of G1/S transition of mitotic...	12	2	1.07	0.29093	0.29093	3dpi	BP	NonN_8	GO:2000045	Cacnb4, Rpl17	144	Kcnb2, Rbfox3, Cdh18, Hs3st4, Grik1, Trhde, Dpp6, Sgcd, Pcdh10, Ntrk3, Slc8a3, Pcdh11x, Upp2, Meg3, Samd4, Cntnap2, Tmem132b, Mctp1, Jakmip2, Dner, Cacnb4, Kif26b, D430041D05Rik, Naaladl2, Sgcz, Brinp1, Xkr6, Atp8a2, Stxbp1, Dnajc6, Brinp3, Rps2, Diaph2, Igsf8, Rpsa, Plcl1, Ubc, Ifitm3, Epas1, Cobll1, Rps4x, Actb, Rpl3, Cfl1, Cdc42, Spock2, ENSMUSG00000040904, Rps29, Rps24, B2m, Atp6v0c, Rap1a, R…	1619
GO:0030003	cellular cation homeostasis	81	9	7.22	0.29188	0.29188	3dpi	BP	NonN_8	GO:0030003	Atp1a2, Atp6v0c, Cacnb4, Calm1, Calm2, Ftl1, Mt1, Ndfip1, Slc8a3	144	Kcnb2, Rbfox3, Cdh18, Hs3st4, Grik1, Trhde, Dpp6, Sgcd, Pcdh10, Ntrk3, Slc8a3, Pcdh11x, Upp2, Meg3, Samd4, Cntnap2, Tmem132b, Mctp1, Jakmip2, Dner, Cacnb4, Kif26b, D430041D05Rik, Naaladl2, Sgcz, Brinp1, Xkr6, Atp8a2, Stxbp1, Dnajc6, Brinp3, Rps2, Diaph2, Igsf8, Rpsa, Plcl1, Ubc, Ifitm3, Epas1, Cobll1, Rps4x, Actb, Rpl3, Cfl1, Cdc42, Spock2, ENSMUSG00000040904, Rps29, Rps24, B2m, Atp6v0c, Rap1a, R…	1619
GO:0007423	sensory organ development	71	8	6.33	0.29520	0.29520	3dpi	BP	NonN_8	GO:0007423	Atp8a2, Bsg, Igfbp7, Ntrk3, Pfdn5, Ptn, Rpl24, Rpl38	144	Kcnb2, Rbfox3, Cdh18, Hs3st4, Grik1, Trhde, Dpp6, Sgcd, Pcdh10, Ntrk3, Slc8a3, Pcdh11x, Upp2, Meg3, Samd4, Cntnap2, Tmem132b, Mctp1, Jakmip2, Dner, Cacnb4, Kif26b, D430041D05Rik, Naaladl2, Sgcz, Brinp1, Xkr6, Atp8a2, Stxbp1, Dnajc6, Brinp3, Rps2, Diaph2, Igsf8, Rpsa, Plcl1, Ubc, Ifitm3, Epas1, Cobll1, Rps4x, Actb, Rpl3, Cfl1, Cdc42, Spock2, ENSMUSG00000040904, Rps29, Rps24, B2m, Atp6v0c, Rap1a, R…	1619
GO:1903047	mitotic cell cycle process	71	8	6.33	0.29520	0.29520	3dpi	BP	NonN_8	GO:1903047	Cacnb4, Calm1, Calm2, Cdc42, Cfl1, Rpl17, Rpl24, Septin7	144	Kcnb2, Rbfox3, Cdh18, Hs3st4, Grik1, Trhde, Dpp6, Sgcd, Pcdh10, Ntrk3, Slc8a3, Pcdh11x, Upp2, Meg3, Samd4, Cntnap2, Tmem132b, Mctp1, Jakmip2, Dner, Cacnb4, Kif26b, D430041D05Rik, Naaladl2, Sgcz, Brinp1, Xkr6, Atp8a2, Stxbp1, Dnajc6, Brinp3, Rps2, Diaph2, Igsf8, Rpsa, Plcl1, Ubc, Ifitm3, Epas1, Cobll1, Rps4x, Actb, Rpl3, Cfl1, Cdc42, Spock2, ENSMUSG00000040904, Rps29, Rps24, B2m, Atp6v0c, Rap1a, R…	1619
GO:0006869	lipid transport	31	4	2.76	0.29664	0.29664	3dpi	BP	NonN_8	GO:0006869	Atp5j, Atp8a2, Pltp, Xkr6	144	Kcnb2, Rbfox3, Cdh18, Hs3st4, Grik1, Trhde, Dpp6, Sgcd, Pcdh10, Ntrk3, Slc8a3, Pcdh11x, Upp2, Meg3, Samd4, Cntnap2, Tmem132b, Mctp1, Jakmip2, Dner, Cacnb4, Kif26b, D430041D05Rik, Naaladl2, Sgcz, Brinp1, Xkr6, Atp8a2, Stxbp1, Dnajc6, Brinp3, Rps2, Diaph2, Igsf8, Rpsa, Plcl1, Ubc, Ifitm3, Epas1, Cobll1, Rps4x, Actb, Rpl3, Cfl1, Cdc42, Spock2, ENSMUSG00000040904, Rps29, Rps24, B2m, Atp6v0c, Rap1a, R…	1619
GO:0006937	regulation of muscle contraction	31	4	2.76	0.29664	0.29664	3dpi	BP	NonN_8	GO:0006937	Atp1a2, Calm1, Calm2, Slc8a3	144	Kcnb2, Rbfox3, Cdh18, Hs3st4, Grik1, Trhde, Dpp6, Sgcd, Pcdh10, Ntrk3, Slc8a3, Pcdh11x, Upp2, Meg3, Samd4, Cntnap2, Tmem132b, Mctp1, Jakmip2, Dner, Cacnb4, Kif26b, D430041D05Rik, Naaladl2, Sgcz, Brinp1, Xkr6, Atp8a2, Stxbp1, Dnajc6, Brinp3, Rps2, Diaph2, Igsf8, Rpsa, Plcl1, Ubc, Ifitm3, Epas1, Cobll1, Rps4x, Actb, Rpl3, Cfl1, Cdc42, Spock2, ENSMUSG00000040904, Rps29, Rps24, B2m, Atp6v0c, Rap1a, R…	1619
GO:0050821	protein stabilization	31	4	2.76	0.29664	0.29664	3dpi	BP	NonN_8	GO:0050821	Hsp90ab1, Rpl11, Rpl23, Stxbp1	144	Kcnb2, Rbfox3, Cdh18, Hs3st4, Grik1, Trhde, Dpp6, Sgcd, Pcdh10, Ntrk3, Slc8a3, Pcdh11x, Upp2, Meg3, Samd4, Cntnap2, Tmem132b, Mctp1, Jakmip2, Dner, Cacnb4, Kif26b, D430041D05Rik, Naaladl2, Sgcz, Brinp1, Xkr6, Atp8a2, Stxbp1, Dnajc6, Brinp3, Rps2, Diaph2, Igsf8, Rpsa, Plcl1, Ubc, Ifitm3, Epas1, Cobll1, Rps4x, Actb, Rpl3, Cfl1, Cdc42, Spock2, ENSMUSG00000040904, Rps29, Rps24, B2m, Atp6v0c, Rap1a, R…	1619
GO:0003012	muscle system process	61	7	5.44	0.29792	0.29792	3dpi	BP	NonN_8	GO:0003012	Aldoa, Atp1a2, Atp8a2, Calm1, Calm2, Sgcd, Slc8a3	144	Kcnb2, Rbfox3, Cdh18, Hs3st4, Grik1, Trhde, Dpp6, Sgcd, Pcdh10, Ntrk3, Slc8a3, Pcdh11x, Upp2, Meg3, Samd4, Cntnap2, Tmem132b, Mctp1, Jakmip2, Dner, Cacnb4, Kif26b, D430041D05Rik, Naaladl2, Sgcz, Brinp1, Xkr6, Atp8a2, Stxbp1, Dnajc6, Brinp3, Rps2, Diaph2, Igsf8, Rpsa, Plcl1, Ubc, Ifitm3, Epas1, Cobll1, Rps4x, Actb, Rpl3, Cfl1, Cdc42, Spock2, ENSMUSG00000040904, Rps29, Rps24, B2m, Atp6v0c, Rap1a, R…	1619
GO:0042176	regulation of protein catabolic process	51	6	4.55	0.29968	0.29968	3dpi	BP	NonN_8	GO:0042176	Cd81, Hsp90ab1, Ndfip1, Rpl11, Rpl23, Ubb	144	Kcnb2, Rbfox3, Cdh18, Hs3st4, Grik1, Trhde, Dpp6, Sgcd, Pcdh10, Ntrk3, Slc8a3, Pcdh11x, Upp2, Meg3, Samd4, Cntnap2, Tmem132b, Mctp1, Jakmip2, Dner, Cacnb4, Kif26b, D430041D05Rik, Naaladl2, Sgcz, Brinp1, Xkr6, Atp8a2, Stxbp1, Dnajc6, Brinp3, Rps2, Diaph2, Igsf8, Rpsa, Plcl1, Ubc, Ifitm3, Epas1, Cobll1, Rps4x, Actb, Rpl3, Cfl1, Cdc42, Spock2, ENSMUSG00000040904, Rps29, Rps24, B2m, Atp6v0c, Rap1a, R…	1619
GO:0048608	reproductive structure development	41	5	3.66	0.29975	0.29975	3dpi	BP	NonN_8	GO:0048608	Epas1, H3f3b, Hsp90ab1, Ptn, Ubb	144	Kcnb2, Rbfox3, Cdh18, Hs3st4, Grik1, Trhde, Dpp6, Sgcd, Pcdh10, Ntrk3, Slc8a3, Pcdh11x, Upp2, Meg3, Samd4, Cntnap2, Tmem132b, Mctp1, Jakmip2, Dner, Cacnb4, Kif26b, D430041D05Rik, Naaladl2, Sgcz, Brinp1, Xkr6, Atp8a2, Stxbp1, Dnajc6, Brinp3, Rps2, Diaph2, Igsf8, Rpsa, Plcl1, Ubc, Ifitm3, Epas1, Cobll1, Rps4x, Actb, Rpl3, Cfl1, Cdc42, Spock2, ENSMUSG00000040904, Rps29, Rps24, B2m, Atp6v0c, Rap1a, R…	1619
GO:1902533	positive regulation of intracellular sig...	134	14	11.95	0.30172	0.78020	3dpi	BP	NonN_8	GO:1902533	Atp6v0c, Cd81, Cdc42, Hint1, Hsp90ab1, Ntrk3, Ppia, Rap1a, Rpl11, Rpl23, Rpl37, Rps20, Rps3, Ubb	144	Kcnb2, Rbfox3, Cdh18, Hs3st4, Grik1, Trhde, Dpp6, Sgcd, Pcdh10, Ntrk3, Slc8a3, Pcdh11x, Upp2, Meg3, Samd4, Cntnap2, Tmem132b, Mctp1, Jakmip2, Dner, Cacnb4, Kif26b, D430041D05Rik, Naaladl2, Sgcz, Brinp1, Xkr6, Atp8a2, Stxbp1, Dnajc6, Brinp3, Rps2, Diaph2, Igsf8, Rpsa, Plcl1, Ubc, Ifitm3, Epas1, Cobll1, Rps4x, Actb, Rpl3, Cfl1, Cdc42, Spock2, ENSMUSG00000040904, Rps29, Rps24, B2m, Atp6v0c, Rap1a, R…	1619
GO:0003013	circulatory system process	82	9	7.31	0.30469	0.30469	3dpi	BP	NonN_8	GO:0003013	Atp1a2, Atp5j, Calm1, Calm2, Cdc42, Epas1, Sgcd, Sgcz, Trhde	144	Kcnb2, Rbfox3, Cdh18, Hs3st4, Grik1, Trhde, Dpp6, Sgcd, Pcdh10, Ntrk3, Slc8a3, Pcdh11x, Upp2, Meg3, Samd4, Cntnap2, Tmem132b, Mctp1, Jakmip2, Dner, Cacnb4, Kif26b, D430041D05Rik, Naaladl2, Sgcz, Brinp1, Xkr6, Atp8a2, Stxbp1, Dnajc6, Brinp3, Rps2, Diaph2, Igsf8, Rpsa, Plcl1, Ubc, Ifitm3, Epas1, Cobll1, Rps4x, Actb, Rpl3, Cfl1, Cdc42, Spock2, ENSMUSG00000040904, Rps29, Rps24, B2m, Atp6v0c, Rap1a, R…	1619
GO:0032880	regulation of protein localization	124	13	11.06	0.30729	0.30729	3dpi	BP	NonN_8	GO:0032880	Actb, Bsg, Cacnb4, Cd81, Cdc42, Cfl1, Dpp6, Hsp90ab1, Ndfip1, Pde8b, Ppia, Ptn, Rap1a	144	Kcnb2, Rbfox3, Cdh18, Hs3st4, Grik1, Trhde, Dpp6, Sgcd, Pcdh10, Ntrk3, Slc8a3, Pcdh11x, Upp2, Meg3, Samd4, Cntnap2, Tmem132b, Mctp1, Jakmip2, Dner, Cacnb4, Kif26b, D430041D05Rik, Naaladl2, Sgcz, Brinp1, Xkr6, Atp8a2, Stxbp1, Dnajc6, Brinp3, Rps2, Diaph2, Igsf8, Rpsa, Plcl1, Ubc, Ifitm3, Epas1, Cobll1, Rps4x, Actb, Rpl3, Cfl1, Cdc42, Spock2, ENSMUSG00000040904, Rps29, Rps24, B2m, Atp6v0c, Rap1a, R…	1619
GO:0034763	negative regulation of transmembrane tra...	22	3	1.96	0.31199	0.31199	3dpi	BP	NonN_8	GO:0034763	Atp1a2, Calm1, Calm2	144	Kcnb2, Rbfox3, Cdh18, Hs3st4, Grik1, Trhde, Dpp6, Sgcd, Pcdh10, Ntrk3, Slc8a3, Pcdh11x, Upp2, Meg3, Samd4, Cntnap2, Tmem132b, Mctp1, Jakmip2, Dner, Cacnb4, Kif26b, D430041D05Rik, Naaladl2, Sgcz, Brinp1, Xkr6, Atp8a2, Stxbp1, Dnajc6, Brinp3, Rps2, Diaph2, Igsf8, Rpsa, Plcl1, Ubc, Ifitm3, Epas1, Cobll1, Rps4x, Actb, Rpl3, Cfl1, Cdc42, Spock2, ENSMUSG00000040904, Rps29, Rps24, B2m, Atp6v0c, Rap1a, R…	1619
GO:0044070	regulation of anion transport	22	3	1.96	0.31199	0.31199	3dpi	BP	NonN_8	GO:0044070	Atp5j, Grik1, Stxbp1	144	Kcnb2, Rbfox3, Cdh18, Hs3st4, Grik1, Trhde, Dpp6, Sgcd, Pcdh10, Ntrk3, Slc8a3, Pcdh11x, Upp2, Meg3, Samd4, Cntnap2, Tmem132b, Mctp1, Jakmip2, Dner, Cacnb4, Kif26b, D430041D05Rik, Naaladl2, Sgcz, Brinp1, Xkr6, Atp8a2, Stxbp1, Dnajc6, Brinp3, Rps2, Diaph2, Igsf8, Rpsa, Plcl1, Ubc, Ifitm3, Epas1, Cobll1, Rps4x, Actb, Rpl3, Cfl1, Cdc42, Spock2, ENSMUSG00000040904, Rps29, Rps24, B2m, Atp6v0c, Rap1a, R…	1619
GO:0048488	synaptic vesicle endocytosis	22	3	1.96	0.31199	0.31199	3dpi	BP	NonN_8	GO:0048488	Actb, Calm1, Dnajc6	144	Kcnb2, Rbfox3, Cdh18, Hs3st4, Grik1, Trhde, Dpp6, Sgcd, Pcdh10, Ntrk3, Slc8a3, Pcdh11x, Upp2, Meg3, Samd4, Cntnap2, Tmem132b, Mctp1, Jakmip2, Dner, Cacnb4, Kif26b, D430041D05Rik, Naaladl2, Sgcz, Brinp1, Xkr6, Atp8a2, Stxbp1, Dnajc6, Brinp3, Rps2, Diaph2, Igsf8, Rpsa, Plcl1, Ubc, Ifitm3, Epas1, Cobll1, Rps4x, Actb, Rpl3, Cfl1, Cdc42, Spock2, ENSMUSG00000040904, Rps29, Rps24, B2m, Atp6v0c, Rap1a, R…	1619
GO:0071453	cellular response to oxygen levels	22	3	1.96	0.31199	0.31199	3dpi	BP	NonN_8	GO:0071453	Chchd2, Epas1, Slc8a3	144	Kcnb2, Rbfox3, Cdh18, Hs3st4, Grik1, Trhde, Dpp6, Sgcd, Pcdh10, Ntrk3, Slc8a3, Pcdh11x, Upp2, Meg3, Samd4, Cntnap2, Tmem132b, Mctp1, Jakmip2, Dner, Cacnb4, Kif26b, D430041D05Rik, Naaladl2, Sgcz, Brinp1, Xkr6, Atp8a2, Stxbp1, Dnajc6, Brinp3, Rps2, Diaph2, Igsf8, Rpsa, Plcl1, Ubc, Ifitm3, Epas1, Cobll1, Rps4x, Actb, Rpl3, Cfl1, Cdc42, Spock2, ENSMUSG00000040904, Rps29, Rps24, B2m, Atp6v0c, Rap1a, R…	1619
GO:0140238	presynaptic endocytosis	22	3	1.96	0.31199	0.31199	3dpi	BP	NonN_8	GO:0140238	Actb, Calm1, Dnajc6	144	Kcnb2, Rbfox3, Cdh18, Hs3st4, Grik1, Trhde, Dpp6, Sgcd, Pcdh10, Ntrk3, Slc8a3, Pcdh11x, Upp2, Meg3, Samd4, Cntnap2, Tmem132b, Mctp1, Jakmip2, Dner, Cacnb4, Kif26b, D430041D05Rik, Naaladl2, Sgcz, Brinp1, Xkr6, Atp8a2, Stxbp1, Dnajc6, Brinp3, Rps2, Diaph2, Igsf8, Rpsa, Plcl1, Ubc, Ifitm3, Epas1, Cobll1, Rps4x, Actb, Rpl3, Cfl1, Cdc42, Spock2, ENSMUSG00000040904, Rps29, Rps24, B2m, Atp6v0c, Rap1a, R…	1619
GO:1902115	regulation of organelle assembly	22	3	1.96	0.31199	0.31199	3dpi	BP	NonN_8	GO:1902115	Dynll1, Ntrk3, Septin7	144	Kcnb2, Rbfox3, Cdh18, Hs3st4, Grik1, Trhde, Dpp6, Sgcd, Pcdh10, Ntrk3, Slc8a3, Pcdh11x, Upp2, Meg3, Samd4, Cntnap2, Tmem132b, Mctp1, Jakmip2, Dner, Cacnb4, Kif26b, D430041D05Rik, Naaladl2, Sgcz, Brinp1, Xkr6, Atp8a2, Stxbp1, Dnajc6, Brinp3, Rps2, Diaph2, Igsf8, Rpsa, Plcl1, Ubc, Ifitm3, Epas1, Cobll1, Rps4x, Actb, Rpl3, Cfl1, Cdc42, Spock2, ENSMUSG00000040904, Rps29, Rps24, B2m, Atp6v0c, Rap1a, R…	1619
GO:0042326	negative regulation of phosphorylation	52	6	4.64	0.31599	0.31599	3dpi	BP	NonN_8	GO:0042326	Actb, Dynll1, Gstp1, Ntrk3, Ppia, Slc8a3	144	Kcnb2, Rbfox3, Cdh18, Hs3st4, Grik1, Trhde, Dpp6, Sgcd, Pcdh10, Ntrk3, Slc8a3, Pcdh11x, Upp2, Meg3, Samd4, Cntnap2, Tmem132b, Mctp1, Jakmip2, Dner, Cacnb4, Kif26b, D430041D05Rik, Naaladl2, Sgcz, Brinp1, Xkr6, Atp8a2, Stxbp1, Dnajc6, Brinp3, Rps2, Diaph2, Igsf8, Rpsa, Plcl1, Ubc, Ifitm3, Epas1, Cobll1, Rps4x, Actb, Rpl3, Cfl1, Cdc42, Spock2, ENSMUSG00000040904, Rps29, Rps24, B2m, Atp6v0c, Rap1a, R…	1619
GO:0008037	cell recognition	32	4	2.85	0.31762	0.31762	3dpi	BP	NonN_8	GO:0008037	Aldoa, Bsg, Cd81, Cntnap2	144	Kcnb2, Rbfox3, Cdh18, Hs3st4, Grik1, Trhde, Dpp6, Sgcd, Pcdh10, Ntrk3, Slc8a3, Pcdh11x, Upp2, Meg3, Samd4, Cntnap2, Tmem132b, Mctp1, Jakmip2, Dner, Cacnb4, Kif26b, D430041D05Rik, Naaladl2, Sgcz, Brinp1, Xkr6, Atp8a2, Stxbp1, Dnajc6, Brinp3, Rps2, Diaph2, Igsf8, Rpsa, Plcl1, Ubc, Ifitm3, Epas1, Cobll1, Rps4x, Actb, Rpl3, Cfl1, Cdc42, Spock2, ENSMUSG00000040904, Rps29, Rps24, B2m, Atp6v0c, Rap1a, R…	1619
GO:0010721	negative regulation of cell development	32	4	2.85	0.31762	0.31762	3dpi	BP	NonN_8	GO:0010721	B2m, Brinp1, Ntrk3, Ptn	144	Kcnb2, Rbfox3, Cdh18, Hs3st4, Grik1, Trhde, Dpp6, Sgcd, Pcdh10, Ntrk3, Slc8a3, Pcdh11x, Upp2, Meg3, Samd4, Cntnap2, Tmem132b, Mctp1, Jakmip2, Dner, Cacnb4, Kif26b, D430041D05Rik, Naaladl2, Sgcz, Brinp1, Xkr6, Atp8a2, Stxbp1, Dnajc6, Brinp3, Rps2, Diaph2, Igsf8, Rpsa, Plcl1, Ubc, Ifitm3, Epas1, Cobll1, Rps4x, Actb, Rpl3, Cfl1, Cdc42, Spock2, ENSMUSG00000040904, Rps29, Rps24, B2m, Atp6v0c, Rap1a, R…	1619
GO:0016079	synaptic vesicle exocytosis	32	4	2.85	0.31762	0.31762	3dpi	BP	NonN_8	GO:0016079	Cacnb4, Calm1, Rap1a, Stxbp1	144	Kcnb2, Rbfox3, Cdh18, Hs3st4, Grik1, Trhde, Dpp6, Sgcd, Pcdh10, Ntrk3, Slc8a3, Pcdh11x, Upp2, Meg3, Samd4, Cntnap2, Tmem132b, Mctp1, Jakmip2, Dner, Cacnb4, Kif26b, D430041D05Rik, Naaladl2, Sgcz, Brinp1, Xkr6, Atp8a2, Stxbp1, Dnajc6, Brinp3, Rps2, Diaph2, Igsf8, Rpsa, Plcl1, Ubc, Ifitm3, Epas1, Cobll1, Rps4x, Actb, Rpl3, Cfl1, Cdc42, Spock2, ENSMUSG00000040904, Rps29, Rps24, B2m, Atp6v0c, Rap1a, R…	1619
GO:0031333	negative regulation of protein-containin...	32	4	2.85	0.31762	0.31762	3dpi	BP	NonN_8	GO:0031333	Cdc42, Cfl1, Stxbp1, Tmsb10	144	Kcnb2, Rbfox3, Cdh18, Hs3st4, Grik1, Trhde, Dpp6, Sgcd, Pcdh10, Ntrk3, Slc8a3, Pcdh11x, Upp2, Meg3, Samd4, Cntnap2, Tmem132b, Mctp1, Jakmip2, Dner, Cacnb4, Kif26b, D430041D05Rik, Naaladl2, Sgcz, Brinp1, Xkr6, Atp8a2, Stxbp1, Dnajc6, Brinp3, Rps2, Diaph2, Igsf8, Rpsa, Plcl1, Ubc, Ifitm3, Epas1, Cobll1, Rps4x, Actb, Rpl3, Cfl1, Cdc42, Spock2, ENSMUSG00000040904, Rps29, Rps24, B2m, Atp6v0c, Rap1a, R…	1619
GO:0046942	carboxylic acid transport	32	4	2.85	0.31762	0.31762	3dpi	BP	NonN_8	GO:0046942	Atp5j, Cacnb4, Grik1, Stxbp1	144	Kcnb2, Rbfox3, Cdh18, Hs3st4, Grik1, Trhde, Dpp6, Sgcd, Pcdh10, Ntrk3, Slc8a3, Pcdh11x, Upp2, Meg3, Samd4, Cntnap2, Tmem132b, Mctp1, Jakmip2, Dner, Cacnb4, Kif26b, D430041D05Rik, Naaladl2, Sgcz, Brinp1, Xkr6, Atp8a2, Stxbp1, Dnajc6, Brinp3, Rps2, Diaph2, Igsf8, Rpsa, Plcl1, Ubc, Ifitm3, Epas1, Cobll1, Rps4x, Actb, Rpl3, Cfl1, Cdc42, Spock2, ENSMUSG00000040904, Rps29, Rps24, B2m, Atp6v0c, Rap1a, R…	1619
GO:0051403	stress-activated MAPK cascade	32	4	2.85	0.31762	0.31762	3dpi	BP	NonN_8	GO:0051403	Cdc42, Gstp1, Ppia, Prdx1	144	Kcnb2, Rbfox3, Cdh18, Hs3st4, Grik1, Trhde, Dpp6, Sgcd, Pcdh10, Ntrk3, Slc8a3, Pcdh11x, Upp2, Meg3, Samd4, Cntnap2, Tmem132b, Mctp1, Jakmip2, Dner, Cacnb4, Kif26b, D430041D05Rik, Naaladl2, Sgcz, Brinp1, Xkr6, Atp8a2, Stxbp1, Dnajc6, Brinp3, Rps2, Diaph2, Igsf8, Rpsa, Plcl1, Ubc, Ifitm3, Epas1, Cobll1, Rps4x, Actb, Rpl3, Cfl1, Cdc42, Spock2, ENSMUSG00000040904, Rps29, Rps24, B2m, Atp6v0c, Rap1a, R…	1619
GO:0007269	neurotransmitter secretion	42	5	3.75	0.31798	0.31798	3dpi	BP	NonN_8	GO:0007269	Cacnb4, Calm1, Mctp1, Rap1a, Stxbp1	144	Kcnb2, Rbfox3, Cdh18, Hs3st4, Grik1, Trhde, Dpp6, Sgcd, Pcdh10, Ntrk3, Slc8a3, Pcdh11x, Upp2, Meg3, Samd4, Cntnap2, Tmem132b, Mctp1, Jakmip2, Dner, Cacnb4, Kif26b, D430041D05Rik, Naaladl2, Sgcz, Brinp1, Xkr6, Atp8a2, Stxbp1, Dnajc6, Brinp3, Rps2, Diaph2, Igsf8, Rpsa, Plcl1, Ubc, Ifitm3, Epas1, Cobll1, Rps4x, Actb, Rpl3, Cfl1, Cdc42, Spock2, ENSMUSG00000040904, Rps29, Rps24, B2m, Atp6v0c, Rap1a, R…	1619
GO:0048232	male gamete generation	42	5	3.75	0.31798	0.31798	3dpi	BP	NonN_8	GO:0048232	Bsg, Gpx4, H3f3b, Septin7, Ubb	144	Kcnb2, Rbfox3, Cdh18, Hs3st4, Grik1, Trhde, Dpp6, Sgcd, Pcdh10, Ntrk3, Slc8a3, Pcdh11x, Upp2, Meg3, Samd4, Cntnap2, Tmem132b, Mctp1, Jakmip2, Dner, Cacnb4, Kif26b, D430041D05Rik, Naaladl2, Sgcz, Brinp1, Xkr6, Atp8a2, Stxbp1, Dnajc6, Brinp3, Rps2, Diaph2, Igsf8, Rpsa, Plcl1, Ubc, Ifitm3, Epas1, Cobll1, Rps4x, Actb, Rpl3, Cfl1, Cdc42, Spock2, ENSMUSG00000040904, Rps29, Rps24, B2m, Atp6v0c, Rap1a, R…	1619
GO:0061458	reproductive system development	42	5	3.75	0.31798	0.31798	3dpi	BP	NonN_8	GO:0061458	Epas1, H3f3b, Hsp90ab1, Ptn, Ubb	144	Kcnb2, Rbfox3, Cdh18, Hs3st4, Grik1, Trhde, Dpp6, Sgcd, Pcdh10, Ntrk3, Slc8a3, Pcdh11x, Upp2, Meg3, Samd4, Cntnap2, Tmem132b, Mctp1, Jakmip2, Dner, Cacnb4, Kif26b, D430041D05Rik, Naaladl2, Sgcz, Brinp1, Xkr6, Atp8a2, Stxbp1, Dnajc6, Brinp3, Rps2, Diaph2, Igsf8, Rpsa, Plcl1, Ubc, Ifitm3, Epas1, Cobll1, Rps4x, Actb, Rpl3, Cfl1, Cdc42, Spock2, ENSMUSG00000040904, Rps29, Rps24, B2m, Atp6v0c, Rap1a, R…	1619
GO:0099643	signal release from synapse	42	5	3.75	0.31798	0.31798	3dpi	BP	NonN_8	GO:0099643	Cacnb4, Calm1, Mctp1, Rap1a, Stxbp1	144	Kcnb2, Rbfox3, Cdh18, Hs3st4, Grik1, Trhde, Dpp6, Sgcd, Pcdh10, Ntrk3, Slc8a3, Pcdh11x, Upp2, Meg3, Samd4, Cntnap2, Tmem132b, Mctp1, Jakmip2, Dner, Cacnb4, Kif26b, D430041D05Rik, Naaladl2, Sgcz, Brinp1, Xkr6, Atp8a2, Stxbp1, Dnajc6, Brinp3, Rps2, Diaph2, Igsf8, Rpsa, Plcl1, Ubc, Ifitm3, Epas1, Cobll1, Rps4x, Actb, Rpl3, Cfl1, Cdc42, Spock2, ENSMUSG00000040904, Rps29, Rps24, B2m, Atp6v0c, Rap1a, R…	1619
GO:0051246	regulation of protein metabolic process	265	26	23.63	0.32252	0.84560	3dpi	BP	NonN_8	GO:0051246	Actb, Calm1, Calm2, Cd81, Cfl1, Cst3, Eif1, Epas1, Gstp1, Hsp90ab1, Itm2b, Ndfip1, Ntrk3, Pfdn5, Plcl1, Ppia, Rap1a, Rpl11, Rpl23, Rpl38, Rplp1, Rps2, Rps3, Samd4, Slc8a3, Ubb	144	Kcnb2, Rbfox3, Cdh18, Hs3st4, Grik1, Trhde, Dpp6, Sgcd, Pcdh10, Ntrk3, Slc8a3, Pcdh11x, Upp2, Meg3, Samd4, Cntnap2, Tmem132b, Mctp1, Jakmip2, Dner, Cacnb4, Kif26b, D430041D05Rik, Naaladl2, Sgcz, Brinp1, Xkr6, Atp8a2, Stxbp1, Dnajc6, Brinp3, Rps2, Diaph2, Igsf8, Rpsa, Plcl1, Ubc, Ifitm3, Epas1, Cobll1, Rps4x, Actb, Rpl3, Cfl1, Cdc42, Spock2, ENSMUSG00000040904, Rps29, Rps24, B2m, Atp6v0c, Rap1a, R…	1619
GO:0009607	response to biotic stimulus	94	10	8.38	0.32469	0.32469	3dpi	BP	NonN_8	GO:0009607	B2m, Cdc42, Fau, Gstp1, Ifitm3, Naaladl2, Prdx1, Rpl30, Rps15a, Stxbp1	144	Kcnb2, Rbfox3, Cdh18, Hs3st4, Grik1, Trhde, Dpp6, Sgcd, Pcdh10, Ntrk3, Slc8a3, Pcdh11x, Upp2, Meg3, Samd4, Cntnap2, Tmem132b, Mctp1, Jakmip2, Dner, Cacnb4, Kif26b, D430041D05Rik, Naaladl2, Sgcz, Brinp1, Xkr6, Atp8a2, Stxbp1, Dnajc6, Brinp3, Rps2, Diaph2, Igsf8, Rpsa, Plcl1, Ubc, Ifitm3, Epas1, Cobll1, Rps4x, Actb, Rpl3, Cfl1, Cdc42, Spock2, ENSMUSG00000040904, Rps29, Rps24, B2m, Atp6v0c, Rap1a, R…	1619
GO:0042391	regulation of membrane potential	94	10	8.38	0.32469	0.32469	3dpi	BP	NonN_8	GO:0042391	B2m, Cacnb4, Cntnap2, Dpp6, Grik1, Ndufc2, Ntrk3, Ptn, Slc8a3, Ubb	144	Kcnb2, Rbfox3, Cdh18, Hs3st4, Grik1, Trhde, Dpp6, Sgcd, Pcdh10, Ntrk3, Slc8a3, Pcdh11x, Upp2, Meg3, Samd4, Cntnap2, Tmem132b, Mctp1, Jakmip2, Dner, Cacnb4, Kif26b, D430041D05Rik, Naaladl2, Sgcz, Brinp1, Xkr6, Atp8a2, Stxbp1, Dnajc6, Brinp3, Rps2, Diaph2, Igsf8, Rpsa, Plcl1, Ubc, Ifitm3, Epas1, Cobll1, Rps4x, Actb, Rpl3, Cfl1, Cdc42, Spock2, ENSMUSG00000040904, Rps29, Rps24, B2m, Atp6v0c, Rap1a, R…	1619
GO:0000086	G2/M transition of mitotic cell cycle	13	2	1.16	0.32522	0.32522	3dpi	BP	NonN_8	GO:0000086	Calm1, Calm2	144	Kcnb2, Rbfox3, Cdh18, Hs3st4, Grik1, Trhde, Dpp6, Sgcd, Pcdh10, Ntrk3, Slc8a3, Pcdh11x, Upp2, Meg3, Samd4, Cntnap2, Tmem132b, Mctp1, Jakmip2, Dner, Cacnb4, Kif26b, D430041D05Rik, Naaladl2, Sgcz, Brinp1, Xkr6, Atp8a2, Stxbp1, Dnajc6, Brinp3, Rps2, Diaph2, Igsf8, Rpsa, Plcl1, Ubc, Ifitm3, Epas1, Cobll1, Rps4x, Actb, Rpl3, Cfl1, Cdc42, Spock2, ENSMUSG00000040904, Rps29, Rps24, B2m, Atp6v0c, Rap1a, R…	1619
GO:0002275	myeloid cell activation involved in immu...	13	2	1.16	0.32522	0.32522	3dpi	BP	NonN_8	GO:0002275	Ptgds, Stxbp1	144	Kcnb2, Rbfox3, Cdh18, Hs3st4, Grik1, Trhde, Dpp6, Sgcd, Pcdh10, Ntrk3, Slc8a3, Pcdh11x, Upp2, Meg3, Samd4, Cntnap2, Tmem132b, Mctp1, Jakmip2, Dner, Cacnb4, Kif26b, D430041D05Rik, Naaladl2, Sgcz, Brinp1, Xkr6, Atp8a2, Stxbp1, Dnajc6, Brinp3, Rps2, Diaph2, Igsf8, Rpsa, Plcl1, Ubc, Ifitm3, Epas1, Cobll1, Rps4x, Actb, Rpl3, Cfl1, Cdc42, Spock2, ENSMUSG00000040904, Rps29, Rps24, B2m, Atp6v0c, Rap1a, R…	1619
GO:0002705	positive regulation of leukocyte mediate...	13	2	1.16	0.32522	0.32522	3dpi	BP	NonN_8	GO:0002705	B2m, Cd81	144	Kcnb2, Rbfox3, Cdh18, Hs3st4, Grik1, Trhde, Dpp6, Sgcd, Pcdh10, Ntrk3, Slc8a3, Pcdh11x, Upp2, Meg3, Samd4, Cntnap2, Tmem132b, Mctp1, Jakmip2, Dner, Cacnb4, Kif26b, D430041D05Rik, Naaladl2, Sgcz, Brinp1, Xkr6, Atp8a2, Stxbp1, Dnajc6, Brinp3, Rps2, Diaph2, Igsf8, Rpsa, Plcl1, Ubc, Ifitm3, Epas1, Cobll1, Rps4x, Actb, Rpl3, Cfl1, Cdc42, Spock2, ENSMUSG00000040904, Rps29, Rps24, B2m, Atp6v0c, Rap1a, R…	1619
GO:0006606	protein import into nucleus	13	2	1.16	0.32522	0.32522	3dpi	BP	NonN_8	GO:0006606	Cfl1, Hsp90ab1	144	Kcnb2, Rbfox3, Cdh18, Hs3st4, Grik1, Trhde, Dpp6, Sgcd, Pcdh10, Ntrk3, Slc8a3, Pcdh11x, Upp2, Meg3, Samd4, Cntnap2, Tmem132b, Mctp1, Jakmip2, Dner, Cacnb4, Kif26b, D430041D05Rik, Naaladl2, Sgcz, Brinp1, Xkr6, Atp8a2, Stxbp1, Dnajc6, Brinp3, Rps2, Diaph2, Igsf8, Rpsa, Plcl1, Ubc, Ifitm3, Epas1, Cobll1, Rps4x, Actb, Rpl3, Cfl1, Cdc42, Spock2, ENSMUSG00000040904, Rps29, Rps24, B2m, Atp6v0c, Rap1a, R…	1619
GO:0010324	membrane invagination	13	2	1.16	0.32522	0.32522	3dpi	BP	NonN_8	GO:0010324	Cdc42, Xkr6	144	Kcnb2, Rbfox3, Cdh18, Hs3st4, Grik1, Trhde, Dpp6, Sgcd, Pcdh10, Ntrk3, Slc8a3, Pcdh11x, Upp2, Meg3, Samd4, Cntnap2, Tmem132b, Mctp1, Jakmip2, Dner, Cacnb4, Kif26b, D430041D05Rik, Naaladl2, Sgcz, Brinp1, Xkr6, Atp8a2, Stxbp1, Dnajc6, Brinp3, Rps2, Diaph2, Igsf8, Rpsa, Plcl1, Ubc, Ifitm3, Epas1, Cobll1, Rps4x, Actb, Rpl3, Cfl1, Cdc42, Spock2, ENSMUSG00000040904, Rps29, Rps24, B2m, Atp6v0c, Rap1a, R…	1619
GO:0032892	positive regulation of organic acid tran...	13	2	1.16	0.32522	0.32522	3dpi	BP	NonN_8	GO:0032892	Grik1, Stxbp1	144	Kcnb2, Rbfox3, Cdh18, Hs3st4, Grik1, Trhde, Dpp6, Sgcd, Pcdh10, Ntrk3, Slc8a3, Pcdh11x, Upp2, Meg3, Samd4, Cntnap2, Tmem132b, Mctp1, Jakmip2, Dner, Cacnb4, Kif26b, D430041D05Rik, Naaladl2, Sgcz, Brinp1, Xkr6, Atp8a2, Stxbp1, Dnajc6, Brinp3, Rps2, Diaph2, Igsf8, Rpsa, Plcl1, Ubc, Ifitm3, Epas1, Cobll1, Rps4x, Actb, Rpl3, Cfl1, Cdc42, Spock2, ENSMUSG00000040904, Rps29, Rps24, B2m, Atp6v0c, Rap1a, R…	1619
GO:0042471	ear morphogenesis	13	2	1.16	0.32522	0.32522	3dpi	BP	NonN_8	GO:0042471	Atp8a2, Rpl38	144	Kcnb2, Rbfox3, Cdh18, Hs3st4, Grik1, Trhde, Dpp6, Sgcd, Pcdh10, Ntrk3, Slc8a3, Pcdh11x, Upp2, Meg3, Samd4, Cntnap2, Tmem132b, Mctp1, Jakmip2, Dner, Cacnb4, Kif26b, D430041D05Rik, Naaladl2, Sgcz, Brinp1, Xkr6, Atp8a2, Stxbp1, Dnajc6, Brinp3, Rps2, Diaph2, Igsf8, Rpsa, Plcl1, Ubc, Ifitm3, Epas1, Cobll1, Rps4x, Actb, Rpl3, Cfl1, Cdc42, Spock2, ENSMUSG00000040904, Rps29, Rps24, B2m, Atp6v0c, Rap1a, R…	1619
GO:0044706	multi-multicellular organism process	13	2	1.16	0.32522	0.32522	3dpi	BP	NonN_8	GO:0044706	H3f3b, Ptn	144	Kcnb2, Rbfox3, Cdh18, Hs3st4, Grik1, Trhde, Dpp6, Sgcd, Pcdh10, Ntrk3, Slc8a3, Pcdh11x, Upp2, Meg3, Samd4, Cntnap2, Tmem132b, Mctp1, Jakmip2, Dner, Cacnb4, Kif26b, D430041D05Rik, Naaladl2, Sgcz, Brinp1, Xkr6, Atp8a2, Stxbp1, Dnajc6, Brinp3, Rps2, Diaph2, Igsf8, Rpsa, Plcl1, Ubc, Ifitm3, Epas1, Cobll1, Rps4x, Actb, Rpl3, Cfl1, Cdc42, Spock2, ENSMUSG00000040904, Rps29, Rps24, B2m, Atp6v0c, Rap1a, R…	1619
GO:0048678	response to axon injury	13	2	1.16	0.32522	0.32522	3dpi	BP	NonN_8	GO:0048678	Ntrk3, Ptn	144	Kcnb2, Rbfox3, Cdh18, Hs3st4, Grik1, Trhde, Dpp6, Sgcd, Pcdh10, Ntrk3, Slc8a3, Pcdh11x, Upp2, Meg3, Samd4, Cntnap2, Tmem132b, Mctp1, Jakmip2, Dner, Cacnb4, Kif26b, D430041D05Rik, Naaladl2, Sgcz, Brinp1, Xkr6, Atp8a2, Stxbp1, Dnajc6, Brinp3, Rps2, Diaph2, Igsf8, Rpsa, Plcl1, Ubc, Ifitm3, Epas1, Cobll1, Rps4x, Actb, Rpl3, Cfl1, Cdc42, Spock2, ENSMUSG00000040904, Rps29, Rps24, B2m, Atp6v0c, Rap1a, R…	1619
GO:0050671	positive regulation of lymphocyte prolif...	13	2	1.16	0.32522	0.32522	3dpi	BP	NonN_8	GO:0050671	Cd81, Rps3	144	Kcnb2, Rbfox3, Cdh18, Hs3st4, Grik1, Trhde, Dpp6, Sgcd, Pcdh10, Ntrk3, Slc8a3, Pcdh11x, Upp2, Meg3, Samd4, Cntnap2, Tmem132b, Mctp1, Jakmip2, Dner, Cacnb4, Kif26b, D430041D05Rik, Naaladl2, Sgcz, Brinp1, Xkr6, Atp8a2, Stxbp1, Dnajc6, Brinp3, Rps2, Diaph2, Igsf8, Rpsa, Plcl1, Ubc, Ifitm3, Epas1, Cobll1, Rps4x, Actb, Rpl3, Cfl1, Cdc42, Spock2, ENSMUSG00000040904, Rps29, Rps24, B2m, Atp6v0c, Rap1a, R…	1619
GO:0050864	regulation of B cell activation	13	2	1.16	0.32522	0.32522	3dpi	BP	NonN_8	GO:0050864	Cd81, Ndfip1	144	Kcnb2, Rbfox3, Cdh18, Hs3st4, Grik1, Trhde, Dpp6, Sgcd, Pcdh10, Ntrk3, Slc8a3, Pcdh11x, Upp2, Meg3, Samd4, Cntnap2, Tmem132b, Mctp1, Jakmip2, Dner, Cacnb4, Kif26b, D430041D05Rik, Naaladl2, Sgcz, Brinp1, Xkr6, Atp8a2, Stxbp1, Dnajc6, Brinp3, Rps2, Diaph2, Igsf8, Rpsa, Plcl1, Ubc, Ifitm3, Epas1, Cobll1, Rps4x, Actb, Rpl3, Cfl1, Cdc42, Spock2, ENSMUSG00000040904, Rps29, Rps24, B2m, Atp6v0c, Rap1a, R…	1619
GO:0051170	import into nucleus	13	2	1.16	0.32522	0.32522	3dpi	BP	NonN_8	GO:0051170	Cfl1, Hsp90ab1	144	Kcnb2, Rbfox3, Cdh18, Hs3st4, Grik1, Trhde, Dpp6, Sgcd, Pcdh10, Ntrk3, Slc8a3, Pcdh11x, Upp2, Meg3, Samd4, Cntnap2, Tmem132b, Mctp1, Jakmip2, Dner, Cacnb4, Kif26b, D430041D05Rik, Naaladl2, Sgcz, Brinp1, Xkr6, Atp8a2, Stxbp1, Dnajc6, Brinp3, Rps2, Diaph2, Igsf8, Rpsa, Plcl1, Ubc, Ifitm3, Epas1, Cobll1, Rps4x, Actb, Rpl3, Cfl1, Cdc42, Spock2, ENSMUSG00000040904, Rps29, Rps24, B2m, Atp6v0c, Rap1a, R…	1619
GO:0051954	positive regulation of amine transport	13	2	1.16	0.32522	0.32522	3dpi	BP	NonN_8	GO:0051954	Grik1, Stxbp1	144	Kcnb2, Rbfox3, Cdh18, Hs3st4, Grik1, Trhde, Dpp6, Sgcd, Pcdh10, Ntrk3, Slc8a3, Pcdh11x, Upp2, Meg3, Samd4, Cntnap2, Tmem132b, Mctp1, Jakmip2, Dner, Cacnb4, Kif26b, D430041D05Rik, Naaladl2, Sgcz, Brinp1, Xkr6, Atp8a2, Stxbp1, Dnajc6, Brinp3, Rps2, Diaph2, Igsf8, Rpsa, Plcl1, Ubc, Ifitm3, Epas1, Cobll1, Rps4x, Actb, Rpl3, Cfl1, Cdc42, Spock2, ENSMUSG00000040904, Rps29, Rps24, B2m, Atp6v0c, Rap1a, R…	1619
GO:0051955	regulation of amino acid transport	13	2	1.16	0.32522	0.32522	3dpi	BP	NonN_8	GO:0051955	Grik1, Stxbp1	144	Kcnb2, Rbfox3, Cdh18, Hs3st4, Grik1, Trhde, Dpp6, Sgcd, Pcdh10, Ntrk3, Slc8a3, Pcdh11x, Upp2, Meg3, Samd4, Cntnap2, Tmem132b, Mctp1, Jakmip2, Dner, Cacnb4, Kif26b, D430041D05Rik, Naaladl2, Sgcz, Brinp1, Xkr6, Atp8a2, Stxbp1, Dnajc6, Brinp3, Rps2, Diaph2, Igsf8, Rpsa, Plcl1, Ubc, Ifitm3, Epas1, Cobll1, Rps4x, Actb, Rpl3, Cfl1, Cdc42, Spock2, ENSMUSG00000040904, Rps29, Rps24, B2m, Atp6v0c, Rap1a, R…	1619
GO:0097106	postsynaptic density organization	13	2	1.16	0.32522	0.32522	3dpi	BP	NonN_8	GO:0097106	Cfl1, Ntrk3	144	Kcnb2, Rbfox3, Cdh18, Hs3st4, Grik1, Trhde, Dpp6, Sgcd, Pcdh10, Ntrk3, Slc8a3, Pcdh11x, Upp2, Meg3, Samd4, Cntnap2, Tmem132b, Mctp1, Jakmip2, Dner, Cacnb4, Kif26b, D430041D05Rik, Naaladl2, Sgcz, Brinp1, Xkr6, Atp8a2, Stxbp1, Dnajc6, Brinp3, Rps2, Diaph2, Igsf8, Rpsa, Plcl1, Ubc, Ifitm3, Epas1, Cobll1, Rps4x, Actb, Rpl3, Cfl1, Cdc42, Spock2, ENSMUSG00000040904, Rps29, Rps24, B2m, Atp6v0c, Rap1a, R…	1619
GO:1901988	negative regulation of cell cycle phase ...	13	2	1.16	0.32522	0.32522	3dpi	BP	NonN_8	GO:1901988	Cacnb4, Rpl24	144	Kcnb2, Rbfox3, Cdh18, Hs3st4, Grik1, Trhde, Dpp6, Sgcd, Pcdh10, Ntrk3, Slc8a3, Pcdh11x, Upp2, Meg3, Samd4, Cntnap2, Tmem132b, Mctp1, Jakmip2, Dner, Cacnb4, Kif26b, D430041D05Rik, Naaladl2, Sgcz, Brinp1, Xkr6, Atp8a2, Stxbp1, Dnajc6, Brinp3, Rps2, Diaph2, Igsf8, Rpsa, Plcl1, Ubc, Ifitm3, Epas1, Cobll1, Rps4x, Actb, Rpl3, Cfl1, Cdc42, Spock2, ENSMUSG00000040904, Rps29, Rps24, B2m, Atp6v0c, Rap1a, R…	1619
GO:1990266	neutrophil migration	13	2	1.16	0.32522	0.32522	3dpi	BP	NonN_8	GO:1990266	Bsg, Ppia	144	Kcnb2, Rbfox3, Cdh18, Hs3st4, Grik1, Trhde, Dpp6, Sgcd, Pcdh10, Ntrk3, Slc8a3, Pcdh11x, Upp2, Meg3, Samd4, Cntnap2, Tmem132b, Mctp1, Jakmip2, Dner, Cacnb4, Kif26b, D430041D05Rik, Naaladl2, Sgcz, Brinp1, Xkr6, Atp8a2, Stxbp1, Dnajc6, Brinp3, Rps2, Diaph2, Igsf8, Rpsa, Plcl1, Ubc, Ifitm3, Epas1, Cobll1, Rps4x, Actb, Rpl3, Cfl1, Cdc42, Spock2, ENSMUSG00000040904, Rps29, Rps24, B2m, Atp6v0c, Rap1a, R…	1619
GO:0032268	regulation of cellular protein metabolic...	244	24	21.76	0.32783	0.86992	3dpi	BP	NonN_8	GO:0032268	Actb, Calm1, Calm2, Cd81, Cfl1, Cst3, Eif1, Epas1, Gstp1, Hsp90ab1, Ndfip1, Ntrk3, Plcl1, Ppia, Rap1a, Rpl11, Rpl23, Rpl38, Rplp1, Rps2, Rps3, Samd4, Slc8a3, Ubb	144	Kcnb2, Rbfox3, Cdh18, Hs3st4, Grik1, Trhde, Dpp6, Sgcd, Pcdh10, Ntrk3, Slc8a3, Pcdh11x, Upp2, Meg3, Samd4, Cntnap2, Tmem132b, Mctp1, Jakmip2, Dner, Cacnb4, Kif26b, D430041D05Rik, Naaladl2, Sgcz, Brinp1, Xkr6, Atp8a2, Stxbp1, Dnajc6, Brinp3, Rps2, Diaph2, Igsf8, Rpsa, Plcl1, Ubc, Ifitm3, Epas1, Cobll1, Rps4x, Actb, Rpl3, Cfl1, Cdc42, Spock2, ENSMUSG00000040904, Rps29, Rps24, B2m, Atp6v0c, Rap1a, R…	1619
GO:0032269	negative regulation of cellular protein ...	105	11	9.36	0.33051	0.33051	3dpi	BP	NonN_8	GO:0032269	Actb, Cst3, Gstp1, Hsp90ab1, Ntrk3, Ppia, Rpl11, Rpl23, Rps3, Samd4, Slc8a3	144	Kcnb2, Rbfox3, Cdh18, Hs3st4, Grik1, Trhde, Dpp6, Sgcd, Pcdh10, Ntrk3, Slc8a3, Pcdh11x, Upp2, Meg3, Samd4, Cntnap2, Tmem132b, Mctp1, Jakmip2, Dner, Cacnb4, Kif26b, D430041D05Rik, Naaladl2, Sgcz, Brinp1, Xkr6, Atp8a2, Stxbp1, Dnajc6, Brinp3, Rps2, Diaph2, Igsf8, Rpsa, Plcl1, Ubc, Ifitm3, Epas1, Cobll1, Rps4x, Actb, Rpl3, Cfl1, Cdc42, Spock2, ENSMUSG00000040904, Rps29, Rps24, B2m, Atp6v0c, Rap1a, R…	1619
GO:1903827	regulation of cellular protein localizat...	84	9	7.49	0.33071	0.33071	3dpi	BP	NonN_8	GO:1903827	Actb, Cacnb4, Cd81, Cdc42, Cfl1, Dpp6, Hsp90ab1, Ptn, Rap1a	144	Kcnb2, Rbfox3, Cdh18, Hs3st4, Grik1, Trhde, Dpp6, Sgcd, Pcdh10, Ntrk3, Slc8a3, Pcdh11x, Upp2, Meg3, Samd4, Cntnap2, Tmem132b, Mctp1, Jakmip2, Dner, Cacnb4, Kif26b, D430041D05Rik, Naaladl2, Sgcz, Brinp1, Xkr6, Atp8a2, Stxbp1, Dnajc6, Brinp3, Rps2, Diaph2, Igsf8, Rpsa, Plcl1, Ubc, Ifitm3, Epas1, Cobll1, Rps4x, Actb, Rpl3, Cfl1, Cdc42, Spock2, ENSMUSG00000040904, Rps29, Rps24, B2m, Atp6v0c, Rap1a, R…	1619
GO:0032412	regulation of ion transmembrane transpor...	53	6	4.73	0.33245	0.33245	3dpi	BP	NonN_8	GO:0032412	Atp1a2, Cacnb4, Calm1, Calm2, Cfl1, Ndufa4	144	Kcnb2, Rbfox3, Cdh18, Hs3st4, Grik1, Trhde, Dpp6, Sgcd, Pcdh10, Ntrk3, Slc8a3, Pcdh11x, Upp2, Meg3, Samd4, Cntnap2, Tmem132b, Mctp1, Jakmip2, Dner, Cacnb4, Kif26b, D430041D05Rik, Naaladl2, Sgcz, Brinp1, Xkr6, Atp8a2, Stxbp1, Dnajc6, Brinp3, Rps2, Diaph2, Igsf8, Rpsa, Plcl1, Ubc, Ifitm3, Epas1, Cobll1, Rps4x, Actb, Rpl3, Cfl1, Cdc42, Spock2, ENSMUSG00000040904, Rps29, Rps24, B2m, Atp6v0c, Rap1a, R…	1619
GO:0048880	sensory system development	53	6	4.73	0.33245	0.33245	3dpi	BP	NonN_8	GO:0048880	Atp8a2, Bsg, Ntrk3, Pfdn5, Ptn, Rpl24	144	Kcnb2, Rbfox3, Cdh18, Hs3st4, Grik1, Trhde, Dpp6, Sgcd, Pcdh10, Ntrk3, Slc8a3, Pcdh11x, Upp2, Meg3, Samd4, Cntnap2, Tmem132b, Mctp1, Jakmip2, Dner, Cacnb4, Kif26b, D430041D05Rik, Naaladl2, Sgcz, Brinp1, Xkr6, Atp8a2, Stxbp1, Dnajc6, Brinp3, Rps2, Diaph2, Igsf8, Rpsa, Plcl1, Ubc, Ifitm3, Epas1, Cobll1, Rps4x, Actb, Rpl3, Cfl1, Cdc42, Spock2, ENSMUSG00000040904, Rps29, Rps24, B2m, Atp6v0c, Rap1a, R…	1619
GO:0150063	visual system development	53	6	4.73	0.33245	0.33245	3dpi	BP	NonN_8	GO:0150063	Atp8a2, Bsg, Ntrk3, Pfdn5, Ptn, Rpl24	144	Kcnb2, Rbfox3, Cdh18, Hs3st4, Grik1, Trhde, Dpp6, Sgcd, Pcdh10, Ntrk3, Slc8a3, Pcdh11x, Upp2, Meg3, Samd4, Cntnap2, Tmem132b, Mctp1, Jakmip2, Dner, Cacnb4, Kif26b, D430041D05Rik, Naaladl2, Sgcz, Brinp1, Xkr6, Atp8a2, Stxbp1, Dnajc6, Brinp3, Rps2, Diaph2, Igsf8, Rpsa, Plcl1, Ubc, Ifitm3, Epas1, Cobll1, Rps4x, Actb, Rpl3, Cfl1, Cdc42, Spock2, ENSMUSG00000040904, Rps29, Rps24, B2m, Atp6v0c, Rap1a, R…	1619
GO:0031399	regulation of protein modification proce...	180	18	16.05	0.33431	0.93950	3dpi	BP	NonN_8	GO:0031399	Actb, Calm1, Calm2, Cd81, Epas1, Gstp1, Hsp90ab1, Ndfip1, Ntrk3, Plcl1, Ppia, Rap1a, Rpl11, Rpl23, Rps2, Rps3, Slc8a3, Ubb	144	Kcnb2, Rbfox3, Cdh18, Hs3st4, Grik1, Trhde, Dpp6, Sgcd, Pcdh10, Ntrk3, Slc8a3, Pcdh11x, Upp2, Meg3, Samd4, Cntnap2, Tmem132b, Mctp1, Jakmip2, Dner, Cacnb4, Kif26b, D430041D05Rik, Naaladl2, Sgcz, Brinp1, Xkr6, Atp8a2, Stxbp1, Dnajc6, Brinp3, Rps2, Diaph2, Igsf8, Rpsa, Plcl1, Ubc, Ifitm3, Epas1, Cobll1, Rps4x, Actb, Rpl3, Cfl1, Cdc42, Spock2, ENSMUSG00000040904, Rps29, Rps24, B2m, Atp6v0c, Rap1a, R…	1619
GO:0045860	positive regulation of protein kinase ac...	43	5	3.83	0.33636	0.33636	3dpi	BP	NonN_8	GO:0045860	Hsp90ab1, Ntrk3, Ppia, Rap1a, Rps3	144	Kcnb2, Rbfox3, Cdh18, Hs3st4, Grik1, Trhde, Dpp6, Sgcd, Pcdh10, Ntrk3, Slc8a3, Pcdh11x, Upp2, Meg3, Samd4, Cntnap2, Tmem132b, Mctp1, Jakmip2, Dner, Cacnb4, Kif26b, D430041D05Rik, Naaladl2, Sgcz, Brinp1, Xkr6, Atp8a2, Stxbp1, Dnajc6, Brinp3, Rps2, Diaph2, Igsf8, Rpsa, Plcl1, Ubc, Ifitm3, Epas1, Cobll1, Rps4x, Actb, Rpl3, Cfl1, Cdc42, Spock2, ENSMUSG00000040904, Rps29, Rps24, B2m, Atp6v0c, Rap1a, R…	1619
GO:0002460	adaptive immune response based on somati...	23	3	2.05	0.33746	0.33746	3dpi	BP	NonN_8	GO:0002460	B2m, Cd81, Ndfip1	144	Kcnb2, Rbfox3, Cdh18, Hs3st4, Grik1, Trhde, Dpp6, Sgcd, Pcdh10, Ntrk3, Slc8a3, Pcdh11x, Upp2, Meg3, Samd4, Cntnap2, Tmem132b, Mctp1, Jakmip2, Dner, Cacnb4, Kif26b, D430041D05Rik, Naaladl2, Sgcz, Brinp1, Xkr6, Atp8a2, Stxbp1, Dnajc6, Brinp3, Rps2, Diaph2, Igsf8, Rpsa, Plcl1, Ubc, Ifitm3, Epas1, Cobll1, Rps4x, Actb, Rpl3, Cfl1, Cdc42, Spock2, ENSMUSG00000040904, Rps29, Rps24, B2m, Atp6v0c, Rap1a, R…	1619
GO:0006790	sulfur compound metabolic process	23	3	2.05	0.33746	0.33746	3dpi	BP	NonN_8	GO:0006790	Gpx4, Gstp1, Spock2	144	Kcnb2, Rbfox3, Cdh18, Hs3st4, Grik1, Trhde, Dpp6, Sgcd, Pcdh10, Ntrk3, Slc8a3, Pcdh11x, Upp2, Meg3, Samd4, Cntnap2, Tmem132b, Mctp1, Jakmip2, Dner, Cacnb4, Kif26b, D430041D05Rik, Naaladl2, Sgcz, Brinp1, Xkr6, Atp8a2, Stxbp1, Dnajc6, Brinp3, Rps2, Diaph2, Igsf8, Rpsa, Plcl1, Ubc, Ifitm3, Epas1, Cobll1, Rps4x, Actb, Rpl3, Cfl1, Cdc42, Spock2, ENSMUSG00000040904, Rps29, Rps24, B2m, Atp6v0c, Rap1a, R…	1619
GO:0008360	regulation of cell shape	23	3	2.05	0.33746	0.33746	3dpi	BP	NonN_8	GO:0008360	Aldoa, Cfl1, Ptn	144	Kcnb2, Rbfox3, Cdh18, Hs3st4, Grik1, Trhde, Dpp6, Sgcd, Pcdh10, Ntrk3, Slc8a3, Pcdh11x, Upp2, Meg3, Samd4, Cntnap2, Tmem132b, Mctp1, Jakmip2, Dner, Cacnb4, Kif26b, D430041D05Rik, Naaladl2, Sgcz, Brinp1, Xkr6, Atp8a2, Stxbp1, Dnajc6, Brinp3, Rps2, Diaph2, Igsf8, Rpsa, Plcl1, Ubc, Ifitm3, Epas1, Cobll1, Rps4x, Actb, Rpl3, Cfl1, Cdc42, Spock2, ENSMUSG00000040904, Rps29, Rps24, B2m, Atp6v0c, Rap1a, R…	1619
GO:0021954	central nervous system neuron developmen...	23	3	2.05	0.33746	0.33746	3dpi	BP	NonN_8	GO:0021954	Hsp90ab1, Ubb, Uqcrq	144	Kcnb2, Rbfox3, Cdh18, Hs3st4, Grik1, Trhde, Dpp6, Sgcd, Pcdh10, Ntrk3, Slc8a3, Pcdh11x, Upp2, Meg3, Samd4, Cntnap2, Tmem132b, Mctp1, Jakmip2, Dner, Cacnb4, Kif26b, D430041D05Rik, Naaladl2, Sgcz, Brinp1, Xkr6, Atp8a2, Stxbp1, Dnajc6, Brinp3, Rps2, Diaph2, Igsf8, Rpsa, Plcl1, Ubc, Ifitm3, Epas1, Cobll1, Rps4x, Actb, Rpl3, Cfl1, Cdc42, Spock2, ENSMUSG00000040904, Rps29, Rps24, B2m, Atp6v0c, Rap1a, R…	1619
GO:0050680	negative regulation of epithelial cell p...	23	3	2.05	0.33746	0.33746	3dpi	BP	NonN_8	GO:0050680	B2m, Ptn, Sparc	144	Kcnb2, Rbfox3, Cdh18, Hs3st4, Grik1, Trhde, Dpp6, Sgcd, Pcdh10, Ntrk3, Slc8a3, Pcdh11x, Upp2, Meg3, Samd4, Cntnap2, Tmem132b, Mctp1, Jakmip2, Dner, Cacnb4, Kif26b, D430041D05Rik, Naaladl2, Sgcz, Brinp1, Xkr6, Atp8a2, Stxbp1, Dnajc6, Brinp3, Rps2, Diaph2, Igsf8, Rpsa, Plcl1, Ubc, Ifitm3, Epas1, Cobll1, Rps4x, Actb, Rpl3, Cfl1, Cdc42, Spock2, ENSMUSG00000040904, Rps29, Rps24, B2m, Atp6v0c, Rap1a, R…	1619
GO:0050805	negative regulation of synaptic transmis...	23	3	2.05	0.33746	0.33746	3dpi	BP	NonN_8	GO:0050805	Grik1, Rap1a, Stxbp1	144	Kcnb2, Rbfox3, Cdh18, Hs3st4, Grik1, Trhde, Dpp6, Sgcd, Pcdh10, Ntrk3, Slc8a3, Pcdh11x, Upp2, Meg3, Samd4, Cntnap2, Tmem132b, Mctp1, Jakmip2, Dner, Cacnb4, Kif26b, D430041D05Rik, Naaladl2, Sgcz, Brinp1, Xkr6, Atp8a2, Stxbp1, Dnajc6, Brinp3, Rps2, Diaph2, Igsf8, Rpsa, Plcl1, Ubc, Ifitm3, Epas1, Cobll1, Rps4x, Actb, Rpl3, Cfl1, Cdc42, Spock2, ENSMUSG00000040904, Rps29, Rps24, B2m, Atp6v0c, Rap1a, R…	1619
GO:0060079	excitatory postsynaptic potential	23	3	2.05	0.33746	0.33746	3dpi	BP	NonN_8	GO:0060079	Cntnap2, Grik1, Slc8a3	144	Kcnb2, Rbfox3, Cdh18, Hs3st4, Grik1, Trhde, Dpp6, Sgcd, Pcdh10, Ntrk3, Slc8a3, Pcdh11x, Upp2, Meg3, Samd4, Cntnap2, Tmem132b, Mctp1, Jakmip2, Dner, Cacnb4, Kif26b, D430041D05Rik, Naaladl2, Sgcz, Brinp1, Xkr6, Atp8a2, Stxbp1, Dnajc6, Brinp3, Rps2, Diaph2, Igsf8, Rpsa, Plcl1, Ubc, Ifitm3, Epas1, Cobll1, Rps4x, Actb, Rpl3, Cfl1, Cdc42, Spock2, ENSMUSG00000040904, Rps29, Rps24, B2m, Atp6v0c, Rap1a, R…	1619
GO:0002253	activation of immune response	33	4	2.94	0.33873	0.33873	3dpi	BP	NonN_8	GO:0002253	Cacnb4, Cd81, Rap1a, Rps3	144	Kcnb2, Rbfox3, Cdh18, Hs3st4, Grik1, Trhde, Dpp6, Sgcd, Pcdh10, Ntrk3, Slc8a3, Pcdh11x, Upp2, Meg3, Samd4, Cntnap2, Tmem132b, Mctp1, Jakmip2, Dner, Cacnb4, Kif26b, D430041D05Rik, Naaladl2, Sgcz, Brinp1, Xkr6, Atp8a2, Stxbp1, Dnajc6, Brinp3, Rps2, Diaph2, Igsf8, Rpsa, Plcl1, Ubc, Ifitm3, Epas1, Cobll1, Rps4x, Actb, Rpl3, Cfl1, Cdc42, Spock2, ENSMUSG00000040904, Rps29, Rps24, B2m, Atp6v0c, Rap1a, R…	1619
GO:0010876	lipid localization	33	4	2.94	0.33873	0.33873	3dpi	BP	NonN_8	GO:0010876	Atp5j, Atp8a2, Pltp, Xkr6	144	Kcnb2, Rbfox3, Cdh18, Hs3st4, Grik1, Trhde, Dpp6, Sgcd, Pcdh10, Ntrk3, Slc8a3, Pcdh11x, Upp2, Meg3, Samd4, Cntnap2, Tmem132b, Mctp1, Jakmip2, Dner, Cacnb4, Kif26b, D430041D05Rik, Naaladl2, Sgcz, Brinp1, Xkr6, Atp8a2, Stxbp1, Dnajc6, Brinp3, Rps2, Diaph2, Igsf8, Rpsa, Plcl1, Ubc, Ifitm3, Epas1, Cobll1, Rps4x, Actb, Rpl3, Cfl1, Cdc42, Spock2, ENSMUSG00000040904, Rps29, Rps24, B2m, Atp6v0c, Rap1a, R…	1619
GO:0019722	calcium-mediated signaling	33	4	2.94	0.33873	0.33873	3dpi	BP	NonN_8	GO:0019722	Calm1, Calm2, Hint1, Sgcd	144	Kcnb2, Rbfox3, Cdh18, Hs3st4, Grik1, Trhde, Dpp6, Sgcd, Pcdh10, Ntrk3, Slc8a3, Pcdh11x, Upp2, Meg3, Samd4, Cntnap2, Tmem132b, Mctp1, Jakmip2, Dner, Cacnb4, Kif26b, D430041D05Rik, Naaladl2, Sgcz, Brinp1, Xkr6, Atp8a2, Stxbp1, Dnajc6, Brinp3, Rps2, Diaph2, Igsf8, Rpsa, Plcl1, Ubc, Ifitm3, Epas1, Cobll1, Rps4x, Actb, Rpl3, Cfl1, Cdc42, Spock2, ENSMUSG00000040904, Rps29, Rps24, B2m, Atp6v0c, Rap1a, R…	1619
GO:0030010	establishment of cell polarity	33	4	2.94	0.33873	0.33873	3dpi	BP	NonN_8	GO:0030010	Cdc42, Cfl1, Hsp90ab1, Kif26b	144	Kcnb2, Rbfox3, Cdh18, Hs3st4, Grik1, Trhde, Dpp6, Sgcd, Pcdh10, Ntrk3, Slc8a3, Pcdh11x, Upp2, Meg3, Samd4, Cntnap2, Tmem132b, Mctp1, Jakmip2, Dner, Cacnb4, Kif26b, D430041D05Rik, Naaladl2, Sgcz, Brinp1, Xkr6, Atp8a2, Stxbp1, Dnajc6, Brinp3, Rps2, Diaph2, Igsf8, Rpsa, Plcl1, Ubc, Ifitm3, Epas1, Cobll1, Rps4x, Actb, Rpl3, Cfl1, Cdc42, Spock2, ENSMUSG00000040904, Rps29, Rps24, B2m, Atp6v0c, Rap1a, R…	1619
GO:0043271	negative regulation of ion transport	33	4	2.94	0.33873	0.33873	3dpi	BP	NonN_8	GO:0043271	Atp1a2, Atp5j, Calm1, Calm2	144	Kcnb2, Rbfox3, Cdh18, Hs3st4, Grik1, Trhde, Dpp6, Sgcd, Pcdh10, Ntrk3, Slc8a3, Pcdh11x, Upp2, Meg3, Samd4, Cntnap2, Tmem132b, Mctp1, Jakmip2, Dner, Cacnb4, Kif26b, D430041D05Rik, Naaladl2, Sgcz, Brinp1, Xkr6, Atp8a2, Stxbp1, Dnajc6, Brinp3, Rps2, Diaph2, Igsf8, Rpsa, Plcl1, Ubc, Ifitm3, Epas1, Cobll1, Rps4x, Actb, Rpl3, Cfl1, Cdc42, Spock2, ENSMUSG00000040904, Rps29, Rps24, B2m, Atp6v0c, Rap1a, R…	1619
GO:0045861	negative regulation of proteolysis	33	4	2.94	0.33873	0.33873	3dpi	BP	NonN_8	GO:0045861	Cst3, Hsp90ab1, Rpl11, Rpl23	144	Kcnb2, Rbfox3, Cdh18, Hs3st4, Grik1, Trhde, Dpp6, Sgcd, Pcdh10, Ntrk3, Slc8a3, Pcdh11x, Upp2, Meg3, Samd4, Cntnap2, Tmem132b, Mctp1, Jakmip2, Dner, Cacnb4, Kif26b, D430041D05Rik, Naaladl2, Sgcz, Brinp1, Xkr6, Atp8a2, Stxbp1, Dnajc6, Brinp3, Rps2, Diaph2, Igsf8, Rpsa, Plcl1, Ubc, Ifitm3, Epas1, Cobll1, Rps4x, Actb, Rpl3, Cfl1, Cdc42, Spock2, ENSMUSG00000040904, Rps29, Rps24, B2m, Atp6v0c, Rap1a, R…	1619
GO:0060491	regulation of cell projection assembly	33	4	2.94	0.33873	0.33873	3dpi	BP	NonN_8	GO:0060491	Cdc42, Cfl1, Dynll1, Septin7	144	Kcnb2, Rbfox3, Cdh18, Hs3st4, Grik1, Trhde, Dpp6, Sgcd, Pcdh10, Ntrk3, Slc8a3, Pcdh11x, Upp2, Meg3, Samd4, Cntnap2, Tmem132b, Mctp1, Jakmip2, Dner, Cacnb4, Kif26b, D430041D05Rik, Naaladl2, Sgcz, Brinp1, Xkr6, Atp8a2, Stxbp1, Dnajc6, Brinp3, Rps2, Diaph2, Igsf8, Rpsa, Plcl1, Ubc, Ifitm3, Epas1, Cobll1, Rps4x, Actb, Rpl3, Cfl1, Cdc42, Spock2, ENSMUSG00000040904, Rps29, Rps24, B2m, Atp6v0c, Rap1a, R…	1619
GO:0070661	leukocyte proliferation	33	4	2.94	0.33873	0.33873	3dpi	BP	NonN_8	GO:0070661	Cd81, Gstp1, Ndfip1, Rps3	144	Kcnb2, Rbfox3, Cdh18, Hs3st4, Grik1, Trhde, Dpp6, Sgcd, Pcdh10, Ntrk3, Slc8a3, Pcdh11x, Upp2, Meg3, Samd4, Cntnap2, Tmem132b, Mctp1, Jakmip2, Dner, Cacnb4, Kif26b, D430041D05Rik, Naaladl2, Sgcz, Brinp1, Xkr6, Atp8a2, Stxbp1, Dnajc6, Brinp3, Rps2, Diaph2, Igsf8, Rpsa, Plcl1, Ubc, Ifitm3, Epas1, Cobll1, Rps4x, Actb, Rpl3, Cfl1, Cdc42, Spock2, ENSMUSG00000040904, Rps29, Rps24, B2m, Atp6v0c, Rap1a, R…	1619
GO:0120032	regulation of plasma membrane bounded ce...	33	4	2.94	0.33873	0.33873	3dpi	BP	NonN_8	GO:0120032	Cdc42, Cfl1, Dynll1, Septin7	144	Kcnb2, Rbfox3, Cdh18, Hs3st4, Grik1, Trhde, Dpp6, Sgcd, Pcdh10, Ntrk3, Slc8a3, Pcdh11x, Upp2, Meg3, Samd4, Cntnap2, Tmem132b, Mctp1, Jakmip2, Dner, Cacnb4, Kif26b, D430041D05Rik, Naaladl2, Sgcz, Brinp1, Xkr6, Atp8a2, Stxbp1, Dnajc6, Brinp3, Rps2, Diaph2, Igsf8, Rpsa, Plcl1, Ubc, Ifitm3, Epas1, Cobll1, Rps4x, Actb, Rpl3, Cfl1, Cdc42, Spock2, ENSMUSG00000040904, Rps29, Rps24, B2m, Atp6v0c, Rap1a, R…	1619
GO:1903169	regulation of calcium ion transmembrane ...	33	4	2.94	0.33873	0.33873	3dpi	BP	NonN_8	GO:1903169	Atp1a2, Cacnb4, Calm1, Calm2	144	Kcnb2, Rbfox3, Cdh18, Hs3st4, Grik1, Trhde, Dpp6, Sgcd, Pcdh10, Ntrk3, Slc8a3, Pcdh11x, Upp2, Meg3, Samd4, Cntnap2, Tmem132b, Mctp1, Jakmip2, Dner, Cacnb4, Kif26b, D430041D05Rik, Naaladl2, Sgcz, Brinp1, Xkr6, Atp8a2, Stxbp1, Dnajc6, Brinp3, Rps2, Diaph2, Igsf8, Rpsa, Plcl1, Ubc, Ifitm3, Epas1, Cobll1, Rps4x, Actb, Rpl3, Cfl1, Cdc42, Spock2, ENSMUSG00000040904, Rps29, Rps24, B2m, Atp6v0c, Rap1a, R…	1619
GO:0045927	positive regulation of growth	54	6	4.82	0.34901	0.34901	3dpi	BP	NonN_8	GO:0045927	Atp8a2, Cd81, Cdc42, Cfl1, H3f3b, Ntrk3	144	Kcnb2, Rbfox3, Cdh18, Hs3st4, Grik1, Trhde, Dpp6, Sgcd, Pcdh10, Ntrk3, Slc8a3, Pcdh11x, Upp2, Meg3, Samd4, Cntnap2, Tmem132b, Mctp1, Jakmip2, Dner, Cacnb4, Kif26b, D430041D05Rik, Naaladl2, Sgcz, Brinp1, Xkr6, Atp8a2, Stxbp1, Dnajc6, Brinp3, Rps2, Diaph2, Igsf8, Rpsa, Plcl1, Ubc, Ifitm3, Epas1, Cobll1, Rps4x, Actb, Rpl3, Cfl1, Cdc42, Spock2, ENSMUSG00000040904, Rps29, Rps24, B2m, Atp6v0c, Rap1a, R…	1619
GO:0060341	regulation of cellular localization	128	13	11.41	0.35039	0.35039	3dpi	BP	NonN_8	GO:0060341	Actb, Cacnb4, Calm1, Calm2, Cd81, Cdc42, Cfl1, Dpp6, Hsp90ab1, Pde8b, Ptn, Rap1a, Stxbp1	144	Kcnb2, Rbfox3, Cdh18, Hs3st4, Grik1, Trhde, Dpp6, Sgcd, Pcdh10, Ntrk3, Slc8a3, Pcdh11x, Upp2, Meg3, Samd4, Cntnap2, Tmem132b, Mctp1, Jakmip2, Dner, Cacnb4, Kif26b, D430041D05Rik, Naaladl2, Sgcz, Brinp1, Xkr6, Atp8a2, Stxbp1, Dnajc6, Brinp3, Rps2, Diaph2, Igsf8, Rpsa, Plcl1, Ubc, Ifitm3, Epas1, Cobll1, Rps4x, Actb, Rpl3, Cfl1, Cdc42, Spock2, ENSMUSG00000040904, Rps29, Rps24, B2m, Atp6v0c, Rap1a, R…	1619
GO:0098660	inorganic ion transmembrane transport	107	11	9.54	0.35423	0.35423	3dpi	BP	NonN_8	GO:0098660	Atp1a2, Atp5j, Atp5j2, Atp6v0c, Cacnb4, Calm1, Calm2, Dpp6, Kcnb2, Ndufa4, Slc8a3	144	Kcnb2, Rbfox3, Cdh18, Hs3st4, Grik1, Trhde, Dpp6, Sgcd, Pcdh10, Ntrk3, Slc8a3, Pcdh11x, Upp2, Meg3, Samd4, Cntnap2, Tmem132b, Mctp1, Jakmip2, Dner, Cacnb4, Kif26b, D430041D05Rik, Naaladl2, Sgcz, Brinp1, Xkr6, Atp8a2, Stxbp1, Dnajc6, Brinp3, Rps2, Diaph2, Igsf8, Rpsa, Plcl1, Ubc, Ifitm3, Epas1, Cobll1, Rps4x, Actb, Rpl3, Cfl1, Cdc42, Spock2, ENSMUSG00000040904, Rps29, Rps24, B2m, Atp6v0c, Rap1a, R…	1619
GO:0007005	mitochondrion organization	44	5	3.92	0.35482	0.35482	3dpi	BP	NonN_8	GO:0007005	Calm1, Chchd2, Cox7a2, Epas1, Ndufc2	144	Kcnb2, Rbfox3, Cdh18, Hs3st4, Grik1, Trhde, Dpp6, Sgcd, Pcdh10, Ntrk3, Slc8a3, Pcdh11x, Upp2, Meg3, Samd4, Cntnap2, Tmem132b, Mctp1, Jakmip2, Dner, Cacnb4, Kif26b, D430041D05Rik, Naaladl2, Sgcz, Brinp1, Xkr6, Atp8a2, Stxbp1, Dnajc6, Brinp3, Rps2, Diaph2, Igsf8, Rpsa, Plcl1, Ubc, Ifitm3, Epas1, Cobll1, Rps4x, Actb, Rpl3, Cfl1, Cdc42, Spock2, ENSMUSG00000040904, Rps29, Rps24, B2m, Atp6v0c, Rap1a, R…	1619
GO:0010608	posttranscriptional regulation of gene e...	44	5	3.92	0.35482	0.35482	3dpi	BP	NonN_8	GO:0010608	Eif1, Rpl38, Rplp1, Rps3, Samd4	144	Kcnb2, Rbfox3, Cdh18, Hs3st4, Grik1, Trhde, Dpp6, Sgcd, Pcdh10, Ntrk3, Slc8a3, Pcdh11x, Upp2, Meg3, Samd4, Cntnap2, Tmem132b, Mctp1, Jakmip2, Dner, Cacnb4, Kif26b, D430041D05Rik, Naaladl2, Sgcz, Brinp1, Xkr6, Atp8a2, Stxbp1, Dnajc6, Brinp3, Rps2, Diaph2, Igsf8, Rpsa, Plcl1, Ubc, Ifitm3, Epas1, Cobll1, Rps4x, Actb, Rpl3, Cfl1, Cdc42, Spock2, ENSMUSG00000040904, Rps29, Rps24, B2m, Atp6v0c, Rap1a, R…	1619
GO:0048568	embryonic organ development	44	5	3.92	0.35482	0.35482	3dpi	BP	NonN_8	GO:0048568	Atp8a2, Cdc42, Cntnap2, Epas1, Rpl38	144	Kcnb2, Rbfox3, Cdh18, Hs3st4, Grik1, Trhde, Dpp6, Sgcd, Pcdh10, Ntrk3, Slc8a3, Pcdh11x, Upp2, Meg3, Samd4, Cntnap2, Tmem132b, Mctp1, Jakmip2, Dner, Cacnb4, Kif26b, D430041D05Rik, Naaladl2, Sgcz, Brinp1, Xkr6, Atp8a2, Stxbp1, Dnajc6, Brinp3, Rps2, Diaph2, Igsf8, Rpsa, Plcl1, Ubc, Ifitm3, Epas1, Cobll1, Rps4x, Actb, Rpl3, Cfl1, Cdc42, Spock2, ENSMUSG00000040904, Rps29, Rps24, B2m, Atp6v0c, Rap1a, R…	1619
GO:0007611	learning or memory	65	7	5.8	0.35816	0.35816	3dpi	BP	NonN_8	GO:0007611	Atp1a2, B2m, Brinp1, Cntnap2, Pde8b, Ptn, Slc8a3	144	Kcnb2, Rbfox3, Cdh18, Hs3st4, Grik1, Trhde, Dpp6, Sgcd, Pcdh10, Ntrk3, Slc8a3, Pcdh11x, Upp2, Meg3, Samd4, Cntnap2, Tmem132b, Mctp1, Jakmip2, Dner, Cacnb4, Kif26b, D430041D05Rik, Naaladl2, Sgcz, Brinp1, Xkr6, Atp8a2, Stxbp1, Dnajc6, Brinp3, Rps2, Diaph2, Igsf8, Rpsa, Plcl1, Ubc, Ifitm3, Epas1, Cobll1, Rps4x, Actb, Rpl3, Cfl1, Cdc42, Spock2, ENSMUSG00000040904, Rps29, Rps24, B2m, Atp6v0c, Rap1a, R…	1619
GO:0001738	morphogenesis of a polarized epithelium	14	2	1.25	0.35909	0.35909	3dpi	BP	NonN_8	GO:0001738	Actb, Cdc42	144	Kcnb2, Rbfox3, Cdh18, Hs3st4, Grik1, Trhde, Dpp6, Sgcd, Pcdh10, Ntrk3, Slc8a3, Pcdh11x, Upp2, Meg3, Samd4, Cntnap2, Tmem132b, Mctp1, Jakmip2, Dner, Cacnb4, Kif26b, D430041D05Rik, Naaladl2, Sgcz, Brinp1, Xkr6, Atp8a2, Stxbp1, Dnajc6, Brinp3, Rps2, Diaph2, Igsf8, Rpsa, Plcl1, Ubc, Ifitm3, Epas1, Cobll1, Rps4x, Actb, Rpl3, Cfl1, Cdc42, Spock2, ENSMUSG00000040904, Rps29, Rps24, B2m, Atp6v0c, Rap1a, R…	1619
GO:0006260	DNA replication	14	2	1.25	0.35909	0.35909	3dpi	BP	NonN_8	GO:0006260	Cdc42, Cst3	144	Kcnb2, Rbfox3, Cdh18, Hs3st4, Grik1, Trhde, Dpp6, Sgcd, Pcdh10, Ntrk3, Slc8a3, Pcdh11x, Upp2, Meg3, Samd4, Cntnap2, Tmem132b, Mctp1, Jakmip2, Dner, Cacnb4, Kif26b, D430041D05Rik, Naaladl2, Sgcz, Brinp1, Xkr6, Atp8a2, Stxbp1, Dnajc6, Brinp3, Rps2, Diaph2, Igsf8, Rpsa, Plcl1, Ubc, Ifitm3, Epas1, Cobll1, Rps4x, Actb, Rpl3, Cfl1, Cdc42, Spock2, ENSMUSG00000040904, Rps29, Rps24, B2m, Atp6v0c, Rap1a, R…	1619
GO:0008584	male gonad development	14	2	1.25	0.35909	0.35909	3dpi	BP	NonN_8	GO:0008584	H3f3b, Ubb	144	Kcnb2, Rbfox3, Cdh18, Hs3st4, Grik1, Trhde, Dpp6, Sgcd, Pcdh10, Ntrk3, Slc8a3, Pcdh11x, Upp2, Meg3, Samd4, Cntnap2, Tmem132b, Mctp1, Jakmip2, Dner, Cacnb4, Kif26b, D430041D05Rik, Naaladl2, Sgcz, Brinp1, Xkr6, Atp8a2, Stxbp1, Dnajc6, Brinp3, Rps2, Diaph2, Igsf8, Rpsa, Plcl1, Ubc, Ifitm3, Epas1, Cobll1, Rps4x, Actb, Rpl3, Cfl1, Cdc42, Spock2, ENSMUSG00000040904, Rps29, Rps24, B2m, Atp6v0c, Rap1a, R…	1619
GO:0014902	myotube differentiation	14	2	1.25	0.35909	0.35909	3dpi	BP	NonN_8	GO:0014902	Cd81, Dner	144	Kcnb2, Rbfox3, Cdh18, Hs3st4, Grik1, Trhde, Dpp6, Sgcd, Pcdh10, Ntrk3, Slc8a3, Pcdh11x, Upp2, Meg3, Samd4, Cntnap2, Tmem132b, Mctp1, Jakmip2, Dner, Cacnb4, Kif26b, D430041D05Rik, Naaladl2, Sgcz, Brinp1, Xkr6, Atp8a2, Stxbp1, Dnajc6, Brinp3, Rps2, Diaph2, Igsf8, Rpsa, Plcl1, Ubc, Ifitm3, Epas1, Cobll1, Rps4x, Actb, Rpl3, Cfl1, Cdc42, Spock2, ENSMUSG00000040904, Rps29, Rps24, B2m, Atp6v0c, Rap1a, R…	1619
GO:0016525	negative regulation of angiogenesis	14	2	1.25	0.35909	0.35909	3dpi	BP	NonN_8	GO:0016525	Ptn, Sparc	144	Kcnb2, Rbfox3, Cdh18, Hs3st4, Grik1, Trhde, Dpp6, Sgcd, Pcdh10, Ntrk3, Slc8a3, Pcdh11x, Upp2, Meg3, Samd4, Cntnap2, Tmem132b, Mctp1, Jakmip2, Dner, Cacnb4, Kif26b, D430041D05Rik, Naaladl2, Sgcz, Brinp1, Xkr6, Atp8a2, Stxbp1, Dnajc6, Brinp3, Rps2, Diaph2, Igsf8, Rpsa, Plcl1, Ubc, Ifitm3, Epas1, Cobll1, Rps4x, Actb, Rpl3, Cfl1, Cdc42, Spock2, ENSMUSG00000040904, Rps29, Rps24, B2m, Atp6v0c, Rap1a, R…	1619
GO:0030837	negative regulation of actin filament po...	14	2	1.25	0.35909	0.35909	3dpi	BP	NonN_8	GO:0030837	Cfl1, Tmsb10	144	Kcnb2, Rbfox3, Cdh18, Hs3st4, Grik1, Trhde, Dpp6, Sgcd, Pcdh10, Ntrk3, Slc8a3, Pcdh11x, Upp2, Meg3, Samd4, Cntnap2, Tmem132b, Mctp1, Jakmip2, Dner, Cacnb4, Kif26b, D430041D05Rik, Naaladl2, Sgcz, Brinp1, Xkr6, Atp8a2, Stxbp1, Dnajc6, Brinp3, Rps2, Diaph2, Igsf8, Rpsa, Plcl1, Ubc, Ifitm3, Epas1, Cobll1, Rps4x, Actb, Rpl3, Cfl1, Cdc42, Spock2, ENSMUSG00000040904, Rps29, Rps24, B2m, Atp6v0c, Rap1a, R…	1619
GO:0032200	telomere organization	14	2	1.25	0.35909	0.35909	3dpi	BP	NonN_8	GO:0032200	H3f3b, Hsp90ab1	144	Kcnb2, Rbfox3, Cdh18, Hs3st4, Grik1, Trhde, Dpp6, Sgcd, Pcdh10, Ntrk3, Slc8a3, Pcdh11x, Upp2, Meg3, Samd4, Cntnap2, Tmem132b, Mctp1, Jakmip2, Dner, Cacnb4, Kif26b, D430041D05Rik, Naaladl2, Sgcz, Brinp1, Xkr6, Atp8a2, Stxbp1, Dnajc6, Brinp3, Rps2, Diaph2, Igsf8, Rpsa, Plcl1, Ubc, Ifitm3, Epas1, Cobll1, Rps4x, Actb, Rpl3, Cfl1, Cdc42, Spock2, ENSMUSG00000040904, Rps29, Rps24, B2m, Atp6v0c, Rap1a, R…	1619
GO:0032946	positive regulation of mononuclear cell ...	14	2	1.25	0.35909	0.35909	3dpi	BP	NonN_8	GO:0032946	Cd81, Rps3	144	Kcnb2, Rbfox3, Cdh18, Hs3st4, Grik1, Trhde, Dpp6, Sgcd, Pcdh10, Ntrk3, Slc8a3, Pcdh11x, Upp2, Meg3, Samd4, Cntnap2, Tmem132b, Mctp1, Jakmip2, Dner, Cacnb4, Kif26b, D430041D05Rik, Naaladl2, Sgcz, Brinp1, Xkr6, Atp8a2, Stxbp1, Dnajc6, Brinp3, Rps2, Diaph2, Igsf8, Rpsa, Plcl1, Ubc, Ifitm3, Epas1, Cobll1, Rps4x, Actb, Rpl3, Cfl1, Cdc42, Spock2, ENSMUSG00000040904, Rps29, Rps24, B2m, Atp6v0c, Rap1a, R…	1619
GO:0035176	social behavior	14	2	1.25	0.35909	0.35909	3dpi	BP	NonN_8	GO:0035176	Brinp1, Cntnap2	144	Kcnb2, Rbfox3, Cdh18, Hs3st4, Grik1, Trhde, Dpp6, Sgcd, Pcdh10, Ntrk3, Slc8a3, Pcdh11x, Upp2, Meg3, Samd4, Cntnap2, Tmem132b, Mctp1, Jakmip2, Dner, Cacnb4, Kif26b, D430041D05Rik, Naaladl2, Sgcz, Brinp1, Xkr6, Atp8a2, Stxbp1, Dnajc6, Brinp3, Rps2, Diaph2, Igsf8, Rpsa, Plcl1, Ubc, Ifitm3, Epas1, Cobll1, Rps4x, Actb, Rpl3, Cfl1, Cdc42, Spock2, ENSMUSG00000040904, Rps29, Rps24, B2m, Atp6v0c, Rap1a, R…	1619
GO:0040029	regulation of gene expression, epigeneti...	14	2	1.25	0.35909	0.35909	3dpi	BP	NonN_8	GO:0040029	Eif1, H3f3b	144	Kcnb2, Rbfox3, Cdh18, Hs3st4, Grik1, Trhde, Dpp6, Sgcd, Pcdh10, Ntrk3, Slc8a3, Pcdh11x, Upp2, Meg3, Samd4, Cntnap2, Tmem132b, Mctp1, Jakmip2, Dner, Cacnb4, Kif26b, D430041D05Rik, Naaladl2, Sgcz, Brinp1, Xkr6, Atp8a2, Stxbp1, Dnajc6, Brinp3, Rps2, Diaph2, Igsf8, Rpsa, Plcl1, Ubc, Ifitm3, Epas1, Cobll1, Rps4x, Actb, Rpl3, Cfl1, Cdc42, Spock2, ENSMUSG00000040904, Rps29, Rps24, B2m, Atp6v0c, Rap1a, R…	1619
GO:0044839	cell cycle G2/M phase transition	14	2	1.25	0.35909	0.35909	3dpi	BP	NonN_8	GO:0044839	Calm1, Calm2	144	Kcnb2, Rbfox3, Cdh18, Hs3st4, Grik1, Trhde, Dpp6, Sgcd, Pcdh10, Ntrk3, Slc8a3, Pcdh11x, Upp2, Meg3, Samd4, Cntnap2, Tmem132b, Mctp1, Jakmip2, Dner, Cacnb4, Kif26b, D430041D05Rik, Naaladl2, Sgcz, Brinp1, Xkr6, Atp8a2, Stxbp1, Dnajc6, Brinp3, Rps2, Diaph2, Igsf8, Rpsa, Plcl1, Ubc, Ifitm3, Epas1, Cobll1, Rps4x, Actb, Rpl3, Cfl1, Cdc42, Spock2, ENSMUSG00000040904, Rps29, Rps24, B2m, Atp6v0c, Rap1a, R…	1619
GO:0046546	development of primary male sexual chara...	14	2	1.25	0.35909	0.35909	3dpi	BP	NonN_8	GO:0046546	H3f3b, Ubb	144	Kcnb2, Rbfox3, Cdh18, Hs3st4, Grik1, Trhde, Dpp6, Sgcd, Pcdh10, Ntrk3, Slc8a3, Pcdh11x, Upp2, Meg3, Samd4, Cntnap2, Tmem132b, Mctp1, Jakmip2, Dner, Cacnb4, Kif26b, D430041D05Rik, Naaladl2, Sgcz, Brinp1, Xkr6, Atp8a2, Stxbp1, Dnajc6, Brinp3, Rps2, Diaph2, Igsf8, Rpsa, Plcl1, Ubc, Ifitm3, Epas1, Cobll1, Rps4x, Actb, Rpl3, Cfl1, Cdc42, Spock2, ENSMUSG00000040904, Rps29, Rps24, B2m, Atp6v0c, Rap1a, R…	1619
GO:0046661	male sex differentiation	14	2	1.25	0.35909	0.35909	3dpi	BP	NonN_8	GO:0046661	H3f3b, Ubb	144	Kcnb2, Rbfox3, Cdh18, Hs3st4, Grik1, Trhde, Dpp6, Sgcd, Pcdh10, Ntrk3, Slc8a3, Pcdh11x, Upp2, Meg3, Samd4, Cntnap2, Tmem132b, Mctp1, Jakmip2, Dner, Cacnb4, Kif26b, D430041D05Rik, Naaladl2, Sgcz, Brinp1, Xkr6, Atp8a2, Stxbp1, Dnajc6, Brinp3, Rps2, Diaph2, Igsf8, Rpsa, Plcl1, Ubc, Ifitm3, Epas1, Cobll1, Rps4x, Actb, Rpl3, Cfl1, Cdc42, Spock2, ENSMUSG00000040904, Rps29, Rps24, B2m, Atp6v0c, Rap1a, R…	1619
GO:0046683	response to organophosphorus	14	2	1.25	0.35909	0.35909	3dpi	BP	NonN_8	GO:0046683	Rap1a, Slc8a3	144	Kcnb2, Rbfox3, Cdh18, Hs3st4, Grik1, Trhde, Dpp6, Sgcd, Pcdh10, Ntrk3, Slc8a3, Pcdh11x, Upp2, Meg3, Samd4, Cntnap2, Tmem132b, Mctp1, Jakmip2, Dner, Cacnb4, Kif26b, D430041D05Rik, Naaladl2, Sgcz, Brinp1, Xkr6, Atp8a2, Stxbp1, Dnajc6, Brinp3, Rps2, Diaph2, Igsf8, Rpsa, Plcl1, Ubc, Ifitm3, Epas1, Cobll1, Rps4x, Actb, Rpl3, Cfl1, Cdc42, Spock2, ENSMUSG00000040904, Rps29, Rps24, B2m, Atp6v0c, Rap1a, R…	1619
GO:0051100	negative regulation of binding	14	2	1.25	0.35909	0.35909	3dpi	BP	NonN_8	GO:0051100	Actb, B2m	144	Kcnb2, Rbfox3, Cdh18, Hs3st4, Grik1, Trhde, Dpp6, Sgcd, Pcdh10, Ntrk3, Slc8a3, Pcdh11x, Upp2, Meg3, Samd4, Cntnap2, Tmem132b, Mctp1, Jakmip2, Dner, Cacnb4, Kif26b, D430041D05Rik, Naaladl2, Sgcz, Brinp1, Xkr6, Atp8a2, Stxbp1, Dnajc6, Brinp3, Rps2, Diaph2, Igsf8, Rpsa, Plcl1, Ubc, Ifitm3, Epas1, Cobll1, Rps4x, Actb, Rpl3, Cfl1, Cdc42, Spock2, ENSMUSG00000040904, Rps29, Rps24, B2m, Atp6v0c, Rap1a, R…	1619
GO:0051260	protein homooligomerization	14	2	1.25	0.35909	0.35909	3dpi	BP	NonN_8	GO:0051260	B2m, Kcnb2	144	Kcnb2, Rbfox3, Cdh18, Hs3st4, Grik1, Trhde, Dpp6, Sgcd, Pcdh10, Ntrk3, Slc8a3, Pcdh11x, Upp2, Meg3, Samd4, Cntnap2, Tmem132b, Mctp1, Jakmip2, Dner, Cacnb4, Kif26b, D430041D05Rik, Naaladl2, Sgcz, Brinp1, Xkr6, Atp8a2, Stxbp1, Dnajc6, Brinp3, Rps2, Diaph2, Igsf8, Rpsa, Plcl1, Ubc, Ifitm3, Epas1, Cobll1, Rps4x, Actb, Rpl3, Cfl1, Cdc42, Spock2, ENSMUSG00000040904, Rps29, Rps24, B2m, Atp6v0c, Rap1a, R…	1619
GO:0051703	biological process involved in intraspec...	14	2	1.25	0.35909	0.35909	3dpi	BP	NonN_8	GO:0051703	Brinp1, Cntnap2	144	Kcnb2, Rbfox3, Cdh18, Hs3st4, Grik1, Trhde, Dpp6, Sgcd, Pcdh10, Ntrk3, Slc8a3, Pcdh11x, Upp2, Meg3, Samd4, Cntnap2, Tmem132b, Mctp1, Jakmip2, Dner, Cacnb4, Kif26b, D430041D05Rik, Naaladl2, Sgcz, Brinp1, Xkr6, Atp8a2, Stxbp1, Dnajc6, Brinp3, Rps2, Diaph2, Igsf8, Rpsa, Plcl1, Ubc, Ifitm3, Epas1, Cobll1, Rps4x, Actb, Rpl3, Cfl1, Cdc42, Spock2, ENSMUSG00000040904, Rps29, Rps24, B2m, Atp6v0c, Rap1a, R…	1619
GO:0070527	platelet aggregation	14	2	1.25	0.35909	0.35909	3dpi	BP	NonN_8	GO:0070527	Ppia, Stxbp1	144	Kcnb2, Rbfox3, Cdh18, Hs3st4, Grik1, Trhde, Dpp6, Sgcd, Pcdh10, Ntrk3, Slc8a3, Pcdh11x, Upp2, Meg3, Samd4, Cntnap2, Tmem132b, Mctp1, Jakmip2, Dner, Cacnb4, Kif26b, D430041D05Rik, Naaladl2, Sgcz, Brinp1, Xkr6, Atp8a2, Stxbp1, Dnajc6, Brinp3, Rps2, Diaph2, Igsf8, Rpsa, Plcl1, Ubc, Ifitm3, Epas1, Cobll1, Rps4x, Actb, Rpl3, Cfl1, Cdc42, Spock2, ENSMUSG00000040904, Rps29, Rps24, B2m, Atp6v0c, Rap1a, R…	1619
GO:0071356	cellular response to tumor necrosis fact...	14	2	1.25	0.35909	0.35909	3dpi	BP	NonN_8	GO:0071356	Cfl1, Rps3	144	Kcnb2, Rbfox3, Cdh18, Hs3st4, Grik1, Trhde, Dpp6, Sgcd, Pcdh10, Ntrk3, Slc8a3, Pcdh11x, Upp2, Meg3, Samd4, Cntnap2, Tmem132b, Mctp1, Jakmip2, Dner, Cacnb4, Kif26b, D430041D05Rik, Naaladl2, Sgcz, Brinp1, Xkr6, Atp8a2, Stxbp1, Dnajc6, Brinp3, Rps2, Diaph2, Igsf8, Rpsa, Plcl1, Ubc, Ifitm3, Epas1, Cobll1, Rps4x, Actb, Rpl3, Cfl1, Cdc42, Spock2, ENSMUSG00000040904, Rps29, Rps24, B2m, Atp6v0c, Rap1a, R…	1619
GO:0071621	granulocyte chemotaxis	14	2	1.25	0.35909	0.35909	3dpi	BP	NonN_8	GO:0071621	Bsg, Ppia	144	Kcnb2, Rbfox3, Cdh18, Hs3st4, Grik1, Trhde, Dpp6, Sgcd, Pcdh10, Ntrk3, Slc8a3, Pcdh11x, Upp2, Meg3, Samd4, Cntnap2, Tmem132b, Mctp1, Jakmip2, Dner, Cacnb4, Kif26b, D430041D05Rik, Naaladl2, Sgcz, Brinp1, Xkr6, Atp8a2, Stxbp1, Dnajc6, Brinp3, Rps2, Diaph2, Igsf8, Rpsa, Plcl1, Ubc, Ifitm3, Epas1, Cobll1, Rps4x, Actb, Rpl3, Cfl1, Cdc42, Spock2, ENSMUSG00000040904, Rps29, Rps24, B2m, Atp6v0c, Rap1a, R…	1619
GO:0071901	negative regulation of protein serine/th...	14	2	1.25	0.35909	0.35909	3dpi	BP	NonN_8	GO:0071901	Gstp1, Slc8a3	144	Kcnb2, Rbfox3, Cdh18, Hs3st4, Grik1, Trhde, Dpp6, Sgcd, Pcdh10, Ntrk3, Slc8a3, Pcdh11x, Upp2, Meg3, Samd4, Cntnap2, Tmem132b, Mctp1, Jakmip2, Dner, Cacnb4, Kif26b, D430041D05Rik, Naaladl2, Sgcz, Brinp1, Xkr6, Atp8a2, Stxbp1, Dnajc6, Brinp3, Rps2, Diaph2, Igsf8, Rpsa, Plcl1, Ubc, Ifitm3, Epas1, Cobll1, Rps4x, Actb, Rpl3, Cfl1, Cdc42, Spock2, ENSMUSG00000040904, Rps29, Rps24, B2m, Atp6v0c, Rap1a, R…	1619
GO:0099084	postsynaptic specialization organization	14	2	1.25	0.35909	0.35909	3dpi	BP	NonN_8	GO:0099084	Cfl1, Ntrk3	144	Kcnb2, Rbfox3, Cdh18, Hs3st4, Grik1, Trhde, Dpp6, Sgcd, Pcdh10, Ntrk3, Slc8a3, Pcdh11x, Upp2, Meg3, Samd4, Cntnap2, Tmem132b, Mctp1, Jakmip2, Dner, Cacnb4, Kif26b, D430041D05Rik, Naaladl2, Sgcz, Brinp1, Xkr6, Atp8a2, Stxbp1, Dnajc6, Brinp3, Rps2, Diaph2, Igsf8, Rpsa, Plcl1, Ubc, Ifitm3, Epas1, Cobll1, Rps4x, Actb, Rpl3, Cfl1, Cdc42, Spock2, ENSMUSG00000040904, Rps29, Rps24, B2m, Atp6v0c, Rap1a, R…	1619
GO:1901343	negative regulation of vasculature devel...	14	2	1.25	0.35909	0.35909	3dpi	BP	NonN_8	GO:1901343	Ptn, Sparc	144	Kcnb2, Rbfox3, Cdh18, Hs3st4, Grik1, Trhde, Dpp6, Sgcd, Pcdh10, Ntrk3, Slc8a3, Pcdh11x, Upp2, Meg3, Samd4, Cntnap2, Tmem132b, Mctp1, Jakmip2, Dner, Cacnb4, Kif26b, D430041D05Rik, Naaladl2, Sgcz, Brinp1, Xkr6, Atp8a2, Stxbp1, Dnajc6, Brinp3, Rps2, Diaph2, Igsf8, Rpsa, Plcl1, Ubc, Ifitm3, Epas1, Cobll1, Rps4x, Actb, Rpl3, Cfl1, Cdc42, Spock2, ENSMUSG00000040904, Rps29, Rps24, B2m, Atp6v0c, Rap1a, R…	1619
GO:1901617	organic hydroxy compound biosynthetic pr...	14	2	1.25	0.35909	0.35909	3dpi	BP	NonN_8	GO:1901617	Epas1, Pltp	144	Kcnb2, Rbfox3, Cdh18, Hs3st4, Grik1, Trhde, Dpp6, Sgcd, Pcdh10, Ntrk3, Slc8a3, Pcdh11x, Upp2, Meg3, Samd4, Cntnap2, Tmem132b, Mctp1, Jakmip2, Dner, Cacnb4, Kif26b, D430041D05Rik, Naaladl2, Sgcz, Brinp1, Xkr6, Atp8a2, Stxbp1, Dnajc6, Brinp3, Rps2, Diaph2, Igsf8, Rpsa, Plcl1, Ubc, Ifitm3, Epas1, Cobll1, Rps4x, Actb, Rpl3, Cfl1, Cdc42, Spock2, ENSMUSG00000040904, Rps29, Rps24, B2m, Atp6v0c, Rap1a, R…	1619
GO:1902882	regulation of response to oxidative stre...	14	2	1.25	0.35909	0.35909	3dpi	BP	NonN_8	GO:1902882	Mctp1, Ppia	144	Kcnb2, Rbfox3, Cdh18, Hs3st4, Grik1, Trhde, Dpp6, Sgcd, Pcdh10, Ntrk3, Slc8a3, Pcdh11x, Upp2, Meg3, Samd4, Cntnap2, Tmem132b, Mctp1, Jakmip2, Dner, Cacnb4, Kif26b, D430041D05Rik, Naaladl2, Sgcz, Brinp1, Xkr6, Atp8a2, Stxbp1, Dnajc6, Brinp3, Rps2, Diaph2, Igsf8, Rpsa, Plcl1, Ubc, Ifitm3, Epas1, Cobll1, Rps4x, Actb, Rpl3, Cfl1, Cdc42, Spock2, ENSMUSG00000040904, Rps29, Rps24, B2m, Atp6v0c, Rap1a, R…	1619
GO:1903793	positive regulation of anion transport	14	2	1.25	0.35909	0.35909	3dpi	BP	NonN_8	GO:1903793	Grik1, Stxbp1	144	Kcnb2, Rbfox3, Cdh18, Hs3st4, Grik1, Trhde, Dpp6, Sgcd, Pcdh10, Ntrk3, Slc8a3, Pcdh11x, Upp2, Meg3, Samd4, Cntnap2, Tmem132b, Mctp1, Jakmip2, Dner, Cacnb4, Kif26b, D430041D05Rik, Naaladl2, Sgcz, Brinp1, Xkr6, Atp8a2, Stxbp1, Dnajc6, Brinp3, Rps2, Diaph2, Igsf8, Rpsa, Plcl1, Ubc, Ifitm3, Epas1, Cobll1, Rps4x, Actb, Rpl3, Cfl1, Cdc42, Spock2, ENSMUSG00000040904, Rps29, Rps24, B2m, Atp6v0c, Rap1a, R…	1619
GO:2000181	negative regulation of blood vessel morp...	14	2	1.25	0.35909	0.35909	3dpi	BP	NonN_8	GO:2000181	Ptn, Sparc	144	Kcnb2, Rbfox3, Cdh18, Hs3st4, Grik1, Trhde, Dpp6, Sgcd, Pcdh10, Ntrk3, Slc8a3, Pcdh11x, Upp2, Meg3, Samd4, Cntnap2, Tmem132b, Mctp1, Jakmip2, Dner, Cacnb4, Kif26b, D430041D05Rik, Naaladl2, Sgcz, Brinp1, Xkr6, Atp8a2, Stxbp1, Dnajc6, Brinp3, Rps2, Diaph2, Igsf8, Rpsa, Plcl1, Ubc, Ifitm3, Epas1, Cobll1, Rps4x, Actb, Rpl3, Cfl1, Cdc42, Spock2, ENSMUSG00000040904, Rps29, Rps24, B2m, Atp6v0c, Rap1a, R…	1619
GO:0015711	organic anion transport	34	4	3.03	0.35989	0.35989	3dpi	BP	NonN_8	GO:0015711	Atp5j, Cacnb4, Grik1, Stxbp1	144	Kcnb2, Rbfox3, Cdh18, Hs3st4, Grik1, Trhde, Dpp6, Sgcd, Pcdh10, Ntrk3, Slc8a3, Pcdh11x, Upp2, Meg3, Samd4, Cntnap2, Tmem132b, Mctp1, Jakmip2, Dner, Cacnb4, Kif26b, D430041D05Rik, Naaladl2, Sgcz, Brinp1, Xkr6, Atp8a2, Stxbp1, Dnajc6, Brinp3, Rps2, Diaph2, Igsf8, Rpsa, Plcl1, Ubc, Ifitm3, Epas1, Cobll1, Rps4x, Actb, Rpl3, Cfl1, Cdc42, Spock2, ENSMUSG00000040904, Rps29, Rps24, B2m, Atp6v0c, Rap1a, R…	1619
GO:0051495	positive regulation of cytoskeleton orga...	34	4	3.03	0.35989	0.35989	3dpi	BP	NonN_8	GO:0051495	Cdc42, Cfl1, Ntrk3, Rps3	144	Kcnb2, Rbfox3, Cdh18, Hs3st4, Grik1, Trhde, Dpp6, Sgcd, Pcdh10, Ntrk3, Slc8a3, Pcdh11x, Upp2, Meg3, Samd4, Cntnap2, Tmem132b, Mctp1, Jakmip2, Dner, Cacnb4, Kif26b, D430041D05Rik, Naaladl2, Sgcz, Brinp1, Xkr6, Atp8a2, Stxbp1, Dnajc6, Brinp3, Rps2, Diaph2, Igsf8, Rpsa, Plcl1, Ubc, Ifitm3, Epas1, Cobll1, Rps4x, Actb, Rpl3, Cfl1, Cdc42, Spock2, ENSMUSG00000040904, Rps29, Rps24, B2m, Atp6v0c, Rap1a, R…	1619
GO:0032388	positive regulation of intracellular tra...	24	3	2.14	0.36290	0.36290	3dpi	BP	NonN_8	GO:0032388	Cd81, Cdc42, Hsp90ab1	144	Kcnb2, Rbfox3, Cdh18, Hs3st4, Grik1, Trhde, Dpp6, Sgcd, Pcdh10, Ntrk3, Slc8a3, Pcdh11x, Upp2, Meg3, Samd4, Cntnap2, Tmem132b, Mctp1, Jakmip2, Dner, Cacnb4, Kif26b, D430041D05Rik, Naaladl2, Sgcz, Brinp1, Xkr6, Atp8a2, Stxbp1, Dnajc6, Brinp3, Rps2, Diaph2, Igsf8, Rpsa, Plcl1, Ubc, Ifitm3, Epas1, Cobll1, Rps4x, Actb, Rpl3, Cfl1, Cdc42, Spock2, ENSMUSG00000040904, Rps29, Rps24, B2m, Atp6v0c, Rap1a, R…	1619
GO:0033135	regulation of peptidyl-serine phosphoryl...	24	3	2.14	0.36290	0.36290	3dpi	BP	NonN_8	GO:0033135	Hsp90ab1, Ntrk3, Plcl1	144	Kcnb2, Rbfox3, Cdh18, Hs3st4, Grik1, Trhde, Dpp6, Sgcd, Pcdh10, Ntrk3, Slc8a3, Pcdh11x, Upp2, Meg3, Samd4, Cntnap2, Tmem132b, Mctp1, Jakmip2, Dner, Cacnb4, Kif26b, D430041D05Rik, Naaladl2, Sgcz, Brinp1, Xkr6, Atp8a2, Stxbp1, Dnajc6, Brinp3, Rps2, Diaph2, Igsf8, Rpsa, Plcl1, Ubc, Ifitm3, Epas1, Cobll1, Rps4x, Actb, Rpl3, Cfl1, Cdc42, Spock2, ENSMUSG00000040904, Rps29, Rps24, B2m, Atp6v0c, Rap1a, R…	1619
GO:0043405	regulation of MAP kinase activity	24	3	2.14	0.36290	0.36290	3dpi	BP	NonN_8	GO:0043405	Gstp1, Ntrk3, Rps3	144	Kcnb2, Rbfox3, Cdh18, Hs3st4, Grik1, Trhde, Dpp6, Sgcd, Pcdh10, Ntrk3, Slc8a3, Pcdh11x, Upp2, Meg3, Samd4, Cntnap2, Tmem132b, Mctp1, Jakmip2, Dner, Cacnb4, Kif26b, D430041D05Rik, Naaladl2, Sgcz, Brinp1, Xkr6, Atp8a2, Stxbp1, Dnajc6, Brinp3, Rps2, Diaph2, Igsf8, Rpsa, Plcl1, Ubc, Ifitm3, Epas1, Cobll1, Rps4x, Actb, Rpl3, Cfl1, Cdc42, Spock2, ENSMUSG00000040904, Rps29, Rps24, B2m, Atp6v0c, Rap1a, R…	1619
GO:0048863	stem cell differentiation	24	3	2.14	0.36290	0.36290	3dpi	BP	NonN_8	GO:0048863	Cdc42, Cfl1, Ptn	144	Kcnb2, Rbfox3, Cdh18, Hs3st4, Grik1, Trhde, Dpp6, Sgcd, Pcdh10, Ntrk3, Slc8a3, Pcdh11x, Upp2, Meg3, Samd4, Cntnap2, Tmem132b, Mctp1, Jakmip2, Dner, Cacnb4, Kif26b, D430041D05Rik, Naaladl2, Sgcz, Brinp1, Xkr6, Atp8a2, Stxbp1, Dnajc6, Brinp3, Rps2, Diaph2, Igsf8, Rpsa, Plcl1, Ubc, Ifitm3, Epas1, Cobll1, Rps4x, Actb, Rpl3, Cfl1, Cdc42, Spock2, ENSMUSG00000040904, Rps29, Rps24, B2m, Atp6v0c, Rap1a, R…	1619
GO:0060997	dendritic spine morphogenesis	24	3	2.14	0.36290	0.36290	3dpi	BP	NonN_8	GO:0060997	Cdc42, Cfl1, Septin7	144	Kcnb2, Rbfox3, Cdh18, Hs3st4, Grik1, Trhde, Dpp6, Sgcd, Pcdh10, Ntrk3, Slc8a3, Pcdh11x, Upp2, Meg3, Samd4, Cntnap2, Tmem132b, Mctp1, Jakmip2, Dner, Cacnb4, Kif26b, D430041D05Rik, Naaladl2, Sgcz, Brinp1, Xkr6, Atp8a2, Stxbp1, Dnajc6, Brinp3, Rps2, Diaph2, Igsf8, Rpsa, Plcl1, Ubc, Ifitm3, Epas1, Cobll1, Rps4x, Actb, Rpl3, Cfl1, Cdc42, Spock2, ENSMUSG00000040904, Rps29, Rps24, B2m, Atp6v0c, Rap1a, R…	1619
GO:2000300	regulation of synaptic vesicle exocytosi...	24	3	2.14	0.36290	0.36290	3dpi	BP	NonN_8	GO:2000300	Cacnb4, Calm1, Rap1a	144	Kcnb2, Rbfox3, Cdh18, Hs3st4, Grik1, Trhde, Dpp6, Sgcd, Pcdh10, Ntrk3, Slc8a3, Pcdh11x, Upp2, Meg3, Samd4, Cntnap2, Tmem132b, Mctp1, Jakmip2, Dner, Cacnb4, Kif26b, D430041D05Rik, Naaladl2, Sgcz, Brinp1, Xkr6, Atp8a2, Stxbp1, Dnajc6, Brinp3, Rps2, Diaph2, Igsf8, Rpsa, Plcl1, Ubc, Ifitm3, Epas1, Cobll1, Rps4x, Actb, Rpl3, Cfl1, Cdc42, Spock2, ENSMUSG00000040904, Rps29, Rps24, B2m, Atp6v0c, Rap1a, R…	1619
GO:0048878	chemical homeostasis	140	14	12.48	0.36410	0.71505	3dpi	BP	NonN_8	GO:0048878	Atp1a2, Atp6v0c, B2m, Cacnb4, Calm1, Calm2, Ckb, Epas1, Ftl1, Mt1, Ndfip1, Pde8b, Sgcd, Slc8a3	144	Kcnb2, Rbfox3, Cdh18, Hs3st4, Grik1, Trhde, Dpp6, Sgcd, Pcdh10, Ntrk3, Slc8a3, Pcdh11x, Upp2, Meg3, Samd4, Cntnap2, Tmem132b, Mctp1, Jakmip2, Dner, Cacnb4, Kif26b, D430041D05Rik, Naaladl2, Sgcz, Brinp1, Xkr6, Atp8a2, Stxbp1, Dnajc6, Brinp3, Rps2, Diaph2, Igsf8, Rpsa, Plcl1, Ubc, Ifitm3, Epas1, Cobll1, Rps4x, Actb, Rpl3, Cfl1, Cdc42, Spock2, ENSMUSG00000040904, Rps29, Rps24, B2m, Atp6v0c, Rap1a, R…	1619
GO:0006875	cellular metal ion homeostasis	76	8	6.78	0.36507	0.36507	3dpi	BP	NonN_8	GO:0006875	Atp1a2, Cacnb4, Calm1, Calm2, Ftl1, Mt1, Ndfip1, Slc8a3	144	Kcnb2, Rbfox3, Cdh18, Hs3st4, Grik1, Trhde, Dpp6, Sgcd, Pcdh10, Ntrk3, Slc8a3, Pcdh11x, Upp2, Meg3, Samd4, Cntnap2, Tmem132b, Mctp1, Jakmip2, Dner, Cacnb4, Kif26b, D430041D05Rik, Naaladl2, Sgcz, Brinp1, Xkr6, Atp8a2, Stxbp1, Dnajc6, Brinp3, Rps2, Diaph2, Igsf8, Rpsa, Plcl1, Ubc, Ifitm3, Epas1, Cobll1, Rps4x, Actb, Rpl3, Cfl1, Cdc42, Spock2, ENSMUSG00000040904, Rps29, Rps24, B2m, Atp6v0c, Rap1a, R…	1619
GO:0044257	cellular protein catabolic process	76	8	6.78	0.36507	0.36507	3dpi	BP	NonN_8	GO:0044257	Cd81, Hsp90ab1, Ndfip1, Rpl11, Rpl23, Rps27a, Ubb, Ubc	144	Kcnb2, Rbfox3, Cdh18, Hs3st4, Grik1, Trhde, Dpp6, Sgcd, Pcdh10, Ntrk3, Slc8a3, Pcdh11x, Upp2, Meg3, Samd4, Cntnap2, Tmem132b, Mctp1, Jakmip2, Dner, Cacnb4, Kif26b, D430041D05Rik, Naaladl2, Sgcz, Brinp1, Xkr6, Atp8a2, Stxbp1, Dnajc6, Brinp3, Rps2, Diaph2, Igsf8, Rpsa, Plcl1, Ubc, Ifitm3, Epas1, Cobll1, Rps4x, Actb, Rpl3, Cfl1, Cdc42, Spock2, ENSMUSG00000040904, Rps29, Rps24, B2m, Atp6v0c, Rap1a, R…	1619
GO:0051051	negative regulation of transport	76	8	6.78	0.36507	0.36507	3dpi	BP	NonN_8	GO:0051051	Atp1a2, Atp5j, Calm1, Calm2, Mctp1, Ndfip1, Pde8b, Rap1a	144	Kcnb2, Rbfox3, Cdh18, Hs3st4, Grik1, Trhde, Dpp6, Sgcd, Pcdh10, Ntrk3, Slc8a3, Pcdh11x, Upp2, Meg3, Samd4, Cntnap2, Tmem132b, Mctp1, Jakmip2, Dner, Cacnb4, Kif26b, D430041D05Rik, Naaladl2, Sgcz, Brinp1, Xkr6, Atp8a2, Stxbp1, Dnajc6, Brinp3, Rps2, Diaph2, Igsf8, Rpsa, Plcl1, Ubc, Ifitm3, Epas1, Cobll1, Rps4x, Actb, Rpl3, Cfl1, Cdc42, Spock2, ENSMUSG00000040904, Rps29, Rps24, B2m, Atp6v0c, Rap1a, R…	1619
GO:0010564	regulation of cell cycle process	55	6	4.9	0.36566	0.36566	3dpi	BP	NonN_8	GO:0010564	Cacnb4, Calm1, Calm2, Cdc42, Rpl17, Rpl24	144	Kcnb2, Rbfox3, Cdh18, Hs3st4, Grik1, Trhde, Dpp6, Sgcd, Pcdh10, Ntrk3, Slc8a3, Pcdh11x, Upp2, Meg3, Samd4, Cntnap2, Tmem132b, Mctp1, Jakmip2, Dner, Cacnb4, Kif26b, D430041D05Rik, Naaladl2, Sgcz, Brinp1, Xkr6, Atp8a2, Stxbp1, Dnajc6, Brinp3, Rps2, Diaph2, Igsf8, Rpsa, Plcl1, Ubc, Ifitm3, Epas1, Cobll1, Rps4x, Actb, Rpl3, Cfl1, Cdc42, Spock2, ENSMUSG00000040904, Rps29, Rps24, B2m, Atp6v0c, Rap1a, R…	1619
GO:0001933	negative regulation of protein phosphory...	45	5	4.01	0.37334	0.37334	3dpi	BP	NonN_8	GO:0001933	Actb, Gstp1, Ntrk3, Ppia, Slc8a3	144	Kcnb2, Rbfox3, Cdh18, Hs3st4, Grik1, Trhde, Dpp6, Sgcd, Pcdh10, Ntrk3, Slc8a3, Pcdh11x, Upp2, Meg3, Samd4, Cntnap2, Tmem132b, Mctp1, Jakmip2, Dner, Cacnb4, Kif26b, D430041D05Rik, Naaladl2, Sgcz, Brinp1, Xkr6, Atp8a2, Stxbp1, Dnajc6, Brinp3, Rps2, Diaph2, Igsf8, Rpsa, Plcl1, Ubc, Ifitm3, Epas1, Cobll1, Rps4x, Actb, Rpl3, Cfl1, Cdc42, Spock2, ENSMUSG00000040904, Rps29, Rps24, B2m, Atp6v0c, Rap1a, R…	1619
GO:0007163	establishment or maintenance of cell pol...	45	5	4.01	0.37334	0.37334	3dpi	BP	NonN_8	GO:0007163	Actb, Cdc42, Cfl1, Hsp90ab1, Kif26b	144	Kcnb2, Rbfox3, Cdh18, Hs3st4, Grik1, Trhde, Dpp6, Sgcd, Pcdh10, Ntrk3, Slc8a3, Pcdh11x, Upp2, Meg3, Samd4, Cntnap2, Tmem132b, Mctp1, Jakmip2, Dner, Cacnb4, Kif26b, D430041D05Rik, Naaladl2, Sgcz, Brinp1, Xkr6, Atp8a2, Stxbp1, Dnajc6, Brinp3, Rps2, Diaph2, Igsf8, Rpsa, Plcl1, Ubc, Ifitm3, Epas1, Cobll1, Rps4x, Actb, Rpl3, Cfl1, Cdc42, Spock2, ENSMUSG00000040904, Rps29, Rps24, B2m, Atp6v0c, Rap1a, R…	1619
GO:1903522	regulation of blood circulation	45	5	4.01	0.37334	0.37334	3dpi	BP	NonN_8	GO:1903522	Atp1a2, Atp5j, Calm1, Calm2, Epas1	144	Kcnb2, Rbfox3, Cdh18, Hs3st4, Grik1, Trhde, Dpp6, Sgcd, Pcdh10, Ntrk3, Slc8a3, Pcdh11x, Upp2, Meg3, Samd4, Cntnap2, Tmem132b, Mctp1, Jakmip2, Dner, Cacnb4, Kif26b, D430041D05Rik, Naaladl2, Sgcz, Brinp1, Xkr6, Atp8a2, Stxbp1, Dnajc6, Brinp3, Rps2, Diaph2, Igsf8, Rpsa, Plcl1, Ubc, Ifitm3, Epas1, Cobll1, Rps4x, Actb, Rpl3, Cfl1, Cdc42, Spock2, ENSMUSG00000040904, Rps29, Rps24, B2m, Atp6v0c, Rap1a, R…	1619
GO:0000018	regulation of DNA recombination	5	1	0.45	0.37352	0.37352	3dpi	BP	NonN_8	GO:0000018	Ndfip1	144	Kcnb2, Rbfox3, Cdh18, Hs3st4, Grik1, Trhde, Dpp6, Sgcd, Pcdh10, Ntrk3, Slc8a3, Pcdh11x, Upp2, Meg3, Samd4, Cntnap2, Tmem132b, Mctp1, Jakmip2, Dner, Cacnb4, Kif26b, D430041D05Rik, Naaladl2, Sgcz, Brinp1, Xkr6, Atp8a2, Stxbp1, Dnajc6, Brinp3, Rps2, Diaph2, Igsf8, Rpsa, Plcl1, Ubc, Ifitm3, Epas1, Cobll1, Rps4x, Actb, Rpl3, Cfl1, Cdc42, Spock2, ENSMUSG00000040904, Rps29, Rps24, B2m, Atp6v0c, Rap1a, R…	1619
GO:0001708	cell fate specification	5	1	0.45	0.37352	0.37352	3dpi	BP	NonN_8	GO:0001708	Ntrk3	144	Kcnb2, Rbfox3, Cdh18, Hs3st4, Grik1, Trhde, Dpp6, Sgcd, Pcdh10, Ntrk3, Slc8a3, Pcdh11x, Upp2, Meg3, Samd4, Cntnap2, Tmem132b, Mctp1, Jakmip2, Dner, Cacnb4, Kif26b, D430041D05Rik, Naaladl2, Sgcz, Brinp1, Xkr6, Atp8a2, Stxbp1, Dnajc6, Brinp3, Rps2, Diaph2, Igsf8, Rpsa, Plcl1, Ubc, Ifitm3, Epas1, Cobll1, Rps4x, Actb, Rpl3, Cfl1, Cdc42, Spock2, ENSMUSG00000040904, Rps29, Rps24, B2m, Atp6v0c, Rap1a, R…	1619
GO:0001913	T cell mediated cytotoxicity	5	1	0.45	0.37352	0.37352	3dpi	BP	NonN_8	GO:0001913	B2m	144	Kcnb2, Rbfox3, Cdh18, Hs3st4, Grik1, Trhde, Dpp6, Sgcd, Pcdh10, Ntrk3, Slc8a3, Pcdh11x, Upp2, Meg3, Samd4, Cntnap2, Tmem132b, Mctp1, Jakmip2, Dner, Cacnb4, Kif26b, D430041D05Rik, Naaladl2, Sgcz, Brinp1, Xkr6, Atp8a2, Stxbp1, Dnajc6, Brinp3, Rps2, Diaph2, Igsf8, Rpsa, Plcl1, Ubc, Ifitm3, Epas1, Cobll1, Rps4x, Actb, Rpl3, Cfl1, Cdc42, Spock2, ENSMUSG00000040904, Rps29, Rps24, B2m, Atp6v0c, Rap1a, R…	1619
GO:0001914	regulation of T cell mediated cytotoxici...	5	1	0.45	0.37352	0.37352	3dpi	BP	NonN_8	GO:0001914	B2m	144	Kcnb2, Rbfox3, Cdh18, Hs3st4, Grik1, Trhde, Dpp6, Sgcd, Pcdh10, Ntrk3, Slc8a3, Pcdh11x, Upp2, Meg3, Samd4, Cntnap2, Tmem132b, Mctp1, Jakmip2, Dner, Cacnb4, Kif26b, D430041D05Rik, Naaladl2, Sgcz, Brinp1, Xkr6, Atp8a2, Stxbp1, Dnajc6, Brinp3, Rps2, Diaph2, Igsf8, Rpsa, Plcl1, Ubc, Ifitm3, Epas1, Cobll1, Rps4x, Actb, Rpl3, Cfl1, Cdc42, Spock2, ENSMUSG00000040904, Rps29, Rps24, B2m, Atp6v0c, Rap1a, R…	1619
GO:0001916	positive regulation of T cell mediated c...	5	1	0.45	0.37352	0.37352	3dpi	BP	NonN_8	GO:0001916	B2m	144	Kcnb2, Rbfox3, Cdh18, Hs3st4, Grik1, Trhde, Dpp6, Sgcd, Pcdh10, Ntrk3, Slc8a3, Pcdh11x, Upp2, Meg3, Samd4, Cntnap2, Tmem132b, Mctp1, Jakmip2, Dner, Cacnb4, Kif26b, D430041D05Rik, Naaladl2, Sgcz, Brinp1, Xkr6, Atp8a2, Stxbp1, Dnajc6, Brinp3, Rps2, Diaph2, Igsf8, Rpsa, Plcl1, Ubc, Ifitm3, Epas1, Cobll1, Rps4x, Actb, Rpl3, Cfl1, Cdc42, Spock2, ENSMUSG00000040904, Rps29, Rps24, B2m, Atp6v0c, Rap1a, R…	1619
GO:0002455	humoral immune response mediated by circ...	5	1	0.45	0.37352	0.37352	3dpi	BP	NonN_8	GO:0002455	Cd81	144	Kcnb2, Rbfox3, Cdh18, Hs3st4, Grik1, Trhde, Dpp6, Sgcd, Pcdh10, Ntrk3, Slc8a3, Pcdh11x, Upp2, Meg3, Samd4, Cntnap2, Tmem132b, Mctp1, Jakmip2, Dner, Cacnb4, Kif26b, D430041D05Rik, Naaladl2, Sgcz, Brinp1, Xkr6, Atp8a2, Stxbp1, Dnajc6, Brinp3, Rps2, Diaph2, Igsf8, Rpsa, Plcl1, Ubc, Ifitm3, Epas1, Cobll1, Rps4x, Actb, Rpl3, Cfl1, Cdc42, Spock2, ENSMUSG00000040904, Rps29, Rps24, B2m, Atp6v0c, Rap1a, R…	1619
GO:0002495	antigen processing and presentation of p...	5	1	0.45	0.37352	0.37352	3dpi	BP	NonN_8	GO:0002495	B2m	144	Kcnb2, Rbfox3, Cdh18, Hs3st4, Grik1, Trhde, Dpp6, Sgcd, Pcdh10, Ntrk3, Slc8a3, Pcdh11x, Upp2, Meg3, Samd4, Cntnap2, Tmem132b, Mctp1, Jakmip2, Dner, Cacnb4, Kif26b, D430041D05Rik, Naaladl2, Sgcz, Brinp1, Xkr6, Atp8a2, Stxbp1, Dnajc6, Brinp3, Rps2, Diaph2, Igsf8, Rpsa, Plcl1, Ubc, Ifitm3, Epas1, Cobll1, Rps4x, Actb, Rpl3, Cfl1, Cdc42, Spock2, ENSMUSG00000040904, Rps29, Rps24, B2m, Atp6v0c, Rap1a, R…	1619
GO:0002504	antigen processing and presentation of p...	5	1	0.45	0.37352	0.37352	3dpi	BP	NonN_8	GO:0002504	B2m	144	Kcnb2, Rbfox3, Cdh18, Hs3st4, Grik1, Trhde, Dpp6, Sgcd, Pcdh10, Ntrk3, Slc8a3, Pcdh11x, Upp2, Meg3, Samd4, Cntnap2, Tmem132b, Mctp1, Jakmip2, Dner, Cacnb4, Kif26b, D430041D05Rik, Naaladl2, Sgcz, Brinp1, Xkr6, Atp8a2, Stxbp1, Dnajc6, Brinp3, Rps2, Diaph2, Igsf8, Rpsa, Plcl1, Ubc, Ifitm3, Epas1, Cobll1, Rps4x, Actb, Rpl3, Cfl1, Cdc42, Spock2, ENSMUSG00000040904, Rps29, Rps24, B2m, Atp6v0c, Rap1a, R…	1619
GO:0002526	acute inflammatory response	5	1	0.45	0.37352	0.37352	3dpi	BP	NonN_8	GO:0002526	Gstp1	144	Kcnb2, Rbfox3, Cdh18, Hs3st4, Grik1, Trhde, Dpp6, Sgcd, Pcdh10, Ntrk3, Slc8a3, Pcdh11x, Upp2, Meg3, Samd4, Cntnap2, Tmem132b, Mctp1, Jakmip2, Dner, Cacnb4, Kif26b, D430041D05Rik, Naaladl2, Sgcz, Brinp1, Xkr6, Atp8a2, Stxbp1, Dnajc6, Brinp3, Rps2, Diaph2, Igsf8, Rpsa, Plcl1, Ubc, Ifitm3, Epas1, Cobll1, Rps4x, Actb, Rpl3, Cfl1, Cdc42, Spock2, ENSMUSG00000040904, Rps29, Rps24, B2m, Atp6v0c, Rap1a, R…	1619
GO:0002712	regulation of B cell mediated immunity	5	1	0.45	0.37352	0.37352	3dpi	BP	NonN_8	GO:0002712	Ndfip1	144	Kcnb2, Rbfox3, Cdh18, Hs3st4, Grik1, Trhde, Dpp6, Sgcd, Pcdh10, Ntrk3, Slc8a3, Pcdh11x, Upp2, Meg3, Samd4, Cntnap2, Tmem132b, Mctp1, Jakmip2, Dner, Cacnb4, Kif26b, D430041D05Rik, Naaladl2, Sgcz, Brinp1, Xkr6, Atp8a2, Stxbp1, Dnajc6, Brinp3, Rps2, Diaph2, Igsf8, Rpsa, Plcl1, Ubc, Ifitm3, Epas1, Cobll1, Rps4x, Actb, Rpl3, Cfl1, Cdc42, Spock2, ENSMUSG00000040904, Rps29, Rps24, B2m, Atp6v0c, Rap1a, R…	1619
GO:0002889	regulation of immunoglobulin mediated im...	5	1	0.45	0.37352	0.37352	3dpi	BP	NonN_8	GO:0002889	Ndfip1	144	Kcnb2, Rbfox3, Cdh18, Hs3st4, Grik1, Trhde, Dpp6, Sgcd, Pcdh10, Ntrk3, Slc8a3, Pcdh11x, Upp2, Meg3, Samd4, Cntnap2, Tmem132b, Mctp1, Jakmip2, Dner, Cacnb4, Kif26b, D430041D05Rik, Naaladl2, Sgcz, Brinp1, Xkr6, Atp8a2, Stxbp1, Dnajc6, Brinp3, Rps2, Diaph2, Igsf8, Rpsa, Plcl1, Ubc, Ifitm3, Epas1, Cobll1, Rps4x, Actb, Rpl3, Cfl1, Cdc42, Spock2, ENSMUSG00000040904, Rps29, Rps24, B2m, Atp6v0c, Rap1a, R…	1619
GO:0003159	morphogenesis of an endothelium	5	1	0.45	0.37352	0.37352	3dpi	BP	NonN_8	GO:0003159	Bsg	144	Kcnb2, Rbfox3, Cdh18, Hs3st4, Grik1, Trhde, Dpp6, Sgcd, Pcdh10, Ntrk3, Slc8a3, Pcdh11x, Upp2, Meg3, Samd4, Cntnap2, Tmem132b, Mctp1, Jakmip2, Dner, Cacnb4, Kif26b, D430041D05Rik, Naaladl2, Sgcz, Brinp1, Xkr6, Atp8a2, Stxbp1, Dnajc6, Brinp3, Rps2, Diaph2, Igsf8, Rpsa, Plcl1, Ubc, Ifitm3, Epas1, Cobll1, Rps4x, Actb, Rpl3, Cfl1, Cdc42, Spock2, ENSMUSG00000040904, Rps29, Rps24, B2m, Atp6v0c, Rap1a, R…	1619
GO:0006278	RNA-dependent DNA biosynthetic process	5	1	0.45	0.37352	0.37352	3dpi	BP	NonN_8	GO:0006278	Hsp90ab1	144	Kcnb2, Rbfox3, Cdh18, Hs3st4, Grik1, Trhde, Dpp6, Sgcd, Pcdh10, Ntrk3, Slc8a3, Pcdh11x, Upp2, Meg3, Samd4, Cntnap2, Tmem132b, Mctp1, Jakmip2, Dner, Cacnb4, Kif26b, D430041D05Rik, Naaladl2, Sgcz, Brinp1, Xkr6, Atp8a2, Stxbp1, Dnajc6, Brinp3, Rps2, Diaph2, Igsf8, Rpsa, Plcl1, Ubc, Ifitm3, Epas1, Cobll1, Rps4x, Actb, Rpl3, Cfl1, Cdc42, Spock2, ENSMUSG00000040904, Rps29, Rps24, B2m, Atp6v0c, Rap1a, R…	1619
GO:0007004	telomere maintenance via telomerase	5	1	0.45	0.37352	0.37352	3dpi	BP	NonN_8	GO:0007004	Hsp90ab1	144	Kcnb2, Rbfox3, Cdh18, Hs3st4, Grik1, Trhde, Dpp6, Sgcd, Pcdh10, Ntrk3, Slc8a3, Pcdh11x, Upp2, Meg3, Samd4, Cntnap2, Tmem132b, Mctp1, Jakmip2, Dner, Cacnb4, Kif26b, D430041D05Rik, Naaladl2, Sgcz, Brinp1, Xkr6, Atp8a2, Stxbp1, Dnajc6, Brinp3, Rps2, Diaph2, Igsf8, Rpsa, Plcl1, Ubc, Ifitm3, Epas1, Cobll1, Rps4x, Actb, Rpl3, Cfl1, Cdc42, Spock2, ENSMUSG00000040904, Rps29, Rps24, B2m, Atp6v0c, Rap1a, R…	1619
GO:0007549	dosage compensation	5	1	0.45	0.37352	0.37352	3dpi	BP	NonN_8	GO:0007549	Eif1	144	Kcnb2, Rbfox3, Cdh18, Hs3st4, Grik1, Trhde, Dpp6, Sgcd, Pcdh10, Ntrk3, Slc8a3, Pcdh11x, Upp2, Meg3, Samd4, Cntnap2, Tmem132b, Mctp1, Jakmip2, Dner, Cacnb4, Kif26b, D430041D05Rik, Naaladl2, Sgcz, Brinp1, Xkr6, Atp8a2, Stxbp1, Dnajc6, Brinp3, Rps2, Diaph2, Igsf8, Rpsa, Plcl1, Ubc, Ifitm3, Epas1, Cobll1, Rps4x, Actb, Rpl3, Cfl1, Cdc42, Spock2, ENSMUSG00000040904, Rps29, Rps24, B2m, Atp6v0c, Rap1a, R…	1619
GO:0009048	dosage compensation by inactivation of X...	5	1	0.45	0.37352	0.37352	3dpi	BP	NonN_8	GO:0009048	Eif1	144	Kcnb2, Rbfox3, Cdh18, Hs3st4, Grik1, Trhde, Dpp6, Sgcd, Pcdh10, Ntrk3, Slc8a3, Pcdh11x, Upp2, Meg3, Samd4, Cntnap2, Tmem132b, Mctp1, Jakmip2, Dner, Cacnb4, Kif26b, D430041D05Rik, Naaladl2, Sgcz, Brinp1, Xkr6, Atp8a2, Stxbp1, Dnajc6, Brinp3, Rps2, Diaph2, Igsf8, Rpsa, Plcl1, Ubc, Ifitm3, Epas1, Cobll1, Rps4x, Actb, Rpl3, Cfl1, Cdc42, Spock2, ENSMUSG00000040904, Rps29, Rps24, B2m, Atp6v0c, Rap1a, R…	1619
GO:0010464	regulation of mesenchymal cell prolifera...	5	1	0.45	0.37352	0.37352	3dpi	BP	NonN_8	GO:0010464	Ptn	144	Kcnb2, Rbfox3, Cdh18, Hs3st4, Grik1, Trhde, Dpp6, Sgcd, Pcdh10, Ntrk3, Slc8a3, Pcdh11x, Upp2, Meg3, Samd4, Cntnap2, Tmem132b, Mctp1, Jakmip2, Dner, Cacnb4, Kif26b, D430041D05Rik, Naaladl2, Sgcz, Brinp1, Xkr6, Atp8a2, Stxbp1, Dnajc6, Brinp3, Rps2, Diaph2, Igsf8, Rpsa, Plcl1, Ubc, Ifitm3, Epas1, Cobll1, Rps4x, Actb, Rpl3, Cfl1, Cdc42, Spock2, ENSMUSG00000040904, Rps29, Rps24, B2m, Atp6v0c, Rap1a, R…	1619
GO:0010573	vascular endothelial growth factor produ...	5	1	0.45	0.37352	0.37352	3dpi	BP	NonN_8	GO:0010573	Bsg	144	Kcnb2, Rbfox3, Cdh18, Hs3st4, Grik1, Trhde, Dpp6, Sgcd, Pcdh10, Ntrk3, Slc8a3, Pcdh11x, Upp2, Meg3, Samd4, Cntnap2, Tmem132b, Mctp1, Jakmip2, Dner, Cacnb4, Kif26b, D430041D05Rik, Naaladl2, Sgcz, Brinp1, Xkr6, Atp8a2, Stxbp1, Dnajc6, Brinp3, Rps2, Diaph2, Igsf8, Rpsa, Plcl1, Ubc, Ifitm3, Epas1, Cobll1, Rps4x, Actb, Rpl3, Cfl1, Cdc42, Spock2, ENSMUSG00000040904, Rps29, Rps24, B2m, Atp6v0c, Rap1a, R…	1619
GO:0010574	regulation of vascular endothelial growt...	5	1	0.45	0.37352	0.37352	3dpi	BP	NonN_8	GO:0010574	Bsg	144	Kcnb2, Rbfox3, Cdh18, Hs3st4, Grik1, Trhde, Dpp6, Sgcd, Pcdh10, Ntrk3, Slc8a3, Pcdh11x, Upp2, Meg3, Samd4, Cntnap2, Tmem132b, Mctp1, Jakmip2, Dner, Cacnb4, Kif26b, D430041D05Rik, Naaladl2, Sgcz, Brinp1, Xkr6, Atp8a2, Stxbp1, Dnajc6, Brinp3, Rps2, Diaph2, Igsf8, Rpsa, Plcl1, Ubc, Ifitm3, Epas1, Cobll1, Rps4x, Actb, Rpl3, Cfl1, Cdc42, Spock2, ENSMUSG00000040904, Rps29, Rps24, B2m, Atp6v0c, Rap1a, R…	1619
GO:0010842	retina layer formation	5	1	0.45	0.37352	0.37352	3dpi	BP	NonN_8	GO:0010842	Atp8a2	144	Kcnb2, Rbfox3, Cdh18, Hs3st4, Grik1, Trhde, Dpp6, Sgcd, Pcdh10, Ntrk3, Slc8a3, Pcdh11x, Upp2, Meg3, Samd4, Cntnap2, Tmem132b, Mctp1, Jakmip2, Dner, Cacnb4, Kif26b, D430041D05Rik, Naaladl2, Sgcz, Brinp1, Xkr6, Atp8a2, Stxbp1, Dnajc6, Brinp3, Rps2, Diaph2, Igsf8, Rpsa, Plcl1, Ubc, Ifitm3, Epas1, Cobll1, Rps4x, Actb, Rpl3, Cfl1, Cdc42, Spock2, ENSMUSG00000040904, Rps29, Rps24, B2m, Atp6v0c, Rap1a, R…	1619
GO:0010939	regulation of necrotic cell death	5	1	0.45	0.37352	0.37352	3dpi	BP	NonN_8	GO:0010939	Ndufc2	144	Kcnb2, Rbfox3, Cdh18, Hs3st4, Grik1, Trhde, Dpp6, Sgcd, Pcdh10, Ntrk3, Slc8a3, Pcdh11x, Upp2, Meg3, Samd4, Cntnap2, Tmem132b, Mctp1, Jakmip2, Dner, Cacnb4, Kif26b, D430041D05Rik, Naaladl2, Sgcz, Brinp1, Xkr6, Atp8a2, Stxbp1, Dnajc6, Brinp3, Rps2, Diaph2, Igsf8, Rpsa, Plcl1, Ubc, Ifitm3, Epas1, Cobll1, Rps4x, Actb, Rpl3, Cfl1, Cdc42, Spock2, ENSMUSG00000040904, Rps29, Rps24, B2m, Atp6v0c, Rap1a, R…	1619
GO:0014049	positive regulation of glutamate secreti...	5	1	0.45	0.37352	0.37352	3dpi	BP	NonN_8	GO:0014049	Stxbp1	144	Kcnb2, Rbfox3, Cdh18, Hs3st4, Grik1, Trhde, Dpp6, Sgcd, Pcdh10, Ntrk3, Slc8a3, Pcdh11x, Upp2, Meg3, Samd4, Cntnap2, Tmem132b, Mctp1, Jakmip2, Dner, Cacnb4, Kif26b, D430041D05Rik, Naaladl2, Sgcz, Brinp1, Xkr6, Atp8a2, Stxbp1, Dnajc6, Brinp3, Rps2, Diaph2, Igsf8, Rpsa, Plcl1, Ubc, Ifitm3, Epas1, Cobll1, Rps4x, Actb, Rpl3, Cfl1, Cdc42, Spock2, ENSMUSG00000040904, Rps29, Rps24, B2m, Atp6v0c, Rap1a, R…	1619
GO:0015908	fatty acid transport	5	1	0.45	0.37352	0.37352	3dpi	BP	NonN_8	GO:0015908	Atp5j	144	Kcnb2, Rbfox3, Cdh18, Hs3st4, Grik1, Trhde, Dpp6, Sgcd, Pcdh10, Ntrk3, Slc8a3, Pcdh11x, Upp2, Meg3, Samd4, Cntnap2, Tmem132b, Mctp1, Jakmip2, Dner, Cacnb4, Kif26b, D430041D05Rik, Naaladl2, Sgcz, Brinp1, Xkr6, Atp8a2, Stxbp1, Dnajc6, Brinp3, Rps2, Diaph2, Igsf8, Rpsa, Plcl1, Ubc, Ifitm3, Epas1, Cobll1, Rps4x, Actb, Rpl3, Cfl1, Cdc42, Spock2, ENSMUSG00000040904, Rps29, Rps24, B2m, Atp6v0c, Rap1a, R…	1619
GO:0015909	long-chain fatty acid transport	5	1	0.45	0.37352	0.37352	3dpi	BP	NonN_8	GO:0015909	Atp5j	144	Kcnb2, Rbfox3, Cdh18, Hs3st4, Grik1, Trhde, Dpp6, Sgcd, Pcdh10, Ntrk3, Slc8a3, Pcdh11x, Upp2, Meg3, Samd4, Cntnap2, Tmem132b, Mctp1, Jakmip2, Dner, Cacnb4, Kif26b, D430041D05Rik, Naaladl2, Sgcz, Brinp1, Xkr6, Atp8a2, Stxbp1, Dnajc6, Brinp3, Rps2, Diaph2, Igsf8, Rpsa, Plcl1, Ubc, Ifitm3, Epas1, Cobll1, Rps4x, Actb, Rpl3, Cfl1, Cdc42, Spock2, ENSMUSG00000040904, Rps29, Rps24, B2m, Atp6v0c, Rap1a, R…	1619
GO:0016445	somatic diversification of immunoglobuli...	5	1	0.45	0.37352	0.37352	3dpi	BP	NonN_8	GO:0016445	Ndfip1	144	Kcnb2, Rbfox3, Cdh18, Hs3st4, Grik1, Trhde, Dpp6, Sgcd, Pcdh10, Ntrk3, Slc8a3, Pcdh11x, Upp2, Meg3, Samd4, Cntnap2, Tmem132b, Mctp1, Jakmip2, Dner, Cacnb4, Kif26b, D430041D05Rik, Naaladl2, Sgcz, Brinp1, Xkr6, Atp8a2, Stxbp1, Dnajc6, Brinp3, Rps2, Diaph2, Igsf8, Rpsa, Plcl1, Ubc, Ifitm3, Epas1, Cobll1, Rps4x, Actb, Rpl3, Cfl1, Cdc42, Spock2, ENSMUSG00000040904, Rps29, Rps24, B2m, Atp6v0c, Rap1a, R…	1619
GO:0016447	somatic recombination of immunoglobulin ...	5	1	0.45	0.37352	0.37352	3dpi	BP	NonN_8	GO:0016447	Ndfip1	144	Kcnb2, Rbfox3, Cdh18, Hs3st4, Grik1, Trhde, Dpp6, Sgcd, Pcdh10, Ntrk3, Slc8a3, Pcdh11x, Upp2, Meg3, Samd4, Cntnap2, Tmem132b, Mctp1, Jakmip2, Dner, Cacnb4, Kif26b, D430041D05Rik, Naaladl2, Sgcz, Brinp1, Xkr6, Atp8a2, Stxbp1, Dnajc6, Brinp3, Rps2, Diaph2, Igsf8, Rpsa, Plcl1, Ubc, Ifitm3, Epas1, Cobll1, Rps4x, Actb, Rpl3, Cfl1, Cdc42, Spock2, ENSMUSG00000040904, Rps29, Rps24, B2m, Atp6v0c, Rap1a, R…	1619
GO:0019884	antigen processing and presentation of e...	5	1	0.45	0.37352	0.37352	3dpi	BP	NonN_8	GO:0019884	B2m	144	Kcnb2, Rbfox3, Cdh18, Hs3st4, Grik1, Trhde, Dpp6, Sgcd, Pcdh10, Ntrk3, Slc8a3, Pcdh11x, Upp2, Meg3, Samd4, Cntnap2, Tmem132b, Mctp1, Jakmip2, Dner, Cacnb4, Kif26b, D430041D05Rik, Naaladl2, Sgcz, Brinp1, Xkr6, Atp8a2, Stxbp1, Dnajc6, Brinp3, Rps2, Diaph2, Igsf8, Rpsa, Plcl1, Ubc, Ifitm3, Epas1, Cobll1, Rps4x, Actb, Rpl3, Cfl1, Cdc42, Spock2, ENSMUSG00000040904, Rps29, Rps24, B2m, Atp6v0c, Rap1a, R…	1619
GO:0030317	flagellated sperm motility	5	1	0.45	0.37352	0.37352	3dpi	BP	NonN_8	GO:0030317	Pltp	144	Kcnb2, Rbfox3, Cdh18, Hs3st4, Grik1, Trhde, Dpp6, Sgcd, Pcdh10, Ntrk3, Slc8a3, Pcdh11x, Upp2, Meg3, Samd4, Cntnap2, Tmem132b, Mctp1, Jakmip2, Dner, Cacnb4, Kif26b, D430041D05Rik, Naaladl2, Sgcz, Brinp1, Xkr6, Atp8a2, Stxbp1, Dnajc6, Brinp3, Rps2, Diaph2, Igsf8, Rpsa, Plcl1, Ubc, Ifitm3, Epas1, Cobll1, Rps4x, Actb, Rpl3, Cfl1, Cdc42, Spock2, ENSMUSG00000040904, Rps29, Rps24, B2m, Atp6v0c, Rap1a, R…	1619
GO:0030501	positive regulation of bone mineralizati...	5	1	0.45	0.37352	0.37352	3dpi	BP	NonN_8	GO:0030501	Ptn	144	Kcnb2, Rbfox3, Cdh18, Hs3st4, Grik1, Trhde, Dpp6, Sgcd, Pcdh10, Ntrk3, Slc8a3, Pcdh11x, Upp2, Meg3, Samd4, Cntnap2, Tmem132b, Mctp1, Jakmip2, Dner, Cacnb4, Kif26b, D430041D05Rik, Naaladl2, Sgcz, Brinp1, Xkr6, Atp8a2, Stxbp1, Dnajc6, Brinp3, Rps2, Diaph2, Igsf8, Rpsa, Plcl1, Ubc, Ifitm3, Epas1, Cobll1, Rps4x, Actb, Rpl3, Cfl1, Cdc42, Spock2, ENSMUSG00000040904, Rps29, Rps24, B2m, Atp6v0c, Rap1a, R…	1619
GO:0030859	polarized epithelial cell differentiatio...	5	1	0.45	0.37352	0.37352	3dpi	BP	NonN_8	GO:0030859	Cdc42	144	Kcnb2, Rbfox3, Cdh18, Hs3st4, Grik1, Trhde, Dpp6, Sgcd, Pcdh10, Ntrk3, Slc8a3, Pcdh11x, Upp2, Meg3, Samd4, Cntnap2, Tmem132b, Mctp1, Jakmip2, Dner, Cacnb4, Kif26b, D430041D05Rik, Naaladl2, Sgcz, Brinp1, Xkr6, Atp8a2, Stxbp1, Dnajc6, Brinp3, Rps2, Diaph2, Igsf8, Rpsa, Plcl1, Ubc, Ifitm3, Epas1, Cobll1, Rps4x, Actb, Rpl3, Cfl1, Cdc42, Spock2, ENSMUSG00000040904, Rps29, Rps24, B2m, Atp6v0c, Rap1a, R…	1619
GO:0030890	positive regulation of B cell proliferat...	5	1	0.45	0.37352	0.37352	3dpi	BP	NonN_8	GO:0030890	Cd81	144	Kcnb2, Rbfox3, Cdh18, Hs3st4, Grik1, Trhde, Dpp6, Sgcd, Pcdh10, Ntrk3, Slc8a3, Pcdh11x, Upp2, Meg3, Samd4, Cntnap2, Tmem132b, Mctp1, Jakmip2, Dner, Cacnb4, Kif26b, D430041D05Rik, Naaladl2, Sgcz, Brinp1, Xkr6, Atp8a2, Stxbp1, Dnajc6, Brinp3, Rps2, Diaph2, Igsf8, Rpsa, Plcl1, Ubc, Ifitm3, Epas1, Cobll1, Rps4x, Actb, Rpl3, Cfl1, Cdc42, Spock2, ENSMUSG00000040904, Rps29, Rps24, B2m, Atp6v0c, Rap1a, R…	1619
GO:0031223	auditory behavior	5	1	0.45	0.37352	0.37352	3dpi	BP	NonN_8	GO:0031223	Cntnap2	144	Kcnb2, Rbfox3, Cdh18, Hs3st4, Grik1, Trhde, Dpp6, Sgcd, Pcdh10, Ntrk3, Slc8a3, Pcdh11x, Upp2, Meg3, Samd4, Cntnap2, Tmem132b, Mctp1, Jakmip2, Dner, Cacnb4, Kif26b, D430041D05Rik, Naaladl2, Sgcz, Brinp1, Xkr6, Atp8a2, Stxbp1, Dnajc6, Brinp3, Rps2, Diaph2, Igsf8, Rpsa, Plcl1, Ubc, Ifitm3, Epas1, Cobll1, Rps4x, Actb, Rpl3, Cfl1, Cdc42, Spock2, ENSMUSG00000040904, Rps29, Rps24, B2m, Atp6v0c, Rap1a, R…	1619
GO:0031648	protein destabilization	5	1	0.45	0.37352	0.37352	3dpi	BP	NonN_8	GO:0031648	Serf2	144	Kcnb2, Rbfox3, Cdh18, Hs3st4, Grik1, Trhde, Dpp6, Sgcd, Pcdh10, Ntrk3, Slc8a3, Pcdh11x, Upp2, Meg3, Samd4, Cntnap2, Tmem132b, Mctp1, Jakmip2, Dner, Cacnb4, Kif26b, D430041D05Rik, Naaladl2, Sgcz, Brinp1, Xkr6, Atp8a2, Stxbp1, Dnajc6, Brinp3, Rps2, Diaph2, Igsf8, Rpsa, Plcl1, Ubc, Ifitm3, Epas1, Cobll1, Rps4x, Actb, Rpl3, Cfl1, Cdc42, Spock2, ENSMUSG00000040904, Rps29, Rps24, B2m, Atp6v0c, Rap1a, R…	1619
GO:0032230	positive regulation of synaptic transmis...	5	1	0.45	0.37352	0.37352	3dpi	BP	NonN_8	GO:0032230	Grik1	144	Kcnb2, Rbfox3, Cdh18, Hs3st4, Grik1, Trhde, Dpp6, Sgcd, Pcdh10, Ntrk3, Slc8a3, Pcdh11x, Upp2, Meg3, Samd4, Cntnap2, Tmem132b, Mctp1, Jakmip2, Dner, Cacnb4, Kif26b, D430041D05Rik, Naaladl2, Sgcz, Brinp1, Xkr6, Atp8a2, Stxbp1, Dnajc6, Brinp3, Rps2, Diaph2, Igsf8, Rpsa, Plcl1, Ubc, Ifitm3, Epas1, Cobll1, Rps4x, Actb, Rpl3, Cfl1, Cdc42, Spock2, ENSMUSG00000040904, Rps29, Rps24, B2m, Atp6v0c, Rap1a, R…	1619
GO:0032369	negative regulation of lipid transport	5	1	0.45	0.37352	0.37352	3dpi	BP	NonN_8	GO:0032369	Atp5j	144	Kcnb2, Rbfox3, Cdh18, Hs3st4, Grik1, Trhde, Dpp6, Sgcd, Pcdh10, Ntrk3, Slc8a3, Pcdh11x, Upp2, Meg3, Samd4, Cntnap2, Tmem132b, Mctp1, Jakmip2, Dner, Cacnb4, Kif26b, D430041D05Rik, Naaladl2, Sgcz, Brinp1, Xkr6, Atp8a2, Stxbp1, Dnajc6, Brinp3, Rps2, Diaph2, Igsf8, Rpsa, Plcl1, Ubc, Ifitm3, Epas1, Cobll1, Rps4x, Actb, Rpl3, Cfl1, Cdc42, Spock2, ENSMUSG00000040904, Rps29, Rps24, B2m, Atp6v0c, Rap1a, R…	1619
GO:0032488	Cdc42 protein signal transduction	5	1	0.45	0.37352	0.37352	3dpi	BP	NonN_8	GO:0032488	Cdc42	144	Kcnb2, Rbfox3, Cdh18, Hs3st4, Grik1, Trhde, Dpp6, Sgcd, Pcdh10, Ntrk3, Slc8a3, Pcdh11x, Upp2, Meg3, Samd4, Cntnap2, Tmem132b, Mctp1, Jakmip2, Dner, Cacnb4, Kif26b, D430041D05Rik, Naaladl2, Sgcz, Brinp1, Xkr6, Atp8a2, Stxbp1, Dnajc6, Brinp3, Rps2, Diaph2, Igsf8, Rpsa, Plcl1, Ubc, Ifitm3, Epas1, Cobll1, Rps4x, Actb, Rpl3, Cfl1, Cdc42, Spock2, ENSMUSG00000040904, Rps29, Rps24, B2m, Atp6v0c, Rap1a, R…	1619
GO:0032928	regulation of superoxide anion generatio...	5	1	0.45	0.37352	0.37352	3dpi	BP	NonN_8	GO:0032928	Gstp1	144	Kcnb2, Rbfox3, Cdh18, Hs3st4, Grik1, Trhde, Dpp6, Sgcd, Pcdh10, Ntrk3, Slc8a3, Pcdh11x, Upp2, Meg3, Samd4, Cntnap2, Tmem132b, Mctp1, Jakmip2, Dner, Cacnb4, Kif26b, D430041D05Rik, Naaladl2, Sgcz, Brinp1, Xkr6, Atp8a2, Stxbp1, Dnajc6, Brinp3, Rps2, Diaph2, Igsf8, Rpsa, Plcl1, Ubc, Ifitm3, Epas1, Cobll1, Rps4x, Actb, Rpl3, Cfl1, Cdc42, Spock2, ENSMUSG00000040904, Rps29, Rps24, B2m, Atp6v0c, Rap1a, R…	1619
GO:0032930	positive regulation of superoxide anion ...	5	1	0.45	0.37352	0.37352	3dpi	BP	NonN_8	GO:0032930	Gstp1	144	Kcnb2, Rbfox3, Cdh18, Hs3st4, Grik1, Trhde, Dpp6, Sgcd, Pcdh10, Ntrk3, Slc8a3, Pcdh11x, Upp2, Meg3, Samd4, Cntnap2, Tmem132b, Mctp1, Jakmip2, Dner, Cacnb4, Kif26b, D430041D05Rik, Naaladl2, Sgcz, Brinp1, Xkr6, Atp8a2, Stxbp1, Dnajc6, Brinp3, Rps2, Diaph2, Igsf8, Rpsa, Plcl1, Ubc, Ifitm3, Epas1, Cobll1, Rps4x, Actb, Rpl3, Cfl1, Cdc42, Spock2, ENSMUSG00000040904, Rps29, Rps24, B2m, Atp6v0c, Rap1a, R…	1619
GO:0032945	negative regulation of mononuclear cell ...	5	1	0.45	0.37352	0.37352	3dpi	BP	NonN_8	GO:0032945	Ndfip1	144	Kcnb2, Rbfox3, Cdh18, Hs3st4, Grik1, Trhde, Dpp6, Sgcd, Pcdh10, Ntrk3, Slc8a3, Pcdh11x, Upp2, Meg3, Samd4, Cntnap2, Tmem132b, Mctp1, Jakmip2, Dner, Cacnb4, Kif26b, D430041D05Rik, Naaladl2, Sgcz, Brinp1, Xkr6, Atp8a2, Stxbp1, Dnajc6, Brinp3, Rps2, Diaph2, Igsf8, Rpsa, Plcl1, Ubc, Ifitm3, Epas1, Cobll1, Rps4x, Actb, Rpl3, Cfl1, Cdc42, Spock2, ENSMUSG00000040904, Rps29, Rps24, B2m, Atp6v0c, Rap1a, R…	1619
GO:0032963	collagen metabolic process	5	1	0.45	0.37352	0.37352	3dpi	BP	NonN_8	GO:0032963	Rap1a	144	Kcnb2, Rbfox3, Cdh18, Hs3st4, Grik1, Trhde, Dpp6, Sgcd, Pcdh10, Ntrk3, Slc8a3, Pcdh11x, Upp2, Meg3, Samd4, Cntnap2, Tmem132b, Mctp1, Jakmip2, Dner, Cacnb4, Kif26b, D430041D05Rik, Naaladl2, Sgcz, Brinp1, Xkr6, Atp8a2, Stxbp1, Dnajc6, Brinp3, Rps2, Diaph2, Igsf8, Rpsa, Plcl1, Ubc, Ifitm3, Epas1, Cobll1, Rps4x, Actb, Rpl3, Cfl1, Cdc42, Spock2, ENSMUSG00000040904, Rps29, Rps24, B2m, Atp6v0c, Rap1a, R…	1619
GO:0034605	cellular response to heat	5	1	0.45	0.37352	0.37352	3dpi	BP	NonN_8	GO:0034605	Hsp90ab1	144	Kcnb2, Rbfox3, Cdh18, Hs3st4, Grik1, Trhde, Dpp6, Sgcd, Pcdh10, Ntrk3, Slc8a3, Pcdh11x, Upp2, Meg3, Samd4, Cntnap2, Tmem132b, Mctp1, Jakmip2, Dner, Cacnb4, Kif26b, D430041D05Rik, Naaladl2, Sgcz, Brinp1, Xkr6, Atp8a2, Stxbp1, Dnajc6, Brinp3, Rps2, Diaph2, Igsf8, Rpsa, Plcl1, Ubc, Ifitm3, Epas1, Cobll1, Rps4x, Actb, Rpl3, Cfl1, Cdc42, Spock2, ENSMUSG00000040904, Rps29, Rps24, B2m, Atp6v0c, Rap1a, R…	1619
GO:0034629	cellular protein-containing complex loca...	5	1	0.45	0.37352	0.37352	3dpi	BP	NonN_8	GO:0034629	Sgcd	144	Kcnb2, Rbfox3, Cdh18, Hs3st4, Grik1, Trhde, Dpp6, Sgcd, Pcdh10, Ntrk3, Slc8a3, Pcdh11x, Upp2, Meg3, Samd4, Cntnap2, Tmem132b, Mctp1, Jakmip2, Dner, Cacnb4, Kif26b, D430041D05Rik, Naaladl2, Sgcz, Brinp1, Xkr6, Atp8a2, Stxbp1, Dnajc6, Brinp3, Rps2, Diaph2, Igsf8, Rpsa, Plcl1, Ubc, Ifitm3, Epas1, Cobll1, Rps4x, Actb, Rpl3, Cfl1, Cdc42, Spock2, ENSMUSG00000040904, Rps29, Rps24, B2m, Atp6v0c, Rap1a, R…	1619
GO:0035641	locomotory exploration behavior	5	1	0.45	0.37352	0.37352	3dpi	BP	NonN_8	GO:0035641	Atp1a2	144	Kcnb2, Rbfox3, Cdh18, Hs3st4, Grik1, Trhde, Dpp6, Sgcd, Pcdh10, Ntrk3, Slc8a3, Pcdh11x, Upp2, Meg3, Samd4, Cntnap2, Tmem132b, Mctp1, Jakmip2, Dner, Cacnb4, Kif26b, D430041D05Rik, Naaladl2, Sgcz, Brinp1, Xkr6, Atp8a2, Stxbp1, Dnajc6, Brinp3, Rps2, Diaph2, Igsf8, Rpsa, Plcl1, Ubc, Ifitm3, Epas1, Cobll1, Rps4x, Actb, Rpl3, Cfl1, Cdc42, Spock2, ENSMUSG00000040904, Rps29, Rps24, B2m, Atp6v0c, Rap1a, R…	1619
GO:0038093	Fc receptor signaling pathway	5	1	0.45	0.37352	0.37352	3dpi	BP	NonN_8	GO:0038093	Rap1a	144	Kcnb2, Rbfox3, Cdh18, Hs3st4, Grik1, Trhde, Dpp6, Sgcd, Pcdh10, Ntrk3, Slc8a3, Pcdh11x, Upp2, Meg3, Samd4, Cntnap2, Tmem132b, Mctp1, Jakmip2, Dner, Cacnb4, Kif26b, D430041D05Rik, Naaladl2, Sgcz, Brinp1, Xkr6, Atp8a2, Stxbp1, Dnajc6, Brinp3, Rps2, Diaph2, Igsf8, Rpsa, Plcl1, Ubc, Ifitm3, Epas1, Cobll1, Rps4x, Actb, Rpl3, Cfl1, Cdc42, Spock2, ENSMUSG00000040904, Rps29, Rps24, B2m, Atp6v0c, Rap1a, R…	1619
GO:0038094	Fc-gamma receptor signaling pathway	5	1	0.45	0.37352	0.37352	3dpi	BP	NonN_8	GO:0038094	Rap1a	144	Kcnb2, Rbfox3, Cdh18, Hs3st4, Grik1, Trhde, Dpp6, Sgcd, Pcdh10, Ntrk3, Slc8a3, Pcdh11x, Upp2, Meg3, Samd4, Cntnap2, Tmem132b, Mctp1, Jakmip2, Dner, Cacnb4, Kif26b, D430041D05Rik, Naaladl2, Sgcz, Brinp1, Xkr6, Atp8a2, Stxbp1, Dnajc6, Brinp3, Rps2, Diaph2, Igsf8, Rpsa, Plcl1, Ubc, Ifitm3, Epas1, Cobll1, Rps4x, Actb, Rpl3, Cfl1, Cdc42, Spock2, ENSMUSG00000040904, Rps29, Rps24, B2m, Atp6v0c, Rap1a, R…	1619
GO:0042053	regulation of dopamine metabolic process	5	1	0.45	0.37352	0.37352	3dpi	BP	NonN_8	GO:0042053	Epas1	144	Kcnb2, Rbfox3, Cdh18, Hs3st4, Grik1, Trhde, Dpp6, Sgcd, Pcdh10, Ntrk3, Slc8a3, Pcdh11x, Upp2, Meg3, Samd4, Cntnap2, Tmem132b, Mctp1, Jakmip2, Dner, Cacnb4, Kif26b, D430041D05Rik, Naaladl2, Sgcz, Brinp1, Xkr6, Atp8a2, Stxbp1, Dnajc6, Brinp3, Rps2, Diaph2, Igsf8, Rpsa, Plcl1, Ubc, Ifitm3, Epas1, Cobll1, Rps4x, Actb, Rpl3, Cfl1, Cdc42, Spock2, ENSMUSG00000040904, Rps29, Rps24, B2m, Atp6v0c, Rap1a, R…	1619
GO:0042069	regulation of catecholamine metabolic pr...	5	1	0.45	0.37352	0.37352	3dpi	BP	NonN_8	GO:0042069	Epas1	144	Kcnb2, Rbfox3, Cdh18, Hs3st4, Grik1, Trhde, Dpp6, Sgcd, Pcdh10, Ntrk3, Slc8a3, Pcdh11x, Upp2, Meg3, Samd4, Cntnap2, Tmem132b, Mctp1, Jakmip2, Dner, Cacnb4, Kif26b, D430041D05Rik, Naaladl2, Sgcz, Brinp1, Xkr6, Atp8a2, Stxbp1, Dnajc6, Brinp3, Rps2, Diaph2, Igsf8, Rpsa, Plcl1, Ubc, Ifitm3, Epas1, Cobll1, Rps4x, Actb, Rpl3, Cfl1, Cdc42, Spock2, ENSMUSG00000040904, Rps29, Rps24, B2m, Atp6v0c, Rap1a, R…	1619
GO:0042104	positive regulation of activated T cell ...	5	1	0.45	0.37352	0.37352	3dpi	BP	NonN_8	GO:0042104	Rps3	144	Kcnb2, Rbfox3, Cdh18, Hs3st4, Grik1, Trhde, Dpp6, Sgcd, Pcdh10, Ntrk3, Slc8a3, Pcdh11x, Upp2, Meg3, Samd4, Cntnap2, Tmem132b, Mctp1, Jakmip2, Dner, Cacnb4, Kif26b, D430041D05Rik, Naaladl2, Sgcz, Brinp1, Xkr6, Atp8a2, Stxbp1, Dnajc6, Brinp3, Rps2, Diaph2, Igsf8, Rpsa, Plcl1, Ubc, Ifitm3, Epas1, Cobll1, Rps4x, Actb, Rpl3, Cfl1, Cdc42, Spock2, ENSMUSG00000040904, Rps29, Rps24, B2m, Atp6v0c, Rap1a, R…	1619
GO:0042446	hormone biosynthetic process	5	1	0.45	0.37352	0.37352	3dpi	BP	NonN_8	GO:0042446	Pde8b	144	Kcnb2, Rbfox3, Cdh18, Hs3st4, Grik1, Trhde, Dpp6, Sgcd, Pcdh10, Ntrk3, Slc8a3, Pcdh11x, Upp2, Meg3, Samd4, Cntnap2, Tmem132b, Mctp1, Jakmip2, Dner, Cacnb4, Kif26b, D430041D05Rik, Naaladl2, Sgcz, Brinp1, Xkr6, Atp8a2, Stxbp1, Dnajc6, Brinp3, Rps2, Diaph2, Igsf8, Rpsa, Plcl1, Ubc, Ifitm3, Epas1, Cobll1, Rps4x, Actb, Rpl3, Cfl1, Cdc42, Spock2, ENSMUSG00000040904, Rps29, Rps24, B2m, Atp6v0c, Rap1a, R…	1619
GO:0042554	superoxide anion generation	5	1	0.45	0.37352	0.37352	3dpi	BP	NonN_8	GO:0042554	Gstp1	144	Kcnb2, Rbfox3, Cdh18, Hs3st4, Grik1, Trhde, Dpp6, Sgcd, Pcdh10, Ntrk3, Slc8a3, Pcdh11x, Upp2, Meg3, Samd4, Cntnap2, Tmem132b, Mctp1, Jakmip2, Dner, Cacnb4, Kif26b, D430041D05Rik, Naaladl2, Sgcz, Brinp1, Xkr6, Atp8a2, Stxbp1, Dnajc6, Brinp3, Rps2, Diaph2, Igsf8, Rpsa, Plcl1, Ubc, Ifitm3, Epas1, Cobll1, Rps4x, Actb, Rpl3, Cfl1, Cdc42, Spock2, ENSMUSG00000040904, Rps29, Rps24, B2m, Atp6v0c, Rap1a, R…	1619
GO:0042759	long-chain fatty acid biosynthetic proce...	5	1	0.45	0.37352	0.37352	3dpi	BP	NonN_8	GO:0042759	Gstp1	144	Kcnb2, Rbfox3, Cdh18, Hs3st4, Grik1, Trhde, Dpp6, Sgcd, Pcdh10, Ntrk3, Slc8a3, Pcdh11x, Upp2, Meg3, Samd4, Cntnap2, Tmem132b, Mctp1, Jakmip2, Dner, Cacnb4, Kif26b, D430041D05Rik, Naaladl2, Sgcz, Brinp1, Xkr6, Atp8a2, Stxbp1, Dnajc6, Brinp3, Rps2, Diaph2, Igsf8, Rpsa, Plcl1, Ubc, Ifitm3, Epas1, Cobll1, Rps4x, Actb, Rpl3, Cfl1, Cdc42, Spock2, ENSMUSG00000040904, Rps29, Rps24, B2m, Atp6v0c, Rap1a, R…	1619
GO:0043302	positive regulation of leukocyte degranu...	5	1	0.45	0.37352	0.37352	3dpi	BP	NonN_8	GO:0043302	Stxbp1	144	Kcnb2, Rbfox3, Cdh18, Hs3st4, Grik1, Trhde, Dpp6, Sgcd, Pcdh10, Ntrk3, Slc8a3, Pcdh11x, Upp2, Meg3, Samd4, Cntnap2, Tmem132b, Mctp1, Jakmip2, Dner, Cacnb4, Kif26b, D430041D05Rik, Naaladl2, Sgcz, Brinp1, Xkr6, Atp8a2, Stxbp1, Dnajc6, Brinp3, Rps2, Diaph2, Igsf8, Rpsa, Plcl1, Ubc, Ifitm3, Epas1, Cobll1, Rps4x, Actb, Rpl3, Cfl1, Cdc42, Spock2, ENSMUSG00000040904, Rps29, Rps24, B2m, Atp6v0c, Rap1a, R…	1619
GO:0043403	skeletal muscle tissue regeneration	5	1	0.45	0.37352	0.37352	3dpi	BP	NonN_8	GO:0043403	Cd81	144	Kcnb2, Rbfox3, Cdh18, Hs3st4, Grik1, Trhde, Dpp6, Sgcd, Pcdh10, Ntrk3, Slc8a3, Pcdh11x, Upp2, Meg3, Samd4, Cntnap2, Tmem132b, Mctp1, Jakmip2, Dner, Cacnb4, Kif26b, D430041D05Rik, Naaladl2, Sgcz, Brinp1, Xkr6, Atp8a2, Stxbp1, Dnajc6, Brinp3, Rps2, Diaph2, Igsf8, Rpsa, Plcl1, Ubc, Ifitm3, Epas1, Cobll1, Rps4x, Actb, Rpl3, Cfl1, Cdc42, Spock2, ENSMUSG00000040904, Rps29, Rps24, B2m, Atp6v0c, Rap1a, R…	1619
GO:0043552	positive regulation of phosphatidylinosi...	5	1	0.45	0.37352	0.37352	3dpi	BP	NonN_8	GO:0043552	Cdc42	144	Kcnb2, Rbfox3, Cdh18, Hs3st4, Grik1, Trhde, Dpp6, Sgcd, Pcdh10, Ntrk3, Slc8a3, Pcdh11x, Upp2, Meg3, Samd4, Cntnap2, Tmem132b, Mctp1, Jakmip2, Dner, Cacnb4, Kif26b, D430041D05Rik, Naaladl2, Sgcz, Brinp1, Xkr6, Atp8a2, Stxbp1, Dnajc6, Brinp3, Rps2, Diaph2, Igsf8, Rpsa, Plcl1, Ubc, Ifitm3, Epas1, Cobll1, Rps4x, Actb, Rpl3, Cfl1, Cdc42, Spock2, ENSMUSG00000040904, Rps29, Rps24, B2m, Atp6v0c, Rap1a, R…	1619
GO:0045739	positive regulation of DNA repair	5	1	0.45	0.37352	0.37352	3dpi	BP	NonN_8	GO:0045739	Rps3	144	Kcnb2, Rbfox3, Cdh18, Hs3st4, Grik1, Trhde, Dpp6, Sgcd, Pcdh10, Ntrk3, Slc8a3, Pcdh11x, Upp2, Meg3, Samd4, Cntnap2, Tmem132b, Mctp1, Jakmip2, Dner, Cacnb4, Kif26b, D430041D05Rik, Naaladl2, Sgcz, Brinp1, Xkr6, Atp8a2, Stxbp1, Dnajc6, Brinp3, Rps2, Diaph2, Igsf8, Rpsa, Plcl1, Ubc, Ifitm3, Epas1, Cobll1, Rps4x, Actb, Rpl3, Cfl1, Cdc42, Spock2, ENSMUSG00000040904, Rps29, Rps24, B2m, Atp6v0c, Rap1a, R…	1619
GO:0045838	positive regulation of membrane potentia...	5	1	0.45	0.37352	0.37352	3dpi	BP	NonN_8	GO:0045838	Ndufc2	144	Kcnb2, Rbfox3, Cdh18, Hs3st4, Grik1, Trhde, Dpp6, Sgcd, Pcdh10, Ntrk3, Slc8a3, Pcdh11x, Upp2, Meg3, Samd4, Cntnap2, Tmem132b, Mctp1, Jakmip2, Dner, Cacnb4, Kif26b, D430041D05Rik, Naaladl2, Sgcz, Brinp1, Xkr6, Atp8a2, Stxbp1, Dnajc6, Brinp3, Rps2, Diaph2, Igsf8, Rpsa, Plcl1, Ubc, Ifitm3, Epas1, Cobll1, Rps4x, Actb, Rpl3, Cfl1, Cdc42, Spock2, ENSMUSG00000040904, Rps29, Rps24, B2m, Atp6v0c, Rap1a, R…	1619
GO:0045932	negative regulation of muscle contractio...	5	1	0.45	0.37352	0.37352	3dpi	BP	NonN_8	GO:0045932	Atp1a2	144	Kcnb2, Rbfox3, Cdh18, Hs3st4, Grik1, Trhde, Dpp6, Sgcd, Pcdh10, Ntrk3, Slc8a3, Pcdh11x, Upp2, Meg3, Samd4, Cntnap2, Tmem132b, Mctp1, Jakmip2, Dner, Cacnb4, Kif26b, D430041D05Rik, Naaladl2, Sgcz, Brinp1, Xkr6, Atp8a2, Stxbp1, Dnajc6, Brinp3, Rps2, Diaph2, Igsf8, Rpsa, Plcl1, Ubc, Ifitm3, Epas1, Cobll1, Rps4x, Actb, Rpl3, Cfl1, Cdc42, Spock2, ENSMUSG00000040904, Rps29, Rps24, B2m, Atp6v0c, Rap1a, R…	1619
GO:0045981	positive regulation of nucleotide metabo...	5	1	0.45	0.37352	0.37352	3dpi	BP	NonN_8	GO:0045981	Ndufc2	144	Kcnb2, Rbfox3, Cdh18, Hs3st4, Grik1, Trhde, Dpp6, Sgcd, Pcdh10, Ntrk3, Slc8a3, Pcdh11x, Upp2, Meg3, Samd4, Cntnap2, Tmem132b, Mctp1, Jakmip2, Dner, Cacnb4, Kif26b, D430041D05Rik, Naaladl2, Sgcz, Brinp1, Xkr6, Atp8a2, Stxbp1, Dnajc6, Brinp3, Rps2, Diaph2, Igsf8, Rpsa, Plcl1, Ubc, Ifitm3, Epas1, Cobll1, Rps4x, Actb, Rpl3, Cfl1, Cdc42, Spock2, ENSMUSG00000040904, Rps29, Rps24, B2m, Atp6v0c, Rap1a, R…	1619
GO:0046189	phenol-containing compound biosynthetic ...	5	1	0.45	0.37352	0.37352	3dpi	BP	NonN_8	GO:0046189	Epas1	144	Kcnb2, Rbfox3, Cdh18, Hs3st4, Grik1, Trhde, Dpp6, Sgcd, Pcdh10, Ntrk3, Slc8a3, Pcdh11x, Upp2, Meg3, Samd4, Cntnap2, Tmem132b, Mctp1, Jakmip2, Dner, Cacnb4, Kif26b, D430041D05Rik, Naaladl2, Sgcz, Brinp1, Xkr6, Atp8a2, Stxbp1, Dnajc6, Brinp3, Rps2, Diaph2, Igsf8, Rpsa, Plcl1, Ubc, Ifitm3, Epas1, Cobll1, Rps4x, Actb, Rpl3, Cfl1, Cdc42, Spock2, ENSMUSG00000040904, Rps29, Rps24, B2m, Atp6v0c, Rap1a, R…	1619
GO:0046676	negative regulation of insulin secretion	5	1	0.45	0.37352	0.37352	3dpi	BP	NonN_8	GO:0046676	Pde8b	144	Kcnb2, Rbfox3, Cdh18, Hs3st4, Grik1, Trhde, Dpp6, Sgcd, Pcdh10, Ntrk3, Slc8a3, Pcdh11x, Upp2, Meg3, Samd4, Cntnap2, Tmem132b, Mctp1, Jakmip2, Dner, Cacnb4, Kif26b, D430041D05Rik, Naaladl2, Sgcz, Brinp1, Xkr6, Atp8a2, Stxbp1, Dnajc6, Brinp3, Rps2, Diaph2, Igsf8, Rpsa, Plcl1, Ubc, Ifitm3, Epas1, Cobll1, Rps4x, Actb, Rpl3, Cfl1, Cdc42, Spock2, ENSMUSG00000040904, Rps29, Rps24, B2m, Atp6v0c, Rap1a, R…	1619
GO:0046686	response to cadmium ion	5	1	0.45	0.37352	0.37352	3dpi	BP	NonN_8	GO:0046686	Mt1	144	Kcnb2, Rbfox3, Cdh18, Hs3st4, Grik1, Trhde, Dpp6, Sgcd, Pcdh10, Ntrk3, Slc8a3, Pcdh11x, Upp2, Meg3, Samd4, Cntnap2, Tmem132b, Mctp1, Jakmip2, Dner, Cacnb4, Kif26b, D430041D05Rik, Naaladl2, Sgcz, Brinp1, Xkr6, Atp8a2, Stxbp1, Dnajc6, Brinp3, Rps2, Diaph2, Igsf8, Rpsa, Plcl1, Ubc, Ifitm3, Epas1, Cobll1, Rps4x, Actb, Rpl3, Cfl1, Cdc42, Spock2, ENSMUSG00000040904, Rps29, Rps24, B2m, Atp6v0c, Rap1a, R…	1619
GO:0046688	response to copper ion	5	1	0.45	0.37352	0.37352	3dpi	BP	NonN_8	GO:0046688	Mt1	144	Kcnb2, Rbfox3, Cdh18, Hs3st4, Grik1, Trhde, Dpp6, Sgcd, Pcdh10, Ntrk3, Slc8a3, Pcdh11x, Upp2, Meg3, Samd4, Cntnap2, Tmem132b, Mctp1, Jakmip2, Dner, Cacnb4, Kif26b, D430041D05Rik, Naaladl2, Sgcz, Brinp1, Xkr6, Atp8a2, Stxbp1, Dnajc6, Brinp3, Rps2, Diaph2, Igsf8, Rpsa, Plcl1, Ubc, Ifitm3, Epas1, Cobll1, Rps4x, Actb, Rpl3, Cfl1, Cdc42, Spock2, ENSMUSG00000040904, Rps29, Rps24, B2m, Atp6v0c, Rap1a, R…	1619
GO:0046716	muscle cell cellular homeostasis	5	1	0.45	0.37352	0.37352	3dpi	BP	NonN_8	GO:0046716	Aldoa	144	Kcnb2, Rbfox3, Cdh18, Hs3st4, Grik1, Trhde, Dpp6, Sgcd, Pcdh10, Ntrk3, Slc8a3, Pcdh11x, Upp2, Meg3, Samd4, Cntnap2, Tmem132b, Mctp1, Jakmip2, Dner, Cacnb4, Kif26b, D430041D05Rik, Naaladl2, Sgcz, Brinp1, Xkr6, Atp8a2, Stxbp1, Dnajc6, Brinp3, Rps2, Diaph2, Igsf8, Rpsa, Plcl1, Ubc, Ifitm3, Epas1, Cobll1, Rps4x, Actb, Rpl3, Cfl1, Cdc42, Spock2, ENSMUSG00000040904, Rps29, Rps24, B2m, Atp6v0c, Rap1a, R…	1619
GO:0046885	regulation of hormone biosynthetic proce...	5	1	0.45	0.37352	0.37352	3dpi	BP	NonN_8	GO:0046885	Pde8b	144	Kcnb2, Rbfox3, Cdh18, Hs3st4, Grik1, Trhde, Dpp6, Sgcd, Pcdh10, Ntrk3, Slc8a3, Pcdh11x, Upp2, Meg3, Samd4, Cntnap2, Tmem132b, Mctp1, Jakmip2, Dner, Cacnb4, Kif26b, D430041D05Rik, Naaladl2, Sgcz, Brinp1, Xkr6, Atp8a2, Stxbp1, Dnajc6, Brinp3, Rps2, Diaph2, Igsf8, Rpsa, Plcl1, Ubc, Ifitm3, Epas1, Cobll1, Rps4x, Actb, Rpl3, Cfl1, Cdc42, Spock2, ENSMUSG00000040904, Rps29, Rps24, B2m, Atp6v0c, Rap1a, R…	1619
GO:0048172	regulation of short-term neuronal synapt...	5	1	0.45	0.37352	0.37352	3dpi	BP	NonN_8	GO:0048172	Grik1	144	Kcnb2, Rbfox3, Cdh18, Hs3st4, Grik1, Trhde, Dpp6, Sgcd, Pcdh10, Ntrk3, Slc8a3, Pcdh11x, Upp2, Meg3, Samd4, Cntnap2, Tmem132b, Mctp1, Jakmip2, Dner, Cacnb4, Kif26b, D430041D05Rik, Naaladl2, Sgcz, Brinp1, Xkr6, Atp8a2, Stxbp1, Dnajc6, Brinp3, Rps2, Diaph2, Igsf8, Rpsa, Plcl1, Ubc, Ifitm3, Epas1, Cobll1, Rps4x, Actb, Rpl3, Cfl1, Cdc42, Spock2, ENSMUSG00000040904, Rps29, Rps24, B2m, Atp6v0c, Rap1a, R…	1619
GO:0048712	negative regulation of astrocyte differe...	5	1	0.45	0.37352	0.37352	3dpi	BP	NonN_8	GO:0048712	Ntrk3	144	Kcnb2, Rbfox3, Cdh18, Hs3st4, Grik1, Trhde, Dpp6, Sgcd, Pcdh10, Ntrk3, Slc8a3, Pcdh11x, Upp2, Meg3, Samd4, Cntnap2, Tmem132b, Mctp1, Jakmip2, Dner, Cacnb4, Kif26b, D430041D05Rik, Naaladl2, Sgcz, Brinp1, Xkr6, Atp8a2, Stxbp1, Dnajc6, Brinp3, Rps2, Diaph2, Igsf8, Rpsa, Plcl1, Ubc, Ifitm3, Epas1, Cobll1, Rps4x, Actb, Rpl3, Cfl1, Cdc42, Spock2, ENSMUSG00000040904, Rps29, Rps24, B2m, Atp6v0c, Rap1a, R…	1619
GO:0048741	skeletal muscle fiber development	5	1	0.45	0.37352	0.37352	3dpi	BP	NonN_8	GO:0048741	Dner	144	Kcnb2, Rbfox3, Cdh18, Hs3st4, Grik1, Trhde, Dpp6, Sgcd, Pcdh10, Ntrk3, Slc8a3, Pcdh11x, Upp2, Meg3, Samd4, Cntnap2, Tmem132b, Mctp1, Jakmip2, Dner, Cacnb4, Kif26b, D430041D05Rik, Naaladl2, Sgcz, Brinp1, Xkr6, Atp8a2, Stxbp1, Dnajc6, Brinp3, Rps2, Diaph2, Igsf8, Rpsa, Plcl1, Ubc, Ifitm3, Epas1, Cobll1, Rps4x, Actb, Rpl3, Cfl1, Cdc42, Spock2, ENSMUSG00000040904, Rps29, Rps24, B2m, Atp6v0c, Rap1a, R…	1619
GO:0050672	negative regulation of lymphocyte prolif...	5	1	0.45	0.37352	0.37352	3dpi	BP	NonN_8	GO:0050672	Ndfip1	144	Kcnb2, Rbfox3, Cdh18, Hs3st4, Grik1, Trhde, Dpp6, Sgcd, Pcdh10, Ntrk3, Slc8a3, Pcdh11x, Upp2, Meg3, Samd4, Cntnap2, Tmem132b, Mctp1, Jakmip2, Dner, Cacnb4, Kif26b, D430041D05Rik, Naaladl2, Sgcz, Brinp1, Xkr6, Atp8a2, Stxbp1, Dnajc6, Brinp3, Rps2, Diaph2, Igsf8, Rpsa, Plcl1, Ubc, Ifitm3, Epas1, Cobll1, Rps4x, Actb, Rpl3, Cfl1, Cdc42, Spock2, ENSMUSG00000040904, Rps29, Rps24, B2m, Atp6v0c, Rap1a, R…	1619
GO:0050779	RNA destabilization	5	1	0.45	0.37352	0.37352	3dpi	BP	NonN_8	GO:0050779	Samd4	144	Kcnb2, Rbfox3, Cdh18, Hs3st4, Grik1, Trhde, Dpp6, Sgcd, Pcdh10, Ntrk3, Slc8a3, Pcdh11x, Upp2, Meg3, Samd4, Cntnap2, Tmem132b, Mctp1, Jakmip2, Dner, Cacnb4, Kif26b, D430041D05Rik, Naaladl2, Sgcz, Brinp1, Xkr6, Atp8a2, Stxbp1, Dnajc6, Brinp3, Rps2, Diaph2, Igsf8, Rpsa, Plcl1, Ubc, Ifitm3, Epas1, Cobll1, Rps4x, Actb, Rpl3, Cfl1, Cdc42, Spock2, ENSMUSG00000040904, Rps29, Rps24, B2m, Atp6v0c, Rap1a, R…	1619
GO:0050850	positive regulation of calcium-mediated ...	5	1	0.45	0.37352	0.37352	3dpi	BP	NonN_8	GO:0050850	Hint1	144	Kcnb2, Rbfox3, Cdh18, Hs3st4, Grik1, Trhde, Dpp6, Sgcd, Pcdh10, Ntrk3, Slc8a3, Pcdh11x, Upp2, Meg3, Samd4, Cntnap2, Tmem132b, Mctp1, Jakmip2, Dner, Cacnb4, Kif26b, D430041D05Rik, Naaladl2, Sgcz, Brinp1, Xkr6, Atp8a2, Stxbp1, Dnajc6, Brinp3, Rps2, Diaph2, Igsf8, Rpsa, Plcl1, Ubc, Ifitm3, Epas1, Cobll1, Rps4x, Actb, Rpl3, Cfl1, Cdc42, Spock2, ENSMUSG00000040904, Rps29, Rps24, B2m, Atp6v0c, Rap1a, R…	1619
GO:0050869	negative regulation of B cell activation	5	1	0.45	0.37352	0.37352	3dpi	BP	NonN_8	GO:0050869	Ndfip1	144	Kcnb2, Rbfox3, Cdh18, Hs3st4, Grik1, Trhde, Dpp6, Sgcd, Pcdh10, Ntrk3, Slc8a3, Pcdh11x, Upp2, Meg3, Samd4, Cntnap2, Tmem132b, Mctp1, Jakmip2, Dner, Cacnb4, Kif26b, D430041D05Rik, Naaladl2, Sgcz, Brinp1, Xkr6, Atp8a2, Stxbp1, Dnajc6, Brinp3, Rps2, Diaph2, Igsf8, Rpsa, Plcl1, Ubc, Ifitm3, Epas1, Cobll1, Rps4x, Actb, Rpl3, Cfl1, Cdc42, Spock2, ENSMUSG00000040904, Rps29, Rps24, B2m, Atp6v0c, Rap1a, R…	1619
GO:0051016	barbed-end actin filament capping	5	1	0.45	0.37352	0.37352	3dpi	BP	NonN_8	GO:0051016	Cfl1	144	Kcnb2, Rbfox3, Cdh18, Hs3st4, Grik1, Trhde, Dpp6, Sgcd, Pcdh10, Ntrk3, Slc8a3, Pcdh11x, Upp2, Meg3, Samd4, Cntnap2, Tmem132b, Mctp1, Jakmip2, Dner, Cacnb4, Kif26b, D430041D05Rik, Naaladl2, Sgcz, Brinp1, Xkr6, Atp8a2, Stxbp1, Dnajc6, Brinp3, Rps2, Diaph2, Igsf8, Rpsa, Plcl1, Ubc, Ifitm3, Epas1, Cobll1, Rps4x, Actb, Rpl3, Cfl1, Cdc42, Spock2, ENSMUSG00000040904, Rps29, Rps24, B2m, Atp6v0c, Rap1a, R…	1619
GO:0051645	Golgi localization	5	1	0.45	0.37352	0.37352	3dpi	BP	NonN_8	GO:0051645	Cdc42	144	Kcnb2, Rbfox3, Cdh18, Hs3st4, Grik1, Trhde, Dpp6, Sgcd, Pcdh10, Ntrk3, Slc8a3, Pcdh11x, Upp2, Meg3, Samd4, Cntnap2, Tmem132b, Mctp1, Jakmip2, Dner, Cacnb4, Kif26b, D430041D05Rik, Naaladl2, Sgcz, Brinp1, Xkr6, Atp8a2, Stxbp1, Dnajc6, Brinp3, Rps2, Diaph2, Igsf8, Rpsa, Plcl1, Ubc, Ifitm3, Epas1, Cobll1, Rps4x, Actb, Rpl3, Cfl1, Cdc42, Spock2, ENSMUSG00000040904, Rps29, Rps24, B2m, Atp6v0c, Rap1a, R…	1619
GO:0051973	positive regulation of telomerase activi...	5	1	0.45	0.37352	0.37352	3dpi	BP	NonN_8	GO:0051973	Hsp90ab1	144	Kcnb2, Rbfox3, Cdh18, Hs3st4, Grik1, Trhde, Dpp6, Sgcd, Pcdh10, Ntrk3, Slc8a3, Pcdh11x, Upp2, Meg3, Samd4, Cntnap2, Tmem132b, Mctp1, Jakmip2, Dner, Cacnb4, Kif26b, D430041D05Rik, Naaladl2, Sgcz, Brinp1, Xkr6, Atp8a2, Stxbp1, Dnajc6, Brinp3, Rps2, Diaph2, Igsf8, Rpsa, Plcl1, Ubc, Ifitm3, Epas1, Cobll1, Rps4x, Actb, Rpl3, Cfl1, Cdc42, Spock2, ENSMUSG00000040904, Rps29, Rps24, B2m, Atp6v0c, Rap1a, R…	1619
GO:0060135	maternal process involved in female preg...	5	1	0.45	0.37352	0.37352	3dpi	BP	NonN_8	GO:0060135	Ptn	144	Kcnb2, Rbfox3, Cdh18, Hs3st4, Grik1, Trhde, Dpp6, Sgcd, Pcdh10, Ntrk3, Slc8a3, Pcdh11x, Upp2, Meg3, Samd4, Cntnap2, Tmem132b, Mctp1, Jakmip2, Dner, Cacnb4, Kif26b, D430041D05Rik, Naaladl2, Sgcz, Brinp1, Xkr6, Atp8a2, Stxbp1, Dnajc6, Brinp3, Rps2, Diaph2, Igsf8, Rpsa, Plcl1, Ubc, Ifitm3, Epas1, Cobll1, Rps4x, Actb, Rpl3, Cfl1, Cdc42, Spock2, ENSMUSG00000040904, Rps29, Rps24, B2m, Atp6v0c, Rap1a, R…	1619
GO:0060219	camera-type eye photoreceptor cell diffe...	5	1	0.45	0.37352	0.37352	3dpi	BP	NonN_8	GO:0060219	Ptn	144	Kcnb2, Rbfox3, Cdh18, Hs3st4, Grik1, Trhde, Dpp6, Sgcd, Pcdh10, Ntrk3, Slc8a3, Pcdh11x, Upp2, Meg3, Samd4, Cntnap2, Tmem132b, Mctp1, Jakmip2, Dner, Cacnb4, Kif26b, D430041D05Rik, Naaladl2, Sgcz, Brinp1, Xkr6, Atp8a2, Stxbp1, Dnajc6, Brinp3, Rps2, Diaph2, Igsf8, Rpsa, Plcl1, Ubc, Ifitm3, Epas1, Cobll1, Rps4x, Actb, Rpl3, Cfl1, Cdc42, Spock2, ENSMUSG00000040904, Rps29, Rps24, B2m, Atp6v0c, Rap1a, R…	1619
GO:0060294	cilium movement involved in cell motilit...	5	1	0.45	0.37352	0.37352	3dpi	BP	NonN_8	GO:0060294	Pltp	144	Kcnb2, Rbfox3, Cdh18, Hs3st4, Grik1, Trhde, Dpp6, Sgcd, Pcdh10, Ntrk3, Slc8a3, Pcdh11x, Upp2, Meg3, Samd4, Cntnap2, Tmem132b, Mctp1, Jakmip2, Dner, Cacnb4, Kif26b, D430041D05Rik, Naaladl2, Sgcz, Brinp1, Xkr6, Atp8a2, Stxbp1, Dnajc6, Brinp3, Rps2, Diaph2, Igsf8, Rpsa, Plcl1, Ubc, Ifitm3, Epas1, Cobll1, Rps4x, Actb, Rpl3, Cfl1, Cdc42, Spock2, ENSMUSG00000040904, Rps29, Rps24, B2m, Atp6v0c, Rap1a, R…	1619
GO:0060368	regulation of Fc receptor mediated stimu...	5	1	0.45	0.37352	0.37352	3dpi	BP	NonN_8	GO:0060368	Rap1a	144	Kcnb2, Rbfox3, Cdh18, Hs3st4, Grik1, Trhde, Dpp6, Sgcd, Pcdh10, Ntrk3, Slc8a3, Pcdh11x, Upp2, Meg3, Samd4, Cntnap2, Tmem132b, Mctp1, Jakmip2, Dner, Cacnb4, Kif26b, D430041D05Rik, Naaladl2, Sgcz, Brinp1, Xkr6, Atp8a2, Stxbp1, Dnajc6, Brinp3, Rps2, Diaph2, Igsf8, Rpsa, Plcl1, Ubc, Ifitm3, Epas1, Cobll1, Rps4x, Actb, Rpl3, Cfl1, Cdc42, Spock2, ENSMUSG00000040904, Rps29, Rps24, B2m, Atp6v0c, Rap1a, R…	1619
GO:0060369	positive regulation of Fc receptor media...	5	1	0.45	0.37352	0.37352	3dpi	BP	NonN_8	GO:0060369	Rap1a	144	Kcnb2, Rbfox3, Cdh18, Hs3st4, Grik1, Trhde, Dpp6, Sgcd, Pcdh10, Ntrk3, Slc8a3, Pcdh11x, Upp2, Meg3, Samd4, Cntnap2, Tmem132b, Mctp1, Jakmip2, Dner, Cacnb4, Kif26b, D430041D05Rik, Naaladl2, Sgcz, Brinp1, Xkr6, Atp8a2, Stxbp1, Dnajc6, Brinp3, Rps2, Diaph2, Igsf8, Rpsa, Plcl1, Ubc, Ifitm3, Epas1, Cobll1, Rps4x, Actb, Rpl3, Cfl1, Cdc42, Spock2, ENSMUSG00000040904, Rps29, Rps24, B2m, Atp6v0c, Rap1a, R…	1619
GO:0060675	ureteric bud morphogenesis	5	1	0.45	0.37352	0.37352	3dpi	BP	NonN_8	GO:0060675	Kif26b	144	Kcnb2, Rbfox3, Cdh18, Hs3st4, Grik1, Trhde, Dpp6, Sgcd, Pcdh10, Ntrk3, Slc8a3, Pcdh11x, Upp2, Meg3, Samd4, Cntnap2, Tmem132b, Mctp1, Jakmip2, Dner, Cacnb4, Kif26b, D430041D05Rik, Naaladl2, Sgcz, Brinp1, Xkr6, Atp8a2, Stxbp1, Dnajc6, Brinp3, Rps2, Diaph2, Igsf8, Rpsa, Plcl1, Ubc, Ifitm3, Epas1, Cobll1, Rps4x, Actb, Rpl3, Cfl1, Cdc42, Spock2, ENSMUSG00000040904, Rps29, Rps24, B2m, Atp6v0c, Rap1a, R…	1619
GO:0061154	endothelial tube morphogenesis	5	1	0.45	0.37352	0.37352	3dpi	BP	NonN_8	GO:0061154	Bsg	144	Kcnb2, Rbfox3, Cdh18, Hs3st4, Grik1, Trhde, Dpp6, Sgcd, Pcdh10, Ntrk3, Slc8a3, Pcdh11x, Upp2, Meg3, Samd4, Cntnap2, Tmem132b, Mctp1, Jakmip2, Dner, Cacnb4, Kif26b, D430041D05Rik, Naaladl2, Sgcz, Brinp1, Xkr6, Atp8a2, Stxbp1, Dnajc6, Brinp3, Rps2, Diaph2, Igsf8, Rpsa, Plcl1, Ubc, Ifitm3, Epas1, Cobll1, Rps4x, Actb, Rpl3, Cfl1, Cdc42, Spock2, ENSMUSG00000040904, Rps29, Rps24, B2m, Atp6v0c, Rap1a, R…	1619
GO:0061157	mRNA destabilization	5	1	0.45	0.37352	0.37352	3dpi	BP	NonN_8	GO:0061157	Samd4	144	Kcnb2, Rbfox3, Cdh18, Hs3st4, Grik1, Trhde, Dpp6, Sgcd, Pcdh10, Ntrk3, Slc8a3, Pcdh11x, Upp2, Meg3, Samd4, Cntnap2, Tmem132b, Mctp1, Jakmip2, Dner, Cacnb4, Kif26b, D430041D05Rik, Naaladl2, Sgcz, Brinp1, Xkr6, Atp8a2, Stxbp1, Dnajc6, Brinp3, Rps2, Diaph2, Igsf8, Rpsa, Plcl1, Ubc, Ifitm3, Epas1, Cobll1, Rps4x, Actb, Rpl3, Cfl1, Cdc42, Spock2, ENSMUSG00000040904, Rps29, Rps24, B2m, Atp6v0c, Rap1a, R…	1619
GO:0070169	positive regulation of biomineral tissue...	5	1	0.45	0.37352	0.37352	3dpi	BP	NonN_8	GO:0070169	Ptn	144	Kcnb2, Rbfox3, Cdh18, Hs3st4, Grik1, Trhde, Dpp6, Sgcd, Pcdh10, Ntrk3, Slc8a3, Pcdh11x, Upp2, Meg3, Samd4, Cntnap2, Tmem132b, Mctp1, Jakmip2, Dner, Cacnb4, Kif26b, D430041D05Rik, Naaladl2, Sgcz, Brinp1, Xkr6, Atp8a2, Stxbp1, Dnajc6, Brinp3, Rps2, Diaph2, Igsf8, Rpsa, Plcl1, Ubc, Ifitm3, Epas1, Cobll1, Rps4x, Actb, Rpl3, Cfl1, Cdc42, Spock2, ENSMUSG00000040904, Rps29, Rps24, B2m, Atp6v0c, Rap1a, R…	1619
GO:0070306	lens fiber cell differentiation	5	1	0.45	0.37352	0.37352	3dpi	BP	NonN_8	GO:0070306	Ntrk3	144	Kcnb2, Rbfox3, Cdh18, Hs3st4, Grik1, Trhde, Dpp6, Sgcd, Pcdh10, Ntrk3, Slc8a3, Pcdh11x, Upp2, Meg3, Samd4, Cntnap2, Tmem132b, Mctp1, Jakmip2, Dner, Cacnb4, Kif26b, D430041D05Rik, Naaladl2, Sgcz, Brinp1, Xkr6, Atp8a2, Stxbp1, Dnajc6, Brinp3, Rps2, Diaph2, Igsf8, Rpsa, Plcl1, Ubc, Ifitm3, Epas1, Cobll1, Rps4x, Actb, Rpl3, Cfl1, Cdc42, Spock2, ENSMUSG00000040904, Rps29, Rps24, B2m, Atp6v0c, Rap1a, R…	1619
GO:0070633	transepithelial transport	5	1	0.45	0.37352	0.37352	3dpi	BP	NonN_8	GO:0070633	Actb	144	Kcnb2, Rbfox3, Cdh18, Hs3st4, Grik1, Trhde, Dpp6, Sgcd, Pcdh10, Ntrk3, Slc8a3, Pcdh11x, Upp2, Meg3, Samd4, Cntnap2, Tmem132b, Mctp1, Jakmip2, Dner, Cacnb4, Kif26b, D430041D05Rik, Naaladl2, Sgcz, Brinp1, Xkr6, Atp8a2, Stxbp1, Dnajc6, Brinp3, Rps2, Diaph2, Igsf8, Rpsa, Plcl1, Ubc, Ifitm3, Epas1, Cobll1, Rps4x, Actb, Rpl3, Cfl1, Cdc42, Spock2, ENSMUSG00000040904, Rps29, Rps24, B2m, Atp6v0c, Rap1a, R…	1619
GO:0070828	heterochromatin organization	5	1	0.45	0.37352	0.37352	3dpi	BP	NonN_8	GO:0070828	H3f3b	144	Kcnb2, Rbfox3, Cdh18, Hs3st4, Grik1, Trhde, Dpp6, Sgcd, Pcdh10, Ntrk3, Slc8a3, Pcdh11x, Upp2, Meg3, Samd4, Cntnap2, Tmem132b, Mctp1, Jakmip2, Dner, Cacnb4, Kif26b, D430041D05Rik, Naaladl2, Sgcz, Brinp1, Xkr6, Atp8a2, Stxbp1, Dnajc6, Brinp3, Rps2, Diaph2, Igsf8, Rpsa, Plcl1, Ubc, Ifitm3, Epas1, Cobll1, Rps4x, Actb, Rpl3, Cfl1, Cdc42, Spock2, ENSMUSG00000040904, Rps29, Rps24, B2m, Atp6v0c, Rap1a, R…	1619
[truncated: 297,656+ more rows]
