# Supplementary material for: Molecular Consequences of Peripheral Influenza A Infection on Cell Populations in the Murine Hypothalamus
Source: bioRxiv preprint, doi:10.1101/2023.03.06.530999, version 2 (2023-06-19)
Supplement: Supplemental Table 9 [file 530999_file11.xlsx]

## Sheet: Program scores UMAP embeddings
3 dpi	gene programs	TP0_TTCGATTCACACGGAA	TP0_TGACCCTAGGCCATAG	TP0_CGTGAATAGAGTTGAT	TP0_GAAGAATTCTTTCTAG	TP0_ACCATTTAGCTTTGTG	TP0_GGTCTGGGTCTTGCGG	TP0_GCATTAGTCCGAGAAG	TP0_TCAAGCACACGCGTCA	TP0_AATGAAGGTTCAACGT	TP0_CTGGTCTCAGAACATA	TP0_TAAGTCGAGTGAATAC	TP0_ACTTTGTAGCATATGA	TP0_TCGCACTAGAGAAGGT	TP0_GTCTACCCAGAGTCTT	TP0_CCAATGAAGGTCGACA	TP0_CACTTCGCATGTTCAG	TP0_GACCCAGTCACGTCCT	TP0_CTGTGGGGTAATTGGA	TP0_GTAATCGTCGCAGTGC	TP0_TTTGACTAGTCGTTAC	TP0_TCATTCAAGGGTCACA	TP0_GACGCTGTCAATCCAG	TP0_GCGGATCAGCCTGAGA	TP0_AAGACTCAGGCTATCT	TP0_ACAAAGATCATTCACT	TP0_CACACAATCGAAGTGG	TP0_CTTGAGATCTGCCTCA	TP0_AACCTGATCTTTACAC	TP0_CCTCCAATCAGGACGA	TP0_GGGATCCAGACAACTA	TP0_AGTAGTCTCACCTACC	TP0_AGGCTGCGTGCAGGAT	TP0_AAGACTCCATCATCCC	TP0_TCGGGCAGTGCCTATA	TP0_ACATGCACATGCCATA	TP0_TCCTAATGTACGGATG	TP0_GGTGGCTAGCAGCGAT	TP0_AGTCAACTCGTGAGAG	TP0_GCACATACAACGATCT	TP0_TACGGGCCAAGTTGGG	TP0_ATCGTAGCAACATACC	TP0_CATGCGGTCCGACAGC	TP0_ACTGTCCTCACAATGC	TP0_GGTGGCTGTTCCTAAG	TP0_AGCGCTGAGGTTCACT	TP0_TGAACGTGTGTGGTCC	TP0_CAAGGGAAGAGAGCGG	TP0_GACACGCAGTTTGAGA
	0	-0.0830621	-0.0225233	-0.0499583	-0.0135331	-0.077729	-0.622241	-0.444888	-0.131757	-0.111967	-0.29794	-0.429479	-0.0653232	-0.516982	-0.651497	-0.486329	-0.00605658	-0.0520697	-0.135298	-0.252819	-0.00392199	-0.213444	-0.10509	-0.0394264	0	-0.246977	-0.254021	-0.601875	-0.0629253	-0.0497053	-0.0709784	-0.358652	-0.216454	-0.213397	-0.210378	-0.154269	-0.244837	-0.0326683	-0.172211	-0.0154193	-0.0572769	-0.19579	-0.0614079	-0.299155	-0.306848	-0.194963	-0.092802	-0.129113	-0.0441817
	1	0	0.0183638	0.0161516	0	0	0.0148883	0.0361145	0	0	0	0	0	0.0738949	0.185026	0.00738456	0	0	0	0	0	0	0	0	0	0	0	0.0285054	0	0	0.0211103	0	0.0325792	0.0243349	0.0230079	0	0	0	0	0.00354964	0	0	0	0	0.00374008	0.0168129	0	0	0
	2	0	0	0	0	0	0	0	0	0	0	0	0	0	0	0	0	0	0	0	0	0	0	0	0	0	0	0	0	0	0	0	0	0	0	0	0	0	0	0	0	0	0	0	0	0	0	0	0
	3	0	0	0	0	0	0	0	0	0	0	0	0	0	0	0	0	0	0	0	0	0	0	0	0	0	0	0	0	0	0	0	0	0	0	0	0	0	0	0	0	0	0	0	0	0	0	0	0
	4	0	0	0	0	0	0	0	0	0	0	0	0	0	0	0	0	0	0	0	0	0	0	0	0	0	0	0	0	0	0	0	0	0	0	0	0	0	0	0	0	0	0	0	0	0	0	0	0
	5	0	0	0	0	0	0	0	0	0	0	0	0	0	0	0	0	0	0	0	0	0	0	0	0	0	0	0	0	0	0	0	0	0	0	0	0	0	0	0	0	0	0	0	0	0	0	0	0
	6	0	0	0	0	0	0	0	0	0	0	0	0	0	0	0	0	0	0	0	0	0	0	0	0	0	0	0	0	0	0	0	0	0	0	0	0	0	0	0	0	0	0	0	0	0	0	0	0
	7	0	0	0	0	0	0	0	0	0	0	0	0	0	0	0	0	0	0	0	0	0	0	0	0	0	0	0	0	0	0	0	0	0	0	0	0	0	0	0	0	0	0	0	0	0	0	0	0
7 dpi	gene programs	TP0_TTCGATTCACACGGAA	TP0_TGACCCTAGGCCATAG	TP0_CGTGAATAGAGTTGAT	TP0_GAAGAATTCTTTCTAG	TP0_ACCATTTAGCTTTGTG	TP0_GGTCTGGGTCTTGCGG	TP0_GCATTAGTCCGAGAAG	TP0_TCAAGCACACGCGTCA	TP0_AATGAAGGTTCAACGT	TP0_CTGGTCTCAGAACATA	TP0_TAAGTCGAGTGAATAC	TP0_ACTTTGTAGCATATGA	TP0_TCGCACTAGAGAAGGT	TP0_GTCTACCCAGAGTCTT	TP0_CCAATGAAGGTCGACA	TP0_CACTTCGCATGTTCAG	TP0_GACCCAGTCACGTCCT	TP0_CTGTGGGGTAATTGGA	TP0_GTAATCGTCGCAGTGC	TP0_TTTGACTAGTCGTTAC	TP0_TCATTCAAGGGTCACA	TP0_GACGCTGTCAATCCAG	TP0_GCGGATCAGCCTGAGA	TP0_ACAAAGATCATTCACT	TP0_CACACAATCGAAGTGG	TP0_CTTGAGATCTGCCTCA	TP0_AACCTGATCTTTACAC	TP0_CCTCCAATCAGGACGA	TP0_GGGATCCAGACAACTA	TP0_AGTAGTCTCACCTACC	TP0_AGGCTGCGTGCAGGAT	TP0_AAGACTCCATCATCCC	TP0_TCGGGCAGTGCCTATA	TP0_ACATGCACATGCCATA	TP0_TCCTAATGTACGGATG	TP0_GGTGGCTAGCAGCGAT	TP0_AGTCAACTCGTGAGAG	TP0_GCACATACAACGATCT	TP0_TACGGGCCAAGTTGGG	TP0_ATCGTAGCAACATACC	TP0_CATGCGGTCCGACAGC	TP0_ACTGTCCTCACAATGC	TP0_GGTGGCTGTTCCTAAG	TP0_AGCGCTGAGGTTCACT	TP0_TGAACGTGTGTGGTCC	TP0_CAAGGGAAGAGAGCGG	TP0_GACACGCAGTTTGAGA	TP0_TGACAGTTCGGCTGAC
	0	-0.0841391	0	-0.881855	-0.038006	-0.0316497	-1.39934	-0.968046	-0.840325	-0.211112	-0.753322	-0.221368	-0.109857	-1.28944	-1.5091	-1.02643	-0.00928464	-0.53689	-0.0194726	-0.564157	-0.0258746	-0.41831	-0.240488	-0.0827137	-0.156248	-0.509297	-0.762288	-0.0613119	-0.0743481	-0.0667494	-0.445334	-1.3351	-0.21657	-0.471324	-0.24821	-0.367315	-0.0544046	-0.729513	-0.0961082	0	-0.490746	-0.1528	-0.18151	-0.502862	-0.483069	-0.10915	-0.276091	-0.350676	-0.229851
	1	0	0	0	0	0	0	0	0	0	0	0	0	0	0	0	0	0	0	0	0	0	0	0	0	0	0	0	0	0	0	0	0	0	0	0	0	0	0	0	0	0	0	0	0	0	0	0	0
	2	0	0	0	0	0	0	0	0	0	0	0	0	0	0	0	0	0	0	0	0	0	0	0	0	0	0	0	0	0	0	0	0	0	0	0	0	0	0	0	0	0	0	0	0	0	0	0	0
	3	0.0809026	0.203461	0.136836	0	0	0.17755	0.0946276	0.0477542	0	0.0435794	0	0	0.337024	0.36855	0.0196128	0	0.0412099	0	0.0639031	0	0.0180041	0.0115247	0	0.04825	0.175575	0.193265	0	0.13428	0.128238	0.11207	0.103304	0.0934784	0.356694	0.0609868	0	0	0.0530161	0	0	0.00780956	0.0855136	0.0420852	0.150478	0.201793	0.128578	0	0	0
	4	0	0	0	0	0	0	0	0	0	0	0	0	0	0	0	0	0	0	0	0	0	0	0	0	0	0	0	0	0	0	0	0	0	0	0	0	0	0	0	0	0	0	0	0	0	0	0	0
	5	0	0	0	0	0	0	0	0	0	0	0	0	0	0	0	0	0	0	0	0	0	0	0	0	0	0	0	0	0	0	0	0	0	0	0	0	0	0	0	0	0	0	0	0	0	0	0	0
	6	0	0	0	0	0	0	0	0	0	0	0	0	0	0	0	0	0	0	0	0	0	0	0	0	0	0	0	0	0	0	0	0	0	0	0	0	0	0	0	0	0	0	0	0	0	0	0	0
	7	0	0	0	0	0	0	0	0	0	0	0	0	0	0	0	0	0	0	0	0	0	0	0	0	0	0	0	0	0	0	0	0	0	0	0	0	0	0	0	0	0	0	0	0	0	0	0	0
	8	0	0	0	0	0	0	0	0	0	0	0	0	0	0	0	0	0	0	0	0	0	0	0	0	0	0	0	0	0	0	0	0	0	0	0	0	0	0	0	0	0	0	0	0	0	0	0	0
	9	0	0	0	0	0	0	0	0	0	0	0	0	0	0	0	0	0	0	0	0	0	0	0	0	0	0	0	0	0	0	0	0	0	0	0	0	0	0	0	0	0	0	0	0	0	0	0	0
23 dpi	gene programs	TP0_TTCGATTCACACGGAA	TP0_TGACCCTAGGCCATAG	TP0_CGTGAATAGAGTTGAT	TP0_GAAGAATTCTTTCTAG	TP0_ACCATTTAGCTTTGTG	TP0_GGTCTGGGTCTTGCGG	TP0_GCATTAGTCCGAGAAG	TP0_TCAAGCACACGCGTCA	TP0_AATGAAGGTTCAACGT	TP0_CTGGTCTCAGAACATA	TP0_TAAGTCGAGTGAATAC	TP0_ACTTTGTAGCATATGA	TP0_TCGCACTAGAGAAGGT	TP0_GTCTACCCAGAGTCTT	TP0_CCAATGAAGGTCGACA	TP0_CACTTCGCATGTTCAG	TP0_GACCCAGTCACGTCCT	TP0_CTGTGGGGTAATTGGA	TP0_GTAATCGTCGCAGTGC	TP0_TTTGACTAGTCGTTAC	TP0_GACGCTGTCAATCCAG	TP0_GCGGATCAGCCTGAGA	TP0_AAGACTCAGGCTATCT	TP0_CACACAATCGAAGTGG	TP0_CTTGAGATCTGCCTCA	TP0_AACCTGATCTTTACAC	TP0_CCTCCAATCAGGACGA	TP0_GGGATCCAGACAACTA	TP0_CACTGAATCTTGAGCA	TP0_AGTAGTCTCACCTACC	TP0_AGGCTGCGTGCAGGAT	TP0_AAGACTCCATCATCCC	TP0_TCGGGCAGTGCCTATA	TP0_ACATGCACATGCCATA	TP0_TCCTAATGTACGGATG	TP0_GGTGGCTAGCAGCGAT	TP0_AGTCAACTCGTGAGAG	TP0_GCACATACAACGATCT	TP0_TACGGGCCAAGTTGGG	TP0_ATCGTAGCAACATACC	TP0_CATGCGGTCCGACAGC	TP0_ACTGTCCTCACAATGC	TP0_GGTGGCTGTTCCTAAG	TP0_AGCGCTGAGGTTCACT	TP0_TGAACGTGTGTGGTCC	TP0_GACACGCAGTTTGAGA	TP0_TGACAGTTCGGCTGAC	TP0_GTATTTCAGGGCAGGA
	0	0	0	0	0	0	0	0	0	0	0	0	0	0	0	0	0	0	0	0	0	0	0	0	0	0	0	0	0	0	0.00608705	0	0	0	0	0	0	0	0	0	0	0	0	0	0	0	0	0	0
	1	-0.0814811	-0.104135	-0.861842	-0.0625655	-0.0957718	-1.1472	-0.593021	-0.587346	-0.288286	-0.274937	-0.190324	-0.121416	-1.0781	-0.865208	-1.14004	-0.0476045	-0.145992	-0.450336	-0.738762	-0.0371989	-0.179444	-0.246137	0	-0.427356	-0.68705	-0.108953	-0.083546	-0.186478	-0.260048	-0.452364	-1.47916	-0.254289	-0.828171	-0.0850979	-0.611559	-0.0105278	-0.519101	-0.171686	-0.00519456	-0.0701144	0	-0.501831	-0.6007	-0.520476	0	-0.648078	-0.487424	-0.107618
	2	0	0	0	0	0	0	0	0	0	0	0	0	0	0	0	0	0	0	0	0	0	0	0	0	0	0	0	0	0	0	0	0	0	0	0	0	0	0	0	0	0	0	0	0	0	0	0	0
	3	0	0	0	0	0	0	0	0	0	0	0	0	0	0	0	0	0	0	0	0	0	0	0	0	0	0	0	0	0	0	0	0	0	0	0	0	0	0	0	0	0	0	0	0	0	0	0	0
	4	0	0	0	0	0	0	0	0	0	0	0	0	0	0	0	0	0	0	0	0	0	0	0	0	0	0	0	0	0	0	0	0	0	0	0	0	0	0	0	0	0	0	0	0	0	0	0	0
	5	0	0	0	0	0	0	0	0	0	0	0	0	0	0	0	0	0	0	0	0	0	0	0	0	0	0	0	0	0	0	0	0	0	0	0	0	0	0	0	0	0	0	0	0	0	0	0	0
	6	0	0	0	0	0	0	0	0	0	0	0	0	0	0	0	0	0	0	0	0	0	0	0	0	0	0	0	0	0	0	0	0	0	0	0	0	0	0	0	0	0	0	0	0	0	0	0	0
	7	0	0	0	0	0	0	0	0	0	0	0	0	0	0	0	0	0	0	0	0	0	0	0	0	0	0	0	0	0	0	0	0	0	0	0	0	0	0	0	0	0	0	0	0	0	0	0	0
	8	0	0	0	0	0	0	0	0	0	0	0	0	0	0	0	0	0	0	0	0	0	0	0	0	0	0	0	0	0	0	0	0	0	0	0	0	0	0	0	0	0	0	0	0	0	0	0	0
[truncated: 5,000 more columns]

## Sheet: 3 dpi - gene programs
Gene Program 1				Gene Program 2				Gene Program 3				Gene Program 4				Gene Program 5				Gene Program 6				Gene Program 7				Gene Program 8				Gene Program 9
genes	sim_scores	loading_scores		genes	sim_scores	loading_scores		genes	sim_scores	loading_scores		genes	sim_scores	loading_scores		genes	sim_scores	loading_scores		genes	sim_scores	loading_scores		genes	sim_scores	loading_scores		genes	sim_scores	loading_scores		genes	sim_scores	loading_scores
4632427E13Rik	0.0604647	244.824		1110051M20Rik	0.352171	594.664		4932438A13Rik	0.27648	86.5979		5031425E22Rik	0.153845	192.461		5031439G07Rik	0.267085	189.819		2210408I21Rik	0.198647	133.657		Abcc5	0.450482	230.149		Abr	0.388393	887.575		Adam23	0.367766	254.494
9930021J03Rik	0.118271	91.0718		1500004A13Rik	0.161911	83.9137		Akap8l	0.133921	26.43		A330023F24Rik	0.233045	211.118		Acaca	0.413404	728.919		Acap2	0.594857	174.518		Abhd18	0.559991	176.669		Adk	0.317464	388.987		Aff3	0.432607	397.864
Actb	0.302552	1928.63		2310069G16Rik	0.238189	297.647		Ankrd17	0.246529	196.981		Acyp2	0.562229	238.322		Agap1	0.753865	3057.39		Adgrl3	0.0526014	116.412		Ago3	0.191144	38.3746		Astn2	0.32452	295.932		Agbl4	0.221762	233.268
Aff4	0.0712349	336.699		2610005L07Rik	0.178732	487.775		Apc	0.125492	111.6		Ambra1	0.290826	174.75		Ank	0.384957	599.914		Ahcyl2	0.595555	180.105		Akap9	0.307227	389.293		Bptf	0.427676	487.525		Anks1b	0.492703	531.917
Ahi1	0.412745	3238.2		4930402H24Rik	0.299854	1633.96		Arfgef1	0.301831	105.054		Arhgap32	0.400877	246.789		Ano4	0.615492	1315.69		Amph	0.444772	239.003		Apbb2	0.558566	292.811		Ccdc88a	0.355096	425.58		Apba1	0.260873	328.25
Aldoa	0.714125	5357.18		5330434G04Rik	0.278096	118.465		Ash1l	0.13965	89.4643		Atp9b	0.18803	46.8633		Arhgap21	0.27473	195.907		Aopep	0.476992	282.245		Arhgef11	0.588911	302.726		Chd9	0.234317	372.843		Cacna1a	0.394876	664.846
Ankrd11	0.0181907	21.1336		A230057D06Rik	0.58309	2220.04		Atad2b	0.217214	35.656		Atxn2	0.245676	158.066		Arnt2	0.215004	383.42		App	0.356621	140.334		Arih1	0.442327	157.529		Dtna	0.350721	378.799		Cntnap5a	0.31199	212.007
Aplp1	0.211131	1066.2		A330076H08Rik	0.47409	2242.95		Atrx	0.153666	158.002		Bcas3	0.229694	96.316		Atp8a1	0.574321	858.823		Arhgap39	0.234661	232.012		Asap1	0.34509	178.35		Ext1	0.210031	140.864		Dmxl1	0.27566	58.9164
Aplp2	0.18293	329.691		Aak1	0.414768	1934.77		Bicd1	0.199437	46.3076		Brd4	0.173252	97.6409		Atp9a	0.137135	97.6528		Arid1b	0.271255	292.208		Atp2a2	0.452179	56.7105		Farp1	0.537413	1720.28		Dync1i2	0.279032	69.8047
Araf	0.396528	2006.11		Acin1	0.106567	123.456		Btrc	0.0877077	67.7761		Cacnb2	0.392867	214.899		Atrn	0.351693	624.513		Atp2c1	0.208788	63.4938		Atp2b2	0.649282	283.825		Fat3	0.220345	113.116		ENSMUSG00000068151	0.332694	154.616
Arfip1.1	0.19285	835.865		Adam22	0.334021	1021.58		Cacna1d	0.19436	103.293		Cacnb4	0.822535	640.104		Baz2b	0.369227	510.951		Auts2	0.561675	593.941		Bicral	0.312726	260.721		Fmn2	0.198171	140.397		Ftx	0.546492	297.526
Arglu1	0.0744291	125.215		Adgrb3	0.287544	792.964		Camkmt	0.333571	144.165		Camk1d	0.454597	375.632		Bclaf1	0.113668	95.5001		Cacna1e	0.364647	304.903		Cadps	0.586685	470.703		Fry	0.737285	1646.85		Fut9	0.372587	201.619
Arhgap5	0.0113741	48.6298		Akap6	0.482484	2574.37		Cdan1	0.371109	104.966		Camk2d	0.29642	239.495		Bin1	0.593182	1983.35		Car10	0.378927	547.603		Cdk14	0.538506	155.151		Gabrg3	0.188083	240.064		Gapvd1	0.214177	231.404
Arhgef12	0.00134697	0		Akt3	0.216854	403.194		Cdk13	0.0469867	11.5848		Cask	0.194389	207.871		Cdc37l1	0.598813	1094.99		Ccdc85a	0.472444	396.589		Cdkal1	0.182338	65.4076		Hdac8	0.374091	781.816		Glg1	0.188604	63.5943
Arid4b	0.0399133	95.4207		Ank2	0.465735	1910.15		Cdk8	0.307162	217.148		Cdh2	0.418458	575.184		Cdc42bpa	0.78684	2665.9		Ccnl2	0.112659	46.0823		Chchd3	0.651505	285.388		Hnrnpa2b1	0.348005	297.862		Gm20498	0.12762	80.5698
Arl6ip1	0.680761	7475.37		Ank3	0.636283	3853.63		Cep350	0.134248	106.222		Celf1	0.51959	197.453		Clasp2	0.521379	1131.84		Ccny	0.246895	107.152		Chd6	0.210154	38.872		Kcnd2	0.186312	311.916		Gpc6	0.598514	86.4014
Atf2	0.045752	141.399		Ankrd12	0.283146	1217.37		Cnot2	0.0584398	8.87244		Celf2	0.241505	200.74		Ctnna3	0.585124	1060.84		Clock	0.149216	49.869		Chka	0.532911	182.391		Klf12	0.375341	425.213		Grik2	0.153325	197.319
Atp1a3	0.505432	3427.85		Arl15	0.421078	997.168		Cnot4	0.237038	84.2889		Chd2	0.228136	187.641		Daam1	0.520447	1210.66		Cntn5	0.384604	177.335		Dcc	0.585722	119.606		Lrch3	0.322724	393.982		Grin2b	0.446385	190.094
Atp1b1	0.641395	7290.7		Asic2	0.580174	2505.34		Cplane1	0.0771771	55.6033		Cntn1	0.481945	493.717		Ddx17	0.355863	526.189		Csmd1	0.521098	1041.34		Dip2c	0.372762	395.881		Lrrtm3	0.296172	263.112		Hnrnpu	0.477591	388.668
Atp2b1	0.0626443	51.7828		Astn1	0.507973	1502.39		Cul1	0.28683	82.694		Cpeb3	0.594922	446.371		Dgki	0.545804	1518.56		Csmd2	0.308344	642.643		Dock4	0.519419	264.918		Macf1	0.465895	932.968		Kif1a	0.499407	348.588
Atp6v0a1	0.14838	138.986		Atxn1	0.38478	1137.63		Dennd4a	0.341475	77.09		Crebbp	0.253505	169.306		Dip2b	0.268344	295.927		Csmd3	0.586586	346.7		Dtnb	0.349487	262.799		Mdga2	0.251925	709.55		Kmt2a	0.404228	362.042
Atp6v0b	0.625718	7024.03		Birc6	0.26506	157.727		Dock3	0.436739	141.16		Cspp1	0.264644	185.036		Dis3l2	0.257586	296.423		Ctnna2	0.434348	697.473		Ehmt1	0.377246	106.608		Mgat4c	0.192929	114.392		Lingo2	0.394449	126.482
Atp6v0c	0.735987	9710.77		Braf	0.117593	74.7773		Dok6	0.275865	54.701		Cttnbp2	0.535015	232.765		Dlg1	0.343763	416.025		Ddhd2	0.136779	73.5108		Elavl3	0.379671	346.086		Msi2	0.534625	1907.33		Mllt3	0.545998	136.458
Atpif1	0.685247	6612.42		Brinp3	0.24642	340.328		Dyrk1a	0.201281	109.582		Cux1	0.548283	326.456		Dock10	0.532734	1153.31		Dennd1a	0.308186	280.862		Gprasp1	0.553549	253.333		Npas3	0.456151	1577.83		Myt1l	0.365245	532.06
Atxn10	0.137734	298.682		Brwd1	0.14835	514.085		Dzip3	0.0837429	16.3574		Cyrib	0.300602	215.817		Dock9	0.390683	427.186		Dlgap1	0.565207	930.3		Gtf2i	0.405698	221.232		Nrcam	0.231661	61.3272		Nav1	0.327707	267.86
B3galt1	0.0861315	71.1956		Btbd9	0.500739	1230.99		Ecpas	0.0657472	53.3929		Dcaf6	0.592153	479.174		Elmo1	0.841598	3905.68		Dnajc6	0.348319	409.552		Itsn1	0.382508	226.145		Nrxn2	0.524955	539.423		Ncam2	0.28136	164.021
Basp1	0.640771	6201.31		C2cd5	0.354858	1749.4		ENSMUSG00000098302	0.23286	33.9275		Dpp10	0.223066	142.045		Erbb4	0.122448	84.4662		Eif4g3	0.434814	545.173		Kidins220	0.251084	134.435		Opcml	0.312743	413.496		Nkain2	0.7029	303.584
Bcl2l2.1	0.161961	731.326		Cacna1b	0.427973	2440.74		ENSMUSG00000102836	0.0679359	35.2311		Edil3	0.256439	65.171		Exoc6b	0.491409	1178.4		ENSMUSG00000096780	0.450344	286.39		Klc1	0.422971	122.947		Phactr3	0.406585	504.986		Nol4	0.251815	88.589
Bhlhb9	0.203573	306.746		Cacna1c	0.522306	3277.13		ENSMUSG00000103125	0.0848117	62.9011		Ehbp1	0.637871	359.439		Fgfr2	0.272677	102.177		Fars2	0.535222	313.617		Lrba	0.312303	99.2807		Phf21a	0.305305	618.364		Ntm	0.577803	453.884
Bsg	0.684798	7735.7		Cadm1	0.500408	1384.9		Epb41l3	0.087451	101.801		Enah	0.577987	434.948		Fnbp1	0.767682	1974.85		Fmnl2	0.467396	240.591		Mark3	0.28009	220.607		Pid1	0.124306	223.897		Ogt	0.246317	85.3486
Cadm2	0.106456	179.632		Camta1	0.579908	3702.01		Exoc4	0.22934	107.593		ENSMUSG00000109536	0.301742	264.584		Foxn3	0.473753	673.529		Gabbr2	0.634714	694.362		Med12l	0.229872	153.956		Pitpnc1	0.330763	367.875		Osbpl9	0.390906	395.648
Calm1	0.708939	6087.07		Cbfa2t2	0.0998382	59.6245		Faf1	0.273731	36.5173		Esyt2	0.343192	117.329		Frmd5	0.620441	1823.67		Galnt13	0.0430519	127.994		Mkln1	0.22721	37.5593		Plcb1	0.286038	154.611		Pcdh7	0.532351	169.329
Calm2	0.705834	6877.74		Ccser1	0.269479	888.883		Fam13b	0.0325967	12.9577		Ewsr1	0.366459	41.7671		Gnao1	0.487578	1256.98		Galntl6	0.52262	353.262		Mprip	0.412813	227.708		Ppp2r2b	0.252521	483.388		Plxna4	0.361318	485.466
Caly	0.696987	9015.19		Cdh18	0.152184	334.09		Fbxo11	0.0858062	16.808		Fam193a	0.196371	250.82		Hecw2	0.721968	2222.42		Gigyf2	0.128672	51.7239		Ncoa1	0.313895	81.1066		Prkca	0.234899	138.98		Ppp1r12b	0.181628	216.383
Canx	0.382174	1623.53		Celf4	0.310097	1069.42		Foxp1	0.0699528	6.17292		Fryl	0.42012	323.22		Hipk2	0.384309	372.64		Grm7	0.239494	113.969		Npepps	0.207045	176.596		Psd3	0.380715	406.275		Rapgef6	0.326046	233.193
Cd47	0.320197	1188.94		Clasp1	0.312081	953.774		Fto	0.0480936	60.7259		Fubp1	0.218636	55.9047		Hook3	0.197232	186.681		Hivep2	0.228517	177.554		Nr6a1	0.659881	70.6045		Ptprg	0.423761	707.858		Rmst	0.818748	379.109
Cd81	0.0607005	632.355		Cmip	0.573327	2108.93		Gab2	0.460459	83.7303		Fus	0.192977	103.729		Iqsec1	0.215284	376.491		Iqschfp	0.146815	359.358		Nsmce2	0.412622	329.774		Rora	0.617023	2414.72		Ryr2	0.562758	581.054
Cdc42	0.505868	2806.91		Cntnap2	0.175691	370.405		Gatad2b	0.395599	78.4689		Gm37013	0.213675	249.846		Itch	0.238826	118.933		Kcnma1	0.440083	753.731		Nt5c2	0.229177	68.0138		Sema6d	0.473962	153.015		Scn2a	0.169741	131.62
Cdr1os	-0.003877	167.535		Cracd	0.594302	1168.52		Gls	0.275818	47.493		Gpatch8	0.514466	190.479		Itsn2	0.546325	1097.19		Kirrel3	0.518245	344.5		Oxr1	0.700417	337.763		Smarca2	0.27585	235.919		Slc24a3	0.524998	336.797
Cfap77	0.51286	2907.37		Csnk1g1	0.320063	308.943		Gucy1a2	0.27887	30.5541		Grm5	0.235686	64.3586		Kif1b	0.563142	1367.16		Large1	0.224152	123.539		Parp8	0.211935	55.9164		Spag9	0.282753	126.547		Snhg11	0.657877	364.081
Chchd2	0.701103	4541.54		Csrnp3	0.333765	921.931		Helz	0.256838	54.2351		Hdac9	0.491621	349.902		Kif21a	0.495602	1441.61		Lrrtm4	0.593002	386.697		Pcca	0.4979	288.257		Srgap1	0.443771	359.797		Stxbp5	0.194829	136.976
Cit	0.051694	67.7551		Ctnnd2	0.344783	1932.44		Herc2	0.347776	72.3347		Hecw1	0.288001	297.91		Kmt2c	0.138179	88.8466		Luc7l2	0.442416	146.239		Peg3	0.631981	384.417		Stox2	0.15446	299.4		Stxbp5l	0.291564	286.797
Ckap5	0.00145238	101.223		Dab1	0.500239	1167.02		Hivep3	0.175105	88.3096		Herc1	0.481274	516.229		Limch1	0.677702	2250.04		Marchf1	0.241458	104.085		Phactr1	0.387076	203.707		Tafa5	0.228688	156.066		Tanc2	0.502469	326.435
Ckb	0.17121	1137.89		Dclk1	0.425084	1645.17		Huwe1	0.0329227	6.54401		Igf1r	0.343069	273.295		Magi2	0.33311	764.698		Mrtfb	0.579547	400.492		Pias2	0.425369	46.7405		Tmcc3	0.292102	575.023		Tra2a	0.16044	184.737
Clcn3	0.281336	1437.14		Dennd5b	0.204969	334.744		Jmjd1c	0.0952403	22.7746		Il1rapl1	0.241981	91.8328		Map4k4	0.266698	479.88		Myo5a	0.615781	400.948		Pitpna	0.541136	320.613		Xpr1	0.195903	59.9243		Ttc3	0.21001	151.42
Cox7c	0.601399	3511.67		Dlg2	0.389644	1763.98		Kdm2a	0.11559	35.582		Kalrn	0.494279	388.692		Map7	0.880042	4625.3		Nav2	0.440707	634.248		Ppm1e	0.458819	162.936		Zbtb20	0.0692873	80.0167		Ube2e2	0.372325	160.685
Cox8a	0.680114	4738.81		Dmd	0.176881	197.484		Kif5c	0.246302	62.6916		Kcnip4	0.272525	74.582		Mapt	0.736758	2357.18		Ncoa2	0.278833	487.521		Prkcb	0.49048	122.987		Zeb1	0.32259	376.164		Unc79	0.37496	459.915
Cspg5	0.391036	2291.96		Dner	0.310897	335.759		Klhl7	0.372206	105.64		Lrch1	0.449216	300.944		Mast4	0.564217	2160.64		Nmnat2	0.407945	362.101		R3hdm2	0.594443	233.783		Zfp462	0.426559	418.967		Usp15	0.33636	198.198
Cst3	0.0612969	547.587		Dnm3	0.272959	297.331		Kmt2e	0.00822799	1.08619		Luc7l3	0.36211	353.562		Mat2a	0.303225	291.828		Nrd1	0.190481	98.6111		Ralgapa1	0.301409	275.659		Zhx3	0.418958	408.148		Zmym4	0.113254	71.1912
Cstf3	0.0617353	69.8376		Dnmt3a	0.391061	2894.3		Ldlrad4	0.371618	154.026		Ncald	0.591599	456.715		Mbnl2	0.522669	1102.08		Nrg1	0.685257	229		Rnf130	0.478889	200.246
Ddx24	0.554671	3151.33		Dock7	0.237154	486.274		Magi1	0.229042	85.409		Nedd4l	0.351771	444.47		Myo6	0.331907	295.669		Pacsin1	0.538432	404.921		Rock1	0.527291	281.068
Dgkb	0.167677	360.156		Dpp6	0.508021	3588.18		Map1b	0.341673	68.5194		Nrg3	0.204973	100.132		Nbas	0.438574	1096.53		Pde4dip	0.586517	416.109		Scn1a	0.476523	138.744
Dhx30	0.13064	443.938		Dscam	0.5821	3467.54		Mdm4	0.337963	139.807		Nsf	0.634586	330.647		Ncam1	0.638993	2020.53		Pias1	0.508327	262.373		Sh3gl2	0.435066	96.7643
Dpysl2	0.38101	1233.7		Dst	0.377419	2066.59		Mtmr3	0.122493	82.933		Otud7a	0.225884	157.288		Neo1	0.366933	282.734		Pkp4	0.346078	311.527		Slc25a12	0.544006	149.81
Eef1a1	0.634379	4665.49		Dync1i1	0.326587	650.391		Nav3	0.266972	223.602		Pcdh15	0.241605	30.5791		Nfasc	0.58896	1954.45		Ppp3ca	0.502866	581.039		Slc35f1	0.202827	75.7959
Eif1	0.557366	3457.56		Dync2h1	0.49279	1255.13		Nedd4	0.0274138	18.1216		Pde10a	0.602669	567.618		Pak1	0.213151	98.2851		Prkce	0.426553	789.274		Specc1	0.451992	281.771
ENSMUSG00000092329	0.326788	1315.93		E130307A14Rik	0.284986	1287.46		Nr3c2	0.0214915	4.46799		Pde4d	0.2805	460.419		Pak5	0.346373	165.335		Ptbp2	0.108366	29.1119		Srgap2	0.447461	322.287
ENSMUSG00000093752	0.162912	378.521		Eml5	0.373583	705.801		Oxct1	0.256998	23.6651		Plcb4	0.636624	490.891		Pakap	0.652545	3042.66		Ralgps1	0.393468	707.171		Ssbp2	0.332748	298.237
ENSMUSG00000098078	0.0331312	152.696		Eml6	0.540703	999.323		Pan3	0.231282	23.7443		Plekha5	0.169283	244.215		Pard3	0.28102	182.936		Rapgef2	0.49897	228.367		Stau2	0.440139	394.185
ENSMUSG00000116358	0.360745	2228.39		Enox1	0.381516	693.445		Phip	0.0921931	39.9351		Ppp2r5c	0.265893	158.649		Pcdh9	0.320638	428.386		Rapgef4	0.74664	360.757		Strn3	0.324803	79.1824
ENSMUSG00000117694	0.128445	325.8		ENSMUSG00000097451	0.656382	2938.92		Pi4ka	0.256493	135.55		Psme4	0.318278	156.806		Pde4b	0.502785	1441.5		Rbfox2	0.401031	706.223		Taok1	0.416728	56.9925
Ep300	0.0738631	155.052		ENSMUSG00000110230	0.39941	1807.38		Ppp1r12a	0.168484	42.3271		Ptpn4	0.629156	153.139		Phlpp1	0.70378	2215.89		Rfx3	0.497724	268.867		Tia1	0.254076	145.765
Epha5	0.174777	109.979		Erc1	0.261784	531.545		Ppp2r5e	0.232162	59.4825		Rb1cc1	0.11173	69.9994		Plcl1	0.892205	4306.39		Rgs7	0.42847	458.093		Tnik	0.358374	432.515
Epo	0.316591	1429.11		Erc2	0.589126	2711.23		Rab10	0.258652	18.056		Robo1	0.560344	246.068		Plxdc2	0.174381	73.8406		Sbno1	0.305817	176.751		Tnrc6a	0.328864	192.399
Fau	0.512957	2142.7		Fam155a	0.741873	3861.45		Ralyl	0.0328141	7.81276		Sbf2	0.26357	171.616		Ppp2r3a	0.347667	484.866		Scaf8	0.304475	168.851		Tom1l2	0.380166	225.6
Fth1	0.100971	613.643		Fam168a	0.310449	1368.01		Rbfox1	0.0987265	93.3173		Scn8a	0.52562	421.073		Prickle2	0.456723	662.312		Slc8a1	0.249568	420.639		Ttc19	0.739362	62.2436
Gabbr1	0.491859	2278.26		Fbxl17	0.357991	1287.48		Rbm25	0.442508	43.3342		Setbp1	0.247762	319.232		Ptprd	0.395954	706.041		Sobp	0.426449	555.762		Ube2b	0.433216	257.59
Gap43	0.5063	3688.36		Fgf12	0.521749	2216.81		Rbm5	0.286487	82.3898		Slc4a10	0.262303	146.349		Scd2	0.301207	199.457		Sorbs1	0.597961	437.145		Ube3c	0.556737	413.599
Gapdh	0.181168	771.462		Fgf14	0.511621	1465.33		Rbms3	0.0967872	37.5933		Smg1	0.35699	386.516		Sik3	0.500366	1305.27		Sorbs2	0.463406	448.402		Unc80	0.432072	323.918
Gm3448	0.0962904	294.696		Fndc3a	0.214606	471.77		Rit2	0.321401	19.3705		Spire1	0.301445	77.8675		Slc24a2	0.838074	3912.1		Sybu	0.489855	134.984		Usp32	0.483682	132.009
Gnas	0.470276	3044.34		Frmd4a	0.581994	5610.94		Rock2	0.0508709	7.20174		Spock3	0.488893	514.696		Sorcs1	0.257111	390.726		Tcf4	0.260148	34.6157		Vwa8	0.427531	286.366
Gnb1	0.270082	915.291		Fyn	0.287039	885.009		Rsf1	0.0773091	57.6519		Srpk2	0.751862	281.583		Ssh2	0.3309	716.787		Thoc2	0.274553	124.334		Zfyve9	0.463312	98.0144
Golm2	0.0357206	36.8144		Gabrb1	0.253031	571.492		Scaper	0.186092	51.2719		Syt1	0.188406	42.7376		Tbc1d5	0.595144	789.482		Tjp1	0.576019	432.324
Gphn	0.0580348	135.213		Gabrb3	0.54821	2586.08		Sfpq	0.0615095	62.4853		Tenm2	0.303994	140.412		Tmcc1	0.288321	240.835		Tmeff2	0.516437	88.6699
Gpm6a	0.102052	168.187		Gbf1	0.116099	142.665		Sgms1	0.176452	188.381		Trim9	0.579332	396.119		Tmem117	0.194751	162.203		Tnrc6c	0.561248	416.639
Gpm6b	0.0303074	118.297		Gm21992	0.443855	1482.65		Sltm	0.233895	59.9985		Tspan5	0.706005	504.46		Tmod2	0.645416	1726.8		Trpm3	0.185821	112.315
Grina	0.553221	4358.49		Gmds	0.0978275	55.0267		Snx29	0.367228	171.597		Ttc14	0.279879	61.1724		Tmtc2	0.342206	140.948		Ttc28	0.25263	311.85
H3f3b	0.624451	4537.69		Gnaq	0.271202	649.456		Spop	0.0560588	31.6616		Ulk2	0.272047	210.98		Tulp4	0.403765	415.323		Unc5c	0.386354	132.722
Hmg20a	0.123058	363.971		Gpr158	0.510533	914.623		Sptan1	0.376457	148.209		Vps13a	0.109973	19.4559		Vmp1	0.302399	301.122
Hmgb1	0.32522	1143.16		Gria1	0.524547	1599.94		Sptbn1	0.344247	216.9		Vti1a	0.346327	263.608		Wnk1	0.22122	127.65
Hnrnpdl	0.0904872	333.276		Gria2	0.321521	1494.26		Srek1	0.260769	101.234		Ylpm1	0.190703	350.093		Zdhhc20	0.49976	628.631
Hnrnpr	0.0732744	60.9075		Gria4	0.216644	633.696		Srrm1	0.327479	21.0095		Zfp148	0.189274	183.957		Zfp532	0.372048	911.312
Hsp90aa1	0.715981	6061.86		Grid1	0.417451	2818.35		Tcaf1	0.22691	27.0766
Hsp90ab1	0.708434	6087.41		Grid2	0.183813	639.09		Tcf20	0.369209	33.4093
Hspa8	0.754217	6548.75		Grin1	0.223006	141.482		Tenm4	0.221084	153.645
Impact	0.669885	6228.73		Grip1	0.311095	2006.19		Thoc2l	0.250364	22.8321
Itfg1	0.0803661	103.709		Hectd4	0.320715	1493.57		Tmem135	0.086741	40.411
Itm2b	0.488327	3394.15		Htt	0.211276	712.182		Trip12	0.179926	79.7313
Itm2c	0.491439	3448.34		Ipw	0.491944	2246.34		Ube2h	0.419323	39.7208
Jarid2	0.0144052	26.9954		Jakmip2	0.166966	84.9354		Ubn2	0.15529	156.866
Kif5b	0.0792275	89.173		Kat6b	0.319622	740.581		Vezt	0.237202	68.983
Kifap3	0.281092	1426.38		Kcnb2	0.148594	244.321		Wac	0.449373	109.839
Ktn1	0.0299802	109.807		Kcnn2	0.175189	385.655		Xrn1	0.18317	125.75
Kxd1	0.353446	920.037		Kcnq1ot1	0.585527	4741.88		Zfp292	0.171036	41.7541
Lcor	0.132274	311.233		Kcnq3	0.483631	1024.09		Zfp445	0.139581	150.775
Leng8	0.170409	313.956		Klhdc10	0.135176	98.9756		Zfp638	0.113955	92.1073
Lhfpl3	-0.0539969	513.219		Ksr2	0.547475	2206.05		Zfp950	0.308794	93.6108
Lrp1b	0.0179851	37.4371		Lncpint	0.592214	3375.79
Luzp2	0.0121418	22.2249		Lrrc4c	0.0983541	268.412
Ly6h	0.622178	7180.79		Lrrc7	0.42802	953.2
Malat1	0.00266256	10.9735		Lsamp	0.20908	343
Map4	0.0799696	47.5962		Macrod2	0.392241	1605.35
Map7d2	0.306325	1459.74		Map2	0.365164	980.884
Mapre2	0.0351252	48.6308		Map2k4	0.416936	459.597
Matr3	0.39936	1429.75		Mapk10	0.545948	3565.95
Mbnl1	0.0258431	30.2624		Mast2	0.214584	735.696
Mdh1	0.692108	6927.1		Mbd5	0.252035	759.614
Mef2a	0.0166492	19.0051		Mbtd1	0.422501	1042.02
Mettl23	0.147945	1059.28		Meg3	0.590071	5313.41
Micu3	0.0784104	100.069		Mical3	0.458843	1387.59
Mir99ahg	0.0168816	66.0747		Mmp16	0.232456	339.977
Mpc1	0.108296	188.628		Mycbp2	0.212066	301.763
Mt3	0.329606	1855.56		Myo9a	0.189898	404.216
Mtdh	0.0419054	96.5154		Nalcn	0.453412	1294.69
Myef2	0.0692152	360.928		Nbea	0.475249	1675.88
N4bp2l2	0.0787977	172.049		Nebl	0.49581	548.887
Nap1l5	0.724061	8224.34		Negr1	0.618246	2111.12
Ncoa7	0.0900351	116.828		Nf1	0.245999	939.486
Ndfip1	0.703467	8557.11		Nktr	0.414911	1830.41
Ndn	0.684465	7989.1		Nlgn1	0.463854	615.581
Ndrg4	0.281804	1292.91		Nrxn1	0.397289	1089.69
Ndufa4	0.670288	4306.18		Nrxn3	0.222455	1297.73
Nptn	0.317773	1751.66		Nsd1	0.0847982	81.6001
Pafah1b1	0.150326	401.288		Nsd3	0.147432	143.105
Paip2	0.11713	184.469		Ntrk2	0.2973	1135.85
Pam	0.0710609	86.8697		Ntrk3	0.469693	1432.99
Paxbp1	0.105976	159.509		Osbpl6	0.215423	284.598
Pcdh17	0.0464154	56.9695		Pak3	0.385693	1150.05
Pcm1	0.0572992	84.5924		Papola	0.32322	1097.81
Pcmtd1	0.0245848	45.8374		Pbx1	0.465548	695.129
Pcsk1n	0.703569	9072.06		Pclo	0.386161	1301.04
Pgrmc1	0.631485	6159.95		Phf14	0.192852	180.192
Pja2	0.214475	694.897		Ppfia2	0.254335	356.132
Pkm	0.656313	4482.29		Ppp1r9a	0.401284	762.373
Pnn	0.110618	316.107		Prkg1	0.592088	930.544
Podxl2	0.606293	6223.71		Prkn	0.400556	1821.9
Ppia	0.573083	4063.83		Prrc2c	0.407683	1183.97
Prpf4b	0.123222	187.029		Ptprn2	0.604625	4843.82
Psap	0.329392	938.528		Ptprs	0.251742	66.5468
Psip1	0.354638	1435.14		Rab3c	0.276913	404.733
Ptn	0.0357833	316.65		Rabep1	0.274116	264.215
Ptprz1	0.0395925	126.758		Rabgap1l	0.201885	224.306
Pum1	0.0743135	198.256		Ralgapa2	0.326798	1204.14
Pura	0.46525	2832.56		Rasgrf1	0.368292	2041.83
Qk	0.0194387	167.411		Rbm6	0.149768	328.665
R3hdm1	0.0314116	59.9282		Rere	0.584692	2368.82
Rab2a	0.325148	1415.64		Rev3l	0.172079	344.38
Rabac1	0.702705	5921.54		Rims1	0.317089	1290.33
Rasal2	0.0394142	45.9315		Rims2	0.223531	414.612
Rbm26	0.0879421	138.064		Samd12	0.236979	918.269
Rbm39	0.0782526	201.424		Scai	0.418264	925.027
Relch	0.0233051	25.9719		Sclt1	0.11744	237.597
Resp18	0.694945	9309.89		Scmh1	0.175626	208.186
Rn18s-rs5	0.580359	1403.3		Senp7	0.275214	785.43
Rpl11	0.613232	2908.06		Setd5	0.0940404	48.3963
Rpl13	0.479376	2152.37		Sgcz	0.0621065	59.771
Rpl19	0.690727	4126.7		Sgip1	0.269416	852.205
Rpl41	0.578716	4115.15		Smg6	0.0886529	67.9186
Rpl9	0.539362	2183.75		Smyd3	0.523316	3068.05
Rplp1	0.656202	3730.14		Snap91	0.357754	1264.57
Rps8	0.627222	2780.66		Sntg1	0.246621	626.72
Rsrc1	0.0181272	17.4908		Spock1	0.325486	339.639
Rtn1	0.651022	9808.14		Srgap3	0.505824	1479.73
Rtn3	0.157689	228.339		Syn3	0.430488	1554.2
Rtn4	0.126437	349.159		Syne1	0.53753	2478.4
Rufy3	0.204903	602.609		Taf15	0.116803	122.432
Scg5	0.65898	6814.64		Tenm3	0.187125	679.399
Sec62	0.629195	4682.19		Tmem178b	0.565729	3419.36
Selenok	0.540395	3464.9		Tnrc6b	0.334919	481.014
Septin7	0.0218504	58.9144		Trappc9	0.337938	816.204
Serinc1	0.559426	3163.78		Trerf1	0.433508	1294.74
Sf3b1	0.0399853	25.5116		Trim2	0.263489	635.181
Slc22a17	0.625109	6208.48		Trio	0.500191	1211.09
Slc25a36	0.20088	1147.81		Ubr3	0.462568	1117.06
Slc25a4	0.707249	5161.58		Ubr5	0.370817	1276.26
Snrpn	0.612763	5926.12		Upp2	0.419263	2224.55
Soga3	0.127048	112.974		Usp29	0.326394	1529.88
Son	0.0552493	239.974		Usp34	0.257395	594.247
Srsf2	0.0577237	183.284		Vps13b	0.368738	922.224
Srsf7	0.0695705	48.3404		Wdfy3	0.489833	1468.5
Stag1	0.0355408	53.3994		Wdr33	0.167117	436.574
Stmn1	0.476064	3119.37		Wdr7	0.35058	822.652
Stmn2	0.672843	7068.7		Wsb1	0.215695	384.716
Stmn3	0.709958	8344.13		Wwox	0.224911	566.246
Strbp	0.130582	425.034		Xkr4	0.262589	833.409
Stx16	0.0892957	50.1123		Xkr6	0.444718	2756.04
Sumo1	0.244591	1192.58		Zfand3	0.46152	772.024
Syn2	0.0885656	103.547		Zfp609	0.359327	751.462
Syt11	0.340962	900.225		Zfp704	0.274537	1218.64
Tcf12	0.003271	2.52815		Zmynd11	0.306818	518.07
Tecr	0.683583	8834.75		Zmynd8	0.327894	1777.81
Tenm1	0.00169534	0.918783
Thra	0.294202	749.066
Tial1	0.0544263	36.4802
Tmem59	0.549701	3289.66
Tmsb10	0.726495	5519.75
Tmsb4x	0.277068	1119.15
Tmx4	0.570895	5274.63
Top1	0.0703718	234.961
Trim44	0.0897545	90.5889
Trps1	0.00992346	55.3844
Tsc22d1	0.0941903	472.117
Tsix	0.0503937	235.88
Tspan3	0.551317	4153.8
Tspan7	0.260421	1410.2
Tuba1a	0.303035	1521.96
Tusc3	0.378176	1407.03
U2surp	0.0940856	158.08
Ubb	0.710497	5769.94
Ube3a	0.309015	2105.82
Ubxn4	-0.00138596	102.315
Uchl1	0.683519	7883.48
Vsnl1	0.218158	481.379
Xist	0.03945	132.605
Ywhae	0.444988	2269.21
Zcchc18	0.598662	5408.57
Zcchc7	0.0292855	130.353
Zfp280d	0.0773021	291.574
Zfr	0.0368944	98.561
Zranb2	0.158214	286.436
Zwint	0.675817	5717.38

## Sheet: 7 dpi - gene programs
Gene program 1				Gene program 2				Gene program 3				Gene program 4				Gene program 5				Gene program 6				Gene program 7				Gene program 8				Gene program 9
genes	sim_scores	loading_scores		genes	sim_scores	loading_scores		genes	sim_scores	loading_scores		genes	sim_scores	loading_scores		genes	sim_scores	loading_scores		genes	sim_scores	loading_scores		genes	sim_scores	loading_scores		genes	sim_scores	loading_scores		genes	sim_scores	loading_scores
6330403K07Rik	0.689083	4338.97		4632427E13Rik	0.0221062	0.528698		1500004A13Rik	0.169663	189.958		2310069G16Rik	0.319828	1183.38		4932438A13Rik	0.230904	114.485		1110051M20Rik	0.137429	103.211		2210408I21Rik	0.326237	186.806		5031439G07Rik	0.695658	1947.97		Acaca	0.803536	3219.72
Actg1	0.709357	4464.02		5031425E22Rik	0.0168968	1.60066		Afdn	0.106973	51.4987		4930402H24Rik	0.404819	1017.97		Arnt2	0.179732	57.2543		6820431F20Rik	0.345227	36.5809		2610005L07Rik	0.392838	95.286		Abi1	0.216375	222.818		Add1	0.138596	111.352
Ahi1	0.465547	1690.07		5330434G04Rik	0.0663044	36.8151		Akap9	0.267121	163.496		A230057D06Rik	0.539565	2576.49		Ash1l	0.167875	86.0791		Aak1	0.290198	102.727		Ahcyl2	0.612375	430.103		Abr	0.529971	1291.83		Agap1	0.731758	2785.11
Aldoa	0.772065	6214.23		9930021J03Rik	0	0		Ankrd12	0.100254	83.4934		A330023F24Rik	0.255301	607.518		AW554918	0.27801	114.734		Abhd18	0.370339	244.49		Akt3	0.062796	203.804		Acsl3	0.420645	970.136		Apbb2	0.599054	1450.64
Araf	0.233835	442.049		Abcc5	0.0608903	23.8864		Apba1	0.445272	82.6572		A330076H08Rik	0.478728	1753.43		Baz2b	0.0815184	49.9575		Adgrl3	0.353757	278.163		Ankhd1	0.165894	65.2965		Adk	0.31374	666.491		Aplp2	0.428134	904.338
Arl6ip1	0.745585	5665.56		Acap2	0.155269	35.4319		Astn1	0.131217	344.569		Adam22	0.351241	1337.63		Bclaf1	0.154352	17.697		Alcam	0.267592	63.3795		Atp9a	0.266652	196.656		Arhgap5	0.223907	92.2031		Arhgap21	0.543531	1065.56
Atp1a3	0.228167	618.544		Actb	0.551204	1894.62		Astn2	0.164706	269.878		Adgrb3	0.388829	1406.58		Bicd1	0.185861	90.5466		Ambra1	0.329486	198.545		Atrx	0.328526	255.778		Arid1b	0.232173	208.86		Arid4b	0.219258	298.27
Atp1b1	0.597298	3000.54		Aff4	0.028314	8.17369		Atp9b	0.170757	134.459		Agbl4	0.513918	855.17		Birc6	0.122661	18.8985		Ank2	0.316683	221.498		Auts2	0.608892	455.482		Cadm1	0.391902	1189.85		Atp8a1	0.68919	2406.69
Atp5b	0.682885	3523.7		Ago3	0.2123	46.448		Atxn1	0.302628	78.4818		Akap6	0.56385	1787.3		Cacna1d	0.376422	57.109		App	0.172993	148.933		Bptf	0.307339	162.107		Camk1d	0.473014	1043.63		Bcas3	0.444247	822.081
Atp5j2	0.746553	6815.59		Ankrd11	0.0446385	28.0154		Bicral	0.326381	290.082		Amph	0.313681	833.91		Cask	0.239052	136.566		Arhgap32	0.253676	109.518		Brd4	0.0289637	19.738		Camk2g	0.731152	2222.46		Bin1	0.230443	173.907
Atp6v0b	0.727803	7284.5		Ankrd28	0.327156	345.883		Btrc	0.222981	193.943		Ank3	0.412188	1429.88		Clasp1	0.0794395	57.205		Arih1	0.365542	180.924		Brinp3	0.134946	262.347		Cdh10	0.180648	54.76		Cdc37l1	0.51911	1358.86
Atp6v0c	0.825177	9650.22		Ano4	0.484361	630.927		Cacnb4	-0.0459801	313.446		Ankrd17	0.36742	975.788		Clk1	0.399763	190.289		Arl15	0.463274	94.6114		Btbd9	0.341784	223.652		Chd2	0.157933	192.484		Cdc42bpa	0.876139	4437.41
Atpif1	0.700364	6037.64		Aopep	0.0554279	24.8978		Cadps	0.316946	433.122		Anks1b	0.307624	673.575		Cnot4	0.351111	94.6199		Ascc3	0.34732	71.8204		Cacna1c	0.504539	570.191		Chd9	0.0834796	63.1338		Ctnna3	0.407897	1061.16
Basp1	0.733991	7372.59		Aplp1	0.665079	1497.36		Camk2d	0.100821	265.56		Apc	0.103549	120.262		Cog5	0.399156	183.431		Braf	0.131266	66.6909		Ccdc85a	0.449889	567.993		Clasp2	0.213918	195.197		Dennd5b	0.421677	920.551
Bex2	0.815625	7667.18		Apoe	0.0357882	68.5247		Cdk12	0.254758	102.096		Asic2	0.492373	1602.82		Cpsf6	0.148866	26.6652		Btbd7	0.415887	47.3296		Csmd1	0.469235	368.027		Cpe	0.537449	756.065		Dgki	0.645281	2617.83
Bsg	0.77194	6692.38		Arfip1.1	0.0393968	59.5391		Cdkal1	0.445244	206.682		Atp2b2	0.15217	183.045		Crebbp	0.272268	69.655		Cacnb2	0.174867	99.595		Ctnna2	0.366859	111.203		Ddx17	0.340628	597.645		Dock9	0.571855	1319.05
Calm1	0.786821	6755.67		Asb3	0.108399	26.9572		Celf2	0.56913	603.335		Brwd1	0.356451	651.312		Csnk1a1	0.279335	132.708		Camk4	0.460332	32.7793		Dapk1	0.663438	168.803		Ddx5	0.185974	153.161		Edil3	0.470044	1075.37
Calm2	0.747758	8308.65		Atf2	-0.0197944	8.35068		Cep350	0.0758926	153.799		C2cd5	0.188483	431.518		Dennd4a	0.201784	90.2111		Cdan1	0.270974	107.935		Diaph2	0.477627	56.8294		Dnajc1	0.286809	105.37		Elmo1	0.903955	5612.78
Caly	0.817891	8799.48		Atp2c1	0.118166	63.5636		Cit	0.114467	63.8553		Camta1	0.472823	1644.3		Dlg1	0.144887	19.8842		Cdk14	0.208403	95.2364		Dis3l2	0.216638	134.419		Dtna	0.671491	2256.24		Exoc6b	0.490954	1559.34
Canx	0.164684	364.706		B3galt1	0.0250536	14.7702		Clstn1	0.0556196	84.7497		Ccdc88a	0.184453	321.26		Dnm3	0.133821	81.0192		Chka	0.456697	255.67		Dlgap1	0.525015	198.77		Enah	0.219261	456.468		Frmd5	0.428631	1032.16
Cd47	0.210629	500.543		Cadm2	0.00223219	0		Cntn5	0.308	542.147		Ccser1	0.568307	1748.9		Dok6	0.18602	43.5827		Cnot2	0.291349	63.4959		Eml5	0.32738	236.316		Farp1	0.637044	2740.08		Fryl	0.322251	873.974
Cdc42	0.46967	2651.16		Cd81	0.218185	582.885		Cpeb3	0.287377	187.545		Cdh18	0.343854	972.043		Dst	0.0976952	19.4812		Cntn1	0.0990807	75.9801		Fbxl17	0.0969488	229.947		Fars2	0.18414	263.661		Gnao1	0.674544	2272.3
Cfap77	0.731942	5673.22		Cdh2	0.46116	758.177		Cpeb4	0.0961326	45.8067		Celf4	0.501716	995.745		Ecpas	0.384835	172.164		Cstf3	0.398807	51.1994		Gabbr2	0.476322	193.819		Fmnl2	0.161262	36.3367		Grm3	0.471388	1237.61
Chchd2	0.755069	7358.26		Ckb	0.329921	730.584		Cplane1	0.354582	342.292		Cmip	0.154497	95.6978		Ehbp1	0.0554851	20.322		Ctnnd2	0.219545	365.554		Gabrb1	0.314519	322.564		Fto	0.1146	80.703		Hecw2	0.758766	3348.24
Clcn3	0.195539	617.441		Cltc	0.000972973	0		Csmd3	0.3939	521.624		Cntnap2	0.348089	1333.91		Ehmt1	0.152237	100.525		Dcaf6	0.225987	101.13		Gm21992	0.138186	276.858		Gphn	0.630074	1258.91		Itsn2	0.431004	890.22
Cox4i1	0.74015	6084.75		Cspg5	0.0029316	0		Csnk1g1	0.256168	142.021		Csrnp3	0.239101	436.764		ENSMUSG00000093752	0.167182	31.613		Ddhd2	0.0887727	24.959		Grip1	0.147804	307.431		Hdac8	0.377612	450.036		Kif5b	0.159409	48.9415
Cox5a	0.692468	6689.59		Cst3	0.0552546	171.744		Dcc	0.508746	430.685		Dab1	0.175096	251.112		ENSMUSG00000098302	0.115466	46.89		Dmxl1	0.32696	135.706		Gtf2i	0.406679	119.472		Hnrnpa2b1	0.245342	510.218		Map7	0.887995	4869.2
Cox6c	0.690103	4993.57		Cttnbp2	0.117857	28.7686		Dclk1	0.400126	725.284		Dennd1a	0.387761	1114.57		Epc1	0.182929	59.1257		Dnajc6	0.408794	69.5432		Hivep3	0.244137	58.1423		Igf1r	0.286499	327.38		Mast4	0.472545	1695.19
Cox7c	0.674753	6372.51		Cux1	0.00293664	0		Dgkb	0.5615	740.976		Dip2c	0.51546	1379.56		Erbb4	0.0105454	36.1193		Dnmt3a	0.314984	123.23		Huwe1	0.35781	86.2904		Kcnn2	0.527002	612.35		Ncam1	0.225603	115.669
Cox8a	0.763016	7948.22		Cyrib	0.00133912	1.14447		Dock4	0.575179	669.456		Dlg2	0.421879	2209.06		Ext1	0.238823	50.5929		Dock3	0.391497	358.327		Iqschfp	0.181639	162.932		Leng8	0.419742	566.255		Ncoa2	0.278717	513.683
Ddx24	0.417846	1567.84		Dhx30	0.000915131	0		Dtnb	0.233059	233.122		Dmd	0.25595	647.151		Faf1	0.123177	37.1664		Dpp10	0.170853	142.638		Kalrn	0.565102	334.854		Limch1	0.187345	136.405		Neo1	0.344154	657.861
Eef1a1	0.681191	4773.44		Dip2b	0.246079	53.8638		Enox1	0.317421	124.459		Dner	0.150796	306.227		Fam172a	0.0756764	10.7574		Eml6	0.312589	68.7986		Kcnip4	0.543593	279.074		Lrch3	0.149393	100.262		Nfasc	0.493496	1407.87
Eif1	0.623231	4101.33		Dpysl2	0.175777	222.513		ENSMUSG00000097451	0.384334	1200.43		Dpp6	0.386536	1513.78		Fam193a	0.235505	42.1987		ENSMUSG00000103125	0.341223	115.99		Kirrel3	0.440803	339.888		Lsamp	0.71911	4373.47		Otud7a	0.532629	1517.98
Elob	0.742912	6540.39		ENSMUSG00000098078	0.163856	345.81		ENSMUSG00000102836	0.194531	113.778		Dscam	0.485891	2060.04		Fchsd2	0.356568	87.929		Ewsr1	0.269868	94.157		Large1	0.296088	225.199		Marchf6	0.0983551	14.4035		Oxr1	0.524063	1600.78
ENSMUSG00000040904	0.767595	6274.51		ENSMUSG00000116358	0.540155	1654.29		ENSMUSG00000109536	0.424371	599.514		Dync1i1	0.482027	1120.55		Foxp1	0.259855	30.2272		Gatad2b	0.157125	37.4786		Nbea	0.295359	530.852		Mat2a	0.356645	756.395		Pak1	0.395616	504.772
ENSMUSG00000092329	0.326728	1117.99		ENSMUSG00000116933	0.0127897	0		Esyt2	0.410792	422.039		Dync1i2	0.287115	231.005		Fry	0.0239825	10.3384		Gm20498	0.193199	167.788		Negr1	0.649427	427.61		Mdga2	0.773429	4430.03		Pakap	0.705207	3139.68
Epo	0.418383	2092.22		ENSMUSG00000117694	0.0213238	3.87948		Exoc4	0.289754	95.44		Dync2h1	0.267371	845.83		Fubp1	0.0843003	20.1904		Gm37013	0.344449	48.1325		Pbx1	0.195944	58.1003		Mir99ahg	0.208726	211.146		Pcdh11x	0.259016	487.179
Etnk1	0.174945	637.521		Fgfr2	0.270446	284.287		Fat3	0.596838	421.374		E130307A14Rik	0.241046	432.541		Fyn	0.0440481	9.61926		Gpm6a	0.312695	299.612		Pcdh7	0.186796	223.56		Msi2	0.78984	3026.3		Pcdh9	0.357552	1349.87
Fau	0.666762	3511.15		Fnbp1	0.597244	977.954		Fmn2	0.186162	235.313		Eif4g3	0.173481	195.275		Gbf1	0.376383	181.485		Gprasp1	0.13096	74.022		Pde4dip	0.558971	219.666		Npepps	0.17461	168.374		Phactr3	0.361552	892.7
Gabarapl2	0.724141	6506.2		Foxn3	0.148418	45.0676		Ftx	0.515394	650.359		Elavl3	0.272922	564.956		Gigyf2	0.233154	88.1716		Herc1	0.224456	235.129		Phactr1	0.410879	187.985		Nrcam	0.38946	258.463		Plcl1	0.890785	5294.25
Gabbr1	0.38014	1071.32		Fth1	0.49863	858.171		Gab2	0.453747	158.141		ENSMUSG00000110230	0.38241	953.705		Glg1	0.118088	32.703		Itfg1	0.279654	56.0287		Phf20l1	0.334713	248.952		Ntrk2	0.667849	2124.24		Ppp2r3a	0.667185	1826.29
Gapdh	0.214151	846.782		Fut8	0.0674461	52.7728		Galnt13	0.0735928	108.132		Epb41l3	0.171237	178.739		Golgb1	0.19466	18.9586		Itsn1	0.171163	171.964		Ppm1e	0.34507	51.8457		Phf21a	0.277181	266.714		Psap	0.496364	1437.64
Gnas	0.522159	3042.84		Fut9	0.00368293	0		Galntl6	0.445982	582.522		Erc2	0.271677	886.038		Gpatch8	0.307957	168.143		Kcnd2	0.272302	157.94		Ppp1r12b	0.149904	219.596		Pias1	0.368377	547.266		Ptgds	0.744889	4071.38
Gnb1	0.195581	1032.62		Gls	0.0466374	9.71868		Gnaq	0.0707894	150.374		Fam155a	0.579133	3425.51		Gsk3b	0.0892226	15.9463		Kcnq3	0.116722	73.5429		Ppp3ca	0.139223	46.278		Plcb1	0.757605	2944.84		Ptpra	0.289023	523.62
Gpx4	0.530301	2177.11		Gm3448	0.00662431	0		Gpc6	0.404096	417.409		Fam168a	0.0743977	52.0693		Herc2	0.197202	36.8737		Kdm2a	0.0724051	20.196		Prkce	0.61619	142.345		Ptprg	0.254873	372.7		Rcan2	0.649124	2073.45
Grina	0.286962	654.143		Golm2	0.0128291	0		Gpr158	0.438804	573.092		Fgf12	0.380768	795.015		Hnrnpl	0.1843	25.3252		Kif21a	0.320753	30.1286		Ptbp2	0.440038	497.723		Rora	0.76499	4651.38		Rsrp1	0.573837	1608.24
H3f3b	0.505256	1970.88		Gpm6b	0.410731	396.621		Grik2	0.312665	914.135		Fgf14	0.528913	2358.48		Kidins220	0.0421441	17.6072		Klc1	0.318735	209.2		Rfx3	0.239289	295.531		Sik3	0.179039	258.136		Scd2	0.309474	217.975
Hint1	0.762056	6538.78		Gucy1a2	0.0153712	0		Grin2b	0.5461	296.47		Frmd4a	0.443247	1467.38		Kif1a	0.0902824	32.2754		Kmt2e	0.272389	91.1336		Rock2	0.112428	107.845		Smarca2	0.225549	125.598		Slc6a1	0.330104	717.185
Hmgb1	0.332997	1444.52		Hivep2	0.00712215	0		Grm7	0.38422	363.784		Gabrb3	0.353704	770.086		Kif1b	0.182004	52.2391		Lhfpl3	0.188802	232.93		Rsf1	0.118139	120.404		Sorbs1	0.565341	1472.34		Slc8a1	0.516016	1707.41
Hsp90aa1	0.769378	5854.82		Hmg20a	0.016944	4.11162		Hdac9	0.613788	713.466		Gmds	0.261981	342.185		Klf12	0.206101	136.442		Luc7l3	0.16019	129.933		Rtn3	0.11062	53.0541		Spire1	0.470014	717.638		Spock1	0.488303	1545.88
Hsp90ab1	0.770647	6610.61		Hnrnpdl	0.0867262	54.4319		Hectd4	0.331717	403.248		Gria1	0.215559	501.696		Kmt2c	0.112302	28.7448		Mast2	0.354591	137.153		Sgcz	0.394646	163.475		Spop	0.162039	161.315		Ssh2	0.615261	1844.69
Hsp90b1	0.304151	660.902		Hnrnph3	0.0869348	14.3058		Hnrnpu	0.431975	566.71		Gria2	0.415697	1960.76		Lncpint	0.192263	130.361		Mbd5	0.253278	107.906		Slc24a3	0.376728	76.3478		Srgap1	0.463908	708.425		St6galnac3	0.905703	5625.08
Hspa8	0.816428	8072.19		Hnrnpr	0.0434329	21.2332		Il1rapl1	0.268125	594.358		Gria4	0.423547	1644.66		Lrrtm3	0.0693144	47.099		Mical3	0.304402	240.876		Smg1	0.311721	95.1677		Srrm1	0.0924779	27.7677		Tbc1d5	0.750327	3172.71
Impact	0.438063	1465.57		Hook3	0.199619	65.3355		Lingo2	0.331102	100.108		Grid1	0.565789	2091.9		Mark3	0.211837	109.189		Mprip	0.366915	151.678		Sptbn1	0.316498	99.2215		Thra	0.438586	455.951		Tmcc3	0.434116	1008.16
Itm2b	0.509476	3260.68		Igsf8	0.0337208	33.6518		Lrba	0.164429	178.606		Grid2	0.413378	1558.76		Mbtd1	0.100916	22.2438		Mycbp2	0.294548	61.4188		Tafa5	0.339474	141.333		Tnik	0.380596	1070.46		Tmem117	0.514831	1101.81
Kifap3	0.150158	265.827		Itm2c	0.019294	9.48026		Lrrc4c	0.23952	637.178		Htt	0.326703	550.799		Mdm4	0.232565	113.598		Myo5a	0.308604	128.304		Tcf4	0.0324176	55.0034		Trim9	0.663111	1134.56		Tmod2	0.77172	2670.27
Kxd1	0.401633	1389.45		Jarid2	0.16308	131.909		Lrrc7	0.50112	460.483		Ipw	0.52314	3340.72		Mkln1	0.221596	90.3413		N4bp2l2	0.363126	83.2338		Tenm2	0.482803	322.142		Trpm3	0.772386	3984		Vmp1	0.542626	1231.96
Lcor	0.193823	575.459		Jmjd1c	0.112921	20.0905		Lrrtm4	0.251901	306.48		Kcnma1	0.317592	878.264		Mllt10	0.182606	65.4669		Ncald	0.425681	44.0351		Tnrc6c	0.554184	433.99		Trpm7	0.210888	188.576		Zdhhc20	0.617255	1604.78
Ly6h	0.775166	7874.66		Krit1	0.0373758	7.57464		Macrod2	0.278465	895.727		Kcnq1ot1	0.441755	1516.82		Nbas	0.169871	52.9477		Nckap1	0.278114	51.5187		Ttc28	0.130225	195.63		Xpr1	0.373124	632.896		Zfp532	0.193891	84.3211
Map7d2	0.155331	820.18		Ktn1	0.219668	169.808		Magi1	0.336402	191.738		Map2	0.326897	748.411		Nedd4	0.250347	59.1218		Nebl	0.373948	117.694		Ube2b	0.399167	51.6365		Zhx3	0.640851	1324.96		Zfp638	0.298019	384.944
Matr3	0.227468	274.749		Lamp1	0.458392	867.482		Meg3	0.47225	2120.89		Mapk10	0.478658	1801.24		Nipbl	0.207127	41.3904		Peg3	0.479554	302.119		Unc5c	0.146123	199.116
Mdh1	0.731533	7149.31		Lrp1b	0.322092	217.192		Mrtfb	0.239567	82.4827		Med12l	0.25531	661.061		Nrxn2	0.0238491	4.82207		Plekha5	0.308822	179.893		Unc80	0.108881	182.342
Micu3	0.109791	70.3661		Luc7l2	0.00873436	0		Myt1l	0.579467	242.289		Mmp16	0.229188	479.546		Nsmce2	0.147027	44.446		Prickle2	0.192777	130.694		Vps13b	0.230748	114.88
Mt3	0.498248	3078.38		Luzp2	0.00371828	0		Naaladl2	0.336646	326.804		Mtmr3	0.284923	510.096		Nt5c2	0.155005	97.7451		Psme4	0.275164	142.339		Zbtb20	0.458277	218.409
Mtch1	0.613297	2329.83		Magi2	0.281832	128.069		Nav1	0.316771	166.474		Myo9a	0.293314	1117.99		Ntm	0.0293907	10.7392		Ptprz1	0.116385	128.771		Zfp609	0.354318	166.337
Nap1l5	0.808233	7163.14		Malat1	0.592621	1641.78		Nav2	0.460562	611.877		Nalcn	0.485342	1578.55		Pan3	0.25836	64.8978		Ralgapa2	0.14219	157.781		Zfr	0.0299215	60.1747
Ncoa7	0.0729935	65.6303		Map4	0.353048	324.554		Nlgn1	0.344478	775.532		Nav3	0.41818	1219.58		Pcca	0.106033	30.0849		Ralgps1	0.239398	86.1392
Ndfip1	0.780844	9251.96		Mapre2	0.233026	112.599		Nol4	0.313743	137.605		Ncoa1	0.218292	258.823		Phf14	0.217905	53.5812		Rapgef2	0.375812	90.9989
Ndn	0.779048	4062.94		Mapt	0.263061	165.262		Ogt	0.532919	571.838		Nf1	0.239912	393.068		Pias2	0.179924	50.2133		Rbfox2	0.531719	173.927
Ndrg4	0.254035	515.424		Marchf1	0.18935	144.787		Opcml	0.42805	382.723		Nktr	0.265885	749.772		Picalm	0.0486974	15.075		Rbm25	0.209023	60.8472
Ndufa13	0.721019	5044.01		Mettl23	0.314277	445.844		Oxct1	0.346682	164.464		Nmnat2	0.263508	427.312		Plcb4	0.237395	101.545		Rgs7	0.115489	84.5558
Ndufa4	0.715795	5802.51		Mgat4c	0.00281728	0		Papola	0.236487	114.48		Nova1	0.333141	1084.95		Prkca	0.209125	76.0458		Rock1	0.114193	90.8184
Ndufc2	0.757266	6709.86		Mir100hg	0.198137	185.444		Parp8	0.397614	74.7341		Nrg3	0.309989	816.107		Ptpn4	0.179678	32.7542		Samd12	0.384485	109.083
Nptn	0.116958	521.134		Mpc1	0.229604	288.969		Pcdh15	0.240005	186.161		Nrxn1	0.475091	1886.94		Rabep1	0.145597	13.0343		Scaf8	0.314704	132.769
Oaz1	0.638326	3671.42		Mtdh	0.0841057	90.3177		Pcdh17	0.150435	176.174		Nrxn3	0.50837	2188.67		Rbm5	0.262309	120.31		Scmh1	0.355352	63.9998
Pcsk1n	0.481153	1227.76		Myef2	0.0164004	0		Pclo	0.420824	395.856		Ntrk3	0.336174	1269.59		Rbms3	0.217463	122.385		Setbp1	0.184428	65.7144
Pebp1	0.7206	5463.02		Ncam2	0.362401	337.46		Phip	0.412977	383.313		Osbpl9	0.115975	159.256		Rit2	0.0194126	7.67479		Sgip1	0.418243	248.415
Pgrmc1	0.435987	1532.38		Nedd4l	0.00119252	0		Ppfia2	0.256106	353.336		Pak3	0.297409	841.815		Sbf2	0.0203144	5.88588		Snx29	0.236204	120.97
Pkm	0.583113	2344.79		Nkain2	0.494049	602.432		Ppp1r9a	0.389925	165.184		Pam	0.402232	604.839		Snap91	0.163549	144.822		Sptan1	0.567642	219.664
Podxl2	0.505782	1626.56		Nlk	0.0854167	26.4029		Ppp2r5c	0.109251	209.95		Pcm1	0.202229	153.735		Sorbs2	0.00394506	0		Srgap2	0.165511	121.446
Ppia	0.772704	8663.34		Npas3	0.296177	290.203		Prkacb	0.275684	291.713		Pde4d	0.345007	1335.98		Specc1	0.0614252	142.518		Stag1	0.142003	57.9826
Prpf4b	0.193449	695.639		Nr3c2	0.00775107	0		Prkg1	0.473321	386.384		Pi4ka	0.284083	869.482		Srsf5	0.323372	162.544		Syne1	0.172197	147.594
Psip1	0.467137	1839.43		Nrd1	0.0981127	40.2922		Rabgap1l	0.354523	287.247		Ppp2r2b	0.348219	409.443		Ssbp2	0.238205	91.6555		Tenm3	0.308077	180.937
Rab2a	0.31515	1283.04		Pafah1b1	0.290038	253.89		Rapgef6	0.178254	281.992		Prkn	0.52956	2133.36		Trim2	0.12355	64.3427		Thoc2	0.358846	113.352
Rabac1	0.688522	3531.2		Paip2	0.134524	117.68		Rbfox1	0.311527	736.862		Prrc2c	0.174387	102.93		Trio	0.214089	69.1172		Tnrc6b	0.305796	91.5491
Resp18	0.79239	8134.88		Pak5	0.603113	916.666		Rbm6	0.221104	319.103		Ptprn2	0.634158	2554.6		Trip12	0.302846	172.39		Tspan5	0.219321	55.4417
Rpl11	0.679681	3234.21		Pcmtd1	0.0571617	21.3751		Rmst	0.5214	940.646		Rabgap1	0.178972	247.093		Ube2h	0.303772	45.8367		Ube3c	0.361646	264.562
Rpl13	0.588064	3078.25		Pde4b	0.199279	70.1272		Rnf130	0.346127	319.176		Ralgapa1	0.327797	835.624		Ulk2	0.302369	101.593		Unc79	0.265057	178.089
Rpl19	0.763824	4957.46		Pitpnc1	0.00198452	0		Scaper	0.121746	121.388		Ralyl	0.225292	431.584		Vezt	0.216072	41.9049		Usp9x	0.302155	31.7299
Rpl21	0.671516	3425.1		Plxdc2	0.332588	534.024		Scn2a	0.172562	199.116		Relch	0.210892	177.181		Vti1a	0.324503	100.292		Wdfy3	0.293453	129.183
Rpl22l1	0.74924	5879.36		Pnn	0.0701153	27.581		Setd5	0.241788	287.746		Rere	0.410625	1157.31		Vwa8	0.148054	65.7548		Ylpm1	0.241036	160.909
Rpl23	0.697491	3615.68		Ppib	0.0980403	127.589		Sfpq	0.201493	251.503		Rev3l	0.250045	151.467		Wac	0.467698	165.699
Rpl24	0.706553	4521.87		Prickle1	0.0826344	43.9336		Slc25a12	0.108702	147.997		Rims1	0.395022	1815.59		Wdr33	0.208862	91.3875
Rpl27a	0.617958	3000.71		Prn	0.0213874	17.7935		Sltm	0.225241	141.911		Rims2	0.411226	1524.58		Zeb1	0.014594	2.32822
Rpl3	0.668061	3471.7		Pten	0.0164774	16.8343		Smg6	0.155359	304.552		Rnpc3	0.244027	502.06		Zfp148	0.310824	88.8045
Rpl37	0.53039	2159.38		Ptk2	0.268188	122.943		Snhg11	0.579136	896.024		Robo1	0.241969	294.796		Zfp292	0.233203	43.8082
Rpl37a	0.64127	3145.49		Ptn	0.257841	662.627		Snhg20	0.557044	594.75		Sclt1	0.188199	320.178		Zfp462	0.251408	104.846
Rpl38	0.666478	3485.67		Ptprd	0.624549	1096.12		Strn3	0.256248	149.882		Senp7	0.311618	210.892
Rpl41	0.712527	4988.04		Pum1	0.102945	25.8336		Syt1	0.439507	306.772		Slc4a10	0.2446	764.574
Rpl6	0.686376	3555.21		Pura	0.0790258	18.2357		Tanc2	0.309262	413.343		Smyd3	0.448594	2167.98
Rpl8	0.720867	3726.88		Qk	0.687382	1452.94		Tenm4	0.374838	218.521		Sntg1	0.189241	353.724
Rpl9	0.517864	2045.9		R3hdm1	0.00220029	1.41447		Tia1	0.248382	143.107		Sobp	0.222898	329.192
Rplp1	0.710527	3912.22		R3hdm2	0.00926418	0		Tnrc6a	0.119387	284.902		Srgap3	0.199324	207.77
Rps10	0.695192	3723.59		Rasal2	0.00999865	2.89434		Trim44	0.171193	34.5154		Stau2	0.149742	85.3054
Rps2	0.659071	3851.83		Reep5	0.443094	715.024		Tut4	0.162551	37.6361		Stxbp5l	0.40736	1364.24
Rps21	0.584058	3209.35		Rfx7	0.016848	0		Ubr5	0.310856	306.669		Tial1	0.266299	124.977
Rps24	0.564969	2627.46		Rn18s-rs5	0.274328	933.611		Usp15	0.118889	74.2007		Tmem178b	0.442323	955.645
Rps27a	0.582657	2449.6		Rtn4	0.688175	1203.07		Usp32	0.113554	70.8979		Ubn2	0.238292	233.894
Rps3a1	0.566087	2544.3		Rufy3	0.0405747	22.6139		Usp34	0.276944	311.159		Ubr3	0.283129	630.393
Rps8	0.654442	3142.87		Sema6d	0.106962	38.0514		Vps13a	0.440596	331.861		Upp2	0.277226	75.0457
Rpsa	0.589527	2251.25		Septin7	0.438177	496.676		Wwox	0.17986	135.987		Usp29	0.427582	1589.52
Rtn1	0.796601	8826.61		Slc24a2	0.359882	200.897		Xkr6	0.304836	181.056		Wdr7	0.267769	349.286
Scg5	0.601748	3071.53		Slc25a36	0.0441823	41.9193		Zcchc7	0.290224	299.914		Wsb1	0.274838	631.931
Sec62	0.573716	2876.97		Snap25	0.00210506	0		Zfp280d	0.0667259	77.3286		Xkr4	0.528817	1953.23
Selenok	0.571678	3807.76		Soga3	0.018764	0		Zfyve9	0.186892	201.424		Xrn1	0.281423	507.341
Selenow	0.457808	1764.23		Son	0.0146319	2.34316		Zmynd8	0.259198	122.971
Slc22a17	0.4891	1806.91		Spock3	0.630715	1111.31
Slc25a3	0.639619	4441.58		Srpk2	0.00359223	0
Slc25a4	0.739519	5750.59		Srrm2	0.0322345	32.2484
Snrpn	0.491361	3444.14		Stmn1	0.442078	1448.96
Srsf7	0.146756	208.992		Stox2	0.00212742	0
Stmn2	0.749	6580.33		Strbp	0.00249974	0
Stmn3	0.789012	7952.24		Sybu	-0.00025054	0
Stx16	0.115036	256.444		Syn2	0	0
Sumo1	0.289699	1028.39		Tcf12	0.20676	294.679
Tcf20	0.0877623	86.4875		Tmcc1	0.342873	279.591
Tecr	0.764408	8139.9		Tmeff2	0.582857	1053.91
Tmem59	0.427848	2120.93		Tmsb4x	0.531098	1121.1
Tmsb10	0.75111	8773.08		Tmtc2	0.103403	86.9879
Tmx4	0.362491	856.354		Top1	0.0213733	7.11543
Tpt1	0.69404	4261.8		Trps1	0.0044378	0
Tspan3	0.367244	1564.44		Tsc22d1	0.0545088	45.4657
Ttc3	0.248535	558.68		Tsix	0.15636	358.987
Tubb2a	0.797435	6822.16		Tspan7	0.00143619	0
Tusc3	0.455325	1276.9		Ttc19	0.0763888	14.3841
Uba52	0.446094	1470.17		Tuba1a	0.468978	1158.42
Ubb	0.776832	10122		Tulp4	0.435258	476.493
Ubc	0.550901	2372.32		Ube2e2	0.169038	105.235
Ube3a	0.471446	5783.56		Wnk1	0.513432	591.659
Uchl1	0.721014	5950.33		Xist	0.319756	323.096
Vsnl1	0.240367	637.582		Ywhaq	0.37941	614.642
Ywhae	0.388359	1627.61		Zfp608	0.0400571	44.3917
Zcchc18	0.733826	5286.44		Zfp950	0.0836587	46.6605
Zscan26	0.135282	243.135
Zwint	0.674218	3475.17

## Sheet: 23 dpi - gene prgrams
Gene Program 1				Gene Program 2				Gene Program 3				Gene Program 4				Gene Program 5				Gene Program 6				Gene Program 7				Gene Program 8
genes	sim_scores	loading_scores		genes	sim_scores	loading_scores		genes	sim_scores	loading_scores		genes	sim_scores	loading_scores		genes	sim_scores	loading_scores		genes	sim_scores	loading_scores		genes	sim_scores	loading_scores		genes	sim_scores	loading_scores
5330434G04Rik	0.0306777	0		Actg1	0.688583	3092.98		Acsl3	0.0793495	26.8817		2310069G16Rik	0.327973	24.6917		4930402H24Rik	0.416678	342.991		Sox2ot	0.50725	43.7826		2610005L07Rik	0.249016	40.2129		Abi1	0.582111	203.454
6820431F20Rik	0.15984	17.6386		Aldoa	0.740408	4228.09		Actb	0.174433	66.955		4932438A13Rik	0.246998	78.2759		5031425E22Rik	0.433902	61.5385		Qk	0.494545	1.51831		Aak1	0.302711	36.189		Ank2	0.544972	202.445
A330023F24Rik	0.142465	32.0403		Aplp2	0.0813391	33.4581		Acyp2	0.312696	33.6193		9930021J03Rik	0.105016	31.3386		Abr	0.22049	55.4711		Elmo1	0.47295	21.4892		Adgrl3	0.106497	77.0934		Baz2b	0.139936	21.5992
Abhd18	0.110879	11.9481		Araf	0.302495	825.813		Aff4	0.0394456	5.78092		A230057D06Rik	0.219683	53.0186		Adk	0.432338	143.273		Grm3	0.464184	20.7934		Apbb2	0.495071	40.1811		Chd2	0.374691	136.109
Adgrb3	0.0867486	33.3338		Arl6ip1	0.666723	2900.14		Ankrd11	0.122267	3.31848		Abcc5	0.326225	85.3552		Apc	0.32444	200.525		Erbin	0.461008	19.5162		Atp2b2	0.340778	66.6021		Cog5	0.449302	221.264
Agbl4	0.0105704	1.97463		Atp1b1	0.543524	2216.38		Ankrd28	0.0422781	1.31338		Ahi1	0.348534	306.499		Arhgap5	0.0572767	126.148		St6galnac3	0.459788	38.8191		Camk1d	0.478192	82.8444		Ddx5	0.535695	173.053
Ago3	0.308903	50.3412		Atp5b	0.575967	1918.62		Aplp1	0.0746576	4.14275		Akap9	0.206767	132.796		Arhgef12	0.218313	77.0132		Gab2	0.457826	21.1807		Camk2d	0.179726	80.3399		Fmnl2	0.535493	71.9941
Ahcyl2	0.25838	101.49		Atp5h	0.711085	2883.48		Apoe	0.206624	150.196		Ankib1	0.283225	57.633		Arid1b	0.352258	101.704		Tmcc3	0.44079	34.3081		Cpeb3	0.368557	27.0108		Kmt2e	0.375636	87.3993
Akap6	0.0253092	3.03331		Atp5j2	0.685042	3509.64		App	0	0		Anks1b	0.392254	155.975		Arnt2	0.143227	20.5764		Tulp4	0.440016	81.5273		Cpsf6	0.334017	71.3538		Luc7l2	0.429717	127.219
Akap8l	0.114127	55.8523		Atp5pb	0.7096	3123.54		Arhgap21	0.0201895	0		Asic2	0.310457	129.251		Astn1	0.0456894	10.0854		Tmem135	0.438038	6.5132		Crebbp	0.262045	36.6562		Nipbl	0.57992	150.603
Amph	0.415242	105.302		Atp6v0b	0.561786	2212.39		Arid4b	0.0462678	0		Astn2	0.378501	68.8655		B3galt1	0.404024	142.882		Snx29	0.434315	37.6832		Cspp1	0.389803	202.128		Nr3c2	0.554303	151.589
Ank3	0.145951	67.8851		Atp6v0c	0.772584	7582.56		Atp1a3	0.195447	78.9603		Atp6v0a1	0.104669	22.1196		Cacnb2	0.167862	158.076		Acap2	0.430402	0		Cttnbp2	0.240135	21.148		Plcb4	0.55004	112.345
Ankrd12	0.16023	51.523		Atpif1	0.646379	2921.44		Atp8a1	0.0339458	0		Celf2	0.201003	163.561		Ccdc88a	0.130496	136.942		Itch	0.400796	67.2397		Dcaf6	0.410282	38.6241		Rock1	0.455555	266.67
Ankrd17	0.26954	20.0945		Atxn10	0.202725	641.644		Atp9a	0.178653	22.0346		Cep350	0.0925898	97.4564		Cdh10	0.203273	73.6109		Map7	0.398649	45.4597		Dnajc6	0.350664	25.6219		Setd5	0.375206	151.573
Ano4	0.0624636	8.13635		Basp1	0.611983	2751.44		Bcl2l2.1	0.216437	16.6292		Chd6	0.336248	144.13		Chchd3	0.151802	118.21		Daam1	0.393787	40.3004		Dnm3	0.0115848	0.863141		Son	0.323829	211.374
Arl15	0.234161	75.628		Bhlhb9	0.375822	932.852		Bclaf1	0.13263	22.949		Cntn5	0.376275	74.3671		Chd4	0.239559	40.7097		Fcho2	0.378723	11.252		Edil3	0.412508	61.4822		Strn3	0.289065	58.96
Asap1	0.379231	83.1053		Bsg	0.753569	4670.08		Cacnb4	-0.0600214	6.01865		Cntnap2	0.350008	64.6646		Chd9	0.288369	124.508		Csmd3	0.368044	15.507		Ehbp1	0.352747	92.3291		Top1	0.560943	102.904
Asb3	0.332308	110.355		Calm1	0.660041	1624.16		Cask	0.11356	2.5489		Csmd1	0.0730408	50.3599		Clasp1	0.120751	25.1669		Ankhd1	0.359269	33.8205		Elavl3	0.319741	50.8038		Ube2b	0.442692	158.183
Atp2c1	0.379888	105.448		Calm2	0.690878	2892.79		Cbfa2t2	0.0563518	6.87984		Csnk1g1	0.260039	42.3141		Ctnnd2	0.436551	297.8		Ascc3	0.356707	12.9045		Erc2	0.33738	29.4171		Vezt	0.445871	171.202
Atxn1	0.173322	42.4249		Caly	0.75544	6233.79		Cd81	0.138517	58.4296		Dennd5b	0.298418	21.7449		Ddhd1	0.306538	177.345		Kdm6a	0.342592	19.9405		Ewsr1	0.373235	214.919		Zbtb20	0.457916	60.5162
Auts2	0.270413	72.5829		Canx	0.190483	371.261		Cdc37l1	0.0911041	2.62676		Dis3l2	0.278758	55.4735		Dennd1a	0.106779	62.4419		Ank	0.342583	36.7236		Fam172a	0.316476	66.9853		Zfp148	0.431358	78.2586
Brinp3	0.0858799	20.9524		Cd47	0.201001	221.557		Celf1	0.0188069	0		Dlg1	0.303015	20.6192		Desi2	0.0632651	29.8715		Mat2a	0.338452	79.6698		Fryl	0.41863	119.464
Btbd9	0.172115	29.6769		Cdc42	0.323076	488.681		Chn1	0.17056	16.686		Dock4	0.29059	201.072		Dtna	0.416384	312.47		Vti1a	0.338398	0		Fut9	0.499584	40.1186
C2cd5	0.180597	78.348		Cfap77	0.690303	4325.32		Ckb	0.266986	104.024		Eml6	0.326755	103.147		E130307A14Rik	0.164114	62.0941		Dnmt3a	0.337626	20.3571		Gabbr2	0.602394	149.82
Cacna1a	0.145758	54.2718		Chchd2	0.769331	3921.11		Clcn3	0.19979	28.3967		Enah	0.160036	102.544		ENSMUSG00000098078	0.348572	649.085		Pard3	0.332432	20.0986		Gls	0.442285	163.154
Cacna1c	0.113233	75.783		Cltc	0.172054	118.528		Cnot4	0.0813176	1.48524		ENSMUSG00000052291	0.236093	313.788		ENSMUSG00000112437	0.396495	614.465		Pakap	0.330135	9.21704		Gpatch8	0.521905	142.774
Cadm2	0.380524	114.269		Cmss1	0.223208	213.607		Cpe	0.018539	0.977426		ENSMUSG00000102836	0.420172	273.762		ENSMUSG00000116933	0.166282	65.9735		Zmynd11	0.328547	0		Gria4	0.322923	200.86
Cadps	0.361835	238.785		Cox4i1	0.740639	3470.65		Cspg5	0.174879	29.0688		ENSMUSG00000103125	0.383964	327.494		Epc1	0.15425	44.6005		Trpm7	0.328425	0		Grid1	0.228805	52.399
Camta1	0.173485	77.3414		Cox5a	0.694528	4067.33		Cst3	0.187893	148.543		Esyt2	0.360657	78.6696		Erbb4	0.485386	375.312		Brwd1	0.324517	97.7429		Hdac9	0.514641	257.852
Ccdc85a	0.22327	110.207		Cox6c	0.618197	2581.6		Cul1	0.073373	9.12513		Fam168a	0.459076	153.22		Exoc6b	0.301469	170.364		Wwox	0.318704	7.22239		Hectd4	0.296075	50.837
Ccser1	0.283325	98.1699		Cox7a2	0.708159	3149.23		Cyrib	0.0532076	7.99725		Fat3	0.638039	130.899		Farp1	0.269181	154.582		Aopep	0.317558	69.1885		Hivep3	0.511609	113.216
Cdh18	0.335777	34.7247		Cox7b	0.575878	1423.19		Dclk1	0.00442455	0		Fbxl17	0.165369	19.854		Fmn2	0.174952	171.895		Ddx17	0.314221	129.007		Itsn1	0.105172	165.476
Cdk14	0.463362	75.5503		Cox7c	0.673357	2748.56		Dennd4a	0.0679477	6.87878		Frmd5	0.613014	423.154		Fry	0.58722	538.803		Kansl1	0.308955	91.1679		Kcnq3	0.415912	45.9548
Celf4	0.034844	3.11457		Cox8a	0.7401	3896.99		Dgki	0.00275342	0		Ftx	0.294825	82.9369		Fut8	0.249096	251.525		1500004A13Rik	0.307065	6.10568		Kidins220	0.493208	39.0323
Chka	0.197228	43.8296		Ddx24	0.348715	371.169		Dhx30	0.0260193	0.616881		Gkap1	0.301489	33.8707		Gabrb1	0.327083	156.28		Phip	0.306416	56.412		Klf12	0.218068	36.3391
Cntn1	0.265553	90.8822		Dpysl2	0.395573	584.107		Enox1	0.00601315	0		Gpc6	0.400699	225.544		Hdac8	0.442953	358.377		Zfand3	0.305362	30.8096		Lhfpl3	0.160717	56.8174
Cplane1	0.207151	59.2919		Eef1a1	0.68306	2709.87		ENSMUSG00000064339	0.216044	44.3225		Gpr158	0.374762	77.3729		Hipk2	0.486132	113.301		Hnrnpdl	0.304154	49.5668		Lrrc7	0.535064	34.7581
Csmd2	0.339515	37.7702		Eif1	0.614194	1959.78		ENSMUSG00000093752	0.00378643	0		Gria2	0.466912	446.889		Hnrnpa2b1	0.148839	168.979		Gnaq	0.29579	59.1257		Lrrtm3	0.0171727	4.23002
Cstf3	0.322467	61.9425		Elob	0.74097	4542.8		ENSMUSG00000116358	0.327257	167.53		Grin2b	0.358916	227.381		Hook3	0.258344	70.5317		Ube2e2	0.286423	57.3556		Mprip	0.40524	74.6455
Dip2c	0.0255824	3.37819		ENSMUSG00000040904	0.751375	3906.44		ENSMUSG00000117694	0.0970362	14.3801		Grm7	0.418849	52.4511		Huwe1	0.0935513	66.1959		Eif4g3	0.280309	14.5507		Nav3	0.133511	41.848
Dlg2	0.314178	159.489		Epo	0.364527	1275.85		Fbxo11	0.0609096	4.46084		Hecw2	0.170333	79.1556		Igsf8	0.115862	113.161		Smarca2	0.273197	26.9466		Nktr	0.244468	25.8112
Dlgap1	0.303342	151.061		Fau	0.666476	2141.8		Fth1	0.134996	57.9689		Herc2	0.0209899	17.2832		Kcnd2	0.484032	523.32		Scmh1	0.26111	74.2389		Ogt	0.524827	103.496
Dock3	0.228271	131.511		Gabarapl2	0.628456	2453.8		Gapdh	0.257111	114.864		Il1rapl1	0.376413	135.487		Kcnn2	0.148845	29.6071		Krit1	0.256154	24.7958		Pcca	0.340969	76.3507
Dok6	0.0554597	16.3971		Gabbr1	0.500584	1531.55		Glg1	0.0948121	21.0141		Kcnma1	0.40447	98.5541		Kmt2c	0.221899	109.542		Wdfy3	0.245479	37.0573		Peg3	0.267642	125.138
Dpp6	0.280553	50.3877		Gnas	0.630591	2870.64		Glud1	0.0266201	0.678409		Limch1	0.289543	74.2284		Ktn1	0.348417	129.501		Cdh2	0.176518	30.5565		Ptprs	0.390586	54.2542
Dscam	0.230103	73.0226		Gnb1	0.289825	816.366		Gm3448	0.00548158	0		Lrrc4c	0.256414	83.4949		Lrba	0.270849	122.659		Ctnna3	0.159772	1.17798		Rbfox1	0.462058	118.296
Ecpas	0.162029	23.2177		Gpx4	0.511614	1757.27		Gphn	-0.0210847	0		Luc7l3	0.296475	40.1546		Lsamp	0.188037	281.723		Lrp1b	0.112621	13.4813		Rfx7	0.405003	48.1064
ENSMUSG00000092329	0.207911	26.2987		Grina	0.586416	1969.02		Gpm6a	0.0974013	9.46311		Mast4	0.332887	113.96		Macf1	0.300212	226.542		Mbnl2	0.104299	12.2475		Rims2	0.245544	86.6297
ENSMUSG00000109536	0.209928	173.118		Gsk3b	0.190536	84.454		Gpm6b	0.292806	117.318		Nav2	0.367657	83.4607		Magi1	0.326826	212.796		Itsn2	0.0936616	19.8842		Rnf130	0.588203	154.385
Epb41l3	0.235481	97.2931		H3f3b	0.560841	1529.94		Gucy1a2	0.0709368	13.4352		Nbea	0.332281	103.748		Mgat4c	0.324669	134.383		Tmcc1	0.0872983	70.6903		Robo1	0.154735	89.4755
Etnk1	0.0800985	20.4865		Hint1	0.757256	4315.02		Hmg20a	0.113997	36.381		Nkain2	0.396566	258.839		Mir99ahg	0.466655	345.236		Dock9	0.0852524	17.7311		Rsrc1	0.466391	103.781
Fam155a	0.16711	41.5188		Hmgb1	0.210362	311.649		Itm2b	0.27774	133.21		Nlgn1	0.43636	88.5224		Msi2	0.287418	93.8116		Ttll7	0.0784704	32.954		Sgip1	0.342084	154.508
Fars2	0.0809688	10.574		Hsp90aa1	0.769604	2588.98		Itm2c	0.331482	165.399		Nol4	0.271043	53.1454		Myo6	0.137508	122.195		Pde4b	0.0781105	27.8621		Sh3kbp1	0.284118	33.8485
Fgf12	0.142021	71.1704		Hsp90ab1	0.752072	2533.34		Jmjd1c	0.0123235	0		Otud7a	0.35717	123.197		Ncoa1	0.213924	113.063		Gnao1	0.0691028	0		Slc24a2	0.326269	52.9866
Fgf14	0.0590388	28.4213		Hspa8	0.793638	5700.33		Kdm2a	0.105711	1.58572		Paxbp1	0.283722	168.778		Ncor1	0.077233	75.1861		Tmem178b	0.0634283	57.8278		Slc25a12	0.290654	32.8834
Fhit	0.150664	56.6065		Impact	0.586752	2504.5		Kif5b	0.121123	19.3058		Pcdh7	0.19894	132.212		Nebl	0.540608	142.319		Dock10	0.0611864	11.065		Sorbs1	0.356583	95.9922
Frmd4a	0.295948	115.41		Itfg1	0.331587	623.27		Kmt2a	0.00554025	0		Pcdh9	0.312805	49.6559		Nfat5	0.284118	39.3477		Magi2	0.0588561	29.5949		Specc1	0.368283	56.7302
Fubp1	0.108514	32.1192		Kxd1	0.249615	521.163		Lamp1	0.218358	90.4304		Pclo	0.23271	72.9052		Npas3	0.443181	322.162		Mapt	0.0546671	0.726289		Sptan1	0.363093	51.9416
Gabrb3	0.192225	17.2746		Lcor	0.17007	315.594		Lncpint	0.0227383	1.28439		Pde4d	0.519547	234.954		Nrcam	0.362132	401.673		Iqsec1	0.0543369	25.7067		Tanc2	0.399983	95.6927
Galnt13	0.0752282	12.9545		Ly6h	0.696257	5020.31		Malat1	0.0351638	0		Pde4dip	0.308353	38.6058		Ntm	0.333309	370.512		Dip2b	0.0520538	19.8523		Tenm4	0.404302	82.6484
Gm20498	0.0134938	0.500227		Map7d2	0.19765	642.314		Map1b	0.105766	16.4746		Phf21a	0.186176	27.4985		Osbpl9	0.186197	84.8444		Plcl1	0.0512337	64.3557		Trim9	0.594228	55.9596
Gmds	0.0724337	11.112		Matr3	0.367895	903.393		Map4	0.0427419	0.957513		Pja2	0.46265	239.103		Oxct1	0.255618	153.186		Pak5	0.049345	147.872		Trip12	0.315589	17.4541
Golgb1	0.208396	89.0758		Mdh1	0.713181	4284.62		Mark3	0.198509	19.9547		Pkn2	0.361163	89.1388		Pbx1	0.0760468	48.1114		Wnk1	0.0487658	70.3608		Trps1	0.565559	214.143
Gprasp1	0.310106	81.6019		Micu3	0.0763263	49.5592		Mettl23	0.105051	17.0078		Pnisr	0.168981	31.3083		Pcmtd1	0.372373	138.269		Fgfr2	0.0421502	6.08035		Ttc14	0.493332	47.4288
Grid2	0.0104389	0.899927		Mtch1	0.707698	4113.74		Mkln1	0.297674	43.0767		Pnn	0.132056	113.589		Phlpp1	0.277135	61.7948		Clasp2	0.0413488	41.1687		Unc5c	0.569034	69.5239
Grik2	0.254661	89.4358		Nap1l5	0.752656	3639.49		Mpc1	0.182738	48.747		Ppp2r3a	0.333636	38.6163		Pias1	0.358505	140.037		Rtn4	0.040047	52.0718		Vwa8	0.373149	19.5514
Grip1	0.209318	17.2625		Ndfip1	0.785337	5688.35		Mt3	0.222083	132.085		Prkcb	0.309592	54.4866		Pitpnc1	0.523811	453.38		Tbc1d5	0.0388599	46.7838		Xpo7	0.130919	19.0086
Grm5	0.33201	132.794		Ndn	0.763335	4385.69		Mtdh	0.102651	3.79222		Prkg1	0.517385	121.876		Plcb1	0.196042	54.5077		Nfasc	0.0300319	20.3732
Herc1	0.220515	27.7498		Ndufa13	0.659705	3076.32		Myef2	0.00881671	0.899927		Pten	0.320552	106.075		Plxdc2	0.48138	61.2289		Rasal2	0.0273917	1.15998
Hivep2	0.065488	11.142		Ndufa4	0.73444	4011.61		Nbas	0.00173174	0		Ptprd	0.425407	249.981		Ptk2	0.285977	104.478		Acaca	0.027301	21.5518
Ipw	0.135219	83.3567		Ndufc2	0.740969	3633.31		Ncald	0.0883336	6.34438		Rbm26	0.313443	55.1777		Ralgapa1	0.108133	78.9419		Fnbp1	0.0265747	41.6649
Kcnq1ot1	0.148786	33.7281		Nptn	0.321559	1049.83		Nckap1	0.197734	10.3072		Rev3l	0.234581	16.3896		Rbm25	0.0394432	15.8588		Trim2	0.0231865	25.5654
Kirrel3	0.332896	79.0018		Oaz1	0.621325	1864.53		Nedd4	0.176341	13.5941		Rmst	0.407222	324.395		Rnpc3	0.119263	35.6911		Scd2	0.0198326	41.445
Large1	0.44578	110.962		Pam	0.135724	108.025		Nedd4l	-0.0502563	12.3376		Rsrp1	0.347819	122.668		Rora	0.318252	564.796		Mir100hg	0.0192035	24.8286
Lingo2	0.469091	111.352		Pcsk1n	0.740659	6650.17		Nnat	0.252227	103.659		Shtn1	0.279911	57.633		Spag9	0.31386	210.301		Ctnna2	0.0172765	16.7014
Lrfn5	0.119219	40.6147		Pebp1	0.647264	2223.7		Npepps	0.184776	19.2944		Slc24a3	0.412086	197.065		Srgap1	0.0915747	59.6908		Prickle2	0.00698687	13.5285
Lrrtm4	0.301137	57.6457		Pkm	0.697455	2782.52		Nrxn2	0.169646	22.8629		Srek1	0.11694	52.3072		Srgap3	0.101746	102.864		Exoc4	0.00221187	14.6636
Macrod2	0.199266	33.5377		Ppia	0.76689	5187.88		Nsd1	0.185148	12.2114		Srrm2	0.404819	406.885		Stox2	0.166887	29.4822		Foxp1	0.00125362	41.9049
Mapk10	0.314829	22.2541		Prkacb	0.145331	261.248		Nt5c2	0.00572724	0		Ssbp2	0.199888	64.8556		Sumo1	0.241256	91.4785		Foxn3	0.00115144	52.7706
Mbd5	0.290236	118.363		Psip1	0.380647	637.343		Ntrk2	0.352245	129.248		Strbp	0.248963	165.817		Syne1	0.226002	121.047
Mbtd1	0.0940771	30.2078		Rab2a	0.238167	468.382		Pafah1b1	0.18953	10.574		Syn2	0.0509813	6.47338		Tafa5	0.319881	151.211
Mdga2	0.289381	112.878		Rabac1	0.765377	4445.94		Paip2	0.216262	48.7376		Taf15	0.406654	32.0145		Tcf4	0.0846425	64.934
Med12l	0.282328	124.385		Resp18	0.750643	6243.84		Pan3	0.150391	17.4186		Tia1	0.217676	64.4		Tenm3	0.163015	44.775
Mef2a	0.467185	34.0154		Rpl11	0.666023	2489.49		Papola	0.0611473	5.19834		Tnrc6a	0.290068	46.8579		Tnrc6b	0.182568	126.375
Meg3	0.0201835	3.73962		Rpl13	0.573649	2315.54		Pcm1	0.382497	71.5537		Tra2a	0.281124	162.852		Trpm3	0.58114	584.541
Mycbp2	0.0147189	0.863141		Rpl19	0.71174	3089.73		Picalm	0.0279217	2.85861		U2surp	0.138259	62.7596		Tsix	0.343787	704.928
Myo5a	0.142206	41.8011		Rpl21	0.696459	2418.94		Pkp4	0.170536	33.307		Ubr3	0.252392	161.374		Xist	0.414674	361.859
Myo9a	0.326768	28.4416		Rpl23	0.630662	1656.33		Plp1	0.0669555	18.8624		Ulk2	0.25834	42.7041		Zeb1	0.182665	52.2817
N4bp2l2	0.251444	73.1862		Rpl24	0.679964	2025.34		Ppib	0.233733	54.2507		Vps13a	0.234586	81.1961		Zhx3	0.0170191	4.54773
Nalcn	0.142922	17.3763		Rpl27a	0.532612	1098.69		Prn	0.0178257	1.64727		Zfr	0.368031	77.0576
Nav1	0.324729	41.5856		Rpl3	0.649875	2224.69		Psap	0.103883	32.8387
Nbeal1	0.249601	37.2659		Rpl35a	0.555987	1225.32		Psd3	0.0180591	0
Ncam2	0.472556	89.2189		Rpl37	0.594448	1009.99		Ptgds	0.00336473	2.5482
Nova1	0.252325	56.8949		Rpl37a	0.502836	1039.9		Ptma	0.41053	117.769
Nrg3	0.0237368	7.04634		Rpl38	0.437735	669.661		Ptn	0.34309	115.106
Nrxn1	0.257624	84.2881		Rpl41	0.640454	1850.87		Ptprz1	0.117212	21.6127
Nrxn3	0.168775	69.258		Rpl6	0.592196	1778.6		Pum1	0.0994639	7.40037
Ntrk3	0.302386	47.9483		Rpl8	0.722603	2516.02		Rbm5	0.0218591	0
Nudcd3	0.0409411	6.39134		Rpl9	0.527656	1090.41		Reep5	0.0837514	30.1568
Opcml	0.0801144	40.9931		Rplp1	0.66467	2321.01		Relch	0.0816539	2.81392
Oxr1	0.366572	109.7		Rplp2	0.649053	2338.06		Rn18s-rs5	0.258095	156.35
Pak3	0.312945	27.5287		Rps10	0.636152	2014.88		Rnf13	0.161004	38.3826
Phactr1	0.383786	37.517		Rps2	0.644932	2838.68		Septin7	0.0183518	0
Phactr3	0.193998	73.343		Rps21	0.496399	927.935		Slc25a36	0.0799429	8.45375
Phf20l1	0.340824	63.8093		Rps24	0.490732	1041.72		Slc44a1	0.129878	3.50159
Pi4ka	0.0788384	20.6345		Rps27a	0.527793	1456.85		Slc6a1	0.0160555	0
Pid1	0.385492	71.4964		Rps8	0.610492	1663.38		Sltm	0.0799853	19.7226
Ppp1r12b	0.228884	36.4393		Rtn1	0.745885	6204.2		Spock3	0.00812473	0
Prickle1	0.115476	49.0018		Rtn3	0.127438	115.155		Srpk2	0.180744	17.3773
Prkce	0.109144	39.8092		Scg5	0.697526	5927		Srsf2	0.0295215	3.45257
Prkn	0.164486	34.6521		Sec62	0.310234	389.251		Syt1	0.00146567	0
Prpf4b	0.0298817	8.52883		Selenok	0.529799	2522.51		Tcf12	0.0797429	2.9932
Ptprn2	0.0950833	18.9146		Selenow	0.472924	1397.01		Thra	0.0453465	5.50401
R3hdm2	0.157288	43.6906		Serinc1	0.357308	607.027		Tmeff2	0.0724196	0.742621
Ralyl	0.232942	68.0471		Slc22a17	0.508974	2166.76		Tmod2	0.0278977	0
Rapgef2	0.1587	30.9179		Slc25a3	0.585274	2075.17		Tmsb4x	0.237121	62.6035
Rgs7	0.265588	51.0205		Slc25a4	0.645179	1826.53		Tsc22d1	0.0399127	1.83757
Rims1	0.0672033	16.0135		Snrpn	0.429256	2109.87		Tspan5	0.109958	0.601865
Samd12	0.137093	24.2209		Stmn1	0.534202	1831.3		Tuba1a	0.38617	144.896
Sclt1	0.184431	145.09		Stmn2	0.545145	2373.39		Ube2h	0.115376	8.0975
Sema6d	0.332622	22.2669		Stmn3	0.751934	4880.86		Ubr5	0.0130248	0.937972
Sfpq	0.169023	56.0119		Sumo2	0.291716	615.199		Usp9x	0.00506345	0
Sgcz	0.167117	44.6716		Syt11	0.153303	119.463		Vmp1	0.0453751	0
Slc8a1	0.131078	24.1673		Tecr	0.746134	5981.99		Vsnl1	0.284083	66.484
Smyd3	0.0774527	9.8762		Tmem59	0.49716	1667.22		Ywhaq	0.0951925	3.46013
Sntg1	0.488084	54.1676		Tmsb10	0.744111	4957.26		Zdhhc20	0.138234	5.19834
Sorcs1	0.364807	93.4843		Tmx4	0.396816	1084.81		Zfp462	0.17997	12.7827
Srsf7	0.106627	38.059		Tpr	0.223606	344.52		Zfp608	0.197444	33.5064
Ssh2	0.0417664	7.98918		Tpt1	0.696426	2265.03
Stau2	-0.00168168	12.7884		Tspan3	0.483133	1806.8
Sybu	0.102743	41.3731		Ttc3	0.243199	835.151
Tcaf1	0.1215	14.3627		Tubb2a	0.747121	5412.83
Tenm2	0.176702	54.1869		Uba52	0.360665	853.654
Thoc2l	0.233623	25.7795		Ubb	0.779288	5622.92
Tnik	0.230751	73.5508		Ubc	0.578484	2028.92
Tnrc6c	0.156483	16.9755		Uchl1	0.686818	4988.47
Ttc19	0.231565	106.227		Ywhae	0.460906	958.235
Ube3a	0.290586	228.688		Zcchc18	0.442023	594.6
Ube3c	0.400039	87.5116		Zwint	0.755654	3897.65
Ubn2	0.0882074	20.3071
Unc80	0.13026	32.0597
Upp2	0.0448116	9.40462
Vps13b	0.344547	99.4016
Wac	0.0392092	8.61762
Wsb1	0.208318	36.7439
Xkr4	0.305015	77.8333
Xkr6	0.165406	22.5349
Xpr1	0.0841266	12.5891
Zcchc7	0.189977	39.4226
Zfp280d	0.137875	35.2855
Zmynd8	0.123424	29.5067
Zranb2	0.30977	90.833
